# Supplementary material
Source: PubMed Central journal article supplement (PMC9675946)
Supplement: NIHMS1845806-supplement-1845806_SD_ED_Fig_1.pdf [file NIHMS1845806-supplement-1845806_SD_ED_Fig_1.pdf]

# ExtendedFigure1

## B2\_1\_NP

| Days_since_symptom_onset | Visit_day | NP viral load | E484 | 484K |
|--------------------------|-----------|---------------|------|------|
| 8                        | 0         | 5.31          | 0    | 100  |
| 9                        | 1         |               |      |      |
| 10                       | 2         |               |      |      |
| 11                       | 3         | 2.31          |      | 100  |
| 12                       | 4         |               |      |      |
| 13                       | 5         |               |      |      |
| 14                       | 6         |               |      |      |
| 15                       | 7         | 0             |      |      |
| 16                       | 8         |               |      |      |
| 17                       | 9         |               |      |      |
| 18                       | 10        |               |      |      |
| 19                       | 11        |               |      |      |
| 20                       | 12        |               |      |      |
| 21                       | 13        |               |      |      |
| 22                       | 14        | 2             |      | 100  |
| 23                       |           |               |      |      |
| 24                       |           |               |      |      |
| 25                       |           |               |      |      |
| 26                       |           |               |      |      |
| 27                       |           |               |      |      |
| 28                       |           |               |      |      |
| 29                       | 21        | 0             |      |      |
| 30                       |           |               |      |      |
| 31                       |           |               |      |      |
| 32                       |           |               |      |      |
| 33                       |           |               |      |      |
| 34                       |           |               |      |      |
| 35                       |           |               |      |      |
| 36                       | 28        | 0             |      |      |

B2\_1\_AN

| Days_since_symptom_onset | Visit_day | AN viral load | E484 | 484K |
|--------------------------|-----------|---------------|------|------|
| 8                        | 0         | 2.08          |      | 100  |
| 9                        | 1         | 1             |      |      |
| 10                       | 2         | 1             |      |      |
| 11                       | 3         | 0             |      |      |
| 12                       | 4         |               |      |      |
| 13                       | 5         | 1             |      |      |
| 14                       | 6         | 0             |      |      |
| 15                       | 7         | 0             |      |      |
| 16                       | 8         | 0             |      |      |
| 17                       | 9         | 0             |      |      |
| 18                       | 10        | 0             |      |      |
| 19                       | 11        | 0             |      |      |
| 20                       | 12        | 0             |      |      |
| 21                       | 13        | 1             |      |      |
| 22                       | 14        | 0             |      |      |
| 23                       |           |               |      |      |
| 24                       |           |               |      |      |
| 25                       |           |               |      |      |
| 26                       |           |               |      |      |
| 27                       |           |               |      |      |
| 28                       |           |               |      |      |
| 29                       | 21        | 0             |      |      |
| 30                       |           |               |      |      |
| 31                       |           |               |      |      |
| 32                       |           |               |      |      |
| 33                       |           |               |      |      |
| 34                       |           |               |      |      |
| 35                       |           |               |      |      |
| 36                       | 28        | 0             |      |      |

B2\_2\_NP

| Days_since_symptom_onset | Visit_day | NP viral load | E484 | 484K | 484Q |
|--------------------------|-----------|---------------|------|------|------|
| 6                        | 0         | 6.44          | 36   | 61   | 3    |
| 7                        | 1         |               |      |      |      |
| 8                        | 2         |               |      |      |      |
| 9                        | 3         | 4.91          | 3    | 97   |      |
| 10                       | 4         |               |      |      |      |
| 11                       | 5         |               |      |      |      |
| 12                       | 6         |               |      |      |      |
| 13                       | 7         | 4.95          |      |      | 100  |
| 14                       | 8         |               |      |      |      |
| 15                       | 9         |               |      |      |      |
| 16                       | 10        |               |      |      |      |
| 17                       | 11        |               |      |      |      |
| 18                       | 12        |               |      |      |      |
| 19                       | 13        |               |      |      |      |
| 20                       | 14        | 2.38          |      | 51   | 49   |
|                          |           |               |      |      |      |
|                          |           |               |      |      |      |
|                          |           |               |      |      |      |
|                          |           |               |      |      |      |
|                          |           |               |      |      |      |
|                          |           |               |      |      |      |
| 27                       | 21        | 0             |      |      |      |
|                          |           |               |      |      |      |
|                          |           |               |      |      |      |
|                          |           |               |      |      |      |
|                          |           |               |      |      |      |
|                          |           |               |      |      |      |
|                          |           |               |      |      |      |
| 34                       | 28        | 1             |      |      |      |

B2\_2\_AN

| Days_since_symptom_onset | Visit_day | AN viral load | E484 | 484K | 484Q |
|--------------------------|-----------|---------------|------|------|------|
| 6                        | 0         | 5.81          | 94   | 3    | 3    |
| 7                        | 1         | 3.57          | 49   | 33   | 18   |
| 8                        | 2         | 3.94          | 2    | 98   |      |
| 9                        | 3         | 3.45          | 2    | 76   | 22   |
| 10                       | 4         | 4.3           | 32   | 12   | 56   |
| 11                       | 5         | 4.9           |      | 96   | 4    |
| 12                       | 6         | 4.27          |      | 90   | 10   |
| 13                       | 7         | 3.56          |      | 44   | 56   |
| 14                       | 8         | 6.55          |      | 100  |      |
| 15                       | 9         | 5.69          |      | 85   | 15   |
| 16                       | 10        | 5.41          |      | 98   | 2    |
| 17                       | 11        | 6.82          |      |      | 100  |
| 18                       | 12        | 6.82          |      |      | 100  |
| 19                       | 13        | 5.07          |      |      | 100  |
| 20                       | 14        | 3.81          |      |      | 100  |
|                          |           |               |      |      |      |
|                          |           |               |      |      |      |
|                          |           |               |      |      |      |
|                          |           |               |      |      |      |
|                          |           |               |      |      |      |
|                          |           |               |      |      |      |
|                          |           |               |      |      |      |
|                          |           |               |      |      |      |
| 27                       | 21        | 0             |      |      |      |
|                          |           |               |      |      |      |
|                          |           |               |      |      |      |
|                          |           |               |      |      |      |
|                          |           |               |      |      |      |
|                          |           |               |      |      |      |
|                          |           |               |      |      |      |
|                          |           |               |      |      |      |
|                          |           |               |      |      |      |
| 34                       | 28        | 0             |      |      |      |

B2\_3\_NP

| Days_since_symptom_onset | Visit_day | NP viral load | E484 | 484K |
|--------------------------|-----------|---------------|------|------|
| 2                        | 0         | 6.72          | 100  |      |
| 3                        | 1         |               |      |      |
| 4                        | 2         |               |      |      |
| 5                        | 3         | 5.93          | 84   | 16   |
| 6                        | 4         |               |      |      |
| 7                        | 5         |               |      |      |
|                          |           |               |      |      |
| 9                        | 7         | 6.03          | 3    | 97   |
| 10                       | 8         |               |      |      |
| 11                       | 9         |               |      |      |
| 12                       | 10        |               |      |      |
| 13                       | 11        |               |      |      |
| 14                       | 12        |               |      |      |
| 15                       | 13        |               |      |      |
| 16                       | 14        | 2.21          | 17   | 83   |
|                          |           |               |      |      |
|                          |           |               |      |      |
|                          |           |               |      |      |
|                          |           |               |      |      |
|                          |           |               |      |      |
|                          |           |               |      |      |
| 23                       | 21        | 1             |      |      |
|                          |           |               |      |      |
|                          |           |               |      |      |
|                          |           |               |      |      |
|                          |           |               |      |      |
|                          |           |               |      |      |
| 30                       | 28        | 0             |      |      |

B2\_3\_AN

| Days_since_symptom_onset | Visit_day | AN viral load | E484 | 484K |
|--------------------------|-----------|---------------|------|------|
| 2                        | 0         | 7.34          | 100  |      |
| 3                        | 1         | 7.52          | 100  |      |
| 4                        | 2         | 5.28          | 100  |      |
| 5                        | 3         | 4.22          | 92   | 8    |
| 6                        | 4         | 5.76          | 2    | 98   |
| 7                        | 5         | 6.77          | 2    | 98   |
|                          |           |               |      |      |
| 9                        | 7         | 7.77          |      | 100  |
| 10                       | 8         | 6.85          |      | 100  |
| 11                       | 9         | 6.73          |      | 100  |
| 12                       | 10        | 5.72          | 3    | 97   |
| 13                       | 11        | 4.15          |      | 100  |
| 14                       | 12        | 3.45          |      | 100  |
| 15                       | 13        | 1             |      |      |
| 16                       | 14        | 0             |      |      |
|                          |           |               |      |      |
|                          |           |               |      |      |
|                          |           |               |      |      |
|                          |           |               |      |      |
|                          |           |               |      |      |
|                          |           |               |      |      |
| 23                       | 21        | 0             |      |      |
|                          |           |               |      |      |
|                          |           |               |      |      |
|                          |           |               |      |      |
|                          |           |               |      |      |
|                          |           |               |      |      |
| 30                       | 28        | 0             |      |      |

B2\_4\_NP

| Days_since_symptom_onset | Visit_day | NP viral load | E484 | 484K |
|--------------------------|-----------|---------------|------|------|
| 8                        | 0         | 1             |      |      |
| 9                        | 1         |               |      |      |
| 10                       | 2         |               |      |      |
| 11                       | 3         | 0             |      |      |
| 12                       | 4         |               |      |      |
| 13                       | 5         |               |      |      |
| 14                       | 6         |               |      |      |
| 15                       | 7         | 1             |      |      |
| 16                       | 8         |               |      |      |
| 17                       | 9         |               |      |      |
| 18                       | 10        |               |      |      |
| 19                       | 11        |               |      |      |
| 20                       | 12        |               |      |      |
| 21                       | 13        |               |      |      |
| 22                       | 14        | 4.27          |      | 100  |
|                          |           |               |      |      |
|                          |           |               |      |      |
|                          |           |               |      |      |
|                          |           |               |      |      |
|                          |           |               |      |      |
|                          |           |               |      |      |
| 29                       | 21        | 2.07          |      | 100  |
|                          |           |               |      |      |
|                          |           |               |      |      |
|                          |           |               |      |      |
|                          |           |               |      |      |
|                          |           |               |      |      |
| 36                       | 28        | 1             |      |      |

## B2\_4\_NP

| <b>Days_since_symptom_onset</b> | <b>Visit_day</b> | <b>AN viral load</b> | <b>E484</b> | <b>484K</b> |
|---------------------------------|------------------|----------------------|-------------|-------------|
| 8                               | 0                | 4.73                 | 100         |             |
| 9                               | 1                | 0                    |             |             |
| 10                              | 2                | 2.08                 | 100         |             |
| 11                              | 3                | 0                    |             |             |
| 12                              | 4                | 0                    |             |             |
| 13                              | 5                | 1                    |             |             |
| 14                              | 6                | 0                    |             |             |
| 15                              | 7                | 1                    |             |             |
| 16                              | 8                | 3.51                 |             | 100         |
| 17                              | 9                | 0                    |             |             |
| 18                              | 10               | 5.2                  |             | 100         |
| 19                              | 11               | 4.27                 |             | 100         |
| 20                              | 12               | 3.6                  |             | 100         |
| 21                              | 13               | 3.27                 |             | 100         |
| 22                              | 14               | 1                    |             |             |
|                                 |                  |                      |             |             |
|                                 |                  |                      |             |             |
|                                 |                  |                      |             |             |
|                                 |                  |                      |             |             |
|                                 |                  |                      |             |             |
|                                 |                  |                      |             |             |
|                                 |                  |                      |             |             |
|                                 |                  |                      |             |             |
|                                 |                  |                      |             |             |
| 29                              | 21               | 2.25                 |             | 100         |
|                                 |                  |                      |             |             |
|                                 |                  |                      |             |             |
|                                 |                  |                      |             |             |
|                                 |                  |                      |             |             |
|                                 |                  |                      |             |             |
|                                 |                  |                      |             |             |
|                                 |                  |                      |             |             |
| 36                              | 28               | 0                    |             |             |



B2\_4\_NP

| Days_since_symptom_onset | Visit_day | NP viral load | E484 | 484Q |
|--------------------------|-----------|---------------|------|------|
| 4                        | 0         | 7.97          | 100  |      |
| 5                        | 1         |               |      |      |
| 6                        | 2         |               |      |      |
| 7                        | 3         | 6.97          | 100  |      |
| 8                        | 4         |               |      |      |
| 9                        | 5         |               |      |      |
| 10                       | 6         |               |      |      |
| 11                       | 7         | 2.92          | 12   | 88   |
| 12                       |           |               |      |      |
| 13                       | 9         |               |      |      |
| 14                       | 10        |               |      |      |
| 15                       | 11        |               |      |      |
| 16                       | 12        |               |      |      |
| 17                       | 13        |               |      |      |
| 18                       | 14        | 1             |      |      |
|                          |           |               |      |      |
|                          |           |               |      |      |
|                          |           |               |      |      |
|                          |           |               |      |      |
|                          |           |               |      |      |
| 25                       | 21        | 1             |      |      |
|                          |           |               |      |      |
|                          |           |               |      |      |
|                          |           |               |      |      |
|                          |           |               |      |      |
| 32                       | 28        | 0             |      |      |

B2\_5\_AN

| Days_since_symptom_onset | Visit_day | AN viral load | E484 | 484Q |
|--------------------------|-----------|---------------|------|------|
| 4                        | 0         | 6.61          | 100  |      |
| 5                        | 1         | 7.33          | 100  |      |
| 6                        | 2         | 5.14          | 100  |      |
| 7                        | 3         | 5.94          | 100  |      |
| 8                        | 4         | 3.88          | 26   | 74   |
| 9                        | 5         | 3.99          | 2    | 98   |
| 10                       | 6         | 4.22          |      | 100  |
| 11                       | 7         | 3.37          |      | 100  |
| 12                       |           |               |      |      |
| 13                       | 9         | 3.55          |      | 100  |
| 14                       | 10        | 2.57          |      | 100  |
| 15                       | 11        | 2.28          |      | 100  |
| 16                       | 12        | 4.16          |      | 100  |
| 17                       | 13        | 2.99          |      | 100  |
| 18                       | 14        | 2.36          |      | 100  |
|                          |           |               |      |      |
|                          |           |               |      |      |
|                          |           |               |      |      |
|                          |           |               |      |      |
|                          |           |               |      |      |
|                          |           |               |      |      |
|                          |           |               |      |      |
| 25                       | 21        | 0             |      |      |
|                          |           |               |      |      |
|                          |           |               |      |      |
|                          |           |               |      |      |
|                          |           |               |      |      |
|                          |           |               |      |      |
|                          |           |               |      |      |
| 32                       | 28        | 0             |      |      |

B2\_6\_NP

| Days_since_symptom_onset | Visit_day | NP_viral_load | E484 | 484K | 484Q |
|--------------------------|-----------|---------------|------|------|------|
| 8                        | 0         | 8.08          | 100  |      |      |
| 9                        | 1         |               |      |      |      |
| 10                       | 2         |               |      |      |      |
| 11                       | 3         | 7             | 90   | 10   |      |
| 12                       | 4         |               |      |      |      |
| 13                       | 5         |               |      |      |      |
| 14                       | 6         |               |      |      |      |
| 15                       | 7         | 7.13          |      | 94   | 6    |
| 16                       | 8         |               |      |      |      |
| 17                       | 9         |               |      |      |      |
| 18                       | 10        |               |      |      |      |
| 19                       | 11        |               |      |      |      |
| 20                       | 12        |               |      |      |      |
| 21                       | 13        |               |      |      |      |
| 22                       | 14        | 4.56          |      | 100  |      |
|                          |           |               |      |      |      |
|                          |           |               |      |      |      |
|                          |           |               |      |      |      |
|                          |           |               |      |      |      |
|                          |           |               |      |      |      |
| 29                       | 21        | 2.18          |      | 100  |      |
|                          |           |               |      |      |      |
|                          |           |               |      |      |      |
|                          |           |               |      |      |      |
|                          |           |               |      |      |      |
|                          |           |               |      |      |      |
| 36                       | 28        | 0             |      |      |      |

### B2\_6\_AN

| Days_since_symptom_onset | Visit_day | AN_viral_load | E484 | 484K | S494P |
|--------------------------|-----------|---------------|------|------|-------|
| 8                        | 0         | 6.76          | 100  |      |       |
| 9                        | 1         | 5.61          | 100  |      |       |
| 10                       | 2         | 7.24          | 100  |      |       |
| 11                       | 3         | 4.62          | 93   | 4    | 3     |
| 12                       | 4         | 6.7           |      | 100  |       |
| 13                       | 5         | 7             |      | 98   | 2     |
| 14                       | 6         | 5.46          | 56   | 42   | 2     |
| 15                       | 7         | 6.65          |      | 90   | 10    |
| 16                       | 8         | 6.78          |      | 97   | 3     |
| 17                       | 9         | 6.35          |      | 96   | 4     |
| 18                       | 10        | 5.52          |      | 100  |       |
| 19                       | 11        | 5.41          |      | 88   | 12    |
| 20                       | 12        | 4.16          |      | 100  |       |
| 21                       | 13        | 5.26          |      | 97   | 3     |
| 22                       | 14        | 3.7           |      | 84   | 16    |
|                          |           |               |      |      |       |
|                          |           |               |      |      |       |
|                          |           |               |      |      |       |
|                          |           |               |      |      |       |
|                          |           |               |      |      |       |
|                          |           |               |      |      |       |
|                          |           |               |      |      |       |
|                          |           |               |      |      |       |
| 29                       | 21        | 0             |      |      |       |
|                          |           |               |      |      |       |
|                          |           |               |      |      |       |
|                          |           |               |      |      |       |
|                          |           |               |      |      |       |
|                          |           |               |      |      |       |
|                          |           |               |      |      |       |
| 36                       | 28        | 0             |      |      |       |



### B2\_7\_AN

| Days_since_symptom_onset | Visit_day | N_viral_load | E484 | 484K | Daily_Symptom_score |
|--------------------------|-----------|--------------|------|------|---------------------|
| 4                        | 0         | 7.29         | 100  |      | 9                   |
| 5                        | 1         | 7.01         | 100  |      | 6                   |
| 6                        | 2         | 6.43         | 100  |      | 6                   |
| 7                        | 3         | 5.33         | 100  |      | 5                   |
| 8                        | 4         | 4.16         | 100  |      | 6                   |
| 9                        | 5         | 3.62         | 100  |      | 5                   |
| 10                       | 6         | 2.59         | 8    | 92   | 0                   |
| 11                       | 7         | 4.97         | 2    | 98   | 0                   |
| 12                       |           |              |      |      | 0                   |
| 13                       |           |              |      |      | 1                   |
| 14                       | 10        | 6.61         | 34   | 66   | 6                   |
| 15                       | 11        | 7.74         | 14   | 86   | 8                   |
| 16                       | 12        | 7.51         |      | 100  | 10                  |
| 17                       | 13        | 6.86         |      | 100  | 11                  |
| 18                       | 14        | 4.59         |      | 100  | 9                   |
|                          |           |              |      |      | 9                   |
|                          |           |              |      |      | 5                   |
|                          |           |              |      |      | 8                   |
|                          |           |              |      |      | 5                   |
|                          |           |              |      |      | 16                  |
|                          |           |              |      |      | 16                  |
|                          |           |              |      |      | 9                   |
|                          |           |              |      |      | 15                  |
|                          |           |              |      |      | 15                  |
|                          |           |              |      |      | 13                  |
|                          |           |              |      |      | 6                   |
|                          |           |              |      |      |                     |
|                          |           |              |      |      | 5                   |
| 32                       | 28        | 1            |      |      | 3                   |

B2\_8\_NP

| Days_since_symptom_onset | Visit_day | NP_viral_load | E484 | 484K |
|--------------------------|-----------|---------------|------|------|
| 5                        | 0         | 7.6           | 100  |      |
| 6                        | 1         |               |      |      |
| 7                        | 2         |               |      |      |
| 8                        | 3         | 6.39          | 100  |      |
| 9                        | 4         |               |      |      |
| 10                       | 5         |               |      |      |
| 11                       | 6         |               |      |      |
| 12                       | 7         | 3.28          | 100  |      |
| 13                       | 8         |               |      |      |
| 14                       | 9         |               |      |      |
| 15                       | 10        |               |      |      |
| 16                       | 11        |               |      |      |
| 17                       | 12        |               |      |      |
| 18                       | 13        |               |      |      |
| 19                       | 14        | 6.62          |      | 100  |
|                          |           |               |      |      |
|                          |           |               |      |      |
|                          |           |               |      |      |
|                          |           |               |      |      |
|                          |           |               |      |      |
| 26                       | 21        | 0             |      |      |
|                          |           |               |      |      |
|                          |           |               |      |      |
|                          |           |               |      |      |
|                          |           |               |      |      |
|                          |           |               |      |      |
| 33                       | 28        | 0             |      |      |

B2\_8\_AN

| Days_since_symptom_onset | Visit_day | AN_viral_load | E484 | 484K |
|--------------------------|-----------|---------------|------|------|
| 5                        | 0         | 5.89          | 100  |      |
| 6                        | 1         | 6.83          | 100  |      |
| 7                        | 2         | 4.65          | 100  |      |
| 8                        | 3         | 2.46          | 100  |      |
| 9                        | 4         | 3.06          | 58   | 42   |
| 10                       | 5         | 3.85          |      | 100  |
| 11                       | 6         | 4.53          |      | 100  |
| 12                       | 7         | 2.05          |      | 100  |
| 13                       | 8         | 3.42          |      | 100  |
| 14                       | 9         | 5.77          |      | 100  |
| 15                       | 10        | 4.81          |      | 100  |
| 16                       | 11        | 5.08          |      | 100  |
| 17                       | 12        | 4.61          |      | 100  |
| 18                       | 13        | 3.89          |      | 100  |
| 19                       | 14        | 2.74          |      | 100  |
|                          |           |               |      |      |
|                          |           |               |      |      |
|                          |           |               |      |      |
|                          |           |               |      |      |
|                          |           |               |      |      |
|                          |           |               |      |      |
|                          |           |               |      |      |
|                          |           |               |      |      |
| 26                       | 21        | 0             |      |      |
|                          |           |               |      |      |
|                          |           |               |      |      |
|                          |           |               |      |      |
|                          |           |               |      |      |
|                          |           |               |      |      |
|                          |           |               |      |      |
| 33                       | 28        | 0             |      |      |



### B2\_9\_NP

| Days_since_symptom_onset | Visit_day | NP_viral_load | F490 | 490S |
|--------------------------|-----------|---------------|------|------|
| 3                        | 0         | 6.36          | 100  |      |
| 4                        | 1         |               |      |      |
| 5                        | 2         |               |      |      |
| 6                        | 3         | 5.92          | 100  |      |
| 7                        | 4         |               |      |      |
| 8                        | 5         |               |      |      |
| 9                        | 6         |               |      |      |
| 10                       | 7         | 2.76          | 88   | 12   |
| 11                       | 8         |               |      |      |
| 12                       | 9         |               |      |      |
| 13                       | 10        |               |      |      |
| 14                       | 11        |               |      |      |
| 15                       | 12        |               |      |      |
| 16                       | 13        |               |      |      |
| 17                       | 14        | 1             |      |      |
|                          |           |               |      |      |
|                          |           |               |      |      |
|                          |           |               |      |      |
|                          |           |               |      |      |
|                          |           |               |      |      |
|                          |           |               |      |      |
|                          |           |               |      |      |
|                          |           |               |      |      |
| 24                       | 21        |               |      |      |
|                          |           |               |      |      |
|                          |           |               |      |      |
|                          |           |               |      |      |
|                          |           |               |      |      |
|                          |           |               |      |      |
|                          |           |               |      |      |
|                          |           |               |      |      |
| 31                       | 28        | 0             |      |      |

## B2\_9\_AN

| Days_since_symptom_onset | Visit_day | AN_viral_load | F490 | 490S |
|--------------------------|-----------|---------------|------|------|
| 3                        | 0         | 6.52          | 100  |      |
| 4                        | 1         | 5.66          | 100  |      |
| 5                        | 2         | 6.07          | 100  |      |
| 6                        | 3         | 6.68          |      |      |
| 7                        | 4         | 4.15          | 100  |      |
| 8                        | 5         | 4.55          | 100  |      |
| 9                        | 6         | 2.73          | 100  |      |
| 10                       | 7         |               |      |      |
| 11                       | 8         | 1             |      |      |
| 12                       | 9         | 2.39          |      |      |
| 13                       | 10        | 0             |      |      |
| 14                       | 11        | 0             |      |      |
| 15                       | 12        | 1             |      |      |
| 16                       | 13        | 1             |      |      |
| 17                       | 14        | 0             |      |      |
|                          |           |               |      |      |
|                          |           |               |      |      |
|                          |           |               |      |      |
|                          |           |               |      |      |
|                          |           |               |      |      |
|                          |           |               |      |      |
|                          |           |               |      |      |
|                          |           |               |      |      |
| 24                       | 21        | 1             |      |      |
|                          |           |               |      |      |
|                          |           |               |      |      |
|                          |           |               |      |      |
|                          |           |               |      |      |
|                          |           |               |      |      |
| 31                       | 28        | 0             |      |      |

### B2\_10\_NP

| hce_symptom | Visit_day | NP_viral_load | S494 | 494P |
|-------------|-----------|---------------|------|------|
| 1           | 0         |               |      |      |
| 2           | 1         |               |      |      |
| 3           | 2         |               |      |      |
| 4           | 3         | 6.87          | 100  |      |
| 5           | 4         |               |      |      |
| 6           | 5         |               |      |      |
| 7           | 6         |               |      |      |
| 8           | 7         | 3.61          | 100  |      |
| 9           | 8         |               |      |      |
| 10          | 9         |               |      |      |
| 11          | 10        |               |      |      |
| 12          | 11        |               |      |      |
| 13          | 12        |               |      |      |
| 14          | 13        |               |      |      |
| 15          | 14        |               |      |      |
|             |           |               |      |      |
|             |           |               |      |      |
|             |           |               |      |      |
|             |           |               |      |      |
|             |           |               |      |      |
|             |           |               |      |      |
|             |           |               |      |      |
|             |           |               |      |      |
|             |           |               |      |      |
|             |           |               |      |      |
| 22          | 21        | 0             |      |      |
|             |           |               |      |      |
|             |           |               |      |      |
|             |           |               |      |      |
|             |           |               |      |      |
|             |           |               |      |      |
|             |           |               |      |      |
|             |           |               |      |      |
| 29          | 28        |               |      |      |

### B2\_10\_AN

| Days_since_symptom_onset | Visit_day | AN_viral_load | S494 | 494P |
|--------------------------|-----------|---------------|------|------|
| 1                        | 0         |               |      |      |
| 2                        | 1         | 2.8           | 100  |      |
| 3                        | 2         | 2.07          |      |      |
| 4                        | 3         | 4.63          |      |      |
| 5                        | 4         | 1             |      |      |
| 6                        | 5         | 1             |      |      |
| 7                        | 6         | 7             |      | 100  |
| 8                        | 7         | 1             |      |      |
| 9                        | 8         | 0             |      |      |
| 10                       | 9         | 0             |      |      |
| 11                       | 10        | 0             |      |      |
| 12                       | 11        | 0             |      |      |
| 13                       | 12        | 0             |      |      |
| 14                       | 13        | 0             |      |      |
| 15                       | 14        |               |      |      |
| 16                       |           |               |      |      |
| 17                       |           |               |      |      |
| 18                       |           |               |      |      |
| 19                       |           |               |      |      |
| 20                       |           |               |      |      |
| 21                       |           |               |      |      |
| 22                       | 21        | 0             |      |      |
|                          |           |               |      |      |
|                          |           |               |      |      |
|                          |           |               |      |      |
|                          |           |               |      |      |
|                          |           |               |      |      |
| 29                       | 28        |               |      |      |

B2\_11\_NP

| Days_since_symptom_onset | Visit_day | NP_viral_load | 452R |
|--------------------------|-----------|---------------|------|
| 8                        | 0         | 5.6           | 100  |
| 9                        | 1         |               |      |
| 10                       | 2         |               |      |
| 11                       | 3         | 2.51          | 100  |
| 12                       | 4         |               |      |
| 13                       | 5         |               |      |
| 14                       | 6         |               |      |
| 15                       | 7         | 3.21          | 100  |
| 16                       | 8         |               |      |
| 17                       | 9         |               |      |
| 18                       | 10        |               |      |
| 19                       | 11        |               |      |
| 20                       | 12        |               |      |
| 21                       | 13        |               |      |
|                          |           |               |      |
|                          |           |               |      |
|                          |           |               |      |
|                          |           |               |      |
|                          |           |               |      |
|                          |           |               |      |
|                          |           |               |      |
| 29                       | 21        | 1             |      |
|                          |           |               |      |
|                          |           |               |      |
|                          |           |               |      |
|                          |           |               |      |
|                          |           |               |      |
| 36                       | 28        | 0             |      |

B2\_11\_AN

| Days_since_symptom_onset | Visit_day | AN_viral_load | 452R | 484K |
|--------------------------|-----------|---------------|------|------|
| 8                        | 0         | 5.06          | 100  |      |
| 9                        | 1         | 5.42          | 100  |      |
| 10                       | 2         | 4.08          | 100  |      |
| 11                       | 3         | 3.21          | 91   | 9    |
| 12                       | 4         | 4.08          | 100  |      |
| 13                       | 5         | 0             |      |      |
| 14                       | 6         | 2.62          | 100  |      |
| 15                       | 7         | 1             |      |      |
| 16                       | 8         | 2.9           | 100  |      |
| 17                       | 9         | 2.2           | 100  |      |
| 18                       | 10        | 2.37          | 100  |      |
| 19                       | 11        | 1             |      |      |
| 20                       | 12        | 2.19          | 100  |      |
| 21                       | 13        | 0             |      |      |
|                          |           |               |      |      |
|                          |           |               |      |      |
|                          |           |               |      |      |
|                          |           |               |      |      |
|                          |           |               |      |      |
|                          |           |               |      |      |
|                          |           |               |      |      |
|                          |           |               |      |      |
| 29                       | 21        | 1             |      |      |
|                          |           |               |      |      |
|                          |           |               |      |      |
|                          |           |               |      |      |
|                          |           |               |      |      |
|                          |           |               |      |      |
|                          |           |               |      |      |
|                          |           |               |      |      |
|                          |           |               |      |      |
|                          |           |               |      |      |
| 36                       | 28        | 0             |      |      |

B2\_12\_NP

| Days_since_symptom_onset | Visit_day | NP_viral_load | 452R |
|--------------------------|-----------|---------------|------|
| 3                        | 0         | 4.21          | 100  |
| 4                        | 1         |               |      |
| 5                        | 2         |               |      |
| 6                        | 3         | 3.51          | 100  |
| 7                        | 4         |               |      |
| 8                        | 5         |               |      |
| 9                        | 6         |               |      |
| 10                       | 7         | 2.28          | 100  |
| 11                       | 8         |               |      |
| 12                       | 9         |               |      |
| 13                       | 10        |               |      |
| 14                       | 11        |               |      |
| 15                       | 12        |               |      |
| 16                       | 13        |               |      |
| 17                       | 14        | 1             |      |
|                          |           |               |      |
|                          |           |               |      |
|                          |           |               |      |
|                          |           |               |      |
|                          |           |               |      |
| 24                       | 21        | 2.7           | 100  |
|                          |           |               |      |
|                          |           |               |      |
|                          |           |               |      |
|                          |           |               |      |
|                          |           |               |      |
| 31                       | 28        | 1             |      |

B2\_12\_AN

| Days_since_symptom_onset | Visit_day | AN_viral_load | 452R |
|--------------------------|-----------|---------------|------|
| 3                        | 0         | 4.68          |      |
| 4                        | 1         | 2.13          |      |
| 5                        | 2         | 2.38          |      |
| 6                        | 3         | 2.13          |      |
| 7                        | 4         | 1             |      |
| 8                        | 5         | 4.12          |      |
| 9                        | 6         | 1             |      |
| 10                       | 7         | 1             |      |
| 11                       | 8         | 0             |      |
| 12                       | 9         | 1             |      |
| 13                       | 10        | 0             |      |
| 14                       | 11        | 0             |      |
| 15                       | 12        | 0             |      |
| 16                       | 13        | 0             |      |
| 17                       | 14        | 0             |      |
|                          |           |               |      |
|                          |           |               |      |
|                          |           |               |      |
|                          |           |               |      |
|                          |           |               |      |
|                          |           |               |      |
| 24                       | 21        | 0             |      |
|                          |           |               |      |
|                          |           |               |      |
|                          |           |               |      |
|                          |           |               |      |
|                          |           |               |      |
|                          |           |               |      |
| 31                       | 28        | 0             |      |



B2\_13\_NP

| Days_since_symptom_onset | Visit_day | NP viral load | 452R |
|--------------------------|-----------|---------------|------|
| 9                        | 0         | 2.16          | 100  |
| 10                       | 1         |               |      |
| 11                       | 2         |               |      |
| 12                       | 3         | 1             |      |
| 13                       | 4         |               |      |
| 14                       | 5         |               |      |
| 15                       | 6         |               |      |
| 16                       | 7         | 1             |      |
| 17                       | 8         |               |      |
| 18                       | 9         |               |      |
| 19                       | 10        |               |      |
| 20                       | 11        |               |      |
| 21                       | 12        |               |      |
| 22                       | 13        |               |      |
| 23                       | 14        | 0             |      |
|                          |           |               |      |
|                          |           |               |      |
|                          |           |               |      |
|                          |           |               |      |
|                          |           |               |      |
| 30                       | 21        | 0             |      |
|                          |           |               |      |
|                          |           |               |      |
|                          |           |               |      |
|                          |           |               |      |
|                          |           |               |      |
| 37                       | 28        | 0             |      |
