# Supplementary material
Source: PubMed Central journal article supplement (PMC9675946)
Supplement: NIHMS1845806-supplement-1845806_SD_ED_Fig_2.pdf [file NIHMS1845806-supplement-1845806_SD_ED_Fig_2.pdf]

ExtendedFigure2

|              | Emerging   | No emerging | Placebo    | Pre-pandemic |
|--------------|------------|-------------|------------|--------------|
| <b>Spike</b> | 318.097215 | 233.573244  | 6405.60075 | 55           |
| <b>Spike</b> | 613.883565 | 95.0767492  | 235.029932 | 43.76        |
| <b>Spike</b> | 11.382206  | 210.685307  | 166.494238 | 67.59        |
| <b>Spike</b> | 27.0931429 | 154.274482  | 201.843741 | 32.91        |
| <b>Spike</b> | 31.6966121 | 49.788075   | 50.1614649 | 20.85        |
| <b>Spike</b> | 183.046477 | 6992.05683  | 263.795617 | 73.7         |
| <b>Spike</b> |            | 69.0831215  | 138.847836 | 23.41        |
| <b>Spike</b> |            | 177.413544  | 237.377023 | 10.68        |
| <b>Spike</b> |            | 692.049855  | 61.6754988 | 125.92       |
| <b>Spike</b> |            | 8984.2851   | 63.9686527 | 158.7        |
| <b>Spike</b> |            | 205.947867  | 98.05343   |              |
| <b>Spike</b> |            | 290.464599  | 25.7315741 |              |
| <b>Spike</b> |            | 81.3858424  | 130.600301 |              |
| <b>Spike</b> |            | 2984.48966  | 104.193161 |              |
| <b>Spike</b> |            | 1262.49305  | 40.8738006 |              |
| <b>Spike</b> |            | 15.6815482  | 98.98751   |              |
| <b>Spike</b> |            | 62.0939851  | 71.5550211 |              |
| <b>Spike</b> |            | 154.553367  | 24.9573029 |              |
| <b>Spike</b> |            | 28.9761554  | 9.2208024  |              |
| <b>Spike</b> |            | 284.193703  | 154.624476 |              |
| <b>Spike</b> |            | 126.824226  | 1151.20561 |              |
| <b>Spike</b> |            | 16591.143   | 1345.69575 |              |
| <b>Spike</b> |            | 174.668063  | 3812.49437 |              |
| <b>Spike</b> |            | 24.2670251  | 164.783763 |              |
| <b>Spike</b> |            | 21.4804728  | 508.381737 |              |
| <b>Spike</b> |            | 359.94684   | 171.342625 |              |
| <b>Spike</b> |            | 159.921526  | 6020.31004 |              |
| <b>Spike</b> |            | 2656.04289  | 40049.27   |              |
| <b>Spike</b> |            | 2184.88545  | 78.9909212 |              |

|              |  |            |            |  |
|--------------|--|------------|------------|--|
| <b>Spike</b> |  | 88.7320251 | 166.555519 |  |
| <b>Spike</b> |  | 85.8432926 | 1088.89583 |  |
| <b>Spike</b> |  | 52.2931365 | 3916.73254 |  |
| <b>Spike</b> |  | 163.844018 | 44.337706  |  |
| <b>Spike</b> |  | 105.774945 | 60.4275671 |  |
| <b>Spike</b> |  | 18.3645622 | 8473.64779 |  |
| <b>Spike</b> |  | 7334.10191 | 261.196102 |  |
| <b>Spike</b> |  | 1147.34963 | 163.947408 |  |
| <b>Spike</b> |  | 4562.84064 | 599.499488 |  |
| <b>Spike</b> |  | 140.426732 | 90.8612424 |  |
| <b>Spike</b> |  | 53.1408659 | 1264.53374 |  |
| <b>Spike</b> |  | 23.015549  | 22489.9227 |  |
| <b>Spike</b> |  | 26.0019454 | 96.9482997 |  |
| <b>Spike</b> |  | 45.1466241 | 59.5345163 |  |
| <b>Spike</b> |  | 408.779821 | 26.413252  |  |
| <b>Spike</b> |  | 18.9667972 | 118.020276 |  |
| <b>Spike</b> |  | 879.757139 | 20.2223961 |  |
| <b>Spike</b> |  | 36.4998138 | 51.7826378 |  |
| <b>Spike</b> |  | 11.223382  | 43.9168759 |  |
| <b>Spike</b> |  | 3727.43482 | 3201.35302 |  |
| <b>Spike</b> |  | 9.5639602  | 1483.35493 |  |
| <b>Spike</b> |  | 285.626238 | 21.5261264 |  |
| <b>Spike</b> |  | 27.9792533 | 28.5436871 |  |
| <b>Spike</b> |  | 369.561292 | 21.7951403 |  |
| <b>Spike</b> |  | 174.597473 | 38.6113854 |  |
| <b>Spike</b> |  | 2514.59081 | 11.1418791 |  |
| <b>Spike</b> |  | 2865.80913 | 20.8030287 |  |
| <b>Spike</b> |  | 36.8409198 | 218.477354 |  |
| <b>Spike</b> |  | 78.2643111 | 206.582774 |  |
| <b>Spike</b> |  | 16.2241231 | 177.916328 |  |
| <b>Spike</b> |  | 43.9625936 | 2072.70058 |  |
| <b>Spike</b> |  | 378.0285   | 1314.71914 |  |

|              |  |            |            |  |
|--------------|--|------------|------------|--|
| <b>Spike</b> |  | 2252.90753 | 24.2906385 |  |
| <b>Spike</b> |  | 178.462133 | 638.255661 |  |
| <b>Spike</b> |  | 2039.23364 | 834.259148 |  |
| <b>Spike</b> |  | 56.6254597 | 68.1770604 |  |
| <b>Spike</b> |  | 133.318156 | 443.832869 |  |
| <b>Spike</b> |  | 20679.4503 | 41.4048922 |  |
| <b>Spike</b> |  | 45.0294058 | 398.981636 |  |
| <b>Spike</b> |  | 141.563929 | 319.969185 |  |
| <b>Spike</b> |  | 6640.78454 | 223.844975 |  |
| <b>Spike</b> |  | 21233.4609 | 128.051846 |  |
| <b>Spike</b> |  | 123.169342 | 166.653394 |  |
| <b>Spike</b> |  | 774.367455 | 112.13949  |  |
| <b>Spike</b> |  | 2239.38039 | 75.3744442 |  |
| <b>Spike</b> |  | 184.400652 | 669.585248 |  |
| <b>Spike</b> |  | 192.867354 | 175.493292 |  |
| <b>Spike</b> |  | 119.114905 | 164.716504 |  |
| <b>Spike</b> |  | 580.169809 | 1935.1988  |  |
| <b>Spike</b> |  | 3560.92076 | 93.3828177 |  |
| <b>Spike</b> |  | 5888.25717 | 8816.44525 |  |
| <b>Spike</b> |  | 69.8267124 | 74.954654  |  |
| <b>Spike</b> |  | 109.981928 | 45.4944986 |  |
| <b>Spike</b> |  | 22.2220284 | 853.399622 |  |
| <b>Spike</b> |  | 26.0988934 | 4367.25145 |  |
| <b>Spike</b> |  | 122.412622 | 1360.1594  |  |
| <b>Spike</b> |  |            | 30.1748499 |  |
| <b>Spike</b> |  |            | 129.934865 |  |
| <b>Spike</b> |  |            | 12.5880142 |  |
| <b>Spike</b> |  |            | 82.7469913 |  |
| <b>Spike</b> |  |            | 86.0606439 |  |
| <b>Spike</b> |  |            | 14099.9641 |  |
| <b>Spike</b> |  |            | 86632.6069 |  |
| <b>Spike</b> |  |            | 67.4061898 |  |

|              |            |            |            |       |
|--------------|------------|------------|------------|-------|
| <b>Spike</b> |            |            | 219.024478 |       |
| <b>Spike</b> |            |            | 103.431542 |       |
| <b>RBD</b>   | 59.6459733 | 593.357175 | 991.006329 | 13.82 |
| <b>RBD</b>   | 110.342444 | 98.5973391 | 80.7591114 | 53.79 |
| <b>RBD</b>   | 16.4415343 | 225.729346 | 2160.17936 | 56.15 |
| <b>RBD</b>   | 26.0816007 | 280.818981 | 54.2421043 | 21.08 |
| <b>RBD</b>   | 43.9549439 | 482.224382 | 484.434054 | 23.12 |
| <b>RBD</b>   | 43.4749905 | 405.404901 | 102.821076 | 79.52 |
| <b>RBD</b>   |            | 32.4445672 | 162.844915 | 34.02 |
| <b>RBD</b>   |            | 688.746335 | 123.02356  | 12.54 |
| <b>RBD</b>   |            | 79.2362938 | 102.035165 | 50.4  |
| <b>RBD</b>   |            | 376.63992  | 83.1316421 | 50.67 |
| <b>RBD</b>   |            | 65.2573989 | 79.5482608 |       |
| <b>RBD</b>   |            | 42.5822737 | 22.5755423 |       |
| <b>RBD</b>   |            | 116.885276 | 60.665337  |       |
| <b>RBD</b>   |            | 156.472929 | 33.6138298 |       |
| <b>RBD</b>   |            | 296.377698 | 36.3318477 |       |
| <b>RBD</b>   |            | 24.8106952 | 27.6481427 |       |
| <b>RBD</b>   |            | 59.694069  | 18.08      |       |
| <b>RBD</b>   |            | 30.9852461 | 46.7492192 |       |
| <b>RBD</b>   |            | 18.05      | 15.55      |       |
| <b>RBD</b>   |            | 384.493266 | 44.0032745 |       |
| <b>RBD</b>   |            | 78.8762496 | 358.593439 |       |
| <b>RBD</b>   |            | 4854.71546 | 280.603151 |       |
| <b>RBD</b>   |            | 16.5227036 | 3273.56203 |       |
| <b>RBD</b>   |            | 49.8326392 | 158.870758 |       |
| <b>RBD</b>   |            | 29.4163196 | 63.543414  |       |
| <b>RBD</b>   |            | 33.5195239 | 45.6901967 |       |
| <b>RBD</b>   |            | 28.0807126 | 244.471376 |       |
| <b>RBD</b>   |            | 469.731135 | 3317.69064 |       |
| <b>RBD</b>   |            | 395.505227 | 59.1079849 |       |
| <b>RBD</b>   |            | 40.5175937 | 50.2112882 |       |

|            |  |            |            |  |
|------------|--|------------|------------|--|
| <b>RBD</b> |  | 45.7660888 | 217.639804 |  |
| <b>RBD</b> |  | 70.1966774 | 20.6614457 |  |
| <b>RBD</b> |  | 54.8849184 | 32.4056601 |  |
| <b>RBD</b> |  | 4388.8156  | 28.5181464 |  |
| <b>RBD</b> |  | 26.0084907 | 2198.98777 |  |
| <b>RBD</b> |  | 802.563961 | 173.576862 |  |
| <b>RBD</b> |  | 36.3307463 | 37.0626622 |  |
| <b>RBD</b> |  | 252.946769 | 102.007105 |  |
| <b>RBD</b> |  | 46.9910915 | 57.2135879 |  |
| <b>RBD</b> |  | 44.882859  | 262.089983 |  |
| <b>RBD</b> |  | 26.9169313 | 1792.25513 |  |
| <b>RBD</b> |  | 23.8637448 | 66.6144    |  |
| <b>RBD</b> |  | 20.397353  | 60.6220254 |  |
| <b>RBD</b> |  | 50.1150554 | 24.95182   |  |
| <b>RBD</b> |  | 10.4507251 | 67.8167239 |  |
| <b>RBD</b> |  | 39.0651402 | 20.7914923 |  |
| <b>RBD</b> |  | 95.1913184 | 41.4056118 |  |
| <b>RBD</b> |  | 15.6076233 | 54.6537927 |  |
| <b>RBD</b> |  | 620.104526 | 620.495933 |  |
| <b>RBD</b> |  | 37.3274507 | 289.90875  |  |
| <b>RBD</b> |  | 34.1516494 | 36.5716151 |  |
| <b>RBD</b> |  | 19.6464473 | 32.0730102 |  |
| <b>RBD</b> |  | 691.995746 | 20.138193  |  |
| <b>RBD</b> |  | 60.3332769 | 25.9828168 |  |
| <b>RBD</b> |  | 28.4484125 | 18.8430752 |  |
| <b>RBD</b> |  | 46.6394339 | 15.7712842 |  |
| <b>RBD</b> |  | 84.4350843 | 89.7673406 |  |
| <b>RBD</b> |  | 135.7551   | 59.7376795 |  |
| <b>RBD</b> |  | 8.139022   | 53.1797555 |  |
| <b>RBD</b> |  | 51.2524313 | 106.752551 |  |
| <b>RBD</b> |  | 68.092025  | 397.644669 |  |
| <b>RBD</b> |  | 94.9368092 | 26.7253525 |  |

|            |  |            |            |  |
|------------|--|------------|------------|--|
| <b>RBD</b> |  | 24.7100855 | 34.9941181 |  |
| <b>RBD</b> |  | 276.899505 | 191.928262 |  |
| <b>RBD</b> |  | 56.2399296 | 35.7299706 |  |
| <b>RBD</b> |  | 25.1874673 | 24.9135001 |  |
| <b>RBD</b> |  | 1687.46559 | 51.2075249 |  |
| <b>RBD</b> |  | 66.7163223 | 170.944315 |  |
| <b>RBD</b> |  | 166.265908 | 21.4397823 |  |
| <b>RBD</b> |  | 2068.9146  | 125.199197 |  |
| <b>RBD</b> |  | 7077.79489 | 29.0819168 |  |
| <b>RBD</b> |  | 136.183644 | 22.1044649 |  |
| <b>RBD</b> |  | 74.4644057 | 27.376866  |  |
| <b>RBD</b> |  | 1049.05349 | 27.5561276 |  |
| <b>RBD</b> |  | 47.1983273 | 43.7977072 |  |
| <b>RBD</b> |  | 38.6836272 | 90.3009161 |  |
| <b>RBD</b> |  | 45.9468403 | 27.7089965 |  |
| <b>RBD</b> |  | 35.9630252 | 305.928782 |  |
| <b>RBD</b> |  | 260.295914 | 19.3164391 |  |
| <b>RBD</b> |  | 1575.16212 | 648.702625 |  |
| <b>RBD</b> |  | 37.7017565 | 54.3610344 |  |
| <b>RBD</b> |  | 20.8284376 | 31.6051683 |  |
| <b>RBD</b> |  | 17.7574786 | 211.175033 |  |
| <b>RBD</b> |  | 12.5956838 | 999.908369 |  |
| <b>RBD</b> |  | 23.9399087 | 173.371981 |  |
| <b>RBD</b> |  |            | 18.9662384 |  |
| <b>RBD</b> |  |            | 71.4108675 |  |
| <b>RBD</b> |  |            | 24.4734566 |  |
| <b>RBD</b> |  |            | 37.7080321 |  |
| <b>RBD</b> |  |            | 72.2175152 |  |
| <b>RBD</b> |  |            | 6280.50524 |  |
| <b>RBD</b> |  |            | 346.988914 |  |
| <b>RBD</b> |  |            | 58.2376372 |  |
| <b>RBD</b> |  |            | 76.7264737 |  |

|            |            |            |            |      |
|------------|------------|------------|------------|------|
| <b>RBD</b> |            |            | 175.798618 |      |
| <b>NTD</b> | 2.47144067 | 6.2641358  | 26.5248727 | 0.62 |
| <b>NTD</b> | 3.41726044 | 6.15952531 | 4.05119286 | 2.34 |
| <b>NTD</b> | 0.3261172  | 13.6293994 | 2.79556844 | 0.9  |
| <b>NTD</b> | 0.61168817 | 6.32702523 | 2.60242257 | 0.64 |
| <b>NTD</b> | 1.01019806 | 1.31       | 3.5        | 0.89 |
| <b>NTD</b> | 1.25734803 | 74.2003041 | 5.94       | 2.09 |
| <b>NTD</b> |            | 0.91       | 1.9        | 0.84 |
| <b>NTD</b> |            | 1.92       | 2.76       | 0.33 |
| <b>NTD</b> |            | 21.16      | 2.73       | 3.13 |
| <b>NTD</b> |            | 32.77      | 1.8360347  | 1.05 |
| <b>NTD</b> |            | 0.96540887 | 2.80577958 |      |
| <b>NTD</b> |            | 0.75       | 1.1382381  |      |
| <b>NTD</b> |            | 0.38       | 1.80576509 |      |
| <b>NTD</b> |            | 15.3631432 | 1.17146798 |      |
| <b>NTD</b> |            | 12.4730724 | 0.91022415 |      |
| <b>NTD</b> |            | 0.48       | 0.65       |      |
| <b>NTD</b> |            | 1.84769491 | 0.57       |      |
| <b>NTD</b> |            | 0.91299006 | 1.64456561 |      |
| <b>NTD</b> |            | 0.35       | 0.87013437 |      |
| <b>NTD</b> |            | 7.65354456 | 0.44       |      |
| <b>NTD</b> |            | 0.96256268 | 18.7335041 |      |
| <b>NTD</b> |            | 15.4859206 | 16.0109221 |      |
| <b>NTD</b> |            | 1.48747226 | 9.34935713 |      |
| <b>NTD</b> |            | 2.55847668 | 2.72117442 |      |
| <b>NTD</b> |            | 1.16689942 | 1.67330146 |      |
| <b>NTD</b> |            | 1.09196706 | 1.61544705 |      |
| <b>NTD</b> |            | 1.06827345 | 56.618192  |      |
| <b>NTD</b> |            | 8.42679961 | 331.903436 |      |
| <b>NTD</b> |            | 16.4301776 | 0.51       |      |
| <b>NTD</b> |            | 0.54       | 1.16782896 |      |
| <b>NTD</b> |            | 1.11       | 8.18269268 |      |

|     |  |            |            |  |
|-----|--|------------|------------|--|
| NTD |  | 1.11       | 0.97714146 |  |
| NTD |  | 1.03703931 | 0.82388497 |  |
| NTD |  | 1.26048505 | 0.69       |  |
| NTD |  | 0.49047938 | 92.7510181 |  |
| NTD |  | 167.229769 | 6.21284334 |  |
| NTD |  | 1.30861809 | 1.30484332 |  |
| NTD |  | 3.99320927 | 3.3703479  |  |
| NTD |  | 2.27036393 | 1.03851037 |  |
| NTD |  | 1.95726638 | 1.74529247 |  |
| NTD |  | 0.54518046 | 42.8587016 |  |
| NTD |  | 0.63702363 | 1.27905413 |  |
| NTD |  | 0.77922204 | 2.2185581  |  |
| NTD |  | 1.55242829 | 0.35       |  |
| NTD |  | 0.27206184 | 1.03561196 |  |
| NTD |  | 2.74345014 | 0.4        |  |
| NTD |  | 1.45891785 | 1.03156281 |  |
| NTD |  | 0.37       | 2.66029338 |  |
| NTD |  | 71.8447489 | 1.61555317 |  |
| NTD |  | 0.38       | 12.0484506 |  |
| NTD |  | 4.30884211 | 0.66815796 |  |
| NTD |  | 0.4        | 0.80061453 |  |
| NTD |  | 21.2586384 | 0.52       |  |
| NTD |  | 3.3875148  | 0.93520506 |  |
| NTD |  | 0.77211663 | 0.41       |  |
| NTD |  | 1.25569504 | 0.38       |  |
| NTD |  | 1.42791671 | 3.34027484 |  |
| NTD |  | 3.98006376 | 3.33062963 |  |
| NTD |  | 0.30148528 | 1.03324028 |  |
| NTD |  | 1.76228537 | 2.59634486 |  |
| NTD |  | 1.55618751 | 18.747616  |  |
| NTD |  | 2.56595856 | 0.5824581  |  |
| NTD |  | 0.58       | 4.06573573 |  |



|     |  |            |            |  |
|-----|--|------------|------------|--|
| NTD |  | 15.3104571 | 9.23096245 |  |
| NTD |  | 2.35790855 | 1.94317226 |  |
| NTD |  | 2.8661148  | 0.83270057 |  |
| NTD |  | 198.951099 | 2.1650657  |  |
| NTD |  | 2.19083591 | 0.80699447 |  |
| NTD |  | 5.18876896 | 1.20803839 |  |
| NTD |  | 51.5297604 | 2.30062316 |  |
| NTD |  | 216.184395 | 1.20940188 |  |
| NTD |  | 3.96766516 | 1.06       |  |
| NTD |  | 1.76154665 | 0.53397072 |  |
| NTD |  | 14.1621408 | 1.03196597 |  |
| NTD |  | 0.83       | 3.34412902 |  |
| NTD |  | 0.4400441  | 3.61856323 |  |
| NTD |  | 1.03782131 | 0.39       |  |
| NTD |  | 2.25764998 | 25.0292648 |  |
| NTD |  | 3.05875605 | 0.33773715 |  |
| NTD |  | 86.2691758 | 31.950211  |  |
| NTD |  | 0.3        | 3.26580764 |  |
| NTD |  | 0.80230674 | 0.88962884 |  |
| NTD |  | 0.62270716 | 4.23861597 |  |
| NTD |  | 0.25       | 5.72641144 |  |
| NTD |  | 0.64959068 | 6.24922127 |  |
| NTD |  |            | 1.21370322 |  |
| NTD |  |            | 0.55497711 |  |
| NTD |  |            | 0.32       |  |
| NTD |  |            | 0.55       |  |
| NTD |  |            | 2.16209937 |  |
| NTD |  |            | 116.985832 |  |
| NTD |  |            | 17.1434642 |  |
| NTD |  |            | 1.08278564 |  |
| NTD |  |            | 3.11854246 |  |
| NTD |  |            | 7.01205286 |  |

|   |            |            |            |        |
|---|------------|------------|------------|--------|
| N | 143.513025 | 240.245173 | 118127.151 | 228.46 |
| N | 1265.35626 | 580.650177 | 502.160721 | 58.1   |
| N | 104.400603 | 363.234542 | 1147.19874 | 28.99  |
| N | 219.147102 | 135.907516 | 118.676359 | 103.32 |
| N | 951.728237 | 3950.3503  | 186.694162 | 60.73  |
| N | 197.727432 | 4524.3999  | 718.434487 | 148.47 |
| N |            | 71.9818622 | 131.996522 | 119.52 |
| N |            | 225.70258  | 237.178413 | 88.84  |
| N |            | 101.459369 | 71.2801721 | 459.13 |
| N |            | 17819.6272 | 99.1667716 | 54.32  |
| N |            | 157.301011 | 174.360741 |        |
| N |            | 30.1149347 | 47.0113416 |        |
| N |            | 157.680792 | 319.428371 |        |
| N |            | 1745.88253 | 169.466857 |        |
| N |            | 2352.88838 | 47.3112027 |        |
| N |            | 48.9064212 | 334.969854 |        |
| N |            | 98.4573993 | 67.0053489 |        |
| N |            | 474.444798 | 211.935804 |        |
| N |            | 24.4705036 | 74.4580586 |        |
| N |            | 186.715368 | 248.426836 |        |
| N |            | 86.1942822 | 256.12057  |        |
| N |            | 7678.70078 | 230.422749 |        |
| N |            | 56.4386734 | 12181.3824 |        |
| N |            | 38.8526944 | 335.699581 |        |
| N |            | 133.906284 | 126.469871 |        |
| N |            | 97.5692219 | 41.9891458 |        |
| N |            | 93.6677149 | 311.807013 |        |
| N |            | 454.895946 | 49944.4659 |        |
| N |            | 3878.80819 | 37.6817115 |        |
| N |            | 1498.24594 | 63.0175977 |        |
| N |            | 148.753308 | 805.42105  |        |
| N |            | 97.2345564 | 3105.0559  |        |

|   |  |            |            |  |
|---|--|------------|------------|--|
| N |  | 35.1962959 | 41.887651  |  |
| N |  | 342.705077 | 736.993519 |  |
| N |  | 74.9602086 | 1181.88692 |  |
| N |  | 10466.3868 | 217.338173 |  |
| N |  | 244.627757 | 218.642432 |  |
| N |  | 6657.55214 | 168.517297 |  |
| N |  | 1950.69076 | 868.44431  |  |
| N |  | 243.10262  | 41436.8676 |  |
| N |  | 70.7471141 | 119983.434 |  |
| N |  | 25.0086458 | 513.864662 |  |
| N |  | 32.8422266 | 108.382005 |  |
| N |  | 8751.86409 | 48.617063  |  |
| N |  | 13.0002021 | 345.695089 |  |
| N |  | 81.6817996 | 21.1277154 |  |
| N |  | 89.3943497 | 760.087818 |  |
| N |  | 19.2910651 | 43.5145593 |  |
| N |  | 542.022649 | 97.1407301 |  |
| N |  | 56.8038674 | 1138.31249 |  |
| N |  | 25.2501241 | 39.553112  |  |
| N |  | 15.3412894 | 1130.81223 |  |
| N |  | 409.512245 | 807.707078 |  |
| N |  | 85.5387875 | 45.6883163 |  |
| N |  | 94.9857247 | 47.178547  |  |
| N |  | 1320.49039 | 249.876674 |  |
| N |  | 850.105466 | 216.410951 |  |
| N |  | 870.332508 | 138.767561 |  |
| N |  | 10844.6384 | 354.732572 |  |
| N |  | 50.4169974 | 1393.50883 |  |
| N |  | 30.4056201 | 760.875281 |  |
| N |  | 182.759851 | 133.984837 |  |
| N |  | 27.0942064 | 9219.23357 |  |
| N |  | 125.559495 | 851.426607 |  |

|   |  |            |            |  |
|---|--|------------|------------|--|
| N |  | 73.5990989 | 71.40651   |  |
| N |  | 63.2793776 | 464.776842 |  |
| N |  | 43467.325  | 259.34355  |  |
| N |  | 178.352393 | 48.4931596 |  |
| N |  | 259.584839 | 47.3192317 |  |
| N |  | 3542.26895 | 173.114529 |  |
| N |  | 11942.267  | 642.999519 |  |
| N |  | 361.170417 | 133.642012 |  |
| N |  | 1326.61003 | 45.2983784 |  |
| N |  | 1695.9136  | 145.319844 |  |
| N |  | 6164.43444 | 8991.45559 |  |
| N |  | 1401.24778 | 207.878546 |  |
| N |  | 77.7418787 | 1107.91321 |  |
| N |  | 678.077138 | 549.148215 |  |
| N |  | 513.919074 | 580.917783 |  |
| N |  | 37203.6166 | 6000.33622 |  |
| N |  | 23.8556666 | 780.872555 |  |
| N |  | 185.436759 | 104.007407 |  |
| N |  | 212.001629 | 611.488252 |  |
| N |  | 583.244004 | 192.254408 |  |
| N |  | 130.851428 | 8116.04896 |  |
| N |  |            | 16.0995991 |  |
| N |  |            | 2411.46719 |  |
| N |  |            | 31.4232517 |  |
| N |  |            | 15.7032826 |  |
| N |  |            | 461.548303 |  |
| N |  |            | 124300.561 |  |
| N |  |            | 43513.7642 |  |
| N |  |            | 117.844127 |  |
| N |  |            | 208.014807 |  |
| N |  |            | 109.942337 |  |
