# Supplementary material
Source: PubMed Central journal article supplement (PMC9675946)
Supplement: NIHMS1845806-supplement-1845806_SD_ED_Fig_3.pdf [file NIHMS1845806-supplement-1845806_SD_ED_Fig_3.pdf]

**Suppl. Fig. 3A\_Data****B2\_2**

| <b>Visit (day)</b> | <b>VL (log)</b> | <b>E484 (%)</b> | <b>484K (%)</b> | <b>484Q (%)</b> |
|--------------------|-----------------|-----------------|-----------------|-----------------|
| 0                  | 5.81            | 94              | 3               | 3               |
| 1                  | 3.57            | 49              | 33              | 18              |
| 2                  | 3.94            | 2               | 98              |                 |
| 3                  | 3.45            | 2               | 76              | 22              |
| 4                  | 4.3             | 32              | 12              | 56              |
| 5                  | 4.9             |                 | 96              | 4               |
| 6                  | 4.27            |                 | 90              | 10              |
| 7                  | 3.56            |                 | 44              | 56              |
| 8                  | 6.55            |                 | 100             |                 |
| 9                  | 5.69            |                 | 85              | 15              |
| 10                 | 5.41            |                 | 98              | 2               |
| 11                 | 6.82            |                 |                 | 100             |
| 12                 | 6.82            |                 |                 | 100             |
| 13                 | 5.07            |                 |                 | 100             |
| 14                 | 3.81            |                 |                 | 100             |
| 21                 | 0               |                 |                 |                 |
| 28                 | 0               |                 |                 |                 |

**Suppl. Fig. 3A\_Model****B2\_2**

| <b>Day</b> | <b>Log10 VL</b>  | <b>Freq: E484</b>    | <b>Freq: 484K</b>  | <b>Freq: 484Q</b>   |
|------------|------------------|----------------------|--------------------|---------------------|
| 0          | 6.05215479446993 | 0.981735253369334    | 0.0182393712855906 | 2.54E-05            |
| 1          | 4.63828180058273 | 0.433125205221985    | 0.565235899398838  | 0.00163889537917674 |
| 2          | 4.47515878033412 | 0.0107271055859312   | 0.983330786550775  | 0.0059421078632934  |
| 3          | 4.55070720704206 | 0.000153348737922758 | 0.987411290637169  | 0.0124353606249079  |
| 4          | 4.63380501192845 | 2.15E-06             | 0.974422185024565  | 0.0255756605648286  |
| 5          | 4.72302862366056 | 2.98E-08             | 0.948135549898025  | 0.0518644202583931  |
| 6          | 4.82413252090109 | 4.02E-10             | 0.897663181286679  | 0.102336818311074   |
| 7          | 4.94717147414437 | 5.15E-12             | 0.808018563371151  | 0.191981436623694   |
| 8          | 5.10663125133181 | 6.07E-14             | 0.668818750718759  | 0.331181249281181   |
| 9          | 5.31720875245549 | 6.36E-16             | 0.492127708842984  | 0.507872291157015   |
| 10         | 5.58505160653057 | 5.84E-18             | 0.317381671750399  | 0.682618328249601   |
| 11         | 5.90295504828994 | 4.78E-20             | 0.182400187638102  | 0.817599812361898   |
| 12         | 6.2559272614756  | 3.61E-22             | 0.0966940935966751 | 0.903305906403325   |

| <b>Suppl. Fig. 3B_Data</b> |                 |                 |                 |
|----------------------------|-----------------|-----------------|-----------------|
| <b>B2_3</b>                |                 |                 |                 |
| <b>Visit (day)</b>         | <b>VL (log)</b> | <b>E484 (%)</b> | <b>484K (%)</b> |
| 0                          | 7.34            | 100             |                 |
| 1                          | 7.52            | 100             |                 |
| 2                          | 5.28            | 100             |                 |
| 3                          | 4.22            | 92              | 8               |
| 4                          | 5.76            | 2               | 98              |
| 5                          | 6.77            | 2               | 98              |
|                            |                 |                 |                 |
| 7                          | 7.77            |                 | 100             |
| 8                          | 6.85            |                 | 100             |
| 9                          | 6.73            |                 | 100             |
| 10                         | 5.72            | 3               | 97              |
| 11                         | 4.15            |                 | 100             |
| 12                         | 3.45            |                 | 100             |
| 13                         | 1               |                 |                 |
| 14                         | 0               |                 |                 |
| 21                         | 0               |                 |                 |
| 28                         | 0               |                 |                 |

| <b>Suppl. Fig. 3B_Model</b> |                  |                     |                     |
|-----------------------------|------------------|---------------------|---------------------|
| <b>B2_3</b>                 |                  |                     |                     |
| <b>Day</b>                  | <b>Log10 VL</b>  | <b>Freq: E484</b>   | <b>Freq: 484K</b>   |
| 0                           | 7.8942462810401  | 0.999999            | 1.55E-07            |
| 1                           | 6.65847105731271 | 0.999970588758192   | 2.94E-05            |
| 2                           | 5.4250940598878  | 0.994434754768019   | 0.00556524523198065 |
| 3                           | 4.50177168189706 | 0.484295844100539   | 0.515704155899461   |
| 4                           | 5.25990443407993 | 0.00491122759002316 | 0.995088772409977   |
| 5                           | 6.30137147207933 | 2.59E-05            | 0.999974062083238   |
| 7                           | 8.38854810162729 | 7.16E-10            | 0.999999            |
|                             |                  |                     |                     |

| <b>Suppl. Fig. 3C_Data</b> |                 |                 |                 |
|----------------------------|-----------------|-----------------|-----------------|
| <b>B2_5</b>                |                 |                 |                 |
| <b>Visit (day)</b>         | <b>VL (log)</b> | <b>E484 (%)</b> | <b>484Q (%)</b> |
| 0                          | 6.61            | 100             |                 |
| 1                          | 7.33            | 100             |                 |
| 2                          | 5.14            | 100             |                 |
| 3                          | 5.94            | 100             |                 |
| 4                          | 3.88            | 26              | 74              |
| 5                          | 3.99            | 2               | 98              |
| 6                          | 4.22            |                 | 100             |
| 7                          | 3.37            |                 | 100             |
|                            |                 |                 |                 |
| 9                          | 3.55            |                 | 100             |
| 10                         | 2.57            |                 | 100             |
| 11                         | 2.28            |                 | 100             |
| 12                         | 4.16            |                 | 100             |
| 13                         | 2.99            |                 | 100             |
| 14                         | 2.36            |                 | 100             |
| 21                         | 0               |                 |                 |
| 28                         | 0               |                 |                 |

| <b>Suppl. Fig. 3C_Model</b> |                 |                   |                   |
|-----------------------------|-----------------|-------------------|-------------------|
| <b>B2_5</b>                 |                 |                   |                   |
| <b>Day</b>                  | <b>Log10 VL</b> | <b>Freq: E484</b> | <b>Freq: 484Q</b> |
| 0                           | 7.85135617      | 0.9996168         | 0.0003832         |
| 1                           | 6.76720038      | 0.99644857        | 0.00355143        |
| 2                           | 5.69427841      | 0.96792656        | 0.03207344        |
| 3                           | 4.71121944      | 0.76448139        | 0.23551861        |
| 4                           | 4.09611901      | 0.2587813         | 0.7412187         |
| 5                           | 3.86489588      | 0.03619275        | 0.96380725        |
| 6                           | 3.73345735      | 0.00402277        | 0.99597723        |
| 7                           | 3.61471608      | 0.00043424        | 0.99956576        |
| 9                           | 3.38017102      | 5.03E-06          | 0.99999497        |
| 10                          | 3.26298977      | 5.41E-07          | 0.999999          |
| 11                          | 3.14581025      | 5.81E-08          | 0.999999          |
| 12                          | 3.02863092      | 6.25E-09          | 0.999999          |

| Suppl. Fig. 3D_Data |          |          |          |
|---------------------|----------|----------|----------|
| B2_6                |          |          |          |
| Visit (day)         | VL (log) | E484 (%) | 484K (%) |
| 0                   | 6.76     | 100      |          |
| 1                   | 5.61     | 100      |          |
| 2                   | 7.24     | 100      |          |
| 3                   | 4.62     | 93       | 4        |
| 4                   | 6.7      |          | 100      |
| 5                   | 7        |          | 98       |
| 6                   | 5.46     | 56       | 42       |
| 7                   | 6.65     |          | 90       |
| 8                   | 6.78     |          | 97       |
| 9                   | 6.35     |          | 96       |
| 10                  | 5.52     |          | 100      |
| 11                  | 5.41     |          | 88       |
| 12                  | 4.16     |          | 100      |
| 13                  | 5.26     |          | 97       |
| 14                  | 3.7      |          | 84       |
| 21                  | 0        |          |          |
| 28                  | 0        |          |          |

**Suppl. Fig. 3D\_Model****B2\_6**

| <b>Day</b> | <b>Log10 VL</b>  | <b>Freq: E484</b>    | <b>Freq: 484K</b>  |
|------------|------------------|----------------------|--------------------|
| 0          | 7.4967609620738  | 0.987606952314732    | 0.0123917242612716 |
| 1          | 6.97911767963277 | 0.951261479637875    | 0.0487307133481105 |
| 2          | 6.50598835584732 | 0.826992792230871    | 0.172965639977324  |
| 3          | 6.15772391014776 | 0.539310231984218    | 0.460523746615944  |
| 4          | 6.00770885057986 | 0.22280565497486     | 0.776774274893965  |
| 5          | 6.00484768178894 | 0.065593358477067    | 0.933649240926728  |
| 6          | 6.05998802596847 | 0.0168963156271053   | 0.981908794253527  |
| 7          | 6.13170223324911 | 0.00418938522009642  | 0.99399611702946   |
| 8          | 6.20774915773543 | 0.00102843266344803  | 0.996243518245914  |
| 9          | 6.28503206762191 | 0.000251747659448009 | 0.995658359373116  |
| 10         | 6.36286476717281 | 6.15E-05             | 0.993814640316744  |



| <b>Suppl. Fig. 3E_Data</b> |                 |                 |                 |
|----------------------------|-----------------|-----------------|-----------------|
| <b>B2_7</b>                |                 |                 |                 |
| <b>Visit (day)</b>         | <b>VL (log)</b> | <b>E484 (%)</b> | <b>484K (%)</b> |
| 0                          | 7.29            | 100             |                 |
| 1                          | 5.33            | 100             |                 |
| 2                          | 7.01            | 100             |                 |
| 3                          | 6.43            | 100             |                 |
| 4                          | 4.16            | 100             |                 |
| 5                          | 3.62            | 100             |                 |
| 6                          | 2.59            | 8               | 92              |
| 7                          | 4.97            | 2               | 98              |
| 10                         | 6.61            | 34              | 66              |
| 11                         | 7.74            | 14              | 86              |
| 12                         | 7.51            |                 | 100             |
| 13                         | 6.86            |                 | 100             |
| 14                         | 4.59            |                 | 100             |
| 28                         | 1               |                 |                 |

| <b>Suppl. Fig. 3E_Model</b> |                 |                   |                   |
|-----------------------------|-----------------|-------------------|-------------------|
| <b>B2_7</b>                 |                 |                   |                   |
| <b>Day</b>                  | <b>Log10 VL</b> | <b>Freq: E484</b> | <b>Freq: 484K</b> |
| 0                           | 7.53015388      | 0.999999          | 2.95E-08          |
| 1                           | 6.7969621       | 0.999999          | 7.09E-07          |
| 2                           | 6.06377713      | 0.99998294        | 1.71E-05          |
| 3                           | 5.33075571      | 0.99959008        | 0.00040992        |
| 4                           | 4.60164689      | 0.99023593        | 0.00976407        |
| 5                           | 3.95659296      | 0.80835203        | 0.19164797        |
| 6                           | 3.95711053      | 0.14924194        | 0.85075806        |
| 7                           | 4.53789307      | 0.00724296        | 0.99275704        |
| 10                          | 6.47819457      | 5.25E-07          | 0.999999          |
| 11                          | 7.12601379      | 2.18E-08          | 0.999999          |
| 12                          | 7.77383321      | 9.08E-10          | 0.999999          |

| Suppl. Fig. 3F_Data |          |          |          |
|---------------------|----------|----------|----------|
| B2_8                |          |          |          |
| Visit (day)         | VL (log) | E484 (%) | 484K (%) |
| 0                   | 5.89     | 100      |          |
| 1                   | 6.83     | 100      |          |
| 2                   | 4.65     | 100      |          |
| 3                   | 2.46     | 100      |          |
| 4                   | 3.06     | 58       | 42       |
| 5                   | 3.85     |          | 100      |
| 6                   | 4.53     |          | 100      |
| 7                   | 2.05     |          | 100      |
| 8                   | 3.42     |          | 100      |
| 9                   | 5.77     |          | 100      |
| 10                  | 4.81     |          | 100      |
| 11                  | 5.08     |          | 100      |
| 12                  | 4.61     |          | 100      |
| 13                  | 3.89     |          | 100      |
| 14                  | 2.74     |          | 100      |

**Suppl. Fig. 3F\_Model****B2\_8**

| <b>Day</b> | <b>Log10 VL</b>  | <b>Freq: E484</b>   | <b>Freq: 484K</b>    |
|------------|------------------|---------------------|----------------------|
| 0          | 7.0827536637062  | 0.999995512156373   | 4.49E-06             |
| 1          | 5.7813525105515  | 0.999825521368964   | 0.000174478631035698 |
| 2          | 4.48273879305916 | 0.993260008662076   | 0.00673999133792438  |
| 3          | 3.28002597508332 | 0.79122642302358    | 0.20877357697642     |
| 4          | 2.92839540205707 | 0.0888088751440023  | 0.911191124855998    |
| 5          | 3.17739545805595 | 0.00250023786153395 | 0.997499762138466    |
| 6          | 3.46463962836648 | 6.45E-05            | 0.999935544175023    |
| 7          | 3.75291573039557 | 1.66E-06            | 0.999998342280357    |
| 8          | 4.04121840477253 | 4.26E-08            | 0.999999             |
| 9          | 4.32952176253523 | 1.10E-09            | 0.999999             |
| 10         | 4.61782513787264 | 2.82E-11            | 0.999999             |
| 11         | 4.90612851366201 | 7.25E-13            | 0.999999             |
| 12         | 5.19443188946301 | 1.86E-14            | 0.999999             |

| Suppl. Fig. 3G_Data |      |      |
|---------------------|------|------|
| Growth rate (/day)  |      |      |
| ID                  | E484 | 484K |
| B2_2                | -4.1 | 0.2  |
| B2_3                | -2.8 | 2.4  |
| B2_6                | -1.2 | 0.2  |
| B2_7                | -1.7 | 1.5  |
| B2_8                | -3   | 0.7  |
|                     |      |      |
|                     |      |      |
|                     |      |      |
