# Supplementary material
Source: PubMed Central journal article supplement (PMC9675946)
Supplement: NIHMS1845806-supplement-1845806_SD_ED_Fig_4.pdf [file NIHMS1845806-supplement-1845806_SD_ED_Fig_4.pdf]

ExtendedFigure4

| Grp1 (n=7) | Grp2 (n=31) | Grp3 (n=28) |
|------------|-------------|-------------|
| 2          | 1           | 1           |
| 3          | 2           | 1           |
| 1          | 9           | 1           |
| 8          | 1           | 2           |
| 7          | 7           | 7           |
| 3          | 1           | 1           |
| 0          | 8           | 7           |
|            | 1           | 1           |
|            | 1           | 4           |
|            | 1           | 17          |
|            | 1           | 3           |
|            | 12          | 7           |
|            | 9           | 2           |
|            | 17          | 6           |
|            | 2           | 1           |
|            | 2           | 15          |
|            | 10          | 2           |
|            | 5           | 3           |
|            | 9           | 5           |
|            | 4           | 1           |
|            | 5           | 1           |
|            | 4           | 7           |
|            | 1           | 1           |
|            | 0           | 5           |
|            | 6           | 2           |
|            | 1           | 12          |
|            | 2           | 5           |
|            | 16          | 1           |
|            | 4           |             |
|            | 1           |             |
|            | 10          |             |
