# Supplementary material
Source: PubMed Central journal article supplement (PMC9675946)
Supplement: NIHMS1845806-supplement-1845806_SD_Fig_1.pdf [file NIHMS1845806-supplement-1845806_SD_Fig_1.pdf]

### Baseline mutation 7000mg & 700m

|  |        |                       | No mutation | Mutation |   |                |
|--|--------|-----------------------|-------------|----------|---|----------------|
|  | 7000mg | Placebo 0/46 (0%)     | 100         | 0        | } |                |
|  |        | Treatment 0/48 (0%)   | 100         | 0        |   |                |
|  |        |                       |             |          |   | Baseline       |
|  | 700mg  | Placebo 2/112 (2%)    | 98          | 2        | } |                |
|  |        | Treatment 3/111 (3%)  | 97          | 3        |   |                |
|  |        |                       |             |          |   |                |
|  | 7000mg | Placebo 0/46 (0%)     | 100         | 0        | } |                |
|  |        | Treatment 0/48 (0%)   | 100         | 0        |   |                |
|  |        |                       |             |          |   | Emergent       |
|  | 700mg  | Placebo 0/112 (0%)    | 100         | 0        | } |                |
|  |        | Treatment 8/111 (7%)  | 93          | 7        |   |                |
|  |        |                       |             |          |   |                |
|  | 7000mg | Placebo 0/46 (0%)     | 100         | 0        | } |                |
|  |        | Treatment 0/48 (0%)   | 100         | 0        |   |                |
|  |        |                       |             |          |   | Any time-point |
|  | 700mg  | Placebo 2/112 (2%)    | 98          | 2        | } |                |
|  |        | Treatment 10/111 (9%) | 91          | 9        |   |                |
