# Supplementary material
Source: PubMed Central journal article supplement (PMC9675946)
Supplement: NIHMS1845806-supplement-1845806_SD_Fig_2.pdf [file NIHMS1845806-supplement-1845806_SD_Fig_2.pdf]

Figure 2a

| Visit Day | 0    | 3    | 7    | 14   | 21   | 28   |
|-----------|------|------|------|------|------|------|
|           | 1    | 0    | 1    | 4.27 | 2.07 | 1    |
|           | 6.72 | 5.93 | 6.03 | 2.21 | 1    | 0    |
|           | 7.97 | 6.97 | 2.92 | 1    | 1    | 0    |
|           | 7.6  | 6.39 | 3.28 | 6.62 | 0    | 0    |
|           | 7.7  | 5.44 | 4.94 | 6.22 |      | 1    |
|           | 8.08 | 7    | 7.13 | 4.56 | 2.18 | 0    |
|           |      | 6.87 | 3.61 |      | 0    |      |
|           | 6.44 | 4.91 | 4.95 | 2.38 | 0    | 1    |
|           | 5.31 | 2.31 | 0    | 2    | 0    | 0    |
|           | 5.6  | 2.51 | 3.21 |      | 1    | 0    |
|           | 3.82 | 3.11 | 0    | 4.55 | 1    | 4.04 |
|           | 3.75 | 2.49 | 2.38 | 1    | 2.15 | 0    |
|           | 6.23 | 5.01 | 2.82 | 0    | 0    | 1    |
|           | 7.76 | 4.74 | 2.95 | 1    | 0    | 0    |
|           | 7.27 | 2.58 | 2.91 | 0    | 0    | 0    |
|           | 8.45 | 4.67 | 1    | 1    | 0    | 0    |
|           | 7.13 | 2.64 | 1    | 1    | 0    | 0    |
|           | 4.29 | 1    | 2.11 | 1    | 0    | 0    |
|           | 4.21 | 2.49 | 1    | 1    | 0    | 0    |
|           | 6    | 2.47 | 3.83 | 0    | 3.3  | 0    |
|           | 2.55 | 2.52 | 2.27 | 0    | 0    | 1    |
|           | 7.62 | 6.15 | 4.52 | 0    | 2.51 | 1    |
|           | 7.62 | 4.35 | 1    | 0    | 1    | 1    |
|           | 6.41 | 2.65 | 3.48 | 1    | 0    | 0    |
|           | 8.3  | 5.14 | 2.43 | 2.65 | 0    | 1    |
|           | 7    | 4.93 | 0    | 0    | 2.73 | 0    |
|           | 0    | 0    | 1    | 1    | 0    | 1    |
|           | 6.68 | 3.11 | 2.67 | 1    | 1    | 0    |
|           | 5.42 | 1    | 3.02 | 1    | 0    | 0    |

|  |      |      |      |      |      |      |
|--|------|------|------|------|------|------|
|  | 6.17 | 3.03 | 1    | 0    | 0    | 0    |
|  | 6.36 | 3.51 | 2.28 | 2.39 | 0    | 1    |
|  | 5.4  | 3.23 | 2.75 | 1    | 0    | 1    |
|  | 7.98 | 3.81 | 1    | 1    | 2.44 | 1    |
|  | 6.27 | 2.85 | 0    | 0    | 1    | 0    |
|  | 6    | 6.68 | 2.78 | 2.87 | 0    | 0    |
|  | 5.49 | 1    | 3.59 | 1    | 0    | 0    |
|  | 6.77 | 0    | 0    | 0    | 0    | 0    |
|  | 7.53 | 5.3  | 0    | 0    | 0    | 0    |
|  | 4.95 | 3.3  | 2.03 | 0    | 1    | 0    |
|  | 0    | 3.94 | 1    | 1    | 0    | 0    |
|  | 7.98 | 2.37 | 1    | 1    | 1    | 1    |
|  | 5.58 | 3.05 | 2.78 | 1    | 1    | 0    |
|  | 6.9  | 1    | 1    | 0    | 0    | 0    |
|  | 3.84 | 3.55 | 3.42 | 1    | 0    | 0    |
|  | 4.01 | 1    | 1    | 2.59 | 0    | 0    |
|  | 6.31 | 5.8  | 1    | 0    | 0    | 1    |
|  | 3.52 | 1    | 2.89 | 1    | 0    | 0    |
|  | 6.87 | 3.47 | 1    | 3.39 | 0    | 0    |
|  | 3.84 | 3.16 | 2.25 | 0    | 0    | 0    |
|  | 6.7  | 1    | 1    | 1    | 0    | 0    |
|  | 5.79 | 4.77 | 2.12 | 1    | 0    | 2.06 |
|  | 3.94 | 2.42 | 3.01 | 1    | 3.62 | 1    |
|  | 4.85 | 2.29 | 1    | 3.01 | 2.43 | 0    |
|  | 5.82 | 3.05 | 4.24 | 2.09 | 0    | 0    |
|  | 2.08 | 2.26 | 2.96 | 1    | 2.19 | 0    |
|  | 8.44 | 1    | 1    | 1    | 0    | 1    |
|  | 3.82 | 3.22 | 2.38 | 0    | 3.17 | 1    |
|  | 5.3  | 0    | 4.35 | 1    | 0    | 0    |
|  | 4.29 | 1    | 3.18 | 1    | 0    | 0    |
|  | 3.48 | 2.65 | 3.12 | 0    | 0    | 0    |
|  | 3.12 | 2.5  | 0    | 0    | 2.82 | 0    |

|  |      |      |      |      |      |      |
|--|------|------|------|------|------|------|
|  | 3.96 | 2.91 | 1    | 0    | 0    | 0    |
|  | 6.42 | 1    | 1    | 0    | 1    | 1    |
|  | 0    | 8.65 | 1    | 1    | 0    | 0    |
|  | 1    | 2.52 | 2.35 | 0    | 0    | 0    |
|  | 4.67 | 1    | 3.21 | 1    | 1    | 0    |
|  | 4.92 | 2.28 | 3.81 | 0    | 0    | 0    |
|  | 5.14 | 2.78 | 0    | 1    | 0    | 0    |
|  | 2.68 | 2.82 | 2.08 | 0    | 0    | 0    |
|  | 8.37 | 1    | 1    | 0    | 0    | 0    |
|  | 5.44 | 1    | 1    | 0    | 1    | 0    |
|  | 1    | 0    | 1    | 0    | 0    | 1    |
|  | 3.52 | 3.45 | 1    | 0    | 2.42 | 0    |
|  | 4.52 | 4.65 | 1    | 0    | 0    | 0    |
|  | 5.56 | 0    | 3.7  | 3.44 | 0    | 2.22 |
|  | 5.33 | 1    | 1    | 1    | 1    | 1    |
|  | 6.55 | 2.53 | 0    | 0    | 1    | 0    |
|  | 1    | 2.47 | 1    | 1    | 1    | 0    |
|  | 3.59 | 2.11 | 1    | 2.64 | 0    | 0    |
|  | 6.03 | 5.48 | 2.09 | 0    | 0    | 0    |
|  | 3.29 | 5.23 | 2.06 | 2.54 | 0    | 1    |
|  | 1    | 2.98 | 2.86 | 2.36 | 1    | 0    |
|  | 4.9  | 2.92 | 1    | 0    | 0    | 0    |
|  | 4.41 | 1    | 2.18 | 1    | 0    | 0    |
|  | 5.82 | 4.25 | 1    | 1    | 0    | 0    |
|  | 8    | 0    | 1    | 1    | 2.48 | 0    |
|  | 8.48 | 3.29 | 0    | 0    | 0    | 0    |
|  | 3.23 | 0    | 1    | 1    | 1    | 1    |
|  | 4.12 | 1    | 0    | 0    | 0    | 0    |
|  | 6.02 | 3.74 | 1    | 0    | 1    | 1    |
|  | 6.07 | 2.48 | 2.25 | 1    | 3.22 | 0    |
|  | 0    | 3.56 | 2.16 | 1    | 0    | 0    |
|  | 4.73 | 3.18 | 3.06 | 2.2  | 0    | 0    |

|  |      |      |      |      |   |      |
|--|------|------|------|------|---|------|
|  | 0    | 2.92 | 2.42 | 1    | 1 | 0    |
|  | 3.88 | 2.49 | 3.66 | 1    | 0 | 0    |
|  | 6.96 | 1    | 0    | 1    | 0 | 0    |
|  | 6.67 | 1    | 1    | 0    | 0 | 0    |
|  | 5.44 | 3.67 | 1    | 0    | 1 | 0    |
|  | 4.66 | 6.24 | 2.38 | 1    | 0 | 0    |
|  | 5.87 | 3.82 | 3.49 | 1    | 0 |      |
|  | 5.4  | 5.38 | 1    | 0    | 1 |      |
|  | 6.83 | 3.36 | 4.37 | 2.09 |   |      |
|  | 5.82 | 3.85 | 0    | 0    |   |      |
|  | 4.25 |      | 3    | 2.23 |   |      |
|  | 5.48 |      |      |      |   |      |
|  | 8.87 |      |      |      |   |      |
|  | 8.23 |      |      |      |   |      |
|  | 8.51 |      |      |      |   |      |
|  | 5.07 |      |      |      |   |      |
|  | 6.9  |      |      |      |   |      |
|  | 6.31 | 1    | 2.61 | 1    | 1 | 0    |
|  | 0    | 2.73 | 3.06 | 1    | 1 | 0    |
|  | 3.95 | 4.76 | 1    | 3.24 | 1 | 0    |
|  | 4.38 | 3.72 | 2.68 | 0    | 0 | 0    |
|  | 6.02 | 5.07 | 2.47 | 0    | 0 | 0    |
|  | 5.94 | 7.83 | 5.22 | 1    | 0 | 0    |
|  | 5.71 | 4.6  | 2.66 | 1    | 1 | 0    |
|  | 6.49 | 4.03 | 3.3  | 1    | 0 | 1    |
|  | 4.91 | 2.42 | 1    | 0    | 0 | 0    |
|  | 2.16 | 1    | 1    | 0    | 0 | 0    |
|  | 2.89 | 1    | 1    | 0    | 0 | 0    |
|  | 5.4  | 2.28 | 0    | 1    | 0 | 0    |
|  | 7.43 | 6.05 | 3.73 | 1    | 1 | 2.16 |
|  | 4.84 | 3.41 | 1    | 1    | 0 | 1    |
|  | 3.77 | 8.32 | 1    | 1    | 1 | 1    |

|  |      |      |      |      |      |      |
|--|------|------|------|------|------|------|
|  | 7.96 | 4.93 | 5.52 | 1    | 1    | 1    |
|  | 5.79 | 5.76 | 2.58 | 0    | 0    | 0    |
|  | 7.43 | 0    | 3.41 | 2.94 | 1    | 0    |
|  | 6.73 | 4.28 | 0    | 1    | 0    | 2.52 |
|  | 0    | 1    | 2.54 | 1    | 1    | 1    |
|  | 6.91 | 4.52 | 1    | 0    | 0    | 0    |
|  | 3.12 | 5.69 | 2.02 | 1    | 0    | 0    |
|  | 6.4  | 0    | 1    | 2.5  | 1    | 0    |
|  | 7.87 | 5.7  | 0    | 1    | 1    | 1    |
|  | 0    | 4.97 | 5.09 | 1    | 1    | 3.14 |
|  | 6.73 | 5.03 | 2.49 | 0    | 0    | 0    |
|  | 5.99 | 2.73 | 3.52 | 1    | 0    | 0    |
|  | 7.64 | 4.33 | 0    | 1    | 0    | 0    |
|  | 5.16 | 5.54 | 1    | 1    | 1    | 0    |
|  | 6.02 | 8.15 | 3.61 | 1    | 2.16 | 1    |
|  | 6.22 | 4.7  | 4.82 | 3.14 | 0    | 2.37 |
|  | 8.23 | 2.36 | 3.29 | 0    | 1    | 0    |
|  | 4.11 | 4.63 | 0    | 0    | 0    | 0    |
|  | 4.11 | 1    | 1    | 0    | 0    | 1    |
|  | 6.36 | 0    | 3.07 | 0    | 2.45 | 0    |
|  | 3.58 | 2.3  | 0    | 0    | 2.77 | 0    |
|  | 0    | 4.18 | 0    | 0    | 0    | 0    |
|  | 5.35 | 0    | 2.25 | 0    | 0    | 1    |
|  | 6.8  | 6.82 | 0    | 1    | 0    | 1    |
|  | 1    | 3.97 | 0    | 1    | 0    | 0    |
|  | 7.66 | 3.64 | 0    | 2.18 | 0    | 0    |
|  | 5.71 | 2.84 | 1    | 1    | 1    | 0    |
|  | 6.15 | 2.48 | 2.26 | 1    | 3.31 | 0    |
|  | 5.8  | 5.82 | 5.3  | 1    | 0    | 0    |
|  | 4.24 | 4.5  | 1    | 0    | 0    | 0    |
|  | 6.83 | 3.65 | 1    | 2.07 | 3.47 | 0    |
|  | 6.48 | 3.24 | 2.25 | 4.51 | 0    | 0    |

|  |      |      |      |      |      |      |
|--|------|------|------|------|------|------|
|  | 5.87 | 0    | 0    | 0    | 0    | 0    |
|  | 5.7  | 3.57 | 1    | 1    | 2.05 | 0    |
|  | 0    | 4.97 | 1    | 1    | 0    | 1    |
|  | 3.7  | 0    | 3.8  | 1    | 1    | 1    |
|  | 6.28 | 2.21 | 0    | 1    | 0    | 0    |
|  | 8.23 | 2.01 | 0    | 1    | 1    | 0    |
|  | 0    | 4.08 | 1    | 0    | 0    | 0    |
|  | 4.79 | 3.28 | 1    | 1    | 1    | 0    |
|  | 1    | 5.18 | 1    | 0    | 1    | 0    |
|  | 5.36 | 5.6  | 0    | 1    | 2.51 | 0    |
|  | 3.49 | 2.81 | 1    | 1    | 2.7  | 0    |
|  | 8.06 | 3.51 | 1    | 1    | 1    | 1    |
|  | 6.94 | 2.66 | 2.28 | 1    | 0    | 1    |
|  | 4.06 | 3.41 | 1    | 2    | 0    | 0    |
|  | 4.21 | 2.6  | 1    | 2.67 | 0    | 1    |
|  | 3.58 | 3.17 | 1    | 0    | 0    | 1    |
|  | 1    | 4.84 | 3.02 | 0    | 1    | 0    |
|  | 2.15 | 4.5  | 2.98 | 0    | 1    | 1    |
|  | 3.24 | 5.79 | 2.73 | 1    | 1    | 1    |
|  | 7.79 | 6.18 | 2.69 | 0    | 0    | 0    |
|  | 6.14 | 2.3  | 1    | 0    | 0    | 0    |
|  | 7.2  | 6.56 | 1    | 0    | 2.76 | 0    |
|  | 7.65 | 5.92 | 2.61 | 1    | 0    | 0    |
|  | 2.51 | 1    | 1    | 1    | 1    | 1    |
|  | 6.13 | 3.42 | 1    | 1    | 0    | 0    |
|  | 6.36 | 2.28 | 4.11 | 1    | 0    | 0    |
|  | 2.94 | 4.46 | 3.18 | 0    | 0    | 2.45 |
|  | 5.71 | 2.89 | 3.08 | 2.1  | 0    | 0    |
|  | 4.9  | 4.81 | 0    | 1    | 1    | 0    |
|  | 7.31 | 1    | 2.74 | 2.33 | 1    | 2.64 |
|  | 5.88 | 6.96 | 1    | 0    | 1    | 0    |
|  | 4.22 | 3.55 | 2.79 | 1    | 0    | 0    |

|  |      |      |      |      |      |      |
|--|------|------|------|------|------|------|
|  | 5.87 | 3.38 | 1    | 2.69 | 1    | 0    |
|  | 3.46 | 6.95 | 4.28 | 1    | 0    | 0    |
|  | 6.6  | 4.89 | 1    | 2.59 | 1    | 0    |
|  | 4.57 | 4.38 | 3.61 | 1    | 1    | 2.48 |
|  | 8.71 | 4.3  | 4.97 | 3.29 | 2.25 | 1    |
|  | 6.81 | 5.42 | 4.64 | 1    | 1    | 5.58 |
|  | 8.71 | 3.81 | 2.34 | 0    | 2.17 | 0    |
|  | 7.08 | 1    | 2.81 | 0    | 1    | 0    |
|  | 6.25 | 4.63 | 3.36 | 2.16 | 0    | 0    |
|  | 7.64 | 5.59 | 1    | 1    | 1    | 2.7  |
|  | 6.71 | 3.66 | 5.78 | 2.24 | 0    | 1    |
|  | 5.24 | 7.29 | 1    | 2.02 | 1    | 0    |
|  | 7.75 | 3.46 | 0    | 2.34 | 0    | 0    |
|  | 7.67 | 1    | 2.48 | 1    | 1    | 1    |
|  | 5.44 | 1    | 3.33 | 3.23 | 0    | 1    |
|  | 6.93 | 3.44 | 0    | 1    | 0    | 0    |
|  | 8.31 | 6.19 | 3.45 | 1    | 0    | 0    |
|  | 5.97 | 7.11 | 4.14 | 1    | 0    | 1    |
|  | 1    | 4.72 | 2.24 | 0    | 0    | 2.25 |
|  | 0    | 5.04 | 3.46 | 0    | 1    | 1    |
|  | 2.91 | 3.01 | 2.03 | 0    | 0    | 1    |
|  | 5.17 | 1    | 0    |      | 1    | 1    |
|  | 2.96 | 5.37 | 3.66 |      | 1    | 1    |
|  | 6.52 | 0    | 2.33 |      | 0    | 0    |
|  | 8.22 | 3.87 | 2.73 |      | 2.41 | 0    |
|  | 7.91 | 2.03 | 2.07 |      | 0    | 0    |
|  | 7.18 | 6.67 | 2.45 |      | 0    | 1    |
|  | 3.72 |      |      |      | 2.35 | 0    |
|  | 3.99 |      |      |      |      | 0    |
|  | 5.21 |      |      |      |      |      |
|  | 3.32 |      |      |      |      |      |
|  | 3.17 |      |      |      |      |      |

|  |      |  |  |  |  |  |
|--|------|--|--|--|--|--|
|  | 4.52 |  |  |  |  |  |
|  | 6.27 |  |  |  |  |  |



Figure 2b

| Visit Day | 0    | 1    | 2    | 3    | 4    | 5    | 6    | 7    | 8    | 9    | 10   | 11   | 12   | 13   | 14   | 21   | 28 |
|-----------|------|------|------|------|------|------|------|------|------|------|------|------|------|------|------|------|----|
|           | 4.73 | 0    | 2.08 | 0    | 0    | 1    | 0    | 1    | 3.51 | 0    | 5.2  | 4.27 | 3.6  | 3.27 | 1    | 2.25 | 0  |
|           | 5.81 | 3.57 | 3.94 | 3.45 | 4.3  | 4.9  | 4.27 | 3.56 | 6.55 | 5.69 | 5.41 | 6.82 | 6.82 | 5.07 | 3.81 | 0    | 0  |
|           | 7.34 | 7.52 | 5.28 | 4.22 | 5.76 | 6.77 |      | 7.77 | 6.85 | 6.73 | 5.72 | 4.15 | 3.45 | 1    | 0    | 0    | 0  |
|           | 6.61 | 7.33 | 5.14 | 5.94 | 3.88 | 3.99 | 4.22 | 2.85 |      | 3.55 | 2.57 | 2.28 | 4.16 | 2.99 | 2.36 | 0    | 0  |
|           | 5.89 | 6.83 | 4.65 | 2.46 | 3.06 | 3.85 | 4.53 | 2.05 | 3.42 | 5.77 | 4.81 | 5.08 | 4.61 | 3.89 | 2.74 | 0    | 0  |
|           | 7.29 | 7.01 | 6.43 | 5.33 | 4.16 | 3.62 | 2.59 | 4.97 |      |      | 6.61 | 7.74 | 7.51 | 6.86 | 4.59 |      | 1  |
|           | 6.76 | 5.61 | 7.24 | 4.62 | 6.7  | 7    | 5.46 | 6.65 | 6.78 | 6.35 | 5.52 | 5.41 | 4.16 | 5.26 | 3.7  | 0    | 0  |
|           |      | 2.8  | 2.07 | 4.63 | 1    | 1    | 7    | 1    | 0    | 0    | 0    | 0    | 0    | 0    |      | 0    |    |
|           | 2.08 | 1    | 1    | 0    | 0    | 1    | 0    | 0    | 0    | 0    | 0    | 0    | 0    | 1    | 0    | 0    | 0  |
|           | 5.06 | 5.42 | 4.08 | 3.21 | 4.08 | 0    | 2.62 | 1    | 2.9  | 2.2  | 2.37 | 1    | 2.19 | 0    |      | 1    | 0  |
|           | 1    | 2.45 | 1    | 2.12 | 1    | 2.41 | 0    | 0    | 0    | 1    | 0    | 1    | 0    | 1    | 1    | 1    | 1  |
|           | 2.85 | 2.75 | 3.82 | 0    | 0    | 1    | 0    | 1    | 1    | 1    | 1    | 0    | 0    | 0    | 0    | 0    | 0  |
|           | 5.2  | 3.41 | 3.32 | 2.54 | 2.18 | 1    | 0    | 0    | 1    | 1    | 1    | 0    | 1    | 0    | 0    | 0    |    |
|           | 7.87 | 6.16 | 4.24 | 4.68 | 3.98 | 2.34 | 1    | 2.58 |      |      |      |      |      |      |      | 0    | 0  |
|           | 6.25 | 5.64 | 4.97 | 3.51 |      |      |      |      | 0    |      | 1    | 0    | 0    | 0    | 1    | 1    | 0  |
|           | 7.63 | 6.86 | 5.22 | 4.08 | 3.59 | 2.21 | 1    | 1    | 1    | 0    | 0    | 0    | 0    | 0    | 0    | 0    | 0  |
|           | 6.71 | 5.45 | 5.33 | 3.2  | 3.21 | 2.31 | 1    | 1    | 1    | 1    | 1    | 1    | 1    | 0    | 0    | 0    | 1  |
|           | 3.15 | 1    | 1    | 1    | 0    | 0    | 0    | 0    | 0    | 0    | 0    | 0    | 0    | 0    | 0    | 0    | 0  |
|           | 4.94 | 3.67 | 3.8  | 2.7  | 2.18 | 1    | 1    | 0    | 0    | 0    | 0    | 0    | 0    | 0    | 0    |      |    |
|           | 4.07 | 4.49 | 4.04 | 2.97 | 3.62 | 2.45 | 1    | 1    | 0    | 0    | 0    | 1    | 0    | 0    | 0    | 0    | 0  |
|           | 0    | 1    | 0    | 0    | 0    | 1    | 0    | 0    | 0    | 0    | 0    | 0    | 0    | 0    | 0    | 0    | 0  |
|           | 6.82 | 5.73 |      | 5.6  | 1    | 3.91 | 1    | 2.44 | 0    | 1    | 0    | 0    | 0    |      | 0    |      | 0  |
|           | 6.66 | 2.31 | 3.99 | 2.45 | 1    | 0    | 1    | 0    | 0    | 0    | 0    | 0    | 0    |      | 0    | 0    | 0  |
|           | 1    | 2.71 | 1    | 0    | 0    | 0    | 0    | 0    |      |      |      |      | 0    |      | 0    |      |    |
|           | 5.36 | 2.83 | 2.68 | 1    | 2.66 | 2.13 |      | 1    | 1    | 0    | 0    | 0    | 0    | 1    | 0    | 0    | 0  |
|           | 2.64 | 2.81 | 0    | 3.66 | 0    | 0    | 0    | 1    |      | 0    | 0    | 0    | 0    | 0    | 0    | 0    | 0  |
|           | 0    | 0    | 0    | 0    | 0    | 0    | 0    | 0    | 0    | 0    | 0    | 0    | 0    | 0    | 0    | 0    | 0  |
|           | 4.57 | 4.15 | 2.42 | 3.56 | 1    | 1    | 0    | 1    | 1    | 0    | 0    | 1    | 0    | 1    | 1    | 0    | 0  |
|           | 2.38 | 3.62 | 2.18 | 1    | 1    | 2.3  | 1    | 1    | 0    | 0    | 0    | 0    | 0    | 0    | 1    | 0    | 0  |
|           | 5.97 | 4.26 | 2.98 | 2.68 | 0    | 2.5  | 2.34 | 1    | 0    | 0    | 0    | 0    | 1    | 0    | 1    | 0    | 0  |
|           | 6.27 | 4.9  | 3.83 | 2.32 | 0    | 1    | 0    | 1    | 1    | 1    | 0    | 0    | 0    | 0    | 0    | 0    | 0  |
|           | 1    | 0    | 0    | 0    | 0    | 0    | 0    | 0    | 0    | 0    | 0    | 0    | 0    | 0    | 0    | 0    | 0  |
|           | 5.77 | 6.03 | 4.5  | 5.5  | 5.82 | 4.1  | 4.33 | 2.98 | 2.25 | 1    | 1    | 1    | 1    | 0    | 0    | 0    | 1  |
|           | 5.02 | 4.21 | 2.93 | 3.09 | 0    | 3.21 | 0    | 0    |      |      | 0    | 0    | 0    | 0    | 1    | 0    | 0  |
|           | 7.4  |      |      |      |      |      |      |      |      |      |      |      |      |      |      |      |    |
|           | 6.06 | 3.8  | 3.68 | 2.01 | 2.69 | 2.47 | 2.04 | 1    | 1    | 0    | 1    | 1    | 1    | 0    | 1    | 0    | 0  |
|           | 4.49 | 2.73 | 2.26 |      | 0    | 0    | 0    | 1    | 0    | 0    | 0    | 0    | 0    | 0    | 0    | 0    | 0  |
|           | 6.8  | 4.69 | 4.73 | 3.99 | 3.16 | 2.46 | 2.71 | 1    | 2.65 | 0    | 0    | 0    | 0    | 0    | 0    | 0    | 0  |
|           | 3.19 | 3.07 | 1    | 1    | 1    | 0    | 0    | 1    | 0    | 0    | 0    | 0    | 0    | 0    |      | 0    | 0  |
|           | 0    | 0    | 0    | 0    | 0    | 0    | 0    | 0    | 0    | 0    | 0    | 0    | 0    | 0    | 0    | 0    | 0  |
|           | 7    |      | 5.41 | 5.21 | 2.75 | 2.12 | 0    | 0    | 1    | 0    | 0    | 0    | 0    | 0    | 0    | 0    | 1  |
|           | 6.85 | 4.68 | 2.91 | 2.31 | 1    | 1    | 1    | 0    | 1    | 1    | 0    | 1    | 1    | 0    | 1    | 0    | 0  |
|           | 4.17 | 0    | 3.63 | 1    | 0    | 0    | 1    | 0    | 0    | 0    | 0    | 0    | 0    | 1    | 0    | 0    | 0  |
|           | 4.02 | 3.94 | 4.2  | 2.98 | 2.55 | 2.58 | 3.22 | 1    | 3.04 |      | 0    | 1    | 1    | 0    | 1    | 1    | 0  |
|           | 3.58 | 1    | 0    | 1    | 0    | 0    | 0    | 0    | 1    | 0    | 0    | 0    | 0    | 0    | 0    | 0    | 0  |
|           | 4.64 | 3.41 | 1    | 3.21 | 0    | 0    | 0    | 0    | 1    | 0    | 0    | 0    | 0    | 0    | 1    | 0    | 0  |
|           | 0    | 0    | 0    | 0    | 0    | 0    |      | 0    | 0    | 0    | 0    | 0    | 0    | 0    | 0    | 0    | 0  |
|           | 5.87 | 4.2  | 3.63 | 4.54 | 1    | 1    | 0    | 1    | 1    | 1    | 0    | 0    | 0    | 1    | 0    | 0    | 0  |
|           | 0    | 1    | 0    | 1    | 1    | 1    | 1    | 0    | 0    | 1    | 1    | 0    | 0    | 1    | 0    | 0    | 0  |
|           | 4.11 | 4.32 | 4.55 | 5.6  | 1    | 1    | 0    | 0    | 0    | 0    | 1    | 0    | 0    | 0    | 0    | 0    | 0  |
|           | 5.73 | 1    | 2.69 | 3.02 | 1    | 1    | 1    | 0    | 1    | 0    | 0    | 1    |      | 0    | 1    | 0    | 0  |
|           | 3.92 | 3.63 | 1    | 1    | 0    | 0    | 0    | 0    | 0    | 0    | 0    | 0    | 1    | 0    | 0    | 0    | 0  |
|           | 4.16 | 2.41 | 3.38 | 2.9  | 1    | 1    | 3.27 | 2.81 | 4.16 | 3.36 | 0    | 1    | 0    | 1    | 1    | 0    | 0  |
|           | 4.86 | 4.5  | 3.21 | 2.8  | 0    | 1    | 1    | 1    | 0    | 1    | 0    | 0    | 0    |      | 0    | 0    | 0  |
|           | 0    | 1    | 0    | 1    | 0    | 0    | 0    | 0    | 0    | 0    | 0    | 0    | 0    | 0    | 0    | 0    | 0  |
|           | 7.74 | 4.88 | 3.44 | 3.1  | 1    | 1    | 2.06 | 1    | 1    | 0    | 1    | 1    | 1    | 0    | 1    | 0    | 0  |
|           | 2.34 | 1    | 1    | 0    | 0    |      | 1    | 1    | 1    | 0    | 0    | 0    | 0    | 0    | 1    | 0    | 0  |
|           | 4.25 | 3.47 | 0    | 0    | 0    | 0    | 0    | 0    | 0    | 0    | 0    | 0    |      |      | 0    | 0    | 0  |
|           | 5.11 | 4.79 | 3.13 | 3.01 | 2.11 | 2.06 | 1    | 1    | 1    | 2.35 | 0    | 1    | 1    |      | 1    | 0    | 0  |
|           | 0    | 2.96 | 3.85 | 0    | 0    | 0    | 0    | 1    | 0    | 1    | 0    | 0    | 0    | 0    | 1    | 0    | 0  |

|  |       |      |      |      |      |      |      |      |      |      |      |      |      |      |    |   |   |   |
|--|-------|------|------|------|------|------|------|------|------|------|------|------|------|------|----|---|---|---|
|  | 5.42  | 3.91 | 3.74 | 3.84 | 2.07 |      |      |      | 1    | 1    | 1    | 1    | 1    | 1    | 0  | 1 | 0 | 1 |
|  | 3.65  |      |      |      |      |      |      |      |      |      |      |      |      |      |    |   |   |   |
|  | 2.32  | 2.48 | 1    | 1    | 1    | 1    | 0    | 0    | 1    | 1    | 0    |      | 1    | 0    | 1  | 0 | 0 |   |
|  | 0     | 0    | 0    | 0    | 0    | 0    | 0    | 0    | 0    | 0    | 0    | 0    | 0    | 0    | 0  | 0 | 0 |   |
|  | 1     | 1    |      | 1    | 0    | 0    | 0    | 0    | 1    | 0    | 0    | 0    | 1    | 0    | 0  | 0 | 0 |   |
|  | 3.23  | 4.98 | 5.08 | 1    | 1    | 3.7  | 3    | 0    | 1    | 1    | 1    | 0    | 0    | 1    | 0  | 0 | 0 |   |
|  | 2.74  | 3.75 | 4.11 | 0    | 2.23 | 2.39 | 2.37 | 0    | 1    | 1    | 0    | 0    | 0    | 0    | 0  | 0 | 0 |   |
|  | 4.73  | 3.7  | 2.4  | 2    | 2.95 | 1    | 2.14 | 1    | 0    | 1    | 0    | 1    | 0    | 1    | 0  | 0 | 0 |   |
|  | 2.44  | 2.6  | 1    | 2.37 | 2.27 | 2.38 | 0    | 0    | 0    | 0    | 0    | 0    | 0    | 0    | 0  | 0 | 0 |   |
|  | 7.98  | 5.07 | 4.07 | 6.01 | 7.1  | 5.4  | 7.4  |      |      |      |      |      |      |      |    |   |   |   |
|  | 6.04  | 3.62 | 2.74 | 2.57 | 2.68 | 2.88 | 2.02 | 0    | 0    | 1    | 1    | 0    | 0    | 0    | 0  | 1 | 0 |   |
|  | 1     | 0    | 0    | 1    | 0    | 1    | 0    | 0    | 0    | 0    | 0    | 0    | 0    | 0    | 0  | 0 | 0 |   |
|  | 0     |      |      |      |      |      |      |      |      |      |      |      |      |      |    |   |   |   |
|  | 6.08  | 5.38 | 3.13 | 4.72 | 2.65 | 2.93 | 0    | 1    | 0    | 1    | 1    | 0    | 1    | 1    | 0  | 0 | 0 |   |
|  | 4.02  | 2.4  | 1    | 1    | 1    | 2.12 | 3.53 | 2.47 | 0    | 0    | 0    | 0    | 0    | 0    | 0  | 0 | 0 |   |
|  | 3.94  | 2.83 | 0    | 0    |      | 1    | 1    | 0    | 1    | 1    | 0    | 0    | 0    | 0    | 0  | 0 | 0 |   |
|  | 2.27  | 3.72 | 0    | 1    | 0    | 1    | 0    | 1    | 0    | 0    | 0    | 0    | 0    | 0    | 0  | 0 | 0 |   |
|  | 1     | 0    | 1    | 1    | 1    | 0    | 0    |      |      |      |      |      |      |      | 0  | 0 | 0 |   |
|  | 2.37  | 3.06 | 1    | 1    | 1    | 0    | 0    | 1    | 1    | 0    | 0    | 0    | 0    | 0    | 0  | 0 | 0 |   |
|  | 0     | 5.31 | 1    | 1    | 0    | 1    | 0    | 0    | 0    | 0    | 0    | 0    | 0    | 0    | 0  | 0 | 0 |   |
|  | 5.18  | 4.36 | 4.71 | 4.22 | 3.93 | 3.64 | 3.88 | 2.84 |      | 2.26 | 2.25 | 2.92 | 2.33 | 1    | 1  | 0 | 0 |   |
|  | 2.04  | 0    | 1    | 0    | 0    | 0    | 0    | 0    | 0    | 0    | 0    | 0    | 0    | 0    | 0  | 0 | 0 |   |
|  | 1     | 0    | 0    | 1    | 1    | 0    | 1    | 0    | 0    | 0    | 0    |      |      |      | 0  | 0 | 0 |   |
|  | 5.6   | 4.81 | 3.16 | 2    |      | 3.1  | 2.42 | 1    | 0    | 0    | 0    | 0    | 0    | 0    | 0  | 0 | 0 |   |
|  | 3.78  | 3.12 | 2.09 | 1    | 0    | 0    | 1    | 0    | 1    | 0    | 0    | 0    | 0    | 0    | 0  | 1 | 0 |   |
|  | 5.74  | 5.28 | 4.49 | 3.5  |      | 0    | 0    | 2.25 | 1    | 1    | 1    | 1    | 0    | 0    | 0  | 0 | 0 |   |
|  | 8.08  | 5.48 | 4.48 | 4.02 | 1    | 1    | 1    | 2.55 | 2.39 | 2    | 0    | 2.18 | 1    | 1    | 1  | 0 | 0 |   |
|  | 7.68* | 7.3  | 5.64 | 3.69 |      | 2.08 | 1    | 0    | 0    | 0    | 1    | 0    | 0    | 0    | 0  | 0 | 0 |   |
|  | 0     | 0    | 0    | 1    | 0    | 0    | 0    | 0    |      |      | 0    | 0    | 0    | 0    | 0  | 0 | 0 |   |
|  | 2.73  | 1    | 2.8  | 2.78 | 1    | 2.83 |      | 1    | 1    | 2.18 | 0    | 1    | 0    | 0    | 0  | 0 | 1 |   |
|  | 4.85  | 4.41 | 3    | 1    |      | 1    | 0    | 1    | 0    | 1    | 1    | 0    |      |      | 0  | 0 | 0 |   |
|  | 6.11  | 5.69 | 3.53 | 2.54 | 1    | 2.06 | 1    | 0    |      | 0    | 0    | 0    | 0    | 0    | 0  | 0 | 0 |   |
|  | 0     |      | 0    | 0    | 0    | 0    | 0    | 0    | 0    | 0    | 0    | 0    | 0    | 0    | 0  | 0 | 0 |   |
|  | 3.14  | 2.92 | 2.95 | 2.62 | 2.18 | 1    | 1    | 0    | 2.13 | 2.49 | 0    | 0    | 2.13 |      | 1  | 0 | 0 |   |
|  | 0     | 0    | 0    | 0    | 0    | 0    | 0    | 0    |      | 0    | 0    | 0    | 0    | 0    | 0  | 0 | 0 |   |
|  | 1     | 0    | 0    | 0    | 0    | 0    | 0    | 0    | 0    | 0    | 0    | 0    | 0    | 0    | 0  | 0 | 0 |   |
|  | 6.34  | 5.06 | 1    | 2.94 | 1    | 1    | 2.64 | 1    | 2.18 | 1    | 0    | 0    | 0    | 0    | 0  | 1 |   |   |
|  | 7.55  | 6.46 | 5.19 | 2.61 | 2.45 | 0    | 0    | 1    | 0    | 0    | 0    | 0    | 0    | 0    | 0  | 1 | 0 |   |
|  | 4.27  | 2.98 | 3.28 | 2.26 | 0    | 0    | 0    | 0    | 0    | 0    | 0    | 0    | 0    | 0    | 0  | 0 | 0 |   |
|  | 4.32  |      |      |      |      |      |      |      |      |      |      |      |      |      |    |   |   |   |
|  | 5.64  | 4.43 | 4.15 | 3.74 | 2.4  | 2.94 | 2.41 | 2.48 | 0    | 1    | 1    | 2.11 | 2.06 | 1    | 1  | 1 | 0 |   |
|  | 6.91  | 4.1  | 3.54 | 3.16 | 2.63 | 3.33 | 2.82 | 2.86 |      |      |      |      |      |      | 0  | 0 | 0 |   |
|  | 7.4   | 6.25 | 4.41 | 4.39 | 1    | 3.1  | 2.63 | 2.59 | 0    | 0    | 0    | 0    | 0    | 0    | 0  | 0 | 0 |   |
|  | 5.02  | 4.07 | 3.14 | 2.31 | 1    | 2.19 | 1    | 2.08 | 2.62 | 1    | 1    | 0    | 0    | 1    | 0  | 1 | 0 |   |
|  | 2.13  |      | 0    | 0    | 0    | 0    | 0    | 0    | 0    | 0    | 0    | 0    | 0    | 1    | 0  | 0 | 0 |   |
|  | 4.38  | 4.67 | 4.15 | 2.61 | 2.16 | 1    | 1    | 1    | 1    | 1    | 0    | 0    | 1    | 0    | 0  | 0 | 0 |   |
|  | 7.7   | 5.02 | 3.59 | 2.5  | 1    | 1    | 1    | 0    | 0    | 0    | 0    | 0    | 0    | 0    | 1  | 0 | 0 |   |
|  | 8.08  |      | 5.34 | 4.12 | 3.76 | 2.6  | 2.24 | 2.75 | 1    | 1    | 1    | 1    | 0    | 3.82 | 0  | 0 | 0 |   |
|  | 8.84  |      | 6.22 | 6.4  | 5.26 | 3.5  | 4.19 | 2.24 | 0    | 3.2  | 1    | 1    | 1    | 1    | 0  | 0 | 0 |   |
|  | 2     |      | 2.74 | 0    | 0    | 0    | 0    | 1    | 0    | 0    | 0    | 0    | 0    | 0    | 0  | 0 | 0 |   |
|  | 7.76  | 6.02 | 3.15 | 4.53 | 1    | 0    | 0    | 0    | 1    | 0    | 0    | 0    | 0    | 0    | 0* | 0 | 0 |   |
