# Supplementary material
Source: PubMed Central journal article supplement (PMC9675946)
Supplement: NIHMS1845806-supplement-1845806_SD_Fig_3.pdf [file NIHMS1845806-supplement-1845806_SD_Fig_3.pdf]

Figure3  
B2\_2\_NP

| Days_since_symptom_onset | Visit_day | NP viral load | E484 | 484K | 484Q |
|--------------------------|-----------|---------------|------|------|------|
| 6                        | 0         | 6.44          | 36   | 61   | 3    |
| 7                        | 1         |               |      |      |      |
| 8                        | 2         |               |      |      |      |
| 9                        | 3         | 4.91          | 3    | 97   |      |
| 10                       | 4         |               |      |      |      |
| 11                       | 5         |               |      |      |      |
| 12                       | 6         |               |      |      |      |
| 13                       | 7         | 4.95          |      |      | 100  |
| 14                       | 8         |               |      |      |      |
| 15                       | 9         |               |      |      |      |
| 16                       | 10        |               |      |      |      |
| 17                       | 11        |               |      |      |      |
| 18                       | 12        |               |      |      |      |
| 19                       | 13        |               |      |      |      |
| 20                       | 14        | 2.38          |      | 51   | 49   |
|                          |           |               |      |      |      |
|                          |           |               |      |      |      |
|                          |           |               |      |      |      |
|                          |           |               |      |      |      |
|                          |           |               |      |      |      |
| 27                       | 21        | 0             |      |      |      |
|                          |           |               |      |      |      |
|                          |           |               |      |      |      |
|                          |           |               |      |      |      |
|                          |           |               |      |      |      |
| 34                       | 28        | 1             |      |      |      |

B2\_2\_NP

| Days_since_symptom_onset | Visit_day | AN viral load | E484 | 484K | 484Q |
|--------------------------|-----------|---------------|------|------|------|
| 6                        | 0         | 5.81          | 94   | 3    | 3    |
| 7                        | 1         | 3.57          | 49   | 33   | 18   |
| 8                        | 2         | 3.94          | 2    | 98   |      |
| 9                        | 3         | 3.45          | 2    | 76   | 22   |
| 10                       | 4         | 4.3           | 32   | 12   | 56   |
| 11                       | 5         | 4.9           |      | 96   | 4    |
| 12                       | 6         | 4.27          |      | 90   | 10   |
| 13                       | 7         | 3.56          |      | 44   | 56   |
| 14                       | 8         | 6.55          |      | 100  |      |
| 15                       | 9         | 5.69          |      | 85   | 15   |
| 16                       | 10        | 5.41          |      | 98   | 2    |
| 17                       | 11        | 6.82          |      |      | 100  |
| 18                       | 12        | 6.82          |      |      | 100  |
| 19                       | 13        | 5.07          |      |      | 100  |
| 20                       | 14        | 3.81          |      |      | 100  |
|                          |           |               |      |      |      |
|                          |           |               |      |      |      |
|                          |           |               |      |      |      |
|                          |           |               |      |      |      |
|                          |           |               |      |      |      |
|                          |           |               |      |      |      |
|                          |           |               |      |      |      |
| 27                       | 21        | 0             |      |      |      |
|                          |           |               |      |      |      |
|                          |           |               |      |      |      |
|                          |           |               |      |      |      |
|                          |           |               |      |      |      |
|                          |           |               |      |      |      |
|                          |           |               |      |      |      |
|                          |           |               |      |      |      |
| 34                       | 28        | 0             |      |      |      |

B2\_3\_NP

| Days_since_symptom_onset | Visit_day | NP viral load | E484 | 484K |
|--------------------------|-----------|---------------|------|------|
| 2                        | 0         | 6.72          | 100  |      |
| 3                        | 1         |               |      |      |
| 4                        | 2         |               |      |      |
| 5                        | 3         | 5.93          | 84   | 16   |
| 6                        | 4         |               |      |      |
| 7                        | 5         |               |      |      |
|                          |           |               |      |      |
| 9                        | 7         | 6.03          | 3    | 97   |
| 10                       | 8         |               |      |      |
| 11                       | 9         |               |      |      |
| 12                       | 10        |               |      |      |
| 13                       | 11        |               |      |      |
| 14                       | 12        |               |      |      |
| 15                       | 13        |               |      |      |
| 16                       | 14        | 2.21          | 17   | 83   |
|                          |           |               |      |      |
|                          |           |               |      |      |
|                          |           |               |      |      |
|                          |           |               |      |      |
|                          |           |               |      |      |
|                          |           |               |      |      |
|                          |           |               |      |      |
| 23                       | 21        | 1             |      |      |
|                          |           |               |      |      |
|                          |           |               |      |      |
|                          |           |               |      |      |
|                          |           |               |      |      |
|                          |           |               |      |      |
| 30                       | 28        | 0             |      |      |

B2\_3\_AN

| Days_since_symptom_onset | Visit_day | AN viral load | E484 | 484K |
|--------------------------|-----------|---------------|------|------|
| 2                        | 0         | 7.34          | 100  |      |
| 3                        | 1         | 7.52          | 100  |      |
| 4                        | 2         | 5.28          | 100  |      |
| 5                        | 3         | 4.22          | 92   | 8    |
| 6                        | 4         | 5.76          | 2    | 98   |
| 7                        | 5         | 6.77          | 2    | 98   |
|                          |           |               |      |      |
| 9                        | 7         | 7.77          |      | 100  |
| 10                       | 8         | 6.85          |      | 100  |
| 11                       | 9         | 6.73          |      | 100  |
| 12                       | 10        | 5.72          | 3    | 97   |
| 13                       | 11        | 4.15          |      | 100  |
| 14                       | 12        | 3.45          |      | 100  |
| 15                       | 13        | 1             |      |      |
| 16                       | 14        | 0             |      |      |
|                          |           |               |      |      |
|                          |           |               |      |      |
|                          |           |               |      |      |
|                          |           |               |      |      |
|                          |           |               |      |      |
|                          |           |               |      |      |
| 23                       | 21        | 0             |      |      |
|                          |           |               |      |      |
|                          |           |               |      |      |
|                          |           |               |      |      |
|                          |           |               |      |      |
|                          |           |               |      |      |
|                          |           |               |      |      |
| 30                       | 28        | 0             |      |      |

>B2\_2\_AN\_day0\_NTD-S2

MFVFLVLLPLVSSQCVNLTTRTQLPPAYTNSFTRGVYYPDKVFRSSVLHSTQDLFLPFFSNVTFHAIHV  
SGTNGTKRFDNPVLPFNDGVYFASTEKSNIIRGWIFGTTLDSTQSLLIVNNATNVVIKVCFQFCNDPF  
LGVYYHKNNKSWMESEFRVYSSANNCTFEYVSQPFLMDLEGKQGNFKNLREFVFNIDGYFKIYSKHTPI  
NLVRDLPQGFSALEPLVDLPIGINITRFQTLALHRSYLPDGFSSGWTAGAAAYVGYLQPRTFLLKYN  
ENGTITDAVDCALDPLSETKCTLSFTVEKGIYQTSNFRVQPTESIVRFPNITNLCPFGEVFNATRFASV  
YAWNRKRISNCVADYSVLYNSASFSTFKCYGVSPTKLNLDLCTNVYADSFVIRGDEVQRQIAPGQTGKIAD  
YNYKLPDDFTGCVIAWNSNNLDSKVGGNLYRFRKSNLKPFERDISTEIQAGSTPCNGVEGFNCYF  
PLQSYGFQPTNGVGYQPYRVVLSFELLHAPATVCGPKKSTNLVKNKCVNFNGLTGTGVLTESNKKFL  
PFQQFGRDIADTTDAVRDPQTLEILDITPCSFSGVSVITPGTNTSNQVAVLYQGVNCTEVPVAIHADQLT  
PTWRVYSTGSNVFQTRAGCLIGAHEVNNSYECDIPIGAGICASYQTQTNPRRARSVASQSIIAYTMSLG  
AENSVAYSNNNSIAIPTNFTISVTTEILPVSMTKTSVDCTMYICGDSTECSNLLLQYGSFCTQLNRALTGI  
AVEQDKNTQEVFAQVKQIYKTPPIKDFGGFNFSQILPDPSPKPSX

>B2\_2\_AN\_day1\_NTD-S2

MFVFLVLLPLVSSQCVNLTTRTQLPPAYTNSFTRGVYYPDKVFRSSVLHSTQDLFLPFFSNVTFHAIHV  
SGTNGTKRFDNPVLPFNDGVYFASTEKSNIIRGWIFGTTLDSTQSLLIVNNATNVVIKVCFQFCNDPF  
LGVYYHKNNKSWMESEFRVYSSANNCTFEYVSQPFLMDLEGKQGNFKNLREFVFNIDGYFKIYSKHTPI  
NLVRDLPQGFSALEPLVDLPIGINITRFQTLALHRSYLPDGFSSGWTAGAAAYVGYLQPRTFLLKYN  
ENGTITDAVDCALDPLSETKCTLSFTVEKGIYQTSNFRVQPTESIVRFPNITNLCPFGEVFNATRFASV  
YAWNRKRISNCVADYSVLYNSASFSTFKCYGVSPTKLNLDLCTNVYADSFVIRGDEVQRQIAPGQTGKIAD  
YNYKLPDDFTGCVIAWNSNNLDSKVGGNLYRFRKSNLKPFERDISTEIQAGSTPCNGVEGFNCYF  
PLQSYGFQPTNGVGYQPYRVVLSFELLHAPATVCGPKKSTNLVKNKCVNFNGLTGTGVLTESNKKFL  
PFQQFGRDIADTTDAVRDPQTLEILDITPCSFSGVSVITPGTNTSNQVAVLYQGVNCTEVPVAIHADQLT  
PTWRVYSTGSNVFQTRAGCLIGAHEVNNSYECDIPIGAGICASYQTQTNPRRARSVASQSIIAYTMSLG  
AENSVAYSNNNSIAIPTNFTISVTTEILPVSMTKTSVDCTMYICGDSTECSNLLLQYGSFCTQLNRALTGI  
AVEQDKNTQEVFAQVKQIYKTPPIKDFGGFNFSQILPDPSPKPSX

>B2\_2\_AN\_day2\_NTD-S2

MFVFLVLLPLVSSQCVNLTTRTQLPPAYTNSFTRGVYYPDKVFRSSVLHSTQDLFLPFFSNVTFHAIHV  
SGTNGTKRFDNPVLPFNDGVYFASTEKSNIIRGWIFGTTLDSTQSLLIVNNATNVVIKVCFQFCNDPF  
LGVYYHKNNKSWMESEFRVYSSANNCTFEYVSQPFLMDLEGKQGNFKNLREFVFNIDGYFKIYSKHTPI  
NLVRDLPQGFSALEPLVDLPIGINITRFQTLALHRSYLPDGFSSGWTAGAAAYVGYLQPRTFLLKYN  
ENGTITDAVDCALDPLSETKCTLSFTVEKGIYQTSNFRVQPTESIVRFPNITNLCPFGEVFNATRFASV  
YAWNRKRISNCVADYSVLYNSASFSTFKCYGVSPTKLNLDLCTNVYADSFVIRGDEVQRQIAPGQTGKIAD  
YNYKLPDDFTGCVIAWNSNNLDSKVGGNLYRFRKSNLKPFERDISTEIQAGSTPCNGVKGFNFCYF  
PLQSYGFQPTNGVGYQPYRVVLSFELLHAPATVCGPKKSTNLVKNKCVNFNGLTGTGVLTESNKKFL  
PFQQFGRDIADTTDAVRDPQTLEILDITPCSFSGVSVITPGTNTSNQVAVLYQGVNCTEVPVAIHADQLT  
PTWRVYSTGSNVFQTRAGCLIGAHEVNNSYECDIPIGAGICASYQTQTNPRRARSVASQSIIAYTMSLG  
AENSVAYSNNNSIAIPTNFTISVTTEILPVSMTKTSVDCTMYICGDSTECSNLLLQYGSFCTQLNRALTGI  
AVEQDKNTQEVFAQVKQIYKTPPIKDFGGFNFSQILPDPSPKPSX

>B2\_2\_AN\_day3\_NTD-S2

MFVFLVLLPLVSSQCVNLTTRTQLPPAYTNSFTRGVYYPDKVFRSSVLHSTQDLFLPFFSNVTFHAIHV  
SGTNGTKRFDNPVLPFNDGVYFASTEKSNIIRGWIFGTTLDSTQSLLIVNNATNVVIKVCFQFCNDPF  
LGVYYHKNNKSWMESEFRVYSSANNCTFEYVSQPFLMDLEGKQGNFKNLREFVFNIDGYFKIYSKHTPI  
NLVRDLPQGFSALEPLVDLPIGINITRFQTLALHRSYLPDGFSSGWTAGAAAYVGYLQPRTFLLKYN  
ENGTITDAVDCALDPLSETKCTLSFTVEKGIYQTSNFRVQPTESIVRFPNITNLCPFGEVFNATRFASV  
YAWNRKRISNCVADYSVLYNSASFSTFKCYGVSPTKLNLDLCTNVYADSFVIRGDEVQRQIAPGQTGKIAD  
YNYKLPDDFTGCVIAWNSNNLDSKVGGNLYRFRKSNLKPFERDISTEIQAGSTPCNGVKGFNFCYF  
PLQSYGFQPTNGVGYQPYRVVLSFELLHAPATVCGPKKSTNLVKNKCVNFNGLTGTGVLTESNKKFL  
PFQQFGRDIADTTDAVRDPQTLEILDITPCSFSGVSVITPGTNTSNQVAVLYQGVNCTEVPVAIHADQLT  
PTWRVYSTGSNVFQTRAGCLIGAHEVNNSYECDIPIGAGICASYQTQTNPRRARSVASQSIIAYTMSLG

AENSVAYSNNSIAIPTNFTISVTTEILPVSMTKTSVDCTMYICGDSTECSNLLLQYGSFCTQLNRALTGI  
AVEQDKNTQEVFAQVKQIYKTPPIKDFGGFNFSQILPDPSPKPSX

>B2\_2\_AN\_day4\_NTD-S2

MFVFLVLLPLVSSQCVNLTTRTQLPPAYTNSFTRGVYYPDKVFRSSVLHSTQDLFLPFFSNVTFHAIHV  
SGTNGTKRFDNPVLPFNDGVYFASTSEKSNIIRGWIFGTTLDSTQSLIIVNNATNVVIKVECFQFCNDPF  
LGVYYHKNNKSWMESEFRVYSSANNCTFEYVSQPFLMDLEGKQGNFKNLREFVFKNIDGYFKIYSKHTPI  
NLVRDLPOGFSALEPLVDLPIGINITRFQTLALHRSYLTGDFSSGWTAGAAAYVGYLQPRTFLLKYN  
ENGTITDAVDCALDPLSEKCTLSFTVEKGIYQTSNFRVQPTESIVRFPNITNLCPFGEVFNATRFASV  
YAWNRKRISNCVADYSVLYNSASFSTFKCYGVSPTKLNLDLCTNVYADSFVIRGDEVQRQIAPGQTGKIAD  
YNYKLPDDFTGCVIAWNSNNLDSKVGGNLYRFRKSNLKPFERDISTEIQAGSTPCNGVQGFNCYF  
PLQSYGFQPTNGVGYQPYRVVLSFELLHAPATVCGPKKSTNLVKNKCVNFNFGLTGTGVLTESNKKFL  
PFQQFGRDIADTTDAVRDPQTLILDITPCSFGGVSVITPGTNTSNQVAVLYQGVNCTEVPVAIHADQLT  
PTWRVYSTGNSVNFQTRAGCLIGAHEVNNSYECDIPIGAGICASYQTQTNPRRARSVASQSIIAYTMSLG  
AENSVAYSNNSIAIPTNFTISVTTEILPVSMTKTSVDCTMYICGDSTECSNLLLQYGSFCTQLNRALTGI  
AVEQDKNTQEVFAQVKQIYKTPPIKDFGGFNFSQILPDPSPKPSX

>B2\_2\_AN\_day5\_NTD-S2

MFVFLVLLPLVSSQCVNLTTRTQLPPAYTNSFTRGVYYPDKVFRSSVLHSTQDLFLPFFSNVTFHAIHV  
SGTNGTKRFDNPVLPFNDGVYFASTSEKSNIIRGWIFGTTLDSTQSLIIVNNATNVVIKVECFQFCNDPF  
LGVYYHKNNKSWMESEFRVYSSANNCTFEYVSQPFLMDLEGKQGNFKNLREFVFKNIDGYFKIYSKHTPI  
NLVRDLPOGFSALEPLVDLPIGINITRFQTLALHRSYLTGDFSSGWTAGAAAYVGYLQPRTFLLKYN  
ENGTITDAVDCALDPLSEKCTLSFTVEKGIYQTSNFRVQPTESIVRFPNITNLCPFGEVFNATRFASV  
YAWNRKRISNCVADYSVLYNSASFSTFKCYGVSPTKLNLDLCTNVYADSFVIRGDEVQRQIAPGQTGKIAD  
YNYKLPDDFTGCVIAWNSNNLDSKVGGNLYRFRKSNLKPFERDISTEIQAGSTPCNGVQGFNCYF  
PLQSYGFQPTNGVGYQPYRVVLSFELLHAPATVCGPKKSTNLVKNKCVNFNFGLTGTGVLTESNKKFL  
PFQQFGRDIADTTDAVRDPQTLILDITPCSFGGVSVITPGTNTSNQVAVLYQGVNCTEVPVAIHADQLT  
PTWRVYSTGNSVNFQTRAGCLIGAHEVNNSYECDIPIGAGICASYQTQTNPRRARSVASQSIIAYTMSLG  
AENSVAYSNNSIAIPTNFTISVTTEILPVSMTKTSVDCTMYICGDSTECSNLLLQYGSFCTQLNRALTGI  
AVEQDKNTQEVFAQVKQIYKTPPIKDFGGFNFSQILPDPSPKPSX

>B2\_2\_AN\_day6\_NTD-S2

MFVFLVLLPLVSSQCVNLTTRTQLPPAYTNSFTRGVYYPDKVFRSSVLHSTQDLFLPFFSNVTFHAIHV  
SGTNGTKRFDNPVLPFNDGVYFASTSEKSNIIRGWIFGTTLDSTQSLIIVNNATNVVIKVECFQFCNDPF

---

YYHKNNKSWMESEFRVYSSANNCTFEYVSQPFLMDLEGKQGNFKNLREFVFKNIDGYFKIYSKHTPINLV  
RDLPOGFSALEPLVDLPIGINITRFQTLALHRSYLTGDFSSGWTAGAAAYVGYLQPRTFLLKYNENG  
TITDAVDCALDPLSEKCTLSFTVEKGIYQTSNFRVQPTESIVRFPNITNLCPFGEVFNATRFASVYAW  
NRKRISNCVADYSVLYNSASFSTFKCYGVSPTKLNLDLCTNVYADSFVIRGDEVQRQIAPGQTGKIADYNY  
KLPDDFTGCVIAWNSNNLDSKVGGNLYRFRKSNLKPFERDISTEIQAGSTPCNGVQGFNCYFPLQ  
SYGFQPTNGVGYQPYRVVLSFELLHAPATVCGPKKSTNLVKNKCVNFNFGLTGTGVLTESNKKFLPFQ  
QFGRDIADTTDAVRDPQTLILDITPCSFGGVSVITPGTNTSNQVAVLYQGVNCTEVPVAIHADQLTPTW  
RVYSTGNSVNFQTRAGCLIGAHEVNNSYECDIPIGAGICASYQTQTNPRRARSVASQSIIAYTMSLGAEN  
SVAYSNNSIAIPTNFTISVTTEILPVSMTKTSVDCTMYICGDSTECSNLLLQYGSFCTQLNRALTGIAVE  
QDKNTQEVFAQVKQIYKTPPIKDFGGFNFSQILPDPSPKPSX

>B2\_2\_AN\_day7\_NTD-S2

MFVFLVLLPLVSSQCVNLTTRTQLPPAYTNSFTRGVYYPDKVFRSSVLHSTQDLFLPFFSNVTFHAIHV  
SGTNGTKRFDNPVLPFNDGVYFASTSEKSNIIRGWIFGTTLDSTQSLIIVNNATNVVIKVECFQFCNDPF  
L--

YYHKNNKSWMESEFRVYSSANNCTFEYVSQPFLMDLEGKQGNFKNLREFVFKNIDGYFKIYSKHTPINLV  
RDLPOGFSALEPLVDLPIGINITRFQTLALHRSYLTGDFSSGWTAGAAAYVGYLQPRTFLLKYNENG  
TITDAVDCALDPLSEKCTLSFTVEKGIYQTSNFRVQPTESIVRFPNITNLCPFGEVFNATRFASVYAW  
NRKRISNCVADYSVLYNSASFSTFKCYGVSPTKLNLDLCTNVYADSFVIRGDEVQRQIAPGQTGKIADYNY

KLPDDFTGCVIAWNSNNLDSKVGGNYNLYRLFRKSNLKPFERDISTEIQAGSTPCNGVQGFNCYFPLO  
SYGFQPTNGVGYQPYRVVLSFELLHAPATVCGPKKSTNLVKNKCVNFNFNGLTGTGVLTESNKKFLPFQ  
QFGRDIADTTDAVRDPQLEILDITPCSFGGVSVITPGTNTSNQVAVLYQGVNCTEVPVAIHADQLTPTW  
RVYSTGSNVFQTRAGCLIGAHEVNSYECDIPIGAGICASYQTQTNSPRRARSVASQSIIAYTMSLGAEN  
SVAYSNNSIAIPTNFTISVTTEILPVSMTKTSVDCTMYICGDSTECNLLLQYGSFCTQLNRALTGIAVE  
QDKNTQEVFAQVKQIYKTPPIKDFGGFNFSQILPDPSKPSX

>B2\_2\_AN\_day8\_NTD-S2

MFVFLVLLPLVSSQCVNLTRTQLPPAYTNSFTRGVYYPDKVFRSSVLHSTQDLFLPFFSNVTFHAIHV  
SGTNGTKRFDNPVLPFNDGVYFASTEKSNIIRGWI FGTTLD SKTQSL L I V N N A T N V V I K V C E F Q F C N D P F  
---

YYHKNNKSWMESEFRVYSSANNCTFEYVSQPFLMDLEGKQGNFKNLREFVFKNIDGYFKIYSKHTPINLV  
RDL PQGFSALEPLVDLP IGINITRFQTL LALHRSYLT PGDFSSGWTAGAAAYYVGYLQPRTFLLKYNENG  
TITDAVDCALDPLSETKCTLKSFTVEKGIYQTSNFRVQPTESIVRFPNITNLCPFGEVFNATRFASVYAW  
NRKRISNCVADYSVLYNSASFSTFKCYGVSPKLNLDL CFTNVYADSFVIRGDEV RQIAPGQTGKIADYNY  
KLPDDFTGCVIAWNSNNLDSKVGGNYNLYRLFRKSNLKPFERDISTEIQAGSTPCNGVKGFNFCYFPLO  
SYGFQPTNGVGYQPYRVVLSFELLHAPATVCGPKKSTNLVKNKCVNFNFNGLTGTGVLTESNKKFLPFQ  
QFGRDIADTTDAVRDPQLEILDITPCSFGGVSVITPGTNTSNQVAVLYQGVNCTEVPVAIHADQLTPTW  
RVYSTGSNVFQTRAGCLIGAHEVNSYECDIPIGAGICASYQTQTNSPRRARSVASQSIIAYTMSLGAEN  
SVAYSNNSIAIPTNFTISVTTEILPVSMTKTSVDCTMYICGDSTECNLLLQYGSFCTQLNRALTGIAVE  
QDKNTQEVFAQVKQIYKTPPIKDFGGFNFSQILPDPSKPSX

>B2\_2\_AN\_day9\_NTD-S2

MFVFLVLLPLVSSQCVNLTRTQLPPAYTNSFTRGVYYPDKVFRSSVLHSTQDLFLPFFSNVTFHAIHV  
SGTNGTKRFDNPVLPFNDGVYFASTEKSNIIRGWI FGTTLD SKTQSL L I V N N A T N V V I K V C E F Q F C N D P F  
---

YYHKNNKSWMESEFRVYSSANNCTFEYVSQPFLMDLEGKQGNFKNLREFVFKNIDGYFKIYSKHTPINLV  
RDL PQGFSALEPLVDLP IGINITRFQTL LALHRSYLT PGDFSSGWTAGAAAYYVGYLQPRTFLLKYNENG  
TITDAVDCALDPLSETKCTLKSFTVEKGIYQTSNFRVQPTESIVRFPNITNLCPFGEVFNATRFASVYAW  
NRKRISNCVADYSVLYNSASFSTFKCYGVSPKLNLDL CFTNVYADSFVIRGDEV RQIAPGQTGKIADYNY  
KLPDDFTGCVIAWNSNNLDSKVGGNYNLYRLFRKSNLKPFERDISTEIQAGSTPCNGVKGFNFCYFPLO  
SYGFQPTNGVGYQPYRVVLSFELLHAPATVCGPKKSTNLVKNKCVNFNFNGLTGTGVLTESNKKFLPFQ  
QFGRDIADTTDAVRDPQLEILDITPCSFGGVSVITPGTNTSNQVAVLYQGVNCTEVPVAIHADQLTPTW  
RVYSTGSNVFQTRAGCLIGAHEVNSYECDIPIGAGICASYQTQTNSPRRARSVASQSIIAYTMSLGAEN  
SVAYSNNSIAIPTNFTISVTTEILPVSMTKTSVDCTMYICGDSTECNLLLQYGSFCTQLNRALTGIAVE  
QDKNTQEVFAQVKQIYKTPPIKDFGGFNFSQILPDPSKPSX

>B2\_2\_AN\_day10\_NTD-S2

MFVFLVLLPLVSSQCVNLTRTQLPPAYTNSFTRGVYYPDKVFRSSVLHSTQDLFLPFFSNVTFHAIHV  
SGTNGTKRFDNPVLPFNDGVYFASTEKSNIIRGWI FGTTLD SKTQSL L I V N N A T N V V I K V C E F Q F C N D P F  
---

YYHKNNKSWMESEFRVYSSANNCTFEYVSQPFLMDLEGKQGNFKNLREFVFKNIDGYFKIYSKHTPINLV  
RDL PQGFSALEPLVDLP IGINITRFQTL LALHRSYLT PGDFSSGWTAGAAAYYVGYLQPRTFLLKYNENG  
TITDAVDCALDPLSETKCTLKSFTVEKGIYQTSNFRVQPTESIVRFPNITNLCPFGEVFNATRFASVYAW  
NRKRISNCVADYSVLYNSASFSTFKCYGVSPKLNLDL CFTNVYADSFVIRGDEV RQIAPGQTGKIADYNY  
KLPDDFTGCVIAWNSNNLDSKVGGNYNLYRLFRKSNLKPFERDISTEIQAGSTPCNGVKGFNFCYFPLO  
SYGFQPTNGVGYQPYRVVLSFELLHAPATVCGPKKSTNLVKNKCVNFNFNGLTGTGVLTESNKKFLPFQ  
QFGRDIADTTDAVRDPQLEILDITPCSFGGVSVITPGTNTSNQVAVLYQGVNCTEVPVAIHADQLTPTW  
RVYSTGSNVFQTRAGCLIGAHEVNSYECDIPIGAGICASYQTQTNSPRRARSVASQSIIAYTMSLGAEN  
SVAYSNNSIAIPTNFTISVTTEILPVSMTKTSVDCTMYICGDSTECNLLLQYGSFCTQLNRALTGIAVE  
QDKNTQEVFAQVKQIYKTPPIKDFGGFNFSQILPDPSKPSX

>B2\_2\_AN\_day11\_NTD-S2

MFVFLVLLLLLVSSQCVNLTRTQLPPAYTNSFTRGVYYPDKVFRSSVLHSTQDLFLPFFSNVTFHAIHV

SGTNGTKRFDNPVLPFNDGVYFASTEKSNIIRGWIFGTTLDSTQSLIIVNNATNVVIKVCFQFCNDPF  
LGVYYHKNNKSWMESEFRVYSSANNCTFEYVSQPFLMDLEGKQGNFKNLREFVFKNIDGYFKIYSKHTPI  
NLVRDLPQGFSALEPLVDLPIGINITRFQTLALHRSYLTGDFSSGWTAGAAAYVGYLQPRTFLLKYN  
ENGTITDAVDCALDPLSETKCTLSFTVEKGIYQTSNFRVQPTESIVRFPNITNLCPFGEVFNATRFASV  
YAWNRKRISNCVADYSVLVNSASFSTFKCYGVSPTKLNLDLCTNVYADSFVIRGDEVQRQIAPGQTGKIAD  
YNYKLPDDFTGCVIAWNSNNLDSKVGGNLYRFRKSNLKPFERDISTEIQAGSTPCNGVQGFNCYF  
PLQSYGFQPTNGVGYQPYRVVLSFELLHAPATVCGPKKSTNLVKNKCVNFNFNGLTGTGVLTESNKKFL  
PFQQFGRDIADTTDAVRDPQTLLEILDITPCSFSGGVSITPGTNTSNQVAVLYQGVNCTEVPVAIHADQLT  
PTWRVYSTGSNVFQTRAGCLIGAHEVNNSYECDIPIGAGICASYQTQTNPRRARSVASQSIIAYTMSLG  
AENSVAYSNNNSIAIPTNFTISVTTEILPVSMKTSVDCTMYICGDSTECSNLLLQYGSFCTQLNRALTGI  
AVEQDKNTQEVFAQVKQIYKTPPIKDFGGFNFSQILPDPSPKPSX

>B2\_2\_AN\_day12\_NTD-S2

MFVFLVLLLLVSSQCVNLTTTRTQLPPAYTNSFTRGVYYPDKVFRSSVLHSTQDLFLPFFSNVTFHAIHV  
SGTNGTKRFDNPVLPFNDGVYFASTEKSNIIRGWIFGTTLDSTQSLIIVNNATNVVIKVCFQFCNDPF  
LGVYYHKNNKSWMESEFRVYSSANNCTFEYVSQPFLMDLEGKQGNFKNLREFVFKNIDGYFKIYSKHTPI  
NLVRDLPQGFSALEPLVDLPIGINITRFQTLALHRSYLTGDFSSGWTAGAAAYVGYLQPRTFLLKYN  
ENGTITDAVDCALDPLSETKCTLSFTVEKGIYQTSNFRVQPTESIVRFPNITNLCPFGEVFNATRFASV  
YAWNRKRISNCVADYSVLVNSASFSTFKCYGVSPTKLNLDLCTNVYADSFVIRGDEVQRQIAPGQTGKIAD  
YNYKLPDDFTGCVIAWNSNNLDSKVGGNLYRFRKSNLKPFERDISTEIQAGSTPCNGVQGFNCYF  
PLQSYGFQPTNGVGYQPYRVVLSFELLHAPATVCGPKKSTNLVKNKCVNFNFNGLTGTGVLTESNKKFL  
PFQQFGRDIADTTDAVRDPQTLLEILDITPCSFSGGVSITPGTNTSNQVAVLYQGVNCTEVPVAIHADQLT  
PTWRVYSTGSNVFQTRAGCLIGAHEVNNSYECDIPIGAGICASYQTQTNPRRARSVASQSIIAYTMSLG  
AENSVAYSNNNSIAIPTNFTISVTTEILPVSMKTSVDCTMYICGDSTECSNLLLQYGSFCTQLNRALTGI  
AVEQDKNTQEVFAQVKQIYKTPPIKDFGGFNFSQILPDPSPKPSX

>B2\_2\_AN\_day13\_NTD-S2

MFVFLVLLLLVSSQCVNLTTTRTQLPPAYTNSFTRGVYYPDKVFRSSVLHSTQDLFLPFFSNVTFHAIHV  
SGTNGTKRFDNPVLPFNDGVYFASTEKSNIIRGWIFGTTLDSTQSLIIVNNATNVVIKVCFQFCNDPF  
LGVYYHKNNKSWMESEFRVYSSANNCTFEYVSQPFLMDLEGKQGNFKNLREFVFKNIDGYFKIYSKHTPI  
NLVRDLPQGFSALEPLVDLPIGINITRFQTLALHRSYLTGDFSSGWTAGAAAYVGYLQPRTFLLKYN  
ENGTITDAVDCALDPLSETKCTLSFTVEKGIYQTSNFRVQPTESIVRFPNITNLCPFGEVFNATRFASV  
YAWNRKRISNCVADYSVLVNSASFSTFKCYGVSPTKLNLDLCTNVYADSFVIRGDEVQRQIAPGQTGKIAD  
YNYKLPDDFTGCVIAWNSNNLDSKVGGNLYRFRKSNLKPFERDISTEIQAGSTPCNGVQGFNCYF  
PLQSYGFQPTNGVGYQPYRVVLSFELLHAPATVCGPKKSTNLVKNKCVNFNFNGLTGTGVLTESNKKFL  
PFQQFGRDIADTTDAVRDPQTLLEILDITPCSFSGGVSITPGTNTSNQVAVLYQGVNCTEVPVAIHADQLT  
PTWRVYSTGSNVFQTRAGCLIGAHEVNNSYECDIPIGAGICASYQTQTNPRRARSVASQSIIAYTMSLG  
AENSVAYSNNNSIAIPTNFTISVTTEILPVSMKTSVDCTMYICGDSTECSNLLLQYGSFCTQLNRALTGI  
AVEQDKNTQEVFAQVKQIYKTPPIKDFGGFNFSQILPDPSPKPSX

>B2\_2\_AN\_day14\_NTD-S2

MFVFLVLLLLVSSQCVNLTTTRTQLPPAYTNSFTRGVYYPDKVFRSSVLHSTQDLFLPFFSNVTFHAIHV  
SGTNGTKRFDNPVLPFNDGVYFASTEKSNIIRGWIFGTTLDSTQSLIIVNNATNVVIKVCFQFCNDPF  
LGVYYHKNNKSWMESEFRVYSSANNCTFEYVSQPFLMDLEGKQGNFKNLREFVFKNIDGYFKIYSKHTPI  
NLVRDLPQGFSALEPLVDLPIGINITRFQTLALHRSYLTGDFSSGWTAGAAAYVGYLQPRTFLLKYN  
ENGTITDAVDCALDPLSETKCTLSFTVEKGIYQTSNFRVQPTESIVRFPNITNLCPFGEVFNATRFASV  
YAWNRKRISNCVADYSVLVNSASFSTFKCYGVSPTKLNLDLCTNVYADSFVIRGDEVQRQIAPGQTGKIAD  
YNYKLPDDFTGCVIAWNSNNLDSKVGGNLYRFRKSNLKPFERDISTEIQAGSTPCNGVQGFNCYF  
PLQSYGFQPTNGVGYQPYRVVLSFELLHAPATVCGPKKSTNLVKNKCVNFNFNGLTGTGVLTESNKKFL  
PFQQFGRDIADTTDAVRDPQTLLEILDITPCSFSGGVSITPGTNTSNQVAVLYQGVNCTEVPVAIHADQLT  
PTWRVYSTGSNVFQTRAGCLIGAHEVNNSYECDIPIGAGICASYQTQTNPRRARSVASQSIIAYTMSLG  
AENSVAYSNNNSIAIPTNFTISVTTEILPVSMKTSVDCTMYICGDSTECSNLLLQYGSFCTQLNRALTGI  
AVEQDKNTQEVFAQVKQIYKTPPIKDFGGFNFSQILPDPSPKPSX



>B2\_2\_NP\_day0\_NTD-S2

MFVFLVLLPLVSSQCVNLTTRTQLPPAYTNSFTRGVYYPDKVFRSSVLHSTQDLFLPFFSNVTFHAIHV  
SGTNGTKRFDNPVLPFNDGVYFASTEKSNIIRGWIFGTTLDSTQSLIIVNNATNVVIVKCEFCNDPF  
LGVYYHKNNKSWMESEFRVYSSANNCTFEYVSQPFLMDLEGKQGNFKNLREFVFKNIDGYFKIYSKHTPI  
NLVRDLPQGFSALEPLVDLPIGINITRFQTLALHRSYLPDGFSSGWTAGAAAYVGYLQPRTFLLKYN  
ENGTITDAVDCALDPLSETKCTLSFTVEKGIYQTSNFRVQPTESIVRFPNITNLCPFGEVFNATRFASV  
YAWNRKRISNCVADYSVLYNSASFSTFKCYGVSPTKLNLDLCTNVYADSFVIRGDEVQRQIAPGQTGKIAD  
YNYKLPDDFTGCVIAWNSNNLDSKVGGNLYRFRKSNLKPFERDISTEIQAGSTPCNGVKGFCYF  
PLQSYGFQPTNGVGYQPYRVVLSFELLHAPATVCGPKKSTNLVKNKCVNFNGLTGTGVLTESNKKFL  
PFQQFGRDIADTTDAVRDPQTLEILDITPCSFSGVSVITPGTNTSNQVAVLYQGVNCTEVPVAIHADQLT  
PTWRVYSTGSNVFQTRAGCLIGAHEVNNSYECDIPIGAGICASYQTQTNPRRARSVASQSIIAYTMSLG  
AENSVAYSNNNSIAIPTNFTISVTTEILPVSMTKTSVDCTMYICGDSTECSNLLLQYGSFCTQLNRALTGI  
AVEQDKNTQEVFAQVKQIYKTPPIKDFGGFNFSQILPDPSPKPSX

>B2\_2\_NP\_day3\_NTD-S2

MFVFLVLLPLVSSQCVNLTTRTQLPPAYTNSFTRGVYYPDKVFRSSVLHSTQDLFLPFFSNVTFHAIHV  
SGTNGTKRFDNPVLPFNDGVYFASTEKSNIIRGWIFGTTLDSTQSLIIVNNATNVVIVKCEFCNDPF  
LGVYYHKNNKSWMESEFRVYSSANNCTFEYVSQPFLMDLEGKQGNFKNLREFVFKNIDGYFKIYSKHTPI  
NLVRDLPQGFSALEPLVDLPIGINITRFQTLALHRSYLPDGFSSGWTAGAAAYVGYLQPRTFLLKYN  
ENGTITDAVDCALDPLSETKCTLSFTVEKGIYQTSNFRVQPTESIVRFPNITNLCPFGEVFNATRFASV  
YAWNRKRISNCVADYSVLYNSASFSTFKCYGVSPTKLNLDLCTNVYADSFVIRGDEVQRQIAPGQTGKIAD  
YNYKLPDDFTGCVIAWNSNNLDSKVGGNLYRFRKSNLKPFERDISTEIQAGSTPCNGVKGFCYF  
PLQSYGFQPTNGVGYQPYRVVLSFELLHAPATVCGPKKSTNLVKNKCVNFNGLTGTGVLTESNKKFL  
PFQQFGRDIADTTDAVRDPQTLEILDITPCSFSGVSVITPGTNTSNQVAVLYQGVNCTEVPVAIHADQLT  
PTWRVYSTGSNVFQTRAGCLIGAHEVNNSYECDIPIGAGICASYQTQTNPRRARSVASQSIIAYTMSLG  
AENSVAYSNNNSIAIPTNFTISVTTEILPVSMTKTSVDCTMYICGDSTECSNLLLQYGSFCTQLNRALTGI  
AVEQDKNTQEVFAQVKQIYKTPPIKDFGGFNFSQILPDPSPKPSX

>B2\_2\_NP\_day7\_NTD-S2

MFVFLVLLPLVSSQCVNLTTRTQLPPAYTNSFTRGVYYPDKVFRSSVLHSTQDLFLPFFSNVTFHAIHV  
SGTNGTKRFDNPVLPFNDGVYFASTEKSNIIRGWIFGTTLDSTQSLIIVNNATNVVIVKCEFCNDPF  
LGVYYHKNNKSWMESEFRVYSSANNCTFEYVSQPFLMDLEGKQGNFKNLREFVFKNIDGYFKIYSKHTPI  
NLVRDLPQGFSALEPLVDLPIGINITRFQTLALHRSYLPDGFSSGWTAGAAAYVGYLQPRTFLLKYN  
ENGTITDAVDCALDPLSETKCTLSFTVEKGIYQTSNFRVQPTESIVRFPNITNLCPFGEVFNATRFASV  
YAWNRKRISNCVADYSVLYNSASFSTFKCYGVSPTKLNLDLCTNVYADSFVIRGDEVQRQIAPGQTGKIAD  
YNYKLPDDFTGCVIAWNSNNLDSKVGGNLYRFRKSNLKPFERDISTEIQAGSTPCNGVQGFNCYF  
PLQSYGFQPTNGVGYQPYRVVLSFELLHAPATVCGPKKSTNLVKNKCVNFNGLTGTGVLTESNKKFL  
PFQQFGRDIADTTDAVRDPQTLEILDITPCSFSGVSVITPGTNTSNQVAVLYQGVNCTEVPVAIHADQLT  
PTWRVYSTGSNVFQTRAGCLIGAHEVNNSYECDIPIGAGICASYQTQTNPRRARSVASQSIIAYTMSLG  
AENSVAYSNNNSIAIPTNFTISVTTEILPVSMTKTSVDCTMYICGDSTECSNLLLQYGSFCTQLNRALTGI  
AVEQDKNTQEVFAQVKQIYKTPPIKDFGGFNFSQILPDPSPKPSX

>B2\_2\_NP\_day14\_NTD-S2

MFVFLVLLPLVSSQCVNLTTRTQLPPAYTNSFTRGVYYPDKVFRSSVLHSTQDLFLPFFSNVTFHAIHV  
SGTNGTKRFDNPVLPFNDGVYFASTEKSNIIRGWIFGTTLDSTQSLIIVNNATNVVIVKCEFCNDPF  
LGVYYHKNNKSWMESEFRVYSSANNCTFEYVSQPFLMDLEGKQGNFKNLREFVFKNIDGYFKIYSKHTPI  
NLVRDLPQGFSALEPLVDLPIGINITRFQTLALHRSYLPDGFSSGWTAGAAAYVGYLQPRTFLLKYN  
ENGTITDAVDCALDPLSETKCTLSFTVEKGIYQTSNFRVQPTESIVRFPNITNLCPFGEVFNATRFASV  
YAWNRKRISNCVADYSVLYNSASFSTFKCYGVSPTKLNLDLCTNVYADSFVIRGDEVQRQIAPGQTGKIAD  
YNYKLPDDFTGCVIAWNSNNLDSKVGGNLYRFRKSNLKPFERDISTEIQAGSTPCNGVKGFCYF  
PLQSYGFQPTNGVGYQPYRVVLSFELLHAPATVCGPKKSTNLVKNKCVNFNGLTGTGVLTESNKKFL  
PFQQFGRDIADTTDAVRDPQTLEILDITPCSFSGVSVITPGTNTSNQVAVLYQGVNCTEVPVAIHADQLT  
PTWRVYSTGSNVFQTRAGCLIGAHEVNNSYECDIPIGAGICASYQTQTNPRRARSVASQSIIAYTMSLG

AENSVAYSNNSIAIPTNFTISVTTEILPVSMKTSVDCTMYICGDSTEC SNLLLQYGSFCTQLNRALTGI  
AVEQDKNTQEVFAQVKQIYKTPPIKDFGGFNFSQILPDP SKPSX

>B2\_3\_AN\_day0\_NTD-S2

MFVFLVLLPLVSSQCVNLTTRTQLPPAYTNSFTRGVYYPDKVFRSSVLHSTQDLFLPFFSNVTWFHAIHV  
SGTNGTKRFDNPVLPFNDGVYFASTEKSNIIRGWIFGTTLD SKTQSLLIVNNATNVVIKVCEFQFCNHFP  
LGVYYHKNNKSWMESEFRVYSSANNCTFEYVSQPFLMDLE GKQGNFKNLREFVFNIDGYFKIYSKHTPI  
NLVRDL PQGFSALEPLVDLPIGINITRFQTL LALHRSYLT PGDSSSGWTAGAAAYVGYLQPRTFLLKYN  
ENGTITDAVDCALDPLSETKCTLKSFTVEKGIYQTSNFRVQPTESIVRFPNITNLCPFGEVFNATRFASV  
YAWNRKRISNCVADYSVLVNSASFSTFKCYGVSPTKLN DLCTNVYADSFVIRGDEV RQIAPGQTGKIAD  
YNYKLPDDFTGCVIAWNSNNLDSKVGGNYNLYRLFRKSNL KPFERDISTEYQAGSTPCNGVEGFNCYF  
PLQSYGFQPTNGVGYQPYRVVLSFELLHAPATVCGPKKSTNLVKNKCVNFNFNGLTGTGVLTESNKKFL  
PFQQFGRDIADTTDAVRDPQTLEILDITPCSFGGVS VITPGTNTSNQVAVLYQGVNCTEVPVAIHADQLT  
PTWRVYSTGSNVFQTRAGCLIGAHEVNNSYECDIPIGAGI CASYQTQTNSPRRARSVASQSIIAYTMSLG  
AENSVAYSNNSIAIPTNFTISVTTEILPVSMKTSVDCTMYICGDSTEC SNLLLQYGSFCTQLNRALTGI  
AVEQDKNTQEVFAQVKQIYKTPPIKDFGGFNFSQILPDP SKPSX

>B2\_3\_AN\_day1\_NTD-S2

MFVFLVLLPLVSSQCVNLTTRTQLPPAYTNSFTRGVYYPDKVFRSSVLHSTQDLFLPFFSNVTWFHAIHV  
SGTNGTKRFDNPVLPFNDGVYFASTEKSNIIRGWIFGTTLD SKTQSLLIVNNATNVVIKVCEFQFCNHFP  
LGVYYHKNNKSWMESEFRVYSSANNCTFEYVSQPFLMDLE GKQGNFKNLREFVFNIDGYFKIYSKHTPI  
NLVRDL PQGFSALEPLVDLPIGINITRFQTL LALHRSYLT PGDSSSGWTAGAAAYVGYLQPRTFLLKYN  
ENGTITDAVDCALDPLSETKCTLKSFTVEKGIYQTSNFRVQPTESIVRFPNITNLCPFGEVFNATRFASV  
YAWNRKRISNCVADYSVLVNSASFSTFKCYGVSPTKLN DLCTNVYADSFVIRGDEV RQIAPGQTGKIAD  
YNYKLPDDFTGCVIAWNSNNLDSKVGGNYNLYRLFRKSNL KPFERDISTEYQAGSTPCNGVEGFNCYF  
PLQSYGFQPTNGVGYQPYRVVLSFELLHAPATVCGPKKSTNLVKNKCVNFNFNGLTGTGVLTESNKKFL  
PFQQFGRDIADTTDAVRDPQTLEILDITPCSFGGVS VITPGTNTSNQVAVLYQGVNCTEVPVAIHADQLT  
PTWRVYSTGSNVFQTRAGCLIGAHEVNNSYECDIPIGAGI CASYQTQTNSPRRARSVASQSIIAYTMSLG  
AENSVAYSNNSIAIPTNFTISVTTEILPVSMKTSVDCTMYICGDSTEC SNLLLQYGSFCTQLNRALTGI  
AVEQDKNTQEVFAQVKQIYKTPPIKDFGGFNFSQILPDP SKPSX

>B2\_3\_AN\_day2\_NTD-S2

MFVFLVLLPLVSSQCVNLTTRTQLPPAYTNSFTRGVYYPDKVFRSSVLHSTQDLFLPFFSNVTWFHAIHV  
SGTNGTKRFDNPVLPFNDGVYFASTEKSNIIRGWIFGTTLD SKTQSLLIVNNATNVVIKVCEFQFCNHFP  
LGVYYHKNNKSWMESEFRVYSSANNCTFEYVSQPFLMDLE GKQGNFKNLREFVFNIDGYFKIYSKHTPI  
NLVRDL PQGFSALEPLVDLPIGINITRFQTL LALHRSYLT PGDSSSGWTAGAAAYVGYLQPRTFLLKYN  
ENGTITDAVDCALDPLSETKCTLKSFTVEKGIYQTSNFRVQPTESIVRFPNITNLCPFGEVFNATRFASV  
YAWNRKRISNCVADYSVLVNSASFSTFKCYGVSPTKLN DLCTNVYADSFVIRGDEV RQIAPGQTGKIAD  
YNYKLPDDFTGCVIAWNSNNLDSKVGGNYNLYRLFRKSNL KPFERDISTEYQAGSTPCNGVEGFNCYF  
PLQSYGFQPTNGVGYQPYRVVLSFELLHAPATVCGPKKSTNLVKNKCVNFNFNGLTGTGVLTESNKKFL  
PFQQFGRDIADTTDAVRDPQTLEILDITPCSFGGVS VITPGTNTSNQVAVLYQGVNCTEVPVAIHADQLT  
PTWRVYSTGSNVFQTRAGCLIGAHEVNNSYECDIPIGAGI CASYQTQTNSPRRARSVASQSIIAYTMSLG  
AENSVAYSNNSIAIPTNFTISVTTEILPVSMKTSVDCTMYICGDSTEC SNLLLQYGSFCTQLNRALTGI  
AVEQDKNTQEVFAQVKQIYKTPPIKDFGGFNFSQILPDP SKPSX

>B2\_3\_AN\_day3\_NTD-S2

MFVFLVLLPLVSSQCVNLTTRTQLPPAYTNSFTRGVYYPDKVFRSSVLHSTQDLFLPFFSNVTWFHAIHV  
SGTNGTKRFDNPVLPFNDGVYFASTEKSNIIRGWIFGTTLD SKTQSLLIVNNATNVVIKVCEFQFCNHFP  
LGVYYHKNNKSWMESEFRVYSSANNCTFEYVSQPFLMDLE GKQGNFKNLREFVFNIDGYFKIYSKHTPI  
NLVRDL PQGFSALEPLVDLPIGINITRFQTL LALHRSYLT PGDSSSGWTAGAAAYVGYLQPRTFLLKYN  
ENGTITDAVDCALDPLSETKCTLKSFTVEKGIYQTSNFRVQPTESIVRFPNITNLCPFGEVFNATRFASV  
YAWNRKRISNCVADYSVLVNSASFSTFKCYGVSPTKLN DLCTNVYADSFVIRGDEV RQIAPGQTGKIAD  
YNYKLPDDFTGCVIAWNSNNLDSKVGGNYNLYRLFRKSNL KPFERDISTEYQAGSTPCNGVEGFNCYF  
PLQSYGFQPTNGVGYQPYRVVLSFELLHAPATVCGPKKSTNLVKNKCVNFNFNGLTGTGVLTESNKKFL

PFQQFGRDIADTTDAVRDPQTLLEILDITPCSFGGVSVITPGTNTSNQVAVLYQGVNCTEVPVAIHADQLT  
PTWRVYSTGSNVFQTRAGCLIGAHEVNNSYECDIPIGAGICASYQTQTNSPRRARSVASQSIIAYTMSLG  
AENSVAYSNNSIAIPTNFTISVTTEILPVSMTKTSVDCTMYICGDSTECSNLLLQYGSFCTQLNRALTGI  
AVEQDKNTQEVFAQVKQIYKTPPIKDFGGFNFSQILPDPSPKPSX

>B2\_3\_AN\_day4\_NTD-S2

MFVFLVLLPLVSSQCVNLTTTRTQLPPAYTNSFTRGVYYPDKVFRSSVLHSTQDLFLPFFSNVTWFHAIHV  
SGTNGTKRFDNPVLPFNDGVYFASTEKSNIIRGWI FGTTLD SKTQSLLIVNNATNVVIVKCEQFCNHFP  
LGVYYHKNNKSWMESEFRVYSSANNCTFEYVSQPFLMDLEGKQGNFKNLREFVFNIDGYFKIYSKHTPI  
NLVRDL PQGFSALEPLVDLPIGINITRFQTL LALHRSYLP GDSSSGWTAGAAAYVGYLQPRTFLLKYN  
ENGTITDAVDCALDPLSETKCTLKSFTVEKGIYQTSNFRVQPTESIVRFPNITNLCPFGEVFNATRFASV  
YAWNRKRISNCVADYSVLVNSASFSTFKCYGVSPTKLNLDLCTNVYADSFVIRGDEVRQIAPGQTGKIAD  
YNYKLPDDFTGCVIAWNSNNLDSKVGGNLYR LFRKSNLKPFERDISTEIQAGSTPCNGVKGFNCYF  
PLQSYGFQPTNGVGYQPYRVVLSFELLHAPATVCGPKKSTNLVKNKCVNFNGLTGTGVLTESNKKFL  
PFQQFGRDIADTTDAVRDPQTLLEILDITPCSFGGVSVITPGTNTSNQVAVLYQGVNCTEVPVAIHADQLT  
PTWRVYSTGSNVFQTRAGCLIGAHEVNNSYECDIPIGAGICASYQTQTNSPRRARSVASQSIIAYTMSLG  
AENSVAYSNNSIAIPTNFTISVTTEILPVSMTKTSVDCTMYICGDSTECSNLLLQYGSFCTQLNRALTGI  
AVEQDKNTQEVFAQVKQIYKTPPIKDFGGFNFSQILPDPSPKPSX

>B2\_3\_AN\_day5\_NTD-S2

MFVFLVLLPLVSSQCVNLTTTRTQLPPAYTNSFTRGVYYPDKVFRSSVLHSTQDLFLPFFSNVTWFHAIHV  
SGTNGTKRFDNPVLPFNDGVYFASTEKSNIIRGWI FGTTLD SKTQSLLIVNNATNVVIVKCEQFCNHFP  
LGVYYHKNNKSWMESEFRVYSSANNCTFEYVSQPFLMDLEGKQGNFKNLREFVFNIDGYFKIYSKHTPI  
NLVRDL PQGFSALEPLVDLPIGINITRFQTL LALHRSYLP GDSSSGWTAGAAAYVGYLQPRTFLLKYN  
ENGTITDAVDCALDPLSETKCTLKSFTVEKGIYQTSNFRVQPTESIVRFPNITNLCPFGEVFNATRFASV  
YAWNRKRISNCVADYSVLVNSASFSTFKCYGVSPTKLNLDLCTNVYADSFVIRGDEVRQIAPGQTGKIAD  
YNYKLPDDFTGCVIAWNSNNLDSKVGGNLYR LFRKSNLKPFERDISTEIQAGSTPCNGVKGFNCYF  
PLQSYGFQPTNGVGYQPYRVVLSFELLHAPATVCGPKKSTNLVKNKCVNFNGLTGTGVLTESNKKFL  
PFQQFGRDIADTTDAVRDPQTLLEILDITPCSFGGVSVITPGTNTSNQVAVLYQGVNCTEVPVAIHADQLT  
PTWRVYSTGSNVFQTRAGCLIGAHEVNNSYECDIPIGAGICASYQTQTNSPRRARSVASQSIIAYTMSLG  
AENSVAYSNNSIAIPTNFTISVTTEILPVSMTKTSVDCTMYICGDSTECSNLLLQYGSFCTQLNRALTGI  
AVEQDKNTQEVFAQVKQIYKTPPIKDFGGFNFSQILPDPSPKPSX

>B2\_3\_AN\_day7\_NTD-S2

MFVFLVLLPLVSSQCVNLTTTRTQLPPAYTNSFTRGVYYPDKVFRSSVLHSTQDLFLPFFSNVTWFHAIHV  
SGTNGTKRFDNPVLPFNDGVYFASTEKSNIIRGWI FGTTLD SKTQSLLIVNNATNVVIVKCEQFCNHFP  
LGVYYHKNNKSWMESEFRVYSSANNCTFEYVSQPFLMDLEGKQGNFKNLREFVFNIDGYFKIYSKHTPI  
NLVRDL PQGFSALEPLVDLPIGINITRFQTL LALHRSYLP GDSSSGWTAGAAAYVGYLQPRTFLLKYN  
ENGTITDAVDCALDPLSETKCTLKSFTVEKGIYQTSNFRVQPTESIVRFPNITNLCPFGEVFNATRFASV  
YAWNRKRISNCVADYSVLVNSASFSTFKCYGVSPTKLNLDLCTNVYADSFVIRGDEVRQIAPGQTGKIAD  
YNYKLPDDFTGCVIAWNSNNLDSKVGGNLYR LFRKSNLKPFERDISTEIQAGSTPCNGVKGFNCYF  
PLQSYGFQPTNGVGYQPYRVVLSFELLHAPATVCGPKKSTNLVKNKCVNFNGLTGTGVLTESNKKFL  
PFQQFGRDIADTTDAVRDPQTLLEILDITPCSFGGVSVITPGTNTSNQVAVLYQGVNCTEVPVAIHADQLT  
PTWRVYSTGSNVFQTRAGCLIGAHEVNNSYECDIPIGAGICASYQTQTNSPRRARSVASQSIIAYTMSLG  
AENSVAYSNNSIAIPTNFTISVTTEILPVSMTKTSVDCTMYICGDSTECSNLLLQYGSFCTQLNRALTGI  
AVEQDKNTQEVFAQVKQIYKTPPIKDFGGFNFSQILPDPSPKPSX

>B2\_3\_AN\_day8\_NTD-S2

MFVFLVLLPLVSSQCVNLTTTRTQLPPAYTNSFTRGVYYPDKVFRSSVLHSTQDLFLPFFSNVTWFHAIHV  
SGTNGTKRFDNPVLPFNDGVYFASTEKSNIIRGWI FGTTLD SKTQSLLIVNNATNVVIVKCEQFCNHFP  
LGVYYHKNNKSWMESEFRVYSSANNCTFEYVSQPFLMDLEGKQGNFKNLREFVFNIDGYFKIYSKHTPI  
NLVRDL PQGFSALEPLVDLPIGINITRFQTL LALHRSYLP GDSSSGWTAGAAAYVGYLQPRTFLLKYN  
ENGTITDAVDCALDPLSETKCTLKSFTVEKGIYQTSNFRVQPTESIVRFPNITNLCPFGEVFNATRFASV  
YAWNRKRISNCVADYSVLVNSASFSTFKCYGVSPTKLNLDLCTNVYADSFVIRGDEVRQIAPGQTGKIAD

YNYKLPDDFTGCVIAWNSNNLDSKVGGNLYRLFRKSNLKPFERDISTEIQAGSTPCNGVKGFNCYF  
PLQSYGFQPTNGVGYQPYRVVLSFELLHAPATVCGPKKSTNLVKNKCVNFNFNGLTGTGVLTESNKKFL  
PFQQFGRDIADTTDAVRDPQTLEILDITPCSFGGVSVITPGTNTSNQVAVLYQGVNCTEVPVAIHADQLT  
PTWRVYSTGSNVFQTRAGCLIGAHEVNNSYECDIPIGAGICASYQTQTNPPRRARSVASQSIIAYTMSLG  
AENSVAYSNNNSIAIPTNFTISVTTEILPVSMTKTSVDCTMYICGDSTECSNLLLQYGSFCTQLNRALTGI  
AVEQDKNTQEVFAQVKQIYKTPPIKDFGGFNFSQILPDPSPKPSX

>B2\_3\_AN\_day9\_NTD-S2

MFVFLVLLPLVSSQCVNLTTTRTQLPPAYTNSFTRGVYYPDKVFRSSVLHSTQDLFLPFFSNVTWFHAIHV  
SGTNGTKRFDNPVLPFNDGVYFASTSEKSNIRGWIFGTTLDSTQSLIVNNATNVVIVKCEQFCNHPF  
LGVYHKNKNSWMESEFRVYSSANNCTFEYVSQPFLMDLEGKQGNFKNLREFVFNIDGYFKIYSKHTPI  
NLVRDLPQGFSALEPLVDLPIGINITRFQTLALHRSYLTGDSGWTAGAAAYVGYLQPRTFLLKYN  
ENGTITDAVDCALDPLSETKCTLKSFTVEKGIYQTSNFRVQPTESIVRFPNITNLCPFGEVFNATRFASV  
YAWNRKRISNCVADYSVLVNSASFSTFKCYGVSPTKLNLDLCTNVYADSFVIRGDEVQRQIAPGQTGKIAD  
YNYKLPDDFTGCVIAWNSNNLDSKVGGNLYRLFRKSNLKPFERDISTEIQAGSTPCNGVKGFNCYF  
PLQSYGFQPTNGVGYQPYRVVLSFELLHAPATVCGPKKSTNLVKNKCVNFNFNGLTGTGVLTESNKKFL  
PFQQFGRDIADTTDAVRDPQTLEILDITPCSFGGVSVITPGTNTSNQVAVLYQGVNCTEVPVAIHADQLT  
PTWRVYSTGSNVFQTRAGCLIGAHEVNNSYECDIPIGAGICASYQTQTNPPRRARSVASQSIIAYTMSLG  
AENSVAYSNNNSIAIPTNFTISVTTEILPVSMTKTSVDCTMYICGDSTECSNLLLQYGSFCTQLNRALTGI  
AVEQDKNTQEVFAQVKQIYKTPPIKDFGGFNFSQILPDPSPKPSX

>B2\_3\_AN\_day10\_NTD-S2

MFVFLVLLPLVSSQCVNLTTTRTQLPPAYTNSFTRGVYYPDKVFRSSVLHSTQDLFLPFFSNVTWFHAIHV  
SGTNGTKRFDNPVLPFNDGVYFASTSEKSNIRGWIFGTTLDSTQSLIVNNATNVVIVKCEQFCNHPF  
LGVYHKNKNSWMESEFRVYSSANNCTFEYVSQPFLMDLEGKQGNFKNLREFVFNIDGYFKIYSKHTPI  
NLVRDLPQGFSALEPLVDLPIGINITRFQTLALHRSYLTGDSGWTAGAAAYVGYLQPRTFLLKYN  
ENGTITDAVDCALDPLSETKCTLKSFTVEKGIYQTSNFRVQPTESIVRFPNITNLCPFGEVFNATRFASV  
YAWNRKRISNCVADYSVLVNSASFSTFKCYGVSPTKLNLDLCTNVYADSFVIRGDEVQRQIAPGQTGKIAD  
YNYKLPDDFTGCVIAWNSNNLDSKVGGNLYRLFRKSNLKPFERDISTEIQAGSTPCNGVKGFNCYF  
PLQSYGFQPTNGVGYQPYRVVLSFELLHAPATVCGPKKSTNLVKNKCVNFNFNGLTGTGVLTESNKKFL  
PFQQFGRDIADTTDAVRDPQTLEILDITPCSFGGVSVITPGTNTSNQVAVLYQGVNCTEVPVAIHADQLT  
PTWRVYSTGSNVFQTRAGCLIGAHEVNNSYECDIPIGAGICASYQTQTNPPRRARSVASQSIIAYTMSLG  
AENSVAYSNNNSIAIPTNFTISVTTEILPVSMTKTSVDCTMYICGDSTECSNLLLQYGSFCTQLNRALTGI  
AVEQDKNTQEVFAQVKQIYKTPPIKDFGGFNFSQILPDPSPKPSX

>B2\_3\_AN\_day11\_NTD-S2

MFVFLVLLPLVSSQCVNLTTTRTQLPPAYTNSFTRGVYYPDKVSRSSVLHSTQDLFLPFFSNVTWFHAIHV  
SGTNGTKRFDNPVLPFNDGVYFASTSEKSNIRGWIFGTTLDSTQSLIVNNATNVVIVKCEQFCNHPF  
LGVYHKNKNSWMESEFRVYSSANNCTFEYVSQPFLMDLEGKQGNFKNLREFVFNIDGYFKIYSKHTPI  
NLVRDLPQGFSALEPLVDLPIGINITRFQTLALHRSYLTGDSGWTAGAAAYVGYLQPRTFLLKYN  
ENGTITDAVDCALDPLSETKCTLKSFTVEKGIYQTSNFRVQPTESIVRFPNITNLCPFGEVFNATRFASV  
YAWNRKRISNCVADYSVLVNSASFSTFKCYGVSPTKLNLDLCTNVYADSFVIRGDEVQRQIAPGQTGKIAD  
YNYKLPDDFTGCVIAWNSNNLDSKVGGNLYRLFRKSNLKPFERDISTEIQAGSTPCNGVKGFNCYF  
PLQSYGFQPTNGVGYQPYRVVLSFELLHAPATVCGPKKSTNLVKNKCVNFNFNGLTGTGVLTESNKKFL  
PFQQFGRDIADTTDAVRDPQTLEILDITPCSFGGVSVITPGTNTSNQVAVLYQGVNCTEVPVAIHADQLT  
PTWRVYSTGSNVFQTRAGCLIGAHEVNNSYECDIPIGAGICASYQTQTNPPRRARSVASQSIIAYTMSLG  
AENSVAYSNNNSIAIPTNFTISVTTEILPVSMTKTSVDCTMYICGDSTECSNLLLQYGSFCTQLNRALTGI  
AVEQDKNTQEVFAQVKQIYKTPPIKDFGGFNFSQILPDPSPKPSX

>B2\_3\_AN\_day12\_NTD-S2

MFVFLVLLPLVSSQCVNLTTTRTQLPPAYTNSFTRGVYYPDKVFRSSVLHSTQDLFLPFFSNVTWFHAIHV  
SGTNGTKRFDNPVLPFNDGVYFASTSEKSNIRGWIFGTTLDSTQSLIVNNATNVVIVKCEQFCNHPF  
LGVYHKNKNSWMESEFRVYSSANNCTFEYVSQPFLMDLEGKQGNFKNLREFVFNIDGYFKIYSKHTPI  
NLVRDLPQGFSALEPLVDLPIGINITRFQTLALHRSYLTGDSGWTAGAAAYVGYLQPRTFLLKYN

ENGTITDAVDCALDPLSETKCTLKSFTVEKGIYQTSNFRVQPTESIVRFPNITNLCPFGEVFNATRFASV  
YAWNRKRISNCVADYSVLVNSASFSTFKCYGVSPTKLNLDLCTNVYADSFVIRGDEVQRQIAPGQTGKIAD  
YNYKLPDDFTGCVIAWNSNNLDSKVGGNLYRLLFRKSNLKPFERDISTEIQAGSTPCNGVKGFNFCYF  
PLQSYGFQPTNGVGYQPYRVVLSFELLHAPATVCGPKKSTNLVKNKCVNFNFNGLTGTGVLTESNKKFL  
PFQQFGRDIADTTDAVRDPQTLEILDITPCSFGGVSITPGTNTSNQVAVLYQGVNCTEVPVAIHADQLT  
PTWRVYSTGSNVFQTRAGCLIGAHEVNNSYECDIPIGAGICASYQTQTNPRRARSVASQSIIAYTMSLG  
AENSVAYSNNNSIAIPTNFTISVTTEILPVSMTKTSVDCTMYICGDSTECSNLLLQYGSFCTQLNRALTGI  
AVEQDKNTQEVFAQVKQIYKTPPIKDFGGFNFSQILPDPSKPSX

>B2\_3\_NP\_day0\_NTD-S2

MFVFLVLLPLVSSQCVNLTTTRTQLPPAYTNSFTRGVYYPDKVFRSSVLHSTQDLFLPFFSNVTFHAIHV  
SGTNGTKRFDNPVLPFNDGVYFASTEKSNIIRGWIFGTTLDLSDKTSQSLIVNNATNVVIVKCEVFQFCNHFP  
LGVYYHKNNKSWMESEFRVYSSANNCTFEYVSQPFLMDLEGKQGNFKNLREFVFNIDGYFKIYSKHTPI  
NLVRDLPOGFSALEPLVDLPIGINITRFQTLALHRSYLTGDDSSSGWTAGAAAYVGYLQPRTFLLKYN  
ENGTITDAVDCALDPLSETKCTLKSFTVEKGIYQTSNFRVQPTESIVRFPNITNLCPFGEVFNATRFASV  
YAWNRKRISNCVADYSVLVNSASFSTFKCYGVSPTKLNLDLCTNVYADSFVIRGDEVQRQIAPGQTGKIAD  
YNYKLPDDFTGCVIAWNSNNLDSKVGGNLYRLLFRKSNLKPFERDISTEIQAGSTPCNGVEGFNFCYF  
PLQSYGFQPTNGVGYQPYRVVLSFELLHAPATVCGPKKSTNLVKNKCVNFNFNGLTGTGVLTESNKKFL  
PFQQFGRDIADTTDAVRDPQTLEILDITPCSFGGVSITPGTNTSNQVAVLYQGVNCTEVPVAIHADQLT  
PTWRVYSTGSNVFQTRAGCLIGAHEVNNSYECDIPIGAGICASYQTQTNPRRARSVASQSIIAYTMSLG  
AENSVAYSNNNSIAIPTNFTISVTTEILPVSMTKTSVDCTMYICGDSTECSNLLLQYGSFCTQLNRALTGI  
AVEQDKNTQEVFAQVKQIYKTPPIKDFGGFNFSQILPDPSKPSX

>B2\_3\_NP\_day3\_NTD-S2

MFVFLVLLPLVSSQCVNLTTTRTQLPPAYTNSFTRGVYYPDKVFRSSVLHSTQDLFLPFFSNVTFHAIHV  
SGTNGTKRFDNPVLPFNDGVYFASTEKSNIIRGWIFGTTLDLSDKTSQSLIVNNATNVVIVKCEVFQFCNHFP  
LGVYYHKNNKSWMESEFRVYSSANNCTFEYVSQPFLMDLEGKQGNFKNLREFVFNIDGYFKIYSKHTPI  
NLVRDLPOGFSALEPLVDLPIGINITRFQTLALHRSYLTGDDSSSGWTAGAAAYVGYLQPRTFLLKYN  
ENGTITDAVDCALDPLSETKCTLKSFTVEKGIYQTSNFRVQPTESIVRFPNITNLCPFGEVFNATRFASV  
YAWNRKRISNCVADYSVLVNSASFSTFKCYGVSPTKLNLDLCTNVYADSFVIRGDEVQRQIAPGQTGKIAD  
YNYKLPDDFTGCVIAWNSNNLDSKVGGNLYRLLFRKSNLKPFERDISTEIQAGSTPCNGVEGFNFCYF  
PLQSYGFQPTNGVGYQPYRVVLSFELLHAPATVCGPKKSTNLVKNKCVNFNFNGLTGTGVLTESNKKFL  
PFQQFGRDIADTTDAVRDPQTLEILDITPCSFGGVSITPGTNTSNQVAVLYQGVNCTEVPVAIHADQLT  
PTWRVYSTGSNVFQTRAGCLIGAHEVNNSYECDIPIGAGICASYQTQTNPRRARSVASQSIIAYTMSLG  
AENSVAYSNNNSIAIPTNFTISVTTEILPVSMTKTSVDCTMYICGDSTECSNLLLQYGSFCTQLNRALTGI  
AVEQDKNTQEVFAQVKQIYKTPPIKDFGGFNFSQILPDPSKPSX

>B2\_3\_NP\_day7\_NTD-S2

MFVFLVLLPLVSSQCVNLTTTRTQLPPAYTNSFTRGVYYPDKVFRSSVLHSTQDLFLPFFSNVTFHAIHV  
SGTNGTKRFDNPVLPFNDGVYFASTEKSNIIRGWIFGTTLDLSDKTSQSLIVNNATNVVIVKCEVFQFCNHFP  
LGVYYHKNNKSWMESEFRVYSSANNCTFEYVSQPFLMDLEGKQGNFKNLREFVFNIDGYFKIYSKHTPI  
NLVRDLPOGFSALEPLVDLPIGINITRFQTLALHRSYLTGDDSSSGWTAGAAAYVGYLQPRTFLLKYN  
ENGTITDAVDCALDPLSETKCTLKSFTVEKGIYQTSNFRVQPTESIVRFPNITNLCPFGEVFNATRFASV  
YAWNRKRISNCVADYSVLVNSASFSTFKCYGVSPTKLNLDLCTNVYADSFVIRGDEVQRQIAPGQTGKIAD  
YNYKLPDDFTGCVIAWNSNNLDSKVGGNLYRLLFRKSNLKPFERDISTEIQAGSTPCNGVKGFNFCYF  
PLQSYGFQPTNGVGYQPYRVVLSFELLHAPATVCGPKKSTNLVKNKCVNFNFNGLTGTGVLTESNKKFL  
PFQQFGRDIADTTDAVRDPQTLEILDITPCSFGGVSITPGTNTSNQVAVLYQGVNCTEVPVAIHADQLT  
PTWRVYSTGSNVFQTRAGCLIGAHEVNNSYECDIPIGAGICASYQTQTNPRRARSVASQSIIAYTMSLG  
AENSVAYSNNNSIAIPTNFTISVTTEILPVSMTKTSVDCTMYICGDSTECSNLLLQYGSFCTQLNRALTGI  
AVEQDKNTQEVFAQVKQIYKTPPIKDFGGFNFSQILPDPSKPSX

>B2\_3\_NP\_day14\_NTD-S2

MFVFLVLLPLVSSQCVNLTTTRTQLPPAYTNSFTRGVYYPDKVFRSSVLHSTQDLFLPFFSNVTFHAIHV  
SGTNGTKRFDNPVLPFNDGVYFASTEKSNIIRGWIFGTTLDLSDKTSQSLIVNNATNVVIVKCEVFQFCNHFP

LGVYYHKNNKSWMESEFRVYSSANNCTFEYVSQPFLMDLEGKQGNFKNLREFVFKNIDGYFKIYSKHTPI  
NLVRDLPQGFSALEPLVDLPIGINITRFQTLALHRSYLT PGDSSSGWTAGAAAYYVGYLQPRTFLLKYN  
ENGTITDAVDCALDPLSETKCTLSFTVEKGIYQTSNFRVQPTESIVRFPNITNLCPFGEVFNATRFASV  
YAWNRKRISNCVADYSVLYNSASFSTFKCYGVSPTKLNLCFTNVYADSFVIRGDEVQRQIAPGQTGKIAD  
YNYKLPDDFTGCVIAWNSNNLDSKVGGNYNYLYRLFRKSNLKPFERDISTEIQAGSTPCNGVKGFNCYF  
PLQSYGFQPTNGVGYQPYRVVLSFELLHAPATVCGPKKSTNLVKNKCVNFNFNGLTGTGVLTESNKKFL  
PFQQFGRDIADTTDAVRDPQTLEILDITPCSFGGVSVITPGTNTSNQVAVLYQGVNCTEVPVAIHADQLT  
PTWRVYSTGSNVFQTRAGCLIGAHEVNNSECDIPIGAGICASYQTQTNSPRRARSVASQSIIAYTMSLG  
AENSVAYSNNIAIPTNFTISVTTEILPVSMTKTSVDCTMYICGDSTECSNLLLQYGSFCTQLNRALTGI  
AVEQDKNTQEVFAQVKQIYKTPPIKDFGGFNFSQILPDPSKPSX
