# Supplementary material
Source: PubMed Central journal article supplement (PMC9675946)
Supplement: NIHMS1845806-supplement-1845806_SD_Fig_4.pdf [file NIHMS1845806-supplement-1845806_SD_Fig_4.pdf]

Figure4

| Primary_ID | Secondary_ID | File_name                            | Mutation | Frequency | Total_coverage | Average_coverage   | Viral_load | Sample_type | Visit_day | Phase | Dosage | Collection_date | Study_arm                    |
|------------|--------------|--------------------------------------|----------|-----------|----------------|--------------------|------------|-------------|-----------|-------|--------|-----------------|------------------------------|
| 10031013   | 11806294663  | G3_11806294663_324020w_NG3.fastq.gz  | S13I     | 99.814    | 4846.0         | 2279.7813267813300 | 2.16       | NPH         | 0.0       | 2     | 700    | 14OCT2020 12:08 | Placebo for LY3819253 700 mg |
| 10031013   | 11806294663  | G3_11806294663_324020w_NG3.fastq.gz  | W152C    | 99.647    | 849.0          | 2279.7813267813300 | 2.16       | NPH         | 0.0       | 2     | 700    | 14OCT2020 12:08 | Placebo for LY3819253 700 mg |
| 10031013   | 11806294663  | G3_11806294663_324020w_NG3.fastq.gz  | L452R    | 99.908    | 2164.0         | 2279.7813267813300 | 2.16       | NPH         | 0.0       | 2     | 700    | 14OCT2020 12:08 | Placebo for LY3819253 700 mg |
| 10031013   | 11806294663  | G3_11806294663_324020w_NG3.fastq.gz  | T602I    | 51.354    | 2216.0         | 2279.7813267813300 | 2.16       | NPH         | 0.0       | 2     | 700    | 14OCT2020 12:08 | Placebo for LY3819253 700 mg |
| 10031013   | 11806294663  | G3_11806294663_324020w_NG3.fastq.gz  | D614G    | 99.909    | 2194.0         | 2279.7813267813300 | 2.16       | NPH         | 0.0       | 2     | 700    | 14OCT2020 12:08 | Placebo for LY3819253 700 mg |
| 10031013   | 11806294663  | G3_11806294663_324020w_NG3.fastq.gz  | G769V    | 100.0     | 715.0          | 2279.7813267813300 | 2.16       | NPH         | 0.0       | 2     | 700    | 14OCT2020 12:08 | Placebo for LY3819253 700 mg |
| 10781001   | 11800009865  | 47_11800009865_323284w_ND11.fastq.gz | D614G    | 100.0     | 1141.0         | 1449.916870415650  | 5.82       | NPH         | 0.0       | 2     | 700    | 13NOV2020 12:36 | LY3819253 700mg IV           |
| 10241004   | 11800010503  | 82_11800010503_323284w_NG10.fastq.gz | T20I     | 99.924    | 1311.0         | 578.3679131483720  | 3.24       | NPH         | 0.0       | 2     | 700    | 20OCT2020 08:52 | Placebo for LY3819253 700 mg |
| 10241004   | 11800010503  | 82_11800010503_323284w_NG10.fastq.gz | D614G    | 100.0     | 394.0          | 578.3679131483720  | 3.24       | NPH         | 0.0       | 2     | 700    | 20OCT2020 08:52 | Placebo for LY3819253 700 mg |
| 10891002   | 11835748993  | 26_11835748993_323284w_NC2.fastq.gz  | H49Y     | 99.872    | 2339.0         | 1111.4798534798500 | 4.25       | NPH         | 0.0       | 2     | 700    | 06NOV2020 13:48 | LY3819253 700mg IV           |
| 10891002   | 11835748993  | 26_11835748993_323284w_NC2.fastq.gz  | D614G    | 100.0     | 890.0          | 1111.4798534798500 | 4.25       | NPH         | 0.0       | 2     | 700    | 06NOV2020 13:48 | LY3819253 700mg IV           |
| 10951001   | 11837776068  | 20_11837776068_323284w_NB8.fastq.gz  | D614G    | 100.0     | 855.0          | 994.9322799097070  | 8.23       | NPH         | 0.0       | 2     | 700    | 05NOV2020 08:05 | LY3819253 700mg IV           |
| 11061001   | 11852449866  | 12_11852449866_323284w_NA12.fastq.gz | D614G    | 99.839    | 621.0          | 727.9774614472120  | 6.9        | NPH         | 0.0       | 2     | 700    | 04NOV2020 12:00 | LY3819253 700mg IV           |
| 10111004   | 11837819149  | 62_11837819149_323284w_NF2.fastq.gz  | D614G    | 100.0     | 1388.0         | 1757.8288508557500 | 6.22       | NPH         | 0.0       | 2     | 700    | 16NOV2020 12:19 | Placebo for LY3819253 700 mg |
| 10221008   | 11839868165  | 94_11839868165_323284w_NH10.fastq.gz | A475V    | 99.791    | 957.0          | 1087.7469437652800 | 3.58       | NPH         | 0.0       | 2     | 700    | 30OCT2020 11:19 | Placebo for LY3819253 700 mg |
| 10221008   | 11839868165  | 94_11839868165_323284w_NH10.fastq.gz | D614G    | 100.0     | 787.0          | 1087.7469437652800 | 3.58       | NPH         | 0.0       | 2     | 700    | 30OCT2020 11:19 | Placebo for LY3819253 700 mg |
| 10891006   | 11848304079  | 50_11848304079_323284w_NE2.fastq.gz  | A222V    | 99.826    | 1147.0         | 1022.1236897274600 | 8.87       | NPH         | 0.0       | 2     | 700    | 16NOV2020 10:20 | LY3819253 700mg IV           |
| 10891006   | 11848304079  | 50_11848304079_323284w_NE2.fastq.gz  | D614G    | 100.0     | 899.0          | 1022.1236897274600 | 8.87       | NPH         | 0.0       | 2     | 700    | 16NOV2020 10:20 | LY3819253 700mg IV           |
| 10891006   | 11848304079  | 50_11848304079_323284w_NE2.fastq.gz  | E1111D   | 100.0     | 1.0            | 1022.1236897274600 | 8.87       | NPH         | 0.0       | 2     | 700    | 16NOV2020 10:20 | LY3819253 700mg IV           |
| 10421013   | 11816809038  | 11_11816809038_323284w_NA11.fastq.gz | D614G    | 100.0     | 498.0          | 612.5748218527320  | 5.24       | NPH         | 0.0       | 2     | 700    | 02NOV2020 09:23 | Placebo for LY3819253 700 mg |
| 10891007   | 11814700170  | 51_11814700170_323284w_NE3.fastq.gz  | D614G    | 99.758    | 413.0          | 513.8177399756990  | 3.17       | NPH         | 0.0       | 2     | 700    | 16NOV2020 15:14 | Placebo for LY3819253 700 mg |
| 10371007   | 11833579786  | 29_11833579786_323284w_NC5.fastq.gz  | T20I     | 99.806    | 2067.0         | 782.9429569266590  | 6.81       | NPH         | 0.0       | 2     | 700    | 06NOV2020 09:40 | Placebo for LY3819253 700 mg |
| 10371007   | 11833579786  | 29_11833579786_323284w_NC5.fastq.gz  | D614G    | 100.0     | 637.0          | 782.9429569266590  | 6.81       | NPH         | 0.0       | 2     | 700    | 06NOV2020 09:40 | Placebo for LY3819253 700 mg |
| 10371008   | 11833581825  | 38_11833581825_323284w_ND2.fastq.gz  | D614G    | 99.62     | 527.0          | 624.414691943128   | 8.71       | NPH         | 0.0       | 2     | 700    | 11NOV2020 12:10 | Placebo for LY3819253 700 mg |
| 10371008   | 11833581825  | 38_11833581825_323284w_ND2.fastq.gz  | P681R    | 99.438    | 356.0          | 624.414691943128   | 8.71       | NPH         | 0.0       | 2     | 700    | 11NOV2020 12:10 | Placebo for LY3819253 700 mg |
| 10511009   | 11800032517  | 84_11800032517_323284w_NG12.fastq.gz | D614G    | 100.0     | 660.0          | 906.6392638036810  | 2.91       | NPH         | 0.0       | 2     | 700    | 23OCT2020 12:22 | Placebo for LY3819253 700 mg |
| 10891005   | 11848304071  | 48_11848304071_323284w_ND12.fastq.gz | D614G    | 99.885    | 873.0          | 1168.1788321167900 | 3.32       | NPH         | 0.0       | 2     | 700    | 13NOV2020 15:45 | Placebo for LY3819253 700 mg |
| 10511010   | 11800030221  | 85_11800030221_323284w_NH1.fastq.gz  | D614G    | 99.584    | 481.0          | 581.35960591133    | 5.17       | NPH         | 0.0       | 2     | 700    | 23OCT2020 12:24 | Placebo for LY3819253 700 mg |
| 10291007   | 11800012554  | 59_11800012554_323284w_NE11.fastq.gz | D614G    | 100.0     | 1056.0         | 1295.4197384066600 | 6.08       | NAS         | 0.0       | 2     | 700    | 06NOV2020 12:28 | LY3819253 700mg IV           |
| 10371009   | 11812654214  | 52_11812654214_323284w_NE4.fastq.gz  | D614G    | 100.0     | 482.0          | 541.1631205673760  | 7.08       | NPH         | 0.0       | 2     | 700    | 16NOV2020 10:45 | Placebo for LY3819253 700 mg |
| 10371009   | 11812654214  | 52_11812654214_323284w_NE4.fastq.gz  | P681R    | 100.0     | 357.0          | 541.1631205673760  | 7.08       | NPH         | 0.0       | 2     | 700    | 16NOV2020 10:45 | Placebo for LY3819253 700 mg |
| 10891003   | 11835746953  | 27_11835746953_323284w_NC3.fastq.gz  | D614G    | 99.815    | 1084.0         | 1409.1990231990200 | 5.21       | NPH         | 0.0       | 2     | 700    | 06NOV2020 14:28 | Placebo for LY3819253 700 mg |
| 10331004   | 11839858506  | 73_11839858506_323284w_NG1.fastq.gz  | D614G    | 99.681    | 939.0          | 1100.7301587301600 | 4.9        | NPH         | 0.0       | 2     | 700    | 22OCT2020 10:48 | LY3819253 700mg IV           |
| 10331004   | 11839858506  | 73_11839858506_323284w_NG1.fastq.gz  | K814N    | 33.333    | 6.0            | 1100.7301587301600 | 4.9        | NPH         | 0.0       | 2     | 700    | 22OCT2020 10:48 | LY3819253 700mg IV           |
| 10251008   | 11854591815  | 86_11854591815_323284w_NH2.fastq.gz  | D614G    | 100.0     | 814.0          | 891.7832568807340  | 8.08       | NPH         | 0.0       | 2     | 700    | 26OCT2020 10:57 | LY3819253 700mg IV           |
| 10511008   | 11800096526  | 83_11800096526_323284w_NG11.fastq.gz | D614G    | 100.0     | 963.0          | 1247.1997621878700 | 5.87       | NPH         | 0.0       | 2     | 700    | 23OCT2020 09:37 | LY3819253 700mg IV           |
| 10951002   | 11837776070  | 31_11837776070_323284w_NC7.fastq.gz  | D614G    | 99.882    | 848.0          | 958.4004400440040  | 8.51       | NPH         | 0.0       | 2     | 700    | 09NOV2020 10:35 | LY3819253 700mg IV           |
| 10121006   | 11804195913  | 91_11804195913_323284w_NH7.fastq.gz  | D614G    | 99.795    | 487.0          | 573.5219454329770  | 6.77       | NPH         | 0.0       | 2     | 700    | 30OCT2020 11:42 | LY3819253 700mg IV           |
| 10441002   | 11821054019  | 43_11821054019_323284w_ND7.fastq.gz  | T20I     | 99.897    | 2919.0         | 1285.1791221826800 | 6.67       | NPH         | 0.0       | 2     | 700    | 12NOV2020 10:25 | LY3819253 700mg IV           |
| 10441002   | 11821054019  | 43_11821054019_323284w_ND7.fastq.gz  | D614G    | 99.901    | 1105.0         | 1285.1791221826800 | 6.67       | NPH         | 0.0       | 2     | 700    | 12NOV2020 10:25 | LY3819253 700mg IV           |
| 10441002   | 11821054019  | 43_11821054019_323284w_ND7.fastq.gz  | A626V    | 99.913    | 1149.0         | 1285.1791221826800 | 6.67       | NPH         | 0.0       | 2     | 700    | 12NOV2020 10:25 | LY3819253 700mg IV           |
| 10891001   | 11835746954  | 25_11835746954_323284w_NC1.fastq.gz  | D614G    | 100.0     | 403.0          | 564.0547445255470  | 3.99       | NPH         | 0.0       | 2     | 700    | 05NOV2020 14:33 | Placebo for LY3819253 700 mg |
| 10991001   | 11854546760  | 53_11854546760_323284w_NE5.fastq.gz  | D614G    | 99.896    | 958.0          | 1184.1454767726200 | 5.07       | NPH         | 0.0       | 2     | 700    | 16NOV2020 11:26 | LY3819253 700mg IV           |
| 11061003   | 11852451904  | 14_11852451904_323284w_NB2.fastq.gz  | D614G    | 99.909    | 1100.0         | 1206.4608076009500 | 6.27       | NPH         | 0.0       | 2     | 700    | 04NOV2020 14:14 | Placebo for LY3819253 700 mg |
| 10261032   | 11846159684  | 40_11846159684_323284w_ND4.fastq.gz  | D614G    | 99.762    | 421.0          | 552.9378733572280  | 6.36       | NPH         | 0.0       | 2     | 700    | 12NOV2020 13:08 | Placebo for LY3819253 700 mg |
| 10441001   | 11821056066  | 36_11821056066_323284w_NC12.fastq.gz | T20I     | 99.966    | 2964.0         | 761.5012195121950  | 5.44       | NPH         | 0.0       | 2     | 700    | 10NOV2020 10:33 | Placebo for LY3819253 700 mg |
| 10441001   | 11821056066  | 36_11821056066_323284w_NC12.fastq.gz | D614G    | 100.0     | 493.0          | 761.5012195121950  | 5.44       | NPH         | 0.0       | 2     | 700    | 10NOV2020 10:33 | Placebo for LY3819253 700 mg |
| 10441001   | 11821056066  | 36_11821056066_323284w_NC12.fastq.gz | A626V    | 100.0     | 494.0          | 761.5012195121950  | 5.44       | NPH         | 0.0       | 2     | 700    | 10NOV2020 10:33 | Placebo for LY3819253 700 mg |
| 10151002   | 11800016393  | 64_11800016393_323284w_NF4.fastq.gz  | D614G    | 100.0     | 479.0          | 633.4498777506110  | 5.8        | NPH         | 0.0       | 2     | 700    | 15OCT2020 10:07 | Placebo for LY3819253 700 mg |
| 10261031   | 11846223687  | 42_11846223687_323284w_ND6.fastq.gz  | D614G    | 99.562    | 457.0          | 564.9750889679720  | 6.13       | NPH         | 0.0       | 2     | 700    | 12NOV2020 11:20 | Placebo for LY3819253 700 mg |
| 10331005   | 11839861568  | 74_11839861568_323284w_NG2.fastq.gz  | D614G    | 100.0     | 442.0          | 547.5935960591130  | 4.41       | NPH         | 0.0       | 2     | 700    | 23OCT2020 -2:-2 | LY3819253 700mg IV           |
| 10691001   | 11802168719  | 22_11802168719_323284w_NB10.fastq.gz | D614G    | 99.793    | 482.0          | 632.6760391198040  | 3.72       | NPH         | 0.0       | 2     | 700    | 05NOV2020 11:43 | Placebo for LY3819253 700 mg |
| 10371004   | 11833647113  | 5_11833647113_323284w_NA5.fastq.gz   | D614G    | 100.0     | 1072.0         | 1303.6312576312600 | 4.57       | NPH         | 0.0       | 2     | 700    | 02NOV2020 12:50 | Placebo for LY3819253 700 mg |
| 10311005   | 11839927049  | 78_11839927049_323284w_NG6.fastq.gz  | D614G    | 99.81     | 526.0          | 567.4087759815240  | 7.31       | NPH         | 0.0       | 2     | 700    | 22OCT2020 08:16 | Placebo for LY3819253 700 mg |
| 10311005   | 11839927049  | 78_11839927049_323284w_NG6.fastq.gz  | P681H    | 99.743    | 389.0          | 567.4087759815240  | 7.31       | NPH         | 0.0       | 2     | 700    | 22OCT2020 08:16 | Placebo for LY3819253 700 mg |
| 10371006   | 11833646080  | 16_11833646080_323284w_NB4.fastq.gz  | D614G    | 100.0     | 419.0          | 500.14932126696800 | 8.71       | NPH         | 0.0       | 2     | 700    | 04NOV2020 14:23 | Placebo for LY3819253 700 mg |
| 10491006   | 11816807245  | 34_11816807245_323284w_NC10.fastq.gz | A27S     | 99.939    | 1635.0         | 733.5615942028990  | 5.44       | NPH         | 0.0       | 2     | 700    | 10NOV2020 09:27 | LY3819253 700mg IV           |
| 10491006   | 11816807245  | 34_11816807245_323284w_NC10.fastq.gz | S247N    | 99.696    | 657.0          | 733.5615942028990  | 5.44       | NPH         | 0.0       | 2     | 700    | 10NOV2020 09:27 | LY3819253 700mg IV           |
| 10491006   | 11816807245  | 34_11816807245_323284w_NC10.fastq.gz | D614G    | 99.482    | 579.0          | 733.5615942028990  | 5.44       | NPH         | 0.0       | 2     | 700    | 10NOV2020 09:27 | LY3819253 700mg IV           |
| 10141004   | 11806310732  | 92_11806310732_323284w_NH8.fastq.gz  | D614G    | 100.0     | 509.0          | 682.7401477832510  | 3.84       | NPH         | 0.0       | 2     | 700    | 22OCT2020 14:43 | LY3819253 700mg IV           |
| 10291009   | 11833629515  | 45_11833629515_323284w_ND9.fastq.gz  | D614G    | 99.846    | 649.0          | 806.018472906404   | 4.9        | NPH         | 0.0       | 2     | 700    | 12NOV2020 11:44 | Placebo for LY3819253 700 mg |
| 10491004   | 11818969412  | 9_11818969412_323284w_NA9.fastq.gz   | D614G    | 99.817    | 546.0          | 601.8681710213780  | 5.97       | NPH         | 0.0       | 2     | 700    | 03NOV2020 10:16 | Placebo for LY3819253 700 mg |
| 10051005   | 11835721294  | 5_11835721294_323555w_BA5.fastq.gz   | D614G    | 99.913    | 1144.0         | 1500.981684981690  | 6.61       | NAS         | 0.0       | 2     | 700    | 28OCT2020 09:51 | LY3819253 700mg IV           |
| 10         |              |                                      |          |           |                |                    |            |             |           |       |        |                 |                              |

|          |             |                                       |         |        |        |                    |      |     |     |   |     |                 |                              |
|----------|-------------|---------------------------------------|---------|--------|--------|--------------------|------|-----|-----|---|-----|-----------------|------------------------------|
| 10081006 | 11804199691 | 59_11804199691_323163w_NE11.fastq.gz  | D614G   | 99.858 | 1407.0 | 1824.1525215252200 | 3.31 | OPW | 0.0 | 2 | 700 | 29OCT2020 11:57 | LY3819253 700mg IV           |
| 10221004 | 11839870213 | 41_11839870213_323163w_ND5.fastq.gz   | L5F     | 36.206 | 6557.0 | 2296.333740831300  | 3.13 | OPW | 0.0 | 2 | 700 | 16OCT2020 10:35 | Placebo for LY3819253 700 mg |
| 10221004 | 11839870213 | 41_11839870213_323163w_ND5.fastq.gz   | P82S    | 70.16  | 4008.0 | 2296.333740831300  | 3.13 | OPW | 0.0 | 2 | 700 | 16OCT2020 10:35 | Placebo for LY3819253 700 mg |
| 10221004 | 11839870213 | 41_11839870213_323163w_ND5.fastq.gz   | Y279H   | 32.252 | 2034.0 | 2296.333740831300  | 3.13 | OPW | 0.0 | 2 | 700 | 16OCT2020 10:35 | Placebo for LY3819253 700 mg |
| 10221004 | 11839870213 | 41_11839870213_323163w_ND5.fastq.gz   | Y279N   | 22.173 | 2034.0 | 2296.333740831300  | 3.13 | OPW | 0.0 | 2 | 700 | 16OCT2020 10:35 | Placebo for LY3819253 700 mg |
| 10221004 | 11839870213 | 41_11839870213_323163w_ND5.fastq.gz   | V367A   | 23.47  | 2190.0 | 2296.333740831300  | 3.13 | OPW | 0.0 | 2 | 700 | 16OCT2020 10:35 | Placebo for LY3819253 700 mg |
| 10221004 | 11839870213 | 41_11839870213_323163w_ND5.fastq.gz   | D614G   | 100.0  | 1773.0 | 2296.333740831300  | 3.13 | OPW | 0.0 | 2 | 700 | 16OCT2020 10:35 | Placebo for LY3819253 700 mg |
| 10221004 | 11839870213 | 41_11839870213_323163w_ND5.fastq.gz   | I720V   | 68.205 | 1192.0 | 2296.333740831300  | 3.13 | OPW | 0.0 | 2 | 700 | 16OCT2020 10:35 | Placebo for LY3819253 700 mg |
| 10031020 | 11800069697 | 53_11800069697_323163w_NE5.fastq.gz   | A27S    | 27.703 | 4328.0 | 1389.2246642246600 | 3.61 | OPW | 0.0 | 2 | 700 | 27OCT2020 09:49 | LY3819253 700mg IV           |
| 10031020 | 11800069697 | 53_11800069697_323163w_NE5.fastq.gz   | D614G   | 100.0  | 1320.0 | 1389.2246642246600 | 3.61 | OPW | 0.0 | 2 | 700 | 27OCT2020 09:49 | LY3819253 700mg IV           |
| 10031020 | 11800069697 | 53_11800069697_323163w_NE5.fastq.gz   | V772I   | 28.391 | 553.0  | 1389.2246642246600 | 3.61 | OPW | 0.0 | 2 | 700 | 27OCT2020 09:49 | LY3819253 700mg IV           |
| 10031020 | 11800069697 | 53_11800069697_323163w_NE5.fastq.gz   | S803L   | 26.546 | 663.0  | 1389.2246642246600 | 3.61 | OPW | 0.0 | 2 | 700 | 27OCT2020 09:49 | LY3819253 700mg IV           |
| 10051008 | 11835722573 | 87_11835722573_323163w_NH3.fastq.gz   | D614G   | 99.915 | 4707.0 | 6242.90973871734   | 4.14 | OPW | 0.0 | 2 | 700 | 06NOV2020 09:55 | Placebo for LY3819253 700 mg |
| 10051008 | 11835722573 | 87_11835722573_323163w_NH3.fastq.gz   | K814N   | 100.0  | 1.0    | 6242.90973871734   | 4.14 | OPW | 0.0 | 2 | 700 | 06NOV2020 09:55 | Placebo for LY3819253 700 mg |
| 10201008 | 11837838601 | 44_11837838601_323163w_ND8.fastq.gz   | D614G   | 100.0  | 1812.0 | 2598.613300492610  | 3.71 | OPW | 0.0 | 2 | 700 | 20OCT2020 09:45 | LY3819253 700mg IV           |
| 10031027 | 11808471111 | 93_11808471111_323163w_NH9.fastq.gz   | S459F   | 47.921 | 5507.0 | 5232.468137254900  | 4.65 | OPW | 0.0 | 2 | 700 | 13NOV2020 11:44 | Placebo for LY3819253 700 mg |
| 10031027 | 11808471111 | 93_11808471111_323163w_NH9.fastq.gz   | D614G   | 99.975 | 4018.0 | 5232.468137254900  | 4.65 | OPW | 0.0 | 2 | 700 | 13NOV2020 11:44 | Placebo for LY3819253 700 mg |
| 10041008 | 11802104837 | 90_11802104837_323163w_NH6.fastq.gz   | D614G   | 99.964 | 2766.0 | 4008.604422604420  | 4.23 | OPW | 0.0 | 2 | 700 | 15NOV2020 08:10 | Placebo for LY3819253 700 mg |
| 10201007 | 11816849739 | 43_11816849739_323163w_ND7.fastq.gz   | D614G   | 99.9   | 999.0  | 1358.5813953488400 | 5.18 | OPW | 0.0 | 2 | 700 | 15OCT2020 10:13 | LY3819253 700mg IV           |
| 10201007 | 11816849739 | 43_11816849739_323163w_ND7.fastq.gz   | P681R   | 99.763 | 844.0  | 1358.5813953488400 | 5.18 | OPW | 0.0 | 2 | 700 | 15OCT2020 10:13 | LY3819253 700mg IV           |
| 10031015 | 11802118087 | 82_11802118087_323163w_NG10.fastq.gz  | D614G   | 99.934 | 3041.0 | 4836.292682926830  | 4.25 | OPW | 0.0 | 2 | 700 | 20OCT2020 10:34 | LY3819253 700mg IV           |
| 10041004 | 11802104844 | 63_11802104844_323163w_NF3.fastq.gz   | D614G   | 100.0  | 2426.0 | 2987.6330049261100 | 3.27 | OPW | 0.0 | 2 | 700 | 30OCT2020 12:20 | LY3819253 700mg IV           |
| 10051004 | 11835657293 | 46_11835657293_323163w_ND10.fastq.gz  | D138H   | 96.626 | 3082.0 | 3590.2687116564400 | 5.03 | OPW | 0.0 | 2 | 700 | 20OCT2020 09:34 | LY3819253 700mg IV           |
| 10051004 | 11835657293 | 46_11835657293_323163w_ND10.fastq.gz  | G261A   | 21.9   | 3000.0 | 3590.2687116564400 | 5.03 | OPW | 0.0 | 2 | 700 | 20OCT2020 09:34 | LY3819253 700mg IV           |
| 10051004 | 11835657293 | 46_11835657293_323163w_ND10.fastq.gz  | D614G   | 99.964 | 2744.0 | 3590.2687116564400 | 5.03 | OPW | 0.0 | 2 | 700 | 20OCT2020 09:34 | LY3819253 700mg IV           |
| 10141003 | 11806308933 | 47_11806308933_323163w_ND11.fastq.gz  | D614G   | 100.0  | 1373.0 | 1854.7847478474800 | 3.82 | OPW | 0.0 | 2 | 700 | 20OCT2020 09:44 | LY3819253 700mg IV           |
| 10291006 | 11833631298 | B2_11833631298_324017w_AG2.fastq.gz   | D614G   | 99.902 | 2031.0 | 3285.1803680981600 | 3.52 | NPH | 0.0 | 2 | 700 | 06NOV2020 12:10 | LY3819253 700mg IV           |
| 10181009 | 11856630159 | C5_11856630159_324017w_AH5.fastq.gz   | D614G   | 99.952 | 2075.0 | 2904.5688185140100 | 4.85 | NPH | 0.0 | 2 | 700 | 06NOV2020 09:34 | LY3819253 700mg IV           |
| 10491002 | 11818969413 | A4_11818969413_324017w_AF4.fastq.gz   | Q23K    | 28.543 | 6450.0 | 1771.3090909090900 | 8.31 | NPH | 0.0 | 2 | 700 | 30OCT2020 10:20 | Placebo for LY3819253 700 mg |
| 10491002 | 11818969413 | A4_11818969413_324017w_AF4.fastq.gz   | D614G   | 99.897 | 967.0  | 1771.3090909090900 | 8.31 | NPH | 0.0 | 2 | 700 | 30OCT2020 10:20 | Placebo for LY3819253 700 mg |
| 10311012 | 11854531011 | B9_11854531011_324017w_AG9.fastq.gz   | D614G   | 99.947 | 3773.0 | 4168.017052375150  | 5.87 | NPH | 0.0 | 2 | 700 | 13NOV2020 08:31 | Placebo for LY3819253 700 mg |
| 10261026 | 11816806991 | B5_11816806991_323524w_BB5.fastq.gz   | D614G   | 100.0  | 779.0  | 1155.7737226277400 | 4.67 | NPH | 0.0 | 2 | 700 | 26OCT2020 14:39 | LY3819253 700mg IV           |
| 10201011 | 11818966799 | A7_11818966799_323524w_BA7.fastq.gz   | D614G   | 100.0  | 1166.0 | 1180.4024122807000 | 8.23 | NPH | 0.0 | 2 | 700 | 27OCT2020 09:28 | Placebo for LY3819253 700 mg |
| 10131011 | 11812671562 | C11_11812671562_323524w_BC11.fastq.gz | D614G   | 100.0  | 187.0  | 1016.6992840095500 | 5.71 | NPH | 0.0 | 2 | 700 | 10NOV2020 10:57 | Placebo for LY3819253 700 mg |
| 10131011 | 11812671562 | C11_11812671562_323524w_BC11.fastq.gz | K814N   | 100.0  | 1.0    | 1016.6992840095500 | 5.71 | NPH | 0.0 | 2 | 700 | 10NOV2020 10:57 | Placebo for LY3819253 700 mg |
| 10421018 | 11852447885 | G5_11852447885_323524w_BG5.fastq.gz   | D614G   | 99.902 | 1016.0 | 1305.6560975609800 | 6.96 | NPH | 0.0 | 2 | 700 | 16NOV2020 09:33 | LY3819253 700mg IV           |
| 10421017 | 11852446087 | G1_11852446087_323524w_BG1.fastq.gz   | F140del | 34.79  | 618.0  | 1051.0619684082600 | 3.88 | NPH | 0.0 | 2 | 700 | 10NOV2020 09:32 | LY3819253 700mg IV           |
| 10421017 | 11852446087 | G1_11852446087_323524w_BG1.fastq.gz   | L141del | 35.131 | 612.0  | 1051.0619684082600 | 3.88 | NPH | 0.0 | 2 | 700 | 10NOV2020 09:32 | LY3819253 700mg IV           |
| 10421017 | 11852446087 | G1_11852446087_323524w_BG1.fastq.gz   | G142del | 36.627 | 587.0  | 1051.0619684082600 | 3.88 | NPH | 0.0 | 2 | 700 | 10NOV2020 09:32 | LY3819253 700mg IV           |
| 10421017 | 11852446087 | G1_11852446087_323524w_BG1.fastq.gz   | D614G   | 100.0  | 842.0  | 1051.0619684082600 | 3.88 | NPH | 0.0 | 2 | 700 | 10NOV2020 09:32 | LY3819253 700mg IV           |
| 10421017 | 11852446087 | G1_11852446087_323524w_BG1.fastq.gz   | K814T   | 50.0   | 2.0    | 1051.0619684082600 | 3.88 | NPH | 0.0 | 2 | 700 | 10NOV2020 09:32 | LY3819253 700mg IV           |
| 10261030 | 11850354574 | E7_11850354574_323524w_BE7.fastq.gz   | S161A   | 99.897 | 967.0  | 1097.8092345079000 | 8.37 | NPH | 0.0 | 2 | 700 | 04NOV2020 16:36 | LY3819253 700mg IV           |
| 10261030 | 11850354574 | E7_11850354574_323524w_BE7.fastq.gz   | D614G   | 100.0  | 755.0  | 1097.8092345079000 | 8.37 | NPH | 0.0 | 2 | 700 | 04NOV2020 16:36 | LY3819253 700mg IV           |
| 10261030 | 11850354574 | E7_11850354574_323524w_BE7.fastq.gz   | I805M   | 99.898 | 2952.0 | 1097.8092345079000 | 8.37 | NPH | 0.0 | 2 | 700 | 04NOV2020 16:36 | LY3819253 700mg IV           |
| 10081010 | 11821060040 | C7_11821060040_323524w_BC7.fastq.gz   | D614G   | 100.0  | 760.0  | 1120.8168498168500 | 6.0  | NPH | 0.0 | 2 | 700 | 14NOV2020 10:46 | LY3819253 700mg IV           |
| 10131010 | 11846155275 | D3_11846155275_323524w_BD3.fastq.gz   | D111N   | 100.0  | 954.0  | 1103.1711491442500 | 7.24 | NAS | 0.0 | 2 | 700 | 10NOV2020 08:59 | Placebo for LY3819253 700 mg |
| 10131010 | 11846155275 | D3_11846155275_323524w_BD3.fastq.gz   | D614G   | 100.0  | 898.0  | 1103.1711491442500 | 7.24 | NAS | 0.0 | 2 | 700 | 10NOV2020 08:59 | Placebo for LY3819253 700 mg |
| 10131010 | 11846155275 | D3_11846155275_323524w_BD3.fastq.gz   | T732A   | 99.83  | 587.0  | 1103.1711491442500 | 7.24 | NAS | 0.0 | 2 | 700 | 10NOV2020 08:59 | Placebo for LY3819253 700 mg |
| 10181008 | 11802116997 | A9_11802116997_323524w_BA9.fastq.gz   | A27S    | 99.625 | 4004.0 | 1503.2570379437000 | 3.94 | NPH | 0.0 | 2 | 700 | 15OCT2020 08:37 | LY3819253 700mg IV           |
| 10181008 | 11802116997 | A9_11802116997_323524w_BA9.fastq.gz   | F140del | 79.452 | 438.0  | 1503.2570379437000 | 3.94 | NPH | 0.0 | 2 | 700 | 15OCT2020 08:37 | LY3819253 700mg IV           |
| 10181008 | 11802116997 | A9_11802116997_323524w_BA9.fastq.gz   | L141del | 46.325 | 721.0  | 1503.2570379437000 | 3.94 | NPH | 0.0 | 2 | 700 | 15OCT2020 08:37 | LY3819253 700mg IV           |
| 10181008 | 11802116997 | A9_11802116997_323524w_BA9.fastq.gz   | G142del | 47.81  | 799.0  | 1503.2570379437000 | 3.94 | NPH | 0.0 | 2 | 700 | 15OCT2020 08:37 | LY3819253 700mg IV           |
| 10181008 | 11802116997 | A9_11802116997_323524w_BA9.fastq.gz   | V143del | 45.573 | 768.0  | 1503.2570379437000 | 3.94 | NPH | 0.0 | 2 | 700 | 15OCT2020 08:37 | LY3819253 700mg IV           |
| 10181008 | 11802116997 | A9_11802116997_323524w_BA9.fastq.gz   | D614G   | 100.0  | 1154.0 | 1503.2570379437000 | 3.94 | NPH | 0.0 | 2 | 700 | 15OCT2020 08:37 | LY3819253 700mg IV           |
| 10511007 | 11800094220 | A8_11800094220_323524w_BA8.fastq.gz   | D138H   | 99.874 | 1589.0 | 1540.083028083030  | 4.66 | NPH | 0.0 | 2 | 700 | 19OCT2020 11:06 | LY3819253 700mg IV           |
| 10511007 | 11800094220 | A8_11800094220_323524w_BA8.fastq.gz   | D614G   | 100.0  | 296.0  | 1540.083028083030  | 4.66 | NPH | 0.0 | 2 | 700 | 19OCT2020 11:06 | LY3819253 700mg IV           |
| 10031027 | 11812671561 | H10_11812671561_323524w_BH10.fastq.gz | D614G   | 99.895 | 949.0  | 1298.5243309002400 | 7.43 | NPH | 0.0 | 2 | 700 | 13NOV2020 11:43 | Placebo for LY3819253 700 mg |
| 10411001 | 11835726663 | H3_11835726663_323524w_BH3.fastq.gz   | F32L    | 99.856 | 2088.0 | 1089.3137973138000 | 6.25 | NPH | 0.0 | 2 | 700 | 06NOV2020 09:56 | Placebo for LY3819253 700 mg |
| 10411001 | 11835726663 | H3_11835726663_323524w_BH3.fastq.gz   | P251S   | 100.0  | 1036.0 | 1089.3137973138000 | 6.25 | NPH | 0.0 | 2 | 700 | 06NOV2020 09:56 | Placebo for LY3819253 700 mg |
| 10411001 | 11835726663 | H3_11835726663_323524w_BH3.fastq.gz   | D614G   | 100.0  | 924.0  | 1089.3137973138000 | 6.25 | NPH | 0.0 | 2 | 700 | 06NOV2020 09:56 | Placebo for LY3819253 700 mg |
| 10311014 | 11814769350 | 63_11814769350_323232w_AF3.fastq.gz   | D614G   | 99.857 | 3494.0 | 3801.6705069124400 | 6.6  | NPH | 0.0 | 2 | 700 | 18NOV2020 08:26 | Placebo for LY3819253 700 mg |
| 10311014 | 11814769350 | 63_11814769350_323232w_AF3.fastq.gz   | L841F   | 25.0   | 4.0    | 3801.6705069124400 | 6.6  | NPH | 0.0 | 2 | 700 | 18NOV2020 08:26 | Placebo for LY3819253 700 mg |
| 10311013 | 11854531016 | 64_11854531016_323232w_AF4.fastq.gz   | D614G   | 99.935 | 1541.0 | 1837.9618226601000 | 3.46 | NPH | 0.0 | 2 | 700 | 16NOV2020 09:46 | Placebo for LY3819253 700 mg |
| 10411001 | 11835726661 | 39_11835726661_323232w_AD3.fastq.gz   | F32L    | 99.886 | 8744.0 | 4160.020214030920  | 5.16 | NAS |     |   |     |                 |                              |

|          |             |                                     |         |        |         |                    |      |     |     |   |     |                 |                              |
|----------|-------------|-------------------------------------|---------|--------|---------|--------------------|------|-----|-----|---|-----|-----------------|------------------------------|
| 10411004 | 11835726919 | 53_11835726919_323232w_AE5.fastq.gz | F32L    | 99.878 | 4925.0  | 2188.820877817320  | 6.07 | NPH | 0.0 | 2 | 700 | 16NOV2020 09:43 | LY3819253 700mg IV           |
| 10411004 | 11835726919 | 53_11835726919_323232w_AE5.fastq.gz | P251S   | 99.737 | 2281.0  | 2188.820877817320  | 6.07 | NPH | 0.0 | 2 | 700 | 16NOV2020 09:43 | LY3819253 700mg IV           |
| 10411004 | 11835726919 | 53_11835726919_323232w_AE5.fastq.gz | D614G   | 99.642 | 1958.0  | 2188.820877817320  | 6.07 | NPH | 0.0 | 2 | 700 | 16NOV2020 09:43 | LY3819253 700mg IV           |
| 10411004 | 11835726919 | 53_11835726919_323232w_AE5.fastq.gz | A831V   | 33.333 | 3.0     | 2188.820877817320  | 6.07 | NPH | 0.0 | 2 | 700 | 16NOV2020 09:43 | LY3819253 700mg IV           |
| 10411004 | 11835726919 | 53_11835726919_323232w_AE5.fastq.gz | Y837D   | 50.0   | 2.0     | 2188.820877817320  | 6.07 | NPH | 0.0 | 2 | 700 | 16NOV2020 09:43 | LY3819253 700mg IV           |
| 10561005 | 11839942466 | 43_11839942466_323232w_AD7.fastq.gz | D614G   | 99.883 | 1709.0  | 1861.7516853932600 | 7.91 | NPH | 0.0 | 2 | 700 | 27OCT2020 11:55 | Placebo for LY3819253 700 mg |
| 10421015 | 11821000197 | 6_11821000197_323232w_AA6.fastq.gz  | D614G   | 99.895 | 3821.0  | 3839.3602150537600 | 7.67 | NPH | 0.0 | 2 | 700 | 04NOV2020 09:33 | Placebo for LY3819253 700 mg |
| 10031025 | 11846219522 | 52_11846219522_323232w_AE4.fastq.gz | D614G   | 99.787 | 3757.0  | 4285.228944246740  | 4.94 | NAS | 0.0 | 2 | 700 | 10NOV2020 12:42 | LY3819253 700mg IV           |
| 10031026 | 11812671296 | 67_11812671296_323232w_AF7.fastq.gz | R21I    | 99.82  | 10000.0 | 5065.161369193150  | 6.0  | NPH | 0.0 | 2 | 700 | 12NOV2020 09:58 | LY3819253 700mg IV           |
| 10031026 | 11812671296 | 67_11812671296_323232w_AF7.fastq.gz | D614G   | 99.877 | 4064.0  | 5065.161369193150  | 6.0  | NPH | 0.0 | 2 | 700 | 12NOV2020 09:58 | LY3819253 700mg IV           |
| 10421009 | 11818878212 | 21_11818878212_323232w_AB9.fastq.gz | D614G   | 99.909 | 3285.0  | 3865.628266033250  | 6.71 | NPH | 0.0 | 2 | 700 | 22OCT2020 09:34 | Placebo for LY3819253 700 mg |
| 10051002 | 11835721540 | B4_21540_322773w_NB4.fastq.gz       | D614G   | 99.761 | 3343.0  | 4184.483731019520  | 6.4  | NPH | 0.0 | 2 | 700 | 19OCT2020 12:05 | Placebo for LY3819253 700 mg |
| 10051003 | 11835721807 | B3_21807_322773w_NB3.fastq.gz       | N394D   | 100.0  | 1.0     | 4293.772727272730  | 8.3  | NPH | 0.0 | 2 | 700 | 20OCT2020 09:51 | LY3819253 700mg IV           |
| 10051003 | 11835721807 | B3_21807_322773w_NB3.fastq.gz       | D614G   | 99.866 | 4464.0  | 4293.772727272730  | 8.3  | NPH | 0.0 | 2 | 700 | 20OCT2020 09:51 | LY3819253 700mg IV           |
| 10241003 | 11837830208 | E5_30208_322773w_NE5.fastq.gz       | Y421D   | 99.838 | 6174.0  | 1940.7512077294700 | 2.15 | NPH | 0.0 | 2 | 700 | 16OCT2020 09:42 | Placebo for LY3819253 700 mg |
| 10241003 | 11837830208 | E5_30208_322773w_NE5.fastq.gz       | D614G   | 100.0  | 792.0   | 1940.7512077294700 | 2.15 | NPH | 0.0 | 2 | 700 | 16OCT2020 09:42 | Placebo for LY3819253 700 mg |
| 10081003 | 11837820421 | A9_20421_322773w_NA9.fastq.gz       | D614G   | 99.924 | 3955.0  | 4613.3938053097300 | 7.64 | NPH | 0.0 | 2 | 700 | 12OCT2020 12:01 | Placebo for LY3819253 700 mg |
| 10251006 | 11850336526 | E4_36526_322773w_NE4.fastq.gz       | D614G   | 99.752 | 4034.0  | 4615.490022172950  | 7.2  | NPH | 0.0 | 2 | 700 | 15OCT2020 09:48 | Placebo for LY3819253 700 mg |
| 10251006 | 11850336526 | E4_36526_322773w_NE4.fastq.gz       | G832D   | 23.529 | 17.0    | 4615.490022172950  | 7.2  | NPH | 0.0 | 2 | 700 | 15OCT2020 09:48 | Placebo for LY3819253 700 mg |
| 10411002 | 11835728709 | H7_11835728709_323513w_NH7.fastq.gz | F32L    | 99.92  | 5010.0  | 1772.0426309378800 | 4.12 | NPH | 0.0 | 2 | 700 | 10NOV2020 09:46 | LY3819253 700mg IV           |
| 10411002 | 11835728709 | H7_11835728709_323513w_NH7.fastq.gz | P251S   | 99.94  | 1658.0  | 1772.0426309378800 | 4.12 | NPH | 0.0 | 2 | 700 | 10NOV2020 09:46 | LY3819253 700mg IV           |
| 10411002 | 11835728709 | H7_11835728709_323513w_NH7.fastq.gz | D614G   | 99.797 | 1476.0  | 1772.0426309378800 | 4.12 | NPH | 0.0 | 2 | 700 | 10NOV2020 09:46 | LY3819253 700mg IV           |
| 10051005 | 11835721293 | 45_21293_322851w_CD9.fastq.gz       | D614G   | 99.776 | 892.0   | 1305.1413911060400 | 7.97 | NPH | 0.0 | 2 | 700 | 28OCT2020 09:51 | LY3819253 700mg IV           |
| 10011015 | 11816786496 | 14_86496_322851w_CB2.fastq.gz       | D614G   | 100.0  | 874.0   | 1133.7052375152300 | 4.73 | NAS | 0.0 | 2 | 700 | 27OCT2020 09:12 | LY3819253 700mg IV           |
| 10061004 | 11804260942 | 38_60942_322851w_CD2.fastq.gz       | D614G   | 99.716 | 1056.0  | 1295.7097156398100 | 6.68 | NPH | 0.0 | 2 | 700 | 28OCT2020 14:45 | LY3819253 700mg IV           |
| 10031018 | 11802184335 | 18_84335_322851w_CB6.fastq.gz       | D614G   | 99.85  | 1331.0  | 1428.1515499425900 | 7.43 | NPH | 0.0 | 2 | 700 | 23OCT2020 09:40 | Placebo for LY3819253 700 mg |
| 10031018 | 11802184335 | 18_84335_322851w_CB6.fastq.gz       | A846S   | 50.0   | 2.0     | 1428.1515499425900 | 7.43 | NPH | 0.0 | 2 | 700 | 23OCT2020 09:40 | Placebo for LY3819253 700 mg |
| 10111002 | 11837817153 | 43_17153_322851w_CD7.fastq.gz       | D614G   | 99.921 | 1263.0  | 1549.089179548160  | 5.49 | NPH | 0.0 | 2 | 700 | 02NOV2020 09:53 | LY3819253 700mg IV           |
| 10011013 | 11816788040 | 3_88040_322851w_CA3.fastq.gz        | W152L   | 99.747 | 1581.0  | 1519.9036860879900 | 6.31 | NPH | 0.0 | 2 | 700 | 16OCT2020 10:31 | Placebo for LY3819253 700 mg |
| 10011013 | 11816788040 | 3_88040_322851w_CA3.fastq.gz        | V289I   | 99.878 | 1638.0  | 1519.9036860879900 | 6.31 | NPH | 0.0 | 2 | 700 | 16OCT2020 10:31 | Placebo for LY3819253 700 mg |
| 10011013 | 11816788040 | 3_88040_322851w_CA3.fastq.gz        | D614G   | 99.922 | 1274.0  | 1519.9036860879900 | 6.31 | NPH | 0.0 | 2 | 700 | 16OCT2020 10:31 | Placebo for LY3819253 700 mg |
| 10031020 | 11800069698 | 21_69698_322851w_CB9.fastq.gz       | A27S    | 99.764 | 3821.0  | 1489.5170789163700 | 7.13 | NPH | 0.0 | 2 | 700 | 27OCT2020 09:46 | LY3819253 700mg IV           |
| 10031020 | 11800069698 | 21_69698_322851w_CB9.fastq.gz       | D614G   | 99.841 | 1256.0  | 1489.5170789163700 | 7.13 | NPH | 0.0 | 2 | 700 | 27OCT2020 09:46 | LY3819253 700mg IV           |
| 10031016 | 11802186383 | 16_86383_322851w_CB4.fastq.gz       | D614G   | 99.566 | 1153.0  | 1404.0551470588200 | 2.89 | NPH | 0.0 | 2 | 700 | 21OCT2020 10:20 | Placebo for LY3819253 700 mg |
| 10061005 | 11804194886 | 40_94886_322851w_CD4.fastq.gz       | D614G   | 100.0  | 1108.0  | 1359.7919143876300 | 5.42 | NPH | 0.0 | 2 | 700 | 29OCT2020 13:02 | LY3819253 700mg IV           |
| 10021006 | 11833557313 | 47_57313_322851w_CD11.fastq.gz      | D614G   | 99.92  | 1254.0  | 1531.5574572127100 | 4.91 | NPH | 0.0 | 2 | 700 | 29OCT2020 08:59 | Placebo for LY3819253 700 mg |
| 10031015 | 11802184581 | 17_84581_322851w_CB5.fastq.gz       | D614G   | 100.0  | 995.0   | 1197.663990825690  | 8.45 | NPH | 0.0 | 2 | 700 | 20OCT2020 10:33 | LY3819253 700mg IV           |
| 10091003 | 11802103554 | 34_03554_322851w_CC10.fastq.gz      | S98F    | 99.718 | 1770.0  | 1706.0745562130200 | 6.02 | NPH | 0.0 | 2 | 700 | 30OCT2020 10:45 | Placebo for LY3819253 700 mg |
| 10091003 | 11802103554 | 34_03554_322851w_CC10.fastq.gz      | K182R   | 100.0  | 1611.0  | 1706.0745562130200 | 6.02 | NPH | 0.0 | 2 | 700 | 30OCT2020 10:45 | Placebo for LY3819253 700 mg |
| 10091003 | 11802103554 | 34_03554_322851w_CC10.fastq.gz      | D614G   | 99.645 | 1408.0  | 1706.0745562130200 | 6.02 | NPH | 0.0 | 2 | 700 | 30OCT2020 10:45 | Placebo for LY3819253 700 mg |
| 10091003 | 11802103554 | 34_03554_322851w_CC10.fastq.gz      | E819del | 50.0   | 2.0     | 1706.0745562130200 | 6.02 | NPH | 0.0 | 2 | 700 | 30OCT2020 10:45 | Placebo for LY3819253 700 mg |
| 10091003 | 11802103554 | 34_03554_322851w_CC10.fastq.gz      | L822del | 100.0  | 1.0     | 1706.0745562130200 | 6.02 | NPH | 0.0 | 2 | 700 | 30OCT2020 10:45 | Placebo for LY3819253 700 mg |
| 10081005 | 11804200458 | 31_00458_322851w_CC7.fastq.gz       | D614G   | 99.614 | 1297.0  | 1794.1919315403400 | 5.4  | NPH | 0.0 | 2 | 700 | 22OCT2020 09:19 | LY3819253 700mg IV           |
| 10081004 | 11804198656 | 29_98656_322851w_CC5.fastq.gz       | D614G   | 99.912 | 1142.0  | 1371.7488151658800 | 6.36 | NPH | 0.0 | 2 | 700 | 19OCT2020 08:07 | LY3819253 700mg IV           |
| 10081004 | 11804198656 | 29_98656_322851w_CC5.fastq.gz       | N824Y   | 33.333 | 3.0     | 1371.7488151658800 | 6.36 | NPH | 0.0 | 2 | 700 | 19OCT2020 08:07 | LY3819253 700mg IV           |
| 10051006 | 11835723342 | 44_23342_322851w_CD8.fastq.gz       | D614G   | 99.753 | 1215.0  | 1374.0719656283600 | 7.0  | NPH | 0.0 | 2 | 700 | 28OCT2020 09:40 | LY3819253 700mg IV           |
| 10031017 | 11802186381 | 25_86381_322851w_CC11.fastq.gz      | D614G   | 99.898 | 984.0   | 1135.3478260869600 | 5.4  | NPH | 0.0 | 2 | 700 | 22OCT2020 10:42 | Placebo for LY3819253 700 mg |
| 10031017 | 11802186381 | 25_86381_322851w_CC11.fastq.gz      | T732A   | 97.076 | 684.0   | 1135.3478260869600 | 5.4  | NPH | 0.0 | 2 | 700 | 22OCT2020 10:42 | Placebo for LY3819253 700 mg |
| 10031017 | 11802186381 | 25_86381_322851w_CC11.fastq.gz      | E819del | 33.333 | 3.0     | 1135.3478260869600 | 5.4  | NPH | 0.0 | 2 | 700 | 22OCT2020 10:42 | Placebo for LY3819253 700 mg |
| 10031017 | 11802186381 | 25_86381_322851w_CC11.fastq.gz      | L822del | 50.0   | 2.0     | 1135.3478260869600 | 5.4  | NPH | 0.0 | 2 | 700 | 22OCT2020 10:42 | Placebo for LY3819253 700 mg |
| 10031019 | 11802184580 | 20_84580_322851w_CB8.fastq.gz       | D614G   | 99.596 | 990.0   | 1415.8024390243900 | 4.84 | NPH | 0.0 | 2 | 700 | 26OCT2020 09:59 | Placebo for LY3819253 700 mg |
| 10031019 | 11802184580 | 20_84580_322851w_CB8.fastq.gz       | T732A   | 80.569 | 633.0   | 1415.8024390243900 | 4.84 | NPH | 0.0 | 2 | 700 | 26OCT2020 09:59 | Placebo for LY3819253 700 mg |
| 10041005 | 11802104079 | 5_04079_322847w_BA5.fastq.gz        | D614G   | 99.945 | 1802.0  | 2004.1781946072700 | 6.73 | NPH | 0.0 | 2 | 700 | 30OCT2020 11:00 | Placebo for LY3819253 700 mg |
| 10041005 | 11802104079 | 5_04079_322847w_BA5.fastq.gz        | E819del | 20.833 | 24.0    | 2004.1781946072700 | 6.73 | NPH | 0.0 | 2 | 700 | 30OCT2020 11:00 | Placebo for LY3819253 700 mg |
| 10061009 | 11804198212 | 34_98212_322847w_BC10.fastq.gz      | D614G   | 99.632 | 1903.0  | 2439.5053507728900 | 5.99 | NPH | 0.0 | 2 | 700 | 11NOV2020 08:50 | Placebo for LY3819253 700 mg |
| 10011018 | 11818884431 | 74_84431_322847w_BG2.fastq.gz       | D614G   | 99.762 | 1260.0  | 1474.5658056580600 | 3.95 | NPH | 0.0 | 2 | 700 | 04NOV2020 10:18 | Placebo for LY3819253 700 mg |
| 10041006 | 11802101766 | 38_01766_322847w_BD2.fastq.gz       | D614G   | 99.927 | 1369.0  | 1518.485172004750  | 6.41 | NPH | 0.0 | 2 | 700 | 12NOV2020 10:20 | LY3819253 700mg IV           |
| 10021008 | 11833623555 | 47_23555_322847w_BD11.fastq.gz      | D138Y   | 99.896 | 1917.0  | 2003.845444059980  | 7.27 | NPH | 0.0 | 2 | 700 | 12NOV2020 09:23 | LY3819253 700mg IV           |
| 10021008 | 11833623555 | 47_23555_322847w_BD11.fastq.gz      | D614G   | 99.816 | 1629.0  | 2003.845444059980  | 7.27 | NPH | 0.0 | 2 | 700 | 12NOV2020 09:23 | LY3819253 700mg IV           |
| 10011022 | 11816795211 | 20_95211_322847w_BB8.fastq.gz       | D614G   | 99.789 | 1896.0  | 2152.1597633136100 | 6.02 | NPH | 0.0 | 2 | 700 | 10NOV2020 09:37 | Placebo for LY3819253 700 mg |
| 10011022 | 11816795211 | 20_95211_322847w_BB8.fastq.gz       | E819del | 25.0   | 4.0     | 2152.1597633136100 | 6.02 | NPH | 0.0 | 2 | 700 | 10NOV2020 09:37 | Placebo for LY3819253 700 mg |
| 10011022 | 11816795211 | 20_95211_322847w_BB8.fastq.gz       | D820del | 50.0   | 2.0     | 2152.1597633136100 | 6.02 | NPH | 0.0 | 2 | 700 | 10NOV2020 09:37 | Placebo for LY3819253 700 mg |
| 10011022 | 11816795211 | 20_95211_322847w_BB8.fastq.gz       | L821del | 50.0   | 2.0     | 2152.1597633136100 | 6.02 | NPH | 0.0 | 2 | 700 | 10NOV2020 09:37 | Placebo for LY3819253 700 mg |
| 10031022 | 11816807239 | 16_07239_322847w_BB4.fastq.gz       | D614G   | 99.636 | 1375.0  | 1545.8681672025700 | 7.96 | NPH | 0.0 | 2 | 700 | 04NOV2020 11:48 | Placebo for LY3819253 700 mg |
| 10031022 | 11816807239 | 16_07239_322847w_BB4.fastq.gz       | Q675H   | 100.0  | 1066.0  | 1545.8681672025700 | 7.96 | NPH | 0.0 | 2 | 700 | 04NOV2020 11:48 | Placebo for LY3819253 700 mg |
| 10011017 | 11818948164 | 75_48164_322847w_BG3.fastq.gz       | D614G   | 99.85  |         |                    |      |     |     |   |     |                 |                              |

|          |             |                                       |         |        |        |                    |      |     |     |   |     |                 |                              |
|----------|-------------|---------------------------------------|---------|--------|--------|--------------------|------|-----|-----|---|-----|-----------------|------------------------------|
| 10011021 | 11816795209 | 18_95209_322847w_BB6.fastq.gz         | D614G   | 99.398 | 1661.0 | 2090.345498783460  | 4.38 | NPH | 0.0 | 2 | 700 | 09NOV2020 09:33 | Placebo for LY3819253 700 mg |
| 10011021 | 11816795209 | 18_95209_322847w_BB6.fastq.gz         | K814N   | 50.0   | 2.0    | 2090.345498783460  | 4.38 | NPH | 0.0 | 2 | 700 | 09NOV2020 09:33 | Placebo for LY3819253 700 mg |
| 10051009 | 11835724613 | 42_24613_322847w_BD6.fastq.gz         | D614G   | 99.753 | 1618.0 | 1819.2590431738600 | 7.6  | NPH | 0.0 | 2 | 700 | 13NOV2020 11:38 | LY3819253 700mg IV           |
| 10081007 | 11804200448 | 27_00448_322847w_BC3.fastq.gz         | S98F    | 99.949 | 1964.0 | 1885.5244498777500 | 5.16 | NPH | 0.0 | 2 | 700 | 10NOV2020 10:08 | Placebo for LY3819253 700 mg |
| 10081007 | 11804200448 | 27_00448_322847w_BC3.fastq.gz         | D614G   | 99.935 | 1545.0 | 1885.5244498777500 | 5.16 | NPH | 0.0 | 2 | 700 | 10NOV2020 10:08 | Placebo for LY3819253 700 mg |
| 10081006 | 11804199689 | 26_99689_322847w_BC2.fastq.gz         | A520S   | 100.0  | 1582.0 | 1512.2342342342300 | 7.98 | NPH | 0.0 | 2 | 700 | 29OCT2020 11:57 | LY3819253 700mg IV           |
| 10081006 | 11804199689 | 26_99689_322847w_BC2.fastq.gz         | D614G   | 100.0  | 1424.0 | 1512.2342342342300 | 7.98 | NPH | 0.0 | 2 | 700 | 29OCT2020 11:57 | LY3819253 700mg IV           |
| 10061007 | 11804197709 | 32_97709_322847w_BC8.fastq.gz         | D614G   | 99.902 | 2033.0 | 2154.493227990970  | 6.73 | NPH | 0.0 | 2 | 700 | 09NOV2020 10:56 | Placebo for LY3819253 700 mg |
| 10061008 | 11804195150 | 33_95150_322847w_BC9.fastq.gz         | D614G   | 99.82  | 2784.0 | 3097.2673733804500 | 6.17 | NPH | 0.0 | 2 | 700 | 10NOV2020 10:35 | LY3819253 700mg IV           |
| 10061008 | 11804195150 | 33_95150_322847w_BC9.fastq.gz         | E819del | 25.0   | 8.0    | 3097.2673733804500 | 6.17 | NPH | 0.0 | 2 | 700 | 10NOV2020 10:35 | LY3819253 700mg IV           |
| 10061008 | 11804195150 | 33_95150_322847w_BC9.fastq.gz         | L822del | 33.333 | 6.0    | 3097.2673733804500 | 6.17 | NPH | 0.0 | 2 | 700 | 10NOV2020 10:35 | LY3819253 700mg IV           |
| 10011025 | 11816795210 | 17_95210_322847w_BB5.fastq.gz         | D614G   | 99.738 | 1906.0 | 2288.811965811970  | 5.71 | NPH | 0.0 | 2 | 700 | 16NOV2020 08:51 | Placebo for LY3819253 700 mg |
| 10051008 | 11835722574 | 79_22574_322847w_BG7.fastq.gz         | F43T    | 28.159 | 4471.0 | 1477.7827956989200 | 7.87 | NPH | 0.0 | 2 | 700 | 06NOV2020 09:55 | Placebo for LY3819253 700 mg |
| 10051008 | 11835722574 | 79_22574_322847w_BG7.fastq.gz         | D614G   | 99.719 | 1425.0 | 1477.7827956989200 | 7.87 | NPH | 0.0 | 2 | 700 | 06NOV2020 09:55 | Placebo for LY3819253 700 mg |
| 10041003 | 11802104332 | 4_04332_322847w_BA4.fastq.gz          | D614G   | 99.892 | 1853.0 | 2056.458432304040  | 7.62 | NPH | 0.0 | 2 | 700 | 28OCT2020 12:30 | LY3819253 700mg IV           |
| 10121010 | 11804197441 | 1_11804197441_323283w_CC12.fastq.gz   | D614G   | 99.721 | 1074.0 | 1315.1245551601400 | 6.36 | NPH | 0.0 | 2 | 700 | 09NOV2020 08:40 | Placebo for LY3819253 700 mg |
| 10161006 | 11818954316 | 5_11818954316_323283w_CD4.fastq.gz    | D614G   | 100.0  | 1023.0 | 1269.7167277167300 | 3.52 | NPH | 0.0 | 2 | 700 | 06NOV2020 11:08 | LY3819253 700mg IV           |
| 10111002 | 11837817155 | F2_11837817155_324019w_CF2.fastq.gz   | D614G   | 99.879 | 2475.0 | 2073.658506731950  | 4.13 | OPW | 0.0 | 2 | 700 | 02NOV2020 09:53 | LY3819253 700mg IV           |
| 10121005 | 11804195144 | E6_11804195144_324019w_CE6.fastq.gz   | D614G   | 99.789 | 1424.0 | 2315.101466992670  | 4.34 | OPW | 0.0 | 2 | 700 | 21OCT2020 11:09 | Placebo for LY3819253 700 mg |
| 10121005 | 11804195144 | E6_11804195144_324019w_CE6.fastq.gz   | K814N   | 100.0  | 1.0    | 2315.101466992670  | 4.34 | OPW | 0.0 | 2 | 700 | 21OCT2020 11:09 | Placebo for LY3819253 700 mg |
| 10011015 | 11816851018 | F1_11816851018_324019w_CF1.fastq.gz   | D614G   | 99.92  | 1251.0 | 1731.6479902557900 | 3.91 | OPW | 0.0 | 2 | 700 | 27OCT2020 09:15 | LY3819253 700mg IV           |
| 10141005 | 11806307910 | F9_11806307910_324019w_CF9.fastq.gz   | D614G   | 99.807 | 3116.0 | 2352.0308422301300 | 3.1  | OPW | 0.0 | 2 | 700 | 05NOV2020 11:18 | Placebo for LY3819253 700 mg |
| 10141005 | 11806307910 | F9_11806307910_324019w_CF9.fastq.gz   | K814N   | 33.333 | 3.0    | 2352.0308422301300 | 3.1  | OPW | 0.0 | 2 | 700 | 05NOV2020 11:18 | Placebo for LY3819253 700 mg |
| 10241005 | 11837828171 | F10_11837828171_324019w_CF10.fastq.gz | D614G   | 99.885 | 1740.0 | 3256.8688725490200 | 3.17 | OPW | 0.0 | 2 | 700 | 12NOV2020 08:54 | Placebo for LY3819253 700 mg |
| 10241005 | 11837828171 | F10_11837828171_324019w_CF10.fastq.gz | K814N   | 50.0   | 2.0    | 3256.8688725490200 | 3.17 | OPW | 0.0 | 2 | 700 | 12NOV2020 08:54 | Placebo for LY3819253 700 mg |
| 10161005 | 11818952782 | F3_11818952782_324019w_CF3.fastq.gz   | D614G   | 99.879 | 3314.0 | 2324.004750593820  | 3.64 | OPW | 0.0 | 2 | 700 | 30OCT2020 14:05 | Placebo for LY3819253 700 mg |
| 10161005 | 11818952782 | F3_11818952782_324019w_CF3.fastq.gz   | K814N   | 33.333 | 3.0    | 2324.004750593820  | 3.64 | OPW | 0.0 | 2 | 700 | 30OCT2020 14:05 | Placebo for LY3819253 700 mg |
| 10131011 | 11808471108 | F7_11808471108_324019w_CF7.fastq.gz   | V401A   | 100.0  | 13.0   | 2659.32476635514   | 3.35 | OPW | 0.0 | 2 | 700 | 10NOV2020 10:58 | Placebo for LY3819253 700 mg |
| 10131011 | 11808471108 | F7_11808471108_324019w_CF7.fastq.gz   | R403I   | 84.615 | 13.0   | 2659.32476635514   | 3.35 | OPW | 0.0 | 2 | 700 | 10NOV2020 10:58 | Placebo for LY3819253 700 mg |
| 10131011 | 11808471108 | F7_11808471108_324019w_CF7.fastq.gz   | G404E   | 91.667 | 12.0   | 2659.32476635514   | 3.35 | OPW | 0.0 | 2 | 700 | 10NOV2020 10:58 | Placebo for LY3819253 700 mg |
| 10131011 | 11808471108 | F7_11808471108_324019w_CF7.fastq.gz   | D614G   | 99.868 | 1512.0 | 2659.32476635514   | 3.35 | OPW | 0.0 | 2 | 700 | 10NOV2020 10:58 | Placebo for LY3819253 700 mg |
| 10171002 | 11833637123 | E9_11833637123_324019w_CE9.fastq.gz   | D614G   | 99.837 | 1228.0 | 2196.4539877300600 | 4.14 | OPW | 0.0 | 2 | 700 | 14OCT2020 12:57 | Placebo for LY3819253 700 mg |
| 10171002 | 11833637123 | E9_11833637123_324019w_CE9.fastq.gz   | Q677R   | 57.049 | 1071.0 | 2196.4539877300600 | 4.14 | OPW | 0.0 | 2 | 700 | 14OCT2020 12:57 | Placebo for LY3819253 700 mg |
| 10131010 | 11808472900 | F6_11808472900_324019w_CF6.fastq.gz   | D111N   | 100.0  | 300.0  | 2540.7054545454500 | 3.98 | OPW | 0.0 | 2 | 700 | 10NOV2020 09:04 | Placebo for LY3819253 700 mg |
| 10131010 | 11808472900 | F6_11808472900_324019w_CF6.fastq.gz   | D614G   | 99.858 | 3510.0 | 2540.7054545454500 | 3.98 | OPW | 0.0 | 2 | 700 | 10NOV2020 09:04 | Placebo for LY3819253 700 mg |
| 10131010 | 11808472900 | F6_11808472900_324019w_CF6.fastq.gz   | T732A   | 96.771 | 2075.0 | 2540.7054545454500 | 3.98 | OPW | 0.0 | 2 | 700 | 10NOV2020 09:04 | Placebo for LY3819253 700 mg |
| 10131010 | 11808472900 | F6_11808472900_324019w_CF6.fastq.gz   | K814N   | 50.0   | 2.0    | 2540.7054545454500 | 3.98 | OPW | 0.0 | 2 | 700 | 10NOV2020 09:04 | Placebo for LY3819253 700 mg |
| 10661001 | 11800088262 | D2_11800088262_324019w_CD2.fastq.gz   | D614G   | 99.704 | 1352.0 | 2017.5610913404500 | 7.18 | NPH | 0.0 | 2 | 700 | 09NOV2020 14:48 | Placebo for LY3819253 700 mg |
| 10011023 | 11818949452 | F4_11818949452_324019w_CF4.fastq.gz   | D614G   | 99.823 | 2263.0 | 2513.7670731707300 | 5.74 | OPW | 0.0 | 2 | 700 | 13NOV2020 11:03 | Placebo for LY3819253 700 mg |
| 10011023 | 11818949452 | F4_11818949452_324019w_CF4.fastq.gz   | K814N   | 50.0   | 2.0    | 2513.7670731707300 | 5.74 | OPW | 0.0 | 2 | 700 | 13NOV2020 11:03 | Placebo for LY3819253 700 mg |
| 10201011 | 11818965262 | E11_11818965262_324019w_CE11.fastq.gz | L242F   | 25.234 | 535.0  | 3822.1119221411120 | 4.13 | OPW | 0.0 | 2 | 700 | 27OCT2020 09:30 | Placebo for LY3819253 700 mg |
| 10201011 | 11818965262 | E11_11818965262_324019w_CE11.fastq.gz | D614G   | 99.871 | 5416.0 | 3822.1119221411120 | 4.13 | OPW | 0.0 | 2 | 700 | 27OCT2020 09:30 | Placebo for LY3819253 700 mg |
| 10201011 | 11818965262 | E11_11818965262_324019w_CE11.fastq.gz | K814N   | 42.857 | 7.0    | 3822.1119221411120 | 4.13 | OPW | 0.0 | 2 | 700 | 27OCT2020 09:30 | Placebo for LY3819253 700 mg |
| 10201011 | 11818965262 | E11_11818965262_324019w_CE11.fastq.gz | K814M   | 28.571 | 7.0    | 3822.1119221411120 | 4.13 | OPW | 0.0 | 2 | 700 | 27OCT2020 09:30 | Placebo for LY3819253 700 mg |
| 10261028 | 11850352527 | 30_11850352527_323283w_CG4.fastq.gz   | M177I   | 100.0  | 587.0  | 592.6923076923080  | 5.14 | NPH | 0.0 | 2 | 700 | 29OCT2020 10:41 | LY3819253 700mg IV           |
| 10261028 | 11850352527 | 30_11850352527_323283w_CG4.fastq.gz   | D614G   | 99.796 | 491.0  | 592.6923076923080  | 5.14 | NPH | 0.0 | 2 | 700 | 29OCT2020 10:41 | LY3819253 700mg IV           |
| 10201015 | 11818966796 | 19_11818966796_323283w_CF5.fastq.gz   | D614G   | 99.586 | 483.0  | 595.2924187725630  | 5.3  | NPH | 0.0 | 2 | 700 | 30OCT2020 10:35 | LY3819253 700mg IV           |
| 10221005 | 11839869964 | 2_11839869964_323283w_CD12.fastq.gz   | D614G   | 100.0  | 602.0  | 727.0380835380840  | 4.06 | NPH | 0.0 | 2 | 700 | 23OCT2020 10:11 | Placebo for LY3819253 700 mg |
| 10221005 | 11839869964 | 2_11839869964_323283w_CD12.fastq.gz   | T732A   | 99.782 | 458.0  | 727.0380835380840  | 4.06 | NPH | 0.0 | 2 | 700 | 23OCT2020 10:11 | Placebo for LY3819253 700 mg |
| 10291005 | 11833630018 | 44_11833630018_323283w_CH6.fastq.gz   | D80Y    | 100.0  | 680.0  | 549.3987804878050  | 5.71 | NPH | 0.0 | 2 | 700 | 02NOV2020 11:01 | Placebo for LY3819253 700 mg |
| 10291005 | 11833630018 | 44_11833630018_323283w_CH6.fastq.gz   | D614G   | 100.0  | 425.0  | 549.3987804878050  | 5.71 | NPH | 0.0 | 2 | 700 | 02NOV2020 11:01 | Placebo for LY3819253 700 mg |
| 10291005 | 11833630018 | 44_11833630018_323283w_CH6.fastq.gz   | P681H   | 99.708 | 343.0  | 549.3987804878050  | 5.71 | NPH | 0.0 | 2 | 700 | 02NOV2020 11:01 | Placebo for LY3819253 700 mg |
| 10221006 | 11839867918 | 3_11839867918_323283w_CE1.fastq.gz    | S13I    | 99.705 | 1358.0 | 560.557715674362   | 5.6  | NPH | 0.0 | 2 | 700 | 27OCT2020 08:37 | LY3819253 700mg IV           |
| 10221006 | 11839867918 | 3_11839867918_323283w_CE1.fastq.gz    | W152C   | 99.824 | 568.0  | 560.557715674362   | 5.6  | NPH | 0.0 | 2 | 700 | 27OCT2020 08:37 | LY3819253 700mg IV           |
| 10221006 | 11839867918 | 3_11839867918_323283w_CE1.fastq.gz    | L452R   | 100.0  | 619.0  | 560.557715674362   | 5.6  | NPH | 0.0 | 2 | 700 | 27OCT2020 08:37 | LY3819253 700mg IV           |
| 10221006 | 11839867918 | 3_11839867918_323283w_CE1.fastq.gz    | D614G   | 100.0  | 485.0  | 560.557715674362   | 5.6  | NPH | 0.0 | 2 | 700 | 27OCT2020 08:37 | LY3819253 700mg IV           |
| 10201014 | 11818966797 | 22_11818966797_323283w_CF8.fastq.gz   | D614G   | 99.742 | 1164.0 | 1403.9341463414600 | 4.79 | NPH | 0.0 | 2 | 700 | 30OCT2020 09:50 | Placebo for LY3819253 700 mg |
| 10291002 | 11833628993 | 12_11833628993_323283w_CE10.fastq.gz  | D614G   | 99.91  | 1107.0 | 1272.3420427553400 | 5.44 | NPH | 0.0 | 2 | 700 | 26OCT2020 11:10 | LY3819253 700mg IV           |
| 10201017 | 11820972362 | 18_11820972362_323283w_CF4.fastq.gz   | D614G   | 99.808 | 522.0  | 721.1685116851170  | 4.29 | NPH | 0.0 | 2 | 700 | 02NOV2020 11:29 | LY3819253 700mg IV           |
| 10491001 | 11818971214 | 35_11818971214_323283w_CG9.fastq.gz   | D614G   | 99.807 | 1038.0 | 1268.2091428571400 | 6.93 | NPH | 0.0 | 2 | 700 | 28OCT2020 10:43 | Placebo for LY3819253 700 mg |
| 10491001 | 11818971214 | 35_11818971214_323283w_CG9.fastq.gz   | Y674F   | 99.88  | 834.0  | 1268.2091428571400 | 6.93 | NPH | 0.0 | 2 | 700 | 28OCT2020 10:43 | Placebo for LY3819253 700 mg |
| 10121009 | 11804195395 | 48_11804195395_323283w_CH10.fastq.gz  | D614G   | 99.234 | 522.0  | 734.0615006150060  | 4.11 | NPH | 0.0 | 2 | 700 | 09NOV2020 09:47 | Placebo for LY3819253 700 mg |
| 10261027 | 11816806469 | 11_11816806469_323283w_CE9.fastq.gz   | D614G   | 100.0  | 475.0  | 628.3467643467640  | 4.92 | NPH | 0.0 | 2 | 700 | 26OCT2020 15:30 | LY3819253 700mg IV           |
| 10221007 | 11839931910 | 5_11839931910_323283w_CE3.fastq.gz    | S13I    | 99.976 | 4094.0 | 1467.1344743276300 | 4.21 | NPH | 0.0 | 2 | 700 | 27OCT2020 09:19 | Placebo for LY3819253 700 mg |
| 10221007 | 11839931910 | 5_11839931910_323283w_CE3.fastq.gz    |         |        |        |                    |      |     |     |   |     |                 |                              |

|          |             |                                       |         |        |        |                    |      |     |     |   |     |                 |                              |
|----------|-------------|---------------------------------------|---------|--------|--------|--------------------|------|-----|-----|---|-----|-----------------|------------------------------|
| 10221006 | 11839867916 | A5_11839867916_323692w_NA5.fastq.gz   | S13I    | 99.805 | 6677.0 | 2710.7344701583400 | 5.06 | NAS | 0.0 | 2 | 700 | 27OCT2020 08:36 | LY3819253 700mg IV           |
| 10221006 | 11839867916 | A5_11839867916_323692w_NA5.fastq.gz   | W152C   | 99.704 | 2703.0 | 2710.7344701583400 | 5.06 | NAS | 0.0 | 2 | 700 | 27OCT2020 08:36 | LY3819253 700mg IV           |
| 10221006 | 11839867916 | A5_11839867916_323692w_NA5.fastq.gz   | L452R   | 99.934 | 3016.0 | 2710.7344701583400 | 5.06 | NAS | 0.0 | 2 | 700 | 27OCT2020 08:36 | LY3819253 700mg IV           |
| 10221006 | 11839867916 | A5_11839867916_323692w_NA5.fastq.gz   | D614G   | 99.532 | 2137.0 | 2710.7344701583400 | 5.06 | NAS | 0.0 | 2 | 700 | 27OCT2020 08:36 | LY3819253 700mg IV           |
| 10261032 | 11812605519 | C12_11812605519_323692w_NC12.fastq.gz | W258L   | 61.739 | 2922.0 | 2894.5830303030300 | 6.52 | NAS | 0.0 | 2 | 700 | 12NOV2020 13:08 | Placebo for LY3819253 700 mg |
| 10261032 | 11812605519 | C12_11812605519_323692w_NC12.fastq.gz | D614G   | 99.718 | 1774.0 | 2894.5830303030300 | 6.52 | NAS | 0.0 | 2 | 700 | 12NOV2020 13:08 | Placebo for LY3819253 700 mg |
| 10241006 | 11837829706 | 71_11837829706_323231w_NF11.fastq.gz  | D614G   | 99.93  | 2873.0 | 3975.1508515815100 | 6.42 | NPH | 0.0 | 2 | 700 | 13NOV2020 09:12 | LY3819253 700mg IV           |
| 10241006 | 11837829706 | 71_11837829706_323231w_NF11.fastq.gz  | L821V   | 100.0  | 2.0    | 3975.1508515815100 | 6.42 | NPH | 0.0 | 2 | 700 | 13NOV2020 09:12 | LY3819253 700mg IV           |
| 10131007 | 11850420804 | 56_11850420804_323231w_NE8.fastq.gz   | C15F    | 48.84  | 8624.0 | 3447.829383886260  | 6.8  | NPH | 0.0 | 2 | 700 | 22OCT2020 09:39 | Placebo for LY3819253 700 mg |
| 10131007 | 11850420804 | 56_11850420804_323231w_NE8.fastq.gz   | Y145H   | 30.42  | 3432.0 | 3447.829383886260  | 6.8  | NPH | 0.0 | 2 | 700 | 22OCT2020 09:39 | Placebo for LY3819253 700 mg |
| 10131007 | 11850420804 | 56_11850420804_323231w_NE8.fastq.gz   | D614G   | 99.899 | 2975.0 | 3447.829383886260  | 6.8  | NPH | 0.0 | 2 | 700 | 22OCT2020 09:39 | Placebo for LY3819253 700 mg |
| 10131009 | 11850418758 | 54_11850418758_323231w_NE6.fastq.gz   | F43T    | 63.527 | 7707.0 | 1824.2491103202800 | 7.98 | NPH | 0.0 | 2 | 700 | 04NOV2020 10:38 | LY3819253 700mg IV           |
| 10131009 | 11850418758 | 54_11850418758_323231w_NE6.fastq.gz   | D111N   | 99.631 | 1627.0 | 1824.2491103202800 | 7.98 | NPH | 0.0 | 2 | 700 | 04NOV2020 10:38 | LY3819253 700mg IV           |
| 10131009 | 11850418758 | 54_11850418758_323231w_NE6.fastq.gz   | D614G   | 100.0  | 1370.0 | 1824.2491103202800 | 7.98 | NPH | 0.0 | 2 | 700 | 04NOV2020 10:38 | LY3819253 700mg IV           |
| 10131009 | 11850418758 | 54_11850418758_323231w_NE6.fastq.gz   | T732A   | 99.857 | 697.0  | 1824.2491103202800 | 7.98 | NPH | 0.0 | 2 | 700 | 04NOV2020 10:38 | LY3819253 700mg IV           |
| 10241005 | 11837828169 | 73_11837828169_323231w_NG1.fastq.gz   | D614G   | 99.766 | 1283.0 | 1327.205186020290  | 7.79 | NPH | 0.0 | 2 | 700 | 12NOV2020 08:52 | Placebo for LY3819253 700 mg |
| 10171006 | 11833637378 | 75_11833637378_323231w_NG3.fastq.gz   | D614G   | 99.878 | 821.0  | 1306.75            | 5.7  | NPH | 0.0 | 2 | 700 | 11NOV2020 11:17 | Placebo for LY3819253 700 mg |
| 10311010 | 11854533057 | 8_11854533057_323231w_NA8.fastq.gz    | D614G   | 99.924 | 2632.0 | 3591.4065934065900 | 3.59 | NPH | 0.0 | 2 | 700 | 05NOV2020 08:21 | LY3819253 700mg IV           |
| 10311010 | 11854533057 | 8_11854533057_323231w_NA8.fastq.gz    | P681H   | 99.808 | 2084.0 | 3591.4065934065900 | 3.59 | NPH | 0.0 | 2 | 700 | 05NOV2020 08:21 | LY3819253 700mg IV           |
| 10151004 | 11800016896 | 25_11800016896_323231w_NC1.fastq.gz   | D614G   | 99.689 | 966.0  | 1221.0660146699300 | 4.24 | NPH | 0.0 | 2 | 700 | 12NOV2020 11:04 | Placebo for LY3819253 700 mg |
| 10131010 | 11812669000 | 51_11812669000_323231w_NE3.fastq.gz   | D111N   | 99.941 | 1682.0 | 1679.5360946745600 | 7.66 | NPH | 0.0 | 2 | 700 | 10NOV2020 09:02 | Placebo for LY3819253 700 mg |
| 10131010 | 11812669000 | 51_11812669000_323231w_NE3.fastq.gz   | D614G   | 99.677 | 1550.0 | 1679.5360946745600 | 7.66 | NPH | 0.0 | 2 | 700 | 10NOV2020 09:02 | Placebo for LY3819253 700 mg |
| 10131010 | 11812669000 | 51_11812669000_323231w_NE3.fastq.gz   | T732A   | 99.615 | 779.0  | 1679.5360946745600 | 7.66 | NPH | 0.0 | 2 | 700 | 10NOV2020 09:02 | Placebo for LY3819253 700 mg |
| 10491002 | 11818970958 | 22_11818970958_323231w_NB10.fastq.gz  | D614G   | 99.51  | 816.0  | 1276.8546824542500 | 8.44 | NAS | 0.0 | 2 | 700 | 30OCT2020 10:18 | Placebo for LY3819253 700 mg |
| 10491002 | 11818970958 | 22_11818970958_323231w_NB10.fastq.gz  | E819del | 25.0   | 8.0    | 1276.8546824542500 | 8.44 | NAS | 0.0 | 2 | 700 | 30OCT2020 10:18 | Placebo for LY3819253 700 mg |
| 10491002 | 11818970958 | 22_11818970958_323231w_NB10.fastq.gz  | T1231A  | 100.0  | 1.0    | 1276.8546824542500 | 8.44 | NAS | 0.0 | 2 | 700 | 30OCT2020 10:18 | Placebo for LY3819253 700 mg |
| 10131011 | 11846220289 | 62_11846220289_323231w_NF2.fastq.gz   | D614G   | 99.923 | 2581.0 | 3344.3479853479900 | 4.31 | NAS | 0.0 | 2 | 700 | 10NOV2020 10:57 | Placebo for LY3819253 700 mg |
| 10131011 | 11846220289 | 62_11846220289_323231w_NF2.fastq.gz   | K814N   | 66.667 | 3.0    | 3344.3479853479900 | 4.31 | NAS | 0.0 | 2 | 700 | 10NOV2020 10:57 | Placebo for LY3819253 700 mg |
| 10311007 | 11818959117 | 4_11818959117_323231w_NA4.fastq.gz    | D614G   | 99.875 | 1600.0 | 1874.6369193154000 | 5.88 | NPH | 0.0 | 2 | 700 | 28OCT2020 -2:-2 | Placebo for LY3819253 700 mg |
| 10311007 | 11818959117 | 4_11818959117_323231w_NA4.fastq.gz    | P681H   | 99.538 | 1082.0 | 1874.6369193154000 | 5.88 | NPH | 0.0 | 2 | 700 | 28OCT2020 -2:-2 | Placebo for LY3819253 700 mg |
| 10331006 | 11839926272 | 3_11839926272_323231w_NA3.fastq.gz    | D614G   | 99.858 | 3531.0 | 3981.526690391460  | 5.82 | NPH | 0.0 | 2 | 700 | 05NOV2020 11:55 | LY3819253 700mg IV           |
| 10331006 | 11839926272 | 3_11839926272_323231w_NA3.fastq.gz    | L822V   | 50.0   | 2.0    | 3981.526690391460  | 5.82 | NPH | 0.0 | 2 | 700 | 05NOV2020 11:55 | LY3819253 700mg IV           |
| 10331006 | 11839926272 | 3_11839926272_323231w_NA3.fastq.gz    | F823V   | 50.0   | 2.0    | 3981.526690391460  | 5.82 | NPH | 0.0 | 2 | 700 | 05NOV2020 11:55 | LY3819253 700mg IV           |
| 10141005 | 11806307908 | 69_11806307908_323231w_NF9.fastq.gz   | D614G   | 99.806 | 1549.0 | 2041.0929095354500 | 6.15 | NPH | 0.0 | 2 | 700 | 05NOV2020 11:15 | Placebo for LY3819253 700 mg |
| 10171007 | 11821055937 | 77_11821055937_323231w_NG5.fastq.gz   | D614G   | 99.613 | 1293.0 | 1691.8327228327200 | 5.79 | NPH | 0.0 | 2 | 700 | 12NOV2020 11:00 | LY3819253 700mg IV           |
| 10311008 | 11818959119 | 5_11818959119_323231w_NA5.fastq.gz    | D614G   | 99.657 | 1167.0 | 1520.6650306748500 | 4.22 | NPH | 0.0 | 2 | 700 | 29OCT2020 08:41 | Placebo for LY3819253 700 mg |
| 10311008 | 11818959119 | 5_11818959119_323231w_NA5.fastq.gz    | K814N   | 100.0  | 1.0    | 1520.6650306748500 | 4.22 | NPH | 0.0 | 2 | 700 | 29OCT2020 08:41 | Placebo for LY3819253 700 mg |
| 10201019 | 11818889161 | 17_11818889161_323231w_NB5.fastq.gz   | D614G   | 99.663 | 1187.0 | 1614.8918918918900 | 3.12 | NPH | 0.0 | 2 | 700 | 06NOV2020 08:38 | LY3819253 700mg IV           |
| 10201021 | 11818888897 | 40_11818888897_323231w_ND4.fastq.gz   | D614G   | 99.684 | 949.0  | 1335.5774818401900 | 3.49 | NPH | 0.0 | 2 | 700 | 13NOV2020 09:46 | Placebo for LY3819253 700 mg |
| 10131006 | 11835737921 | 60_11835737921_323231w_NE12.fastq.gz  | D614G   | 99.866 | 3744.0 | 4486.262515262520  | 5.35 | NPH | 0.0 | 2 | 700 | 19OCT2020 09:30 | Placebo for LY3819253 700 mg |
| 10201020 | 11818954122 | 18_11818954122_323231w_NB6.fastq.gz   | D614G   | 99.926 | 1356.0 | 1841.2185592185600 | 5.36 | NPH | 0.0 | 2 | 700 | 09NOV2020 09:44 | Placebo for LY3819253 700 mg |
| 10151003 | 11800017153 | 23_11800017153_323231w_NB11.fastq.gz  | D614G   | 99.875 | 2402.0 | 3206.8961352657000 | 4.01 | NPH | 0.0 | 2 | 700 | 03NOV2020 10:03 | LY3819253 700mg IV           |
| 10161007 | 11818954318 | 65_11818954318_323231w_NF5.fastq.gz   | N501T   | 99.882 | 1701.0 | 1683.3416666666700 | 6.87 | NPH | 0.0 | 2 | 700 | 11NOV2020 11:27 | LY3819253 700mg IV           |
| 10161007 | 11818954318 | 65_11818954318_323231w_NF5.fastq.gz   | D614G   | 99.804 | 1533.0 | 1683.3416666666700 | 6.87 | NPH | 0.0 | 2 | 700 | 11NOV2020 11:27 | LY3819253 700mg IV           |
| 10131008 | 11850352709 | 61_11850352709_323231w_NF1.fastq.gz   | D614G   | 99.905 | 1055.0 | 1413.8339438339400 | 5.38 | NAS | 0.0 | 2 | 700 | 03NOV2020 10:30 | Placebo for LY3819253 700 mg |
| 10121011 | 11804195392 | 33_11804195392_323231w_NC9.fastq.gz   | L54F    | 99.898 | 4888.0 | 1755.1335740072200 | 3.58 | NPH | 0.0 | 2 | 700 | 16NOV2020 08:10 | Placebo for LY3819253 700 mg |
| 10121011 | 11804195392 | 33_11804195392_323231w_NC9.fastq.gz   | D614G   | 99.756 | 1229.0 | 1755.1335740072200 | 3.58 | NPH | 0.0 | 2 | 700 | 16NOV2020 08:10 | Placebo for LY3819253 700 mg |
| 10181010 | 11856628870 | 13_11856628870_323523w_AF11.fastq.gz  | S255F   | 99.82  | 3336.0 | 3780.4311814859900 | 5.82 | NPH | 0.0 | 2 | 700 | 10NOV2020 09:17 | LY3819253 700mg IV           |
| 10181010 | 11856628870 | 13_11856628870_323523w_AF11.fastq.gz  | D614G   | 99.968 | 3151.0 | 3780.4311814859900 | 5.82 | NPH | 0.0 | 2 | 700 | 10NOV2020 09:17 | LY3819253 700mg IV           |
| 10181010 | 11856628870 | 13_11856628870_323523w_AF11.fastq.gz  | P681H   | 99.934 | 3012.0 | 3780.4311814859900 | 5.82 | NPH | 0.0 | 2 | 700 | 10NOV2020 09:17 | LY3819253 700mg IV           |
| 10951003 | 11837774020 | 7_11837774020_323523w_AF5.fastq.gz    | D614G   | 99.848 | 1972.0 | 2436.4182926829300 | 4.52 | NPH | 0.0 | 2 | 700 | 12NOV2020 08:55 | Placebo for LY3819253 700 mg |
| 10291008 | 11833629000 | 6_11833629000_323523w_AF4.fastq.gz    | D614G   | 100.0  | 1587.0 | 1864.1503667481700 | 5.56 | NPH | 0.0 | 2 | 700 | 11NOV2020 12:42 | LY3819253 700mg IV           |
| 10291007 | 11800012553 | 5_11800012553_323523w_AF3.fastq.gz    | D614G   | 100.0  | 1242.0 | 1558.9348894348900 | 4.52 | NPH | 0.0 | 2 | 700 | 06NOV2020 12:27 | LY3819253 700mg IV           |
| 10291007 | 11800012553 | 5_11800012553_323523w_AF3.fastq.gz    | K814M   | 100.0  | 1.0    | 1558.9348894348900 | 4.52 | NPH | 0.0 | 2 | 700 | 06NOV2020 12:27 | LY3819253 700mg IV           |
| 10411003 | 11835727949 | 8_11835727949_323523w_AF6.fastq.gz    | D614G   | 99.879 | 1656.0 | 2148.926650366750  | 6.02 | NPH | 0.0 | 2 | 700 | 13NOV2020 10:40 | LY3819253 700mg IV           |
| 10051004 | 11835657294 | B2_11835657294_324023w_AB2.fastq.gz   | D138H   | 99.802 | 1514.0 | 2028.396937573620  | 6.72 | NPH | 0.0 | 2 | 700 | 20OCT2020 09:34 | LY3819253 700mg IV           |
| 10051004 | 11835657294 | B2_11835657294_324023w_AB2.fastq.gz   | D614G   | 99.86  | 1431.0 | 2028.396937573620  | 6.72 | NPH | 0.0 | 2 | 700 | 20OCT2020 09:34 | LY3819253 700mg IV           |
| 10021003 | 11833555778 | B11_11833555778_324023w_AB11.fastq.gz | D614G   | 99.74  | 1923.0 | 2567.487573964500  | 5.46 | NAS | 0.0 | 2 | 700 | 14OCT2020 08:56 | Placebo for LY3819253 700 mg |
| 10021003 | 11833555778 | B11_11833555778_324023w_AB11.fastq.gz | G832D   | 28.571 | 28.0   | 2567.487573964500  | 5.46 | NAS | 0.0 | 2 | 700 | 14OCT2020 08:56 | Placebo for LY3819253 700 mg |
| 10331002 | 11839860545 | C12_11839860545_324023w_AC12.fastq.gz | D614G   | 99.849 | 1984.0 | 2523.6251526251500 | 3.29 | NPH | 0.0 | 2 | 700 | 16OCT2020 09:00 | LY3819253 700mg IV           |
| 10171002 | 11833637121 | E11_11833637121_324023w_AE11.fastq.gz | D614G   | 99.845 | 1930.0 | 2618.160756501180  | 6.48 | NPH | 0.0 | 2 | 700 | 14OCT2020 12:56 | Placebo for LY3819253 700 mg |
| 10171002 | 11833637121 | E11_11833637121_324023w_AE11.fastq.gz | Q677R   | 99.887 | 1769.0 | 2618.160756501180  | 6.48 | NPH | 0.0 | 2 | 700 | 14OCT2020 12:56 | Placebo for LY3819253 700 mg |
| 10201007 | 11816847426 | E7_11816847426_324023w_AE7.fastq.gz   | D614G   | 99.871 | 1548.0 | 2174.789411764710  | 8.44 | NPH | 0.0 | 2 | 700 | 15OCT2020 10:12 | LY3819253 700mg IV           |
| 10201007 | 11816847426 | E7_11816847426_324023w_AE7.fastq.gz   | P681R   | 100.0  | 1265.0 | 2174.789411764710  | 8.44 | NPH | 0   |   |     |                 |                              |

|          |             |                                       |         |        |        |                    |      |     |     |     |     |                 |                              |
|----------|-------------|---------------------------------------|---------|--------|--------|--------------------|------|-----|-----|-----|-----|-----------------|------------------------------|
| 10141002 | 11806310221 | A5_11806310221_324023w_AA5.fastq.gz   | D614G   | 99.593 | 1476.0 | 2203.3985849056600 | 5.58 | NPH | 0.0 | 2   | 700 | 13OCT2020 12:22 | LY3819253 700mg IV           |
| 10121005 | 11804197187 | A6_11804197187_324023w_AA6.fastq.gz   | D614G   | 99.617 | 1829.0 | 2220.5493421052600 | 8.23 | NPH | 0.0 | 2   | 700 | 21OCT2020 11:12 | Placebo for LY3819253 700 mg |
| 10011014 | 11835664897 | B12_11835664897_324023w_AB12.fastq.gz | D614G   | 100.0  | 1213.0 | 2072.1413173652700 | 3.82 | NPH | 0.0 | 2   | 700 | 21OCT2020 09:40 | LY3819253 700mg IV           |
| 10011014 | 11835664897 | B12_11835664897_324023w_AB12.fastq.gz | F817del | 33.333 | 3.0    | 2072.1413173652700 | 3.82 | NPH | 0.0 | 2   | 700 | 21OCT2020 09:40 | LY3819253 700mg IV           |
| 10011014 | 11835664897 | B12_11835664897_324023w_AB12.fastq.gz | I818del | 33.333 | 3.0    | 2072.1413173652700 | 3.82 | NPH | 0.0 | 2   | 700 | 21OCT2020 09:40 | LY3819253 700mg IV           |
| 10011014 | 11835664897 | B12_11835664897_324023w_AB12.fastq.gz | E819del | 100.0  | 1.0    | 2072.1413173652700 | 3.82 | NPH | 0.0 | 2   | 700 | 21OCT2020 09:40 | LY3819253 700mg IV           |
| 10011014 | 11835664897 | B12_11835664897_324023w_AB12.fastq.gz | D820del | 100.0  | 1.0    | 2072.1413173652700 | 3.82 | NPH | 0.0 | 2   | 700 | 21OCT2020 09:40 | LY3819253 700mg IV           |
| 10011014 | 11835664897 | B12_11835664897_324023w_AB12.fastq.gz | L821del | 100.0  | 1.0    | 2072.1413173652700 | 3.82 | NPH | 0.0 | 2   | 700 | 21OCT2020 09:40 | LY3819253 700mg IV           |
| 10011014 | 11835664897 | B12_11835664897_324023w_AB12.fastq.gz | G832D   | 100.0  | 1.0    | 2072.1413173652700 | 3.82 | NPH | 0.0 | 2   | 700 | 21OCT2020 09:40 | LY3819253 700mg IV           |
| 10171003 | 11833640203 | E10_11833640203_324023w_AE10.fastq.gz | D614G   | 99.728 | 1838.0 | 2566.97146254459   | 3.84 | NPH | 0.0 | 2   | 700 | 14OCT2020 12:55 | LY3819253 700mg IV           |
| 10171003 | 11833640203 | E10_11833640203_324023w_AE10.fastq.gz | Q677R   | 99.791 | 1918.0 | 2566.97146254459   | 3.84 | NPH | 0.0 | 2   | 700 | 14OCT2020 12:55 | LY3819253 700mg IV           |
| 10251007 | 11821044045 | D9_11821044045_324023w_AD9.fastq.gz   | D614G   | 99.851 | 2017.0 | 2500.1946697566600 | 7.65 | NPH | 0.0 | 2   | 700 | 20OCT2020 08:43 | Placebo for LY3819253 700 mg |
| 10251007 | 11821044045 | D9_11821044045_324023w_AD9.fastq.gz   | G832D   | 33.156 | 377.0  | 2500.1946697566600 | 7.65 | NPH | 0.0 | 2   | 700 | 20OCT2020 08:43 | Placebo for LY3819253 700 mg |
| 10261025 | 11816854342 | D3_11816854342_324023w_AD3.fastq.gz   | P272L   | 47.818 | 1100.0 | 2012.4621951219500 | 2.51 | NPH | 0.0 | 2   | 700 | 14OCT2020 13:33 | Placebo for LY3819253 700 mg |
| 10261025 | 11816854342 | D3_11816854342_324023w_AD3.fastq.gz   | N556D   | 99.798 | 1985.0 | 2012.4621951219500 | 2.51 | NPH | 0.0 | 2   | 700 | 14OCT2020 13:33 | Placebo for LY3819253 700 mg |
| 10261025 | 11816854342 | D3_11816854342_324023w_AD3.fastq.gz   | D614G   | 99.845 | 1294.0 | 2012.4621951219500 | 2.51 | NPH | 0.0 | 2   | 700 | 14OCT2020 13:33 | Placebo for LY3819253 700 mg |
| 10261025 | 11816854342 | D3_11816854342_324023w_AD3.fastq.gz   | K814M   | 50.0   | 2.0    | 2012.4621951219500 | 2.51 | NPH | 0.0 | 2   | 700 | 14OCT2020 13:33 | Placebo for LY3819253 700 mg |
| 10261025 | 11816854342 | D3_11816854342_324023w_AD3.fastq.gz   | K814N   | 50.0   | 2.0    | 2012.4621951219500 | 2.51 | NPH | 0.0 | 2   | 700 | 14OCT2020 13:33 | Placebo for LY3819253 700 mg |
| 10221003 | 11839868685 | E2_11839868685_324023w_AE2.fastq.gz   | P82S    | 99.82  | 3341.0 | 3872.3201396973200 | 8.06 | NPH | 0.0 | 2   | 700 | 16OCT2020 09:52 | Placebo for LY3819253 700 mg |
| 10221003 | 11839868685 | E2_11839868685_324023w_AE2.fastq.gz   | D614G   | 99.911 | 3377.0 | 3872.3201396973200 | 8.06 | NPH | 0.0 | 2   | 700 | 16OCT2020 09:52 | Placebo for LY3819253 700 mg |
| 10221003 | 11839868685 | E2_11839868685_324023w_AE2.fastq.gz   | I720V   | 99.823 | 2821.0 | 3872.3201396973200 | 8.06 | NPH | 0.0 | 2   | 700 | 16OCT2020 09:52 | Placebo for LY3819253 700 mg |
| 10161004 | 11839915340 | A1_11839915340_324023w_AA1.fastq.gz   | T547I   | 99.811 | 2649.0 | 1966.2700471698100 | 6.31 | NPH | 0.0 | 2   | 700 | 16OCT2020 13:24 | LY3819253 700mg IV           |
| 10161004 | 11839915340 | A1_11839915340_324023w_AA1.fastq.gz   | D614G   | 99.839 | 1244.0 | 1966.2700471698100 | 6.31 | NPH | 0.0 | 2   | 700 | 16OCT2020 13:24 | LY3819253 700mg IV           |
| 10021004 | 11833554754 | B10_11833554754_324023w_AB10.fastq.gz | S254F   | 99.937 | 1586.0 | 2582.2329873125700 | 6.44 | NPH | 0.0 | 2   | 700 | 19OCT2020 08:38 | LY3819253 700mg IV           |
| 10021004 | 11833554754 | B10_11833554754_324023w_AB10.fastq.gz | L484K   | 61.209 | 5063.0 | 2582.2329873125700 | 6.44 | NPH | 0.0 | 2   | 700 | 19OCT2020 08:38 | LY3819253 700mg IV           |
| 10021004 | 11833554754 | B10_11833554754_324023w_AB10.fastq.gz | D614G   | 99.809 | 2091.0 | 2582.2329873125700 | 6.44 | NPH | 0.0 | 2   | 700 | 19OCT2020 08:38 | LY3819253 700mg IV           |
| 10261024 | 11850404941 | D4_11850404941_324023w_AD4.fastq.gz   | T572I   | 99.844 | 2571.0 | 2527.4324644549800 | 7.38 | NPH | 0.0 | 2   | 700 | 12OCT2020 16:45 | LY3819253 700mg IV           |
| 10261024 | 11850404941 | D4_11850404941_324023w_AD4.fastq.gz   | D614G   | 99.814 | 2148.0 | 2527.4324644549800 | 7.38 | NPH | 0.0 | 2   | 700 | 12OCT2020 16:45 | LY3819253 700mg IV           |
| 10201009 | 11820972361 | E5_11820972361_324023w_AE5.fastq.gz   | L5F     | 99.973 | 3654.0 | 2291.8341463414600 | 3.7  | NPH | 0.0 | 2   | 700 | 21OCT2020 09:05 | Placebo for LY3819253 700 mg |
| 10201009 | 11820972361 | E5_11820972361_324023w_AE5.fastq.gz   | D614G   | 99.936 | 1556.0 | 2291.8341463414600 | 3.7  | NPH | 0.0 | 2   | 700 | 21OCT2020 09:05 | Placebo for LY3819253 700 mg |
| 10051001 | 11835722054 | B5_11835722054_324023w_AB5.fastq.gz   | D614G   | 99.853 | 1360.0 | 2085.2160864345700 | 3.12 | NPH | 0.0 | 2   | 700 | 16OCT2020 10:50 | Placebo for LY3819253 700 mg |
| 10021005 | 11833555784 | B9_11833555784_324023w_AB9.fastq.gz   | D614G   | 99.887 | 1772.0 | 2394.9245283018900 | 6.23 | NPH | 0.0 | 2   | 700 | 20OCT2020 09:03 | LY3819253 700mg IV           |
| 10331001 | 11839925515 | D1_11839925515_324023w_AD1.fastq.gz   | D614G   | 100.0  | 2772.0 | 3586.654028436020  | 6.03 | NPH | 0.0 | 2   | 700 | 14OCT2020 -2:-2 | LY3819253 700mg IV           |
| 10011013 | 11816787784 | C1_11816787784_324023w_AC1.fastq.gz   | W152L   | 99.892 | 922.0  | 1970.9044117647100 | 2.85 | NAS | 0.0 | 2   | 700 | 16OCT2020 10:30 | Placebo for LY3819253 700 mg |
| 10011013 | 11816787784 | C1_11816787784_324023w_AC1.fastq.gz   | V289I   | 99.92  | 1247.0 | 1970.9044117647100 | 2.85 | NAS | 0.0 | 2   | 700 | 16OCT2020 10:30 | Placebo for LY3819253 700 mg |
| 10011013 | 11816787784 | C1_11816787784_324023w_AC1.fastq.gz   | D614G   | 99.755 | 1223.0 | 1970.9044117647100 | 2.85 | NAS | 0.0 | 2   | 700 | 16OCT2020 10:30 | Placebo for LY3819253 700 mg |
| 10221002 | 11839933959 | E3_11839933959_324023w_AE3.fastq.gz   | D614G   | 99.749 | 1596.0 | 2307.6             | 3.96 | NPH | 0.0 | 2   | 700 | 14OCT2020 10:21 | LY3819253 700mg IV           |
| 10031013 | 11802102408 | B7_11802102408_324023w_AB7.fastq.gz   | S13I    | 99.9   | 4013.0 | 2088.0325693606800 | 2.92 | NAS | 0.0 | 2   | 700 | 14OCT2020 12:07 | Placebo for LY3819253 700 mg |
| 10031013 | 11802102408 | B7_11802102408_324023w_AB7.fastq.gz   | W152C   | 99.701 | 1002.0 | 2088.0325693606800 | 2.92 | NAS | 0.0 | 2   | 700 | 14OCT2020 12:07 | Placebo for LY3819253 700 mg |
| 10031013 | 11802102408 | B7_11802102408_324023w_AB7.fastq.gz   | L452R   | 100.0  | 1514.0 | 2088.0325693606800 | 2.92 | NAS | 0.0 | 2   | 700 | 14OCT2020 12:07 | Placebo for LY3819253 700 mg |
| 10031013 | 11802102408 | B7_11802102408_324023w_AB7.fastq.gz   | D614G   | 99.916 | 1194.0 | 2088.0325693606800 | 2.92 | NAS | 0.0 | 2   | 700 | 14OCT2020 12:07 | Placebo for LY3819253 700 mg |
| 10031013 | 11802102408 | B7_11802102408_324023w_AB7.fastq.gz   | G769V   | 99.885 | 871.0  | 2088.0325693606800 | 2.92 | NAS | 0.0 | 2   | 700 | 14OCT2020 12:07 | Placebo for LY3819253 700 mg |
| 10221004 | 11839870214 | E1_11839870214_324023w_AE1.fastq.gz   | P82S    | 99.939 | 1628.0 | 2356.7028301886800 | 6.94 | NPH | 0.0 | 2   | 700 | 16OCT2020 10:35 | Placebo for LY3819253 700 mg |
| 10221004 | 11839870214 | E1_11839870214_324023w_AE1.fastq.gz   | D614G   | 99.683 | 1892.0 | 2356.7028301886800 | 6.94 | NPH | 0.0 | 2   | 700 | 16OCT2020 10:35 | Placebo for LY3819253 700 mg |
| 10221004 | 11839870214 | E1_11839870214_324023w_AE1.fastq.gz   | I720V   | 99.738 | 1529.0 | 2356.7028301886800 | 6.94 | NPH | 0.0 | 2   | 700 | 16OCT2020 10:35 | Placebo for LY3819253 700 mg |
| 10031013 | 11806294663 | G3_11806294663_324020w_NG3.fastq.gz   | K786R   | 1.186  | 843.0  | 2279.7813267813300 | 2.16 | NPH | 0.0 | 2   | 700 | 14OCT2020 12:08 | Placebo for LY3819253 700 mg |
| 10241004 | 11800010503 | 82_11800010503_323284w_NG10.fastq.gz  | T63I    | 2.404  | 832.0  | 578.3679131483720  | 3.24 | NPH | 0.0 | 2   | 700 | 20OCT2020 08:52 | Placebo for LY3819253 700 mg |
| 10241004 | 11800010503 | 82_11800010503_323284w_NG10.fastq.gz  | S172F   | 2.928  | 444.0  | 578.3679131483720  | 3.24 | NPH | 0.0 | 2   | 700 | 20OCT2020 08:52 | Placebo for LY3819253 700 mg |
| 10241004 | 11800010503 | 82_11800010503_323284w_NG10.fastq.gz  | S305F   | 2.041  | 539.0  | 578.3679131483720  | 3.24 | NPH | 0.0 | 2   | 700 | 20OCT2020 08:52 | Placebo for LY3819253 700 mg |
| 10241004 | 11800010503 | 82_11800010503_323284w_NG10.fastq.gz  | I312T   | 1.284  | 545.0  | 578.3679131483720  | 3.24 | NPH | 0.0 | 2   | 700 | 20OCT2020 08:52 | Placebo for LY3819253 700 mg |
| 10241004 | 11800010503 | 82_11800010503_323284w_NG10.fastq.gz  | T323I   | 1.783  | 561.0  | 578.3679131483720  | 3.24 | NPH | 0.0 | 2   | 700 | 20OCT2020 08:52 | Placebo for LY3819253 700 mg |
| 10241004 | 11800010503 | 82_11800010503_323284w_NG10.fastq.gz  | S373L   | 1.862  | 537.0  | 578.3679131483720  | 3.24 | NPH | 0.0 | 2   | 700 | 20OCT2020 08:52 | Placebo for LY3819253 700 mg |
| 10241004 | 11800010503 | 82_11800010503_323284w_NG10.fastq.gz  | R408S   | 1.986  | 554.0  | 578.3679131483720  | 3.24 | NPH | 0.0 | 2   | 700 | 20OCT2020 08:52 | Placebo for LY3819253 700 mg |
| 10241004 | 11800010503 | 82_11800010503_323284w_NG10.fastq.gz  | P463L   | 1.708  | 527.0  | 578.3679131483720  | 3.24 | NPH | 0.0 | 2   | 700 | 20OCT2020 08:52 | Placebo for LY3819253 700 mg |
| 10241004 | 11800010503 | 82_11800010503_323284w_NG10.fastq.gz  | P463T   | 1.328  | 527.0  | 578.3679131483720  | 3.24 | NPH | 0.0 | 2   | 700 | 20OCT2020 08:52 | Placebo for LY3819253 700 mg |
| 10241004 | 11800010503 | 82_11800010503_323284w_NG10.fastq.gz  | G485S   | 1.253  | 479.0  | 578.3679131483720  | 3.24 | NPH | 0.0 | 2   | 700 | 20OCT2020 08:52 | Placebo for LY3819253 700 mg |
| 10241004 | 11800010503 | 82_11800010503_323284w_NG10.fastq.gz  | S494L   | 2.277  | 483.0  | 578.3679131483720  | 3.24 | NPH | 0.0 | 2   | 700 | 20OCT2020 08:52 | Placebo for LY3819253 700 mg |
| 10241004 | 11800010503 | 82_11800010503_323284w_NG10.fastq.gz  | N536Y   | 1.887  | 477.0  | 578.3679131483720  | 3.24 | NPH | 0.0 | 2   | 700 | 20OCT2020 08:52 | Placebo for LY3819253 700 mg |
| 10241004 | 11800010503 | 82_11800010503_323284w_NG10.fastq.gz  | P579S   | 2.174  | 460.0  | 578.3679131483720  | 3.24 | NPH | 0.0 | 2   | 700 | 20OCT2020 08:52 | Placebo for LY3819253 700 mg |
| 10241004 | 11800010503 | 82_11800010503_323284w_NG10.fastq.gz  | T645K   | 2.273  | 396.0  | 578.3679131483720  | 3.24 | NPH | 0.0 | 2   | 700 | 20OCT2020 08:52 | Placebo for LY3819253 700 mg |
| 10241004 | 11800010503 | 82_11800010503_323284w_NG10.fastq.gz  | A672V   | 1.172  | 512.0  | 578.3679131483720  | 3.24 | NPH | 0.0 | 2   | 700 | 20OCT2020 08:52 | Placebo for LY3819253 700 mg |
| 10241004 | 11800010503 | 82_11800010503_323284w_NG10.fastq.gz  | Q779_   | 2.014  | 993.0  | 578.3679131483720  | 3.24 | NPH | 0.0 | 2   | 700 | 20OCT2020 08:52 | Placebo for LY3819253 700 mg |
| 10241004 | 11800010503 | 82_11800010503_323284w_NG10.fastq.gz  | Q784_   | 2.073  | 965.0  | 578.3679131483720  | 3.24 | NPH | 0.0 | 2   | 700 | 20OCT2020 08:52 | Placebo for LY3819253 700 mg |
| 10891002 | 11835748993 | 26_11835748993_323284w_NC2.fastq.gz   | A609V   | 1.874  | 907.0  | 1111.4798534798500 | 4.25 | NPH | 0.0 | 2</ |     |                 |                              |

|          |             |                                      |         |        |        |                    |      |     |     |   |     |                 |                              |
|----------|-------------|--------------------------------------|---------|--------|--------|--------------------|------|-----|-----|---|-----|-----------------|------------------------------|
| 10891007 | 11814700170 | 51_11814700170_323284w_NE3.fastq.gz  | S698L   | 1.695  | 295.0  | 513.8177399756990  | 3.17 | NPH | 0.0 | 2 | 700 | 16NOV2020 15:14 | Placebo for LY3819253 700 mg |
| 10891007 | 11814700170 | 51_11814700170_323284w_NE3.fastq.gz  | M740I   | 1.667  | 240.0  | 513.8177399756990  | 3.17 | NPH | 0.0 | 2 | 700 | 16NOV2020 15:14 | Placebo for LY3819253 700 mg |
| 10371007 | 11833579786 | 29_11833579786_323284w_NC5.fastq.gz  | S686G   | 1.004  | 498.0  | 782.9429569266590  | 6.81 | NPH | 0.0 | 2 | 700 | 06NOV2020 09:40 | Placebo for LY3819253 700 mg |
| 10371007 | 11833579786 | 29_11833579786_323284w_NC5.fastq.gz  | S1003I  | 1.538  | 65.0   | 782.9429569266590  | 6.81 | NPH | 0.0 | 2 | 700 | 06NOV2020 09:40 | Placebo for LY3819253 700 mg |
| 10371007 | 11833579786 | 29_11833579786_323284w_NC5.fastq.gz  | S1021A  | 1.538  | 65.0   | 782.9429569266590  | 6.81 | NPH | 0.0 | 2 | 700 | 06NOV2020 09:40 | Placebo for LY3819253 700 mg |
| 10371008 | 11833581825 | 38_11833581825_323284w_ND2.fastq.gz  | F43T    | 9.533  | 1479.0 | 624.414691943128   | 8.71 | NPH | 0.0 | 2 | 700 | 11NOV2020 12:10 | Placebo for LY3819253 700 mg |
| 10371008 | 11833581825 | 38_11833581825_323284w_ND2.fastq.gz  | Q774R   | 1.364  | 440.0  | 624.414691943128   | 8.71 | NPH | 0.0 | 2 | 700 | 11NOV2020 12:10 | Placebo for LY3819253 700 mg |
| 10371008 | 11833581825 | 38_11833581825_323284w_ND2.fastq.gz  | L822del | 6.25   | 16.0   | 624.414691943128   | 8.71 | NPH | 0.0 | 2 | 700 | 11NOV2020 12:10 | Placebo for LY3819253 700 mg |
| 10511009 | 11800032517 | 84_11800032517_323284w_NG12.fastq.gz | G199V   | 9.795  | 878.0  | 906.6392638036810  | 2.91 | NPH | 0.0 | 2 | 700 | 23OCT2020 12:22 | Placebo for LY3819253 700 mg |
| 10511009 | 11800032517 | 84_11800032517_323284w_NG12.fastq.gz | T547I   | 11.303 | 752.0  | 906.6392638036810  | 2.91 | NPH | 0.0 | 2 | 700 | 23OCT2020 12:22 | Placebo for LY3819253 700 mg |
| 10891005 | 11848304071 | 48_11848304071_323284w_ND12.fastq.gz | C15G    | 1.176  | 2467.0 | 1168.1788321167900 | 3.32 | NPH | 0.0 | 2 | 700 | 13NOV2020 15:45 | Placebo for LY3819253 700 mg |
| 10891005 | 11848304071 | 48_11848304071_323284w_ND12.fastq.gz | C136R   | 1.213  | 907.0  | 1168.1788321167900 | 3.32 | NPH | 0.0 | 2 | 700 | 13NOV2020 15:45 | Placebo for LY3819253 700 mg |
| 10891005 | 11848304071 | 48_11848304071_323284w_ND12.fastq.gz | E180V   | 2.353  | 935.0  | 1168.1788321167900 | 3.32 | NPH | 0.0 | 2 | 700 | 13NOV2020 15:45 | Placebo for LY3819253 700 mg |
| 10891005 | 11848304071 | 48_11848304071_323284w_ND12.fastq.gz | R273K   | 1.751  | 914.0  | 1168.1788321167900 | 3.32 | NPH | 0.0 | 2 | 700 | 13NOV2020 15:45 | Placebo for LY3819253 700 mg |
| 10891005 | 11848304071 | 48_11848304071_323284w_ND12.fastq.gz | C361W   | 1.583  | 1011.0 | 1168.1788321167900 | 3.32 | NPH | 0.0 | 2 | 700 | 13NOV2020 15:45 | Placebo for LY3819253 700 mg |
| 10891005 | 11848304071 | 48_11848304071_323284w_ND12.fastq.gz | G446V   | 4.459  | 1054.0 | 1168.1788321167900 | 3.32 | NPH | 0.0 | 2 | 700 | 13NOV2020 15:45 | Placebo for LY3819253 700 mg |
| 10891005 | 11848304071 | 48_11848304071_323284w_ND12.fastq.gz | S514P   | 2.275  | 967.0  | 1168.1788321167900 | 3.32 | NPH | 0.0 | 2 | 700 | 13NOV2020 15:45 | Placebo for LY3819253 700 mg |
| 10891005 | 11848304071 | 48_11848304071_323284w_ND12.fastq.gz | M740T   | 2.405  | 1164.0 | 1168.1788321167900 | 3.32 | NPH | 0.0 | 2 | 700 | 13NOV2020 15:45 | Placebo for LY3819253 700 mg |
| 10891005 | 11848304071 | 48_11848304071_323284w_ND12.fastq.gz | G799V   | 1.665  | 2342.0 | 1168.1788321167900 | 3.32 | NPH | 0.0 | 2 | 700 | 13NOV2020 15:45 | Placebo for LY3819253 700 mg |
| 10891005 | 11848304071 | 48_11848304071_323284w_ND12.fastq.gz | Q804_   | 1.467  | 2317.0 | 1168.1788321167900 | 3.32 | NPH | 0.0 | 2 | 700 | 13NOV2020 15:45 | Placebo for LY3819253 700 mg |
| 10371009 | 11812654214 | 52_11812654214_323284w_NE4.fastq.gz  | F43Y    | 1.026  | 1072.0 | 541.1631205673760  | 7.08 | NPH | 0.0 | 2 | 700 | 16NOV2020 10:45 | Placebo for LY3819253 700 mg |
| 10371009 | 11812654214 | 52_11812654214_323284w_NE4.fastq.gz  | E819del | 10.0   | 10.0   | 541.1631205673760  | 7.08 | NPH | 0.0 | 2 | 700 | 16NOV2020 10:45 | Placebo for LY3819253 700 mg |
| 10371009 | 11812654214 | 52_11812654214_323284w_NE4.fastq.gz  | D820del | 12.5   | 8.0    | 541.1631205673760  | 7.08 | NPH | 0.0 | 2 | 700 | 16NOV2020 10:45 | Placebo for LY3819253 700 mg |
| 10371009 | 11812654214 | 52_11812654214_323284w_NE4.fastq.gz  | D820Y   | 12.5   | 8.0    | 541.1631205673760  | 7.08 | NPH | 0.0 | 2 | 700 | 16NOV2020 10:45 | Placebo for LY3819253 700 mg |
| 10371009 | 11812654214 | 52_11812654214_323284w_NE4.fastq.gz  | L821del | 12.5   | 8.0    | 541.1631205673760  | 7.08 | NPH | 0.0 | 2 | 700 | 16NOV2020 10:45 | Placebo for LY3819253 700 mg |
| 10251008 | 11854591815 | 86_11854591815_323284w_NH2.fastq.gz  | F43S    | 1.214  | 2307.0 | 891.7832568807340  | 8.08 | NPH | 0.0 | 2 | 700 | 26OCT2020 10:57 | LY3819253 700mg IV           |
| 10251008 | 11854591815 | 86_11854591815_323284w_NH2.fastq.gz  | V785I   | 2.431  | 617.0  | 891.7832568807340  | 8.08 | NPH | 0.0 | 2 | 700 | 26OCT2020 10:57 | LY3819253 700mg IV           |
| 10251008 | 11854591815 | 86_11854591815_323284w_NH2.fastq.gz  | D830G   | 1.087  | 92.0   | 891.7832568807340  | 8.08 | NPH | 0.0 | 2 | 700 | 26OCT2020 10:57 | LY3819253 700mg IV           |
| 10251008 | 11854591815 | 86_11854591815_323284w_NH2.fastq.gz  | A831D   | 1.111  | 90.0   | 891.7832568807340  | 8.08 | NPH | 0.0 | 2 | 700 | 26OCT2020 10:57 | LY3819253 700mg IV           |
| 10251008 | 11854591815 | 86_11854591815_323284w_NH2.fastq.gz  | Y837_   | 1.19   | 84.0   | 891.7832568807340  | 8.08 | NPH | 0.0 | 2 | 700 | 26OCT2020 10:57 | LY3819253 700mg IV           |
| 10951002 | 11837776070 | 31_11837776070_323284w_NC7.fastq.gz  | L841F   | 2.778  | 36.0   | 958.4004400440040  | 8.51 | NPH | 0.0 | 2 | 700 | 09NOV2020 10:35 | LY3819253 700mg IV           |
| 10121006 | 11804195913 | 91_11804195913_323284w_NH7.fastq.gz  | F43T    | 6.176  | 923.0  | 573.5219454329770  | 6.77 | NPH | 0.0 | 2 | 700 | 30OCT2020 11:42 | LY3819253 700mg IV           |
| 10121006 | 11804195913 | 91_11804195913_323284w_NH7.fastq.gz  | Q762P   | 1.064  | 94.0   | 573.5219454329770  | 6.77 | NPH | 0.0 | 2 | 700 | 30OCT2020 11:42 | LY3819253 700mg IV           |
| 10441002 | 11821054019 | 43_11821054019_323284w_ND7.fastq.gz  | F43S    | 2.461  | 2397.0 | 1285.1791221826800 | 6.67 | NPH | 0.0 | 2 | 700 | 12NOV2020 10:25 | LY3819253 700mg IV           |
| 10441002 | 11821054019 | 43_11821054019_323284w_ND7.fastq.gz  | K825E   | 12.5   | 8.0    | 1285.1791221826800 | 6.67 | NPH | 0.0 | 2 | 700 | 12NOV2020 10:25 | LY3819253 700mg IV           |
| 10891001 | 11835746954 | 25_11835746954_323284w_NC1.fastq.gz  | L5F     | 6.901  | 1623.0 | 564.0547445255470  | 3.99 | NPH | 0.0 | 2 | 700 | 05NOV2020 14:33 | Placebo for LY3819253 700 mg |
| 10891001 | 11835746954 | 25_11835746954_323284w_NC1.fastq.gz  | G667del | 2.473  | 364.0  | 564.0547445255470  | 3.99 | NPH | 0.0 | 2 | 700 | 05NOV2020 14:33 | Placebo for LY3819253 700 mg |
| 10891001 | 11835746954 | 25_11835746954_323284w_NC1.fastq.gz  | A668del | 2.55   | 353.0  | 564.0547445255470  | 3.99 | NPH | 0.0 | 2 | 700 | 05NOV2020 14:33 | Placebo for LY3819253 700 mg |
| 10891001 | 11835746954 | 25_11835746954_323284w_NC1.fastq.gz  | G669del | 2.5    | 360.0  | 564.0547445255470  | 3.99 | NPH | 0.0 | 2 | 700 | 05NOV2020 14:33 | Placebo for LY3819253 700 mg |
| 11061003 | 11852451904 | 14_11852451904_323284w_NB2.fastq.gz  | F43T    | 4.762  | 2079.0 | 1206.4608076009500 | 6.27 | NPH | 0.0 | 2 | 700 | 04NOV2020 14:14 | Placebo for LY3819253 700 mg |
| 10441001 | 11821056066 | 36_11821056066_323284w_NC12.fastq.gz | T719N   | 3.799  | 816.0  | 761.5012195121950  | 5.44 | NPH | 0.0 | 2 | 700 | 10NOV2020 10:33 | Placebo for LY3819253 700 mg |
| 10261031 | 11846223687 | 42_11846223687_323284w_ND6.fastq.gz  | K814E   | 2.74   | 73.0   | 564.9750889679720  | 6.13 | NPH | 0.0 | 2 | 700 | 12NOV2020 11:20 | Placebo for LY3819253 700 mg |
| 10261031 | 11846223687 | 42_11846223687_323284w_ND6.fastq.gz  | I818N   | 1.408  | 71.0   | 564.9750889679720  | 6.13 | NPH | 0.0 | 2 | 700 | 12NOV2020 11:20 | Placebo for LY3819253 700 mg |
| 10371004 | 11833647113 | 5_11833647113_323284w_NA5.fastq.gz   | P681L   | 1.163  | 860.0  | 1303.6312576312600 | 4.57 | NPH | 0.0 | 2 | 700 | 02NOV2020 12:50 | Placebo for LY3819253 700 mg |
| 10311005 | 11839927049 | 78_11839927049_323284w_NG6.fastq.gz  | F43T    | 3.545  | 1213.0 | 567.4087759815240  | 7.31 | NPH | 0.0 | 2 | 700 | 22OCT2020 08:16 | Placebo for LY3819253 700 mg |
| 10311005 | 11839927049 | 78_11839927049_323284w_NG6.fastq.gz  | F43S    | 1.649  | 1213.0 | 567.4087759815240  | 7.31 | NPH | 0.0 | 2 | 700 | 22OCT2020 08:16 | Placebo for LY3819253 700 mg |
| 10311005 | 11839927049 | 78_11839927049_323284w_NG6.fastq.gz  | S746A   | 4.706  | 255.0  | 567.4087759815240  | 7.31 | NPH | 0.0 | 2 | 700 | 22OCT2020 08:16 | Placebo for LY3819253 700 mg |
| 10311005 | 11839927049 | 78_11839927049_323284w_NG6.fastq.gz  | I818del | 1.818  | 110.0  | 567.4087759815240  | 7.31 | NPH | 0.0 | 2 | 700 | 22OCT2020 08:16 | Placebo for LY3819253 700 mg |
| 10311005 | 11839927049 | 78_11839927049_323284w_NG6.fastq.gz  | E819del | 5.556  | 36.0   | 567.4087759815240  | 7.31 | NPH | 0.0 | 2 | 700 | 22OCT2020 08:16 | Placebo for LY3819253 700 mg |
| 10311005 | 11839927049 | 78_11839927049_323284w_NG6.fastq.gz  | D820del | 3.333  | 30.0   | 567.4087759815240  | 7.31 | NPH | 0.0 | 2 | 700 | 22OCT2020 08:16 | Placebo for LY3819253 700 mg |
| 10311005 | 11839927049 | 78_11839927049_323284w_NG6.fastq.gz  | L821I   | 3.333  | 30.0   | 567.4087759815240  | 7.31 | NPH | 0.0 | 2 | 700 | 22OCT2020 08:16 | Placebo for LY3819253 700 mg |
| 10311005 | 11839927049 | 78_11839927049_323284w_NG6.fastq.gz  | L822del | 6.25   | 32.0   | 567.4087759815240  | 7.31 | NPH | 0.0 | 2 | 700 | 22OCT2020 08:16 | Placebo for LY3819253 700 mg |
| 10311005 | 11839927049 | 78_11839927049_323284w_NG6.fastq.gz  | K825R   | 6.452  | 31.0   | 567.4087759815240  | 7.31 | NPH | 0.0 | 2 | 700 | 22OCT2020 08:16 | Placebo for LY3819253 700 mg |
| 10371006 | 11833646080 | 16_11833646080_323284w_NB4.fastq.gz  | E819del | 3.226  | 31.0   | 500.14932126696800 | 8.71 | NPH | 0.0 | 2 | 700 | 04NOV2020 14:23 | Placebo for LY3819253 700 mg |
| 10371006 | 11833646080 | 16_11833646080_323284w_NB4.fastq.gz  | D820del | 3.226  | 31.0   | 500.14932126696800 | 8.71 | NPH | 0.0 | 2 | 700 | 04NOV2020 14:23 | Placebo for LY3819253 700 mg |
| 10371006 | 11833646080 | 16_11833646080_323284w_NB4.fastq.gz  | L821del | 3.226  | 31.0   | 500.14932126696800 | 8.71 | NPH | 0.0 | 2 | 700 | 04NOV2020 14:23 | Placebo for LY3819253 700 mg |
| 10491004 | 11818969412 | 9_11818969412_323284w_NA9.fastq.gz   | F43S    | 3.316  | 1176.0 | 601.8681710213780  | 5.97 | NPH | 0.0 | 2 | 700 | 03NOV2020 10:16 | Placebo for LY3819253 700 mg |
| 10021004 | 11833554752 | 39_11833554752_323555w_BD3.fastq.gz  | P322S   | 1.035  | 1353.0 | 1492.452784503630  | 5.81 | NAS | 0.0 | 2 | 700 | 19OCT2020 08:38 | LY3819253 700mg IV           |
| 10021004 | 11833554752 | 39_11833554752_323555w_BD3.fastq.gz  | A348T   | 1.273  | 1335.0 | 1492.452784503630  | 5.81 | NAS | 0.0 | 2 | 700 | 19OCT2020 08:38 | LY3819253 700mg IV           |
| 10021004 | 11833554752 | 39_11833554752_323555w_BD3.fastq.gz  | E484K   | 3.323  | 1354.0 | 1492.452784503630  | 5.81 | NAS | 0.0 | 2 | 700 | 19OCT2020 08:38 | LY3819253 700mg IV           |
| 10021004 | 11833554752 | 39_11833554752_323555w_BD3.fastq.gz  | E484Q   | 3.323  | 1354.0 | 1492.452784503630  | 5.81 | NAS | 0.0 | 2 | 700 | 19OCT2020 08:38 | LY3819253 700mg IV           |
| 10021004 | 11833554752 | 39_11833554752_323555w_BD3.fastq.gz  | S686R   | 1.04   | 962.0  | 1492.452784503630  | 5.81 | NAS | 0.0 | 2 | 700 | 19OCT2020 08:38 | LY3819253 700mg IV           |
| 10021004 | 11833554752 | 39_11833554752_323555w_BD3.fastq.gz  | V705L   | 1.147  | 1046.0 | 1492.452784503630  | 5.81 | NAS | 0.0 | 2 | 700 | 19OCT2020 08:38 | LY3819253 700mg IV           |
| 10021004 | 11833554752 | 39_11833554752_323555w_BD3.fastq.gz  | K814N   | 12.5   | 8.0    | 1492.452784503630  | 5.81 | NAS | 0.0 | 2 | 700 | 19OCT2020 08:38 | LY3819253 700mg IV           |

|          |             |                                       |         |        |         |                    |      |     |     |   |     |                 |                              |
|----------|-------------|---------------------------------------|---------|--------|---------|--------------------|------|-----|-----|---|-----|-----------------|------------------------------|
| 10031020 | 11800069697 | 53_11800069697_323163w_NE5.fastq.gz   | I651del | 10.0   | 690.0   | 1389.2246642246600 | 3.61 | OPW | 0.0 | 2 | 700 | 27OCT2020 09:49 | LY3819253 700mg IV           |
| 10201007 | 11816849739 | 43_11816849739_323163w_ND7.fastq.gz   | W353G   | 2.017  | 1388.0  | 1358.5813953488400 | 5.18 | OPW | 0.0 | 2 | 700 | 15OCT2020 10:13 | LY3819253 700mg IV           |
| 10201007 | 11816849739 | 43_11816849739_323163w_ND7.fastq.gz   | C379R   | 2.806  | 1283.0  | 1358.5813953488400 | 5.18 | OPW | 0.0 | 2 | 700 | 15OCT2020 10:13 | LY3819253 700mg IV           |
| 10201007 | 11816849739 | 43_11816849739_323163w_ND7.fastq.gz   | C391S   | 1.489  | 1343.0  | 1358.5813953488400 | 5.18 | OPW | 0.0 | 2 | 700 | 15OCT2020 10:13 | LY3819253 700mg IV           |
| 10201007 | 11816849739 | 43_11816849739_323163w_ND7.fastq.gz   | V642A   | 1.457  | 961.0   | 1358.5813953488400 | 5.18 | OPW | 0.0 | 2 | 700 | 15OCT2020 10:13 | LY3819253 700mg IV           |
| 10201007 | 11816849739 | 43_11816849739_323163w_ND7.fastq.gz   | S680P   | 1.087  | 828.0   | 1358.5813953488400 | 5.18 | OPW | 0.0 | 2 | 700 | 15OCT2020 10:13 | LY3819253 700mg IV           |
| 10031015 | 11802118087 | 82_11802118087_323163w_NG10.fastq.gz  | D405Y   | 16.667 | 6.0     | 4836.292682926830  | 4.25 | OPW | 0.0 | 2 | 700 | 20OCT2020 10:34 | LY3819253 700mg IV           |
| 10031015 | 11802118087 | 82_11802118087_323163w_NG10.fastq.gz  | D663Y   | 1.246  | 3209.0  | 4836.292682926830  | 4.25 | OPW | 0.0 | 2 | 700 | 20OCT2020 10:34 | LY3819253 700mg IV           |
| 10141003 | 11806308933 | 47_11806308933_323163w_ND11.fastq.gz  | F79S    | 2.853  | 2489.0  | 1854.7847478474800 | 3.82 | OPW | 0.0 | 2 | 700 | 20OCT2020 09:44 | LY3819253 700mg IV           |
| 10291006 | 11833631298 | B2_11833631298_324017w_AG2.fastq.gz   | K424I   | 2.68   | 10000.0 | 3285.1803680981600 | 3.52 | NPH | 0.0 | 2 | 700 | 06NOV2020 12:10 | LY3819253 700mg IV           |
| 10291006 | 11833631298 | B2_11833631298_324017w_AG2.fastq.gz   | V433I   | 1.14   | 10000.0 | 3285.1803680981600 | 3.52 | NPH | 0.0 | 2 | 700 | 06NOV2020 12:10 | LY3819253 700mg IV           |
| 10291006 | 11833631298 | B2_11833631298_324017w_AG2.fastq.gz   | L552P   | 4.085  | 3354.0  | 3285.1803680981600 | 3.52 | NPH | 0.0 | 2 | 700 | 06NOV2020 12:10 | LY3819253 700mg IV           |
| 10181009 | 11856630159 | C5_11856630159_324017w_AH5.fastq.gz   | V433I   | 1.32   | 10000.0 | 2904.5688185140100 | 4.85 | NPH | 0.0 | 2 | 700 | 06NOV2020 09:34 | LY3819253 700mg IV           |
| 10181009 | 11856630159 | C5_11856630159_324017w_AH5.fastq.gz   | E583K   | 1.349  | 2298.0  | 2904.5688185140100 | 4.85 | NPH | 0.0 | 2 | 700 | 06NOV2020 09:34 | LY3819253 700mg IV           |
| 10181009 | 11856630159 | C5_11856630159_324017w_AH5.fastq.gz   | Q804_   | 1.07   | 1682.0  | 2904.5688185140100 | 4.85 | NPH | 0.0 | 2 | 700 | 06NOV2020 09:34 | LY3819253 700mg IV           |
| 10491002 | 11818969413 | A4_11818969413_324017w_AF4.fastq.gz   | H49S    | 1.78   | 2472.0  | 1771.3090909090900 | 8.31 | NPH | 0.0 | 2 | 700 | 30OCT2020 10:20 | Placebo for LY3819253 700 mg |
| 10491002 | 11818969413 | A4_11818969413_324017w_AF4.fastq.gz   | Q52_    | 3.831  | 2271.0  | 1771.3090909090900 | 8.31 | NPH | 0.0 | 2 | 700 | 30OCT2020 10:20 | Placebo for LY3819253 700 mg |
| 10491002 | 11818969413 | A4_11818969413_324017w_AF4.fastq.gz   | V83L    | 18.883 | 985.0   | 1771.3090909090900 | 8.31 | NPH | 0.0 | 2 | 700 | 30OCT2020 10:20 | Placebo for LY3819253 700 mg |
| 10491002 | 11818969413 | A4_11818969413_324017w_AF4.fastq.gz   | G268C   | 5.479  | 803.0   | 1771.3090909090900 | 8.31 | NPH | 0.0 | 2 | 700 | 30OCT2020 10:20 | Placebo for LY3819253 700 mg |
| 10491002 | 11818969413 | A4_11818969413_324017w_AF4.fastq.gz   | K786R   | 1.068  | 562.0   | 1771.3090909090900 | 8.31 | NPH | 0.0 | 2 | 700 | 30OCT2020 10:20 | Placebo for LY3819253 700 mg |
| 10311012 | 11854531011 | B9_11854531011_324017w_AG9.fastq.gz   | V433I   | 1.03   | 10000.0 | 4168.017052375150  | 5.87 | NPH | 0.0 | 2 | 700 | 13NOV2020 08:31 | Placebo for LY3819253 700 mg |
| 10311012 | 11854531011 | B9_11854531011_324017w_AG9.fastq.gz   | R815K   | 1.37   | 73.0    | 4168.017052375150  | 5.87 | NPH | 0.0 | 2 | 700 | 13NOV2020 08:31 | Placebo for LY3819253 700 mg |
| 10261026 | 11816806991 | B5_11816806991_323524w_BB5.fastq.gz   | M1I     | 3.968  | 4612.0  | 1155.7737226277400 | 4.67 | NPH | 0.0 | 2 | 700 | 26OCT2020 14:39 | LY3819253 700mg IV           |
| 10261026 | 11816806991 | B5_11816806991_323524w_BB5.fastq.gz   | H49S    | 1.437  | 3202.0  | 1155.7737226277400 | 4.67 | NPH | 0.0 | 2 | 700 | 26OCT2020 14:39 | LY3819253 700mg IV           |
| 10261026 | 11816806991 | B5_11816806991_323524w_BB5.fastq.gz   | Q52_    | 1.195  | 3013.0  | 1155.7737226277400 | 4.67 | NPH | 0.0 | 2 | 700 | 26OCT2020 14:39 | LY3819253 700mg IV           |
| 10261026 | 11816806991 | B5_11816806991_323524w_BB5.fastq.gz   | A419S   | 2.051  | 1024.0  | 1155.7737226277400 | 4.67 | NPH | 0.0 | 2 | 700 | 26OCT2020 14:39 | LY3819253 700mg IV           |
| 10201011 | 11818966799 | A7_11818966799_323524w_BA7.fastq.gz   | F43T    | 1.258  | 1987.0  | 1180.4024122807000 | 8.23 | NPH | 0.0 | 2 | 700 | 27OCT2020 09:28 | Placebo for LY3819253 700 mg |
| 10201011 | 11818966799 | A7_11818966799_323524w_BA7.fastq.gz   | S172Y   | 5.393  | 1261.0  | 1180.4024122807000 | 8.23 | NPH | 0.0 | 2 | 700 | 27OCT2020 09:28 | Placebo for LY3819253 700 mg |
| 10201011 | 11818966799 | A7_11818966799_323524w_BA7.fastq.gz   | G769E   | 1.169  | 1198.0  | 1180.4024122807000 | 8.23 | NPH | 0.0 | 2 | 700 | 27OCT2020 09:28 | Placebo for LY3819253 700 mg |
| 10131011 | 11812671562 | C11_11812671562_323524w_BC11.fastq.gz | T250I   | 1.042  | 96.0    | 1016.6992840095500 | 5.71 | NPH | 0.0 | 2 | 700 | 10NOV2020 10:57 | Placebo for LY3819253 700 mg |
| 10131011 | 11812671562 | C11_11812671562_323524w_BC11.fastq.gz | F306C   | 1.064  | 94.0    | 1016.6992840095500 | 5.71 | NPH | 0.0 | 2 | 700 | 10NOV2020 10:57 | Placebo for LY3819253 700 mg |
| 10131011 | 11812671562 | C11_11812671562_323524w_BC11.fastq.gz | V308E   | 1.031  | 97.0    | 1016.6992840095500 | 5.71 | NPH | 0.0 | 2 | 700 | 10NOV2020 10:57 | Placebo for LY3819253 700 mg |
| 10131011 | 11812671562 | C11_11812671562_323524w_BC11.fastq.gz | Y313H   | 1.064  | 94.0    | 1016.6992840095500 | 5.71 | NPH | 0.0 | 2 | 700 | 10NOV2020 10:57 | Placebo for LY3819253 700 mg |
| 10131011 | 11812671562 | C11_11812671562_323524w_BC11.fastq.gz | N317D   | 1.163  | 86.0    | 1016.6992840095500 | 5.71 | NPH | 0.0 | 2 | 700 | 10NOV2020 10:57 | Placebo for LY3819253 700 mg |
| 10131011 | 11812671562 | C11_11812671562_323524w_BC11.fastq.gz | F329I   | 1.075  | 93.0    | 1016.6992840095500 | 5.71 | NPH | 0.0 | 2 | 700 | 10NOV2020 10:57 | Placebo for LY3819253 700 mg |
| 10131011 | 11812671562 | C11_11812671562_323524w_BC11.fastq.gz | T345N   | 1.031  | 97.0    | 1016.6992840095500 | 5.71 | NPH | 0.0 | 2 | 700 | 10NOV2020 10:57 | Placebo for LY3819253 700 mg |
| 10131011 | 11812671562 | C11_11812671562_323524w_BC11.fastq.gz | L425S   | 1.042  | 96.0    | 1016.6992840095500 | 5.71 | NPH | 0.0 | 2 | 700 | 10NOV2020 10:57 | Placebo for LY3819253 700 mg |
| 10131011 | 11812671562 | C11_11812671562_323524w_BC11.fastq.gz | D427E   | 1.064  | 94.0    | 1016.6992840095500 | 5.71 | NPH | 0.0 | 2 | 700 | 10NOV2020 10:57 | Placebo for LY3819253 700 mg |
| 10131011 | 11812671562 | C11_11812671562_323524w_BC11.fastq.gz | C432G   | 1.075  | 93.0    | 1016.6992840095500 | 5.71 | NPH | 0.0 | 2 | 700 | 10NOV2020 10:57 | Placebo for LY3819253 700 mg |
| 10131011 | 11812671562 | C11_11812671562_323524w_BC11.fastq.gz | A435V   | 1.053  | 95.0    | 1016.6992840095500 | 5.71 | NPH | 0.0 | 2 | 700 | 10NOV2020 10:57 | Placebo for LY3819253 700 mg |
| 10131011 | 11812671562 | C11_11812671562_323524w_BC11.fastq.gz | S443Y   | 1.01   | 99.0    | 1016.6992840095500 | 5.71 | NPH | 0.0 | 2 | 700 | 10NOV2020 10:57 | Placebo for LY3819253 700 mg |
| 10131011 | 11812671562 | C11_11812671562_323524w_BC11.fastq.gz | R457W   | 1.163  | 86.0    | 1016.6992840095500 | 5.71 | NPH | 0.0 | 2 | 700 | 10NOV2020 10:57 | Placebo for LY3819253 700 mg |
| 10131011 | 11812671562 | C11_11812671562_323524w_BC11.fastq.gz | P479R   | 1.282  | 78.0    | 1016.6992840095500 | 5.71 | NPH | 0.0 | 2 | 700 | 10NOV2020 10:57 | Placebo for LY3819253 700 mg |
| 10131011 | 11812671562 | C11_11812671562_323524w_BC11.fastq.gz | V483D   | 1.299  | 77.0    | 1016.6992840095500 | 5.71 | NPH | 0.0 | 2 | 700 | 10NOV2020 10:57 | Placebo for LY3819253 700 mg |
| 10131011 | 11812671562 | C11_11812671562_323524w_BC11.fastq.gz | E516Q   | 3.75   | 80.0    | 1016.6992840095500 | 5.71 | NPH | 0.0 | 2 | 700 | 10NOV2020 10:57 | Placebo for LY3819253 700 mg |
| 10131011 | 11812671562 | C11_11812671562_323524w_BC11.fastq.gz | E516D   | 1.25   | 80.0    | 1016.6992840095500 | 5.71 | NPH | 0.0 | 2 | 700 | 10NOV2020 10:57 | Placebo for LY3819253 700 mg |
| 10131011 | 11812671562 | C11_11812671562_323524w_BC11.fastq.gz | N536I   | 1.149  | 87.0    | 1016.6992840095500 | 5.71 | NPH | 0.0 | 2 | 700 | 10NOV2020 10:57 | Placebo for LY3819253 700 mg |
| 10131011 | 11812671562 | C11_11812671562_323524w_BC11.fastq.gz | N542D   | 1.124  | 89.0    | 1016.6992840095500 | 5.71 | NPH | 0.0 | 2 | 700 | 10NOV2020 10:57 | Placebo for LY3819253 700 mg |
| 10131011 | 11812671562 | C11_11812671562_323524w_BC11.fastq.gz | T553A   | 1.075  | 93.0    | 1016.6992840095500 | 5.71 | NPH | 0.0 | 2 | 700 | 10NOV2020 10:57 | Placebo for LY3819253 700 mg |
| 10131011 | 11812671562 | C11_11812671562_323524w_BC11.fastq.gz | G566A   | 1.064  | 94.0    | 1016.6992840095500 | 5.71 | NPH | 0.0 | 2 | 700 | 10NOV2020 10:57 | Placebo for LY3819253 700 mg |
| 10131011 | 11812671562 | C11_11812671562_323524w_BC11.fastq.gz | L585F   | 1.087  | 92.0    | 1016.6992840095500 | 5.71 | NPH | 0.0 | 2 | 700 | 10NOV2020 10:57 | Placebo for LY3819253 700 mg |
| 10131011 | 11812671562 | C11_11812671562_323524w_BC11.fastq.gz | T602A   | 1.176  | 85.0    | 1016.6992840095500 | 5.71 | NPH | 0.0 | 2 | 700 | 10NOV2020 10:57 | Placebo for LY3819253 700 mg |
| 10421018 | 11852447885 | G5_11852447885_323524w_BG5.fastq.gz   | S686G   | 1.027  | 876.0   | 1305.6560975609800 | 6.96 | NPH | 0.0 | 2 | 700 | 16NOV2020 09:33 | LY3819253 700mg IV           |
| 10421017 | 11852446087 | G1_11852446087_323524w_BG1.fastq.gz   | L752P   | 1.136  | 264.0   | 1051.0619684082600 | 3.88 | NPH | 0.0 | 2 | 700 | 10NOV2020 09:32 | LY3819253 700mg IV           |
| 10261030 | 11850354574 | E7_11850354574_323524w_BE7.fastq.gz   | T20I    | 4.368  | 3022.0  | 1097.8092345079000 | 8.37 | NPH | 0.0 | 2 | 700 | 04NOV2020 16:36 | LY3819253 700mg IV           |
| 10261030 | 11850354574 | E7_11850354574_323524w_BE7.fastq.gz   | K41N    | 1.731  | 1906.0  | 1097.8092345079000 | 8.37 | NPH | 0.0 | 2 | 700 | 04NOV2020 16:36 | LY3819253 700mg IV           |
| 10261030 | 11850354574 | E7_11850354574_323524w_BE7.fastq.gz   | F43T    | 5.638  | 1898.0  | 1097.8092345079000 | 8.37 | NPH | 0.0 | 2 | 700 | 04NOV2020 16:36 | LY3819253 700mg IV           |
| 10261030 | 11850354574 | E7_11850354574_323524w_BE7.fastq.gz   | F86I    | 1.19   | 1008.0  | 1097.8092345079000 | 8.37 | NPH | 0.0 | 2 | 700 | 04NOV2020 16:36 | LY3819253 700mg IV           |
| 10081010 | 11821060040 | C7_11821060040_323524w_BC7.fastq.gz   | G798C   | 2.607  | 1189.0  | 1120.8168498168500 | 6.0  | NPH | 0.0 | 2 | 700 | 14NOV2020 10:46 | LY3819253 700mg IV           |
| 10181008 | 11802116997 | A9_11802116997_323524w_BA9.fastq.gz   | Y144F   | 1.004  | 498.0   | 1503.2570379437000 | 3.94 | NPH | 0.0 | 2 | 700 | 15OCT2020 08:37 | LY3819253 700mg IV           |
| 10031027 | 11812671561 | H10_11812671561_323524w_BH10.fastq.gz | F43S    | 3.333  | 1950.0  | 1298.5243309002400 | 7.43 | NPH | 0.0 | 2 | 700 | 13NOV2020 11:43 | Placebo for LY3819253 700 mg |
| 10031027 | 11812671561 | H10_11812671561_323524w_BH10.fastq.gz | F43T    | 2.308  | 1950.0  | 1298.5243309002400 | 7.43 | NPH | 0.0 | 2 | 700 | 13NOV2020 11:43 | Placebo for LY3819253 700 mg |
| 10031027 | 11812671561 | H10_11812671561_323524w_BH10.fastq.gz | S98F    | 1.027  | 1168.0  | 1298.5243309002400 | 7.43 | NPH | 0.0 | 2 | 700 | 13NOV2020 11:43 | Placebo for LY3819253 700 mg |
| 10421007 | 11818876167 | 83_11818876167_323232w_AG11.fastq.gz  | E819del | 5.128  | 39.0    | 1843.4341637010700 | 7.64 | NPH | 0.0 | 2 | 700 | 15OCT2020 09:56 | Placebo for LY38             |

|          |             |                                     |         |        |         |                    |      |     |     |   |     |                 |                              |
|----------|-------------|-------------------------------------|---------|--------|---------|--------------------|------|-----|-----|---|-----|-----------------|------------------------------|
| 10561004 | 11839940419 | 41_11839940419_323232w_AD5.fastq.gz | F823del | 1.163  | 86.0    | 1781.4453584018800 | 8.22 | NPH | 0.0 | 2 | 700 | 26OCT2020 09:08 | Placebo for LY3819253 700 mg |
| 10561004 | 11839940419 | 41_11839940419_323232w_AD5.fastq.gz | G832A   | 1.266  | 79.0    | 1781.4453584018800 | 8.22 | NPH | 0.0 | 2 | 700 | 26OCT2020 09:08 | Placebo for LY3819253 700 mg |
| 10031028 | 11812669761 | 68_11812669761_323232w_AF8.fastq.gz | V11A    | 5.541  | 3393.0  | 868.7612667478690  | 2.55 | NPH | 0.0 | 2 | 700 | 13NOV2020 12:59 | LY3819253 700mg IV           |
| 10031028 | 11812669761 | 68_11812669761_323232w_AF8.fastq.gz | L18F    | 5.242  | 3415.0  | 868.7612667478690  | 2.55 | NPH | 0.0 | 2 | 700 | 13NOV2020 12:59 | LY3819253 700mg IV           |
| 10031028 | 11812669761 | 68_11812669761_323232w_AF8.fastq.gz | Q134H   | 2.538  | 788.0   | 868.7612667478690  | 2.55 | NPH | 0.0 | 2 | 700 | 13NOV2020 12:59 | LY3819253 700mg IV           |
| 10031028 | 11812669761 | 68_11812669761_323232w_AF8.fastq.gz | Q314K   | 8.234  | 838.0   | 868.7612667478690  | 2.55 | NPH | 0.0 | 2 | 700 | 13NOV2020 12:59 | LY3819253 700mg IV           |
| 10031028 | 11812669761 | 68_11812669761_323232w_AF8.fastq.gz | T478S   | 4.595  | 827.0   | 868.7612667478690  | 2.55 | NPH | 0.0 | 2 | 700 | 13NOV2020 12:59 | LY3819253 700mg IV           |
| 10031028 | 11812669761 | 68_11812669761_323232w_AF8.fastq.gz | V576A   | 2.11   | 711.0   | 868.7612667478690  | 2.55 | NPH | 0.0 | 2 | 700 | 13NOV2020 12:59 | LY3819253 700mg IV           |
| 10031028 | 11812669761 | 68_11812669761_323232w_AF8.fastq.gz | H655Y   | 2.564  | 585.0   | 868.7612667478690  | 2.55 | NPH | 0.0 | 2 | 700 | 13NOV2020 12:59 | LY3819253 700mg IV           |
| 10031028 | 11812669761 | 68_11812669761_323232w_AF8.fastq.gz | T719I   | 4.858  | 494.0   | 868.7612667478690  | 2.55 | NPH | 0.0 | 2 | 700 | 13NOV2020 12:59 | LY3819253 700mg IV           |
| 10031028 | 11812669761 | 68_11812669761_323232w_AF8.fastq.gz | K790T   | 9.659  | 176.0   | 868.7612667478690  | 2.55 | NPH | 0.0 | 2 | 700 | 13NOV2020 12:59 | LY3819253 700mg IV           |
| 10561003 | 11839940427 | 13_11839940427_323232w_AB1.fastq.gz | P809S   | 12.762 | 956.0   | 2426.975147928990  | 6.52 | NPH | 0.0 | 2 | 700 | 26OCT2020 13:25 | Placebo for LY3819253 700 mg |
| 10561003 | 11839940427 | 13_11839940427_323232w_AB1.fastq.gz | E819del | 4.167  | 24.0    | 2426.975147928990  | 6.52 | NPH | 0.0 | 2 | 700 | 26OCT2020 13:25 | Placebo for LY3819253 700 mg |
| 10561003 | 11839940427 | 13_11839940427_323232w_AB1.fastq.gz | D820del | 7.143  | 14.0    | 2426.975147928990  | 6.52 | NPH | 0.0 | 2 | 700 | 26OCT2020 13:25 | Placebo for LY3819253 700 mg |
| 10561003 | 11839940427 | 13_11839940427_323232w_AB1.fastq.gz | L821del | 7.692  | 13.0    | 2426.975147928990  | 6.52 | NPH | 0.0 | 2 | 700 | 26OCT2020 13:25 | Placebo for LY3819253 700 mg |
| 10561005 | 11839942466 | 43_11839942466_323232w_AD7.fastq.gz | E819del | 1.471  | 68.0    | 1861.7516853932600 | 7.91 | NPH | 0.0 | 2 | 700 | 27OCT2020 11:55 | Placebo for LY3819253 700 mg |
| 10561005 | 11839942466 | 43_11839942466_323232w_AD7.fastq.gz | D820del | 1.639  | 61.0    | 1861.7516853932600 | 7.91 | NPH | 0.0 | 2 | 700 | 27OCT2020 11:55 | Placebo for LY3819253 700 mg |
| 10561005 | 11839942466 | 43_11839942466_323232w_AD7.fastq.gz | L821del | 1.667  | 60.0    | 1861.7516853932600 | 7.91 | NPH | 0.0 | 2 | 700 | 27OCT2020 11:55 | Placebo for LY3819253 700 mg |
| 10561005 | 11839942466 | 43_11839942466_323232w_AD7.fastq.gz | N824H   | 1.786  | 56.0    | 1861.7516853932600 | 7.91 | NPH | 0.0 | 2 | 700 | 27OCT2020 11:55 | Placebo for LY3819253 700 mg |
| 10561005 | 11839942466 | 43_11839942466_323232w_AD7.fastq.gz | F833L   | 2.0    | 50.0    | 1861.7516853932600 | 7.91 | NPH | 0.0 | 2 | 700 | 27OCT2020 11:55 | Placebo for LY3819253 700 mg |
| 10421015 | 11821000197 | 6_11821000197_323232w_AA6.fastq.gz  | F823C   | 1.053  | 190.0   | 3839.3602150537600 | 7.67 | NPH | 0.0 | 2 | 700 | 04NOV2020 09:33 | Placebo for LY3819253 700 mg |
| 10421015 | 11821000197 | 6_11821000197_323232w_AA6.fastq.gz  | V826A   | 1.075  | 186.0   | 3839.3602150537600 | 7.67 | NPH | 0.0 | 2 | 700 | 04NOV2020 09:33 | Placebo for LY3819253 700 mg |
| 10031025 | 11846219522 | 52_11846219522_323232w_AE4.fastq.gz | S98F    | 1.453  | 4611.0  | 4285.228944246740  | 4.94 | NAS | 0.0 | 2 | 700 | 10NOV2020 12:42 | LY3819253 700mg IV           |
| 10031025 | 11846219522 | 52_11846219522_323232w_AE4.fastq.gz | P793S   | 2.683  | 1640.0  | 4285.228944246740  | 4.94 | NAS | 0.0 | 2 | 700 | 10NOV2020 12:42 | LY3819253 700mg IV           |
| 10421009 | 11818878212 | 21_11818878212_323232w_AB9.fastq.gz | L822del | 6.25   | 16.0    | 3865.628266033250  | 6.71 | NPH | 0.0 | 2 | 700 | 22OCT2020 09:34 | Placebo for LY3819253 700 mg |
| 10051002 | 11835721540 | B4_21540_322773w_NB4.fastq.gz       | K444N   | 1.35   | 10000.0 | 4184.483731019520  | 6.4  | NPH | 0.0 | 2 | 700 | 19OCT2020 12:05 | Placebo for LY3819253 700 mg |
| 10051002 | 11835721540 | B4_21540_322773w_NB4.fastq.gz       | V445F   | 1.34   | 10000.0 | 4184.483731019520  | 6.4  | NPH | 0.0 | 2 | 700 | 19OCT2020 12:05 | Placebo for LY3819253 700 mg |
| 10051002 | 11835721540 | B4_21540_322773w_NB4.fastq.gz       | K786R   | 1.861  | 1988.0  | 4184.483731019520  | 6.4  | NPH | 0.0 | 2 | 700 | 19OCT2020 12:05 | Placebo for LY3819253 700 mg |
| 10051002 | 11835721540 | B4_21540_322773w_NB4.fastq.gz       | K814del | 2.222  | 45.0    | 4184.483731019520  | 6.4  | NPH | 0.0 | 2 | 700 | 19OCT2020 12:05 | Placebo for LY3819253 700 mg |
| 10051002 | 11835721540 | B4_21540_322773w_NB4.fastq.gz       | R815del | 2.174  | 46.0    | 4184.483731019520  | 6.4  | NPH | 0.0 | 2 | 700 | 19OCT2020 12:05 | Placebo for LY3819253 700 mg |
| 10051002 | 11835721540 | B4_21540_322773w_NB4.fastq.gz       | S816del | 2.174  | 46.0    | 4184.483731019520  | 6.4  | NPH | 0.0 | 2 | 700 | 19OCT2020 12:05 | Placebo for LY3819253 700 mg |
| 10051002 | 11835721540 | B4_21540_322773w_NB4.fastq.gz       | F817del | 2.174  | 46.0    | 4184.483731019520  | 6.4  | NPH | 0.0 | 2 | 700 | 19OCT2020 12:05 | Placebo for LY3819253 700 mg |
| 10051002 | 11835721540 | B4_21540_322773w_NB4.fastq.gz       | I818del | 2.174  | 46.0    | 4184.483731019520  | 6.4  | NPH | 0.0 | 2 | 700 | 19OCT2020 12:05 | Placebo for LY3819253 700 mg |
| 10051002 | 11835721540 | B4_21540_322773w_NB4.fastq.gz       | E819del | 4.0    | 25.0    | 4184.483731019520  | 6.4  | NPH | 0.0 | 2 | 700 | 19OCT2020 12:05 | Placebo for LY3819253 700 mg |
| 10051002 | 11835721540 | B4_21540_322773w_NB4.fastq.gz       | D820A   | 4.545  | 22.0    | 4184.483731019520  | 6.4  | NPH | 0.0 | 2 | 700 | 19OCT2020 12:05 | Placebo for LY3819253 700 mg |
| 10051002 | 11835721540 | B4_21540_322773w_NB4.fastq.gz       | L822del | 4.348  | 23.0    | 4184.483731019520  | 6.4  | NPH | 0.0 | 2 | 700 | 19OCT2020 12:05 | Placebo for LY3819253 700 mg |
| 10051002 | 11835721540 | B4_21540_322773w_NB4.fastq.gz       | N824D   | 4.348  | 23.0    | 4184.483731019520  | 6.4  | NPH | 0.0 | 2 | 700 | 19OCT2020 12:05 | Placebo for LY3819253 700 mg |
| 10051002 | 11835721540 | B4_21540_322773w_NB4.fastq.gz       | G832D   | 17.391 | 23.0    | 4184.483731019520  | 6.4  | NPH | 0.0 | 2 | 700 | 19OCT2020 12:05 | Placebo for LY3819253 700 mg |
| 10051003 | 11835721807 | B3_21807_322773w_NB3.fastq.gz       | K786R   | 2.814  | 2132.0  | 4293.772727272730  | 8.3  | NPH | 0.0 | 2 | 700 | 20OCT2020 09:51 | LY3819253 700mg IV           |
| 10051003 | 11835721807 | B3_21807_322773w_NB3.fastq.gz       | E819del | 2.039  | 932.0   | 4293.772727272730  | 8.3  | NPH | 0.0 | 2 | 700 | 20OCT2020 09:51 | LY3819253 700mg IV           |
| 10051003 | 11835721807 | B3_21807_322773w_NB3.fastq.gz       | D820del | 2.167  | 923.0   | 4293.772727272730  | 8.3  | NPH | 0.0 | 2 | 700 | 20OCT2020 09:51 | LY3819253 700mg IV           |
| 10051003 | 11835721807 | B3_21807_322773w_NB3.fastq.gz       | L821del | 1.868  | 910.0   | 4293.772727272730  | 8.3  | NPH | 0.0 | 2 | 700 | 20OCT2020 09:51 | LY3819253 700mg IV           |
| 10051003 | 11835721807 | B3_21807_322773w_NB3.fastq.gz       | L822del | 2.083  | 912.0   | 4293.772727272730  | 8.3  | NPH | 0.0 | 2 | 700 | 20OCT2020 09:51 | LY3819253 700mg IV           |
| 10051003 | 11835721807 | B3_21807_322773w_NB3.fastq.gz       | G832D   | 12.807 | 773.0   | 4293.772727272730  | 8.3  | NPH | 0.0 | 2 | 700 | 20OCT2020 09:51 | LY3819253 700mg IV           |
| 10241003 | 11837830208 | E5_30208_322773w_NE5.fastq.gz       | K786R   | 1.728  | 463.0   | 1940.7512077294700 | 2.15 | NPH | 0.0 | 2 | 700 | 16OCT2020 09:42 | Placebo for LY3819253 700 mg |
| 10081003 | 11837820421 | A9_20421_322773w_NA9.fastq.gz       | K786R   | 2.775  | 1874.0  | 4613.3938053097300 | 7.64 | NPH | 0.0 | 2 | 700 | 12OCT2020 12:01 | Placebo for LY3819253 700 mg |
| 10081003 | 11837820421 | A9_20421_322773w_NA9.fastq.gz       | G832D   | 13.883 | 461.0   | 4613.3938053097300 | 7.64 | NPH | 0.0 | 2 | 700 | 12OCT2020 12:01 | Placebo for LY3819253 700 mg |
| 10251006 | 11850336526 | E4_36526_322773w_NE4.fastq.gz       | K786R   | 1.649  | 1759.0  | 4615.490022172950  | 7.2  | NPH | 0.0 | 2 | 700 | 15OCT2020 09:48 | Placebo for LY3819253 700 mg |
| 10251006 | 11850336526 | E4_36526_322773w_NE4.fastq.gz       | L822del | 5.0    | 20.0    | 4615.490022172950  | 7.2  | NPH | 0.0 | 2 | 700 | 15OCT2020 09:48 | Placebo for LY3819253 700 mg |
| 10411002 | 11835728709 | H7_11835728709_323513w_NH7.fastq.gz | V62F    | 1.282  | 2653.0  | 1772.0426309378800 | 4.12 | NPH | 0.0 | 2 | 700 | 10NOV2020 09:46 | LY3819253 700mg IV           |
| 10411002 | 11835728709 | H7_11835728709_323513w_NH7.fastq.gz | S459F   | 1.015  | 1773.0  | 1772.0426309378800 | 4.12 | NPH | 0.0 | 2 | 700 | 10NOV2020 09:46 | LY3819253 700mg IV           |
| 10411002 | 11835728709 | H7_11835728709_323513w_NH7.fastq.gz | G485S   | 1.082  | 1663.0  | 1772.0426309378800 | 4.12 | NPH | 0.0 | 2 | 700 | 10NOV2020 09:46 | LY3819253 700mg IV           |
| 10411002 | 11835728709 | H7_11835728709_323513w_NH7.fastq.gz | P665del | 1.329  | 1204.0  | 1772.0426309378800 | 4.12 | NPH | 0.0 | 2 | 700 | 10NOV2020 09:46 | LY3819253 700mg IV           |
| 10411002 | 11835728709 | H7_11835728709_323513w_NH7.fastq.gz | I666del | 1.33   | 1203.0  | 1772.0426309378800 | 4.12 | NPH | 0.0 | 2 | 700 | 10NOV2020 09:46 | LY3819253 700mg IV           |
| 10411002 | 11835728709 | H7_11835728709_323513w_NH7.fastq.gz | G667del | 1.288  | 1242.0  | 1772.0426309378800 | 4.12 | NPH | 0.0 | 2 | 700 | 10NOV2020 09:46 | LY3819253 700mg IV           |
| 10411002 | 11835728709 | H7_11835728709_323513w_NH7.fastq.gz | A668del | 1.297  | 1234.0  | 1772.0426309378800 | 4.12 | NPH | 0.0 | 2 | 700 | 10NOV2020 09:46 | LY3819253 700mg IV           |
| 10411002 | 11835728709 | H7_11835728709_323513w_NH7.fastq.gz | A771S   | 1.977  | 607.0   | 1772.0426309378800 | 4.12 | NPH | 0.0 | 2 | 700 | 10NOV2020 09:46 | LY3819253 700mg IV           |
| 10051005 | 11835721293 | 45_21293_322851w_CD9.fastq.gz       | E819del | 6.977  | 86.0    | 1305.1413911060400 | 7.97 | NPH | 0.0 | 2 | 700 | 28OCT2020 09:51 | LY3819253 700mg IV           |
| 10051005 | 11835721293 | 45_21293_322851w_CD9.fastq.gz       | D820del | 6.329  | 79.0    | 1305.1413911060400 | 7.97 | NPH | 0.0 | 2 | 700 | 28OCT2020 09:51 | LY3819253 700mg IV           |
| 10051005 | 11835721293 | 45_21293_322851w_CD9.fastq.gz       | L821del | 6.25   | 80.0    | 1305.1413911060400 | 7.97 | NPH | 0.0 | 2 | 700 | 28OCT2020 09:51 | LY3819253 700mg IV           |
| 10051005 | 11835721293 | 45_21293_322851w_CD9.fastq.gz       | L822del | 6.329  | 79.0    | 1305.1413911060400 | 7.97 | NPH | 0.0 | 2 | 700 | 28OCT2020 09:51 | LY3819253 700mg IV           |
| 10051005 | 11835721293 | 45_21293_322851w_CD9.fastq.gz       | F823del | 1.25   | 80.0    | 1305.1413911060400 | 7.97 | NPH | 0.0 | 2 | 700 | 28OCT2020 09:51 | LY3819253 700mg IV           |
| 10011015 | 11816786496 | 14_86496_322851w_CB2.fastq.gz       | P561R   | 4.574  | 962.0   | 1133.7052375152300 | 4.73 | NAS | 0.0 | 2 | 700 | 27OCT2020 09:12 | LY3819253 700mg IV           |
| 10011015 | 11816786496 | 14_86496_322851w_CB2.fastq.gz       | K814N   | 11.111 | 9.0     | 1133.7052375152300 | 4.73 | NAS | 0.0 | 2 | 700 | 27OCT2020 09:12 | LY3819253 700mg IV           |
| 10061004 | 11804260942 | 38_60942_322851w_CD2.fastq.gz       | E819del | 4.545  | 44.0    | 1295.7097156398100 | 6.68 | NPH | 0.0 | 2 | 700 | 28OCT2020 14:45 | LY3819253 700mg IV           |
| 10061004 | 11804260942 | 38_60942_322851w_CD2.fastq.gz       | D820del | 3.03   | 33.0    | 1295.7097156398100 |      |     |     |   |     |                 |                              |

|          |             |                                |         |        |        |                    |      |     |     |   |     |                 |                              |
|----------|-------------|--------------------------------|---------|--------|--------|--------------------|------|-----|-----|---|-----|-----------------|------------------------------|
| 10031020 | 11800069698 | 21_69698_322851w_CB9.fastq.gz  | D820del | 1.562  | 64.0   | 1489.5170789163700 | 7.13 | NPH | 0.0 | 2 | 700 | 27OCT2020 09:46 | LY3819253 700mg IV           |
| 10031020 | 11800069698 | 21_69698_322851w_CB9.fastq.gz  | L821del | 1.587  | 63.0   | 1489.5170789163700 | 7.13 | NPH | 0.0 | 2 | 700 | 27OCT2020 09:46 | LY3819253 700mg IV           |
| 10031020 | 11800069698 | 21_69698_322851w_CB9.fastq.gz  | L822del | 7.353  | 68.0   | 1489.5170789163700 | 7.13 | NPH | 0.0 | 2 | 700 | 27OCT2020 09:46 | LY3819253 700mg IV           |
| 10031020 | 11800069698 | 21_69698_322851w_CB9.fastq.gz  | F833V   | 1.064  | 94.0   | 1489.5170789163700 | 7.13 | NPH | 0.0 | 2 | 700 | 27OCT2020 09:46 | LY3819253 700mg IV           |
| 10031016 | 11802186383 | 16_86383_322851w_CB4.fastq.gz  | Q239K   | 7.048  | 1277.0 | 1404.0551470588200 | 2.89 | NPH | 0.0 | 2 | 700 | 21OCT2020 10:20 | Placebo for LY3819253 700 mg |
| 10031016 | 11802186383 | 16_86383_322851w_CB4.fastq.gz  | P579L   | 12.33  | 1176.0 | 1404.0551470588200 | 2.89 | NPH | 0.0 | 2 | 700 | 21OCT2020 10:20 | Placebo for LY3819253 700 mg |
| 10031016 | 11802186383 | 16_86383_322851w_CB4.fastq.gz  | Q779_   | 15.299 | 451.0  | 1404.0551470588200 | 2.89 | NPH | 0.0 | 2 | 700 | 21OCT2020 10:20 | Placebo for LY3819253 700 mg |
| 10031015 | 11802184581 | 17_84581_322851w_CB5.fastq.gz  | E819del | 5.882  | 68.0   | 1197.663990825690  | 8.45 | NPH | 0.0 | 2 | 700 | 20OCT2020 10:33 | LY3819253 700mg IV           |
| 10031015 | 11802184581 | 17_84581_322851w_CB5.fastq.gz  | D820del | 4.688  | 64.0   | 1197.663990825690  | 8.45 | NPH | 0.0 | 2 | 700 | 20OCT2020 10:33 | LY3819253 700mg IV           |
| 10031015 | 11802184581 | 17_84581_322851w_CB5.fastq.gz  | L821del | 3.125  | 64.0   | 1197.663990825690  | 8.45 | NPH | 0.0 | 2 | 700 | 20OCT2020 10:33 | LY3819253 700mg IV           |
| 10031015 | 11802184581 | 17_84581_322851w_CB5.fastq.gz  | L822del | 3.077  | 65.0   | 1197.663990825690  | 8.45 | NPH | 0.0 | 2 | 700 | 20OCT2020 10:33 | LY3819253 700mg IV           |
| 10031015 | 11802184581 | 17_84581_322851w_CB5.fastq.gz  | F833S   | 1.587  | 63.0   | 1197.663990825690  | 8.45 | NPH | 0.0 | 2 | 700 | 20OCT2020 10:33 | LY3819253 700mg IV           |
| 10091003 | 11802103554 | 34_03554_322851w_CC10.fastq.gz | K814del | 1.235  | 81.0   | 1706.0745562130200 | 6.02 | NPH | 0.0 | 2 | 700 | 30OCT2020 10:45 | Placebo for LY3819253 700 mg |
| 10091003 | 11802103554 | 34_03554_322851w_CC10.fastq.gz | R815del | 1.25   | 80.0   | 1706.0745562130200 | 6.02 | NPH | 0.0 | 2 | 700 | 30OCT2020 10:45 | Placebo for LY3819253 700 mg |
| 10091003 | 11802103554 | 34_03554_322851w_CC10.fastq.gz | S816del | 1.25   | 80.0   | 1706.0745562130200 | 6.02 | NPH | 0.0 | 2 | 700 | 30OCT2020 10:45 | Placebo for LY3819253 700 mg |
| 10091003 | 11802103554 | 34_03554_322851w_CC10.fastq.gz | F817del | 1.266  | 79.0   | 1706.0745562130200 | 6.02 | NPH | 0.0 | 2 | 700 | 30OCT2020 10:45 | Placebo for LY3819253 700 mg |
| 10091003 | 11802103554 | 34_03554_322851w_CC10.fastq.gz | F817L   | 1.266  | 79.0   | 1706.0745562130200 | 6.02 | NPH | 0.0 | 2 | 700 | 30OCT2020 10:45 | Placebo for LY3819253 700 mg |
| 10091003 | 11802103554 | 34_03554_322851w_CC10.fastq.gz | I818del | 1.299  | 77.0   | 1706.0745562130200 | 6.02 | NPH | 0.0 | 2 | 700 | 30OCT2020 10:45 | Placebo for LY3819253 700 mg |
| 10081004 | 11804198656 | 29_98656_322851w_CC5.fastq.gz  | K814T   | 1.136  | 88.0   | 1371.7488151658800 | 6.36 | NPH | 0.0 | 2 | 700 | 19OCT2020 08:07 | LY3819253 700mg IV           |
| 10081004 | 11804198656 | 29_98656_322851w_CC5.fastq.gz  | F817L   | 1.136  | 88.0   | 1371.7488151658800 | 6.36 | NPH | 0.0 | 2 | 700 | 19OCT2020 08:07 | LY3819253 700mg IV           |
| 10051006 | 11835723342 | 44_23342_322851w_CD8.fastq.gz  | L822del | 10.0   | 10.0   | 1374.0719656283600 | 7.0  | NPH | 0.0 | 2 | 700 | 28OCT2020 09:40 | LY3819253 700mg IV           |
| 10051006 | 11835723342 | 44_23342_322851w_CD8.fastq.gz  | L828R   | 9.091  | 11.0   | 1374.0719656283600 | 7.0  | NPH | 0.0 | 2 | 700 | 28OCT2020 09:40 | LY3819253 700mg IV           |
| 10051006 | 11835723342 | 44_23342_322851w_CD8.fastq.gz  | D839A   | 3.704  | 27.0   | 1374.0719656283600 | 7.0  | NPH | 0.0 | 2 | 700 | 28OCT2020 09:40 | LY3819253 700mg IV           |
| 10031017 | 11802186381 | 25_86381_322851w_CC1.fastq.gz  | L276I   | 1.181  | 1101.0 | 1135.3478260869600 | 5.4  | NPH | 0.0 | 2 | 700 | 22OCT2020 10:42 | Placebo for LY3819253 700 mg |
| 10031017 | 11802186381 | 25_86381_322851w_CC1.fastq.gz  | K814del | 4.762  | 21.0   | 1135.3478260869600 | 5.4  | NPH | 0.0 | 2 | 700 | 22OCT2020 10:42 | Placebo for LY3819253 700 mg |
| 10031017 | 11802186381 | 25_86381_322851w_CC1.fastq.gz  | R815del | 5.0    | 20.0   | 1135.3478260869600 | 5.4  | NPH | 0.0 | 2 | 700 | 22OCT2020 10:42 | Placebo for LY3819253 700 mg |
| 10031017 | 11802186381 | 25_86381_322851w_CC1.fastq.gz  | S816del | 4.762  | 21.0   | 1135.3478260869600 | 5.4  | NPH | 0.0 | 2 | 700 | 22OCT2020 10:42 | Placebo for LY3819253 700 mg |
| 10031017 | 11802186381 | 25_86381_322851w_CC1.fastq.gz  | F817Y   | 4.762  | 21.0   | 1135.3478260869600 | 5.4  | NPH | 0.0 | 2 | 700 | 22OCT2020 10:42 | Placebo for LY3819253 700 mg |
| 10031017 | 11802186381 | 25_86381_322851w_CC1.fastq.gz  | F817del | 4.762  | 21.0   | 1135.3478260869600 | 5.4  | NPH | 0.0 | 2 | 700 | 22OCT2020 10:42 | Placebo for LY3819253 700 mg |
| 10031017 | 11802186381 | 25_86381_322851w_CC1.fastq.gz  | I818del | 5.0    | 20.0   | 1135.3478260869600 | 5.4  | NPH | 0.0 | 2 | 700 | 22OCT2020 10:42 | Placebo for LY3819253 700 mg |
| 10041005 | 11802104079 | 5_04079_322847w_BA5.fastq.gz   | F43Y    | 1.791  | 4131.0 | 2004.1781946072700 | 6.73 | NPH | 0.0 | 2 | 700 | 30OCT2020 11:00 | Placebo for LY3819253 700 mg |
| 10041005 | 11802104079 | 5_04079_322847w_BA5.fastq.gz   | F43S    | 1.283  | 4131.0 | 2004.1781946072700 | 6.73 | NPH | 0.0 | 2 | 700 | 30OCT2020 11:00 | Placebo for LY3819253 700 mg |
| 10041005 | 11802104079 | 5_04079_322847w_BA5.fastq.gz   | K814del | 1.053  | 190.0  | 2004.1781946072700 | 6.73 | NPH | 0.0 | 2 | 700 | 30OCT2020 11:00 | Placebo for LY3819253 700 mg |
| 10041005 | 11802104079 | 5_04079_322847w_BA5.fastq.gz   | R815del | 1.047  | 191.0  | 2004.1781946072700 | 6.73 | NPH | 0.0 | 2 | 700 | 30OCT2020 11:00 | Placebo for LY3819253 700 mg |
| 10041005 | 11802104079 | 5_04079_322847w_BA5.fastq.gz   | S816del | 1.015  | 197.0  | 2004.1781946072700 | 6.73 | NPH | 0.0 | 2 | 700 | 30OCT2020 11:00 | Placebo for LY3819253 700 mg |
| 10041005 | 11802104079 | 5_04079_322847w_BA5.fastq.gz   | F817del | 2.525  | 198.0  | 2004.1781946072700 | 6.73 | NPH | 0.0 | 2 | 700 | 30OCT2020 11:00 | Placebo for LY3819253 700 mg |
| 10041005 | 11802104079 | 5_04079_322847w_BA5.fastq.gz   | I818del | 2.632  | 190.0  | 2004.1781946072700 | 6.73 | NPH | 0.0 | 2 | 700 | 30OCT2020 11:00 | Placebo for LY3819253 700 mg |
| 10041005 | 11802104079 | 5_04079_322847w_BA5.fastq.gz   | D820del | 13.636 | 22.0   | 2004.1781946072700 | 6.73 | NPH | 0.0 | 2 | 700 | 30OCT2020 11:00 | Placebo for LY3819253 700 mg |
| 10041005 | 11802104079 | 5_04079_322847w_BA5.fastq.gz   | L821del | 15.0   | 20.0   | 2004.1781946072700 | 6.73 | NPH | 0.0 | 2 | 700 | 30OCT2020 11:00 | Placebo for LY3819253 700 mg |
| 10041005 | 11802104079 | 5_04079_322847w_BA5.fastq.gz   | L822del | 19.048 | 21.0   | 2004.1781946072700 | 6.73 | NPH | 0.0 | 2 | 700 | 30OCT2020 11:00 | Placebo for LY3819253 700 mg |
| 10041005 | 11802104079 | 5_04079_322847w_BA5.fastq.gz   | A831V   | 3.704  | 27.0   | 2004.1781946072700 | 6.73 | NPH | 0.0 | 2 | 700 | 30OCT2020 11:00 | Placebo for LY3819253 700 mg |
| 10041006 | 11802101766 | 38_01766_322847w_BD2.fastq.gz  | T547I   | 1.297  | 1619.0 | 1518.485172004750  | 6.41 | NPH | 0.0 | 2 | 700 | 12NOV2020 10:20 | LY3819253 700mg IV           |
| 10041006 | 11802101766 | 38_01766_322847w_BD2.fastq.gz  | K814N   | 2.703  | 37.0   | 1518.485172004750  | 6.41 | NPH | 0.0 | 2 | 700 | 12NOV2020 10:20 | LY3819253 700mg IV           |
| 10021008 | 11833623555 | 47_23555_322847w_BD11.fastq.gz | F43S    | 2.307  | 5894.0 | 2003.845444059980  | 7.27 | NPH | 0.0 | 2 | 700 | 12NOV2020 09:23 | LY3819253 700mg IV           |
| 10021008 | 11833623555 | 47_23555_322847w_BD11.fastq.gz | F43T    | 1.391  | 5894.0 | 2003.845444059980  | 7.27 | NPH | 0.0 | 2 | 700 | 12NOV2020 09:23 | LY3819253 700mg IV           |
| 10011022 | 11816795211 | 20_95211_322847w_BB8.fastq.gz  | I818del | 1.724  | 58.0   | 2152.1597633136100 | 6.02 | NPH | 0.0 | 2 | 700 | 10NOV2020 09:37 | Placebo for LY3819253 700 mg |
| 10031022 | 11816807239 | 16_07239_322847w_BB4.fastq.gz  | L18R    | 1.992  | 5322.0 | 1545.8681672025700 | 7.96 | NPH | 0.0 | 2 | 700 | 04NOV2020 11:48 | Placebo for LY3819253 700 mg |
| 10031022 | 11816807239 | 16_07239_322847w_BB4.fastq.gz  | F43S    | 1.138  | 3514.0 | 1545.8681672025700 | 7.96 | NPH | 0.0 | 2 | 700 | 04NOV2020 11:48 | Placebo for LY3819253 700 mg |
| 10031022 | 11816807239 | 16_07239_322847w_BB4.fastq.gz  | I818del | 1.261  | 238.0  | 1545.8681672025700 | 7.96 | NPH | 0.0 | 2 | 700 | 04NOV2020 11:48 | Placebo for LY3819253 700 mg |
| 10031022 | 11816807239 | 16_07239_322847w_BB4.fastq.gz  | E819del | 6.667  | 45.0   | 1545.8681672025700 | 7.96 | NPH | 0.0 | 2 | 700 | 04NOV2020 11:48 | Placebo for LY3819253 700 mg |
| 10031022 | 11816807239 | 16_07239_322847w_BB4.fastq.gz  | D820del | 6.818  | 44.0   | 1545.8681672025700 | 7.96 | NPH | 0.0 | 2 | 700 | 04NOV2020 11:48 | Placebo for LY3819253 700 mg |
| 10031022 | 11816807239 | 16_07239_322847w_BB4.fastq.gz  | L821del | 4.651  | 43.0   | 1545.8681672025700 | 7.96 | NPH | 0.0 | 2 | 700 | 04NOV2020 11:48 | Placebo for LY3819253 700 mg |
| 10031022 | 11816807239 | 16_07239_322847w_BB4.fastq.gz  | L822del | 2.222  | 45.0   | 1545.8681672025700 | 7.96 | NPH | 0.0 | 2 | 700 | 04NOV2020 11:48 | Placebo for LY3819253 700 mg |
| 10031022 | 11816807239 | 16_07239_322847w_BB4.fastq.gz  | V826E   | 2.381  | 42.0   | 1545.8681672025700 | 7.96 | NPH | 0.0 | 2 | 700 | 04NOV2020 11:48 | Placebo for LY3819253 700 mg |
| 10011017 | 11818948164 | 75_48164_322847w_BG3.fastq.gz  | K113E   | 1.231  | 1462.0 | 1538.2689486552600 | 3.75 | NPH | 0.0 | 2 | 700 | 03NOV2020 09:35 | LY3819253 700mg IV           |
| 10011017 | 11818948164 | 75_48164_322847w_BG3.fastq.gz  | I203K   | 1.189  | 1430.0 | 1538.2689486552600 | 3.75 | NPH | 0.0 | 2 | 700 | 03NOV2020 09:35 | LY3819253 700mg IV           |
| 10011017 | 11818948164 | 75_48164_322847w_BG3.fastq.gz  | L387_   | 1.475  | 1492.0 | 1538.2689486552600 | 3.75 | NPH | 0.0 | 2 | 700 | 03NOV2020 09:35 | LY3819253 700mg IV           |
| 10011017 | 11818948164 | 75_48164_322847w_BG3.fastq.gz  | S443F   | 1.663  | 1443.0 | 1538.2689486552600 | 3.75 | NPH | 0.0 | 2 | 700 | 03NOV2020 09:35 | LY3819253 700mg IV           |
| 10011017 | 11818948164 | 75_48164_322847w_BG3.fastq.gz  | P507L   | 1.156  | 1471.0 | 1538.2689486552600 | 3.75 | NPH | 0.0 | 2 | 700 | 03NOV2020 09:35 | LY3819253 700mg IV           |
| 10011017 | 11818948164 | 75_48164_322847w_BG3.fastq.gz  | S686G   | 1.011  | 989.0  | 1538.2689486552600 | 3.75 | NPH | 0.0 | 2 | 700 | 03NOV2020 09:35 | LY3819253 700mg IV           |
| 10021007 | 11833557059 | 46_57059_322847w_BD10.fastq.gz | T761I   | 1.54   | 779.0  | 2047.6315789473700 | 7.76 | NPH | 0.0 | 2 | 700 | 04NOV2020 08:58 | LY3819253 700mg IV           |
| 10021007 | 11833557059 | 46_57059_322847w_BD10.fastq.gz | E819del | 2.899  | 69.0   | 2047.6315789473700 | 7.76 | NPH | 0.0 | 2 | 700 | 04NOV2020 08:58 | LY3819253 700mg IV           |
| 10021007 | 11833557059 | 46_57059_322847w_BD10.fastq.gz | D820del | 3.03   | 66.0   | 2047.6315789473700 | 7.76 | NPH | 0.0 | 2 | 700 | 04NOV2020 08:58 | LY3819253 700mg IV           |
| 10021007 | 11833557059 | 46_57059_322847w_BD10.fastq.gz | L821del | 1.538  | 65.0   | 2047.6315789473700 | 7.76 | NPH | 0.0 | 2 | 700 | 04NOV2020 08:58 | LY3819253 700mg IV           |
| 10021007 | 11833557059 | 46_57059_322847w_BD10.fastq.gz | L822F   | 1.538  | 65.0   | 2047.6315789473700 | 7.76 | NPH | 0.0 | 2 | 700 | 04NOV2020 08:58 | LY3819253 700mg IV           |
| 10021007 | 11833557059 | 46_57059_322847w_BD10.fastq.gz | L822P   | 1.538  | 65.0   | 2047.6315789473700 | 7.76 | NPH | 0.0 | 2 | 700 | 04NOV2020 08:58 | LY3819253 700mg IV           |
| 10021007 | 11833557059 | 46_57059_                      |         |        |        |                    |      |     |     |   |     |                 |                              |

|          |             |                                     |         |        |        |                    |      |     |     |   |     |                 |                              |
|----------|-------------|-------------------------------------|---------|--------|--------|--------------------|------|-----|-----|---|-----|-----------------|------------------------------|
| 10041004 | 11802102799 | 6_02799_322847w_BA6.fastq.gz        | I818del | 1.072  | 373.0  | 2225.748590755360  | 7.62 | NPH | 0.0 | 2 | 700 | 30OCT2020 12:20 | LY3819253 700mg IV           |
| 10041004 | 11802102799 | 6_02799_322847w_BA6.fastq.gz        | E819del | 7.407  | 54.0   | 2225.748590755360  | 7.62 | NPH | 0.0 | 2 | 700 | 30OCT2020 12:20 | LY3819253 700mg IV           |
| 10041004 | 11802102799 | 6_02799_322847w_BA6.fastq.gz        | E819_   | 1.852  | 54.0   | 2225.748590755360  | 7.62 | NPH | 0.0 | 2 | 700 | 30OCT2020 12:20 | LY3819253 700mg IV           |
| 10041004 | 11802102799 | 6_02799_322847w_BA6.fastq.gz        | D820del | 2.0    | 50.0   | 2225.748590755360  | 7.62 | NPH | 0.0 | 2 | 700 | 30OCT2020 12:20 | LY3819253 700mg IV           |
| 10041004 | 11802102799 | 6_02799_322847w_BA6.fastq.gz        | L821del | 1.961  | 51.0   | 2225.748590755360  | 7.62 | NPH | 0.0 | 2 | 700 | 30OCT2020 12:20 | LY3819253 700mg IV           |
| 10041004 | 11802102799 | 6_02799_322847w_BA6.fastq.gz        | L822del | 7.143  | 56.0   | 2225.748590755360  | 7.62 | NPH | 0.0 | 2 | 700 | 30OCT2020 12:20 | LY3819253 700mg IV           |
| 10041004 | 11802102799 | 6_02799_322847w_BA6.fastq.gz        | I834N   | 1.538  | 65.0   | 2225.748590755360  | 7.62 | NPH | 0.0 | 2 | 700 | 30OCT2020 12:20 | LY3819253 700mg IV           |
| 10041004 | 11802102799 | 6_02799_322847w_BA6.fastq.gz        | Q836R   | 1.538  | 65.0   | 2225.748590755360  | 7.62 | NPH | 0.0 | 2 | 700 | 30OCT2020 12:20 | LY3819253 700mg IV           |
| 10081009 | 11821057995 | 24_57995_322847w_BB12.fastq.gz      | E819del | 12.5   | 8.0    | 2712.308875739650  | 6.27 | NPH | 0.0 | 2 | 700 | 13NOV2020 12:00 | LY3819253 700mg IV           |
| 10081009 | 11821057995 | 24_57995_322847w_BB12.fastq.gz      | D820del | 20.0   | 5.0    | 2712.308875739650  | 6.27 | NPH | 0.0 | 2 | 700 | 13NOV2020 12:00 | LY3819253 700mg IV           |
| 10081009 | 11821057995 | 24_57995_322847w_BB12.fastq.gz      | L821del | 20.0   | 5.0    | 2712.308875739650  | 6.27 | NPH | 0.0 | 2 | 700 | 13NOV2020 12:00 | LY3819253 700mg IV           |
| 10081009 | 11821057995 | 24_57995_322847w_BB12.fastq.gz      | L822del | 20.0   | 5.0    | 2712.308875739650  | 6.27 | NPH | 0.0 | 2 | 700 | 13NOV2020 12:00 | LY3819253 700mg IV           |
| 10041008 | 11802104838 | 43_04838_322847w_BD7.fastq.gz       | Q836_   | 3.03   | 33.0   | 1942.2173396674600 | 6.91 | NPH | 0.0 | 2 | 700 | 15NOV2020 08:10 | Placebo for LY3819253 700 mg |
| 10031023 | 11821053889 | 14_53889_322847w_BB2.fastq.gz       | H49Y    | 10.819 | 3198.0 | 1738.5130331753600 | 4.29 | NPH | 0.0 | 2 | 700 | 05NOV2020 11:12 | LY3819253 700mg IV           |
| 10031023 | 11821053889 | 14_53889_322847w_BB2.fastq.gz       | S640F   | 5.857  | 1417.0 | 1738.5130331753600 | 4.29 | NPH | 0.0 | 2 | 700 | 05NOV2020 11:12 | LY3819253 700mg IV           |
| 10031023 | 11821053889 | 14_53889_322847w_BB2.fastq.gz       | A688V   | 3.384  | 1182.0 | 1738.5130331753600 | 4.29 | NPH | 0.0 | 2 | 700 | 05NOV2020 11:12 | LY3819253 700mg IV           |
| 10081010 | 11820992712 | 29_92712_322847w_BC5.fastq.gz       | V642G   | 3.805  | 1393.0 | 1798.7045720984800 | 7.4  | NAS | 0.0 | 2 | 700 | 14NOV2020 10:45 | LY3819253 700mg IV           |
| 10081010 | 11820992712 | 29_92712_322847w_BC5.fastq.gz       | E819del | 4.301  | 93.0   | 1798.7045720984800 | 7.4  | NAS | 0.0 | 2 | 700 | 14NOV2020 10:45 | LY3819253 700mg IV           |
| 10081010 | 11820992712 | 29_92712_322847w_BC5.fastq.gz       | E819L   | 1.075  | 93.0   | 1798.7045720984800 | 7.4  | NAS | 0.0 | 2 | 700 | 14NOV2020 10:45 | LY3819253 700mg IV           |
| 10081010 | 11820992712 | 29_92712_322847w_BC5.fastq.gz       | D820del | 3.371  | 89.0   | 1798.7045720984800 | 7.4  | NAS | 0.0 | 2 | 700 | 14NOV2020 10:45 | LY3819253 700mg IV           |
| 10081010 | 11820992712 | 29_92712_322847w_BC5.fastq.gz       | L821del | 3.261  | 92.0   | 1798.7045720984800 | 7.4  | NAS | 0.0 | 2 | 700 | 14NOV2020 10:45 | LY3819253 700mg IV           |
| 10081010 | 11820992712 | 29_92712_322847w_BC5.fastq.gz       | L822del | 3.261  | 92.0   | 1798.7045720984800 | 7.4  | NAS | 0.0 | 2 | 700 | 14NOV2020 10:45 | LY3819253 700mg IV           |
| 10081010 | 11820992712 | 29_92712_322847w_BC5.fastq.gz       | F823S   | 1.053  | 95.0   | 1798.7045720984800 | 7.4  | NAS | 0.0 | 2 | 700 | 14NOV2020 10:45 | LY3819253 700mg IV           |
| 10081010 | 11820992712 | 29_92712_322847w_BC5.fastq.gz       | N824I   | 1.053  | 95.0   | 1798.7045720984800 | 7.4  | NAS | 0.0 | 2 | 700 | 14NOV2020 10:45 | LY3819253 700mg IV           |
| 10081010 | 11820992712 | 29_92712_322847w_BC5.fastq.gz       | K825N   | 1.053  | 95.0   | 1798.7045720984800 | 7.4  | NAS | 0.0 | 2 | 700 | 14NOV2020 10:45 | LY3819253 700mg IV           |
| 10081010 | 11820992712 | 29_92712_322847w_BC5.fastq.gz       | V826A   | 2.247  | 89.0   | 1798.7045720984800 | 7.4  | NAS | 0.0 | 2 | 700 | 14NOV2020 10:45 | LY3819253 700mg IV           |
| 10031024 | 11812670017 | 12_70017_322847w_BA12.fastq.gz      | S813R   | 1.19   | 84.0   | 2458.9963985594200 | 5.79 | NPH | 0.0 | 2 | 700 | 10NOV2020 10:21 | Placebo for LY3819253 700 mg |
| 10011023 | 11818885197 | 23_85197_322847w_BB11.fastq.gz      | F43S    | 1.957  | 5518.0 | 1775.6171617161700 | 7.41 | NAS | 0.0 | 2 | 700 | 13NOV2020 11:02 | Placebo for LY3819253 700 mg |
| 10011023 | 11818885197 | 23_85197_322847w_BB11.fastq.gz      | A783T   | 1.319  | 2957.0 | 1775.6171617161700 | 7.41 | NAS | 0.0 | 2 | 700 | 13NOV2020 11:02 | Placebo for LY3819253 700 mg |
| 10011023 | 11818885197 | 23_85197_322847w_BB11.fastq.gz      | E819del | 1.274  | 157.0  | 1775.6171617161700 | 7.41 | NAS | 0.0 | 2 | 700 | 13NOV2020 11:02 | Placebo for LY3819253 700 mg |
| 10011023 | 11818885197 | 23_85197_322847w_BB11.fastq.gz      | D820del | 1.282  | 156.0  | 1775.6171617161700 | 7.41 | NAS | 0.0 | 2 | 700 | 13NOV2020 11:02 | Placebo for LY3819253 700 mg |
| 10011023 | 11818885197 | 23_85197_322847w_BB11.fastq.gz      | L821del | 1.242  | 161.0  | 1775.6171617161700 | 7.41 | NAS | 0.0 | 2 | 700 | 13NOV2020 11:02 | Placebo for LY3819253 700 mg |
| 10011023 | 11818885197 | 23_85197_322847w_BB11.fastq.gz      | L822del | 1.852  | 162.0  | 1775.6171617161700 | 7.41 | NAS | 0.0 | 2 | 700 | 13NOV2020 11:02 | Placebo for LY3819253 700 mg |
| 10011021 | 11816795209 | 18_95209_322847w_BB6.fastq.gz       | Y279N   | 1.149  | 1914.0 | 2090.345498783460  | 4.38 | NPH | 0.0 | 2 | 700 | 09NOV2020 09:33 | Placebo for LY3819253 700 mg |
| 10011021 | 11816795209 | 18_95209_322847w_BB6.fastq.gz       | R646C   | 1.234  | 1459.0 | 2090.345498783460  | 4.38 | NPH | 0.0 | 2 | 700 | 09NOV2020 09:33 | Placebo for LY3819253 700 mg |
| 10051009 | 11835724613 | 42_24613_322847w_BD6.fastq.gz       | F43S    | 1.56   | 3654.0 | 1819.2590431738600 | 7.6  | NPH | 0.0 | 2 | 700 | 13NOV2020 11:38 | LY3819253 700mg IV           |
| 10051009 | 11835724613 | 42_24613_322847w_BD6.fastq.gz       | E819del | 1.515  | 66.0   | 1819.2590431738600 | 7.6  | NPH | 0.0 | 2 | 700 | 13NOV2020 11:38 | LY3819253 700mg IV           |
| 10051009 | 11835724613 | 42_24613_322847w_BD6.fastq.gz       | D820del | 1.562  | 64.0   | 1819.2590431738600 | 7.6  | NPH | 0.0 | 2 | 700 | 13NOV2020 11:38 | LY3819253 700mg IV           |
| 10051009 | 11835724613 | 42_24613_322847w_BD6.fastq.gz       | D820A   | 1.562  | 64.0   | 1819.2590431738600 | 7.6  | NPH | 0.0 | 2 | 700 | 13NOV2020 11:38 | LY3819253 700mg IV           |
| 10051009 | 11835724613 | 42_24613_322847w_BD6.fastq.gz       | L821del | 1.587  | 63.0   | 1819.2590431738600 | 7.6  | NPH | 0.0 | 2 | 700 | 13NOV2020 11:38 | LY3819253 700mg IV           |
| 10051009 | 11835724613 | 42_24613_322847w_BD6.fastq.gz       | L822P   | 1.562  | 64.0   | 1819.2590431738600 | 7.6  | NPH | 0.0 | 2 | 700 | 13NOV2020 11:38 | LY3819253 700mg IV           |
| 10051009 | 11835724613 | 42_24613_322847w_BD6.fastq.gz       | V826A   | 1.515  | 66.0   | 1819.2590431738600 | 7.6  | NPH | 0.0 | 2 | 700 | 13NOV2020 11:38 | LY3819253 700mg IV           |
| 10081006 | 11804199689 | 26_99689_322847w_BC2.fastq.gz       | L822del | 2.083  | 48.0   | 1512.2342342342300 | 7.98 | NPH | 0.0 | 2 | 700 | 29OCT2020 11:57 | LY3819253 700mg IV           |
| 10081006 | 11804199689 | 26_99689_322847w_BC2.fastq.gz       | A831T   | 1.754  | 57.0   | 1512.2342342342300 | 7.98 | NPH | 0.0 | 2 | 700 | 29OCT2020 11:57 | LY3819253 700mg IV           |
| 10081006 | 11804199689 | 26_99689_322847w_BC2.fastq.gz       | K835I   | 1.786  | 56.0   | 1512.2342342342300 | 7.98 | NPH | 0.0 | 2 | 700 | 29OCT2020 11:57 | LY3819253 700mg IV           |
| 10081006 | 11804199689 | 26_99689_322847w_BC2.fastq.gz       | Y837D   | 1.786  | 56.0   | 1512.2342342342300 | 7.98 | NPH | 0.0 | 2 | 700 | 29OCT2020 11:57 | LY3819253 700mg IV           |
| 10061007 | 11804197709 | 32_97709_322847w_BC8.fastq.gz       | F43T    | 2.673  | 4713.0 | 2154.493227990970  | 6.73 | NPH | 0.0 | 2 | 700 | 09NOV2020 10:56 | Placebo for LY3819253 700 mg |
| 10061008 | 11804195150 | 33_95150_322847w_BC9.fastq.gz       | K814del | 2.151  | 93.0   | 3097.2673733804500 | 6.17 | NPH | 0.0 | 2 | 700 | 10NOV2020 10:35 | LY3819253 700mg IV           |
| 10061008 | 11804195150 | 33_95150_322847w_BC9.fastq.gz       | R815del | 2.105  | 95.0   | 3097.2673733804500 | 6.17 | NPH | 0.0 | 2 | 700 | 10NOV2020 10:35 | LY3819253 700mg IV           |
| 10061008 | 11804195150 | 33_95150_322847w_BC9.fastq.gz       | S816del | 2.105  | 95.0   | 3097.2673733804500 | 6.17 | NPH | 0.0 | 2 | 700 | 10NOV2020 10:35 | LY3819253 700mg IV           |
| 10061008 | 11804195150 | 33_95150_322847w_BC9.fastq.gz       | F817del | 2.105  | 95.0   | 3097.2673733804500 | 6.17 | NPH | 0.0 | 2 | 700 | 10NOV2020 10:35 | LY3819253 700mg IV           |
| 10061008 | 11804195150 | 33_95150_322847w_BC9.fastq.gz       | F817S   | 1.053  | 95.0   | 3097.2673733804500 | 6.17 | NPH | 0.0 | 2 | 700 | 10NOV2020 10:35 | LY3819253 700mg IV           |
| 10061008 | 11804195150 | 33_95150_322847w_BC9.fastq.gz       | I818del | 2.174  | 92.0   | 3097.2673733804500 | 6.17 | NPH | 0.0 | 2 | 700 | 10NOV2020 10:35 | LY3819253 700mg IV           |
| 10051008 | 11835722574 | 79_22574_322847w_BG7.fastq.gz       | E819del | 4.762  | 42.0   | 1477.7827956989200 | 7.87 | NPH | 0.0 | 2 | 700 | 06NOV2020 09:55 | Placebo for LY3819253 700 mg |
| 10051008 | 11835722574 | 79_22574_322847w_BG7.fastq.gz       | D820del | 5.0    | 40.0   | 1477.7827956989200 | 7.87 | NPH | 0.0 | 2 | 700 | 06NOV2020 09:55 | Placebo for LY3819253 700 mg |
| 10051008 | 11835722574 | 79_22574_322847w_BG7.fastq.gz       | L821del | 2.564  | 39.0   | 1477.7827956989200 | 7.87 | NPH | 0.0 | 2 | 700 | 06NOV2020 09:55 | Placebo for LY3819253 700 mg |
| 10051008 | 11835722574 | 79_22574_322847w_BG7.fastq.gz       | I834V   | 2.5    | 40.0   | 1477.7827956989200 | 7.87 | NPH | 0.0 | 2 | 700 | 06NOV2020 09:55 | Placebo for LY3819253 700 mg |
| 10051008 | 11835722574 | 79_22574_322847w_BG7.fastq.gz       | C840Y   | 2.778  | 36.0   | 1477.7827956989200 | 7.87 | NPH | 0.0 | 2 | 700 | 06NOV2020 09:55 | Placebo for LY3819253 700 mg |
| 10051008 | 11835722574 | 79_22574_322847w_BG7.fastq.gz       | R847S   | 20.0   | 5.0    | 1477.7827956989200 | 7.87 | NPH | 0.0 | 2 | 700 | 06NOV2020 09:55 | Placebo for LY3819253 700 mg |
| 10041003 | 11802104332 | 4_04332_322847w_BA4.fastq.gz        | E819del | 1.471  | 204.0  | 2056.458432304040  | 7.62 | NPH | 0.0 | 2 | 700 | 28OCT2020 12:30 | LY3819253 700mg IV           |
| 10121010 | 11804197441 | 1_11804197441_323283w_CC12.fastq.gz | K814M   | 1.695  | 59.0   | 1315.1245551601400 | 6.36 | NPH | 0.0 | 2 | 700 | 09NOV2020 08:40 | Placebo for LY3819253 700 mg |
| 10121010 | 11804197441 | 1_11804197441_323283w_CC12.fastq.gz | R815W   | 1.695  | 59.0   | 1315.1245551601400 | 6.36 | NPH | 0.0 | 2 | 700 | 09NOV2020 08:40 | Placebo for LY3819253 700 mg |
| 10161006 | 11818954316 | 5_11818954316_323283w_CD4.fastq.gz  | H146Q   | 1.198  | 1002.0 | 1269.7167277167300 | 3.52 | NPH | 0.0 | 2 | 700 | 06NOV2020 11:08 | LY3819253 700mg IV           |
| 10111002 | 11837817155 | F2_11837817155_324019w_CF2.fastq.gz | G545D   | 1.012  | 3459.0 | 2073.658506731950  | 4.13 | OPW | 0.0 | 2 | 700 | 02NOV2020 09:53 | LY3819253 700mg IV           |
| 10111002 | 11837817155 | F2_11837817155_324019w_CF2.fastq.gz | L546F   | 1.189  | 3447.0 | 2073.658506731950  | 4.13 | OPW | 0.0 | 2 | 700 | 02NOV2020 09:53 | LY3819253 700mg IV           |
| 10111002 | 11837817155 | F2_11837817155_324019w_CF2.fastq.gz | S686N   | 2.147  | 1910.0 | 2073.658506731950  | 4.13 | OPW | 0.0 | 2 | 700 | 02NOV2020 09:53 | LY3819253 700mg IV           |
| 10111002 | 11837817155 | F2_11837817155_324019w_CF2.fastq.gz | K786R   | 1      |        |                    |      |     |     |   |     |                 |                              |



|          |             |                                       |         |        |         |                    |      |     |     |   |     |                 |                              |
|----------|-------------|---------------------------------------|---------|--------|---------|--------------------|------|-----|-----|---|-----|-----------------|------------------------------|
| 10491001 | 11818971214 | 35_11818971214_323283w_CG9.fastq.gz   | A27V    | 8.301  | 3915.0  | 1268.2091428571400 | 6.93 | NPH | 0.0 | 2 | 700 | 28OCT2020 10:43 | Placebo for LY3819253 700 mg |
| 10491001 | 11818971214 | 35_11818971214_323283w_CG9.fastq.gz   | R567I   | 14.486 | 1215.0  | 1268.2091428571400 | 6.93 | NPH | 0.0 | 2 | 700 | 28OCT2020 10:43 | Placebo for LY3819253 700 mg |
| 10261027 | 11816806469 | 11_11816806469_323283w_CE9.fastq.gz   | T478K   | 4.305  | 604.0   | 628.3467643467640  | 4.92 | NPH | 0.0 | 2 | 700 | 26OCT2020 15:30 | LY3819253 700mg IV           |
| 10161005 | 11818954317 | 39_11818954317_323283w_CH1.fastq.gz   | Q762K   | 1.22   | 164.0   | 1000.1306413301700 | 6.83 | NPH | 0.0 | 2 | 700 | 30OCT2020 14:03 | Placebo for LY3819253 700 mg |
| 10201013 | 11818965508 | 23_11818965508_323283w_CF9.fastq.gz   | E725_   | 1.374  | 364.0   | 648.039072039072   | 3.82 | NPH | 0.0 | 2 | 700 | 29OCT2020 11:04 | LY3819253 700mg IV           |
| 10121007 | 11804194888 | 13_11804194888_323283w_CE11.fastq.gz  | H625Y   | 1.05   | 476.0   | 626.3034398034400  | 4.11 | NPH | 0.0 | 2 | 700 | 02NOV2020 11:16 | Placebo for LY3819253 700 mg |
| 10201011 | 11818900742 | E3_11818900742_323690w_BE3.fastq.gz   | F43T    | 8.003  | 2499.0  | 1539.7306358381500 | 7.99 | NAS | 0.0 | 2 | 700 | 27OCT2020 09:27 | Placebo for LY3819253 700 mg |
| 10201011 | 11818900742 | E3_11818900742_323690w_BE3.fastq.gz   | F782V   | 1.284  | 1480.0  | 1539.7306358381500 | 7.99 | NAS | 0.0 | 2 | 700 | 27OCT2020 09:27 | Placebo for LY3819253 700 mg |
| 10201008 | 11837838600 | D12_11837838600_323690w_BD12.fastq.gz | V772D   | 1.022  | 3426.0  | 2297.493902439020  | 7.29 | NAS | 0.0 | 2 | 700 | 20OCT2020 09:42 | LY3819253 700mg IV           |
| 10201008 | 11837838600 | D12_11837838600_323690w_BD12.fastq.gz | T791I   | 9.774  | 3407.0  | 2297.493902439020  | 7.29 | NAS | 0.0 | 2 | 700 | 20OCT2020 09:42 | LY3819253 700mg IV           |
| 10251008 | 11854527566 | E4_11854527566_323690w_BE4.fastq.gz   | A783V   | 1.094  | 1463.0  | 1699.7890243902400 | 6.76 | NAS | 0.0 | 2 | 700 | 26OCT2020 10:58 | LY3819253 700mg IV           |
| 10051009 | 11835724614 | C1_11835724614_323692w_NC1.fastq.gz   | P793S   | 6.275  | 5992.0  | 2280.0             | 5.89 | NAS | 0.0 | 2 | 700 | 13NOV2020 11:38 | LY3819253 700mg IV           |
| 10221006 | 11839867916 | A5_11839867916_323692w_NA5.fastq.gz   | S297L   | 1.839  | 2828.0  | 2710.7344701583400 | 5.06 | NAS | 0.0 | 2 | 700 | 27OCT2020 08:36 | LY3819253 700mg IV           |
| 10221006 | 11839867916 | A5_11839867916_323692w_NA5.fastq.gz   | K814N   | 2.439  | 41.0    | 2710.7344701583400 | 5.06 | NAS | 0.0 | 2 | 700 | 27OCT2020 08:36 | LY3819253 700mg IV           |
| 10261032 | 11812605519 | C12_11812605519_323692w_NC12.fastq.gz | L141del | 1.354  | 2363.0  | 2894.5830303030300 | 6.52 | NAS | 0.0 | 2 | 700 | 12NOV2020 13:08 | Placebo for LY3819253 700 mg |
| 10261032 | 11812605519 | C12_11812605519_323692w_NC12.fastq.gz | G142del | 1.505  | 2326.0  | 2894.5830303030300 | 6.52 | NAS | 0.0 | 2 | 700 | 12NOV2020 13:08 | Placebo for LY3819253 700 mg |
| 10261032 | 11812605519 | C12_11812605519_323692w_NC12.fastq.gz | V143del | 1.46   | 2260.0  | 2894.5830303030300 | 6.52 | NAS | 0.0 | 2 | 700 | 12NOV2020 13:08 | Placebo for LY3819253 700 mg |
| 10261032 | 11812605519 | C12_11812605519_323692w_NC12.fastq.gz | L241del | 6.305  | 2268.0  | 2894.5830303030300 | 6.52 | NAS | 0.0 | 2 | 700 | 12NOV2020 13:08 | Placebo for LY3819253 700 mg |
| 10261032 | 11812605519 | C12_11812605519_323692w_NC12.fastq.gz | L242del | 6.447  | 2218.0  | 2894.5830303030300 | 6.52 | NAS | 0.0 | 2 | 700 | 12NOV2020 13:08 | Placebo for LY3819253 700 mg |
| 10261032 | 11812605519 | C12_11812605519_323692w_NC12.fastq.gz | V772D   | 1.015  | 6798.0  | 2894.5830303030300 | 6.52 | NAS | 0.0 | 2 | 700 | 12NOV2020 13:08 | Placebo for LY3819253 700 mg |
| 10241006 | 11837829706 | 71_11837829706_323231w_NF11.fastq.gz  | F43T    | 14.318 | 8381.0  | 3975.1508515815100 | 6.42 | NPH | 0.0 | 2 | 700 | 13NOV2020 09:12 | LY3819253 700mg IV           |
| 10131007 | 11850420804 | 56_11850420804_323231w_NE8.fastq.gz   | W258L   | 3.049  | 3772.0  | 3447.829383886260  | 6.8  | NPH | 0.0 | 2 | 700 | 22OCT2020 09:39 | Placebo for LY3819253 700 mg |
| 10131009 | 11850418758 | 54_11850418758_323231w_NE6.fastq.gz   | T734A   | 1.183  | 676.0   | 1824.2491103202800 | 7.98 | NPH | 0.0 | 2 | 700 | 04NOV2020 10:38 | LY3819253 700mg IV           |
| 10241005 | 11837828169 | 73_11837828169_323231w_NG1.fastq.gz   | F43T    | 1.229  | 2685.0  | 1327.205186020290  | 7.79 | NPH | 0.0 | 2 | 700 | 12NOV2020 08:52 | Placebo for LY3819253 700 mg |
| 10241005 | 11837828169 | 73_11837828169_323231w_NG1.fastq.gz   | F43S    | 1.043  | 2685.0  | 1327.205186020290  | 7.79 | NPH | 0.0 | 2 | 700 | 12NOV2020 08:52 | Placebo for LY3819253 700 mg |
| 10171006 | 11833637378 | 75_11833637378_323231w_NG3.fastq.gz   | V3F     | 3.405  | 6814.0  | 1306.75            | 5.7  | NPH | 0.0 | 2 | 700 | 11NOV2020 11:17 | Placebo for LY3819253 700 mg |
| 10171006 | 11833637378 | 75_11833637378_323231w_NG3.fastq.gz   | S172F   | 1.259  | 874.0   | 1306.75            | 5.7  | NPH | 0.0 | 2 | 700 | 11NOV2020 11:17 | Placebo for LY3819253 700 mg |
| 10171006 | 11833637378 | 75_11833637378_323231w_NG3.fastq.gz   | N717I   | 6.773  | 2377.0  | 1306.75            | 5.7  | NPH | 0.0 | 2 | 700 | 11NOV2020 11:17 | Placebo for LY3819253 700 mg |
| 10311010 | 11854533057 | 8_11854533057_323231w_NA8.fastq.gz    | L5F     | 8.555  | 8147.0  | 3591.4065934065900 | 3.59 | NPH | 0.0 | 2 | 700 | 05NOV2020 08:21 | LY3819253 700mg IV           |
| 10131010 | 11812669000 | 51_11812669000_323231w_NE3.fastq.gz   | E819del | 7.692  | 13.0    | 1679.5360946745600 | 7.66 | NPH | 0.0 | 2 | 700 | 10NOV2020 09:02 | Placebo for LY3819253 700 mg |
| 10131010 | 11812669000 | 51_11812669000_323231w_NE3.fastq.gz   | D820del | 7.692  | 13.0    | 1679.5360946745600 | 7.66 | NPH | 0.0 | 2 | 700 | 10NOV2020 09:02 | Placebo for LY3819253 700 mg |
| 10131010 | 11812669000 | 51_11812669000_323231w_NE3.fastq.gz   | L821del | 7.692  | 13.0    | 1679.5360946745600 | 7.66 | NPH | 0.0 | 2 | 700 | 10NOV2020 09:02 | Placebo for LY3819253 700 mg |
| 10131010 | 11812669000 | 51_11812669000_323231w_NE3.fastq.gz   | L841I   | 7.143  | 14.0    | 1679.5360946745600 | 7.66 | NPH | 0.0 | 2 | 700 | 10NOV2020 09:02 | Placebo for LY3819253 700 mg |
| 10491002 | 11818970958 | 22_11818970958_323231w_NB10.fastq.gz  | F43S    | 2.08   | 10000.0 | 1276.8546824542500 | 8.44 | NAS | 0.0 | 2 | 700 | 30OCT2020 10:18 | Placebo for LY3819253 700 mg |
| 10491002 | 11818970958 | 22_11818970958_323231w_NB10.fastq.gz  | Y313H   | 5.096  | 157.0   | 1276.8546824542500 | 8.44 | NAS | 0.0 | 2 | 700 | 30OCT2020 10:18 | Placebo for LY3819253 700 mg |
| 10491002 | 11818970958 | 22_11818970958_323231w_NB10.fastq.gz  | K424I   | 1.181  | 254.0   | 1276.8546824542500 | 8.44 | NAS | 0.0 | 2 | 700 | 30OCT2020 10:18 | Placebo for LY3819253 700 mg |
| 10491002 | 11818970958 | 22_11818970958_323231w_NB10.fastq.gz  | K814del | 4.545  | 44.0    | 1276.8546824542500 | 8.44 | NAS | 0.0 | 2 | 700 | 30OCT2020 10:18 | Placebo for LY3819253 700 mg |
| 10491002 | 11818970958 | 22_11818970958_323231w_NB10.fastq.gz  | R815del | 4.545  | 44.0    | 1276.8546824542500 | 8.44 | NAS | 0.0 | 2 | 700 | 30OCT2020 10:18 | Placebo for LY3819253 700 mg |
| 10491002 | 11818970958 | 22_11818970958_323231w_NB10.fastq.gz  | S816del | 4.348  | 46.0    | 1276.8546824542500 | 8.44 | NAS | 0.0 | 2 | 700 | 30OCT2020 10:18 | Placebo for LY3819253 700 mg |
| 10491002 | 11818970958 | 22_11818970958_323231w_NB10.fastq.gz  | F817del | 4.348  | 46.0    | 1276.8546824542500 | 8.44 | NAS | 0.0 | 2 | 700 | 30OCT2020 10:18 | Placebo for LY3819253 700 mg |
| 10491002 | 11818970958 | 22_11818970958_323231w_NB10.fastq.gz  | I818del | 4.762  | 42.0    | 1276.8546824542500 | 8.44 | NAS | 0.0 | 2 | 700 | 30OCT2020 10:18 | Placebo for LY3819253 700 mg |
| 10491002 | 11818970958 | 22_11818970958_323231w_NB10.fastq.gz  | L822del | 15.385 | 13.0    | 1276.8546824542500 | 8.44 | NAS | 0.0 | 2 | 700 | 30OCT2020 10:18 | Placebo for LY3819253 700 mg |
| 10491002 | 11818970958 | 22_11818970958_323231w_NB10.fastq.gz  | I834V   | 5.556  | 18.0    | 1276.8546824542500 | 8.44 | NAS | 0.0 | 2 | 700 | 30OCT2020 10:18 | Placebo for LY3819253 700 mg |
| 10201019 | 11818889161 | 17_11818889161_323231w_NB5.fastq.gz   | F377L   | 1.111  | 1530.0  | 1614.8918918918900 | 3.12 | NPH | 0.0 | 2 | 700 | 06NOV2020 08:38 | LY3819253 700mg IV           |
| 10201021 | 11818888897 | 40_11818888897_323231w_ND4.fastq.gz   | F92L    | 1.575  | 1778.0  | 1335.5774818401900 | 3.49 | NPH | 0.0 | 2 | 700 | 13NOV2020 09:46 | Placebo for LY3819253 700 mg |
| 10201021 | 11818888897 | 40_11818888897_323231w_ND4.fastq.gz   | G181E   | 1.216  | 1151.0  | 1335.5774818401900 | 3.49 | NPH | 0.0 | 2 | 700 | 13NOV2020 09:46 | Placebo for LY3819253 700 mg |
| 10201021 | 11818888897 | 40_11818888897_323231w_ND4.fastq.gz   | G404V   | 1.593  | 1318.0  | 1335.5774818401900 | 3.49 | NPH | 0.0 | 2 | 700 | 13NOV2020 09:46 | Placebo for LY3819253 700 mg |
| 10201021 | 11818888897 | 40_11818888897_323231w_ND4.fastq.gz   | Y423H   | 1.733  | 1327.0  | 1335.5774818401900 | 3.49 | NPH | 0.0 | 2 | 700 | 13NOV2020 09:46 | Placebo for LY3819253 700 mg |
| 10201021 | 11818888897 | 40_11818888897_323231w_ND4.fastq.gz   | L441F   | 1.357  | 1179.0  | 1335.5774818401900 | 3.49 | NPH | 0.0 | 2 | 700 | 13NOV2020 09:46 | Placebo for LY3819253 700 mg |
| 10201021 | 11818888897 | 40_11818888897_323231w_ND4.fastq.gz   | L517P   | 1.046  | 1243.0  | 1335.5774818401900 | 3.49 | NPH | 0.0 | 2 | 700 | 13NOV2020 09:46 | Placebo for LY3819253 700 mg |
| 10201021 | 11818888897 | 40_11818888897_323231w_ND4.fastq.gz   | V705L   | 1.604  | 748.0   | 1335.5774818401900 | 3.49 | NPH | 0.0 | 2 | 700 | 13NOV2020 09:46 | Placebo for LY3819253 700 mg |
| 10131006 | 11835737921 | 60_11835737921_323231w_NE12.fastq.gz  | T604I   | 1.358  | 3830.0  | 4486.262515262520  | 5.35 | NPH | 0.0 | 2 | 700 | 19OCT2020 09:30 | Placebo for LY3819253 700 mg |
| 10151003 | 11800017153 | 23_11800017153_323231w_NB11.fastq.gz  | Y160H   | 1.051  | 2758.0  | 3206.8961352657000 | 4.01 | NPH | 0.0 | 2 | 700 | 03NOV2020 10:03 | LY3819253 700mg IV           |
| 10151003 | 11800017153 | 23_11800017153_323231w_NB11.fastq.gz  | P217L   | 1.126  | 2841.0  | 3206.8961352657000 | 4.01 | NPH | 0.0 | 2 | 700 | 03NOV2020 10:03 | LY3819253 700mg IV           |
| 10151003 | 11800017153 | 23_11800017153_323231w_NB11.fastq.gz  | L390P   | 1.393  | 3016.0  | 3206.8961352657000 | 4.01 | NPH | 0.0 | 2 | 700 | 03NOV2020 10:03 | LY3819253 700mg IV           |
| 10151003 | 11800017153 | 23_11800017153_323231w_NB11.fastq.gz  | L390F   | 1.061  | 3016.0  | 3206.8961352657000 | 4.01 | NPH | 0.0 | 2 | 700 | 03NOV2020 10:03 | LY3819253 700mg IV           |
| 10151003 | 11800017153 | 23_11800017153_323231w_NB11.fastq.gz  | G404D   | 1.251  | 3037.0  | 3206.8961352657000 | 4.01 | NPH | 0.0 | 2 | 700 | 03NOV2020 10:03 | LY3819253 700mg IV           |
| 10151003 | 11800017153 | 23_11800017153_323231w_NB11.fastq.gz  | G404S   | 1.251  | 3037.0  | 3206.8961352657000 | 4.01 | NPH | 0.0 | 2 | 700 | 03NOV2020 10:03 | LY3819253 700mg IV           |
| 10151003 | 11800017153 | 23_11800017153_323231w_NB11.fastq.gz  | Q493_   | 1.198  | 3004.0  | 3206.8961352657000 | 4.01 | NPH | 0.0 | 2 | 700 | 03NOV2020 10:03 | LY3819253 700mg IV           |
| 10151003 | 11800017153 | 23_11800017153_323231w_NB11.fastq.gz  | K535N   | 1.167  | 2743.0  | 3206.8961352657000 | 4.01 | NPH | 0.0 | 2 | 700 | 03NOV2020 10:03 | LY3819253 700mg IV           |
| 10151003 | 11800017153 | 23_11800017153_323231w_NB11.fastq.gz  | Q607_   | 1.159  | 2416.0  | 3206.8961352657000 | 4.01 | NPH | 0.0 | 2 | 700 | 03NOV2020 10:03 | LY3819253 700mg IV           |
| 10151003 | 11800017153 | 23_11800017153_323231w_NB11.fastq.gz  | A688V   | 1.382  | 2822.0  | 3206.8961352657000 | 4.01 | NPH | 0.0 | 2 | 700 | 03NOV2020 10:03 | LY3819253 700mg IV           |
| 10161007 | 11818954318 | 65_11818954318_323231w_NF5.fastq.gz   | F43S    | 2.672  | 3256.0  | 1683.3416666666700 | 6.87 | NPH | 0.0 | 2 | 700 | 11NOV2020 11:27 | LY3819253 700mg IV           |
| 10161007 | 11818954318 | 65_11818954318_323231w_NF5.fastq.gz   | R815G   | 1.042  | 96.0    | 1683.3416666666700 | 6.87 | NPH | 0.0 | 2 | 700 | 11NOV2020 11:27 |                              |

|          |             |                                       |         |        |        |                     |      |     |     |   |     |                 |                              |
|----------|-------------|---------------------------------------|---------|--------|--------|---------------------|------|-----|-----|---|-----|-----------------|------------------------------|
| 10181010 | 11856628870 | 13_11856628870_323523w_AF11.fastq.gz  | A688T   | 1.627  | 2335.0 | 3780.43111814859900 | 5.82 | NPH | 0.0 | 2 | 700 | 10NOV2020 09:17 | LY3819253 700mg IV           |
| 10181010 | 11856628870 | 13_11856628870_323523w_AF11.fastq.gz  | A694S   | 1.577  | 2409.0 | 3780.43111814859900 | 5.82 | NPH | 0.0 | 2 | 700 | 10NOV2020 09:17 | LY3819253 700mg IV           |
| 10951003 | 11837774020 | 7_11837774020_323523w_AF5.fastq.gz    | F32del  | 4.3    | 5488.0 | 2436.4182926829300  | 4.52 | NPH | 0.0 | 2 | 700 | 12NOV2020 08:55 | Placebo for LY3819253 700 mg |
| 10951003 | 11837774020 | 7_11837774020_323523w_AF5.fastq.gz    | T33del  | 4.577  | 5156.0 | 2436.4182926829300  | 4.52 | NPH | 0.0 | 2 | 700 | 12NOV2020 08:55 | Placebo for LY3819253 700 mg |
| 10051004 | 11835657294 | B2_11835657294_324023w_AB2.fastq.gz   | K786R   | 2.208  | 906.0  | 2028.396937573620   | 6.72 | NPH | 0.0 | 2 | 700 | 20OCT2020 09:34 | LY3819253 700mg IV           |
| 10051004 | 11835657294 | B2_11835657294_324023w_AB2.fastq.gz   | E819del | 2.667  | 150.0  | 2028.396937573620   | 6.72 | NPH | 0.0 | 2 | 700 | 20OCT2020 09:34 | LY3819253 700mg IV           |
| 10051004 | 11835657294 | B2_11835657294_324023w_AB2.fastq.gz   | D820del | 3.425  | 146.0  | 2028.396937573620   | 6.72 | NPH | 0.0 | 2 | 700 | 20OCT2020 09:34 | LY3819253 700mg IV           |
| 10051004 | 11835657294 | B2_11835657294_324023w_AB2.fastq.gz   | L821del | 3.425  | 146.0  | 2028.396937573620   | 6.72 | NPH | 0.0 | 2 | 700 | 20OCT2020 09:34 | LY3819253 700mg IV           |
| 10051004 | 11835657294 | B2_11835657294_324023w_AB2.fastq.gz   | L822del | 2.703  | 148.0  | 2028.396937573620   | 6.72 | NPH | 0.0 | 2 | 700 | 20OCT2020 09:34 | LY3819253 700mg IV           |
| 10051004 | 11835657294 | B2_11835657294_324023w_AB2.fastq.gz   | G832D   | 4.348  | 138.0  | 2028.396937573620   | 6.72 | NPH | 0.0 | 2 | 700 | 20OCT2020 09:34 | LY3819253 700mg IV           |
| 10051004 | 11835657294 | B2_11835657294_324023w_AB2.fastq.gz   | Q836H   | 1.942  | 103.0  | 2028.396937573620   | 6.72 | NPH | 0.0 | 2 | 700 | 20OCT2020 09:34 | LY3819253 700mg IV           |
| 10021003 | 11833555778 | B11_11833555778_324023w_AB11.fastq.gz | E819del | 3.03   | 33.0   | 2567.487573964500   | 5.46 | NAS | 0.0 | 2 | 700 | 14OCT2020 08:56 | Placebo for LY3819253 700 mg |
| 10021003 | 11833555778 | B11_11833555778_324023w_AB11.fastq.gz | D820del | 3.226  | 31.0   | 2567.487573964500   | 5.46 | NAS | 0.0 | 2 | 700 | 14OCT2020 08:56 | Placebo for LY3819253 700 mg |
| 10021003 | 11833555778 | B11_11833555778_324023w_AB11.fastq.gz | L821del | 3.226  | 31.0   | 2567.487573964500   | 5.46 | NAS | 0.0 | 2 | 700 | 14OCT2020 08:56 | Placebo for LY3819253 700 mg |
| 10331002 | 11839860545 | C12_11839860545_324023w_AC12.fastq.gz | S98P    | 1.017  | 1376.0 | 2523.6251526251500  | 3.29 | NPH | 0.0 | 2 | 700 | 16OCT2020 09:00 | LY3819253 700mg IV           |
| 10171002 | 11833637121 | E11_11833637121_324023w_AE11.fastq.gz | L5F     | 1.262  | 4122.0 | 2618.160756501180   | 6.48 | NPH | 0.0 | 2 | 700 | 14OCT2020 12:56 | Placebo for LY3819253 700 mg |
| 10171002 | 11833637121 | E11_11833637121_324023w_AE11.fastq.gz | K786R   | 2.967  | 1685.0 | 2618.160756501180   | 6.48 | NPH | 0.0 | 2 | 700 | 14OCT2020 12:56 | Placebo for LY3819253 700 mg |
| 10171002 | 11833637121 | E11_11833637121_324023w_AE11.fastq.gz | D820del | 1.126  | 444.0  | 2618.160756501180   | 6.48 | NPH | 0.0 | 2 | 700 | 14OCT2020 12:56 | Placebo for LY3819253 700 mg |
| 10171002 | 11833637121 | E11_11833637121_324023w_AE11.fastq.gz | G832D   | 8.264  | 363.0  | 2618.160756501180   | 6.48 | NPH | 0.0 | 2 | 700 | 14OCT2020 12:56 | Placebo for LY3819253 700 mg |
| 10201007 | 11816847426 | E7_11816847426_324023w_AE7.fastq.gz   | K786R   | 3.059  | 850.0  | 2174.789411764710   | 8.44 | NPH | 0.0 | 2 | 700 | 15OCT2020 10:12 | LY3819253 700mg IV           |
| 10201007 | 11816847426 | E7_11816847426_324023w_AE7.fastq.gz   | E819del | 1.282  | 780.0  | 2174.789411764710   | 8.44 | NPH | 0.0 | 2 | 700 | 15OCT2020 10:12 | LY3819253 700mg IV           |
| 10201007 | 11816847426 | E7_11816847426_324023w_AE7.fastq.gz   | D820del | 1.284  | 779.0  | 2174.789411764710   | 8.44 | NPH | 0.0 | 2 | 700 | 15OCT2020 10:12 | LY3819253 700mg IV           |
| 10201007 | 11816847426 | E7_11816847426_324023w_AE7.fastq.gz   | L821del | 1.16   | 776.0  | 2174.789411764710   | 8.44 | NPH | 0.0 | 2 | 700 | 15OCT2020 10:12 | LY3819253 700mg IV           |
| 10201007 | 11816847426 | E7_11816847426_324023w_AE7.fastq.gz   | G838S   | 1.754  | 57.0   | 2174.789411764710   | 8.44 | NPH | 0.0 | 2 | 700 | 15OCT2020 10:12 | LY3819253 700mg IV           |
| 10201008 | 11837838602 | E6_11837838602_324023w_AE6.fastq.gz   | K786R   | 5.021  | 936.0  | 1932.6137440758300  | 7.7  | NPH | 0.0 | 2 | 700 | 20OCT2020 09:43 | LY3819253 700mg IV           |
| 10201008 | 11837838602 | E6_11837838602_324023w_AE6.fastq.gz   | G832D   | 18.513 | 659.0  | 1932.6137440758300  | 7.7  | NPH | 0.0 | 2 | 700 | 20OCT2020 09:43 | LY3819253 700mg IV           |
| 10201010 | 11820972360 | E4_11820972360_324023w_AE4.fastq.gz   | K786R   | 3.337  | 839.0  | 2354.6760895170800  | 6.28 | NPH | 0.0 | 2 | 700 | 21OCT2020 10:28 | Placebo for LY3819253 700 mg |
| 10201010 | 11820972360 | E4_11820972360_324023w_AE4.fastq.gz   | E819del | 1.829  | 164.0  | 2354.6760895170800  | 6.28 | NPH | 0.0 | 2 | 700 | 21OCT2020 10:28 | Placebo for LY3819253 700 mg |
| 10201010 | 11820972360 | E4_11820972360_324023w_AE4.fastq.gz   | D820del | 1.829  | 164.0  | 2354.6760895170800  | 6.28 | NPH | 0.0 | 2 | 700 | 21OCT2020 10:28 | Placebo for LY3819253 700 mg |
| 10201010 | 11820972360 | E4_11820972360_324023w_AE4.fastq.gz   | L821del | 1.818  | 165.0  | 2354.6760895170800  | 6.28 | NPH | 0.0 | 2 | 700 | 21OCT2020 10:28 | Placebo for LY3819253 700 mg |
| 10201010 | 11820972360 | E4_11820972360_324023w_AE4.fastq.gz   | L822del | 1.212  | 165.0  | 2354.6760895170800  | 6.28 | NPH | 0.0 | 2 | 700 | 21OCT2020 10:28 | Placebo for LY3819253 700 mg |
| 10201010 | 11820972360 | E4_11820972360_324023w_AE4.fastq.gz   | G832D   | 8.451  | 142.0  | 2354.6760895170800  | 6.28 | NPH | 0.0 | 2 | 700 | 21OCT2020 10:28 | Placebo for LY3819253 700 mg |
| 10201010 | 11820972360 | E4_11820972360_324023w_AE4.fastq.gz   | D839Y   | 1.408  | 71.0   | 2354.6760895170800  | 6.28 | NPH | 0.0 | 2 | 700 | 21OCT2020 10:28 | Placebo for LY3819253 700 mg |
| 10141003 | 11806308934 | A4_11806308934_324023w_AA4.fastq.gz   | N487K   | 1.943  | 3963.0 | 2015.9874857792900  | 6.9  | NPH | 0.0 | 2 | 700 | 20OCT2020 09:40 | LY3819253 700mg IV           |
| 10141003 | 11806308934 | A4_11806308934_324023w_AA4.fastq.gz   | K786R   | 1.378  | 1016.0 | 2015.9874857792900  | 6.9  | NPH | 0.0 | 2 | 700 | 20OCT2020 09:40 | LY3819253 700mg IV           |
| 10141003 | 11806308934 | A4_11806308934_324023w_AA4.fastq.gz   | F817del | 2.381  | 630.0  | 2015.9874857792900  | 6.9  | NPH | 0.0 | 2 | 700 | 20OCT2020 09:40 | LY3819253 700mg IV           |
| 10141003 | 11806308934 | A4_11806308934_324023w_AA4.fastq.gz   | I818del | 4.459  | 628.0  | 2015.9874857792900  | 6.9  | NPH | 0.0 | 2 | 700 | 20OCT2020 09:40 | LY3819253 700mg IV           |
| 10141003 | 11806308934 | A4_11806308934_324023w_AA4.fastq.gz   | E819del | 7.563  | 476.0  | 2015.9874857792900  | 6.9  | NPH | 0.0 | 2 | 700 | 20OCT2020 09:40 | LY3819253 700mg IV           |
| 10141003 | 11806308934 | A4_11806308934_324023w_AA4.fastq.gz   | D820del | 7.982  | 451.0  | 2015.9874857792900  | 6.9  | NPH | 0.0 | 2 | 700 | 20OCT2020 09:40 | LY3819253 700mg IV           |
| 10141003 | 11806308934 | A4_11806308934_324023w_AA4.fastq.gz   | L821del | 7.572  | 449.0  | 2015.9874857792900  | 6.9  | NPH | 0.0 | 2 | 700 | 20OCT2020 09:40 | LY3819253 700mg IV           |
| 10141003 | 11806308934 | A4_11806308934_324023w_AA4.fastq.gz   | L822del | 1.865  | 429.0  | 2015.9874857792900  | 6.9  | NPH | 0.0 | 2 | 700 | 20OCT2020 09:40 | LY3819253 700mg IV           |
| 10141003 | 11806308934 | A4_11806308934_324023w_AA4.fastq.gz   | G832D   | 16.351 | 422.0  | 2015.9874857792900  | 6.9  | NPH | 0.0 | 2 | 700 | 20OCT2020 09:40 | LY3819253 700mg IV           |
| 10031014 | 11802184583 | B6_11802184583_324023w_AB6.fastq.gz   | K786R   | 1.153  | 1735.0 | 2344.4528301886800  | 5.31 | NPH | 0.0 | 2 | 700 | 16OCT2020 11:09 | LY3819253 700mg IV           |
| 10031014 | 11802184583 | B6_11802184583_324023w_AB6.fastq.gz   | K814E   | 2.5    | 40.0   | 2344.4528301886800  | 5.31 | NPH | 0.0 | 2 | 700 | 16OCT2020 11:09 | LY3819253 700mg IV           |
| 10031014 | 11802184583 | B6_11802184583_324023w_AB6.fastq.gz   | R815S   | 2.5    | 40.0   | 2344.4528301886800  | 5.31 | NPH | 0.0 | 2 | 700 | 16OCT2020 11:09 | LY3819253 700mg IV           |
| 10031014 | 11802184583 | B6_11802184583_324023w_AB6.fastq.gz   | I818del | 5.263  | 38.0   | 2344.4528301886800  | 5.31 | NPH | 0.0 | 2 | 700 | 16OCT2020 11:09 | LY3819253 700mg IV           |
| 10031014 | 11802184583 | B6_11802184583_324023w_AB6.fastq.gz   | E819del | 10.0   | 20.0   | 2344.4528301886800  | 5.31 | NPH | 0.0 | 2 | 700 | 16OCT2020 11:09 | LY3819253 700mg IV           |
| 10031014 | 11802184583 | B6_11802184583_324023w_AB6.fastq.gz   | D820del | 12.5   | 16.0   | 2344.4528301886800  | 5.31 | NPH | 0.0 | 2 | 700 | 16OCT2020 11:09 | LY3819253 700mg IV           |
| 10031014 | 11802184583 | B6_11802184583_324023w_AB6.fastq.gz   | G832D   | 12.5   | 16.0   | 2344.4528301886800  | 5.31 | NPH | 0.0 | 2 | 700 | 16OCT2020 11:09 | LY3819253 700mg IV           |
| 10141002 | 11806310221 | A5_11806310221_324023w_AA5.fastq.gz   | K786R   | 3.525  | 766.0  | 2203.3985849056600  | 5.58 | NPH | 0.0 | 2 | 700 | 13OCT2020 12:22 | LY3819253 700mg IV           |
| 10141002 | 11806310221 | A5_11806310221_324023w_AA5.fastq.gz   | I818del | 1.818  | 110.0  | 2203.3985849056600  | 5.58 | NPH | 0.0 | 2 | 700 | 13OCT2020 12:22 | LY3819253 700mg IV           |
| 10141002 | 11806310221 | A5_11806310221_324023w_AA5.fastq.gz   | E819del | 5.769  | 52.0   | 2203.3985849056600  | 5.58 | NPH | 0.0 | 2 | 700 | 13OCT2020 12:22 | LY3819253 700mg IV           |
| 10141002 | 11806310221 | A5_11806310221_324023w_AA5.fastq.gz   | D820del | 6.383  | 47.0   | 2203.3985849056600  | 5.58 | NPH | 0.0 | 2 | 700 | 13OCT2020 12:22 | LY3819253 700mg IV           |
| 10141002 | 11806310221 | A5_11806310221_324023w_AA5.fastq.gz   | L821del | 4.348  | 46.0   | 2203.3985849056600  | 5.58 | NPH | 0.0 | 2 | 700 | 13OCT2020 12:22 | LY3819253 700mg IV           |
| 10141002 | 11806310221 | A5_11806310221_324023w_AA5.fastq.gz   | L822del | 2.174  | 46.0   | 2203.3985849056600  | 5.58 | NPH | 0.0 | 2 | 700 | 13OCT2020 12:22 | LY3819253 700mg IV           |
| 10141002 | 11806310221 | A5_11806310221_324023w_AA5.fastq.gz   | G832D   | 12.0   | 50.0   | 2203.3985849056600  | 5.58 | NPH | 0.0 | 2 | 700 | 13OCT2020 12:22 | LY3819253 700mg IV           |
| 10121005 | 11804197187 | A6_11804197187_324023w_AA6.fastq.gz   | K786R   | 2.219  | 1217.0 | 2220.5493421052600  | 8.23 | NPH | 0.0 | 2 | 700 | 21OCT2020 11:12 | Placebo for LY3819253 700 mg |
| 10121005 | 11804197187 | A6_11804197187_324023w_AA6.fastq.gz   | G832D   | 19.031 | 1156.0 | 2220.5493421052600  | 8.23 | NPH | 0.0 | 2 | 700 | 21OCT2020 11:12 | Placebo for LY3819253 700 mg |
| 10011014 | 11835664897 | B12_11835664897_324023w_AB12.fastq.gz | K786R   | 1.19   | 1680.0 | 2072.1413173652700  | 3.82 | NPH | 0.0 | 2 | 700 | 21OCT2020 09:40 | LY3819253 700mg IV           |
| 10011014 | 11835664897 | B12_11835664897_324023w_AB12.fastq.gz | K814N   | 20.0   | 5.0    | 2072.1413173652700  | 3.82 | NPH | 0.0 | 2 | 700 | 21OCT2020 09:40 | LY3819253 700mg IV           |
| 10171003 | 11833640203 | E10_11833640203_324023w_AE10.fastq.gz | T76I    | 1.299  | 2155.0 | 2566.97146254459    | 3.84 | NPH | 0.0 | 2 | 700 | 14OCT2020 12:55 | LY3819253 700mg IV           |
| 10171003 | 11833640203 | E10_11833640203_324023w_AE10.fastq.gz | Y91F    | 1.094  | 1737.0 | 2566.97146254459    | 3.84 | NPH | 0.0 | 2 | 700 | 14OCT2020 12:55 | LY3819253 700mg IV           |
| 10171003 | 11833640203 | E10_11833640203_324023w_AE10.fastq.gz | H146Y   | 1.162  | 1377.0 | 2566.97146254459    | 3.84 | NPH | 0.0 | 2 | 700 | 14OCT2020 12:55 | LY3819253 700mg IV           |
| 10171003 | 11833640203 | E10_11833640203_324023w_AE10.fastq.gz | G181E   | 1.153  | 1475.0 | 2566.97146254459    | 3.84 | NPH | 0.0 | 2 | 700 | 14OCT2020 12:55 | LY3819253 700mg IV           |
| 10171003 | 11833640203 | E10_11833640203_324023w_AE10.fastq.gz | K202N   | 1.164  | 1461.0 |                     |      |     |     |   |     |                 |                              |

|          |             |                                       |          |        |         |                    |      |     |     |   |     |                 |                              |
|----------|-------------|---------------------------------------|----------|--------|---------|--------------------|------|-----|-----|---|-----|-----------------|------------------------------|
| 10221003 | 11839868685 | E2_11839868685_324023w_AE2.fastq.gz   | G832D    | 15.593 | 776.0   | 3872.3201396973200 | 8.06 | NPH | 0.0 | 2 | 700 | 16OCT2020 09:52 | Placebo for LY3819253 700 mg |
| 10161004 | 11839915340 | A1_11839915340_324023w_AA1.fastq.gz   | K786R    | 1.616  | 495.0   | 1966.2700471698100 | 6.31 | NPH | 0.0 | 2 | 700 | 16OCT2020 13:24 | LY3819253 700mg IV           |
| 10161004 | 11839915340 | A1_11839915340_324023w_AA1.fastq.gz   | F817del  | 1.923  | 104.0   | 1966.2700471698100 | 6.31 | NPH | 0.0 | 2 | 700 | 16OCT2020 13:24 | LY3819253 700mg IV           |
| 10161004 | 11839915340 | A1_11839915340_324023w_AA1.fastq.gz   | I818del  | 3.0    | 100.0   | 1966.2700471698100 | 6.31 | NPH | 0.0 | 2 | 700 | 16OCT2020 13:24 | LY3819253 700mg IV           |
| 10161004 | 11839915340 | A1_11839915340_324023w_AA1.fastq.gz   | E819del  | 6.818  | 44.0    | 1966.2700471698100 | 6.31 | NPH | 0.0 | 2 | 700 | 16OCT2020 13:24 | LY3819253 700mg IV           |
| 10161004 | 11839915340 | A1_11839915340_324023w_AA1.fastq.gz   | D820del  | 7.895  | 38.0    | 1966.2700471698100 | 6.31 | NPH | 0.0 | 2 | 700 | 16OCT2020 13:24 | LY3819253 700mg IV           |
| 10161004 | 11839915340 | A1_11839915340_324023w_AA1.fastq.gz   | L821del  | 7.895  | 38.0    | 1966.2700471698100 | 6.31 | NPH | 0.0 | 2 | 700 | 16OCT2020 13:24 | LY3819253 700mg IV           |
| 10161004 | 11839915340 | A1_11839915340_324023w_AA1.fastq.gz   | G832D    | 2.778  | 36.0    | 1966.2700471698100 | 6.31 | NPH | 0.0 | 2 | 700 | 16OCT2020 13:24 | LY3819253 700mg IV           |
| 10021004 | 11833554754 | B10_11833554754_324023w_AB10.fastq.gz | T22I     | 1.899  | 3634.0  | 2582.2329873125700 | 6.44 | NPH | 0.0 | 2 | 700 | 19OCT2020 08:38 | LY3819253 700mg IV           |
| 10021004 | 11833554754 | B10_11833554754_324023w_AB10.fastq.gz | V320F    | 1.588  | 1763.0  | 2582.2329873125700 | 6.44 | NPH | 0.0 | 2 | 700 | 19OCT2020 08:38 | LY3819253 700mg IV           |
| 10021004 | 11833554754 | B10_11833554754_324023w_AB10.fastq.gz | A348T    | 1.468  | 1635.0  | 2582.2329873125700 | 6.44 | NPH | 0.0 | 2 | 700 | 19OCT2020 08:38 | LY3819253 700mg IV           |
| 10021004 | 11833554754 | B10_11833554754_324023w_AB10.fastq.gz | Y453H    | 1.452  | 2548.0  | 2582.2329873125700 | 6.44 | NPH | 0.0 | 2 | 700 | 19OCT2020 08:38 | LY3819253 700mg IV           |
| 10021004 | 11833554754 | B10_11833554754_324023w_AB10.fastq.gz | E484Q    | 3.18   | 5063.0  | 2582.2329873125700 | 6.44 | NPH | 0.0 | 2 | 700 | 19OCT2020 08:38 | LY3819253 700mg IV           |
| 10021004 | 11833554754 | B10_11833554754_324023w_AB10.fastq.gz | E819del  | 1.21   | 248.0   | 2582.2329873125700 | 6.44 | NPH | 0.0 | 2 | 700 | 19OCT2020 08:38 | LY3819253 700mg IV           |
| 10021004 | 11833554754 | B10_11833554754_324023w_AB10.fastq.gz | D820del  | 1.21   | 248.0   | 2582.2329873125700 | 6.44 | NPH | 0.0 | 2 | 700 | 19OCT2020 08:38 | LY3819253 700mg IV           |
| 10021004 | 11833554754 | B10_11833554754_324023w_AB10.fastq.gz | L821del  | 1.215  | 247.0   | 2582.2329873125700 | 6.44 | NPH | 0.0 | 2 | 700 | 19OCT2020 08:38 | LY3819253 700mg IV           |
| 10021004 | 11833554754 | B10_11833554754_324023w_AB10.fastq.gz | G832D    | 10.577 | 208.0   | 2582.2329873125700 | 6.44 | NPH | 0.0 | 2 | 700 | 19OCT2020 08:38 | LY3819253 700mg IV           |
| 10261024 | 11850404941 | D4_11850404941_324023w_AD4.fastq.gz   | K786R    | 2.416  | 1159.0  | 2527.4324644549800 | 7.38 | NPH | 0.0 | 2 | 700 | 12OCT2020 16:45 | LY3819253 700mg IV           |
| 10261024 | 11850404941 | D4_11850404941_324023w_AD4.fastq.gz   | G832D    | 18.721 | 641.0   | 2527.4324644549800 | 7.38 | NPH | 0.0 | 2 | 700 | 12OCT2020 16:45 | LY3819253 700mg IV           |
| 10201009 | 11820972361 | E5_11820972361_324023w_AE5.fastq.gz   | V6F      | 1.131  | 3624.0  | 2291.8341463414600 | 3.7  | NPH | 0.0 | 2 | 700 | 21OCT2020 09:05 | Placebo for LY3819253 700 mg |
| 10201009 | 11820972361 | E5_11820972361_324023w_AE5.fastq.gz   | G107C    | 1.957  | 1584.0  | 2291.8341463414600 | 3.7  | NPH | 0.0 | 2 | 700 | 21OCT2020 09:05 | Placebo for LY3819253 700 mg |
| 10201009 | 11820972361 | E5_11820972361_324023w_AE5.fastq.gz   | F377L    | 1.836  | 926.0   | 2291.8341463414600 | 3.7  | NPH | 0.0 | 2 | 700 | 21OCT2020 09:05 | Placebo for LY3819253 700 mg |
| 10201009 | 11820972361 | E5_11820972361_324023w_AE5.fastq.gz   | G446V    | 1.155  | 8401.0  | 2291.8341463414600 | 3.7  | NPH | 0.0 | 2 | 700 | 21OCT2020 09:05 | Placebo for LY3819253 700 mg |
| 10201009 | 11820972361 | E5_11820972361_324023w_AE5.fastq.gz   | Q563_    | 1.096  | 2372.0  | 2291.8341463414600 | 3.7  | NPH | 0.0 | 2 | 700 | 21OCT2020 09:05 | Placebo for LY3819253 700 mg |
| 10201009 | 11820972361 | E5_11820972361_324023w_AE5.fastq.gz   | K786R    | 3.625  | 938.0   | 2291.8341463414600 | 3.7  | NPH | 0.0 | 2 | 700 | 21OCT2020 09:05 | Placebo for LY3819253 700 mg |
| 10051001 | 11835722054 | B5_11835722054_324023w_AB5.fastq.gz   | H49Y     | 2.62   | 3397.0  | 2085.2160864345700 | 3.12 | NPH | 0.0 | 2 | 700 | 16OCT2020 10:50 | Placebo for LY3819253 700 mg |
| 10051001 | 11835722054 | B5_11835722054_324023w_AB5.fastq.gz   | G181R    | 1.051  | 1047.0  | 2085.2160864345700 | 3.12 | NPH | 0.0 | 2 | 700 | 16OCT2020 10:50 | Placebo for LY3819253 700 mg |
| 10051001 | 11835722054 | B5_11835722054_324023w_AB5.fastq.gz   | G257C    | 1.996  | 1052.0  | 2085.2160864345700 | 3.12 | NPH | 0.0 | 2 | 700 | 16OCT2020 10:50 | Placebo for LY3819253 700 mg |
| 10051001 | 11835722054 | B5_11835722054_324023w_AB5.fastq.gz   | T376I    | 1.628  | 1167.0  | 2085.2160864345700 | 3.12 | NPH | 0.0 | 2 | 700 | 16OCT2020 10:50 | Placebo for LY3819253 700 mg |
| 10051001 | 11835722054 | B5_11835722054_324023w_AB5.fastq.gz   | A570V    | 1.014  | 1873.0  | 2085.2160864345700 | 3.12 | NPH | 0.0 | 2 | 700 | 16OCT2020 10:50 | Placebo for LY3819253 700 mg |
| 10051001 | 11835722054 | B5_11835722054_324023w_AB5.fastq.gz   | S591F    | 1.436  | 1462.0  | 2085.2160864345700 | 3.12 | NPH | 0.0 | 2 | 700 | 16OCT2020 10:50 | Placebo for LY3819253 700 mg |
| 10051001 | 11835722054 | B5_11835722054_324023w_AB5.fastq.gz   | R634C    | 2.35   | 1319.0  | 2085.2160864345700 | 3.12 | NPH | 0.0 | 2 | 700 | 16OCT2020 10:50 | Placebo for LY3819253 700 mg |
| 10051001 | 11835722054 | B5_11835722054_324023w_AB5.fastq.gz   | S698L    | 1.267  | 1026.0  | 2085.2160864345700 | 3.12 | NPH | 0.0 | 2 | 700 | 16OCT2020 10:50 | Placebo for LY3819253 700 mg |
| 10051001 | 11835722054 | B5_11835722054_324023w_AB5.fastq.gz   | S704L    | 1.363  | 1027.0  | 2085.2160864345700 | 3.12 | NPH | 0.0 | 2 | 700 | 16OCT2020 10:50 | Placebo for LY3819253 700 mg |
| 10051001 | 11835722054 | B5_11835722054_324023w_AB5.fastq.gz   | P728L    | 1.394  | 789.0   | 2085.2160864345700 | 3.12 | NPH | 0.0 | 2 | 700 | 16OCT2020 10:50 | Placebo for LY3819253 700 mg |
| 10051001 | 11835722054 | B5_11835722054_324023w_AB5.fastq.gz   | R765C    | 1.017  | 295.0   | 2085.2160864345700 | 3.12 | NPH | 0.0 | 2 | 700 | 16OCT2020 10:50 | Placebo for LY3819253 700 mg |
| 10051001 | 11835722054 | B5_11835722054_324023w_AB5.fastq.gz   | G769_    | 1.408  | 639.0   | 2085.2160864345700 | 3.12 | NPH | 0.0 | 2 | 700 | 16OCT2020 10:50 | Placebo for LY3819253 700 mg |
| 10051001 | 11835722054 | B5_11835722054_324023w_AB5.fastq.gz   | F782S    | 1.447  | 553.0   | 2085.2160864345700 | 3.12 | NPH | 0.0 | 2 | 700 | 16OCT2020 10:50 | Placebo for LY3819253 700 mg |
| 10051001 | 11835722054 | B5_11835722054_324023w_AB5.fastq.gz   | K786R    | 2.462  | 731.0   | 2085.2160864345700 | 3.12 | NPH | 0.0 | 2 | 700 | 16OCT2020 10:50 | Placebo for LY3819253 700 mg |
| 10051001 | 11835722054 | B5_11835722054_324023w_AB5.fastq.gz   | F800L    | 1.433  | 698.0   | 2085.2160864345700 | 3.12 | NPH | 0.0 | 2 | 700 | 16OCT2020 10:50 | Placebo for LY3819253 700 mg |
| 10021005 | 11833555784 | B9_11833555784_324023w_AB9.fastq.gz   | K786R    | 1.511  | 2845.0  | 2394.9245283018900 | 6.23 | NPH | 0.0 | 2 | 700 | 20OCT2020 09:03 | LY3819253 700mg IV           |
| 10021005 | 11833555784 | B9_11833555784_324023w_AB9.fastq.gz   | E819del  | 2.299  | 87.0    | 2394.9245283018900 | 6.23 | NPH | 0.0 | 2 | 700 | 20OCT2020 09:03 | LY3819253 700mg IV           |
| 10021005 | 11833555784 | B9_11833555784_324023w_AB9.fastq.gz   | D820del  | 2.326  | 86.0    | 2394.9245283018900 | 6.23 | NPH | 0.0 | 2 | 700 | 20OCT2020 09:03 | LY3819253 700mg IV           |
| 10021005 | 11833555784 | B9_11833555784_324023w_AB9.fastq.gz   | L821del  | 2.326  | 86.0    | 2394.9245283018900 | 6.23 | NPH | 0.0 | 2 | 700 | 20OCT2020 09:03 | LY3819253 700mg IV           |
| 10021005 | 11833555784 | B9_11833555784_324023w_AB9.fastq.gz   | L821I    | 1.163  | 86.0    | 2394.9245283018900 | 6.23 | NPH | 0.0 | 2 | 700 | 20OCT2020 09:03 | LY3819253 700mg IV           |
| 10021005 | 11833555784 | B9_11833555784_324023w_AB9.fastq.gz   | G832D    | 2.817  | 71.0    | 2394.9245283018900 | 6.23 | NPH | 0.0 | 2 | 700 | 20OCT2020 09:03 | LY3819253 700mg IV           |
| 10021005 | 11833555784 | B9_11833555784_324023w_AB9.fastq.gz   | G832X(GA | 1.408  | 71.0    | 2394.9245283018900 | 6.23 | NPH | 0.0 | 2 | 700 | 20OCT2020 09:03 | LY3819253 700mg IV           |
| 10331001 | 11839925515 | D1_11839925515_324023w_AD1.fastq.gz   | L5F      | 1.739  | 5405.0  | 3586.654028436020  | 6.03 | NPH | 0.0 | 2 | 700 | 14OCT2020 -2:-2 | LY3819253 700mg IV           |
| 10331001 | 11839925515 | D1_11839925515_324023w_AD1.fastq.gz   | G832D    | 4.516  | 155.0   | 3586.654028436020  | 6.03 | NPH | 0.0 | 2 | 700 | 14OCT2020 -2:-2 | LY3819253 700mg IV           |
| 10331001 | 11839925515 | D1_11839925515_324023w_AD1.fastq.gz   | D839G    | 1.064  | 94.0    | 3586.654028436020  | 6.03 | NPH | 0.0 | 2 | 700 | 14OCT2020 -2:-2 | LY3819253 700mg IV           |
| 10011013 | 11816787784 | C1_11816787784_324023w_AC1.fastq.gz   | T167I    | 1.292  | 1006.0  | 1970.9044117647100 | 2.85 | NAS | 0.0 | 2 | 700 | 16OCT2020 10:30 | Placebo for LY3819253 700 mg |
| 10011013 | 11816787784 | C1_11816787784_324023w_AC1.fastq.gz   | T618A    | 1.186  | 1180.0  | 1970.9044117647100 | 2.85 | NAS | 0.0 | 2 | 700 | 16OCT2020 10:30 | Placebo for LY3819253 700 mg |
| 10011013 | 11816787784 | C1_11816787784_324023w_AC1.fastq.gz   | K786R    | 1.788  | 839.0   | 1970.9044117647100 | 2.85 | NAS | 0.0 | 2 | 700 | 16OCT2020 10:30 | Placebo for LY3819253 700 mg |
| 10221002 | 11839933959 | E3_11839933959_324023w_AE3.fastq.gz   | K786R    | 3.33   | 1051.0  | 2307.6             | 3.96 | NPH | 0.0 | 2 | 700 | 14OCT2020 10:21 | LY3819253 700mg IV           |
| 10221002 | 11839933959 | E3_11839933959_324023w_AE3.fastq.gz   | K814N    | 20.0   | 5.0     | 2307.6             | 3.96 | NPH | 0.0 | 2 | 700 | 14OCT2020 10:21 | LY3819253 700mg IV           |
| 10031013 | 11802102408 | B7_11802102408_324023w_AB7.fastq.gz   | V36F     | 4.901  | 3734.0  | 2088.0325693606800 | 2.92 | NAS | 0.0 | 2 | 700 | 14OCT2020 12:07 | Placebo for LY3819253 700 mg |
| 10031013 | 11802102408 | B7_11802102408_324023w_AB7.fastq.gz   | D178A    | 4.274  | 936.0   | 2088.0325693606800 | 2.92 | NAS | 0.0 | 2 | 700 | 14OCT2020 12:07 | Placebo for LY3819253 700 mg |
| 10031013 | 11802102408 | B7_11802102408_324023w_AB7.fastq.gz   | G219V    | 7.058  | 921.0   | 2088.0325693606800 | 2.92 | NAS | 0.0 | 2 | 700 | 14OCT2020 12:07 | Placebo for LY3819253 700 mg |
| 10031013 | 11802102408 | B7_11802102408_324023w_AB7.fastq.gz   | D364H    | 6.753  | 1466.0  | 2088.0325693606800 | 2.92 | NAS | 0.0 | 2 | 700 | 14OCT2020 12:07 | Placebo for LY3819253 700 mg |
| 10031013 | 11802102408 | B7_11802102408_324023w_AB7.fastq.gz   | Q414_    | 1.07   | 10000.0 | 2088.0325693606800 | 2.92 | NAS | 0.0 | 2 | 700 | 14OCT2020 12:07 | Placebo for LY3819253 700 mg |
| 10031013 | 11802102408 | B7_11802102408_324023w_AB7.fastq.gz   | G446V    | 1.162  | 7490.0  | 2088.0325693606800 | 2.92 | NAS | 0.0 | 2 | 700 | 14OCT2020 12:07 | Placebo for LY3819253 700 mg |
| 10031013 | 11802102408 | B7_11802102408_324023w_AB7.fastq.gz   | F456S    | 1.042  | 1728.0  | 2088.0325693606800 | 2.92 | NAS | 0.0 | 2 | 700 | 14OCT2020 12:07 | Placebo for LY3819253 700 mg |
| 10031013 | 11802102408 | B7_11802102408_324023w_AB7.fastq.gz   | T531I    | 1.577  | 2981.0  | 2088.0325693606800 | 2.92 | NAS | 0.0 | 2 | 700 | 14OCT2020 12:07 | Placebo for LY3819253 700 mg |
| 10031013 | 11802102408 | B7_11802102408_324023w_AB7.fastq.gz   | D568G    | 1.33   | 1879.0  | 2088.0325693606800 | 2.92 | NAS | 0.0 | 2 | 700 | 14OCT2020 12:07 | Placebo for LY3819253 700 mg |
| 10031013 | 11802102408 | B7_11802102408_324023w_AB7.fastq.gz   | E583D    |        |         |                    |      |     |     |   |     |                 |                              |

|          |             |                                       |         |        |         |                    |      |     |     |   |     |                 |                              |
|----------|-------------|---------------------------------------|---------|--------|---------|--------------------|------|-----|-----|---|-----|-----------------|------------------------------|
| 10021004 | 11800002888 | 41_11800002888_323555w_BD5.fastq.gz   | S254F   | 99.939 | 1630.0  | 1862.5703883495100 | 3.57 | NAS | 1.0 | 2 | 700 | 20OCT2020 21:24 | LY3819253 700mg IV           |
| 10021004 | 11800002888 | 41_11800002888_323555w_BD5.fastq.gz   | E484K   | 32.901 | 1772.0  | 1862.5703883495100 | 3.57 | NAS | 1.0 | 2 | 700 | 20OCT2020 21:24 | LY3819253 700mg IV           |
| 10021004 | 11800002888 | 41_11800002888_323555w_BD5.fastq.gz   | D614G   | 100.0  | 1383.0  | 1862.5703883495100 | 3.57 | NAS | 1.0 | 2 | 700 | 20OCT2020 21:24 | LY3819253 700mg IV           |
| 10021004 | 11800002888 | 41_11800002888_323555w_BD5.fastq.gz   | K814N   | 50.0   | 2.0     | 1862.5703883495100 | 3.57 | NAS | 1.0 | 2 | 700 | 20OCT2020 21:24 | LY3819253 700mg IV           |
| 10051005 | 11802170702 | 7_11802170702_323555w_BA7.fastq.gz    | D614G   | 99.925 | 1341.0  | 1845.5565006075300 | 7.33 | NAS | 1.0 | 2 | 700 | 29OCT2020 09:00 | LY3819253 700mg IV           |
| 10311011 | 11850332365 | G11_11850332365_323524w_BG11.fastq.gz | D614G   | 99.905 | 1052.0  | 1397.8856447688600 | 5.31 | NAS | 1.0 | 2 | 700 | 13NOV2020 09:00 | LY3819253 700mg IV           |
| 10311011 | 11850332365 | G11_11850332365_323524w_BG11.fastq.gz | P681H   | 100.0  | 844.0   | 1397.8856447688600 | 5.31 | NAS | 1.0 | 2 | 700 | 13NOV2020 09:00 | LY3819253 700mg IV           |
| 10031025 | 11823079046 | 58_11823079046_323232w_AE10.fastq.gz  | D614G   | 99.969 | 3225.0  | 4101.628048780490  | 3.67 | NAS | 1.0 | 2 | 700 | 11NOV2020 17:23 | LY3819253 700mg IV           |
| 10031025 | 11823079046 | 58_11823079046_323232w_AE10.fastq.gz  | K814N   | 100.0  | 1.0     | 4101.628048780490  | 3.67 | NAS | 1.0 | 2 | 700 | 11NOV2020 17:23 | LY3819253 700mg IV           |
| 10051001 | 11802167373 | G10_67373_322773w_NG10.fastq.gz       | A522V   | 22.379 | 2051.0  | 2414.5776699029100 | 2.21 | NAS | 1.0 | 2 | 700 | 17OCT2020 20:00 | Placebo for LY3819253 700 mg |
| 10051001 | 11802167373 | G10_67373_322773w_NG10.fastq.gz       | D614G   | 99.857 | 1396.0  | 2414.5776699029100 | 2.21 | NAS | 1.0 | 2 | 700 | 17OCT2020 20:00 | Placebo for LY3819253 700 mg |
| 10051004 | 11802170444 | H10_11802170444_323513w_NH10.fastq.gz | D138H   | 99.917 | 2417.0  | 2772.650060753340  | 7.52 | NAS | 1.0 | 2 | 700 | 21OCT2020 10:44 | LY3819253 700mg IV           |
| 10051004 | 11802170444 | H10_11802170444_323513w_NH10.fastq.gz | D614G   | 100.0  | 2014.0  | 2772.650060753340  | 7.52 | NAS | 1.0 | 2 | 700 | 21OCT2020 10:44 | LY3819253 700mg IV           |
| 10661002 | 11837767300 | 10_11837767300_323230w_CD12.fastq.gz  | T33I    | 99.736 | 3030.0  | 1047.3325153374200 | 2.8  | NAS | 1.0 | 2 | 700 | 14NOV2020 19:30 | LY3819253 700mg IV           |
| 10661002 | 11837767300 | 10_11837767300_323230w_CD12.fastq.gz  | D614G   | 99.756 | 819.0   | 1047.3325153374200 | 2.8  | NAS | 1.0 | 2 | 700 | 14NOV2020 19:30 | LY3819253 700mg IV           |
| 10661002 | 11837767300 | 10_11837767300_323230w_CD12.fastq.gz  | K814N   | 100.0  | 1.0     | 1047.3325153374200 | 2.8  | NAS | 1.0 | 2 | 700 | 14NOV2020 19:30 | LY3819253 700mg IV           |
| 10201008 | 11821039944 | E12_11821039944_323690w_BE12.fastq.gz | D614G   | 99.708 | 2396.0  | 3066.1073170731700 | 5.33 | NAS | 3   | 2 | 700 | 23OCT2020 16:30 | LY3819253 700mg IV           |
| 10201008 | 11821039944 | E12_11821039944_323690w_BE12.fastq.gz | P681R   | 99.909 | 2192.0  | 3066.1073170731700 | 5.33 | NAS | 3   | 2 | 700 | 23OCT2020 16:30 | LY3819253 700mg IV           |
| 10491002 | 11856650244 | B10_11856650244_323690w_BB10.fastq.gz | S162N   | 33.333 | 3.0     | 1124.12            | 6.9  | NAS | 1.0 | 2 | 700 | 12NOV2020 11:20 | Placebo for LY3819253 700 mg |
| 10491002 | 11856650244 | B10_11856650244_323690w_BB10.fastq.gz | D614G   | 99.614 | 259.0   | 1124.12            | 6.9  | NAS | 1.0 | 2 | 700 | 12NOV2020 11:20 | Placebo for LY3819253 700 mg |
| 10251008 | 11816849220 | E8_11816849220_323690w_BE8.fastq.gz   | D614G   | 99.702 | 1678.0  | 1815.8830694275300 | 5.61 | NAS | 1.0 | 2 | 700 | 27OCT2020 18:04 | LY3819253 700mg IV           |
| 10311014 | 11852511045 | A9_11852511045_323690w_BA9.fastq.gz   | D614G   | 99.923 | 1303.0  | 1720.0170316301700 | 5.3  | NAS | 1.0 | 2 | 700 | 19NOV2020 07:45 | Placebo for LY3819253 700 mg |
| 10311014 | 11852511045 | A9_11852511045_323690w_BA9.fastq.gz   | N679H   | 81.173 | 1551.0  | 1720.0170316301700 | 5.3  | NAS | 1.0 | 2 | 700 | 19NOV2020 07:45 | Placebo for LY3819253 700 mg |
| 10311014 | 11852511045 | A9_11852511045_323690w_BA9.fastq.gz   | K814N   | 75.0   | 8.0     | 1720.0170316301700 | 5.3  | NAS | 1.0 | 2 | 700 | 19NOV2020 07:45 | Placebo for LY3819253 700 mg |
| 10201011 | 11821037899 | A9_11821037899_323692w_NA9.fastq.gz   | D614G   | 99.836 | 2446.0  | 2886.2125890736300 | 8.7  | NAS | 1.0 | 2 | 700 | 29OCT2020 18:00 | Placebo for LY3819253 700 mg |
| 10051009 | 11852437441 | B10_11852437441_323692w_NB10.fastq.gz | D614G   | 99.979 | 4763.0  | 5824.134637514380  | 6.83 | NAS | 1.0 | 2 | 700 | 14NOV2020 18:00 | LY3819253 700mg IV           |
| 10261032 | 11816867971 | D2_11816867971_323692w_ND2.fastq.gz   | D614G   | 99.847 | 1958.0  | 2446.63215590743   | 5.66 | NAS | 1.0 | 2 | 700 | 13NOV2020 19:03 | Placebo for LY3819253 700 mg |
| 10221006 | 11806312964 | A4_11806312964_323692w_NA4.fastq.gz   | S13I    | 99.842 | 6966.0  | 2849.980463980460  | 5.42 | NAS | 1.0 | 2 | 700 | 28OCT2020 18:45 | LY3819253 700mg IV           |
| 10221006 | 11806312964 | A4_11806312964_323692w_NA4.fastq.gz   | W152C   | 99.523 | 2723.0  | 2849.980463980460  | 5.42 | NAS | 1.0 | 2 | 700 | 28OCT2020 18:45 | LY3819253 700mg IV           |
| 10221006 | 11806312964 | A4_11806312964_323692w_NA4.fastq.gz   | L452R   | 99.772 | 3065.0  | 2849.980463980460  | 5.42 | NAS | 1.0 | 2 | 700 | 28OCT2020 18:45 | LY3819253 700mg IV           |
| 10221006 | 11806312964 | A4_11806312964_323692w_NA4.fastq.gz   | D614G   | 99.547 | 2206.0  | 2849.980463980460  | 5.42 | NAS | 1.0 | 2 | 700 | 28OCT2020 18:45 | LY3819253 700mg IV           |
| 10021004 | 11800002888 | 41_11800002888_323555w_BD5.fastq.gz   | G219V   | 1.61   | 1677.0  | 1862.5703883495100 | 3.57 | NAS | 1.0 | 2 | 700 | 20OCT2020 21:24 | LY3819253 700mg IV           |
| 10021004 | 11800002888 | 41_11800002888_323555w_BD5.fastq.gz   | Y269H   | 1.336  | 1647.0  | 1862.5703883495100 | 3.57 | NAS | 1.0 | 2 | 700 | 20OCT2020 21:24 | LY3819253 700mg IV           |
| 10021004 | 11800002888 | 41_11800002888_323555w_BD5.fastq.gz   | T307I   | 1.017  | 1770.0  | 1862.5703883495100 | 3.57 | NAS | 1.0 | 2 | 700 | 20OCT2020 21:24 | LY3819253 700mg IV           |
| 10021004 | 11800002888 | 41_11800002888_323555w_BD5.fastq.gz   | E484Q   | 18.397 | 1772.0  | 1862.5703883495100 | 3.57 | NAS | 1.0 | 2 | 700 | 20OCT2020 21:24 | LY3819253 700mg IV           |
| 10021004 | 11800002888 | 41_11800002888_323555w_BD5.fastq.gz   | A668V   | 1.018  | 1081.0  | 1862.5703883495100 | 3.57 | NAS | 1.0 | 2 | 700 | 20OCT2020 21:24 | LY3819253 700mg IV           |
| 10021004 | 11800002888 | 41_11800002888_323555w_BD5.fastq.gz   | A706V   | 1.952  | 922.0   | 1862.5703883495100 | 3.57 | NAS | 1.0 | 2 | 700 | 20OCT2020 21:24 | LY3819253 700mg IV           |
| 10021004 | 11800002888 | 41_11800002888_323555w_BD5.fastq.gz   | L767F   | 1.167  | 257.0   | 1862.5703883495100 | 3.57 | NAS | 1.0 | 2 | 700 | 20OCT2020 21:24 | LY3819253 700mg IV           |
| 10051005 | 11802170702 | 7_11802170702_323555w_BA7.fastq.gz    | L8F     | 1.631  | 6192.0  | 1845.5565006075300 | 7.33 | NAS | 1.0 | 2 | 700 | 29OCT2020 09:00 | LY3819253 700mg IV           |
| 10051005 | 11802170702 | 7_11802170702_323555w_BA7.fastq.gz    | T19I    | 4.744  | 5881.0  | 1845.5565006075300 | 7.33 | NAS | 1.0 | 2 | 700 | 29OCT2020 09:00 | LY3819253 700mg IV           |
| 10051005 | 11802170702 | 7_11802170702_323555w_BA7.fastq.gz    | L84P    | 2.213  | 1988.0  | 1845.5565006075300 | 7.33 | NAS | 1.0 | 2 | 700 | 29OCT2020 09:00 | LY3819253 700mg IV           |
| 10051005 | 11802170702 | 7_11802170702_323555w_BA7.fastq.gz    | F86I    | 3.18   | 1981.0  | 1845.5565006075300 | 7.33 | NAS | 1.0 | 2 | 700 | 29OCT2020 09:00 | LY3819253 700mg IV           |
| 10311011 | 11850332365 | G11_11850332365_323524w_BG11.fastq.gz | P26L    | 4.381  | 4337.0  | 1397.8856447688600 | 5.31 | NAS | 1.0 | 2 | 700 | 13NOV2020 09:00 | LY3819253 700mg IV           |
| 10311011 | 11850332365 | G11_11850332365_323524w_BG11.fastq.gz | S686R   | 1.116  | 627.0   | 1397.8856447688600 | 5.31 | NAS | 1.0 | 2 | 700 | 13NOV2020 09:00 | LY3819253 700mg IV           |
| 10311011 | 11850332365 | G11_11850332365_323524w_BG11.fastq.gz | A694S   | 1.017  | 688.0   | 1397.8856447688600 | 5.31 | NAS | 1.0 | 2 | 700 | 13NOV2020 09:00 | LY3819253 700mg IV           |
| 10311011 | 11850332365 | G11_11850332365_323524w_BG11.fastq.gz | S803L   | 1.719  | 1396.0  | 1397.8856447688600 | 5.31 | NAS | 1.0 | 2 | 700 | 13NOV2020 09:00 | LY3819253 700mg IV           |
| 10031025 | 11823079046 | 58_11823079046_323232w_AE10.fastq.gz  | P26T    | 1.15   | 10000.0 | 4101.628048780490  | 3.67 | NAS | 1.0 | 2 | 700 | 11NOV2020 17:23 | LY3819253 700mg IV           |
| 10031025 | 11823079046 | 58_11823079046_323232w_AE10.fastq.gz  | F65S    | 1.603  | 5552.0  | 4101.628048780490  | 3.67 | NAS | 1.0 | 2 | 700 | 11NOV2020 17:23 | LY3819253 700mg IV           |
| 10031025 | 11823079046 | 58_11823079046_323232w_AE10.fastq.gz  | G142V   | 1.353  | 3400.0  | 4101.628048780490  | 3.67 | NAS | 1.0 | 2 | 700 | 11NOV2020 17:23 | LY3819253 700mg IV           |
| 10031025 | 11823079046 | 58_11823079046_323232w_AE10.fastq.gz  | A522S   | 5.503  | 3834.0  | 4101.628048780490  | 3.67 | NAS | 1.0 | 2 | 700 | 11NOV2020 17:23 | LY3819253 700mg IV           |
| 10031025 | 11823079046 | 58_11823079046_323232w_AE10.fastq.gz  | E702K   | 1.691  | 2957.0  | 4101.628048780490  | 3.67 | NAS | 1.0 | 2 | 700 | 11NOV2020 17:23 | LY3819253 700mg IV           |
| 10051001 | 11802167373 | G10_67373_322773w_NG10.fastq.gz       | D405Y   | 11.111 | 9.0     | 2414.5776699029100 | 2.21 | NAS | 1.0 | 2 | 700 | 17OCT2020 20:00 | Placebo for LY3819253 700 mg |
| 10051001 | 11802167373 | G10_67373_322773w_NG10.fastq.gz       | P665del | 6.551  | 1099.0  | 2414.5776699029100 | 2.21 | NAS | 1.0 | 2 | 700 | 17OCT2020 20:00 | Placebo for LY3819253 700 mg |
| 10051001 | 11802167373 | G10_67373_322773w_NG10.fastq.gz       | I666del | 6.63   | 1086.0  | 2414.5776699029100 | 2.21 | NAS | 1.0 | 2 | 700 | 17OCT2020 20:00 | Placebo for LY3819253 700 mg |
| 10051004 | 11802170444 | H10_11802170444_323513w_NH10.fastq.gz | V16A    | 2.336  | 8434.0  | 2772.650060753340  | 7.52 | NAS | 1.0 | 2 | 700 | 21OCT2020 10:44 | LY3819253 700mg IV           |
| 10051004 | 11802170444 | H10_11802170444_323513w_NH10.fastq.gz | F43T    | 2.109  | 3462.0  | 2772.650060753340  | 7.52 | NAS | 1.0 | 2 | 700 | 21OCT2020 10:44 | LY3819253 700mg IV           |
| 10051004 | 11802170444 | H10_11802170444_323513w_NH10.fastq.gz | S735_   | 3.148  | 2573.0  | 2772.650060753340  | 7.52 | NAS | 1.0 | 2 | 700 | 21OCT2020 10:44 | LY3819253 700mg IV           |
| 10051004 | 11802170444 | H10_11802170444_323513w_NH10.fastq.gz | D737N   | 3.098  | 2582.0  | 2772.650060753340  | 7.52 | NAS | 1.0 | 2 | 700 | 21OCT2020 10:44 | LY3819253 700mg IV           |
| 10201008 | 11821039944 | E12_11821039944_323690w_BE12.fastq.gz | P295T   | 1.117  | 2955.0  | 3066.1073170731700 | 5.33 | NAS | 3   | 2 | 700 | 23OCT2020 16:30 | LY3819253 700mg IV           |
| 10201008 | 11821039944 | E12_11821039944_323690w_BE12.fastq.gz | T791I   | 3.403  | 3291.0  | 3066.1073170731700 | 5.33 | NAS | 3   | 2 | 700 | 23OCT2020 16:30 | LY3819253 700mg IV           |
| 10491002 | 11856650244 | B10_11856650244_323690w_BB10.fastq.gz | G35S    | 2.345  | 597.0   | 1124.12            | 6.9  | NAS | 1.0 | 2 | 700 | 12NOV2020 11:20 | Placebo for LY3819253 700 mg |
| 10491002 | 11856650244 | B10_11856650244_323690w_BB10.fastq.gz | K814N   | 1.176  | 85.0    | 1124.12            | 6.9  | NAS | 1.0 | 2 | 700 | 12NOV2020 11:20 | Placebo for LY3819253 700 mg |
| 10251008 | 11816849220 | E8_11816849220_323690w_BE8.fastq.gz   | F782V   | 1.263  | 1267.0  | 1815.8830694275300 | 5.61 | NAS | 1.0 | 2 | 700 | 27OCT2020 18:04 | LY3819253 700mg IV           |
| 10251008 | 11816849220 | E8_11816849220_323690w_BE8.fastq.gz   | A783V   | 1.196  | 1254.0  | 1815.8830694275300 | 5.61 | NAS | 1.0 | 2 | 700 | 27OCT2020 18:04 | LY3819253 700mg IV           |
| 10311014 | 11852511045 | A9_11852511045                        |         |        |         |                    |      |     |     |   |     |                 |                              |

|          |             |                                       |         |        |         |                    |      |     |     |   |     |                 |                              |
|----------|-------------|---------------------------------------|---------|--------|---------|--------------------|------|-----|-----|---|-----|-----------------|------------------------------|
| 10021004 | 11800003400 | 42_11800003400_323555w_BD6.fastq.gz   | E484K   | 98.121 | 1703.0  | 1816.452205882350  | 3.94 | NAS | 2.0 | 2 | 700 | 21OCT2020 21:24 | LY3819253 700mg IV           |
| 10021004 | 11800003400 | 42_11800003400_323555w_BD6.fastq.gz   | D614G   | 100.0  | 1218.0  | 1816.452205882350  | 3.94 | NAS | 2.0 | 2 | 700 | 21OCT2020 21:24 | LY3819253 700mg IV           |
| 10021004 | 11800003400 | 42_11800003400_323555w_BD6.fastq.gz   | K814N   | 100.0  | 1.0     | 1816.452205882350  | 3.94 | NAS | 2.0 | 2 | 700 | 21OCT2020 21:24 | LY3819253 700mg IV           |
| 10051004 | 11802168655 | 3_11802168655_323555w_BA3.fastq.gz    | D138H   | 99.89  | 2719.0  | 3212.958435207820  | 5.28 | NAS | 2.0 | 2 | 700 | 22OCT2020 10:35 | LY3819253 700mg IV           |
| 10051004 | 11802168655 | 3_11802168655_323555w_BA3.fastq.gz    | D614G   | 100.0  | 2434.0  | 3212.958435207820  | 5.28 | NAS | 2.0 | 2 | 700 | 22OCT2020 10:35 | LY3819253 700mg IV           |
| 10371006 | 11833645067 | E6_11833645067_323524w_BE6.fastq.gz   | D614G   | 99.893 | 936.0   | 1221.770731707320  | 8.08 | NPH | 2.0 | 2 | 700 | 06NOV2020 13:15 | Placebo for LY3819253 700 mg |
| 10011015 | 11839856195 | B7_11839856195_323524w_BB7.fastq.gz   | D614G   | 99.864 | 738.0   | 917.2462686567160  | 2.08 | NAS | 2.0 | 2 | 700 | 29OCT2020 19:00 | LY3819253 700mg IV           |
| 10031025 | 11818950282 | 59_11818950282_323232w_AE11.fastq.gz  | D614G   | 100.0  | 3419.0  | 4202.741545893720  | 3.8  | NAS | 2.0 | 2 | 700 | 12NOV2020 17:16 | LY3819253 700mg IV           |
| 10201008 | 11854527234 | E2_11854527234_323690w_BE2.fastq.gz   | D614G   | 99.897 | 1941.0  | 2010.4301801801800 | 7.01 | NAS | 1   | 2 | 700 | 21OCT2020 18:30 | LY3819253 700mg IV           |
| 10201008 | 11854527234 | E2_11854527234_323690w_BE2.fastq.gz   | P681R   | 99.815 | 1618.0  | 2010.4301801801800 | 7.01 | NAS | 1   | 2 | 700 | 21OCT2020 18:30 | LY3819253 700mg IV           |
| 10491002 | 11856715276 | A5_11856715276_323690w_BA5.fastq.gz   | D614G   | 99.824 | 2270.0  | 3077.3809523809500 | 6.07 | NAS | 2.0 | 2 | 700 | 12NOV2020 11:20 | Placebo for LY3819253 700 mg |
| 10251008 | 11839933131 | E9_11839933131_323690w_BE9.fastq.gz   | D614G   | 99.86  | 1425.0  | 1606.2971985383700 | 7.24 | NAS | 2.0 | 2 | 700 | 28OCT2020 16:40 | LY3819253 700mg IV           |
| 10221006 | 11806314244 | A7_11806314244_323692w_NA7.fastq.gz   | S13I    | 99.89  | 8216.0  | 3021.206812652070  | 4.08 | NAS | 2.0 | 2 | 700 | 29OCT2020 22:29 | LY3819253 700mg IV           |
| 10221006 | 11806314244 | A7_11806314244_323692w_NA7.fastq.gz   | W152C   | 99.821 | 2791.0  | 3021.206812652070  | 4.08 | NAS | 2.0 | 2 | 700 | 29OCT2020 22:29 | LY3819253 700mg IV           |
| 10221006 | 11806314244 | A7_11806314244_323692w_NA7.fastq.gz   | L452R   | 99.838 | 3094.0  | 3021.206812652070  | 4.08 | NAS | 2.0 | 2 | 700 | 29OCT2020 22:29 | LY3819253 700mg IV           |
| 10221006 | 11806314244 | A7_11806314244_323692w_NA7.fastq.gz   | S494L   | 26.391 | 2929.0  | 3021.206812652070  | 4.08 | NAS | 2.0 | 2 | 700 | 29OCT2020 22:29 | LY3819253 700mg IV           |
| 10221006 | 11806314244 | A7_11806314244_323692w_NA7.fastq.gz   | D614G   | 99.658 | 2336.0  | 3021.206812652070  | 4.08 | NAS | 2.0 | 2 | 700 | 29OCT2020 22:29 | LY3819253 700mg IV           |
| 10051009 | 11810494025 | B11_11810494025_323692w_NB11.fastq.gz | D614G   | 99.921 | 2528.0  | 3630.704517704520  | 4.65 | NAS | 2.0 | 2 | 700 | 15NOV2020 18:00 | LY3819253 700mg IV           |
| 10261032 | 11818948869 | C11_11818948869_323692w_NC11.fastq.gz | W258L   | 36.196 | 2329.0  | 2714.640340218710  | 6.07 | NAS | 2.0 | 2 | 700 | 14NOV2020 18:51 | Placebo for LY3819253 700 mg |
| 10261032 | 11818948869 | C11_11818948869_323692w_NC11.fastq.gz | D614G   | 99.944 | 1778.0  | 2714.640340218710  | 6.07 | NAS | 2.0 | 2 | 700 | 14NOV2020 18:51 | Placebo for LY3819253 700 mg |
| 10201011 | 11854529035 | A10_11854529035_323692w_NA10.fastq.gz | D614G   | 99.687 | 2559.0  | 3163.5912743972400 | 7.81 | NAS | 2.0 | 2 | 700 | 30OCT2020 18:00 | Placebo for LY3819253 700 mg |
| 10131008 | 11850345285 | E11_11850345285_324020w_NE11.fastq.gz | T95S    | 2.001  | 2799.0  | 4632.319662243670  | 3.11 | NAS | 2.0 | 2 | 700 | 05NOV2020 17:44 | Placebo for LY3819253 700 mg |
| 10131008 | 11850345285 | E11_11850345285_324020w_NE11.fastq.gz | T167A   | 2.237  | 2548.0  | 4632.319662243670  | 3.11 | NAS | 2.0 | 2 | 700 | 05NOV2020 17:44 | Placebo for LY3819253 700 mg |
| 10131008 | 11850345285 | E11_11850345285_324020w_NE11.fastq.gz | A262V   | 2.58   | 2287.0  | 4632.319662243670  | 3.11 | NAS | 2.0 | 2 | 700 | 05NOV2020 17:44 | Placebo for LY3819253 700 mg |
| 10131008 | 11850345285 | E11_11850345285_324020w_NE11.fastq.gz | T274I   | 2.648  | 2341.0  | 4632.319662243670  | 3.11 | NAS | 2.0 | 2 | 700 | 05NOV2020 17:44 | Placebo for LY3819253 700 mg |
| 10131008 | 11850345285 | E11_11850345285_324020w_NE11.fastq.gz | D290E   | 2.61   | 2874.0  | 4632.319662243670  | 3.11 | NAS | 2.0 | 2 | 700 | 05NOV2020 17:44 | Placebo for LY3819253 700 mg |
| 10131008 | 11850345285 | E11_11850345285_324020w_NE11.fastq.gz | S297L   | 8.596  | 3048.0  | 4632.319662243670  | 3.11 | NAS | 2.0 | 2 | 700 | 05NOV2020 17:44 | Placebo for LY3819253 700 mg |
| 10131008 | 11850345285 | E11_11850345285_324020w_NE11.fastq.gz | A397T   | 1.277  | 9399.0  | 4632.319662243670  | 3.11 | NAS | 2.0 | 2 | 700 | 05NOV2020 17:44 | Placebo for LY3819253 700 mg |
| 10131008 | 11850345285 | E11_11850345285_324020w_NE11.fastq.gz | A475P   | 2.816  | 7989.0  | 4632.319662243670  | 3.11 | NAS | 2.0 | 2 | 700 | 05NOV2020 17:44 | Placebo for LY3819253 700 mg |
| 10131008 | 11850345285 | E11_11850345285_324020w_NE11.fastq.gz | G744A   | 1.524  | 3149.0  | 4632.319662243670  | 3.11 | NAS | 2.0 | 2 | 700 | 05NOV2020 17:44 | Placebo for LY3819253 700 mg |
| 10131008 | 11850345285 | E11_11850345285_324020w_NE11.fastq.gz | T761I   | 2.302  | 1955.0  | 4632.319662243670  | 3.11 | NAS | 2.0 | 2 | 700 | 05NOV2020 17:44 | Placebo for LY3819253 700 mg |
| 10051005 | 11802168653 | 17_11802168653_323555w_BB5.fastq.gz   | S750N   | 1.02   | 490.0   | 1713.8443627451000 | 5.14 | NAS | 2.0 | 2 | 700 | 31OCT2020 20:30 | LY3819253 700mg IV           |
| 10021004 | 11800003400 | 42_11800003400_323555w_BD6.fastq.gz   | L5F     | 1.092  | 4761.0  | 1816.452205882350  | 3.94 | NAS | 2.0 | 2 | 700 | 21OCT2020 21:24 | LY3819253 700mg IV           |
| 10371006 | 11833645067 | E6_11833645067_323524w_BE6.fastq.gz   | S686G   | 1.026  | 877.0   | 1221.770731707320  | 8.08 | NPH | 2.0 | 2 | 700 | 06NOV2020 13:15 | Placebo for LY3819253 700 mg |
| 10011015 | 11839856195 | B7_11839856195_323524w_BB7.fastq.gz   | G404R   | 1.469  | 1021.0  | 917.2462686567160  | 2.08 | NAS | 2.0 | 2 | 700 | 29OCT2020 19:00 | LY3819253 700mg IV           |
| 10011015 | 11839856195 | B7_11839856195_323524w_BB7.fastq.gz   | G880S   | 5.882  | 17.0    | 917.2462686567160  | 2.08 | NAS | 2.0 | 2 | 700 | 29OCT2020 19:00 | LY3819253 700mg IV           |
| 10011015 | 11839856195 | B7_11839856195_323524w_BB7.fastq.gz   | T887P   | 5.882  | 17.0    | 917.2462686567160  | 2.08 | NAS | 2.0 | 2 | 700 | 29OCT2020 19:00 | LY3819253 700mg IV           |
| 10011015 | 11839856195 | B7_11839856195_323524w_BB7.fastq.gz   | A903V   | 6.667  | 15.0    | 917.2462686567160  | 2.08 | NAS | 2.0 | 2 | 700 | 29OCT2020 19:00 | LY3819253 700mg IV           |
| 10031025 | 11818950282 | 59_11818950282_323232w_AE11.fastq.gz  | T20I    | 1.85   | 10000.0 | 4202.741545893720  | 3.8  | NAS | 2.0 | 2 | 700 | 12NOV2020 17:16 | LY3819253 700mg IV           |
| 10031025 | 11818950282 | 59_11818950282_323232w_AE11.fastq.gz  | D53Y    | 1.866  | 8950.0  | 4202.741545893720  | 3.8  | NAS | 2.0 | 2 | 700 | 12NOV2020 17:16 | LY3819253 700mg IV           |
| 10031025 | 11818950282 | 59_11818950282_323232w_AE11.fastq.gz  | S161F   | 1.903  | 4415.0  | 4202.741545893720  | 3.8  | NAS | 2.0 | 2 | 700 | 12NOV2020 17:16 | LY3819253 700mg IV           |
| 10031025 | 11818950282 | 59_11818950282_323232w_AE11.fastq.gz  | K202N   | 2.017  | 4661.0  | 4202.741545893720  | 3.8  | NAS | 2.0 | 2 | 700 | 12NOV2020 17:16 | LY3819253 700mg IV           |
| 10031025 | 11818950282 | 59_11818950282_323232w_AE11.fastq.gz  | P330R   | 1.898  | 4109.0  | 4202.741545893720  | 3.8  | NAS | 2.0 | 2 | 700 | 12NOV2020 17:16 | LY3819253 700mg IV           |
| 10031025 | 11818950282 | 59_11818950282_323232w_AE11.fastq.gz  | C361G   | 1.408  | 4331.0  | 4202.741545893720  | 3.8  | NAS | 2.0 | 2 | 700 | 12NOV2020 17:16 | LY3819253 700mg IV           |
| 10031025 | 11818950282 | 59_11818950282_323232w_AE11.fastq.gz  | T415A   | 1.954  | 4095.0  | 4202.741545893720  | 3.8  | NAS | 2.0 | 2 | 700 | 12NOV2020 17:16 | LY3819253 700mg IV           |
| 10031025 | 11818950282 | 59_11818950282_323232w_AE11.fastq.gz  | D442N   | 2.21   | 4117.0  | 4202.741545893720  | 3.8  | NAS | 2.0 | 2 | 700 | 12NOV2020 17:16 | LY3819253 700mg IV           |
| 10031025 | 11818950282 | 59_11818950282_323232w_AE11.fastq.gz  | Y508F   | 2.237  | 3978.0  | 4202.741545893720  | 3.8  | NAS | 2.0 | 2 | 700 | 12NOV2020 17:16 | LY3819253 700mg IV           |
| 10031025 | 11818950282 | 59_11818950282_323232w_AE11.fastq.gz  | C662S   | 1.501  | 3132.0  | 4202.741545893720  | 3.8  | NAS | 2.0 | 2 | 700 | 12NOV2020 17:16 | LY3819253 700mg IV           |
| 10201008 | 11854527234 | E2_11854527234_323690w_BE2.fastq.gz   | F43T    | 2.043  | 3475.0  | 2010.4301801801800 | 7.01 | NAS | 1   | 2 | 700 | 21OCT2020 18:30 | LY3819253 700mg IV           |
| 10201008 | 11854527234 | E2_11854527234_323690w_BE2.fastq.gz   | A783V   | 1.343  | 2160.0  | 2010.4301801801800 | 7.01 | NAS | 1   | 2 | 700 | 21OCT2020 18:30 | LY3819253 700mg IV           |
| 10201008 | 11854527234 | E2_11854527234_323690w_BE2.fastq.gz   | T791I   | 2.053  | 2094.0  | 2010.4301801801800 | 7.01 | NAS | 1   | 2 | 700 | 21OCT2020 18:30 | LY3819253 700mg IV           |
| 10251008 | 11839933131 | E9_11839933131_323690w_BE9.fastq.gz   | F782V   | 1.089  | 1378.0  | 1606.2971985383700 | 7.24 | NAS | 2.0 | 2 | 700 | 28OCT2020 16:40 | LY3819253 700mg IV           |
| 10251008 | 11839933131 | E9_11839933131_323690w_BE9.fastq.gz   | A783V   | 1.457  | 1373.0  | 1606.2971985383700 | 7.24 | NAS | 2.0 | 2 | 700 | 28OCT2020 16:40 | LY3819253 700mg IV           |
| 10221006 | 11806314244 | A7_11806314244_323692w_NA7.fastq.gz   | A783V   | 1.206  | 1244.0  | 3021.206812652070  | 4.08 | NAS | 2.0 | 2 | 700 | 29OCT2020 22:29 | LY3819253 700mg IV           |
| 10221006 | 11806314244 | A7_11806314244_323692w_NA7.fastq.gz   | K814M   | 16.667 | 6.0     | 3021.206812652070  | 4.08 | NAS | 2.0 | 2 | 700 | 29OCT2020 22:29 | LY3819253 700mg IV           |
| 10221006 | 11806314244 | A7_11806314244_323692w_NA7.fastq.gz   | K814T   | 16.667 | 6.0     | 3021.206812652070  | 4.08 | NAS | 2.0 | 2 | 700 | 29OCT2020 22:29 | LY3819253 700mg IV           |
| 10261032 | 11818948869 | C11_11818948869_323692w_NC11.fastq.gz | L241del | 1.949  | 2155.0  | 2714.640340218710  | 6.07 | NAS | 2.0 | 2 | 700 | 14NOV2020 18:51 | Placebo for LY3819253 700 mg |
| 10261032 | 11818948869 | C11_11818948869_323692w_NC11.fastq.gz | L242del | 2.001  | 2149.0  | 2714.640340218710  | 6.07 | NAS | 2.0 | 2 | 700 | 14NOV2020 18:51 | Placebo for LY3819253 700 mg |
| 10261032 | 11818948869 | C11_11818948869_323692w_NC11.fastq.gz | R246T   | 1.148  | 2178.0  | 2714.640340218710  | 6.07 | NAS | 2.0 | 2 | 700 | 14NOV2020 18:51 | Placebo for LY3819253 700 mg |
| 10261032 | 11818948869 | C11_11818948869_323692w_NC11.fastq.gz | V772D   | 1.045  | 6124.0  | 2714.640340218710  | 6.07 | NAS | 2.0 | 2 | 700 | 14NOV2020 18:51 | Placebo for LY3819253 700 mg |
| 10201011 | 11854529035 | A10_11854529035_323692w_NA10.fastq.gz | S172Y   | 4.789  | 3111.0  | 3163.5912743972400 | 7.81 | NAS | 2.0 | 2 | 700 | 30OCT2020 18:00 | Placebo for LY3819253 700 mg |
| 10021003 | 11833621760 | 9_21760_322795w_BF4.fastq.gz          | D614G   | 99.84  | 1872.0  | 2820.9227166276300 | 4.03 | NPH | 3.0 | 2 | 700 | 16OCT2020 10:15 | Placebo for LY3819253 700 mg |
| 10031020 | 11835674757 | G9_11835674757_324020w_NG9.fastq.gz   | A27S    | 99.785 | 1859.0  | 2379.8406326034100 | 2.64 | NPH | 3.0 | 2 | 700 | 30OCT2020 12:50 | LY3819253 700mg IV           |
| 10031020 | 11835674757 | G9_11835674757_324020w_NG9.fastq.gz   | F342L   | 20.28  | 1001.0  | 2379.8406326034100 | 2.64 | NPH | 3.0 | 2 | 700 | 30OCT2020 12:50 | LY3819253 700mg IV           |
| 10031020 |             |                                       |         |        |         |                    |      |     |     |   |     |                 |                              |

|          |             |                                       |       |        |        |                    |      |     |     |   |     |                 |                              |
|----------|-------------|---------------------------------------|-------|--------|--------|--------------------|------|-----|-----|---|-----|-----------------|------------------------------|
| 10241003 | 11837827392 | G6_11837827392_324020w_NG6.fastq.gz   | T20I  | 99.872 | 3915.0 | 2552.543558282210  | 2.6  | NPH | 3.0 | 2 | 700 | 19OCT2020 11:17 | Placebo for LY3819253 700 mg |
| 10241003 | 11837827392 | G6_11837827392_324020w_NG6.fastq.gz   | D614G | 99.807 | 3101.0 | 2552.543558282210  | 2.6  | NPH | 3.0 | 2 | 700 | 19OCT2020 11:17 | Placebo for LY3819253 700 mg |
| 10421015 | 11821064975 | 19_11821064975_323284w_NB7.fastq.gz   | D614G | 100.0  | 610.0  | 712.8353365384620  | 5.59 | NPH | 3.0 | 2 | 700 | 06NOV2020 08:09 | Placebo for LY3819253 700 mg |
| 10111004 | 11837822214 | 63_11837822214_323284w_NF3.fastq.gz   | D614G | 99.815 | 540.0  | 659.3980463980460  | 5.54 | NPH | 3.0 | 2 | 700 | 19NOV2020 11:10 | Placebo for LY3819253 700 mg |
| 10691001 | 11802103494 | 23_11802103494_323284w_NB11.fastq.gz  | D614G | 99.76  | 835.0  | 1105.1337423312900 | 3.01 | NPH | 3.0 | 2 | 700 | 09NOV2020 09:10 | Placebo for LY3819253 700 mg |
| 10441001 | 11854608905 | 37_11854608905_323284w_ND1.fastq.gz   | T20I  | 100.0  | 1798.0 | 656.9290953545230  | 3.66 | NPH | 3.0 | 2 | 700 | 13NOV2020 11:20 | Placebo for LY3819253 700 mg |
| 10441001 | 11854608905 | 37_11854608905_323284w_ND1.fastq.gz   | D614G | 99.828 | 581.0  | 656.9290953545230  | 3.66 | NPH | 3.0 | 2 | 700 | 13NOV2020 11:20 | Placebo for LY3819253 700 mg |
| 10441001 | 11854608905 | 37_11854608905_323284w_ND1.fastq.gz   | A626V | 100.0  | 568.0  | 656.9290953545230  | 3.66 | NPH | 3.0 | 2 | 700 | 13NOV2020 11:20 | Placebo for LY3819253 700 mg |
| 10151002 | 11800016640 | 65_11800016640_323284w_NF5.fastq.gz   | D614G | 100.0  | 833.0  | 1153.4220858895700 | 2.84 | NPH | 3.0 | 2 | 700 | 19OCT2020 09:26 | Placebo for LY3819253 700 mg |
| 10141003 | 11806307911 | 66_11806307911_323284w_NF6.fastq.gz   | D138Y | 99.924 | 1324.0 | 1423.0416156670700 | 3.94 | NPH | 3.0 | 2 | 700 | 23OCT2020 09:32 | LY3819253 700mg IV           |
| 10141003 | 11806307911 | 66_11806307911_323284w_NF6.fastq.gz   | D614G | 99.908 | 1091.0 | 1423.0416156670700 | 3.94 | NPH | 3.0 | 2 | 700 | 23OCT2020 09:32 | LY3819253 700mg IV           |
| 10991001 | 11814711631 | 54_11814711631_323284w_NE6.fastq.gz   | D614G | 100.0  | 580.0  | 784.51115995116000 | 3.36 | NPH | 3.0 | 2 | 700 | 18NOV2020 09:20 | LY3819253 700mg IV           |
| 10371004 | 11833579779 | 6_11833579779_323284w_NA6.fastq.gz    | D614G | 100.0  | 963.0  | 1260.455205811140  | 3.55 | NPH | 3.0 | 2 | 700 | 05NOV2020 11:00 | Placebo for LY3819253 700 mg |
| 10311005 | 11839924746 | 80_11839924746_323284w_NG8.fastq.gz   | D614G | 99.844 | 1279.0 | 1548.3667481662600 | 4.46 | NPH | 3.0 | 2 | 700 | 26OCT2020 15:16 | Placebo for LY3819253 700 mg |
| 10311005 | 11839924746 | 80_11839924746_323284w_NG8.fastq.gz   | P681H | 99.9   | 1003.0 | 1548.3667481662600 | 4.46 | NPH | 3.0 | 2 | 700 | 26OCT2020 15:16 | Placebo for LY3819253 700 mg |
| 10371005 | 11833580299 | 7_11833580299_323284w_NA7.fastq.gz    | D614G | 100.0  | 429.0  | 503.2911084043850  | 2.98 | NPH | 3.0 | 2 | 700 | 05NOV2020 10:45 | LY3819253 700mg IV           |
| 10371005 | 11833580299 | 7_11833580299_323284w_NA7.fastq.gz    | K814T | 100.0  | 1.0    | 503.2911084043850  | 2.98 | NPH | 3.0 | 2 | 700 | 05NOV2020 10:45 | LY3819253 700mg IV           |
| 10291005 | 11833631561 | 8_11833631561_323284w_NA8.fastq.gz    | D80Y  | 100.0  | 1269.0 | 905.1404761904760  | 3.42 | NPH | 3.0 | 2 | 700 | 05NOV2020 11:44 | Placebo for LY3819253 700 mg |
| 10291005 | 11833631561 | 8_11833631561_323284w_NA8.fastq.gz    | D614G | 99.858 | 704.0  | 905.1404761904760  | 3.42 | NPH | 3.0 | 2 | 700 | 05NOV2020 11:44 | Placebo for LY3819253 700 mg |
| 10291005 | 11833631561 | 8_11833631561_323284w_NA8.fastq.gz    | P681H | 100.0  | 509.0  | 905.1404761904760  | 3.42 | NPH | 3.0 | 2 | 700 | 05NOV2020 11:44 | Placebo for LY3819253 700 mg |
| 10261032 | 11814751041 | 41_11814751041_323284w_ND5.fastq.gz   | D614G | 100.0  | 645.0  | 901.7088915956150  | 5.92 | NPH | 3.0 | 2 | 700 | 15NOV2020 10:23 | Placebo for LY3819253 700 mg |
| 10491004 | 11852526342 | 10_11852526342_323284w_NA10.fastq.gz  | D614G | 100.0  | 424.0  | 543.0675675675680  | 3.46 | NPH | 3.0 | 2 | 700 | 06NOV2020 11:04 | Placebo for LY3819253 700 mg |
| 10951001 | 11804224142 | 21_11804224142_323284w_NB9.fastq.gz   | D614G | 99.817 | 547.0  | 661.3219512195120  | 3.82 | NPH | 3.0 | 2 | 700 | 09NOV2020 10:35 | LY3819253 700mg IV           |
| 10441002 | 11854608907 | 44_11854608907_323284w_ND8.fastq.gz   | T20I  | 99.969 | 3263.0 | 914.3857493857490  | 2.48 | NPH | 3.0 | 2 | 700 | 16NOV2020 11:36 | LY3819253 700mg IV           |
| 10441002 | 11854608907 | 44_11854608907_323284w_ND8.fastq.gz   | D614G | 99.861 | 721.0  | 914.3857493857490  | 2.48 | NPH | 3.0 | 2 | 700 | 16NOV2020 11:36 | LY3819253 700mg IV           |
| 10441002 | 11854608907 | 44_11854608907_323284w_ND8.fastq.gz   | A626V | 100.0  | 743.0  | 914.3857493857490  | 2.48 | NPH | 3.0 | 2 | 700 | 16NOV2020 11:36 | LY3819253 700mg IV           |
| 10951002 | 11804224140 | 32_11804224140_323284w_NC8.fastq.gz   | D614G | 100.0  | 1004.0 | 1303.052503052500  | 5.38 | NPH | 3.0 | 2 | 700 | 12NOV2020 07:35 | LY3819253 700mg IV           |
| 10251007 | 11820978437 | 87_11820978437_323284w_NH3.fastq.gz   | D614G | 100.0  | 395.0  | 508.69395017793600 | 6.18 | NPH | 3.0 | 2 | 700 | 23OCT2020 09:12 | Placebo for LY3819253 700 mg |
| 10371007 | 11833647360 | 30_11833647360_323284w_NC6.fastq.gz   | T20I  | 99.956 | 4510.0 | 1437.1745454545500 | 3.38 | NPH | 3.0 | 2 | 700 | 10NOV2020 11:05 | Placebo for LY3819253 700 mg |
| 10371007 | 11833647360 | 30_11833647360_323284w_NC6.fastq.gz   | D614G | 99.805 | 1025.0 | 1437.1745454545500 | 3.38 | NPH | 3.0 | 2 | 700 | 10NOV2020 11:05 | Placebo for LY3819253 700 mg |
| 10201010 | 11837837312 | 77_11837837312_323284w_NG5.fastq.gz   | D614G | 99.861 | 717.0  | 831.8644688644690  | 4.97 | NPH | 3.0 | 2 | 700 | 23OCT2020 09:28 | Placebo for LY3819253 700 mg |
| 10291007 | 11833629507 | 60_11833629507_323284w_NE12.fastq.gz  | D614G | 100.0  | 1174.0 | 1460.7655677655700 | 4.72 | NAS | 3.0 | 2 | 700 | 09NOV2020 09:55 | LY3819253 700mg IV           |
| 10051004 | 11835722061 | 43_11835722061_323555w_BD7.fastq.gz   | D138H | 99.801 | 2012.0 | 2200.6861313868600 | 5.93 | NPH | 3.0 | 2 | 700 | 23OCT2020 09:41 | LY3819253 700mg IV           |
| 10051004 | 11835722061 | 43_11835722061_323555w_BD7.fastq.gz   | D614G | 99.883 | 1704.0 | 2200.6861313868600 | 5.93 | NPH | 3.0 | 2 | 700 | 23OCT2020 09:41 | LY3819253 700mg IV           |
| 10021004 | 11833557067 | 48_11833557067_323555w_BD12.fastq.gz  | S254F | 99.86  | 1430.0 | 1781.593220338980  | 3.45 | NAS | 3.0 | 2 | 700 | 22OCT2020 10:36 | LY3819253 700mg IV           |
| 10021004 | 11833557067 | 48_11833557067_323555w_BD12.fastq.gz  | E484K | 75.816 | 1501.0 | 1781.593220338980  | 3.45 | NAS | 3.0 | 2 | 700 | 22OCT2020 10:36 | LY3819253 700mg IV           |
| 10021004 | 11833557067 | 48_11833557067_323555w_BD12.fastq.gz  | E484Q | 21.985 | 1501.0 | 1781.593220338980  | 3.45 | NAS | 3.0 | 2 | 700 | 22OCT2020 10:36 | LY3819253 700mg IV           |
| 10021004 | 11833557067 | 48_11833557067_323555w_BD12.fastq.gz  | D614G | 99.918 | 1219.0 | 1781.593220338980  | 3.45 | NAS | 3.0 | 2 | 700 | 22OCT2020 10:36 | LY3819253 700mg IV           |
| 10021004 | 11833557067 | 48_11833557067_323555w_BD12.fastq.gz  | K814N | 50.0   | 2.0    | 1781.593220338980  | 3.45 | NAS | 3.0 | 2 | 700 | 22OCT2020 10:36 | LY3819253 700mg IV           |
| 10051005 | 11835723599 | 6_11835723599_323555w_BA6.fastq.gz    | D614G | 99.905 | 2099.0 | 3627.216808769790  | 5.94 | NAS | 3.0 | 2 | 700 | 30OCT2020 10:15 | LY3819253 700mg IV           |
| 10201014 | 11818961344 | 295_11818961344_323348w_NG11.fastq.gz | D614G | 99.939 | 1648.0 | 2653.987922705310  | 2.21 | NPH | 3.0 | 2 | 700 | 02NOV2020 08:01 | Placebo for LY3819253 700 mg |
| 10041006 | 11802101517 | 163_11802101517_323348w_NF1.fastq.gz  | D614G | 99.87  | 768.0  | 1278.45584725537   | 2.65 | NPH | 3.0 | 2 | 700 | 16NOV2020 11:38 | LY3819253 700mg IV           |
| 10201013 | 11818963146 | 296_11818963146_323348w_NG12.fastq.gz | D614G | 95.987 | 299.0  | 543.1451247165530  | 2.42 | NPH | 3.0 | 2 | 700 | 02NOV2020 09:55 | LY3819253 700mg IV           |
| 10201016 | 11818961088 | 13_11818961088_323348w_NA5.fastq.gz   | D614G | 99.784 | 462.0  | 808.7858880778590  | 2.01 | NPH | 3.0 | 2 | 700 | 05NOV2020 08:35 | Placebo for LY3819253 700 mg |
| 10331004 | 11839860298 | 255_11839860298_323348w_NG4.fastq.gz  | D614G | 99.882 | 846.0  | 1445.9615384615400 | 2.53 | NPH | 3.0 | 2 | 700 | 26OCT2020 09:54 | LY3819253 700mg IV           |
| 10661001 | 11833576590 | 27_11833576590_323163w_NC3.fastq.gz   | D614G | 100.0  | 1079.0 | 1375.7912087912100 | 5.04 | NPH | 3.0 | 2 | 700 | 12NOV2020 14:35 | Placebo for LY3819253 700 mg |
| 10661001 | 11833576590 | 27_11833576590_323163w_NC3.fastq.gz   | R815S | 25.0   | 4.0    | 1375.7912087912100 | 5.04 | NPH | 3.0 | 2 | 700 | 12NOV2020 14:35 | Placebo for LY3819253 700 mg |
| 10411001 | 11835726660 | C3_11835726660_324017w_AH3.fastq.gz   | F32L  | 99.877 | 6480.0 | 3207.3736263736300 | 4.38 | NPH | 3.0 | 2 | 700 | 09NOV2020 12:00 | Placebo for LY3819253 700 mg |
| 10411001 | 11835726660 | C3_11835726660_324017w_AH3.fastq.gz   | P251S | 99.848 | 1970.0 | 3207.3736263736300 | 4.38 | NPH | 3.0 | 2 | 700 | 09NOV2020 12:00 | Placebo for LY3819253 700 mg |
| 10411001 | 11835726660 | C3_11835726660_324017w_AH3.fastq.gz   | D614G | 99.797 | 1972.0 | 3207.3736263736300 | 4.38 | NPH | 3.0 | 2 | 700 | 09NOV2020 12:00 | Placebo for LY3819253 700 mg |
| 10051004 | 11835722062 | C8_11835722062_324017w_AH8.fastq.gz   | D138H | 99.828 | 1166.0 | 1987.7214111922100 | 4.22 | NAS | 3.0 | 2 | 700 | 23OCT2020 09:41 | LY3819253 700mg IV           |
| 10051004 | 11835722062 | C8_11835722062_324017w_AH8.fastq.gz   | D614G | 99.755 | 1226.0 | 1987.7214111922100 | 4.22 | NAS | 3.0 | 2 | 700 | 23OCT2020 09:41 | LY3819253 700mg IV           |
| 10421011 | 11818943495 | A10_11818943495_324017w_AF10.fastq.gz | D614G | 99.894 | 1889.0 | 3583.41162514828   | 3.81 | NPH | 3.0 | 2 | 700 | 02NOV2020 12:41 | Placebo for LY3819253 700 mg |
| 10891004 | 11808470723 | F4_11808470723_323524w_BF4.fastq.gz   | D614G | 100.0  | 1026.0 | 1352.2156862745100 | 3.67 | NPH | 3.0 | 2 | 700 | 16NOV2020 13:40 | LY3819253 700mg IV           |
| 10891007 | 11808472776 | G4_11808472776_323524w_BG4.fastq.gz   | D614G | 100.0  | 939.0  | 1320.8498789346200 | 3.87 | NPH | 3.0 | 2 | 700 | 19NOV2020 08:36 | Placebo for LY3819253 700 mg |
| 10061007 | 11804259910 | D5_11804259910_323524w_BD5.fastq.gz   | D614G | 99.91  | 1110.0 | 1221.2447980416200 | 5.7  | NPH | 3.0 | 2 | 700 | 11NOV2020 15:19 | Placebo for LY3819253 700 mg |
| 10021007 | 11833557576 | D11_11833557576_323524w_BD11.fastq.gz | D614G | 99.812 | 1066.0 | 1418.939024390240  | 4.74 | NPH | 3.0 | 2 | 700 | 06NOV2020 11:34 | LY3819253 700mg IV           |
| 10051009 | 11835657550 | D10_11835657550_323524w_BD10.fastq.gz | D614G | 99.883 | 854.0  | 1216.6308068459700 | 6.39 | NPH | 3.0 | 2 | 700 | 16NOV2020 13:50 | LY3819253 700mg IV           |
| 10261030 | 11814709581 | E8_11814709581_323524w_BE8.fastq.gz   | L5F   | 99.933 | 4447.0 | 1070.4983498349800 | 8.65 | NPH | 3.0 | 2 | 700 | 07NOV2020 10:16 | LY3819253 700mg IV           |
| 10261030 | 11814709581 | E8_11814709581_323524w_BE8.fastq.gz   | D614G | 99.785 | 932.0  | 1070.4983498349800 | 8.65 | NPH | 3.0 | 2 | 700 | 07NOV2020 10:16 | LY3819253 700mg IV           |
| 10291008 | 11833629762 | F2_11833629762_323524w_BF2.fastq.gz   | D614G | 100.0  | 777.0  | 1030.5325953259500 | 2.78 | NPH | 3.0 | 2 | 700 | 13NOV2020 10:27 | LY3819253 700mg IV           |
| 10131010 | 11810486474 | D4_11810486474_323524w_BD4.fastq.gz   | D111N | 99.693 | 978.0  | 1128.581707317070  | 6.6  | NAS | 3.0 | 2 | 700 | 12NOV2020 12:51 | Placebo for LY3819253 700 mg |
| 10131010 | 11810486474 | D4_11810486474_323524w_BD4.fastq.gz   | D614G | 100.0  | 838.0  | 1128.581707317070  | 6.6  | NAS | 3.0 | 2 | 700 | 12NOV2020 12:51 | Placebo for LY3819253 700 mg |
| 10131010 | 11810486474 | D4_11810486474_323524w_BD4.fastq.gz   | T732A | 99.643 | 561.0  | 1128.581707317070  | 6.6  | NAS | 3.0 | 2 |     |                 |                              |

|          |             |                                       |       |        |        |                    |      |     |     |   |     |                 |                              |
|----------|-------------|---------------------------------------|-------|--------|--------|--------------------|------|-----|-----|---|-----|-----------------|------------------------------|
| 10061009 | 11804262215 | D7_11804262215_323524w_BD7.fastq.gz   | D614G | 99.868 | 759.0  | 1072.391143911440  | 4.97 | NPH | 3.0 | 2 | 700 | 13NOV2020 13:36 | Placebo for LY3819253 700 mg |
| 10261031 | 11814711620 | F3_11814711620_323524w_BF3.fastq.gz   | D614G | 100.0  | 2130.0 | 2485.558536585370  | 6.56 | NPH | 3.0 | 2 | 700 | 15NOV2020 11:01 | Placebo for LY3819253 700 mg |
| 10421018 | 11814709327 | G7_11814709327_323524w_BG7.fastq.gz   | D614G | 100.0  | 1093.0 | 1451.6593673965900 | 3.74 | NPH | 3.0 | 2 | 700 | 19NOV2020 08:41 | LY3819253 700mg IV           |
| 10421018 | 11814709327 | G7_11814709327_323524w_BG7.fastq.gz   | K814N | 50.0   | 2.0    | 1451.6593673965900 | 3.74 | NPH | 3.0 | 2 | 700 | 19NOV2020 08:41 | LY3819253 700mg IV           |
| 10421007 | 11850420738 | D12_11850420738_323524w_BD12.fastq.gz | D614G | 100.0  | 640.0  | 858.773607748184   | 4.3  | NPH | 3.0 | 2 | 700 | 19OCT2020 13:06 | Placebo for LY3819253 700 mg |
| 10011023 | 11818960584 | C6_11818960584_323524w_BC6.fastq.gz   | D614G | 99.893 | 936.0  | 1154.018270401950  | 6.33 | NAS | 3.0 | 2 | 700 | 16NOV2020 11:13 | Placebo for LY3819253 700 mg |
| 10561003 | 11839942464 | F8_11839942464_323524w_BF8.fastq.gz   | D614G | 99.9   | 1004.0 | 1254.4604141291100 | 6.19 | NPH | 3.0 | 2 | 700 | 29OCT2020 08:58 | Placebo for LY3819253 700 mg |
| 10421009 | 11821068046 | E1_11821068046_323524w_BE1.fastq.gz   | D614G | 99.6   | 750.0  | 836.6996336996340  | 5.42 | NPH | 3.0 | 2 | 700 | 26OCT2020 13:22 | Placebo for LY3819253 700 mg |
| 10201009 | 11850337035 | A6_11850337035_323524w_BA6.fastq.gz   | L5F   | 100.0  | 4319.0 | 1373.4926108374400 | 3.57 | NPH | 3.0 | 2 | 700 | 23OCT2020 08:48 | Placebo for LY3819253 700 mg |
| 10201009 | 11850337035 | A6_11850337035_323524w_BA6.fastq.gz   | D614G | 100.0  | 1028.0 | 1373.4926108374400 | 3.57 | NPH | 3.0 | 2 | 700 | 23OCT2020 08:48 | Placebo for LY3819253 700 mg |
| 10511010 | 11800032270 | B3_11800032270_323524w_BB3.fastq.gz   | D614G | 100.0  | 841.0  | 1051.940243902440  | 3.44 | NPH | 3.0 | 2 | 700 | 26OCT2020 09:47 | Placebo for LY3819253 700 mg |
| 10021005 | 11833556033 | A1_11833556033_323524w_BA1.fastq.gz   | D614G | 99.603 | 252.0  | 620.910209102091   | 5.01 | NPH | 3.0 | 2 | 700 | 22OCT2020 11:26 | LY3819253 700mg IV           |
| 10021004 | 11833555264 | A2_11833555264_323524w_BA2.fastq.gz   | S254F | 99.817 | 1092.0 | 1164.8878048780500 | 4.91 | NPH | 3.0 | 2 | 700 | 22OCT2020 10:36 | LY3819253 700mg IV           |
| 10021004 | 11833555264 | A2_11833555264_323524w_BA2.fastq.gz   | E484K | 97.067 | 1125.0 | 1164.8878048780500 | 4.91 | NPH | 3.0 | 2 | 700 | 22OCT2020 10:36 | LY3819253 700mg IV           |
| 10021004 | 11833555264 | A2_11833555264_323524w_BA2.fastq.gz   | D614G | 99.791 | 957.0  | 1164.8878048780500 | 4.91 | NPH | 3.0 | 2 | 700 | 22OCT2020 10:36 | LY3819253 700mg IV           |
| 10061008 | 11804195909 | D6_11804195909_323524w_BD6.fastq.gz   | D614G | 100.0  | 833.0  | 1171.6402439024400 | 3.03 | NPH | 3.0 | 2 | 700 | 13NOV2020 14:32 | LY3819253 700mg IV           |
| 10201008 | 11850339080 | A5_11850339080_323524w_BA5.fastq.gz   | D614G | 100.0  | 1099.0 | 1330.621951219510  | 5.44 | NPH | 3.0 | 2 | 700 | 22OCT2020 08:23 | LY3819253 700mg IV           |
| 10201008 | 11850339080 | A5_11850339080_323524w_BA5.fastq.gz   | P681R | 100.0  | 857.0  | 1330.621951219510  | 5.44 | NPH | 3.0 | 2 | 700 | 22OCT2020 08:23 | LY3819253 700mg IV           |
| 10031024 | 11852446670 | C3_11852446670_323524w_BC3.fastq.gz   | R21I  | 99.864 | 3672.0 | 1316.7924297924300 | 4.93 | NPH | 3.0 | 2 | 700 | 13NOV2020 08:57 | Placebo for LY3819253 700 mg |
| 10031024 | 11852446670 | C3_11852446670_323524w_BC3.fastq.gz   | D614G | 99.912 | 1141.0 | 1316.7924297924300 | 4.93 | NPH | 3.0 | 2 | 700 | 13NOV2020 08:57 | Placebo for LY3819253 700 mg |
| 10311011 | 11816778639 | H6_11816778639_323524w_BH6.fastq.gz   | D614G | 100.0  | 818.0  | 953.7647058823530  | 3.45 | NPH | 3.0 | 2 | 700 | 16NOV2020 10:01 | LY3819253 700mg IV           |
| 10311011 | 11816778639 | H6_11816778639_323524w_BH6.fastq.gz   | P681H | 100.0  | 569.0  | 953.7647058823530  | 3.45 | NPH | 3.0 | 2 | 700 | 16NOV2020 10:01 | LY3819253 700mg IV           |
| 10081003 | 11804201728 | B2_11804201728_323524w_BB2.fastq.gz   | D614G | 100.0  | 799.0  | 1002.838199513380  | 5.03 | NPH | 3.0 | 2 | 700 | 15OCT2020 12:46 | Placebo for LY3819253 700 mg |
| 10081003 | 11804201728 | B2_11804201728_323524w_BB2.fastq.gz   | K814N | 50.0   | 2.0    | 1002.838199513380  | 5.03 | NPH | 3.0 | 2 | 700 | 15OCT2020 12:46 | Placebo for LY3819253 700 mg |
| 10241006 | 11800011269 | D8_11800011269_323524w_BD8.fastq.gz   | D614G | 99.906 | 1060.0 | 1394.4447174447200 | 3.22 | NPH | 3.0 | 2 | 700 | 16NOV2020 09:42 | LY3819253 700mg IV           |
| 10131011 | 11810489793 | C12_11810489793_323524w_BC12.fastq.gz | D614G | 99.691 | 324.0  | 1073.0110159118700 | 3.97 | NPH | 3.0 | 2 | 700 | 12NOV2020 13:48 | Placebo for LY3819253 700 mg |
| 10131011 | 11810489793 | C12_11810489793_323524w_BC12.fastq.gz | K814N | 100.0  | 1.0    | 1073.0110159118700 | 3.97 | NPH | 3.0 | 2 | 700 | 12NOV2020 13:48 | Placebo for LY3819253 700 mg |
| 10041005 | 11802103566 | C2_11802103566_323524w_BC2.fastq.gz   | D614G | 100.0  | 1129.0 | 1369.1075794621000 | 5.76 | NPH | 3.0 | 2 | 700 | 02NOV2020 11:30 | Placebo for LY3819253 700 mg |
| 10561004 | 11839940417 | H2_11839940417_323524w_BH2.fastq.gz   | D614G | 99.669 | 905.0  | 1047.967113276490  | 7.11 | NPH | 3.0 | 2 | 700 | 29OCT2020 09:10 | Placebo for LY3819253 700 mg |
| 10031028 | 11821064966 | H8_11821064966_323524w_BH8.fastq.gz   | A222V | 100.0  | 873.0  | 1023.0427872860600 | 2.52 | NPH | 3.0 | 2 | 700 | 16NOV2020 13:59 | LY3819253 700mg IV           |
| 10031028 | 11821064966 | H8_11821064966_323524w_BH8.fastq.gz   | D614G | 100.0  | 835.0  | 1023.0427872860600 | 2.52 | NPH | 3.0 | 2 | 700 | 16NOV2020 13:59 | LY3819253 700mg IV           |
| 10371008 | 11810489547 | F1_11810489547_323524w_BF1.fastq.gz   | D614G | 99.703 | 674.0  | 866.4914634146340  | 6.95 | NPH | 3.0 | 2 | 700 | 13NOV2020 12:25 | Placebo for LY3819253 700 mg |
| 10371008 | 11810489547 | F1_11810489547_323524w_BF1.fastq.gz   | P681R | 99.395 | 496.0  | 866.4914634146340  | 6.95 | NPH | 3.0 | 2 | 700 | 13NOV2020 12:25 | Placebo for LY3819253 700 mg |
| 10491001 | 11852526341 | B9_11852526341_323524w_BB9.fastq.gz   | D614G | 99.907 | 1077.0 | 1230.8174418604700 | 7.29 | NPH | 3.0 | 2 | 700 | 30OCT2020 09:08 | Placebo for LY3819253 700 mg |
| 10491001 | 11852526341 | B9_11852526341_323524w_BB9.fastq.gz   | Y674F | 99.884 | 862.0  | 1230.8174418604700 | 7.29 | NPH | 3.0 | 2 | 700 | 30OCT2020 09:08 | Placebo for LY3819253 700 mg |
| 10561002 | 11839941185 | F7_11839941185_323524w_BF7.fastq.gz   | D614G | 99.899 | 994.0  | 1328.6944785276100 | 2.92 | NPH | 3.0 | 2 | 700 | 26OCT2020 16:08 | LY3819253 700mg IV           |
| 10561002 | 11839941185 | F7_11839941185_323524w_BF7.fastq.gz   | Q677H | 100.0  | 952.0  | 1328.6944785276100 | 2.92 | NPH | 3.0 | 2 | 700 | 26OCT2020 16:08 | LY3819253 700mg IV           |
| 10041008 | 11802104076 | D9_11802104076_323524w_BD9.fastq.gz   | D614G | 99.691 | 971.0  | 1214.7183271832700 | 4.28 | NPH | 3.0 | 2 | 700 | 18NOV2020 09:03 | Placebo for LY3819253 700 mg |
| 10031018 | 11835674764 | B1_11835674764_323524w_BB1.fastq.gz   | D614G | 100.0  | 661.0  | 871.4106925880920  | 6.05 | NPH | 3.0 | 2 | 700 | 26OCT2020 12:27 | Placebo for LY3819253 700 mg |
| 11061001 | 11820991565 | E4_11820991565_323524w_BE4.fastq.gz   | D614G | 99.935 | 1545.0 | 2165.4596577017100 | 3.85 | NPH | 3.0 | 2 | 700 | 06NOV2020 14:00 | LY3819253 700mg IV           |
| 10891006 | 11808470731 | G3_11808470731_323524w_BG3.fastq.gz   | A222V | 99.611 | 1287.0 | 1391.2646341463400 | 6.24 | NPH | 3.0 | 2 | 700 | 19NOV2020 09:23 | LY3819253 700mg IV           |
| 10891006 | 11808470731 | G3_11808470731_323524w_BG3.fastq.gz   | D614G | 100.0  | 1133.0 | 1391.2646341463400 | 6.24 | NPH | 3.0 | 2 | 700 | 19NOV2020 09:23 | LY3819253 700mg IV           |
| 10891006 | 11808470731 | G3_11808470731_323524w_BG3.fastq.gz   | K776E | 21.962 | 1152.0 | 1391.2646341463400 | 6.24 | NPH | 3.0 | 2 | 700 | 19NOV2020 09:23 | LY3819253 700mg IV           |
| 10411004 | 11835726670 | 54_11835726670_323232w_AE6.fastq.gz   | F32L  | 99.878 | 5749.0 | 1883.820731707320  | 4.25 | NPH | 3.0 | 2 | 700 | 19NOV2020 11:03 | LY3819253 700mg IV           |
| 10411004 | 11835726670 | 54_11835726670_323232w_AE6.fastq.gz   | P251S | 100.0  | 1759.0 | 1883.820731707320  | 4.25 | NPH | 3.0 | 2 | 700 | 19NOV2020 11:03 | LY3819253 700mg IV           |
| 10411004 | 11835726670 | 54_11835726670_323232w_AE6.fastq.gz   | D614G | 99.694 | 1634.0 | 1883.820731707320  | 4.25 | NPH | 3.0 | 2 | 700 | 19NOV2020 11:03 | LY3819253 700mg IV           |
| 10411004 | 11835726670 | 54_11835726670_323232w_AE6.fastq.gz   | K814N | 33.333 | 3.0    | 1883.820731707320  | 4.25 | NPH | 3.0 | 2 | 700 | 19NOV2020 11:03 | LY3819253 700mg IV           |
| 10411004 | 11835726670 | 54_11835726670_323232w_AE6.fastq.gz   | K814I | 33.333 | 3.0    | 1883.820731707320  | 4.25 | NPH | 3.0 | 2 | 700 | 19NOV2020 11:03 | LY3819253 700mg IV           |
| 10421012 | 11821062151 | 16_11821062151_323232w_AB4.fastq.gz   | E191K | 24.926 | 3057.0 | 3298.5815950920200 | 3.29 | NPH | 3.0 | 2 | 700 | 03NOV2020 11:11 | LY3819253 700mg IV           |
| 10421012 | 11821062151 | 16_11821062151_323232w_AB4.fastq.gz   | D614G | 99.962 | 2654.0 | 3298.5815950920200 | 3.29 | NPH | 3.0 | 2 | 700 | 03NOV2020 11:11 | LY3819253 700mg IV           |
| 10371009 | 11810488776 | 30_11810488776_323232w_AC6.fastq.gz   | D614G | 99.915 | 3542.0 | 4179.865525672370  | 4.89 | NPH | 3.0 | 2 | 700 | 19NOV2020 09:05 | Placebo for LY3819253 700 mg |
| 10371009 | 11810488776 | 30_11810488776_323232w_AC6.fastq.gz   | P681R | 99.7   | 2665.0 | 4179.865525672370  | 4.89 | NPH | 3.0 | 2 | 700 | 19NOV2020 09:05 | Placebo for LY3819253 700 mg |
| 10561005 | 11839941194 | 44_11839941194_323232w_AD8.fastq.gz   | D614G | 99.889 | 3598.0 | 4211.360195360200  | 4.72 | NPH | 3.0 | 2 | 700 | 30OCT2020 12:18 | Placebo for LY3819253 700 mg |
| 10421014 | 11818963138 | 2_11818963138_323232w_AA2.fastq.gz    | D614G | 99.927 | 2736.0 | 3369.01466992665   | 4.63 | NPH | 3.0 | 2 | 700 | 06NOV2020 09:56 | Placebo for LY3819253 700 mg |
| 10021008 | 11833557066 | 77_11833557066_323232w_AG5.fastq.gz   | D138Y | 99.78  | 1363.0 | 1583.1660561660600 | 2.58 | NPH | 3.0 | 2 | 700 | 16NOV2020 09:27 | LY3819253 700mg IV           |
| 10021008 | 11833557066 | 77_11833557066_323232w_AG5.fastq.gz   | D614G | 99.838 | 1233.0 | 1583.1660561660600 | 2.58 | NPH | 3.0 | 2 | 700 | 16NOV2020 09:27 | LY3819253 700mg IV           |
| 10561006 | 11812650826 | 48_11812650826_323232w_AD12.fastq.gz  | S477N | 99.953 | 2146.0 | 2175.6159509202500 | 2.49 | NPH | 3.0 | 2 | 700 | 09NOV2020 10:58 | LY3819253 700mg IV           |
| 10561006 | 11812650826 | 48_11812650826_323232w_AD12.fastq.gz  | D614G | 99.826 | 1727.0 | 2175.6159509202500 | 2.49 | NPH | 3.0 | 2 | 700 | 09NOV2020 10:58 | LY3819253 700mg IV           |
| 10031025 | 11856712845 | 60_11856712845_323232w_AE12.fastq.gz  | D614G | 99.941 | 1682.0 | 2206.7396593674000 | 2.7  | NAS | 3.0 | 2 | 700 | 13NOV2020 12:18 | LY3819253 700mg IV           |
| 10201007 | 11850337033 | F8_37033_322773w_NF8.fastq.gz         | T393R | 100.0  | 1.0    | 4077.470588235290  | 4.77 | NPH | 3.0 | 2 | 700 | 19OCT2020 07:48 | LY3819253 700mg IV           |
| 10201007 | 11850337033 | F8_37033_322773w_NF8.fastq.gz         | D614G | 99.845 | 3219.0 | 4077.470588235290  | 4.77 | NPH | 3.0 | 2 | 700 | 19OCT2020 07:48 | LY3819253 700mg IV           |
| 10201007 | 11850337033 | F8_37033_322773w_NF8.fastq.gz         | P681R | 99.534 | 2573.0 | 4077.470588235290  | 4.77 | NPH | 3.0 | 2 | 700 | 19OCT2020 07:48 | LY3819253 700mg IV           |
| 10251006 | 11850335749 | F6_35749_322773w_NF6.fastq.gz         | D614G | 99.798 | 2975.0 | 4016.3690476190500 | 5.79 | NPH | 3.0 | 2 | 700 | 19OCT2020 09:08 | Placebo for LY3819253 700 mg |
| 10031017 | 11835672718 | 19_72718_322851w_CB7.fastq.gz         | D614G | 99.905 | 1056.0 | 1609.948780487810  | 2.28 | NPH | 3.0 | 2 | 700 | 26OCT2020 11:38 | Placebo for LY3819253 700 mg |
| 10031017 | 11835672718 |                                       |       |        |        |                    |      |     |     |   |     |                 |                              |

|          |             |                                       |       |        |        |                    |      |     |     |   |     |                 |                              |                    |
|----------|-------------|---------------------------------------|-------|--------|--------|--------------------|------|-----|-----|---|-----|-----------------|------------------------------|--------------------|
| 10011016 | 11852514884 | 36_14884_322851w_CC12.fastq.gz        | L212S | 99.854 | 683.0  | 749.0305997552020  | 2.73 | NPH | 3.0 | 2 | 700 | 02NOV2020 15:19 | Placebo for LY3819253 700 mg |                    |
| 10011016 | 11852514884 | 36_14884_322851w_CC12.fastq.gz        | D614G | 99.824 | 568.0  | 749.0305997552020  | 2.73 | NPH | 3.0 | 2 | 700 | 02NOV2020 15:19 | Placebo for LY3819253 700 mg |                    |
| 10021006 | 11833555530 | 48_55530_322851w_CD12.fastq.gz        | D614G | 99.91  | 1113.0 | 1462.405172413790  | 2.42 | NPH | 3.0 | 2 | 700 | 02NOV2020 10:21 | Placebo for LY3819253 700 mg |                    |
| 10011018 | 11816795591 | 2_95591_322847w_BA2.fastq.gz          | D614G | 99.932 | 1467.0 | 1812.8288508557500 | 4.76 | NPH | 3.0 | 2 | 700 | 06NOV2020 09:17 | Placebo for LY3819253 700 mg |                    |
| 10051008 | 11835724103 | 39_24103_322847w_BD3.fastq.gz         | D614G | 99.657 | 1165.0 | 1490.2616136919300 | 5.69 | NPH | 3.0 | 2 | 700 | 09NOV2020 10:35 | Placebo for LY3819253 700 mg |                    |
| 10111002 | 11837818639 | 3_18639_322847w_BA3.fastq.gz          | D614G | 99.928 | 1395.0 | 1801.6992753623200 | 2.85 | NPH | 3.0 | 2 | 700 | 05NOV2020 09:39 | LY3819253 700mg IV           |                    |
| 10311004 | 11839924233 | 51_24233_322847w_BE3.fastq.gz         | D614G | 99.914 | 1168.0 | 1491.421375921380  | 2.82 | NPH | 3.0 | 2 | 700 | 19OCT2020 12:23 | LY3819253 700mg IV           |                    |
| 10121005 | 11804197194 | 68_97194_322847w_BF8.fastq.gz         | D614G | 99.751 | 2009.0 | 2106.8706411698500 | 8.15 | NPH | 3.0 | 2 | 700 | 23OCT2020 14:25 | Placebo for LY3819253 700 mg |                    |
| 10031021 | 11835674765 | 13_74765_322847w_BB1.fastq.gz         | D614G | 99.825 | 1143.0 | 1341.959090909090  | 8.32 | NPH | 3.0 | 2 | 700 | 06NOV2020 10:35 | Placebo for LY3819253 700 mg |                    |
| 10031021 | 11835674765 | 13_74765_322847w_BB1.fastq.gz         | D867E | 100.0  | 1.0    | 1341.959090909090  | 8.32 | NPH | 3.0 | 2 | 700 | 06NOV2020 10:35 | Placebo for LY3819253 700 mg |                    |
| 10121008 | 11804196162 | 4_11804196162_323283w_CD3.fastq.gz    | S477N | 100.0  | 751.0  | 882.0622710622710  | 6.68 | NPH | 3.0 | 2 | 700 | 09NOV2020 11:20 | LY3819253 700mg IV           |                    |
| 10121008 | 11804196162 | 4_11804196162_323283w_CD3.fastq.gz    | D614G | 100.0  | 584.0  | 882.0622710622710  | 6.68 | NPH | 3.0 | 2 | 700 | 09NOV2020 11:20 | LY3819253 700mg IV           |                    |
| 10661002 | 11833576591 | D4_11833576591_324019w_CD4.fastq.gz   | D614G | 99.619 | 1573.0 | 2233.3530805687200 | 6.87 | NPH | 3.0 | 2 | 700 | 16NOV2020 14:30 | LY3819253 700mg IV           |                    |
| 10221006 | 11839869196 | G6_11839869196_324019w_CG6.fastq.gz   | S13I  | 99.902 | 6118.0 | 2204.429963459200  | 3.21 | NAS | 3.0 | 2 | 700 | 30OCT2020 07:53 | LY3819253 700mg IV           |                    |
| 10221006 | 11839869196 | G6_11839869196_324019w_CG6.fastq.gz   | W152C | 99.633 | 1364.0 | 2204.429963459200  | 3.21 | NAS | 3.0 | 2 | 700 | 30OCT2020 07:53 | LY3819253 700mg IV           |                    |
| 10221006 | 11839869196 | G6_11839869196_324019w_CG6.fastq.gz   | L452R | 88.798 | 1464.0 | 2204.429963459200  | 3.21 | NAS | 3.0 | 2 | 700 | 30OCT2020 07:53 | LY3819253 700mg IV           |                    |
| 10221006 | 11839869196 | G6_11839869196_324019w_CG6.fastq.gz   | D614G | 99.912 | 1142.0 | 2204.429963459200  | 3.21 | NAS | 3.0 | 2 | 700 | 30OCT2020 07:53 | LY3819253 700mg IV           |                    |
| 10221004 | 11839868941 | 1_11839868941_323283w_CD11.fastq.gz   | P82S  | 99.674 | 919.0  | 785.0227790432800  | 5.6  | NPH | 3.0 | 2 | 700 | 19OCT2020 10:27 | Placebo for LY3819253 700 mg |                    |
| 10221004 | 11839868941 | 1_11839868941_323283w_CD11.fastq.gz   | D614G | 100.0  | 697.0  | 785.0227790432800  | 5.6  | NPH | 3.0 | 2 | 700 | 19OCT2020 10:27 | Placebo for LY3819253 700 mg |                    |
| 10221004 | 11839868941 | 1_11839868941_323283w_CD11.fastq.gz   | I720V | 100.0  | 536.0  | 785.0227790432800  | 5.6  | NPH | 3.0 | 2 | 700 | 19OCT2020 10:27 | Placebo for LY3819253 700 mg |                    |
| 10051005 | 11835722308 | 38_11835722308_323283w_CG12.fastq.gz  | D614G | 100.0  | 649.0  | 796.612293144208   | 6.97 | NPH | 3.0 | 2 | 700 | 30OCT2020 10:15 | LY3819253 700mg IV           |                    |
| 10201015 | 11818961099 | 26_11818961099_323283w_CF12.fastq.gz  | D614G | 100.0  | 472.0  | 648.4088127294980  | 2.29 | NPH | 3.0 | 2 | 700 | 02NOV2020 12:02 | LY3819253 700mg IV           |                    |
| 10291002 | 11833628744 | 32_11833628744_323283w_CG6.fastq.gz   | D614G | 99.897 | 967.0  | 1219.2112332112300 | 2.52 | NPH | 3.0 | 2 | 700 | 29OCT2020 10:05 | LY3819253 700mg IV           |                    |
| 10051006 | 11835659343 | 37_11835659343_323283w_CG11.fastq.gz  | D614G | 99.931 | 1458.0 | 1602.1809290953500 | 4.93 | NPH | 3.0 | 2 | 700 | 30OCT2020 10:08 | LY3819253 700mg IV           |                    |
| 10171004 | 11833638152 | 16_11833638152_323283w_CF2.fastq.gz   | D614G | 99.868 | 756.0  | 965.6764346764350  | 3.65 | NPH | 3.0 | 2 | 700 | 30OCT2020 13:18 | LY3819253 700mg IV           |                    |
| 10221003 | 11839869191 | 6_11839869191_323283w_CE4.fastq.gz    | P82S  | 99.689 | 644.0  | 547.4664224664230  | 5.18 | NPH | 3.0 | 2 | 700 | 19OCT2020 10:11 | Placebo for LY3819253 700 mg |                    |
| 10221003 | 11839869191 | 6_11839869191_323283w_CE4.fastq.gz    | D614G | 100.0  | 439.0  | 547.4664224664230  | 5.18 | NPH | 3.0 | 2 | 700 | 19OCT2020 10:11 | Placebo for LY3819253 700 mg |                    |
| 10221003 | 11839869191 | 6_11839869191_323283w_CE4.fastq.gz    | I720V | 100.0  | 346.0  | 547.4664224664230  | 5.18 | NPH | 3.0 | 2 | 700 | 19OCT2020 10:11 | Placebo for LY3819253 700 mg |                    |
| 10221005 | 11839868678 | 4_11839868678_323283w_CE2.fastq.gz    | D614G | 99.793 | 484.0  | 596.9387254901960  | 2.81 | NPH | 3.0 | 2 | 700 | 26OCT2020 09:43 | Placebo for LY3819253 700 mg |                    |
| 10221005 | 11839868678 | 4_11839868678_323283w_CE2.fastq.gz    | T732A | 100.0  | 279.0  | 596.9387254901960  | 2.81 | NPH | 3.0 | 2 | 700 | 26OCT2020 09:43 | Placebo for LY3819253 700 mg |                    |
| 10221005 | 11839868678 | 4_11839868678_323283w_CE2.fastq.gz    | N764K | 23.333 | 120.0  | 596.9387254901960  | 2.81 | NPH | 3.0 | 2 | 700 | 26OCT2020 09:43 | Placebo for LY3819253 700 mg |                    |
| 10161005 | 11852509454 | 40_11852509454_323283w_CH2.fastq.gz   | D614G | 99.788 | 471.0  | 546.6270783847980  | 5.82 | NPH | 3.0 | 2 | 700 | 02NOV2020 12:06 | Placebo for LY3819253 700 mg |                    |
| 10121007 | 11804196426 | 47_11804196426_323283w_CH9.fastq.gz   | D614G | 99.821 | 559.0  | 680.3850855745720  | 4.7  | NPH | 3.0 | 2 | 700 | 05NOV2020 12:52 | Placebo for LY3819253 700 mg |                    |
| 10121007 | 11804196426 | 47_11804196426_323283w_CH9.fastq.gz   | T732A | 99.824 | 569.0  | 680.3850855745720  | 4.7  | NPH | 3.0 | 2 | 700 | 05NOV2020 12:52 | Placebo for LY3819253 700 mg |                    |
| 10371001 | 11833581571 | 45_11833581571_323283w_CH7.fastq.gz   | D614G | 99.623 | 531.0  | 662.4878048780490  | 5.23 | NPH | 3.0 | 2 | 700 | 02NOV2020 12:15 | LY3819253 700mg IV           |                    |
| 10261027 | 11823099918 | 33_11823099918_323283w_CG7.fastq.gz   | D614G | 99.441 | 716.0  | 1038.492082825820  | 2.5  | NPH | 3.0 | 2 | 700 | 29OCT2020 10:30 | LY3819253 700mg IV           |                    |
| 10951003 | 11808472779 | A4_11808472779_323690w_BA4.fastq.gz   | D614G | 99.763 | 1265.0 | 1578.5325953259500 | 2.03 | NPH | 3.0 | 2 | 700 | 16NOV2020 08:20 | Placebo for LY3819253 700 mg |                    |
| 10291007 | 11833631552 | B8_11833631552_323690w_BB8.fastq.gz   | H66Q  | 38.113 | 4972.0 | 3234.235294117650  | 2.28 | NPH | 3.0 | 2 | 700 | 09NOV2020 09:56 | LY3819253 700mg IV           |                    |
| 10291007 | 11833631552 | B8_11833631552_323690w_BB8.fastq.gz   | Y279N | 34.312 | 2827.0 | 3234.235294117650  | 2.28 | NPH | 3.0 | 2 | 700 | 09NOV2020 09:56 | LY3819253 700mg IV           |                    |
| 10291007 | 11833631552 | B8_11833631552_323690w_BB8.fastq.gz   | D614G | 99.89  | 2727.0 | 3234.235294117650  | 2.28 | NPH | 3.0 | 2 | 700 | 09NOV2020 09:56 | LY3819253 700mg IV           |                    |
| 10201008 | 11850339075 | E1_11850339075_323690w_BE1.fastq.gz   | D614G | 99.696 | 1643.0 | 1943.436053593180  | 6.43 | NAS |     | 2 | 2   | 700             | 22OCT2020 08:21              | LY3819253 700mg IV |
| 10201008 | 11850339075 | E1_11850339075_323690w_BE1.fastq.gz   | P681R | 100.0  | 1310.0 | 1943.436053593180  | 6.43 | NAS |     | 2 | 2   | 700             | 22OCT2020 08:21              | LY3819253 700mg IV |
| 10251008 | 11820978190 | E5_11820978190_323690w_BE5.fastq.gz   | D614G | 99.86  | 2142.0 | 2485.12            | 4.62 | NAS | 3.0 | 2 | 700 | 29OCT2020 11:22 | LY3819253 700mg IV           |                    |
| 10241004 | 11800010244 | A1_11800010244_323690w_BA1.fastq.gz   | T20I  | 99.831 | 8286.0 | 2599.046568627450  | 3.17 | NPH | 3.0 | 2 | 700 | 23OCT2020 12:58 | Placebo for LY3819253 700 mg |                    |
| 10241004 | 11800010244 | A1_11800010244_323690w_BA1.fastq.gz   | D614G | 99.771 | 2183.0 | 2599.046568627450  | 3.17 | NPH | 3.0 | 2 | 700 | 23OCT2020 12:58 | Placebo for LY3819253 700 mg |                    |
| 10311014 | 11812604302 | A11_11812604302_323690w_BA11.fastq.gz | D614G | 99.723 | 2167.0 | 2323.975113122170  | 6.56 | NAS | 3.0 | 2 | 700 | 20NOV2020 09:20 | Placebo for LY3819253 700 mg |                    |
| 10311014 | 11812604302 | A11_11812604302_323690w_BA11.fastq.gz | N679H | 71.506 | 1853.0 | 2323.975113122170  | 6.56 | NAS | 3.0 | 2 | 700 | 20NOV2020 09:20 | Placebo for LY3819253 700 mg |                    |
| 10491006 | 11818963392 | A3_11818963392_323690w_BA3.fastq.gz   | A27S  | 99.768 | 6028.0 | 2132.2330917874400 | 3.56 | NPH | 3.0 | 2 | 700 | 13NOV2020 09:40 | LY3819253 700mg IV           |                    |
| 10491006 | 11818963392 | A3_11818963392_323690w_BA3.fastq.gz   | S247N | 99.853 | 2040.0 | 2132.2330917874400 | 3.56 | NPH | 3.0 | 2 | 700 | 13NOV2020 09:40 | LY3819253 700mg IV           |                    |
| 10491006 | 11818963392 | A3_11818963392_323690w_BA3.fastq.gz   | D614G | 99.888 | 1781.0 | 2132.2330917874400 | 3.56 | NPH | 3.0 | 2 | 700 | 13NOV2020 09:40 | LY3819253 700mg IV           |                    |
| 10011025 | 11818961610 | A6_11818961610_323690w_BA6.fastq.gz   | D614G | 99.73  | 1852.0 | 2180.603117506000  | 4.6  | NPH | 3.0 | 2 | 700 | 19NOV2020 08:10 | Placebo for LY3819253 700 mg |                    |
| 10051009 | 11835657548 | B12_11835657548_323692w_NB12.fastq.gz | D614G | 99.73  | 2597.0 | 3728.8746928746900 | 2.46 | NAS | 3.0 | 2 | 700 | 16NOV2020 13:50 | LY3819253 700mg IV           |                    |
| 10121010 | 11804196416 | 26_11804196416_323231w_NC2.fastq.gz   | D614G | 100.0  | 682.0  | 844.563882063882   | 4.63 | NPH | 3.0 | 2 | 700 | 12NOV2020 12:43 | Placebo for LY3819253 700 mg |                    |
| 10201017 | 11818963906 | 16_11818963906_323231w_NB4.fastq.gz   | D614G | 99.899 | 990.0  | 1310.4747847478500 | 3.05 | NPH | 3.0 | 2 | 700 | 05NOV2020 11:34 | LY3819253 700mg IV           |                    |
| 10201017 | 11818963906 | 16_11818963906_323231w_NB4.fastq.gz   | M740I | 35.264 | 397.0  | 1310.4747847478500 | 3.05 | NPH | 3.0 | 2 | 700 | 05NOV2020 11:34 | LY3819253 700mg IV           |                    |
| 10311008 | 11839924483 | 7_11839924483_323231w_NA7.fastq.gz    | D614G | 100.0  | 1324.0 | 1758.4452466907300 | 2.89 | NPH | 3.0 | 2 | 700 | 02NOV2020 12:19 | Placebo for LY3819253 700 mg |                    |
| 10311008 | 11839924483 | 7_11839924483_323231w_NA7.fastq.gz    | K814N | 100.0  | 1.0    | 1758.4452466907300 | 2.89 | NPH | 3.0 | 2 | 700 | 02NOV2020 12:19 | Placebo for LY3819253 700 mg |                    |
| 10131011 | 11810487240 | 63_11810487240_323231w_NF3.fastq.gz   | D614G | 99.934 | 1524.0 | 1976.8784933171300 | 3.8  | NAS | 3.0 | 2 | 700 | 12NOV2020 13:42 | Placebo for LY3819253 700 mg |                    |
| 10131011 | 11810487240 | 63_11810487240_323231w_NF3.fastq.gz   | K814N | 25.0   | 4.0    | 1976.8784933171300 | 3.8  | NAS | 3.0 | 2 | 700 | 12NOV2020 13:42 | Placebo for LY3819253 700 mg |                    |
| 10141005 | 11806308676 | 70_11806308676_323231w_NF10.fastq.gz  | D614G | 99.87  | 1539.0 | 2099.6743902439000 | 3.64 | NPH | 3.0 | 2 | 700 | 09NOV2020 09:12 | Placebo for LY3819253 700 mg |                    |
| 10031026 | 11852515277 | 28_11852515277_323231w_NC4.fastq.gz   | R21I  | 99.826 | 4031.0 | 1228.5852760736200 | 2.47 | NPH | 3.0 | 2 | 700 | 16NOV2020 -2:-2 | LY3819253 700mg IV           |                    |
| 10031026 | 11852515277 | 28_11852515277_323231w_NC4.fastq.gz   | D614G | 99.675 | 922.0  | 1228.5852760736200 | 2.47 | NPH | 3.0 | 2 | 700 | 16NOV2020 -2:-2 | LY3819253 700mg IV           |                    |
| 10131007 | 11820985152 | 57_11820985152_323231w_NE9.fastq.gz   | R246G | 48.754 | 1846.0 | 1990.640870616690  | 4.18 | NPH | 3.0 | 2 | 700 | 26OCT2020 09:56 | Placebo for LY3819253 700 mg |                    |
| 10131007 | 11820985152 | 57_11820985152_323231w_NE9.fastq.gz   | D614G | 99.779 | 1358.0 | 1990.640870616690  | 4.18 | NPH | 3.0 | 2 | 700 | 26OCT2020 09:56 | Placebo for LY3819253 700 mg |                    |
| 10171006 | 11833639427 | 78_11833639427_32323                  |       |        |        |                    |      |     |     |   |     |                 |                              |                    |

|          |             |                                       |       |        |         |                    |      |     |     |   |     |                 |                              |
|----------|-------------|---------------------------------------|-------|--------|---------|--------------------|------|-----|-----|---|-----|-----------------|------------------------------|
| 10151003 | 11800017666 | 24_11800017666_323231w_NB12.fastq.gz  | R765C | 42.593 | 378.0   | 1033.818514007310  | 2.37 | NPH | 3.0 | 2 | 700 | 06NOV2020 08:44 | LY3819253 700mg IV           |
| 10151003 | 11800017666 | 24_11800017666_323231w_NB12.fastq.gz  | K814N | 50.0   | 2.0     | 1033.818514007310  | 2.37 | NPH | 3.0 | 2 | 700 | 06NOV2020 08:44 | LY3819253 700mg IV           |
| 10241005 | 11837828419 | 72_11837828419_323231w_NF12.fastq.gz  | F43T  | 99.75  | 10000.0 | 595.1779411764710  | 4.84 | NPH | 3.0 | 2 | 700 | 16NOV2020 09:15 | Placebo for LY3819253 700 mg |
| 10241005 | 11837828419 | 72_11837828419_323231w_NF12.fastq.gz  | N196T | 25.0   | 4.0     | 595.1779411764710  | 4.84 | NPH | 3.0 | 2 | 700 | 16NOV2020 09:15 | Placebo for LY3819253 700 mg |
| 10241005 | 11837828419 | 72_11837828419_323231w_NF12.fastq.gz  | Y313H | 42.857 | 7.0     | 595.1779411764710  | 4.84 | NPH | 3.0 | 2 | 700 | 16NOV2020 09:15 | Placebo for LY3819253 700 mg |
| 10241005 | 11837828419 | 72_11837828419_323231w_NF12.fastq.gz  | D614G | 100.0  | 2.0     | 595.1779411764710  | 4.84 | NPH | 3.0 | 2 | 700 | 16NOV2020 09:15 | Placebo for LY3819253 700 mg |
| 10241005 | 11837828419 | 72_11837828419_323231w_NF12.fastq.gz  | I720M | 25.0   | 4.0     | 595.1779411764710  | 4.84 | NPH | 3.0 | 2 | 700 | 16NOV2020 09:15 | Placebo for LY3819253 700 mg |
| 10131010 | 11810489794 | 53_11810489794_323231w_NE5.fastq.gz   | D111N | 99.855 | 691.0   | 1137.360824742270  | 6.82 | NPH | 3.0 | 2 | 700 | 12NOV2020 12:52 | Placebo for LY3819253 700 mg |
| 10131010 | 11810489794 | 53_11810489794_323231w_NE5.fastq.gz   | D614G | 100.0  | 959.0   | 1137.360824742270  | 6.82 | NPH | 3.0 | 2 | 700 | 12NOV2020 12:52 | Placebo for LY3819253 700 mg |
| 10131010 | 11810489794 | 53_11810489794_323231w_NE5.fastq.gz   | T732A | 98.658 | 1416.0  | 1137.360824742270  | 6.82 | NPH | 3.0 | 2 | 700 | 12NOV2020 12:52 | Placebo for LY3819253 700 mg |
| 10161007 | 11814750218 | 68_11814750218_323231w_NF8.fastq.gz   | N501T | 99.724 | 1809.0  | 1821.2137592137600 | 3.55 | NPH | 3.0 | 2 | 700 | 13NOV2020 09:33 | LY3819253 700mg IV           |
| 10161007 | 11814750218 | 68_11814750218_323231w_NF8.fastq.gz   | D614G | 99.583 | 1438.0  | 1821.2137592137600 | 3.55 | NPH | 3.0 | 2 | 700 | 13NOV2020 09:33 | LY3819253 700mg IV           |
| 10331007 | 11818963145 | 36_11818963145_323231w_NC12.fastq.gz  | D614G | 99.877 | 1629.0  | 2178.4810744810700 | 5.48 | NPH | 3.0 | 2 | 700 | 12NOV2020 12:14 | LY3819253 700mg IV           |
| 10081009 | 11837815880 | 47_11837815880_323231w_ND11.fastq.gz  | D614G | 99.911 | 2244.0  | 3040.006097560980  | 3.81 | NPH | 3.0 | 2 | 700 | 16NOV2020 11:47 | LY3819253 700mg IV           |
| 10081007 | 11837817922 | 48_11837817922_323231w_ND12.fastq.gz  | S98F  | 99.857 | 2791.0  | 2897.205882352940  | 2.73 | NPH | 3.0 | 2 | 700 | 13NOV2020 09:56 | Placebo for LY3819253 700 mg |
| 10081007 | 11837817922 | 48_11837817922_323231w_ND12.fastq.gz  | T240I | 27.874 | 2540.0  | 2897.205882352940  | 2.73 | NPH | 3.0 | 2 | 700 | 13NOV2020 09:56 | Placebo for LY3819253 700 mg |
| 10081007 | 11837817922 | 48_11837817922_323231w_ND12.fastq.gz  | D614G | 99.82  | 2217.0  | 2897.205882352940  | 2.73 | NPH | 3.0 | 2 | 700 | 13NOV2020 09:56 | Placebo for LY3819253 700 mg |
| 10201020 | 11820979402 | 42_11820979402_323231w_ND6.fastq.gz   | D614G | 99.88  | 2510.0  | 3097.8140947752100 | 4.08 | NPH | 3.0 | 2 | 700 | 12NOV2020 10:19 | Placebo for LY3819253 700 mg |
| 10181010 | 11802179982 | 12_11802179982_323523w_AF10.fastq.gz  | S255F | 99.944 | 1788.0  | 2061.6585662211400 | 3.16 | NPH | 3.0 | 2 | 700 | 13NOV2020 08:53 | LY3819253 700mg IV           |
| 10181010 | 11802179982 | 12_11802179982_323523w_AF10.fastq.gz  | D614G | 99.888 | 1791.0  | 2061.6585662211400 | 3.16 | NPH | 3.0 | 2 | 700 | 13NOV2020 08:53 | LY3819253 700mg IV           |
| 10181010 | 11802179982 | 12_11802179982_323523w_AF10.fastq.gz  | P681H | 99.859 | 1420.0  | 2061.6585662211400 | 3.16 | NPH | 3.0 | 2 | 700 | 13NOV2020 08:53 | LY3819253 700mg IV           |
| 10181009 | 11856693711 | 14_11856693711_323523w_AF12.fastq.gz  | D614G | 100.0  | 1968.0  | 2665.548619447780  | 3.47 | NPH | 3.0 | 2 | 700 | 09NOV2020 08:40 | LY3819253 700mg IV           |
| 10171002 | 11833572937 | F11_11833572937_324023w_AF11.fastq.gz | D614G | 99.799 | 1491.0  | 2367.5400943396200 | 4.5  | NPH | 3.0 | 2 | 700 | 16OCT2020 11:17 | Placebo for LY3819253 700 mg |
| 10171002 | 11833572937 | F11_11833572937_324023w_AF11.fastq.gz | Q677R | 99.875 | 1596.0  | 2367.5400943396200 | 4.5  | NPH | 3.0 | 2 | 700 | 16OCT2020 11:17 | Placebo for LY3819253 700 mg |
| 10141002 | 11806376973 | G4_11806376973_324023w_AG4.fastq.gz   | D614G | 99.475 | 381.0   | 790.8243080625750  | 3.3  | NPH | 3.0 | 2 | 700 | 16OCT2020 08:55 | LY3819253 700mg IV           |
| 10141002 | 11806376973 | G4_11806376973_324023w_AG4.fastq.gz   | K814N | 50.0   | 2.0     | 790.8243080625750  | 3.3  | NPH | 3.0 | 2 | 700 | 16OCT2020 08:55 | LY3819253 700mg IV           |
| 10241002 | 11837830473 | F7_11837830473_324023w_AF7.fastq.gz   | T20I  | 99.902 | 5127.0  | 2007.3714981729600 | 3.41 | NPH | 3.0 | 2 | 700 | 16OCT2020 12:23 | Placebo for LY3819253 700 mg |
| 10241002 | 11837830473 | F7_11837830473_324023w_AF7.fastq.gz   | D614G | 99.894 | 946.0   | 2007.3714981729600 | 3.41 | NPH | 3.0 | 2 | 700 | 16OCT2020 12:23 | Placebo for LY3819253 700 mg |
| 10241002 | 11837830473 | F7_11837830473_324023w_AF7.fastq.gz   | K814N | 50.0   | 2.0     | 2007.3714981729600 | 3.41 | NPH | 3.0 | 2 | 700 | 16OCT2020 12:23 | Placebo for LY3819253 700 mg |
| 10161004 | 11806298383 | G1_11806298383_324023w_AG1.fastq.gz   | T547I | 99.667 | 1800.0  | 1813.6291469194300 | 3.05 | NPH | 3.0 | 2 | 700 | 19OCT2020 12:00 | LY3819253 700mg IV           |
| 10161004 | 11806298383 | G1_11806298383_324023w_AG1.fastq.gz   | D614G | 99.902 | 1017.0  | 1813.6291469194300 | 3.05 | NPH | 3.0 | 2 | 700 | 19OCT2020 12:00 | LY3819253 700mg IV           |
| 10331001 | 11839859265 | C5_11839859265_324023w_AC5.fastq.gz   | D614G | 99.909 | 1102.0  | 1890.8983451536600 | 4.65 | NPH | 3.0 | 2 | 700 | 16OCT2020 13:12 | LY3819253 700mg IV           |
| 10331001 | 11839859265 | C5_11839859265_324023w_AC5.fastq.gz   | G832D | 22.222 | 18.0    | 1890.8983451536600 | 4.65 | NPH | 3.0 | 2 | 700 | 16OCT2020 13:12 | LY3819253 700mg IV           |
| 10021003 | 11833623563 | G11_11833623563_324023w_AG11.fastq.gz | D614G | 99.741 | 1543.0  | 2421.8222748815200 | 3.53 | NAS | 3.0 | 2 | 700 | 16OCT2020 10:15 | Placebo for LY3819253 700 mg |
| 10261024 | 11856697346 | F1_11856697346_324023w_AF1.fastq.gz   | T572I | 99.733 | 1499.0  | 2038.2151589242100 | 4.37 | NPH | 3.0 | 2 | 700 | 15OCT2020 09:34 | LY3819253 700mg IV           |
| 10261024 | 11856697346 | F1_11856697346_324023w_AF1.fastq.gz   | D614G | 99.828 | 1165.0  | 2038.2151589242100 | 4.37 | NPH | 3.0 | 2 | 700 | 15OCT2020 09:34 | LY3819253 700mg IV           |
| 10011013 | 11835666691 | G12_11835666691_324023w_AG12.fastq.gz | W152L | 99.748 | 1585.0  | 3393.552757793770  | 3.15 | NAS | 3.0 | 2 | 700 | 19OCT2020 13:46 | Placebo for LY3819253 700 mg |
| 10011013 | 11835666691 | G12_11835666691_324023w_AG12.fastq.gz | V289I | 99.771 | 2186.0  | 3393.552757793770  | 3.15 | NAS | 3.0 | 2 | 700 | 19OCT2020 13:46 | Placebo for LY3819253 700 mg |
| 10011013 | 11835666691 | G12_11835666691_324023w_AG12.fastq.gz | D614G | 100.0  | 2629.0  | 3393.552757793770  | 3.15 | NAS | 3.0 | 2 | 700 | 19OCT2020 13:46 | Placebo for LY3819253 700 mg |
| 10021003 | 11833621760 | 9_21760_322795w_BF4.fastq.gz          | T523I | 1.042  | 2878.0  | 2820.9227166276300 | 4.03 | NPH | 3.0 | 2 | 700 | 16OCT2020 10:15 | Placebo for LY3819253 700 mg |
| 10021003 | 11833621760 | 9_21760_322795w_BF4.fastq.gz          | K786R | 2.222  | 855.0   | 2820.9227166276300 | 4.03 | NPH | 3.0 | 2 | 700 | 16OCT2020 10:15 | Placebo for LY3819253 700 mg |
| 10031020 | 11835674757 | G9_11835674757_324020w_NG9.fastq.gz   | T76N  | 6.93   | 837.0   | 2379.8406326034100 | 2.64 | NPH | 3.0 | 2 | 700 | 30OCT2020 12:50 | LY3819253 700mg IV           |
| 10031020 | 11835674757 | G9_11835674757_324020w_NG9.fastq.gz   | F140Y | 4.372  | 549.0   | 2379.8406326034100 | 2.64 | NPH | 3.0 | 2 | 700 | 30OCT2020 12:50 | LY3819253 700mg IV           |
| 10031020 | 11835674757 | G9_11835674757_324020w_NG9.fastq.gz   | V143F | 7.407  | 540.0   | 2379.8406326034100 | 2.64 | NPH | 3.0 | 2 | 700 | 30OCT2020 12:50 | LY3819253 700mg IV           |
| 10031020 | 11835674757 | G9_11835674757_324020w_NG9.fastq.gz   | G482V | 1.71   | 7426.0  | 2379.8406326034100 | 2.64 | NPH | 3.0 | 2 | 700 | 30OCT2020 12:50 | LY3819253 700mg IV           |
| 10031020 | 11835674757 | G9_11835674757_324020w_NG9.fastq.gz   | K786R | 1.452  | 1171.0  | 2379.8406326034100 | 2.64 | NPH | 3.0 | 2 | 700 | 30OCT2020 12:50 | LY3819253 700mg IV           |
| 10121009 | 11804196419 | G2_11804196419_324020w_NG2.fastq.gz   | L335F | 9.205  | 1434.0  | 2418.2457420924600 | 2.36 | NPH | 3.0 | 2 | 700 | 12NOV2020 12:39 | Placebo for LY3819253 700 mg |
| 10121009 | 11804196419 | G2_11804196419_324020w_NG2.fastq.gz   | D428E | 14.38  | 10000.0 | 2418.2457420924600 | 2.36 | NPH | 3.0 | 2 | 700 | 12NOV2020 12:39 | Placebo for LY3819253 700 mg |
| 10121009 | 11804196419 | G2_11804196419_324020w_NG2.fastq.gz   | C662R | 9.345  | 2793.0  | 2418.2457420924600 | 2.36 | NPH | 3.0 | 2 | 700 | 12NOV2020 12:39 | Placebo for LY3819253 700 mg |
| 10201018 | 11818963649 | A6_11818963649_324020w_NA6.fastq.gz   | G446V | 11.455 | 9088.0  | 2457.341911764710  | 2.26 | NPH | 3.0 | 2 | 700 | 09NOV2020 10:00 | LY3819253 700mg IV           |
| 10201018 | 11818963649 | A6_11818963649_324020w_NA6.fastq.gz   | Q493_ | 11.533 | 4578.0  | 2457.341911764710  | 2.26 | NPH | 3.0 | 2 | 700 | 09NOV2020 10:00 | LY3819253 700mg IV           |
| 10201018 | 11818963649 | A6_11818963649_324020w_NA6.fastq.gz   | K786R | 2.051  | 975.0   | 2457.341911764710  | 2.26 | NPH | 3.0 | 2 | 700 | 09NOV2020 10:00 | LY3819253 700mg IV           |
| 10151004 | 11839917381 | F2_11839917381_324020w_NF2.fastq.gz   | K786R | 1.519  | 1185.0  | 2415.128992628990  | 2.48 | NPH | 3.0 | 2 | 700 | 16NOV2020 09:29 | Placebo for LY3819253 700 mg |
| 10031014 | 11835674766 | G7_11835674766_324020w_NG7.fastq.gz   | L546F | 1.039  | 2695.0  | 1894.0662576687100 | 2.31 | NPH | 3.0 | 2 | 700 | 20OCT2020 09:26 | LY3819253 700mg IV           |
| 10241003 | 11837827392 | G6_11837827392_324020w_NG6.fastq.gz   | S247I | 4.233  | 874.0   | 2552.543558282210  | 2.6  | NPH | 3.0 | 2 | 700 | 19OCT2020 11:17 | Placebo for LY3819253 700 mg |
| 10241003 | 11837827392 | G6_11837827392_324020w_NG6.fastq.gz   | K786R | 1.237  | 1213.0  | 2552.543558282210  | 2.6  | NPH | 3.0 | 2 | 700 | 19OCT2020 11:17 | Placebo for LY3819253 700 mg |
| 10691001 | 11802103494 | 23_11802103494_323284w_NB11.fastq.gz  | T240I | 2.655  | 1017.0  | 1105.1337423312900 | 3.01 | NPH | 3.0 | 2 | 700 | 09NOV2020 09:10 | Placebo for LY3819253 700 mg |
| 10691001 | 11802103494 | 23_11802103494_323284w_NB11.fastq.gz  | L335S | 2.282  | 964.0   | 1105.1337423312900 | 3.01 | NPH | 3.0 | 2 | 700 | 09NOV2020 09:10 | Placebo for LY3819253 700 mg |
| 10691001 | 11802103494 | 23_11802103494_323284w_NB11.fastq.gz  | D398H | 1.638  | 1038.0  | 1105.1337423312900 | 3.01 | NPH | 3.0 | 2 | 700 | 09NOV2020 09:10 | Placebo for LY3819253 700 mg |
| 10151002 | 11800016640 | 65_11800016640_323284w_NF5.fastq.gz   | Q506L | 6.589  | 1032.0  | 1153.4220858895700 | 2.84 | NPH | 3.0 | 2 | 700 | 19OCT2020 09:26 | Placebo for LY3819253 700 mg |
| 10151002 | 11800016640 | 65_11800016640_323284w_NF5.fastq.gz   | A575V | 2.616  | 994.0   | 1153.4220858895700 | 2.84 | NPH | 3.0 | 2 | 700 | 19OCT2020 09:26 | Placebo for LY3819253 700 mg |
| 10151002 | 11800016640 | 65_11800016640_323284w_NF5.fastq.gz   | P793Q | 6.947  | 547.0   | 1153.4220858895700 | 2.84 | NPH | 3.0 | 2 | 700 | 19OCT2020 09:26 | Placebo for LY3819253 700 mg |
| 10141003 | 11806307911 | 66_11806307911_323284w_NF6.fastq.gz   | A243S | 1.056  | 1326.0  | 1423.0416156670700 | 3.94 | NPH | 3.0 | 2 | 700 | 23OCT2020 09:32 | LY3819253 700mg IV           |
| 10141003 | 11806307911 | 66_11806307911_323284w_NF6.fastq.gz   | S591F | 1.079  | 1112.0  | 1423.0416156670700 | 3.94 | NPH | 3.0 | 2 | 7   |                 |                              |

|          |             |                                      |       |        |        |                    |      |     |     |   |     |                 |                              |
|----------|-------------|--------------------------------------|-------|--------|--------|--------------------|------|-----|-----|---|-----|-----------------|------------------------------|
| 10371004 | 11833579779 | 6_11833579779_323284w_NA6.fastq.gz   | T124A | 1.201  | 1249.0 | 1260.455205811140  | 3.55 | NPH | 3.0 | 2 | 700 | 05NOV2020 11:00 | Placebo for LY3819253 700 mg |
| 10371004 | 11833579779 | 6_11833579779_323284w_NA6.fastq.gz   | R158S | 1.187  | 1179.0 | 1260.455205811140  | 3.55 | NPH | 3.0 | 2 | 700 | 05NOV2020 11:00 | Placebo for LY3819253 700 mg |
| 10371004 | 11833579779 | 6_11833579779_323284w_NA6.fastq.gz   | V159F | 1.18   | 1186.0 | 1260.455205811140  | 3.55 | NPH | 3.0 | 2 | 700 | 05NOV2020 11:00 | Placebo for LY3819253 700 mg |
| 10371004 | 11833579779 | 6_11833579779_323284w_NA6.fastq.gz   | C291G | 1.322  | 1286.0 | 1260.455205811140  | 3.55 | NPH | 3.0 | 2 | 700 | 05NOV2020 11:00 | Placebo for LY3819253 700 mg |
| 10371004 | 11833579779 | 6_11833579779_323284w_NA6.fastq.gz   | Y313H | 1.377  | 1235.0 | 1260.455205811140  | 3.55 | NPH | 3.0 | 2 | 700 | 05NOV2020 11:00 | Placebo for LY3819253 700 mg |
| 10371004 | 11833579779 | 6_11833579779_323284w_NA6.fastq.gz   | V512I | 1.17   | 1197.0 | 1260.455205811140  | 3.55 | NPH | 3.0 | 2 | 700 | 05NOV2020 11:00 | Placebo for LY3819253 700 mg |
| 10371004 | 11833579779 | 6_11833579779_323284w_NA6.fastq.gz   | Q564L | 1.168  | 1113.0 | 1260.455205811140  | 3.55 | NPH | 3.0 | 2 | 700 | 05NOV2020 11:00 | Placebo for LY3819253 700 mg |
| 10371004 | 11833579779 | 6_11833579779_323284w_NA6.fastq.gz   | P621L | 1.276  | 1019.0 | 1260.455205811140  | 3.55 | NPH | 3.0 | 2 | 700 | 05NOV2020 11:00 | Placebo for LY3819253 700 mg |
| 10371004 | 11833579779 | 6_11833579779_323284w_NA6.fastq.gz   | E748K | 1.462  | 342.0  | 1260.455205811140  | 3.55 | NPH | 3.0 | 2 | 700 | 05NOV2020 11:00 | Placebo for LY3819253 700 mg |
| 10371005 | 11833580299 | 7_11833580299_323284w_NA7.fastq.gz   | T302M | 5.566  | 521.0  | 503.2911084043850  | 2.98 | NPH | 3.0 | 2 | 700 | 05NOV2020 10:45 | LY3819253 700mg IV           |
| 10371005 | 11833580299 | 7_11833580299_323284w_NA7.fastq.gz   | P479L | 3.165  | 474.0  | 503.2911084043850  | 2.98 | NPH | 3.0 | 2 | 700 | 05NOV2020 10:45 | LY3819253 700mg IV           |
| 10371005 | 11833580299 | 7_11833580299_323284w_NA7.fastq.gz   | V483A | 8.879  | 473.0  | 503.2911084043850  | 2.98 | NPH | 3.0 | 2 | 700 | 05NOV2020 10:45 | LY3819253 700mg IV           |
| 10371005 | 11833580299 | 7_11833580299_323284w_NA7.fastq.gz   | T500I | 10.256 | 429.0  | 503.2911084043850  | 2.98 | NPH | 3.0 | 2 | 700 | 05NOV2020 10:45 | LY3819253 700mg IV           |
| 10371005 | 11833580299 | 7_11833580299_323284w_NA7.fastq.gz   | S514F | 6.221  | 434.0  | 503.2911084043850  | 2.98 | NPH | 3.0 | 2 | 700 | 05NOV2020 10:45 | LY3819253 700mg IV           |
| 10371005 | 11833580299 | 7_11833580299_323284w_NA7.fastq.gz   | A701V | 6.623  | 302.0  | 503.2911084043850  | 2.98 | NPH | 3.0 | 2 | 700 | 05NOV2020 10:45 | LY3819253 700mg IV           |
| 10371005 | 11833580299 | 7_11833580299_323284w_NA7.fastq.gz   | T761I | 1.739  | 115.0  | 503.2911084043850  | 2.98 | NPH | 3.0 | 2 | 700 | 05NOV2020 10:45 | LY3819253 700mg IV           |
| 10291005 | 11833631561 | 8_11833631561_323284w_NA8.fastq.gz   | G75A  | 2.456  | 1303.0 | 905.1404761904760  | 3.42 | NPH | 3.0 | 2 | 700 | 05NOV2020 11:44 | Placebo for LY3819253 700 mg |
| 10291005 | 11833631561 | 8_11833631561_323284w_NA8.fastq.gz   | P85S  | 3.475  | 1151.0 | 905.1404761904760  | 3.42 | NPH | 3.0 | 2 | 700 | 05NOV2020 11:44 | Placebo for LY3819253 700 mg |
| 10291005 | 11833631561 | 8_11833631561_323284w_NA8.fastq.gz   | Q134H | 2.107  | 807.0  | 905.1404761904760  | 3.42 | NPH | 3.0 | 2 | 700 | 05NOV2020 11:44 | Placebo for LY3819253 700 mg |
| 10291005 | 11833631561 | 8_11833631561_323284w_NA8.fastq.gz   | T240I | 4.413  | 861.0  | 905.1404761904760  | 3.42 | NPH | 3.0 | 2 | 700 | 05NOV2020 11:44 | Placebo for LY3819253 700 mg |
| 10291005 | 11833631561 | 8_11833631561_323284w_NA8.fastq.gz   | Y279_ | 3.636  | 825.0  | 905.1404761904760  | 3.42 | NPH | 3.0 | 2 | 700 | 05NOV2020 11:44 | Placebo for LY3819253 700 mg |
| 10291005 | 11833631561 | 8_11833631561_323284w_NA8.fastq.gz   | G283_ | 3.869  | 853.0  | 905.1404761904760  | 3.42 | NPH | 3.0 | 2 | 700 | 05NOV2020 11:44 | Placebo for LY3819253 700 mg |
| 10291005 | 11833631561 | 8_11833631561_323284w_NA8.fastq.gz   | P295T | 3.941  | 888.0  | 905.1404761904760  | 3.42 | NPH | 3.0 | 2 | 700 | 05NOV2020 11:44 | Placebo for LY3819253 700 mg |
| 10291005 | 11833631561 | 8_11833631561_323284w_NA8.fastq.gz   | R319I | 3.586  | 948.0  | 905.1404761904760  | 3.42 | NPH | 3.0 | 2 | 700 | 05NOV2020 11:44 | Placebo for LY3819253 700 mg |
| 10291005 | 11833631561 | 8_11833631561_323284w_NA8.fastq.gz   | S375F | 2.354  | 892.0  | 905.1404761904760  | 3.42 | NPH | 3.0 | 2 | 700 | 05NOV2020 11:44 | Placebo for LY3819253 700 mg |
| 10291005 | 11833631561 | 8_11833631561_323284w_NA8.fastq.gz   | T376I | 3.153  | 888.0  | 905.1404761904760  | 3.42 | NPH | 3.0 | 2 | 700 | 05NOV2020 11:44 | Placebo for LY3819253 700 mg |
| 10291005 | 11833631561 | 8_11833631561_323284w_NA8.fastq.gz   | G446V | 2.68   | 933.0  | 905.1404761904760  | 3.42 | NPH | 3.0 | 2 | 700 | 05NOV2020 11:44 | Placebo for LY3819253 700 mg |
| 10291005 | 11833631561 | 8_11833631561_323284w_NA8.fastq.gz   | G447C | 2.572  | 933.0  | 905.1404761904760  | 3.42 | NPH | 3.0 | 2 | 700 | 05NOV2020 11:44 | Placebo for LY3819253 700 mg |
| 10291005 | 11833631561 | 8_11833631561_323284w_NA8.fastq.gz   | A475S | 2.876  | 904.0  | 905.1404761904760  | 3.42 | NPH | 3.0 | 2 | 700 | 05NOV2020 11:44 | Placebo for LY3819253 700 mg |
| 10291005 | 11833631561 | 8_11833631561_323284w_NA8.fastq.gz   | P491L | 1.562  | 896.0  | 905.1404761904760  | 3.42 | NPH | 3.0 | 2 | 700 | 05NOV2020 11:44 | Placebo for LY3819253 700 mg |
| 10291005 | 11833631561 | 8_11833631561_323284w_NA8.fastq.gz   | L513P | 2.057  | 875.0  | 905.1404761904760  | 3.42 | NPH | 3.0 | 2 | 700 | 05NOV2020 11:44 | Placebo for LY3819253 700 mg |
| 10291005 | 11833631561 | 8_11833631561_323284w_NA8.fastq.gz   | C525S | 2.113  | 899.0  | 905.1404761904760  | 3.42 | NPH | 3.0 | 2 | 700 | 05NOV2020 11:44 | Placebo for LY3819253 700 mg |
| 10291005 | 11833631561 | 8_11833631561_323284w_NA8.fastq.gz   | G545V | 3.341  | 868.0  | 905.1404761904760  | 3.42 | NPH | 3.0 | 2 | 700 | 05NOV2020 11:44 | Placebo for LY3819253 700 mg |
| 10291005 | 11833631561 | 8_11833631561_323284w_NA8.fastq.gz   | R577L | 3.89   | 797.0  | 905.1404761904760  | 3.42 | NPH | 3.0 | 2 | 700 | 05NOV2020 11:44 | Placebo for LY3819253 700 mg |
| 10291005 | 11833631561 | 8_11833631561_323284w_NA8.fastq.gz   | C590F | 2.291  | 742.0  | 905.1404761904760  | 3.42 | NPH | 3.0 | 2 | 700 | 05NOV2020 11:44 | Placebo for LY3819253 700 mg |
| 10291005 | 11833631561 | 8_11833631561_323284w_NA8.fastq.gz   | A653S | 3.639  | 632.0  | 905.1404761904760  | 3.42 | NPH | 3.0 | 2 | 700 | 05NOV2020 11:44 | Placebo for LY3819253 700 mg |
| 10291005 | 11833631561 | 8_11833631561_323284w_NA8.fastq.gz   | Q675_ | 3.933  | 534.0  | 905.1404761904760  | 3.42 | NPH | 3.0 | 2 | 700 | 05NOV2020 11:44 | Placebo for LY3819253 700 mg |
| 10291005 | 11833631561 | 8_11833631561_323284w_NA8.fastq.gz   | I714M | 3.991  | 451.0  | 905.1404761904760  | 3.42 | NPH | 3.0 | 2 | 700 | 05NOV2020 11:44 | Placebo for LY3819253 700 mg |
| 10261032 | 11814751041 | 41_11814751041_323284w_ND5.fastq.gz  | F43S  | 13.583 | 3254.0 | 901.7088915956150  | 5.92 | NPH | 3.0 | 2 | 700 | 15NOV2020 10:23 | Placebo for LY3819253 700 mg |
| 10491004 | 11852526342 | 10_11852526342_323284w_NA10.fastq.gz | P9T   | 2.009  | 1145.0 | 543.0675675675680  | 3.46 | NPH | 3.0 | 2 | 700 | 06NOV2020 11:04 | Placebo for LY3819253 700 mg |
| 10491004 | 11852526342 | 10_11852526342_323284w_NA10.fastq.gz | G261V | 1.111  | 450.0  | 543.0675675675680  | 3.46 | NPH | 3.0 | 2 | 700 | 06NOV2020 11:04 | Placebo for LY3819253 700 mg |
| 10951001 | 11804224142 | 21_11804224142_323284w_NB9.fastq.gz  | A27V  | 1.137  | 1847.0 | 661.3219512195120  | 3.82 | NPH | 3.0 | 2 | 700 | 09NOV2020 10:35 | LY3819253 700mg IV           |
| 10951001 | 11804224142 | 21_11804224142_323284w_NB9.fastq.gz  | T274I | 1.033  | 581.0  | 661.3219512195120  | 3.82 | NPH | 3.0 | 2 | 700 | 09NOV2020 10:35 | LY3819253 700mg IV           |
| 10951001 | 11804224142 | 21_11804224142_323284w_NB9.fastq.gz  | A435V | 1.006  | 696.0  | 661.3219512195120  | 3.82 | NPH | 3.0 | 2 | 700 | 09NOV2020 10:35 | LY3819253 700mg IV           |
| 10951001 | 11804224142 | 21_11804224142_323284w_NB9.fastq.gz  | P463T | 1.282  | 624.0  | 661.3219512195120  | 3.82 | NPH | 3.0 | 2 | 700 | 09NOV2020 10:35 | LY3819253 700mg IV           |
| 10951001 | 11804224142 | 21_11804224142_323284w_NB9.fastq.gz  | L513F | 1.394  | 574.0  | 661.3219512195120  | 3.82 | NPH | 3.0 | 2 | 700 | 09NOV2020 10:35 | LY3819253 700mg IV           |
| 10951001 | 11804224142 | 21_11804224142_323284w_NB9.fastq.gz  | S640Y | 1.07   | 561.0  | 661.3219512195120  | 3.82 | NPH | 3.0 | 2 | 700 | 09NOV2020 10:35 | LY3819253 700mg IV           |
| 10951001 | 11804224142 | 21_11804224142_323284w_NB9.fastq.gz  | L752F | 1.17   | 171.0  | 661.3219512195120  | 3.82 | NPH | 3.0 | 2 | 700 | 09NOV2020 10:35 | LY3819253 700mg IV           |
| 10441002 | 11854608907 | 44_11854608907_323284w_ND8.fastq.gz  | S659A | 1.821  | 604.0  | 914.3857493857490  | 2.48 | NPH | 3.0 | 2 | 700 | 16NOV2020 11:36 | LY3819253 700mg IV           |
| 10441002 | 11854608907 | 44_11854608907_323284w_ND8.fastq.gz  | I805K | 1.25   | 160.0  | 914.3857493857490  | 2.48 | NPH | 3.0 | 2 | 700 | 16NOV2020 11:36 | LY3819253 700mg IV           |
| 10951002 | 11804224140 | 32_11804224140_323284w_NC8.fastq.gz  | A783E | 11.7   | 906.0  | 1303.052503052500  | 5.38 | NPH | 3.0 | 2 | 700 | 12NOV2020 07:35 | LY3819253 700mg IV           |
| 10251007 | 11820978437 | 87_11820978437_323284w_NH3.fastq.gz  | S221L | 13.725 | 459.0  | 508.69395017793600 | 6.18 | NPH | 3.0 | 2 | 700 | 23OCT2020 09:12 | Placebo for LY3819253 700 mg |
| 10371007 | 11833647360 | 30_11833647360_323284w_NC6.fastq.gz  | P9L   | 1.408  | 4191.0 | 1437.1745454545500 | 3.38 | NPH | 3.0 | 2 | 700 | 10NOV2020 11:05 | Placebo for LY3819253 700 mg |
| 10371007 | 11833647360 | 30_11833647360_323284w_NC6.fastq.gz  | L18F  | 1.539  | 4484.0 | 1437.1745454545500 | 3.38 | NPH | 3.0 | 2 | 700 | 10NOV2020 11:05 | Placebo for LY3819253 700 mg |
| 10371007 | 11833647360 | 30_11833647360_323284w_NC6.fastq.gz  | S31F  | 1.357  | 4274.0 | 1437.1745454545500 | 3.38 | NPH | 3.0 | 2 | 700 | 10NOV2020 11:05 | Placebo for LY3819253 700 mg |
| 10371007 | 11833647360 | 30_11833647360_323284w_NC6.fastq.gz  | L56S  | 1.374  | 2983.0 | 1437.1745454545500 | 3.38 | NPH | 3.0 | 2 | 700 | 10NOV2020 11:05 | Placebo for LY3819253 700 mg |
| 10371007 | 11833647360 | 30_11833647360_323284w_NC6.fastq.gz  | K278I | 1.097  | 1185.0 | 1437.1745454545500 | 3.38 | NPH | 3.0 | 2 | 700 | 10NOV2020 11:05 | Placebo for LY3819253 700 mg |
| 10371007 | 11833647360 | 30_11833647360_323284w_NC6.fastq.gz  | N388D | 1.531  | 1372.0 | 1437.1745454545500 | 3.38 | NPH | 3.0 | 2 | 700 | 10NOV2020 11:05 | Placebo for LY3819253 700 mg |
| 10371007 | 11833647360 | 30_11833647360_323284w_NC6.fastq.gz  | E471G | 1.363  | 1321.0 | 1437.1745454545500 | 3.38 | NPH | 3.0 | 2 | 700 | 10NOV2020 11:05 | Placebo for LY3819253 700 mg |
| 10371007 | 11833647360 | 30_11833647360_323284w_NC6.fastq.gz  | V511A | 1.461  | 1369.0 | 1437.1745454545500 | 3.38 | NPH | 3.0 | 2 | 700 | 10NOV2020 11:05 | Placebo for LY3819253 700 mg |
| 10371007 | 11833647360 | 30_11833647360_323284w_NC6.fastq.gz  | L552F | 1.12   | 1161.0 | 1437.1745454545500 | 3.38 | NPH | 3.0 | 2 | 700 | 10NOV2020 11:05 | Placebo for LY3819253 700 mg |
| 10371007 | 11833647360 | 30_11833647360_323284w_NC6.fastq.gz  | N606K | 1.244  | 1045.0 | 1437.1745454545500 | 3.38 | NPH | 3.0 | 2 | 700 | 10NOV2020 11:05 | Placebo for LY3819253 700 mg |
| 10371007 | 11833647360 | 30_11833647360_323284w_NC6.fastq.gz  | L611F | 1.531  | 1045.0 | 1437.1745454545500 | 3.38 | NPH | 3.0 | 2 | 700 | 10NOV2020 11:05 | Placebo for LY3819253 700 mg |
| 10371007 | 11833647360 | 30_11833647360_323284w_NC6.fastq.gz  | A771V | 1.747  | 1202.0 | 1437.1745454545500 | 3.38 | NPH | 3.0 | 2 | 700 | 10NOV2020 11:05 | Placebo for LY3819253 700 mg |
| 1        |             |                                      |       |        |        |                    |      |     |     |   |     |                 |                              |

|          |             |                                       |         |       |        |                    |      |     |       |   |     |                 |                              |
|----------|-------------|---------------------------------------|---------|-------|--------|--------------------|------|-----|-------|---|-----|-----------------|------------------------------|
| 10201014 | 11818961344 | 295_11818961344_323348w_NG11.fastq.gz | A475S   | 6.123 | 2515.0 | 2653.987922705310  | 2.21 | NPH | 3.0   | 2 | 700 | 02NOV2020 08:01 | Placebo for LY3819253 700 mg |
| 10201014 | 11818961344 | 295_11818961344_323348w_NG11.fastq.gz | N501I   | 5.494 | 3258.0 | 2653.987922705310  | 2.21 | NPH | 3.0   | 2 | 700 | 02NOV2020 08:01 | Placebo for LY3819253 700 mg |
| 10201014 | 11818961344 | 295_11818961344_323348w_NG11.fastq.gz | R509S   | 5.674 | 3243.0 | 2653.987922705310  | 2.21 | NPH | 3.0   | 2 | 700 | 02NOV2020 08:01 | Placebo for LY3819253 700 mg |
| 10201014 | 11818961344 | 295_11818961344_323348w_NG11.fastq.gz | E654_   | 5.5   | 1800.0 | 2653.987922705310  | 2.21 | NPH | 3.0   | 2 | 700 | 02NOV2020 08:01 | Placebo for LY3819253 700 mg |
| 10201014 | 11818961344 | 295_11818961344_323348w_NG11.fastq.gz | Y789D   | 1.309 | 3286.0 | 2653.987922705310  | 2.21 | NPH | 3.0   | 2 | 700 | 02NOV2020 08:01 | Placebo for LY3819253 700 mg |
| 10041006 | 11802101517 | 163_11802101517_323348w_NF1.fastq.gz  | T430P   | 1.028 | 3112.0 | 1278.45584725537   | 2.65 | NPH | 3.0   | 2 | 700 | 16NOV2020 11:38 | LY3819253 700mg IV           |
| 10041006 | 11802101517 | 163_11802101517_323348w_NF1.fastq.gz  | P491L   | 3.273 | 1558.0 | 1278.45584725537   | 2.65 | NPH | 3.0   | 2 | 700 | 16NOV2020 11:38 | LY3819253 700mg IV           |
| 10041006 | 11802101517 | 163_11802101517_323348w_NF1.fastq.gz  | Y505H   | 3.715 | 1669.0 | 1278.45584725537   | 2.65 | NPH | 3.0   | 2 | 700 | 16NOV2020 11:38 | LY3819253 700mg IV           |
| 10041006 | 11802101517 | 163_11802101517_323348w_NF1.fastq.gz  | E583D   | 4.479 | 893.0  | 1278.45584725537   | 2.65 | NPH | 3.0   | 2 | 700 | 16NOV2020 11:38 | LY3819253 700mg IV           |
| 10041006 | 11802101517 | 163_11802101517_323348w_NF1.fastq.gz  | T638I   | 3.209 | 779.0  | 1278.45584725537   | 2.65 | NPH | 3.0   | 2 | 700 | 16NOV2020 11:38 | LY3819253 700mg IV           |
| 10041006 | 11802101517 | 163_11802101517_323348w_NF1.fastq.gz  | S686I   | 3.04  | 921.0  | 1278.45584725537   | 2.65 | NPH | 3.0   | 2 | 700 | 16NOV2020 11:38 | LY3819253 700mg IV           |
| 10041006 | 11802101517 | 163_11802101517_323348w_NF1.fastq.gz  | A688V   | 3.627 | 965.0  | 1278.45584725537   | 2.65 | NPH | 3.0   | 2 | 700 | 16NOV2020 11:38 | LY3819253 700mg IV           |
| 10041006 | 11802101517 | 163_11802101517_323348w_NF1.fastq.gz  | T724I   | 3.264 | 919.0  | 1278.45584725537   | 2.65 | NPH | 3.0   | 2 | 700 | 16NOV2020 11:38 | LY3819253 700mg IV           |
| 10041006 | 11802101517 | 163_11802101517_323348w_NF1.fastq.gz  | V736L   | 3.133 | 766.0  | 1278.45584725537   | 2.65 | NPH | 3.0   | 2 | 700 | 16NOV2020 11:38 | LY3819253 700mg IV           |
| 10041006 | 11802101517 | 163_11802101517_323348w_NF1.fastq.gz  | K786del | 3.268 | 1591.0 | 1278.45584725537   | 2.65 | NPH | 3.0   | 2 | 700 | 16NOV2020 11:38 | LY3819253 700mg IV           |
| 10041006 | 11802101517 | 163_11802101517_323348w_NF1.fastq.gz  | S803F   | 2.216 | 1534.0 | 1278.45584725537   | 2.65 | NPH | 3.0   | 2 | 700 | 16NOV2020 11:38 | LY3819253 700mg IV           |
| 10201013 | 11818963146 | 296_11818963146_323348w_NG12.fastq.gz | T430P   | 1.271 | 1259.0 | 543.1451247165530  | 2.42 | NPH | 3.0   | 2 | 700 | 02NOV2020 09:55 | LY3819253 700mg IV           |
| 10201013 | 11818963146 | 296_11818963146_323348w_NG12.fastq.gz | T430A   | 1.033 | 1259.0 | 543.1451247165530  | 2.42 | NPH | 3.0   | 2 | 700 | 02NOV2020 09:55 | LY3819253 700mg IV           |
| 10201013 | 11818963146 | 296_11818963146_323348w_NG12.fastq.gz | N440T   | 3.979 | 1307.0 | 543.1451247165530  | 2.42 | NPH | 3.0   | 2 | 700 | 02NOV2020 09:55 | LY3819253 700mg IV           |
| 10201013 | 11818963146 | 296_11818963146_323348w_NG12.fastq.gz | G446V   | 4.326 | 1364.0 | 543.1451247165530  | 2.42 | NPH | 3.0   | 2 | 700 | 02NOV2020 09:55 | LY3819253 700mg IV           |
| 10201013 | 11818963146 | 296_11818963146_323348w_NG12.fastq.gz | T478I   | 4.146 | 603.0  | 543.1451247165530  | 2.42 | NPH | 3.0   | 2 | 700 | 02NOV2020 09:55 | LY3819253 700mg IV           |
| 10201013 | 11818963146 | 296_11818963146_323348w_NG12.fastq.gz | P479S   | 3.105 | 612.0  | 543.1451247165530  | 2.42 | NPH | 3.0   | 2 | 700 | 02NOV2020 09:55 | LY3819253 700mg IV           |
| 10201013 | 11818963146 | 296_11818963146_323348w_NG12.fastq.gz | F490L   | 2.241 | 714.0  | 543.1451247165530  | 2.42 | NPH | 3.0   | 2 | 700 | 02NOV2020 09:55 | LY3819253 700mg IV           |
| 10201013 | 11818963146 | 296_11818963146_323348w_NG12.fastq.gz | G496C   | 1.517 | 725.0  | 543.1451247165530  | 2.42 | NPH | 3.0   | 2 | 700 | 02NOV2020 09:55 | LY3819253 700mg IV           |
| 10201013 | 11818963146 | 296_11818963146_323348w_NG12.fastq.gz | G504V   | 3.989 | 727.0  | 543.1451247165530  | 2.42 | NPH | 3.0   | 2 | 700 | 02NOV2020 09:55 | LY3819253 700mg IV           |
| 10201013 | 11818963146 | 296_11818963146_323348w_NG12.fastq.gz | S530F   | 4.647 | 538.0  | 543.1451247165530  | 2.42 | NPH | 3.0   | 2 | 700 | 02NOV2020 09:55 | LY3819253 700mg IV           |
| 10201013 | 11818963146 | 296_11818963146_323348w_NG12.fastq.gz | N532I   | 1.714 | 525.0  | 543.1451247165530  | 2.42 | NPH | 3.0   | 2 | 700 | 02NOV2020 09:55 | LY3819253 700mg IV           |
| 10201013 | 11818963146 | 296_11818963146_323348w_NG12.fastq.gz | L582F   | 2.222 | 360.0  | 543.1451247165530  | 2.42 | NPH | 3.0   | 2 | 700 | 02NOV2020 09:55 | LY3819253 700mg IV           |
| 10201013 | 11818963146 | 296_11818963146_323348w_NG12.fastq.gz | S605F   | 6.355 | 299.0  | 543.1451247165530  | 2.42 | NPH | 3.0   | 2 | 700 | 02NOV2020 09:55 | LY3819253 700mg IV           |
| 10201013 | 11818963146 | 296_11818963146_323348w_NG12.fastq.gz | D614C   | 3.344 | 299.0  | 543.1451247165530  | 2.42 | NPH | 3.0   | 2 | 700 | 02NOV2020 09:55 | LY3819253 700mg IV           |
| 10201013 | 11818963146 | 296_11818963146_323348w_NG12.fastq.gz | A653V   | 3.906 | 384.0  | 543.1451247165530  | 2.42 | NPH | 3.0   | 2 | 700 | 02NOV2020 09:55 | LY3819253 700mg IV           |
| 10201013 | 11818963146 | 296_11818963146_323348w_NG12.fastq.gz | A713S   | 2.459 | 488.0  | 543.1451247165530  | 2.42 | NPH | 3.0   | 2 | 700 | 02NOV2020 09:55 | LY3819253 700mg IV           |
| 10201013 | 11818963146 | 296_11818963146_323348w_NG12.fastq.gz | T719I   | 1.336 | 449.0  | 543.1451247165530  | 2.42 | NPH | 3.0   | 2 | 700 | 02NOV2020 09:55 | LY3819253 700mg IV           |
| 10201013 | 11818963146 | 296_11818963146_323348w_NG12.fastq.gz | C749R   | 5.079 | 315.0  | 543.1451247165530  | 2.42 | NPH | 3.0   | 2 | 700 | 02NOV2020 09:55 | LY3819253 700mg IV           |
| 10201013 | 11818963146 | 296_11818963146_323348w_NG12.fastq.gz | S750R   | 1.645 | 304.0  | 543.1451247165530  | 2.42 | NPH | 3.0   | 2 | 700 | 02NOV2020 09:55 | LY3819253 700mg IV           |
| 10201013 | 11818963146 | 296_11818963146_323348w_NG12.fastq.gz | K776del | 1.894 | 739.0  | 543.1451247165530  | 2.42 | NPH | 3.0   | 2 | 700 | 02NOV2020 09:55 | LY3819253 700mg IV           |
| 10201013 | 11818963146 | 296_11818963146_323348w_NG12.fastq.gz | Q784_   | 2.966 | 708.0  | 543.1451247165530  | 2.42 | NPH | 3.0   | 2 | 700 | 02NOV2020 09:55 | LY3819253 700mg IV           |
| 10201013 | 11818963146 | 296_11818963146_323348w_NG12.fastq.gz | Y789D   | 1.576 | 698.0  | 543.1451247165530  | 2.42 | NPH | 3.0   | 2 | 700 | 02NOV2020 09:55 | LY3819253 700mg IV           |
| 10201013 | 11818963146 | 296_11818963146_323348w_NG12.fastq.gz | Q804_   | 1.466 | 682.0  | 543.1451247165530  | 2.42 | NPH | 3.0   | 2 | 700 | 02NOV2020 09:55 | LY3819253 700mg IV           |
| 10201016 | 11818961088 | 13_11818961088_323348w_NA5.fastq.gz   | T430P   | 2.0   | 2700.0 | 808.7858880778590  | 2.01 | NPH | 3.0   | 2 | 700 | 05NOV2020 08:35 | Placebo for LY3819253 700 mg |
| 10201016 | 11818961088 | 13_11818961088_323348w_NA5.fastq.gz   | S750N   | 1.058 | 189.0  | 808.7858880778590  | 2.01 | NPH | 3.0   | 2 | 700 | 05NOV2020 08:35 | Placebo for LY3819253 700 mg |
| 10201016 | 11818961088 | 13_11818961088_323348w_NA5.fastq.gz   | K786R   | 1.365 | 293.0  | 808.7858880778590  | 2.01 | NPH | 3.0   | 2 | 700 | 05NOV2020 08:35 | Placebo for LY3819253 700 mg |
| 10331004 | 11839860298 | 255_11839860298_323348w_NG4.fastq.gz  | Q414_   | 4.298 | 4583.0 | 1445.9615384615400 | 2.53 | NPH | 3.0   | 2 | 700 | 26OCT2020 09:54 | LY3819253 700mg IV           |
| 10331004 | 11839860298 | 255_11839860298_323348w_NG4.fastq.gz  | T430P   | 1.539 | 4677.0 | 1445.9615384615400 | 2.53 | NPH | 3.0   | 2 | 700 | 26OCT2020 09:54 | LY3819253 700mg IV           |
| 10331004 | 11839860298 | 255_11839860298_323348w_NG4.fastq.gz  | P463L   | 3.883 | 1339.0 | 1445.9615384615400 | 2.53 | NPH | 3.0   | 2 | 700 | 26OCT2020 09:54 | LY3819253 700mg IV           |
| 10331004 | 11839860298 | 255_11839860298_323348w_NG4.fastq.gz  | G502C   | 3.824 | 2380.0 | 1445.9615384615400 | 2.53 | NPH | 3.0   | 2 | 700 | 26OCT2020 09:54 | LY3819253 700mg IV           |
| 10331004 | 11839860298 | 255_11839860298_323348w_NG4.fastq.gz  | F592S   | 1.087 | 1012.0 | 1445.9615384615400 | 2.53 | NPH | 3.0   | 2 | 700 | 26OCT2020 09:54 | LY3819253 700mg IV           |
| 10331004 | 11839860298 | 255_11839860298_323348w_NG4.fastq.gz  | H625Y   | 4.444 | 765.0  | 1445.9615384615400 | 2.53 | NPH | 3.0   | 2 | 700 | 26OCT2020 09:54 | LY3819253 700mg IV           |
| 10331004 | 11839860298 | 255_11839860298_323348w_NG4.fastq.gz  | R634L   | 5.621 | 765.0  | 1445.9615384615400 | 2.53 | NPH | 3.0   | 2 | 700 | 26OCT2020 09:54 | LY3819253 700mg IV           |
| 10331004 | 11839860298 | 255_11839860298_323348w_NG4.fastq.gz  | S637F   | 2.872 | 766.0  | 1445.9615384615400 | 2.53 | NPH | 3.0   | 2 | 700 | 26OCT2020 09:54 | LY3819253 700mg IV           |
| 10331004 | 11839860298 | 255_11839860298_323348w_NG4.fastq.gz  | N751D   | 3.321 | 271.0  | 1445.9615384615400 | 2.53 | NPH | 3.0   | 2 | 700 | 26OCT2020 09:54 | LY3819253 700mg IV           |
| 10331004 | 11839860298 | 255_11839860298_323348w_NG4.fastq.gz  | D796Y   | 2.899 | 414.0  | 1445.9615384615400 | 2.53 | NPH | 3.0   | 2 | 700 | 26OCT2020 09:54 | LY3819253 700mg IV           |
| 10411001 | 11835726660 | C3_11835726660_324017w_AH3.fastq.gz   | A684S   | 1.562 | 1793.0 | 3207.3736263736300 | 4.38 | NPH | 3.0   | 2 | 700 | 09NOV2020 12:00 | Placebo for LY3819253 700 mg |
| 10051004 | 11835722062 | C8_11835722062_324017w_AH8.fastq.gz   | V433I   | 1.565 | 6644.0 | 1987.7214111922100 | 4.22 | NAS | 3.0   | 2 | 700 | 23OCT2020 09:41 | LY3819253 700mg IV           |
| 10051004 | 11835722062 | C8_11835722062_324017w_AH8.fastq.gz   | E484K   | 7.552 | 3178.0 | 1987.7214111922100 | 4.22 | NAS | 3.0   | 2 | 700 | 23OCT2020 09:41 | LY3819253 700mg IV           |
| 10051004 | 11835722062 | C8_11835722062_324017w_AH8.fastq.gz   | G485V   | 1.618 | 3214.0 | 1987.7214111922100 | 4.22 | NAS | 3.0   | 2 | 700 | 23OCT2020 09:41 | LY3819253 700mg IV           |
| 10051004 | 11835722062 | C8_11835722062_324017w_AH8.fastq.gz   | K786R   | 1.121 | 892.0  | 1987.7214111922100 | 4.22 | NAS | 3.0   | 2 | 700 | 23OCT2020 09:41 | LY3819253 700mg IV           |
| 10421011 | 11818943495 | A10_11818943495_324017w_AF10.fastq.gz | L5F     | 1.933 | 7294.0 | 3583.41162514828   | 3.81 | NPH | 3.0   | 2 | 700 | 02NOV2020 12:41 | Placebo for LY3819253 700 mg |
| 10421011 | 11818943495 | A10_11818943495_324017w_AF10.fastq.gz | G35V    | 2.129 | 7423.0 | 3583.41162514828   | 3.81 | NPH | 3.0   | 2 | 700 | 02NOV2020 12:41 | Placebo for LY3819253 700 mg |
| 10421011 | 11818943495 | A10_11818943495_324017w_AF10.fastq.gz | A67V    | 1.934 | 4241.0 | 3583.41162514828   | 3.81 | NPH | 3.0   | 2 | 700 | 02NOV2020 12:41 | Placebo for LY3819253 700 mg |
| 10421011 | 11818943495 | A10_11818943495_324017w_AF10.fastq.gz | G72R    | 1.221 | 3849.0 | 3583.41162514828   | 3.81 | NPH | 3.0   | 2 | 700 | 02NOV2020 12:41 | Placebo for LY3819253 700 mg |
| 10421011 | 11818943495 | A10_11818943495_324017w_AF10.fastq.gz | S98F    | 2.049 | 2636.0 | 3583.41162514828   | 3.81 | NPH | 3.0   | 2 | 700 | 02NOV2020 12:41 | Placebo for LY3819253 700 mg |
| 10421011 | 11818943495 | A10_11818943495_324017w_AF10.fastq.gz | S116P   | 1.532 | 2284.0 | 3583.41162514828   | 3.81 | NPH | 3.0   | 2 | 700 | 02NOV2020 12:41 | Placebo for LY3819253 700 mg |
| 10421011 | 11818943495 | A10_11818943495_324017w_AF10.fastq.gz | L189F   | 1.164 | 2578.0 | 3583.41162514828   | 3.81 | NPH | 3.0</ |   |     |                 |                              |

|          |             |                                       |         |        |        |                    |      |     |     |   |     |                 |                              |
|----------|-------------|---------------------------------------|---------|--------|--------|--------------------|------|-----|-----|---|-----|-----------------|------------------------------|
| 10421011 | 11818943495 | A10_11818943495_324017w_AF10.fastq.gz | R577L   | 1.197  | 2256.0 | 3583.41162514828   | 3.81 | NPH | 3.0 | 2 | 700 | 02NOV2020 12:41 | Placebo for LY3819253 700 mg |
| 10421011 | 11818943495 | A10_11818943495_324017w_AF10.fastq.gz | E583D   | 2.598  | 2117.0 | 3583.41162514828   | 3.81 | NPH | 3.0 | 2 | 700 | 02NOV2020 12:41 | Placebo for LY3819253 700 mg |
| 10421011 | 11818943495 | A10_11818943495_324017w_AF10.fastq.gz | S591F   | 2.472  | 2063.0 | 3583.41162514828   | 3.81 | NPH | 3.0 | 2 | 700 | 02NOV2020 12:41 | Placebo for LY3819253 700 mg |
| 10421011 | 11818943495 | A10_11818943495_324017w_AF10.fastq.gz | Q644_   | 1.098  | 2004.0 | 3583.41162514828   | 3.81 | NPH | 3.0 | 2 | 700 | 02NOV2020 12:41 | Placebo for LY3819253 700 mg |
| 10421011 | 11818943495 | A10_11818943495_324017w_AF10.fastq.gz | S659P   | 2.021  | 1930.0 | 3583.41162514828   | 3.81 | NPH | 3.0 | 2 | 700 | 02NOV2020 12:41 | Placebo for LY3819253 700 mg |
| 10421011 | 11818943495 | A10_11818943495_324017w_AF10.fastq.gz | A706V   | 2.124  | 2448.0 | 3583.41162514828   | 3.81 | NPH | 3.0 | 2 | 700 | 02NOV2020 12:41 | Placebo for LY3819253 700 mg |
| 10421011 | 11818943495 | A10_11818943495_324017w_AF10.fastq.gz | K733N   | 1.287  | 1943.0 | 3583.41162514828   | 3.81 | NPH | 3.0 | 2 | 700 | 02NOV2020 12:41 | Placebo for LY3819253 700 mg |
| 10421011 | 11818943495 | A10_11818943495_324017w_AF10.fastq.gz | S746P   | 1.393  | 1508.0 | 3583.41162514828   | 3.81 | NPH | 3.0 | 2 | 700 | 02NOV2020 12:41 | Placebo for LY3819253 700 mg |
| 10421011 | 11818943495 | A10_11818943495_324017w_AF10.fastq.gz | R765C   | 1.765  | 850.0  | 3583.41162514828   | 3.81 | NPH | 3.0 | 2 | 700 | 02NOV2020 12:41 | Placebo for LY3819253 700 mg |
| 10891004 | 11808470723 | F4_11808470723_323524w_BF4.fastq.gz   | P9T     | 1.979  | 4852.0 | 1352.2156862745100 | 3.67 | NPH | 3.0 | 2 | 700 | 16NOV2020 13:40 | LY3819253 700mg IV           |
| 10891004 | 11808470723 | F4_11808470723_323524w_BF4.fastq.gz   | L249F   | 2.108  | 1091.0 | 1352.2156862745100 | 3.67 | NPH | 3.0 | 2 | 700 | 16NOV2020 13:40 | LY3819253 700mg IV           |
| 10891004 | 11808470723 | F4_11808470723_323524w_BF4.fastq.gz   | F559S   | 1.059  | 1133.0 | 1352.2156862745100 | 3.67 | NPH | 3.0 | 2 | 700 | 16NOV2020 13:40 | LY3819253 700mg IV           |
| 10891004 | 11808470723 | F4_11808470723_323524w_BF4.fastq.gz   | A647S   | 1.31   | 992.0  | 1352.2156862745100 | 3.67 | NPH | 3.0 | 2 | 700 | 16NOV2020 13:40 | LY3819253 700mg IV           |
| 10891007 | 11808472776 | G4_11808472776_323524w_BG4.fastq.gz   | Q218_   | 3.989  | 1128.0 | 1320.8498789346200 | 3.87 | NPH | 3.0 | 2 | 700 | 19NOV2020 08:36 | Placebo for LY3819253 700 mg |
| 10891007 | 11808472776 | G4_11808472776_323524w_BG4.fastq.gz   | T299I   | 3.783  | 1216.0 | 1320.8498789346200 | 3.87 | NPH | 3.0 | 2 | 700 | 19NOV2020 08:36 | Placebo for LY3819253 700 mg |
| 10891007 | 11808472776 | G4_11808472776_323524w_BG4.fastq.gz   | Q321_   | 4.954  | 1191.0 | 1320.8498789346200 | 3.87 | NPH | 3.0 | 2 | 700 | 19NOV2020 08:36 | Placebo for LY3819253 700 mg |
| 10891007 | 11808472776 | G4_11808472776_323524w_BG4.fastq.gz   | P322L   | 7.173  | 1185.0 | 1320.8498789346200 | 3.87 | NPH | 3.0 | 2 | 700 | 19NOV2020 08:36 | Placebo for LY3819253 700 mg |
| 10891007 | 11808472776 | G4_11808472776_323524w_BG4.fastq.gz   | V401L   | 3.177  | 1196.0 | 1320.8498789346200 | 3.87 | NPH | 3.0 | 2 | 700 | 19NOV2020 08:36 | Placebo for LY3819253 700 mg |
| 10891007 | 11808472776 | G4_11808472776_323524w_BG4.fastq.gz   | G482V   | 2.572  | 1283.0 | 1320.8498789346200 | 3.87 | NPH | 3.0 | 2 | 700 | 19NOV2020 08:36 | Placebo for LY3819253 700 mg |
| 10891007 | 11808472776 | G4_11808472776_323524w_BG4.fastq.gz   | T573I   | 4.103  | 1170.0 | 1320.8498789346200 | 3.87 | NPH | 3.0 | 2 | 700 | 19NOV2020 08:36 | Placebo for LY3819253 700 mg |
| 10891007 | 11808472776 | G4_11808472776_323524w_BG4.fastq.gz   | R646C   | 3.362  | 922.0  | 1320.8498789346200 | 3.87 | NPH | 3.0 | 2 | 700 | 19NOV2020 08:36 | Placebo for LY3819253 700 mg |
| 10891007 | 11808472776 | G4_11808472776_323524w_BG4.fastq.gz   | I670del | 1.467  | 750.0  | 1320.8498789346200 | 3.87 | NPH | 3.0 | 2 | 700 | 19NOV2020 08:36 | Placebo for LY3819253 700 mg |
| 10891007 | 11808472776 | G4_11808472776_323524w_BG4.fastq.gz   | C671del | 1.419  | 775.0  | 1320.8498789346200 | 3.87 | NPH | 3.0 | 2 | 700 | 19NOV2020 08:36 | Placebo for LY3819253 700 mg |
| 10891007 | 11808472776 | G4_11808472776_323524w_BG4.fastq.gz   | A672del | 1.407  | 782.0  | 1320.8498789346200 | 3.87 | NPH | 3.0 | 2 | 700 | 19NOV2020 08:36 | Placebo for LY3819253 700 mg |
| 10891007 | 11808472776 | G4_11808472776_323524w_BG4.fastq.gz   | S673del | 1.461  | 753.0  | 1320.8498789346200 | 3.87 | NPH | 3.0 | 2 | 700 | 19NOV2020 08:36 | Placebo for LY3819253 700 mg |
| 10891007 | 11808472776 | G4_11808472776_323524w_BG4.fastq.gz   | T732I   | 3.056  | 589.0  | 1320.8498789346200 | 3.87 | NPH | 3.0 | 2 | 700 | 19NOV2020 08:36 | Placebo for LY3819253 700 mg |
| 10061007 | 11804259910 | D5_11804259910_323524w_BD5.fastq.gz   | T95I    | 2.455  | 896.0  | 1221.2447980416200 | 5.7  | NPH | 3.0 | 2 | 700 | 11NOV2020 15:19 | Placebo for LY3819253 700 mg |
| 10061007 | 11804259910 | D5_11804259910_323524w_BD5.fastq.gz   | T108I   | 2.571  | 778.0  | 1221.2447980416200 | 5.7  | NPH | 3.0 | 2 | 700 | 11NOV2020 15:19 | Placebo for LY3819253 700 mg |
| 10061007 | 11804259910 | D5_11804259910_323524w_BD5.fastq.gz   | Y313H   | 1.99   | 1457.0 | 1221.2447980416200 | 5.7  | NPH | 3.0 | 2 | 700 | 11NOV2020 15:19 | Placebo for LY3819253 700 mg |
| 10061007 | 11804259910 | D5_11804259910_323524w_BD5.fastq.gz   | G447A   | 2.36   | 1144.0 | 1221.2447980416200 | 5.7  | NPH | 3.0 | 2 | 700 | 11NOV2020 15:19 | Placebo for LY3819253 700 mg |
| 10061007 | 11804259910 | D5_11804259910_323524w_BD5.fastq.gz   | L806F   | 1.24   | 484.0  | 1221.2447980416200 | 5.7  | NPH | 3.0 | 2 | 700 | 11NOV2020 15:19 | Placebo for LY3819253 700 mg |
| 10021007 | 11833557576 | D11_11833557576_323524w_BD11.fastq.gz | L611F   | 1.008  | 1091.0 | 1418.939024390240  | 4.74 | NPH | 3.0 | 2 | 700 | 06NOV2020 11:34 | LY3819253 700mg IV           |
| 10261030 | 11814709581 | E8_11814709581_323524w_BE8.fastq.gz   | S813N   | 2.703  | 37.0   | 1070.4983498349800 | 8.65 | NPH | 3.0 | 2 | 700 | 07NOV2020 10:16 | LY3819253 700mg IV           |
| 10131010 | 11810486474 | D4_11810486474_323524w_BD4.fastq.gz   | F817V   | 3.125  | 64.0   | 1128.581707317070  | 6.6  | NAS | 3.0 | 2 | 700 | 12NOV2020 12:51 | Placebo for LY3819253 700 mg |
| 10081006 | 11837820678 | C9_11837820678_323524w_BC9.fastq.gz   | G485V   | 2.047  | 977.0  | 1001.6523341523300 | 3.23 | NPH | 3.0 | 2 | 700 | 02NOV2020 07:55 | LY3819253 700mg IV           |
| 10511008 | 11800097285 | B4_11800097285_323524w_BB4.fastq.gz   | N61I    | 7.738  | 2184.0 | 1030.4700122399000 | 3.18 | NPH | 3.0 | 2 | 700 | 26OCT2020 12:45 | LY3819253 700mg IV           |
| 10511008 | 11800097285 | B4_11800097285_323524w_BB4.fastq.gz   | Q564_   | 10.496 | 867.0  | 1030.4700122399000 | 3.18 | NPH | 3.0 | 2 | 700 | 26OCT2020 12:45 | LY3819253 700mg IV           |
| 10011017 | 11823139334 | C1_11823139334_323524w_BC1.fastq.gz   | P330S   | 17.873 | 884.0  | 916.6719901719900  | 2.49 | NPH | 3.0 | 2 | 700 | 06NOV2020 08:25 | LY3819253 700mg IV           |
| 10311012 | 11816778637 | H5_11816778637_323524w_BH5.fastq.gz   | P9S     | 1.852  | 3455.0 | 1199.8882063882100 | 4.81 | NPH | 3.0 | 2 | 700 | 16NOV2020 13:56 | Placebo for LY3819253 700 mg |
| 10891003 | 11835748291 | E10_11835748291_323524w_BE10.fastq.gz | S813I   | 7.143  | 14.0   | 1190.4463414634100 | 5.37 | NPH | 3.0 | 2 | 700 | 09NOV2020 14:32 | Placebo for LY3819253 700 mg |
| 10891003 | 11835748291 | E10_11835748291_323524w_BE10.fastq.gz | K814M   | 7.692  | 13.0   | 1190.4463414634100 | 5.37 | NPH | 3.0 | 2 | 700 | 09NOV2020 14:32 | Placebo for LY3819253 700 mg |
| 11061003 | 11820991566 | E5_11820991566_323524w_BE5.fastq.gz   | V193E   | 1.887  | 53.0   | 759.0542452830190  | 6.67 | NPH | 3.0 | 2 | 700 | 06NOV2020 14:00 | Placebo for LY3819253 700 mg |
| 11061003 | 11820991566 | E5_11820991566_323524w_BE5.fastq.gz   | I197V   | 1.852  | 54.0   | 759.0542452830190  | 6.67 | NPH | 3.0 | 2 | 700 | 06NOV2020 14:00 | Placebo for LY3819253 700 mg |
| 11061003 | 11820991566 | E5_11820991566_323524w_BE5.fastq.gz   | I203L   | 1.695  | 59.0   | 759.0542452830190  | 6.67 | NPH | 3.0 | 2 | 700 | 06NOV2020 14:00 | Placebo for LY3819253 700 mg |
| 11061003 | 11820991566 | E5_11820991566_323524w_BE5.fastq.gz   | V213A   | 1.538  | 65.0   | 759.0542452830190  | 6.67 | NPH | 3.0 | 2 | 700 | 06NOV2020 14:00 | Placebo for LY3819253 700 mg |
| 11061003 | 11820991566 | E5_11820991566_323524w_BE5.fastq.gz   | E224D   | 1.639  | 61.0   | 759.0542452830190  | 6.67 | NPH | 3.0 | 2 | 700 | 06NOV2020 14:00 | Placebo for LY3819253 700 mg |
| 11061003 | 11820991566 | E5_11820991566_323524w_BE5.fastq.gz   | S247R   | 4.348  | 23.0   | 759.0542452830190  | 6.67 | NPH | 3.0 | 2 | 700 | 06NOV2020 14:00 | Placebo for LY3819253 700 mg |
| 11061003 | 11820991566 | E5_11820991566_323524w_BE5.fastq.gz   | V267E   | 4.167  | 24.0   | 759.0542452830190  | 6.67 | NPH | 3.0 | 2 | 700 | 06NOV2020 14:00 | Placebo for LY3819253 700 mg |
| 11061003 | 11820991566 | E5_11820991566_323524w_BE5.fastq.gz   | G268S   | 4.167  | 24.0   | 759.0542452830190  | 6.67 | NPH | 3.0 | 2 | 700 | 06NOV2020 14:00 | Placebo for LY3819253 700 mg |
| 11061003 | 11820991566 | E5_11820991566_323524w_BE5.fastq.gz   | F275L   | 3.333  | 30.0   | 759.0542452830190  | 6.67 | NPH | 3.0 | 2 | 700 | 06NOV2020 14:00 | Placebo for LY3819253 700 mg |
| 11061003 | 11820991566 | E5_11820991566_323524w_BE5.fastq.gz   | E281K   | 3.125  | 32.0   | 759.0542452830190  | 6.67 | NPH | 3.0 | 2 | 700 | 06NOV2020 14:00 | Placebo for LY3819253 700 mg |
| 11061003 | 11820991566 | E5_11820991566_323524w_BE5.fastq.gz   | D290V   | 3.226  | 31.0   | 759.0542452830190  | 6.67 | NPH | 3.0 | 2 | 700 | 06NOV2020 14:00 | Placebo for LY3819253 700 mg |
| 11061003 | 11820991566 | E5_11820991566_323524w_BE5.fastq.gz   | T302M   | 3.226  | 31.0   | 759.0542452830190  | 6.67 | NPH | 3.0 | 2 | 700 | 06NOV2020 14:00 | Placebo for LY3819253 700 mg |
| 11061003 | 11820991566 | E5_11820991566_323524w_BE5.fastq.gz   | T302A   | 3.226  | 31.0   | 759.0542452830190  | 6.67 | NPH | 3.0 | 2 | 700 | 06NOV2020 14:00 | Placebo for LY3819253 700 mg |
| 11061003 | 11820991566 | E5_11820991566_323524w_BE5.fastq.gz   | N354D   | 4.348  | 23.0   | 759.0542452830190  | 6.67 | NPH | 3.0 | 2 | 700 | 06NOV2020 14:00 | Placebo for LY3819253 700 mg |
| 11061003 | 11820991566 | E5_11820991566_323524w_BE5.fastq.gz   | V362A   | 5.0    | 20.0   | 759.0542452830190  | 6.67 | NPH | 3.0 | 2 | 700 | 06NOV2020 14:00 | Placebo for LY3819253 700 mg |
| 11061003 | 11820991566 | E5_11820991566_323524w_BE5.fastq.gz   | V401G   | 1.205  | 83.0   | 759.0542452830190  | 6.67 | NPH | 3.0 | 2 | 700 | 06NOV2020 14:00 | Placebo for LY3819253 700 mg |
| 11061003 | 11820991566 | E5_11820991566_323524w_BE5.fastq.gz   | E406_   | 1.099  | 91.0   | 759.0542452830190  | 6.67 | NPH | 3.0 | 2 | 700 | 06NOV2020 14:00 | Placebo for LY3819253 700 mg |
| 11061003 | 11820991566 | E5_11820991566_323524w_BE5.fastq.gz   | K417R   | 1.01   | 99.0   | 759.0542452830190  | 6.67 | NPH | 3.0 | 2 | 700 | 06NOV2020 14:00 | Placebo for LY3819253 700 mg |
| 11061003 | 11820991566 | E5_11820991566_323524w_BE5.fastq.gz   | L425F   | 1.099  | 91.0   | 759.0542452830190  | 6.67 | NPH | 3.0 | 2 | 700 | 06NOV2020 14:00 | Placebo for LY3819253 700 mg |
| 11061003 | 11820991566 | E5_11820991566_323524w_BE5.fastq.gz   | G652E   | 4.695  | 213.0  | 759.0542452830190  | 6.67 | NPH | 3.0 | 2 | 700 | 06NOV2020 14:00 | Placebo for LY3819253 700 mg |
| 11061003 | 11820991566 | E5_11820991566_323524w_BE5.fastq.gz   | P665del | 2.326  | 172.0  | 759.0542452830190  | 6.67 | NPH | 3.0 | 2 | 700 | 06NOV2020 14:00 | Placebo for LY3819253 700 mg |
| 11061003 | 11820991566 | E5_11820991566_323524w_BE5.fastq.gz   | I666del | 2.41   | 166.0  | 759.0542452830190  | 6.67 | NPH | 3.0 | 2 | 700 | 06NOV2020 14:00 | Placebo for LY3819253 700 mg |
| 11061003 | 11820991566 | E5_11820991566_323524w_BE5.fastq.gz   | G667del | 2.367  | 169.0  | 759.0542452830190  | 6.67 | NPH | 3.0 | 2 | 700 | 06NOV2020 14:00 | Placebo for LY3819253 700 mg |
| 11061003 | 11820991566 | E5_11820991566                        |         |        |        |                    |      |     |     |   |     |                 |                              |

|          |             |                                       |         |        |        |                    |      |     |     |   |     |                 |                              |
|----------|-------------|---------------------------------------|---------|--------|--------|--------------------|------|-----|-----|---|-----|-----------------|------------------------------|
| 10421007 | 11850420738 | D12_11850420738_323524w_BD12.fastq.gz | A67V    | 1.956  | 1329.0 | 858.773607748184   | 4.3  | NPH | 3.0 | 2 | 700 | 19OCT2020 13:06 | Placebo for LY3819253 700 mg |
| 10421007 | 11850420738 | D12_11850420738_323524w_BD12.fastq.gz | P174L   | 1.458  | 686.0  | 858.773607748184   | 4.3  | NPH | 3.0 | 2 | 700 | 19OCT2020 13:06 | Placebo for LY3819253 700 mg |
| 10421007 | 11850420738 | D12_11850420738_323524w_BD12.fastq.gz | L216F   | 1.304  | 690.0  | 858.773607748184   | 4.3  | NPH | 3.0 | 2 | 700 | 19OCT2020 13:06 | Placebo for LY3819253 700 mg |
| 10421007 | 11850420738 | D12_11850420738_323524w_BD12.fastq.gz | Y279N   | 1.771  | 734.0  | 858.773607748184   | 4.3  | NPH | 3.0 | 2 | 700 | 19OCT2020 13:06 | Placebo for LY3819253 700 mg |
| 10421007 | 11850420738 | D12_11850420738_323524w_BD12.fastq.gz | S297L   | 1.2    | 750.0  | 858.773607748184   | 4.3  | NPH | 3.0 | 2 | 700 | 19OCT2020 13:06 | Placebo for LY3819253 700 mg |
| 10421007 | 11850420738 | D12_11850420738_323524w_BD12.fastq.gz | F318L   | 1.34   | 746.0  | 858.773607748184   | 4.3  | NPH | 3.0 | 2 | 700 | 19OCT2020 13:06 | Placebo for LY3819253 700 mg |
| 10421007 | 11850420738 | D12_11850420738_323524w_BD12.fastq.gz | F342L   | 1.127  | 710.0  | 858.773607748184   | 4.3  | NPH | 3.0 | 2 | 700 | 19OCT2020 13:06 | Placebo for LY3819253 700 mg |
| 10421007 | 11850420738 | D12_11850420738_323524w_BD12.fastq.gz | P463S   | 1.055  | 758.0  | 858.773607748184   | 4.3  | NPH | 3.0 | 2 | 700 | 19OCT2020 13:06 | Placebo for LY3819253 700 mg |
| 10421007 | 11850420738 | D12_11850420738_323524w_BD12.fastq.gz | G545A   | 1.168  | 685.0  | 858.773607748184   | 4.3  | NPH | 3.0 | 2 | 700 | 19OCT2020 13:06 | Placebo for LY3819253 700 mg |
| 10421007 | 11850420738 | D12_11850420738_323524w_BD12.fastq.gz | T547I   | 1.178  | 679.0  | 858.773607748184   | 4.3  | NPH | 3.0 | 2 | 700 | 19OCT2020 13:06 | Placebo for LY3819253 700 mg |
| 10421007 | 11850420738 | D12_11850420738_323524w_BD12.fastq.gz | S591F   | 1.413  | 637.0  | 858.773607748184   | 4.3  | NPH | 3.0 | 2 | 700 | 19OCT2020 13:06 | Placebo for LY3819253 700 mg |
| 10421007 | 11850420738 | D12_11850420738_323524w_BD12.fastq.gz | S735L   | 2.232  | 717.0  | 858.773607748184   | 4.3  | NPH | 3.0 | 2 | 700 | 19OCT2020 13:06 | Placebo for LY3819253 700 mg |
| 10011023 | 11818960584 | C6_11818960584_323524w_BC6.fastq.gz   | S708T   | 2.257  | 886.0  | 1154.018270401950  | 6.33 | NAS | 3.0 | 2 | 700 | 16NOV2020 11:13 | Placebo for LY3819253 700 mg |
| 10011023 | 11818960584 | C6_11818960584_323524w_BC6.fastq.gz   | S816P   | 5.263  | 19.0   | 1154.018270401950  | 6.33 | NAS | 3.0 | 2 | 700 | 16NOV2020 11:13 | Placebo for LY3819253 700 mg |
| 10561003 | 11839942464 | F8_11839942464_323524w_BF8.fastq.gz   | P809S   | 2.099  | 667.0  | 1254.4604141291100 | 6.19 | NPH | 3.0 | 2 | 700 | 29OCT2020 08:58 | Placebo for LY3819253 700 mg |
| 10561003 | 11839942464 | F8_11839942464_323524w_BF8.fastq.gz   | K814E   | 2.222  | 45.0   | 1254.4604141291100 | 6.19 | NPH | 3.0 | 2 | 700 | 29OCT2020 08:58 | Placebo for LY3819253 700 mg |
| 10421009 | 11821068046 | E1_11821068046_323524w_BE1.fastq.gz   | S297L   | 1.422  | 844.0  | 836.6996336996340  | 5.42 | NPH | 3.0 | 2 | 700 | 26OCT2020 13:22 | Placebo for LY3819253 700 mg |
| 10511010 | 11800032270 | B3_11800032270_323524w_BB3.fastq.gz   | S31F    | 1.302  | 3226.0 | 1051.940243902440  | 3.44 | NPH | 3.0 | 2 | 700 | 26OCT2020 09:47 | Placebo for LY3819253 700 mg |
| 10511010 | 11800032270 | B3_11800032270_323524w_BB3.fastq.gz   | V47L    | 1.235  | 2592.0 | 1051.940243902440  | 3.44 | NPH | 3.0 | 2 | 700 | 26OCT2020 09:47 | Placebo for LY3819253 700 mg |
| 10511010 | 11800032270 | B3_11800032270_323524w_BB3.fastq.gz   | D53N    | 9.016  | 2318.0 | 1051.940243902440  | 3.44 | NPH | 3.0 | 2 | 700 | 26OCT2020 09:47 | Placebo for LY3819253 700 mg |
| 10511010 | 11800032270 | B3_11800032270_323524w_BB3.fastq.gz   | S151I   | 3.187  | 910.0  | 1051.940243902440  | 3.44 | NPH | 3.0 | 2 | 700 | 26OCT2020 09:47 | Placebo for LY3819253 700 mg |
| 10511010 | 11800032270 | B3_11800032270_323524w_BB3.fastq.gz   | V433A   | 1.561  | 1025.0 | 1051.940243902440  | 3.44 | NPH | 3.0 | 2 | 700 | 26OCT2020 09:47 | Placebo for LY3819253 700 mg |
| 10511010 | 11800032270 | B3_11800032270_323524w_BB3.fastq.gz   | S469L   | 6.172  | 1037.0 | 1051.940243902440  | 3.44 | NPH | 3.0 | 2 | 700 | 26OCT2020 09:47 | Placebo for LY3819253 700 mg |
| 10511010 | 11800032270 | B3_11800032270_323524w_BB3.fastq.gz   | A647V   | 2.027  | 740.0  | 1051.940243902440  | 3.44 | NPH | 3.0 | 2 | 700 | 26OCT2020 09:47 | Placebo for LY3819253 700 mg |
| 10511010 | 11800032270 | B3_11800032270_323524w_BB3.fastq.gz   | A688V   | 3.834  | 652.0  | 1051.940243902440  | 3.44 | NPH | 3.0 | 2 | 700 | 26OCT2020 09:47 | Placebo for LY3819253 700 mg |
| 10021004 | 11833555264 | A2_11833555264_323524w_BA2.fastq.gz   | T22I    | 1.232  | 3653.0 | 1164.8878048780500 | 4.91 | NPH | 3.0 | 2 | 700 | 22OCT2020 10:36 | LY3819253 700mg IV           |
| 10061008 | 11804195909 | D6_11804195909_323524w_BD6.fastq.gz   | G181_   | 19.835 | 968.0  | 1171.6402439024400 | 3.03 | NPH | 3.0 | 2 | 700 | 13NOV2020 14:32 | LY3819253 700mg IV           |
| 10201008 | 11850339080 | A5_11850339080_323524w_BA5.fastq.gz   | K814N   | 16.667 | 6.0    | 1330.621951219510  | 5.44 | NPH | 3.0 | 2 | 700 | 22OCT2020 08:23 | LY3819253 700mg IV           |
| 10031024 | 11852446670 | C3_11852446670_323524w_BC3.fastq.gz   | W152L   | 4.08   | 1152.0 | 1316.7924297924300 | 4.93 | NPH | 3.0 | 2 | 700 | 13NOV2020 08:57 | Placebo for LY3819253 700 mg |
| 10311011 | 11816778639 | H6_11816778639_323524w_BH6.fastq.gz   | Q271_   | 11.372 | 809.0  | 953.7647058823530  | 3.45 | NPH | 3.0 | 2 | 700 | 16NOV2020 10:01 | LY3819253 700mg IV           |
| 10311011 | 11816778639 | H6_11816778639_323524w_BH6.fastq.gz   | S591F   | 6.459  | 898.0  | 953.7647058823530  | 3.45 | NPH | 3.0 | 2 | 700 | 16NOV2020 10:01 | LY3819253 700mg IV           |
| 10311011 | 11816778639 | H6_11816778639_323524w_BH6.fastq.gz   | T604del | 3.947  | 760.0  | 953.7647058823530  | 3.45 | NPH | 3.0 | 2 | 700 | 16NOV2020 10:01 | LY3819253 700mg IV           |
| 10311011 | 11816778639 | H6_11816778639_323524w_BH6.fastq.gz   | A694S   | 1.044  | 479.0  | 953.7647058823530  | 3.45 | NPH | 3.0 | 2 | 700 | 16NOV2020 10:01 | LY3819253 700mg IV           |
| 10081003 | 11804201728 | B2_11804201728_323524w_BB2.fastq.gz   | G181_   | 1.262  | 713.0  | 1002.838199513380  | 5.03 | NPH | 3.0 | 2 | 700 | 15OCT2020 12:46 | Placebo for LY3819253 700 mg |
| 10081003 | 11804201728 | B2_11804201728_323524w_BB2.fastq.gz   | D420H   | 1.433  | 907.0  | 1002.838199513380  | 5.03 | NPH | 3.0 | 2 | 700 | 15OCT2020 12:46 | Placebo for LY3819253 700 mg |
| 10081003 | 11804201728 | B2_11804201728_323524w_BB2.fastq.gz   | A475S   | 1.217  | 904.0  | 1002.838199513380  | 5.03 | NPH | 3.0 | 2 | 700 | 15OCT2020 12:46 | Placebo for LY3819253 700 mg |
| 10241006 | 11800011269 | D8_11800011269_323524w_BD8.fastq.gz   | E191K   | 10.925 | 1135.0 | 1394.4447174447200 | 3.22 | NPH | 3.0 | 2 | 700 | 16NOV2020 09:42 | LY3819253 700mg IV           |
| 10241006 | 11800011269 | D8_11800011269_323524w_BD8.fastq.gz   | A352V   | 9.866  | 1419.0 | 1394.4447174447200 | 3.22 | NPH | 3.0 | 2 | 700 | 16NOV2020 09:42 | LY3819253 700mg IV           |
| 10131011 | 11810489793 | C12_11810489793_323524w_BC12.fastq.gz | G607L   | 8.307  | 313.0  | 1073.0110159118700 | 3.97 | NPH | 3.0 | 2 | 700 | 12NOV2020 13:48 | Placebo for LY3819253 700 mg |
| 10131011 | 11810489793 | C12_11810489793_323524w_BC12.fastq.gz | G744A   | 1.167  | 257.0  | 1073.0110159118700 | 3.97 | NPH | 3.0 | 2 | 700 | 12NOV2020 13:48 | Placebo for LY3819253 700 mg |
| 10561004 | 11839940417 | H2_11839940417_323524w_BH2.fastq.gz   | F186S   | 1.536  | 1107.0 | 1047.967113276490  | 7.11 | NPH | 3.0 | 2 | 700 | 29OCT2020 09:10 | Placebo for LY3819253 700 mg |
| 10561004 | 11839940417 | H2_11839940417_323524w_BH2.fastq.gz   | P809S   | 8.679  | 795.0  | 1047.967113276490  | 7.11 | NPH | 3.0 | 2 | 700 | 29OCT2020 09:10 | Placebo for LY3819253 700 mg |
| 10371008 | 11810489547 | F1_11810489547_323524w_BF1.fastq.gz   | C15F    | 4.888  | 4460.0 | 866.4914634146340  | 6.95 | NPH | 3.0 | 2 | 700 | 13NOV2020 12:25 | Placebo for LY3819253 700 mg |
| 10371008 | 11810489547 | F1_11810489547_323524w_BF1.fastq.gz   | L56F    | 1.232  | 1136.0 | 866.4914634146340  | 6.95 | NPH | 3.0 | 2 | 700 | 13NOV2020 12:25 | Placebo for LY3819253 700 mg |
| 10491001 | 11852526341 | B9_11852526341_323524w_BB9.fastq.gz   | A27V    | 4.72   | 2585.0 | 1230.8174418604700 | 7.29 | NPH | 3.0 | 2 | 700 | 30OCT2020 09:08 | Placebo for LY3819253 700 mg |
| 10491001 | 11852526341 | B9_11852526341_323524w_BB9.fastq.gz   | V785L   | 1.143  | 962.0  | 1230.8174418604700 | 7.29 | NPH | 3.0 | 2 | 700 | 30OCT2020 09:08 | Placebo for LY3819253 700 mg |
| 10561002 | 11839941185 | F7_11839941185_323524w_BF7.fastq.gz   | A701V   | 17.514 | 925.0  | 1328.6944785276100 | 2.92 | NPH | 3.0 | 2 | 700 | 26OCT2020 16:08 | LY3819253 700mg IV           |
| 10561002 | 11839941185 | F7_11839941185_323524w_BF7.fastq.gz   | L752P   | 14.919 | 496.0  | 1328.6944785276100 | 2.92 | NPH | 3.0 | 2 | 700 | 26OCT2020 16:08 | LY3819253 700mg IV           |
| 10031018 | 11835674764 | B1_11835674764_323524w_BB1.fastq.gz   | H69Y    | 1.28   | 1250.0 | 871.4106925880920  | 6.05 | NPH | 3.0 | 2 | 700 | 26OCT2020 12:27 | Placebo for LY3819253 700 mg |
| 10031018 | 11835674764 | B1_11835674764_323524w_BB1.fastq.gz   | P139T   | 1.946  | 771.0  | 871.4106925880920  | 6.05 | NPH | 3.0 | 2 | 700 | 26OCT2020 12:27 | Placebo for LY3819253 700 mg |
| 10031018 | 11835674764 | B1_11835674764_323524w_BB1.fastq.gz   | P217H   | 1.479  | 541.0  | 871.4106925880920  | 6.05 | NPH | 3.0 | 2 | 700 | 26OCT2020 12:27 | Placebo for LY3819253 700 mg |
| 10031018 | 11835674764 | B1_11835674764_323524w_BB1.fastq.gz   | L387F   | 2.463  | 609.0  | 871.4106925880920  | 6.05 | NPH | 3.0 | 2 | 700 | 26OCT2020 12:27 | Placebo for LY3819253 700 mg |
| 10031018 | 11835674764 | B1_11835674764_323524w_BB1.fastq.gz   | T478K   | 2.313  | 562.0  | 871.4106925880920  | 6.05 | NPH | 3.0 | 2 | 700 | 26OCT2020 12:27 | Placebo for LY3819253 700 mg |
| 10421012 | 11821062151 | 16_11821062151_323232w_AB4.fastq.gz   | L441F   | 12.072 | 3239.0 | 3298.5815950920200 | 3.29 | NPH | 3.0 | 2 | 700 | 03NOV2020 11:11 | LY3819253 700mg IV           |
| 10021008 | 11833557066 | 77_11833557066_323232w_AG5.fastq.gz   | Y28D    | 17.396 | 5076.0 | 1583.1660561660600 | 2.58 | NPH | 3.0 | 2 | 700 | 16NOV2020 09:27 | LY3819253 700mg IV           |
| 10021008 | 11833557066 | 77_11833557066_323232w_AG5.fastq.gz   | R44G    | 1.224  | 4086.0 | 1583.1660561660600 | 2.58 | NPH | 3.0 | 2 | 700 | 16NOV2020 09:27 | LY3819253 700mg IV           |
| 10021008 | 11833557066 | 77_11833557066_323232w_AG5.fastq.gz   | Y265H   | 17.785 | 1535.0 | 1583.1660561660600 | 2.58 | NPH | 3.0 | 2 | 700 | 16NOV2020 09:27 | LY3819253 700mg IV           |
| 10021008 | 11833557066 | 77_11833557066_323232w_AG5.fastq.gz   | F329S   | 16.742 | 1541.0 | 1583.1660561660600 | 2.58 | NPH | 3.0 | 2 | 700 | 16NOV2020 09:27 | LY3819253 700mg IV           |
| 10021008 | 11833557066 | 77_11833557066_323232w_AG5.fastq.gz   | G482V   | 16.195 | 1624.0 | 1583.1660561660600 | 2.58 | NPH | 3.0 | 2 | 700 | 16NOV2020 09:27 | LY3819253 700mg IV           |
| 10021008 | 11833557066 | 77_11833557066_323232w_AG5.fastq.gz   | E484_   | 12.485 | 1666.0 | 1583.1660561660600 | 2.58 | NPH | 3.0 | 2 | 700 | 16NOV2020 09:27 | LY3819253 700mg IV           |
| 10561006 | 11812650826 | 48_11812650826_323232w_AD12.fastq.gz  | V130L   | 5.153  | 1863.0 | 2175.6159509202500 | 2.49 | NPH | 3.0 | 2 | 700 | 09NOV2020 10:58 | LY3819253 700mg IV           |
| 10561006 | 11812650826 | 48_11812650826_323232w_AD12.fastq.gz  | E154K   | 6.017  | 1961.0 | 2175.6159509202500 | 2.49 | NPH | 3.0 | 2 | 700 | 09NOV2020 10:58 | LY3819253 700mg IV           |
| 10561006 | 11812650826 | 48_11812650826_323232w_AD12.fastq.gz  | G181A   | 2.582  | 2091.0 | 2175.6159509202500 | 2.49 | NPH | 3.0 | 2 | 700 | 09NOV2020 10:58 | LY3819253 700mg IV           |
| 10031025 | 11856712845 | 60_11856712845_323232w_AE12.fastq.gz  | P330S   | 7.136  | 2214.0 | 2206.7396593674000 | 2.7  | NAS | 3.0 | 2 | 700 | 13NOV2020 12:18 | LY3819253 700mg IV           |
| 10031025 | 11          |                                       |         |        |        |                    |      |     |     |   |     |                 |                              |

|          |             |                                      |         |        |         |                    |      |     |     |     |     |                 |                              |
|----------|-------------|--------------------------------------|---------|--------|---------|--------------------|------|-----|-----|-----|-----|-----------------|------------------------------|
| 10011014 | 11823140623 | 8_40623_322851w_CA8.fastq.gz         | P9S     | 1.911  | 3819.0  | 1363.042372881360  | 3.11 | NPH | 3.0 | 2   | 700 | 23OCT2020 08:32 | LY3819253 700mg IV           |
| 10011014 | 11823140623 | 8_40623_322851w_CA8.fastq.gz         | Y91F    | 2.666  | 1463.0  | 1363.042372881360  | 3.11 | NPH | 3.0 | 2   | 700 | 23OCT2020 08:32 | LY3819253 700mg IV           |
| 10011014 | 11823140623 | 8_40623_322851w_CA8.fastq.gz         | V130A   | 2.513  | 1194.0  | 1363.042372881360  | 3.11 | NPH | 3.0 | 2   | 700 | 23OCT2020 08:32 | LY3819253 700mg IV           |
| 10011014 | 11823140623 | 8_40623_322851w_CA8.fastq.gz         | F140del | 1.85   | 1027.0  | 1363.042372881360  | 3.11 | NPH | 3.0 | 2   | 700 | 23OCT2020 08:32 | LY3819253 700mg IV           |
| 10011014 | 11823140623 | 8_40623_322851w_CA8.fastq.gz         | V320I   | 1.596  | 1128.0  | 1363.042372881360  | 3.11 | NPH | 3.0 | 2   | 700 | 23OCT2020 08:32 | LY3819253 700mg IV           |
| 10011014 | 11823140623 | 8_40623_322851w_CA8.fastq.gz         | Q564H   | 2.079  | 1058.0  | 1363.042372881360  | 3.11 | NPH | 3.0 | 2   | 700 | 23OCT2020 08:32 | LY3819253 700mg IV           |
| 10011014 | 11823140623 | 8_40623_322851w_CA8.fastq.gz         | Q644_   | 1.911  | 942.0   | 1363.042372881360  | 3.11 | NPH | 3.0 | 2   | 700 | 23OCT2020 08:32 | LY3819253 700mg IV           |
| 10011014 | 11823140623 | 8_40623_322851w_CA8.fastq.gz         | Q644R   | 1.38   | 942.0   | 1363.042372881360  | 3.11 | NPH | 3.0 | 2   | 700 | 23OCT2020 08:32 | LY3819253 700mg IV           |
| 10011014 | 11823140623 | 8_40623_322851w_CA8.fastq.gz         | E654_   | 2.174  | 920.0   | 1363.042372881360  | 3.11 | NPH | 3.0 | 2   | 700 | 23OCT2020 08:32 | LY3819253 700mg IV           |
| 10011014 | 11823140623 | 8_40623_322851w_CA8.fastq.gz         | P665del | 1.009  | 793.0   | 1363.042372881360  | 3.11 | NPH | 3.0 | 2   | 700 | 23OCT2020 08:32 | LY3819253 700mg IV           |
| 10011014 | 11823140623 | 8_40623_322851w_CA8.fastq.gz         | I666del | 1.013  | 790.0   | 1363.042372881360  | 3.11 | NPH | 3.0 | 2   | 700 | 23OCT2020 08:32 | LY3819253 700mg IV           |
| 10011014 | 11823140623 | 8_40623_322851w_CA8.fastq.gz         | S746L   | 1.773  | 1015.0  | 1363.042372881360  | 3.11 | NPH | 3.0 | 2   | 700 | 23OCT2020 08:32 | LY3819253 700mg IV           |
| 10051002 | 11835722567 | 9_22567_322851w_CA9.fastq.gz         | T415I   | 1.789  | 1565.0  | 1582.8394160583900 | 4.52 | NPH | 3.0 | 2   | 700 | 22OCT2020 11:18 | Placebo for LY3819253 700 mg |
| 10051002 | 11835722567 | 9_22567_322851w_CA9.fastq.gz         | G446V   | 2.615  | 1606.0  | 1582.8394160583900 | 4.52 | NPH | 3.0 | 2   | 700 | 22OCT2020 11:18 | Placebo for LY3819253 700 mg |
| 10051002 | 11835722567 | 9_22567_322851w_CA9.fastq.gz         | R457S   | 3.587  | 1617.0  | 1582.8394160583900 | 4.52 | NPH | 3.0 | 2   | 700 | 22OCT2020 11:18 | Placebo for LY3819253 700 mg |
| 10051002 | 11835722567 | 9_22567_322851w_CA9.fastq.gz         | S813T   | 4.762  | 21.0    | 1582.8394160583900 | 4.52 | NPH | 3.0 | 2   | 700 | 22OCT2020 11:18 | Placebo for LY3819253 700 mg |
| 10111002 | 11837818639 | 3_18639_322847w_BA3.fastq.gz         | L5F     | 1.802  | 5717.0  | 1801.6992753623200 | 2.85 | NPH | 3.0 | 2   | 700 | 05NOV2020 09:39 | LY3819253 700mg IV           |
| 10111002 | 11837818639 | 3_18639_322847w_BA3.fastq.gz         | L8S     | 1.822  | 5817.0  | 1801.6992753623200 | 2.85 | NPH | 3.0 | 2   | 700 | 05NOV2020 09:39 | LY3819253 700mg IV           |
| 10111002 | 11837818639 | 3_18639_322847w_BA3.fastq.gz         | H49L    | 2.109  | 4458.0  | 1801.6992753623200 | 2.85 | NPH | 3.0 | 2   | 700 | 05NOV2020 09:39 | LY3819253 700mg IV           |
| 10111002 | 11837818639 | 3_18639_322847w_BA3.fastq.gz         | S98F    | 1.107  | 1806.0  | 1801.6992753623200 | 2.85 | NPH | 3.0 | 2   | 700 | 05NOV2020 09:39 | LY3819253 700mg IV           |
| 10111002 | 11837818639 | 3_18639_322847w_BA3.fastq.gz         | P139S   | 1.697  | 1473.0  | 1801.6992753623200 | 2.85 | NPH | 3.0 | 2   | 700 | 05NOV2020 09:39 | LY3819253 700mg IV           |
| 10111002 | 11837818639 | 3_18639_322847w_BA3.fastq.gz         | S221L   | 1.828  | 1586.0  | 1801.6992753623200 | 2.85 | NPH | 3.0 | 2   | 700 | 05NOV2020 09:39 | LY3819253 700mg IV           |
| 10111002 | 11837818639 | 3_18639_322847w_BA3.fastq.gz         | P337S   | 1.333  | 1651.0  | 1801.6992753623200 | 2.85 | NPH | 3.0 | 2   | 700 | 05NOV2020 09:39 | LY3819253 700mg IV           |
| 10111002 | 11837818639 | 3_18639_322847w_BA3.fastq.gz         | V395A   | 1.155  | 1732.0  | 1801.6992753623200 | 2.85 | NPH | 3.0 | 2   | 700 | 05NOV2020 09:39 | LY3819253 700mg IV           |
| 10111002 | 11837818639 | 3_18639_322847w_BA3.fastq.gz         | K462E   | 2.295  | 1874.0  | 1801.6992753623200 | 2.85 | NPH | 3.0 | 2   | 700 | 05NOV2020 09:39 | LY3819253 700mg IV           |
| 10111002 | 11837818639 | 3_18639_322847w_BA3.fastq.gz         | N481I   | 1.319  | 1820.0  | 1801.6992753623200 | 2.85 | NPH | 3.0 | 2   | 700 | 05NOV2020 09:39 | LY3819253 700mg IV           |
| 10111002 | 11837818639 | 3_18639_322847w_BA3.fastq.gz         | V483F   | 1.727  | 1853.0  | 1801.6992753623200 | 2.85 | NPH | 3.0 | 2   | 700 | 05NOV2020 09:39 | LY3819253 700mg IV           |
| 10111002 | 11837818639 | 3_18639_322847w_BA3.fastq.gz         | P579L   | 2.373  | 1517.0  | 1801.6992753623200 | 2.85 | NPH | 3.0 | 2   | 700 | 05NOV2020 09:39 | LY3819253 700mg IV           |
| 10111002 | 11837818639 | 3_18639_322847w_BA3.fastq.gz         | P621S   | 2.658  | 1392.0  | 1801.6992753623200 | 2.85 | NPH | 3.0 | 2   | 700 | 05NOV2020 09:39 | LY3819253 700mg IV           |
| 10111002 | 11837818639 | 3_18639_322847w_BA3.fastq.gz         | L650_   | 1.363  | 1247.0  | 1801.6992753623200 | 2.85 | NPH | 3.0 | 2   | 700 | 05NOV2020 09:39 | LY3819253 700mg IV           |
| 10111002 | 11837818639 | 3_18639_322847w_BA3.fastq.gz         | S735L   | 1.719  | 698.0   | 1801.6992753623200 | 2.85 | NPH | 3.0 | 2   | 700 | 05NOV2020 09:39 | LY3819253 700mg IV           |
| 10111002 | 11837818639 | 3_18639_322847w_BA3.fastq.gz         | L752P   | 1.509  | 464.0   | 1801.6992753623200 | 2.85 | NPH | 3.0 | 2   | 700 | 05NOV2020 09:39 | LY3819253 700mg IV           |
| 10311004 | 11839924233 | 51_24233_322847w_BE3.fastq.gz        | Y741H   | 1.119  | 536.0   | 1491.421375921380  | 2.82 | NPH | 3.0 | 2   | 700 | 19OCT2020 12:23 | LY3819253 700mg IV           |
| 10121005 | 11804197194 | 68_97194_322847w_BF8.fastq.gz        | F43T    | 1.077  | 4180.0  | 2106.8706411698500 | 8.15 | NPH | 3.0 | 2   | 700 | 23OCT2020 14:25 | Placebo for LY3819253 700 mg |
| 10121005 | 11804197194 | 68_97194_322847w_BF8.fastq.gz        | S735_   | 1.571  | 1337.0  | 2106.8706411698500 | 8.15 | NPH | 3.0 | 2   | 700 | 23OCT2020 14:25 | Placebo for LY3819253 700 mg |
| 10121005 | 11804197194 | 68_97194_322847w_BF8.fastq.gz        | D737N   | 1.469  | 1293.0  | 2106.8706411698500 | 8.15 | NPH | 3.0 | 2   | 700 | 23OCT2020 14:25 | Placebo for LY3819253 700 mg |
| 10121005 | 11804197194 | 68_97194_322847w_BF8.fastq.gz        | F823S   | 1.37   | 146.0   | 2106.8706411698500 | 8.15 | NPH | 3.0 | 2   | 700 | 23OCT2020 14:25 | Placebo for LY3819253 700 mg |
| 10121005 | 11804197194 | 68_97194_322847w_BF8.fastq.gz        | T859A   | 7.143  | 14.0    | 2106.8706411698500 | 8.15 | NPH | 3.0 | 2   | 700 | 23OCT2020 14:25 | Placebo for LY3819253 700 mg |
| 10031021 | 11835674765 | 13_74765_322847w_BB1.fastq.gz        | F43T    | 5.968  | 3368.0  | 1341.959090909090  | 8.32 | NPH | 3.0 | 2   | 700 | 06NOV2020 10:35 | Placebo for LY3819253 700 mg |
| 10031021 | 11835674765 | 13_74765_322847w_BB1.fastq.gz        | E819del | 4.688  | 128.0   | 1341.959090909090  | 8.32 | NPH | 3.0 | 2   | 700 | 06NOV2020 10:35 | Placebo for LY3819253 700 mg |
| 10031021 | 11835674765 | 13_74765_322847w_BB1.fastq.gz        | D820del | 4.8    | 125.0   | 1341.959090909090  | 8.32 | NPH | 3.0 | 2   | 700 | 06NOV2020 10:35 | Placebo for LY3819253 700 mg |
| 10031021 | 11835674765 | 13_74765_322847w_BB1.fastq.gz        | L821del | 3.968  | 126.0   | 1341.959090909090  | 8.32 | NPH | 3.0 | 2   | 700 | 06NOV2020 10:35 | Placebo for LY3819253 700 mg |
| 10031021 | 11835674765 | 13_74765_322847w_BB1.fastq.gz        | L822del | 1.6    | 125.0   | 1341.959090909090  | 8.32 | NPH | 3.0 | 2   | 700 | 06NOV2020 10:35 | Placebo for LY3819253 700 mg |
| 10031021 | 11835674765 | 13_74765_322847w_BB1.fastq.gz        | N824Y   | 1.562  | 128.0   | 1341.959090909090  | 8.32 | NPH | 3.0 | 2   | 700 | 06NOV2020 10:35 | Placebo for LY3819253 700 mg |
| 10031021 | 11835674765 | 13_74765_322847w_BB1.fastq.gz        | K825I   | 1.575  | 127.0   | 1341.959090909090  | 8.32 | NPH | 3.0 | 2   | 700 | 06NOV2020 10:35 | Placebo for LY3819253 700 mg |
| 10661002 | 11833576591 | D4_11833576591_324019w_CD4.fastq.gz  | K424I   | 1.23   | 10000.0 | 2233.3530805687200 | 6.87 | NPH | 3.0 | 2   | 700 | 16NOV2020 14:30 | LY3819253 700mg IV           |
| 10661002 | 11833576591 | D4_11833576591_324019w_CD4.fastq.gz  | K786R   | 7.664  | 535.0   | 2233.3530805687200 | 6.87 | NPH | 3.0 | 2   | 700 | 16NOV2020 14:30 | LY3819253 700mg IV           |
| 10661002 | 11833576591 | D4_11833576591_324019w_CD4.fastq.gz  | S816_   | 1.786  | 56.0    | 2233.3530805687200 | 6.87 | NPH | 3.0 | 2   | 700 | 16NOV2020 14:30 | LY3819253 700mg IV           |
| 10221006 | 11839869196 | G6_11839869196_324019w_CG6.fastq.gz  | A344V   | 3.824  | 2615.0  | 2204.429963459200  | 3.21 | NAS | 3.0 | 2   | 700 | 30OCT2020 07:53 | LY3819253 700mg IV           |
| 10221006 | 11839869196 | G6_11839869196_324019w_CG6.fastq.gz  | E484K   | 9.261  | 3358.0  | 2204.429963459200  | 3.21 | NAS | 3.0 | 2   | 700 | 30OCT2020 07:53 | LY3819253 700mg IV           |
| 10221006 | 11839869196 | G6_11839869196_324019w_CG6.fastq.gz  | Y508H   | 9.16   | 2915.0  | 2204.429963459200  | 3.21 | NAS | 3.0 | 2   | 700 | 30OCT2020 07:53 | LY3819253 700mg IV           |
| 10221006 | 11839869196 | G6_11839869196_324019w_CG6.fastq.gz  | L546F   | 1.076  | 1765.0  | 2204.429963459200  | 3.21 | NAS | 3.0 | 2   | 700 | 30OCT2020 07:53 | LY3819253 700mg IV           |
| 10221006 | 11839869196 | G6_11839869196_324019w_CG6.fastq.gz  | G601E   | 6.217  | 1142.0  | 2204.429963459200  | 3.21 | NAS | 3.0 | 2   | 700 | 30OCT2020 07:53 | LY3819253 700mg IV           |
| 10221006 | 11839869196 | G6_11839869196_324019w_CG6.fastq.gz  | N641K   | 8.438  | 1031.0  | 2204.429963459200  | 3.21 | NAS | 3.0 | 2   | 700 | 30OCT2020 07:53 | LY3819253 700mg IV           |
| 10221006 | 11839869196 | G6_11839869196_324019w_CG6.fastq.gz  | K786R   | 1.848  | 541.0   | 2204.429963459200  | 3.21 | NAS | 3.0 | 2   | 700 | 30OCT2020 07:53 | LY3819253 700mg IV           |
| 10221004 | 11839868941 | 1_11839868941_323283w_CD11.fastq.gz  | G181A   | 7.108  | 830.0   | 785.0227790432800  | 5.6  | NPH | 3.0 | 2   | 700 | 19OCT2020 10:27 | Placebo for LY3819253 700 mg |
| 10221004 | 11839868941 | 1_11839868941_323283w_CD11.fastq.gz  | E309Q   | 6.986  | 959.0   | 785.0227790432800  | 5.6  | NPH | 3.0 | 2   | 700 | 19OCT2020 10:27 | Placebo for LY3819253 700 mg |
| 10221004 | 11839868941 | 1_11839868941_323283w_CD11.fastq.gz  | R815M   | 2.5    | 40.0    | 785.0227790432800  | 5.6  | NPH | 3.0 | 2   | 700 | 19OCT2020 10:27 | Placebo for LY3819253 700 mg |
| 10051005 | 11835722308 | 38_11835722308_323283w_CG12.fastq.gz | V36F    | 1.873  | 1602.0  | 796.612293144208   | 6.97 | NPH | 3.0 | 2   | 700 | 30OCT2020 10:15 | LY3819253 700mg IV           |
| 10051005 | 11835722308 | 38_11835722308_323283w_CG12.fastq.gz | E819del | 3.846  | 26.0    | 796.612293144208   | 6.97 | NPH | 3.0 | 2   | 700 | 30OCT2020 10:15 | LY3819253 700mg IV           |
| 10051005 | 11835722308 | 38_11835722308_323283w_CG12.fastq.gz | D820del | 4.167  | 24.0    | 796.612293144208   | 6.97 | NPH | 3.0 | 2   | 700 | 30OCT2020 10:15 | LY3819253 700mg IV           |
| 10051005 | 11835722308 | 38_11835722308_323283w_CG12.fastq.gz | L821del | 4.348  | 23.0    | 796.612293144208   | 6.97 | NPH | 3.0 | 2   | 700 | 30OCT2020 10:15 | LY3819253 700mg IV           |
| 10051005 | 11835722308 | 38_11835722308_323283w_CG12.fastq.gz | L822P   | 4.545  | 22.0    | 796.612293144208   | 6.97 | NPH | 3.0 | 2   | 700 | 30OCT2020 10:15 | LY3819253 700mg IV           |
| 10201015 | 11818961099 | 26_11818961099_323283w_CF12.fastq.gz | S12F    | 13.851 | 1906.0  | 648.4088127294980  | 2.29 | NPH | 3.0 | 2   | 700 | 02NOV2020 12:02 | LY3819253 700mg IV           |
| 10201015 | 11818961099 | 26_11818961099_323283w_CF12.fastq.gz | R44I    | 9.689  | 1672.0  | 648.4088127294980  | 2.29 | NPH | 3.0 | 2   | 700 | 02NOV2020 12:02 | LY3819253 700mg IV           |
| 10201015 | 11818961099 | 26_11818961099_323283w_CF12.fastq.gz | G283R   | 11.168 | 591.0   | 648.4088127294980  | 2.29 | NPH | 3.0 | 2</ |     |                 |                              |

|          |             |                                       |         |        |        |                    |      |     |     |   |     |                 |                              |
|----------|-------------|---------------------------------------|---------|--------|--------|--------------------|------|-----|-----|---|-----|-----------------|------------------------------|
| 10161005 | 11852509454 | 40_11852509454_323283w_CH2.fastq.gz   | G446V   | 1.452  | 620.0  | 546.6270783847980  | 5.82 | NPH | 3.0 | 2 | 700 | 02NOV2020 12:06 | Placebo for LY3819253 700 mg |
| 10371001 | 11833581571 | 45_11833581571_323283w_CH7.fastq.gz   | N501Y   | 5.435  | 644.0  | 662.4878048780490  | 5.23 | NPH | 3.0 | 2 | 700 | 02NOV2020 12:15 | LY3819253 700mg IV           |
| 10371001 | 11833581571 | 45_11833581571_323283w_CH7.fastq.gz   | G757V   | 1.105  | 181.0  | 662.4878048780490  | 5.23 | NPH | 3.0 | 2 | 700 | 02NOV2020 12:15 | LY3819253 700mg IV           |
| 10261027 | 11823099918 | 33_11823099918_323283w_CG7.fastq.gz   | F59L    | 2.147  | 1770.0 | 1038.492082825820  | 2.5  | NPH | 3.0 | 2 | 700 | 29OCT2020 10:30 | LY3819253 700mg IV           |
| 10261027 | 11823099918 | 33_11823099918_323283w_CG7.fastq.gz   | G219V   | 1.925  | 883.0  | 1038.492082825820  | 2.5  | NPH | 3.0 | 2 | 700 | 29OCT2020 10:30 | LY3819253 700mg IV           |
| 10261027 | 11823099918 | 33_11823099918_323283w_CG7.fastq.gz   | D228N   | 1.578  | 887.0  | 1038.492082825820  | 2.5  | NPH | 3.0 | 2 | 700 | 29OCT2020 10:30 | LY3819253 700mg IV           |
| 10261027 | 11823099918 | 33_11823099918_323283w_CG7.fastq.gz   | S255F   | 4.983  | 883.0  | 1038.492082825820  | 2.5  | NPH | 3.0 | 2 | 700 | 29OCT2020 10:30 | LY3819253 700mg IV           |
| 10261027 | 11823099918 | 33_11823099918_323283w_CG7.fastq.gz   | A288V   | 1.407  | 924.0  | 1038.492082825820  | 2.5  | NPH | 3.0 | 2 | 700 | 29OCT2020 10:30 | LY3819253 700mg IV           |
| 10261027 | 11823099918 | 33_11823099918_323283w_CG7.fastq.gz   | N343H   | 4.238  | 991.0  | 1038.492082825820  | 2.5  | NPH | 3.0 | 2 | 700 | 29OCT2020 10:30 | LY3819253 700mg IV           |
| 10261027 | 11823099918 | 33_11823099918_323283w_CG7.fastq.gz   | F347L   | 2.778  | 1008.0 | 1038.492082825820  | 2.5  | NPH | 3.0 | 2 | 700 | 29OCT2020 10:30 | LY3819253 700mg IV           |
| 10261027 | 11823099918 | 33_11823099918_323283w_CG7.fastq.gz   | G496V   | 3.23   | 867.0  | 1038.492082825820  | 2.5  | NPH | 3.0 | 2 | 700 | 29OCT2020 10:30 | LY3819253 700mg IV           |
| 10261027 | 11823099918 | 33_11823099918_323283w_CG7.fastq.gz   | E619_   | 8.584  | 699.0  | 1038.492082825820  | 2.5  | NPH | 3.0 | 2 | 700 | 29OCT2020 10:30 | LY3819253 700mg IV           |
| 10951003 | 11808472779 | A4_11808472779_323690w_BA4.fastq.gz   | A783V   | 1.735  | 461.0  | 1578.5325953259500 | 2.03 | NPH | 3.0 | 2 | 700 | 16NOV2020 08:20 | Placebo for LY3819253 700 mg |
| 10201008 | 11850339075 | E1_11850339075_323690w_BE1.fastq.gz   | A783V   | 1.831  | 1147.0 | 1943.436053593180  | 6.43 | NAS | 2   | 2 | 700 | 22OCT2020 08:21 | LY3819253 700mg IV           |
| 10201008 | 11850339075 | E1_11850339075_323690w_BE1.fastq.gz   | T791I   | 2.085  | 1103.0 | 1943.436053593180  | 6.43 | NAS | 2   | 2 | 700 | 22OCT2020 08:21 | LY3819253 700mg IV           |
| 10201008 | 11850339075 | E1_11850339075_323690w_BE1.fastq.gz   | S816_   | 4.348  | 23.0   | 1943.436053593180  | 6.43 | NAS | 2   | 2 | 700 | 22OCT2020 08:21 | LY3819253 700mg IV           |
| 10251008 | 11820978190 | E5_11820978190_323690w_BE5.fastq.gz   | L226S   | 1.278  | 2425.0 | 2485.12            | 4.62 | NAS | 3.0 | 2 | 700 | 29OCT2020 11:22 | LY3819253 700mg IV           |
| 10251008 | 11820978190 | E5_11820978190_323690w_BE5.fastq.gz   | E484K   | 3.94   | 2513.0 | 2485.12            | 4.62 | NAS | 3.0 | 2 | 700 | 29OCT2020 11:22 | LY3819253 700mg IV           |
| 10251008 | 11820978190 | E5_11820978190_323690w_BE5.fastq.gz   | S494P   | 2.889  | 2458.0 | 2485.12            | 4.62 | NAS | 3.0 | 2 | 700 | 29OCT2020 11:22 | LY3819253 700mg IV           |
| 10251008 | 11820978190 | E5_11820978190_323690w_BE5.fastq.gz   | S686G   | 1.213  | 1896.0 | 2485.12            | 4.62 | NAS | 3.0 | 2 | 700 | 29OCT2020 11:22 | LY3819253 700mg IV           |
| 10251008 | 11820978190 | E5_11820978190_323690w_BE5.fastq.gz   | A783V   | 1.13   | 1062.0 | 2485.12            | 4.62 | NAS | 3.0 | 2 | 700 | 29OCT2020 11:22 | LY3819253 700mg IV           |
| 10251008 | 11820978190 | E5_11820978190_323690w_BE5.fastq.gz   | K814N   | 14.286 | 7.0    | 2485.12            | 4.62 | NAS | 3.0 | 2 | 700 | 29OCT2020 11:22 | LY3819253 700mg IV           |
| 10241004 | 11800010244 | A1_11800010244_323690w_BA1.fastq.gz   | S316F   | 11.433 | 2624.0 | 2599.046568627450  | 3.17 | NPH | 3.0 | 2 | 700 | 23OCT2020 12:58 | Placebo for LY3819253 700 mg |
| 10241004 | 11800010244 | A1_11800010244_323690w_BA1.fastq.gz   | A435T   | 1.028  | 2725.0 | 2599.046568627450  | 3.17 | NPH | 3.0 | 2 | 700 | 23OCT2020 12:58 | Placebo for LY3819253 700 mg |
| 10241004 | 11800010244 | A1_11800010244_323690w_BA1.fastq.gz   | T747I   | 12.171 | 912.0  | 2599.046568627450  | 3.17 | NPH | 3.0 | 2 | 700 | 23OCT2020 12:58 | Placebo for LY3819253 700 mg |
| 10311014 | 11812604302 | A11_11812604302_323690w_BA11.fastq.gz | F43I    | 1.028  | 3696.0 | 2323.975113122170  | 6.56 | NAS | 3.0 | 2 | 700 | 20NOV2020 09:20 | Placebo for LY3819253 700 mg |
| 10491006 | 11818963392 | A3_11818963392_323690w_BA3.fastq.gz   | T33S    | 2.623  | 5681.0 | 2132.2330917874400 | 3.56 | NPH | 3.0 | 2 | 700 | 13NOV2020 09:40 | LY3819253 700mg IV           |
| 10491006 | 11818963392 | A3_11818963392_323690w_BA3.fastq.gz   | S60F    | 2.816  | 3409.0 | 2132.2330917874400 | 3.56 | NPH | 3.0 | 2 | 700 | 13NOV2020 09:40 | LY3819253 700mg IV           |
| 10491006 | 11818963392 | A3_11818963392_323690w_BA3.fastq.gz   | Q134_   | 3.226  | 1953.0 | 2132.2330917874400 | 3.56 | NPH | 3.0 | 2 | 700 | 13NOV2020 09:40 | LY3819253 700mg IV           |
| 10491006 | 11818963392 | A3_11818963392_323690w_BA3.fastq.gz   | E156D   | 3.231  | 2043.0 | 2132.2330917874400 | 3.56 | NPH | 3.0 | 2 | 700 | 13NOV2020 09:40 | LY3819253 700mg IV           |
| 10491006 | 11818963392 | A3_11818963392_323690w_BA3.fastq.gz   | E281K   | 3.775  | 2066.0 | 2132.2330917874400 | 3.56 | NPH | 3.0 | 2 | 700 | 13NOV2020 09:40 | LY3819253 700mg IV           |
| 10491006 | 11818963392 | A3_11818963392_323690w_BA3.fastq.gz   | S297L   | 3.039  | 2172.0 | 2132.2330917874400 | 3.56 | NPH | 3.0 | 2 | 700 | 13NOV2020 09:40 | LY3819253 700mg IV           |
| 10491006 | 11818963392 | A3_11818963392_323690w_BA3.fastq.gz   | D364E   | 3.284  | 2223.0 | 2132.2330917874400 | 3.56 | NPH | 3.0 | 2 | 700 | 13NOV2020 09:40 | LY3819253 700mg IV           |
| 10491006 | 11818963392 | A3_11818963392_323690w_BA3.fastq.gz   | Q607_   | 3.583  | 1814.0 | 2132.2330917874400 | 3.56 | NPH | 3.0 | 2 | 700 | 13NOV2020 09:40 | LY3819253 700mg IV           |
| 10491006 | 11818963392 | A3_11818963392_323690w_BA3.fastq.gz   | A672V   | 2.004  | 1447.0 | 2132.2330917874400 | 3.56 | NPH | 3.0 | 2 | 700 | 13NOV2020 09:40 | LY3819253 700mg IV           |
| 10491006 | 11818963392 | A3_11818963392_323690w_BA3.fastq.gz   | Q675del | 1.35   | 1333.0 | 2132.2330917874400 | 3.56 | NPH | 3.0 | 2 | 700 | 13NOV2020 09:40 | LY3819253 700mg IV           |
| 10491006 | 11818963392 | A3_11818963392_323690w_BA3.fastq.gz   | T676del | 1.307  | 1377.0 | 2132.2330917874400 | 3.56 | NPH | 3.0 | 2 | 700 | 13NOV2020 09:40 | LY3819253 700mg IV           |
| 10491006 | 11818963392 | A3_11818963392_323690w_BA3.fastq.gz   | Q677del | 1.279  | 1407.0 | 2132.2330917874400 | 3.56 | NPH | 3.0 | 2 | 700 | 13NOV2020 09:40 | LY3819253 700mg IV           |
| 10491006 | 11818963392 | A3_11818963392_323690w_BA3.fastq.gz   | T678del | 1.28   | 1406.0 | 2132.2330917874400 | 3.56 | NPH | 3.0 | 2 | 700 | 13NOV2020 09:40 | LY3819253 700mg IV           |
| 10491006 | 11818963392 | A3_11818963392_323690w_BA3.fastq.gz   | R683W   | 4.932  | 1399.0 | 2132.2330917874400 | 3.56 | NPH | 3.0 | 2 | 700 | 13NOV2020 09:40 | LY3819253 700mg IV           |
| 10491006 | 11818963392 | A3_11818963392_323690w_BA3.fastq.gz   | F782V   | 1.24   | 726.0  | 2132.2330917874400 | 3.56 | NPH | 3.0 | 2 | 700 | 13NOV2020 09:40 | LY3819253 700mg IV           |
| 10011025 | 11818961610 | A6_11818961610_323690w_BA6.fastq.gz   | L5F     | 1.313  | 5941.0 | 2180.603117506000  | 4.6  | NPH | 3.0 | 2 | 700 | 19NOV2020 08:10 | Placebo for LY3819253 700 mg |
| 10011025 | 11818961610 | A6_11818961610_323690w_BA6.fastq.gz   | H49Y    | 1.05   | 4094.0 | 2180.603117506000  | 4.6  | NPH | 3.0 | 2 | 700 | 19NOV2020 08:10 | Placebo for LY3819253 700 mg |
| 10011025 | 11818961610 | A6_11818961610_323690w_BA6.fastq.gz   | N87Y    | 1.073  | 2144.0 | 2180.603117506000  | 4.6  | NPH | 3.0 | 2 | 700 | 19NOV2020 08:10 | Placebo for LY3819253 700 mg |
| 10011025 | 11818961610 | A6_11818961610_323690w_BA6.fastq.gz   | S112L   | 1.355  | 1993.0 | 2180.603117506000  | 4.6  | NPH | 3.0 | 2 | 700 | 19NOV2020 08:10 | Placebo for LY3819253 700 mg |
| 10011025 | 11818961610 | A6_11818961610_323690w_BA6.fastq.gz   | L216F   | 1.05   | 2095.0 | 2180.603117506000  | 4.6  | NPH | 3.0 | 2 | 700 | 19NOV2020 08:10 | Placebo for LY3819253 700 mg |
| 10011025 | 11818961610 | A6_11818961610_323690w_BA6.fastq.gz   | Q218_   | 1.238  | 2101.0 | 2180.603117506000  | 4.6  | NPH | 3.0 | 2 | 700 | 19NOV2020 08:10 | Placebo for LY3819253 700 mg |
| 10011025 | 11818961610 | A6_11818961610_323690w_BA6.fastq.gz   | D389Y   | 1.609  | 2300.0 | 2180.603117506000  | 4.6  | NPH | 3.0 | 2 | 700 | 19NOV2020 08:10 | Placebo for LY3819253 700 mg |
| 10011025 | 11818961610 | A6_11818961610_323690w_BA6.fastq.gz   | P426S   | 1.001  | 2297.0 | 2180.603117506000  | 4.6  | NPH | 3.0 | 2 | 700 | 19NOV2020 08:10 | Placebo for LY3819253 700 mg |
| 10011025 | 11818961610 | A6_11818961610_323690w_BA6.fastq.gz   | F490L   | 1.56   | 2243.0 | 2180.603117506000  | 4.6  | NPH | 3.0 | 2 | 700 | 19NOV2020 08:10 | Placebo for LY3819253 700 mg |
| 10011025 | 11818961610 | A6_11818961610_323690w_BA6.fastq.gz   | G502V   | 1.035  | 2223.0 | 2180.603117506000  | 4.6  | NPH | 3.0 | 2 | 700 | 19NOV2020 08:10 | Placebo for LY3819253 700 mg |
| 10011025 | 11818961610 | A6_11818961610_323690w_BA6.fastq.gz   | G526_   | 1.203  | 2078.0 | 2180.603117506000  | 4.6  | NPH | 3.0 | 2 | 700 | 19NOV2020 08:10 | Placebo for LY3819253 700 mg |
| 10011025 | 11818961610 | A6_11818961610_323690w_BA6.fastq.gz   | S591F   | 1.262  | 1902.0 | 2180.603117506000  | 4.6  | NPH | 3.0 | 2 | 700 | 19NOV2020 08:10 | Placebo for LY3819253 700 mg |
| 10011025 | 11818961610 | A6_11818961610_323690w_BA6.fastq.gz   | S596I   | 1.012  | 1877.0 | 2180.603117506000  | 4.6  | NPH | 3.0 | 2 | 700 | 19NOV2020 08:10 | Placebo for LY3819253 700 mg |
| 10011025 | 11818961610 | A6_11818961610_323690w_BA6.fastq.gz   | A688V   | 1.062  | 1507.0 | 2180.603117506000  | 4.6  | NPH | 3.0 | 2 | 700 | 19NOV2020 08:10 | Placebo for LY3819253 700 mg |
| 10011025 | 11818961610 | A6_11818961610_323690w_BA6.fastq.gz   | C760R   | 1.006  | 696.0  | 2180.603117506000  | 4.6  | NPH | 3.0 | 2 | 700 | 19NOV2020 08:10 | Placebo for LY3819253 700 mg |
| 10051009 | 11835657548 | B12_11835657548_323692w_NB12.fastq.gz | L18F    | 11.571 | 9783.0 | 3729.8746928746900 | 2.46 | NAS | 3.0 | 2 | 700 | 16NOV2020 13:50 | LY3819253 700mg IV           |
| 10121010 | 11804196416 | 26_11804196416_323231w_NC2.fastq.gz   | T761I   | 1.299  | 154.0  | 844.563882063882   | 4.63 | NPH | 3.0 | 2 | 700 | 12NOV2020 12:43 | Placebo for LY3819253 700 mg |
| 10121010 | 11804196416 | 26_11804196416_323231w_NC2.fastq.gz   | Q762_   | 1.361  | 147.0  | 844.563882063882   | 4.63 | NPH | 3.0 | 2 | 700 | 12NOV2020 12:43 | Placebo for LY3819253 700 mg |
| 10311008 | 11839924483 | 7_11839924483_323231w_NA7.fastq.gz    | V3F     | 3.639  | 4122.0 | 1758.4452466907300 | 2.89 | NPH | 3.0 | 2 | 700 | 02NOV2020 12:19 | Placebo for LY3819253 700 mg |
| 10311008 | 11839924483 | 7_11839924483_323231w_NA7.fastq.gz    | L18P    | 1.269  | 5438.0 | 1758.4452466907300 | 2.89 | NPH | 3.0 | 2 | 700 | 02NOV2020 12:19 | Placebo for LY3819253 700 mg |
| 10311008 | 11839924483 | 7_11839924483_323231w_NA7.fastq.gz    | F59L    | 4.304  | 3973.0 | 1758.4452466907300 | 2.89 | NPH | 3.0 | 2 | 700 | 02NOV2020 12:19 | Placebo for LY3819253 700 mg |
| 10311008 | 11839924483 | 7_11839924483_323231w_NA7.fastq.gz    | S60F    | 3.846  | 3952.0 | 1758.4452466907300 | 2.89 | NPH | 3.0 | 2 | 700 | 02NOV2020 12:19 | Placebo for LY3819253 700 mg |
| 10311008 | 11839924483 | 7_11839924483_323231w_NA7.fastq.gz    | Y248_   | 3.543  | 1524.0 | 1758.4452466907300 | 2.89 | NPH | 3.0 | 2 | 700 | 02NOV2020 12:19 | Placebo for LY3819253 700 mg |
| 10311008 | 11839924483 | 7_11839924483_323231w_NA7.fastq.gz    | P272L   | 3.734  | 1607.0 | 1758.4452466907300 |      |     |     |   |     |                 |                              |

|          |             |                                      |         |        |        |                    |      |     |     |   |     |                 |                              |
|----------|-------------|--------------------------------------|---------|--------|--------|--------------------|------|-----|-----|---|-----|-----------------|------------------------------|
| 10131011 | 11810487240 | 63_11810487240_323231w_NF3.fastq.gz  | P337R   | 1.045  | 1913.0 | 1976.8784933171300 | 3.8  | NAS | 3.0 | 2 | 700 | 12NOV2020 13:42 | Placebo for LY3819253 700 mg |
| 10141005 | 11806308676 | 70_11806308676_323231w_NF10.fastq.gz | S297L   | 1.515  | 1914.0 | 2099.6743902439000 | 3.64 | NPH | 3.0 | 2 | 700 | 09NOV2020 09:12 | Placebo for LY3819253 700 mg |
| 10141005 | 11806308676 | 70_11806308676_323231w_NF10.fastq.gz | I770R   | 1.022  | 3426.0 | 2099.6743902439000 | 3.64 | NPH | 3.0 | 2 | 700 | 09NOV2020 09:12 | Placebo for LY3819253 700 mg |
| 10031026 | 11852515277 | 28_11852515277_323231w_NC4.fastq.gz  | Y266_   | 17.333 | 1050.0 | 1228.5852760736200 | 2.47 | NPH | 3.0 | 2 | 700 | 16NOV2020 -2:-2 | LY3819253 700mg IV           |
| 10031026 | 11852515277 | 28_11852515277_323231w_NC4.fastq.gz  | D290V   | 15.997 | 1144.0 | 1228.5852760736200 | 2.47 | NPH | 3.0 | 2 | 700 | 16NOV2020 -2:-2 | LY3819253 700mg IV           |
| 10131007 | 11820985152 | 57_11820985152_323231w_NE9.fastq.gz  | C15F    | 13.692 | 6230.0 | 1990.640870616690  | 4.18 | NPH | 3.0 | 2 | 700 | 26OCT2020 09:56 | Placebo for LY3819253 700 mg |
| 10131007 | 11820985152 | 57_11820985152_323231w_NE9.fastq.gz  | Q23_    | 3.471  | 6539.0 | 1990.640870616690  | 4.18 | NPH | 3.0 | 2 | 700 | 26OCT2020 09:56 | Placebo for LY3819253 700 mg |
| 10131007 | 11820985152 | 57_11820985152_323231w_NE9.fastq.gz  | P25H    | 2.134  | 6515.0 | 1990.640870616690  | 4.18 | NPH | 3.0 | 2 | 700 | 26OCT2020 09:56 | Placebo for LY3819253 700 mg |
| 10131007 | 11820985152 | 57_11820985152_323231w_NE9.fastq.gz  | H49Y    | 2.983  | 5498.0 | 1990.640870616690  | 4.18 | NPH | 3.0 | 2 | 700 | 26OCT2020 09:56 | Placebo for LY3819253 700 mg |
| 10131007 | 11820985152 | 57_11820985152_323231w_NE9.fastq.gz  | A67T    | 3.149  | 4192.0 | 1990.640870616690  | 4.18 | NPH | 3.0 | 2 | 700 | 26OCT2020 09:56 | Placebo for LY3819253 700 mg |
| 10131007 | 11820985152 | 57_11820985152_323231w_NE9.fastq.gz  | T109del | 1.236  | 2831.0 | 1990.640870616690  | 4.18 | NPH | 3.0 | 2 | 700 | 26OCT2020 09:56 | Placebo for LY3819253 700 mg |
| 10131007 | 11820985152 | 57_11820985152_323231w_NE9.fastq.gz  | V143del | 1.146  | 1658.0 | 1990.640870616690  | 4.18 | NPH | 3.0 | 2 | 700 | 26OCT2020 09:56 | Placebo for LY3819253 700 mg |
| 10131007 | 11820985152 | 57_11820985152_323231w_NE9.fastq.gz  | Y145H   | 15.092 | 1736.0 | 1990.640870616690  | 4.18 | NPH | 3.0 | 2 | 700 | 26OCT2020 09:56 | Placebo for LY3819253 700 mg |
| 10131007 | 11820985152 | 57_11820985152_323231w_NE9.fastq.gz  | W258L   | 2.45   | 1796.0 | 1990.640870616690  | 4.18 | NPH | 3.0 | 2 | 700 | 26OCT2020 09:56 | Placebo for LY3819253 700 mg |
| 10131007 | 11820985152 | 57_11820985152_323231w_NE9.fastq.gz  | C538F   | 3.025  | 1686.0 | 1990.640870616690  | 4.18 | NPH | 3.0 | 2 | 700 | 26OCT2020 09:56 | Placebo for LY3819253 700 mg |
| 10131007 | 11820985152 | 57_11820985152_323231w_NE9.fastq.gz  | L611P   | 2.965  | 1349.0 | 1990.640870616690  | 4.18 | NPH | 3.0 | 2 | 700 | 26OCT2020 09:56 | Placebo for LY3819253 700 mg |
| 10131007 | 11820985152 | 57_11820985152_323231w_NE9.fastq.gz  | E702K   | 3.386  | 886.0  | 1990.640870616690  | 4.18 | NPH | 3.0 | 2 | 700 | 26OCT2020 09:56 | Placebo for LY3819253 700 mg |
| 10131007 | 11820985152 | 57_11820985152_323231w_NE9.fastq.gz  | G757C   | 2.672  | 262.0  | 1990.640870616690  | 4.18 | NPH | 3.0 | 2 | 700 | 26OCT2020 09:56 | Placebo for LY3819253 700 mg |
| 10131007 | 11820985152 | 57_11820985152_323231w_NE9.fastq.gz  | T761I   | 2.304  | 217.0  | 1990.640870616690  | 4.18 | NPH | 3.0 | 2 | 700 | 26OCT2020 09:56 | Placebo for LY3819253 700 mg |
| 10171006 | 11833639427 | 78_11833639427_323231w_NG6.fastq.gz  | T240N   | 1.821  | 1263.0 | 1637.5870889159600 | 3.24 | NPH | 3.0 | 2 | 700 | 13NOV2020 10:22 | Placebo for LY3819253 700 mg |
| 10171006 | 11833639427 | 78_11833639427_323231w_NG6.fastq.gz  | P330L   | 1.717  | 1281.0 | 1637.5870889159600 | 3.24 | NPH | 3.0 | 2 | 700 | 13NOV2020 10:22 | Placebo for LY3819253 700 mg |
| 10171006 | 11833639427 | 78_11833639427_323231w_NG6.fastq.gz  | S349F   | 1.637  | 1283.0 | 1637.5870889159600 | 3.24 | NPH | 3.0 | 2 | 700 | 13NOV2020 10:22 | Placebo for LY3819253 700 mg |
| 10171006 | 11833639427 | 78_11833639427_323231w_NG6.fastq.gz  | R357_   | 1.167  | 1285.0 | 1637.5870889159600 | 3.24 | NPH | 3.0 | 2 | 700 | 13NOV2020 10:22 | Placebo for LY3819253 700 mg |
| 10171006 | 11833639427 | 78_11833639427_323231w_NG6.fastq.gz  | G413E   | 2.072  | 1303.0 | 1637.5870889159600 | 3.24 | NPH | 3.0 | 2 | 700 | 13NOV2020 10:22 | Placebo for LY3819253 700 mg |
| 10171006 | 11833639427 | 78_11833639427_323231w_NG6.fastq.gz  | Y453F   | 1.15   | 1391.0 | 1637.5870889159600 | 3.24 | NPH | 3.0 | 2 | 700 | 13NOV2020 10:22 | Placebo for LY3819253 700 mg |
| 10171006 | 11833639427 | 78_11833639427_323231w_NG6.fastq.gz  | Q498_   | 2.071  | 1304.0 | 1637.5870889159600 | 3.24 | NPH | 3.0 | 2 | 700 | 13NOV2020 10:22 | Placebo for LY3819253 700 mg |
| 10171006 | 11833639427 | 78_11833639427_323231w_NG6.fastq.gz  | R685S   | 1.603  | 1185.0 | 1637.5870889159600 | 3.24 | NPH | 3.0 | 2 | 700 | 13NOV2020 10:22 | Placebo for LY3819253 700 mg |
| 10171006 | 11833639427 | 78_11833639427_323231w_NG6.fastq.gz  | Q779_   | 1.349  | 593.0  | 1637.5870889159600 | 3.24 | NPH | 3.0 | 2 | 700 | 13NOV2020 10:22 | Placebo for LY3819253 700 mg |
| 10131009 | 11820985153 | 50_11820985153_323231w_NE2.fastq.gz  | S746_   | 1.486  | 1077.0 | 3464.1819291819300 | 5.3  | NPH | 3.0 | 2 | 700 | 06NOV2020 11:34 | LY3819253 700mg IV           |
| 10131006 | 11835675968 | 59_11835675968_323231w_NE11.fastq.gz | P9S     | 1.841  | 7333.0 | 3080.275485436890  | 2.3  | NPH | 3.0 | 2 | 700 | 21OCT2020 09:19 | Placebo for LY3819253 700 mg |
| 10131006 | 11835675968 | 59_11835675968_323231w_NE11.fastq.gz | A222V   | 2.823  | 2692.0 | 3080.275485436890  | 2.3  | NPH | 3.0 | 2 | 700 | 21OCT2020 09:19 | Placebo for LY3819253 700 mg |
| 10131006 | 11835675968 | 59_11835675968_323231w_NE11.fastq.gz | F306L   | 2.92   | 2808.0 | 3080.275485436890  | 2.3  | NPH | 3.0 | 2 | 700 | 21OCT2020 09:19 | Placebo for LY3819253 700 mg |
| 10131006 | 11835675968 | 59_11835675968_323231w_NE11.fastq.gz | C336F   | 2.542  | 2793.0 | 3080.275485436890  | 2.3  | NPH | 3.0 | 2 | 700 | 21OCT2020 09:19 | Placebo for LY3819253 700 mg |
| 10131006 | 11835675968 | 59_11835675968_323231w_NE11.fastq.gz | P579L   | 2.476  | 2666.0 | 3080.275485436890  | 2.3  | NPH | 3.0 | 2 | 700 | 21OCT2020 09:19 | Placebo for LY3819253 700 mg |
| 10131006 | 11835675968 | 59_11835675968_323231w_NE11.fastq.gz | Q675_   | 2.414  | 2361.0 | 3080.275485436890  | 2.3  | NPH | 3.0 | 2 | 700 | 21OCT2020 09:19 | Placebo for LY3819253 700 mg |
| 10201021 | 11837771593 | 38_11837771593_323231w_ND2.fastq.gz  | G142C   | 7.437  | 1143.0 | 1285.0024390243900 | 3.28 | NPH | 3.0 | 2 | 700 | 17NOV2020 09:05 | Placebo for LY3819253 700 mg |
| 10201021 | 11837771593 | 38_11837771593_323231w_ND2.fastq.gz  | S162R   | 7.259  | 1171.0 | 1285.0024390243900 | 3.28 | NPH | 3.0 | 2 | 700 | 17NOV2020 09:05 | Placebo for LY3819253 700 mg |
| 10201021 | 11837771593 | 38_11837771593_323231w_ND2.fastq.gz  | L270F   | 6.452  | 1178.0 | 1285.0024390243900 | 3.28 | NPH | 3.0 | 2 | 700 | 17NOV2020 09:05 | Placebo for LY3819253 700 mg |
| 10201021 | 11837771593 | 38_11837771593_323231w_ND2.fastq.gz  | T385I   | 7.437  | 1264.0 | 1285.0024390243900 | 3.28 | NPH | 3.0 | 2 | 700 | 17NOV2020 09:05 | Placebo for LY3819253 700 mg |
| 10201021 | 11837771593 | 38_11837771593_323231w_ND2.fastq.gz  | D389G   | 7.222  | 1260.0 | 1285.0024390243900 | 3.28 | NPH | 3.0 | 2 | 700 | 17NOV2020 09:05 | Placebo for LY3819253 700 mg |
| 10201021 | 11837771593 | 38_11837771593_323231w_ND2.fastq.gz  | T470S   | 4.88   | 1291.0 | 1285.0024390243900 | 3.28 | NPH | 3.0 | 2 | 700 | 17NOV2020 09:05 | Placebo for LY3819253 700 mg |
| 10201021 | 11837771593 | 38_11837771593_323231w_ND2.fastq.gz  | Q474R   | 3.855  | 1271.0 | 1285.0024390243900 | 3.28 | NPH | 3.0 | 2 | 700 | 17NOV2020 09:05 | Placebo for LY3819253 700 mg |
| 10241005 | 11837828419 | 72_11837828419_323231w_NF12.fastq.gz | P57S    | 11.111 | 9.0    | 595.1779411764710  | 4.84 | NPH | 3.0 | 2 | 700 | 16NOV2020 09:15 | Placebo for LY3819253 700 mg |
| 10241005 | 11837828419 | 72_11837828419_323231w_NF12.fastq.gz | N99H    | 16.667 | 6.0    | 595.1779411764710  | 4.84 | NPH | 3.0 | 2 | 700 | 16NOV2020 09:15 | Placebo for LY3819253 700 mg |
| 10241005 | 11837828419 | 72_11837828419_323231w_NF12.fastq.gz | V159F   | 20.0   | 5.0    | 595.1779411764710  | 4.84 | NPH | 3.0 | 2 | 700 | 16NOV2020 09:15 | Placebo for LY3819253 700 mg |
| 10131010 | 11810489794 | 53_11810489794_323231w_NE5.fastq.gz  | F59L    | 1.077  | 3251.0 | 1137.360824742270  | 6.82 | NPH | 3.0 | 2 | 700 | 12NOV2020 12:52 | Placebo for LY3819253 700 mg |
| 10131010 | 11810489794 | 53_11810489794_323231w_NE5.fastq.gz  | T63I    | 6.982  | 2392.0 | 1137.360824742270  | 6.82 | NPH | 3.0 | 2 | 700 | 12NOV2020 12:52 | Placebo for LY3819253 700 mg |
| 10131010 | 11810489794 | 53_11810489794_323231w_NE5.fastq.gz  | P174T   | 1.19   | 84.0   | 1137.360824742270  | 6.82 | NPH | 3.0 | 2 | 700 | 12NOV2020 12:52 | Placebo for LY3819253 700 mg |
| 10131010 | 11810489794 | 53_11810489794_323231w_NE5.fastq.gz  | E191D   | 2.326  | 43.0   | 1137.360824742270  | 6.82 | NPH | 3.0 | 2 | 700 | 12NOV2020 12:52 | Placebo for LY3819253 700 mg |
| 10131010 | 11810489794 | 53_11810489794_323231w_NE5.fastq.gz  | P230L   | 2.273  | 44.0   | 1137.360824742270  | 6.82 | NPH | 3.0 | 2 | 700 | 12NOV2020 12:52 | Placebo for LY3819253 700 mg |
| 10131010 | 11810489794 | 53_11810489794_323231w_NE5.fastq.gz  | Y248C   | 2.128  | 47.0   | 1137.360824742270  | 6.82 | NPH | 3.0 | 2 | 700 | 12NOV2020 12:52 | Placebo for LY3819253 700 mg |
| 10131010 | 11810489794 | 53_11810489794_323231w_NE5.fastq.gz  | T259A   | 2.128  | 47.0   | 1137.360824742270  | 6.82 | NPH | 3.0 | 2 | 700 | 12NOV2020 12:52 | Placebo for LY3819253 700 mg |
| 10131010 | 11810489794 | 53_11810489794_323231w_NE5.fastq.gz  | Y269F   | 2.174  | 46.0   | 1137.360824742270  | 6.82 | NPH | 3.0 | 2 | 700 | 12NOV2020 12:52 | Placebo for LY3819253 700 mg |
| 10131010 | 11810489794 | 53_11810489794_323231w_NE5.fastq.gz  | Y269H   | 2.174  | 46.0   | 1137.360824742270  | 6.82 | NPH | 3.0 | 2 | 700 | 12NOV2020 12:52 | Placebo for LY3819253 700 mg |
| 10131010 | 11810489794 | 53_11810489794_323231w_NE5.fastq.gz  | F275I   | 2.273  | 44.0   | 1137.360824742270  | 6.82 | NPH | 3.0 | 2 | 700 | 12NOV2020 12:52 | Placebo for LY3819253 700 mg |
| 10131010 | 11810489794 | 53_11810489794_323231w_NE5.fastq.gz  | K278_   | 2.326  | 43.0   | 1137.360824742270  | 6.82 | NPH | 3.0 | 2 | 700 | 12NOV2020 12:52 | Placebo for LY3819253 700 mg |
| 10131010 | 11810489794 | 53_11810489794_323231w_NE5.fastq.gz  | E281K   | 2.5    | 40.0   | 1137.360824742270  | 6.82 | NPH | 3.0 | 2 | 700 | 12NOV2020 12:52 | Placebo for LY3819253 700 mg |
| 10131010 | 11810489794 | 53_11810489794_323231w_NE5.fastq.gz  | S297T   | 3.125  | 32.0   | 1137.360824742270  | 6.82 | NPH | 3.0 | 2 | 700 | 12NOV2020 12:52 | Placebo for LY3819253 700 mg |
| 10131010 | 11810489794 | 53_11810489794_323231w_NE5.fastq.gz  | F318S   | 3.571  | 28.0   | 1137.360824742270  | 6.82 | NPH | 3.0 | 2 | 700 | 12NOV2020 12:52 | Placebo for LY3819253 700 mg |
| 10131010 | 11810489794 | 53_11810489794_323231w_NE5.fastq.gz  | C336R   | 3.125  | 32.0   | 1137.360824742270  | 6.82 | NPH | 3.0 | 2 | 700 | 12NOV2020 12:52 | Placebo for LY3819253 700 mg |
| 10131010 | 11810489794 | 53_11810489794_323231w_NE5.fastq.gz  | I418L   | 4.762  | 21.0   | 1137.360824742270  | 6.82 | NPH | 3.0 | 2 | 700 | 12NOV2020 12:52 | Placebo for LY3819253 700 mg |
| 10131010 | 11810489794 | 53_11810489794_323231w_NE5.fastq.gz  | Y421S   | 4.545  | 22.0   | 1137.360824742270  | 6.82 | NPH | 3.0 | 2 | 700 | 12NOV2020 12:52 | Placebo for LY3819253 700 mg |
| 10131010 | 11810489794 | 53_11810489794_323231w_NE5.fastq.gz  | P426L   | 4.167  | 24.0   | 1137.360824742270  | 6.82 | NPH | 3.0 | 2 | 700 | 12NOV2020 12:52 | Placebo for LY3819253 700 mg |
| 10131010 | 11810489794 | 53_11810489794_323231w_NE5.fastq.gz  | F429del | 4.348  | 23.0   | 1137.360824742270  | 6.82 | NPH | 3.0 | 2 |     |                 |                              |

|          |             |                                       |         |        |        |                    |      |     |     |   |     |                 |                              |
|----------|-------------|---------------------------------------|---------|--------|--------|--------------------|------|-----|-----|---|-----|-----------------|------------------------------|
| 10161007 | 11814750218 | 68_11814750218_323231w_NF8.fastq.gz   | F490S   | 1.305  | 1839.0 | 1821.2137592137600 | 3.55 | NPH | 3.0 | 2 | 700 | 13NOV2020 09:33 | LY3819253 700mg IV           |
| 10161007 | 11814750218 | 68_11814750218_323231w_NF8.fastq.gz   | I794V   | 1.357  | 516.0  | 1821.2137592137600 | 3.55 | NPH | 3.0 | 2 | 700 | 13NOV2020 09:33 | LY3819253 700mg IV           |
| 10081009 | 11837815880 | 47_11837815880_323231w_ND11.fastq.gz  | G75V    | 1.102  | 4084.0 | 3040.006097560980  | 3.81 | NPH | 3.0 | 2 | 700 | 16NOV2020 11:47 | LY3819253 700mg IV           |
| 10081009 | 11837815880 | 47_11837815880_323231w_ND11.fastq.gz  | T76I    | 1.011  | 4054.0 | 3040.006097560980  | 3.81 | NPH | 3.0 | 2 | 700 | 16NOV2020 11:47 | LY3819253 700mg IV           |
| 10081007 | 11837817922 | 48_11837817922_323231w_ND12.fastq.gz  | S31F    | 15.438 | 5778.0 | 2897.205882352940  | 2.73 | NPH | 3.0 | 2 | 700 | 13NOV2020 09:56 | Placebo for LY3819253 700 mg |
| 10081007 | 11837817922 | 48_11837817922_323231w_ND12.fastq.gz  | T76S    | 13.52  | 3247.0 | 2897.205882352940  | 2.73 | NPH | 3.0 | 2 | 700 | 13NOV2020 09:56 | Placebo for LY3819253 700 mg |
| 10201020 | 11820979402 | 42_11820979402_323231w_ND6.fastq.gz   | A27P    | 1.074  | 9313.0 | 3097.8140947752100 | 4.08 | NPH | 3.0 | 2 | 700 | 12NOV2020 10:19 | Placebo for LY3819253 700 mg |
| 10201020 | 11820979402 | 42_11820979402_323231w_ND6.fastq.gz   | G199R   | 1.101  | 2906.0 | 3097.8140947752100 | 4.08 | NPH | 3.0 | 2 | 700 | 12NOV2020 10:19 | Placebo for LY3819253 700 mg |
| 10201020 | 11820979402 | 42_11820979402_323231w_ND6.fastq.gz   | G431C   | 1.173  | 3070.0 | 3097.8140947752100 | 4.08 | NPH | 3.0 | 2 | 700 | 12NOV2020 10:19 | Placebo for LY3819253 700 mg |
| 10201020 | 11820979402 | 42_11820979402_323231w_ND6.fastq.gz   | V705L   | 1.381  | 1955.0 | 3097.8140947752100 | 4.08 | NPH | 3.0 | 2 | 700 | 12NOV2020 10:19 | Placebo for LY3819253 700 mg |
| 10201020 | 11820979402 | 42_11820979402_323231w_ND6.fastq.gz   | T761S   | 1.019  | 589.0  | 3097.8140947752100 | 4.08 | NPH | 3.0 | 2 | 700 | 12NOV2020 10:19 | Placebo for LY3819253 700 mg |
| 10181010 | 11802179982 | 12_11802179982_323523w_AF10.fastq.gz  | E96_    | 3.325  | 2015.0 | 2061.6585662211400 | 3.16 | NPH | 3.0 | 2 | 700 | 13NOV2020 08:53 | LY3819253 700mg IV           |
| 10181010 | 11802179982 | 12_11802179982_323523w_AF10.fastq.gz  | L441F   | 4.502  | 1999.0 | 2061.6585662211400 | 3.16 | NPH | 3.0 | 2 | 700 | 13NOV2020 08:53 | LY3819253 700mg IV           |
| 10181010 | 11802179982 | 12_11802179982_323523w_AF10.fastq.gz  | P463S   | 4.675  | 2075.0 | 2061.6585662211400 | 3.16 | NPH | 3.0 | 2 | 700 | 13NOV2020 08:53 | LY3819253 700mg IV           |
| 10181010 | 11802179982 | 12_11802179982_323523w_AF10.fastq.gz  | G485C   | 3.454  | 1969.0 | 2061.6585662211400 | 3.16 | NPH | 3.0 | 2 | 700 | 13NOV2020 08:53 | LY3819253 700mg IV           |
| 10181010 | 11802179982 | 12_11802179982_323523w_AF10.fastq.gz  | A694S   | 1.554  | 1223.0 | 2061.6585662211400 | 3.16 | NPH | 3.0 | 2 | 700 | 13NOV2020 08:53 | LY3819253 700mg IV           |
| 10181009 | 11856693711 | 14_11856693711_323523w_AF12.fastq.gz  | S46P    | 4.847  | 5550.0 | 2665.548619447780  | 3.47 | NPH | 3.0 | 2 | 700 | 09NOV2020 08:40 | LY3819253 700mg IV           |
| 10181009 | 11856693711 | 14_11856693711_323523w_AF12.fastq.gz  | E471K   | 3.43   | 2507.0 | 2665.548619447780  | 3.47 | NPH | 3.0 | 2 | 700 | 09NOV2020 08:40 | LY3819253 700mg IV           |
| 10181009 | 11856693711 | 14_11856693711_323523w_AF12.fastq.gz  | T553N   | 4.316  | 2456.0 | 2665.548619447780  | 3.47 | NPH | 3.0 | 2 | 700 | 09NOV2020 08:40 | LY3819253 700mg IV           |
| 10181009 | 11856693711 | 14_11856693711_323523w_AF12.fastq.gz  | P600L   | 8.361  | 2117.0 | 2665.548619447780  | 3.47 | NPH | 3.0 | 2 | 700 | 09NOV2020 08:40 | LY3819253 700mg IV           |
| 10181009 | 11856693711 | 14_11856693711_323523w_AF12.fastq.gz  | S637F   | 4.691  | 2281.0 | 2665.548619447780  | 3.47 | NPH | 3.0 | 2 | 700 | 09NOV2020 08:40 | LY3819253 700mg IV           |
| 10181009 | 11856693711 | 14_11856693711_323523w_AF12.fastq.gz  | P665del | 1.151  | 1737.0 | 2665.548619447780  | 3.47 | NPH | 3.0 | 2 | 700 | 09NOV2020 08:40 | LY3819253 700mg IV           |
| 10181009 | 11856693711 | 14_11856693711_323523w_AF12.fastq.gz  | I666del | 1.141  | 1753.0 | 2665.548619447780  | 3.47 | NPH | 3.0 | 2 | 700 | 09NOV2020 08:40 | LY3819253 700mg IV           |
| 10181009 | 11856693711 | 14_11856693711_323523w_AF12.fastq.gz  | G667del | 1.106  | 1808.0 | 2665.548619447780  | 3.47 | NPH | 3.0 | 2 | 700 | 09NOV2020 08:40 | LY3819253 700mg IV           |
| 10181009 | 11856693711 | 14_11856693711_323523w_AF12.fastq.gz  | A668del | 1.117  | 1791.0 | 2665.548619447780  | 3.47 | NPH | 3.0 | 2 | 700 | 09NOV2020 08:40 | LY3819253 700mg IV           |
| 10181009 | 11856693711 | 14_11856693711_323523w_AF12.fastq.gz  | G669del | 1.119  | 1787.0 | 2665.548619447780  | 3.47 | NPH | 3.0 | 2 | 700 | 09NOV2020 08:40 | LY3819253 700mg IV           |
| 10181009 | 11856693711 | 14_11856693711_323523w_AF12.fastq.gz  | I670del | 1.131  | 1768.0 | 2665.548619447780  | 3.47 | NPH | 3.0 | 2 | 700 | 09NOV2020 08:40 | LY3819253 700mg IV           |
| 10181009 | 11856693711 | 14_11856693711_323523w_AF12.fastq.gz  | C671del | 1.101  | 1817.0 | 2665.548619447780  | 3.47 | NPH | 3.0 | 2 | 700 | 09NOV2020 08:40 | LY3819253 700mg IV           |
| 10181009 | 11856693711 | 14_11856693711_323523w_AF12.fastq.gz  | A672del | 1.101  | 1817.0 | 2665.548619447780  | 3.47 | NPH | 3.0 | 2 | 700 | 09NOV2020 08:40 | LY3819253 700mg IV           |
| 10181009 | 11856693711 | 14_11856693711_323523w_AF12.fastq.gz  | S673del | 1.085  | 1843.0 | 2665.548619447780  | 3.47 | NPH | 3.0 | 2 | 700 | 09NOV2020 08:40 | LY3819253 700mg IV           |
| 10171002 | 11833572937 | F11_11833572937_324023w_AF11.fastq.gz | I434del | 3.255  | 6943.0 | 2367.5400943396200 | 4.5  | NPH | 3.0 | 2 | 700 | 16OCT2020 11:17 | Placebo for LY3819253 700 mg |
| 10171002 | 11833572937 | F11_11833572937_324023w_AF11.fastq.gz | A435del | 3.256  | 6942.0 | 2367.5400943396200 | 4.5  | NPH | 3.0 | 2 | 700 | 16OCT2020 11:17 | Placebo for LY3819253 700 mg |
| 10171002 | 11833572937 | F11_11833572937_324023w_AF11.fastq.gz | W436del | 3.252  | 6950.0 | 2367.5400943396200 | 4.5  | NPH | 3.0 | 2 | 700 | 16OCT2020 11:17 | Placebo for LY3819253 700 mg |
| 10171002 | 11833572937 | F11_11833572937_324023w_AF11.fastq.gz | N437del | 3.272  | 6907.0 | 2367.5400943396200 | 4.5  | NPH | 3.0 | 2 | 700 | 16OCT2020 11:17 | Placebo for LY3819253 700 mg |
| 10171002 | 11833572937 | F11_11833572937_324023w_AF11.fastq.gz | K786R   | 1.494  | 2343.0 | 2367.5400943396200 | 4.5  | NPH | 3.0 | 2 | 700 | 16OCT2020 11:17 | Placebo for LY3819253 700 mg |
| 10171002 | 11833572937 | F11_11833572937_324023w_AF11.fastq.gz | S813R   | 7.692  | 13.0   | 2367.5400943396200 | 4.5  | NPH | 3.0 | 2 | 700 | 16OCT2020 11:17 | Placebo for LY3819253 700 mg |
| 10171002 | 11833572937 | F11_11833572937_324023w_AF11.fastq.gz | G832D   | 20.0   | 5.0    | 2367.5400943396200 | 4.5  | NPH | 3.0 | 2 | 700 | 16OCT2020 11:17 | Placebo for LY3819253 700 mg |
| 10141002 | 11806376973 | G4_11806376973_324023w_AG4.fastq.gz   | S151R   | 1.229  | 407.0  | 790.8243080625750  | 3.3  | NPH | 3.0 | 2 | 700 | 16OCT2020 08:55 | LY3819253 700mg IV           |
| 10141002 | 11806376973 | G4_11806376973_324023w_AG4.fastq.gz   | N282D   | 1.351  | 592.0  | 790.8243080625750  | 3.3  | NPH | 3.0 | 2 | 700 | 16OCT2020 08:55 | LY3819253 700mg IV           |
| 10141002 | 11806376973 | G4_11806376973_324023w_AG4.fastq.gz   | Y453F   | 1.047  | 191.0  | 790.8243080625750  | 3.3  | NPH | 3.0 | 2 | 700 | 16OCT2020 08:55 | LY3819253 700mg IV           |
| 10141002 | 11806376973 | G4_11806376973_324023w_AG4.fastq.gz   | K462N   | 1.102  | 363.0  | 790.8243080625750  | 3.3  | NPH | 3.0 | 2 | 700 | 16OCT2020 08:55 | LY3819253 700mg IV           |
| 10141002 | 11806376973 | G4_11806376973_324023w_AG4.fastq.gz   | L552P   | 1.079  | 834.0  | 790.8243080625750  | 3.3  | NPH | 3.0 | 2 | 700 | 16OCT2020 08:55 | LY3819253 700mg IV           |
| 10141002 | 11806376973 | G4_11806376973_324023w_AG4.fastq.gz   | Q563_   | 1.401  | 714.0  | 790.8243080625750  | 3.3  | NPH | 3.0 | 2 | 700 | 16OCT2020 08:55 | LY3819253 700mg IV           |
| 10141002 | 11806376973 | G4_11806376973_324023w_AG4.fastq.gz   | P631S   | 1.102  | 363.0  | 790.8243080625750  | 3.3  | NPH | 3.0 | 2 | 700 | 16OCT2020 08:55 | LY3819253 700mg IV           |
| 10141002 | 11806376973 | G4_11806376973_324023w_AG4.fastq.gz   | S659P   | 1.676  | 358.0  | 790.8243080625750  | 3.3  | NPH | 3.0 | 2 | 700 | 16OCT2020 08:55 | LY3819253 700mg IV           |
| 10141002 | 11806376973 | G4_11806376973_324023w_AG4.fastq.gz   | Q690P   | 1.33   | 376.0  | 790.8243080625750  | 3.3  | NPH | 3.0 | 2 | 700 | 16OCT2020 08:55 | LY3819253 700mg IV           |
| 10141002 | 11806376973 | G4_11806376973_324023w_AG4.fastq.gz   | V705L   | 1.136  | 352.0  | 790.8243080625750  | 3.3  | NPH | 3.0 | 2 | 700 | 16OCT2020 08:55 | LY3819253 700mg IV           |
| 10141002 | 11806376973 | G4_11806376973_324023w_AG4.fastq.gz   | V781F   | 1.277  | 235.0  | 790.8243080625750  | 3.3  | NPH | 3.0 | 2 | 700 | 16OCT2020 08:55 | LY3819253 700mg IV           |
| 10141002 | 11806376973 | G4_11806376973_324023w_AG4.fastq.gz   | K786R   | 3.642  | 302.0  | 790.8243080625750  | 3.3  | NPH | 3.0 | 2 | 700 | 16OCT2020 08:55 | LY3819253 700mg IV           |
| 10141002 | 11806376973 | G4_11806376973_324023w_AG4.fastq.gz   | F802I   | 1.32   | 303.0  | 790.8243080625750  | 3.3  | NPH | 3.0 | 2 | 700 | 16OCT2020 08:55 | LY3819253 700mg IV           |
| 10141002 | 11806376973 | G4_11806376973_324023w_AG4.fastq.gz   | S803L   | 1.32   | 303.0  | 790.8243080625750  | 3.3  | NPH | 3.0 | 2 | 700 | 16OCT2020 08:55 | LY3819253 700mg IV           |
| 10141002 | 11806376973 | G4_11806376973_324023w_AG4.fastq.gz   | K811N   | 1.365  | 293.0  | 790.8243080625750  | 3.3  | NPH | 3.0 | 2 | 700 | 16OCT2020 08:55 | LY3819253 700mg IV           |
| 10241002 | 11837830473 | F7_11837830473_324023w_AF7.fastq.gz   | S12F    | 10.4   | 4798.0 | 2007.3714981729600 | 3.41 | NPH | 3.0 | 2 | 700 | 16OCT2020 12:23 | Placebo for LY3819253 700 mg |
| 10241002 | 11837830473 | F7_11837830473_324023w_AF7.fastq.gz   | S60F    | 7.398  | 3217.0 | 2007.3714981729600 | 3.41 | NPH | 3.0 | 2 | 700 | 16OCT2020 12:23 | Placebo for LY3819253 700 mg |
| 10241002 | 11837830473 | F7_11837830473_324023w_AF7.fastq.gz   | G261S   | 4.188  | 1146.0 | 2007.3714981729600 | 3.41 | NPH | 3.0 | 2 | 700 | 16OCT2020 12:23 | Placebo for LY3819253 700 mg |
| 10241002 | 11837830473 | F7_11837830473_324023w_AF7.fastq.gz   | Q677_   | 1.258  | 795.0  | 2007.3714981729600 | 3.41 | NPH | 3.0 | 2 | 700 | 16OCT2020 12:23 | Placebo for LY3819253 700 mg |
| 10241002 | 11837830473 | F7_11837830473_324023w_AF7.fastq.gz   | R683L   | 1.533  | 783.0  | 2007.3714981729600 | 3.41 | NPH | 3.0 | 2 | 700 | 16OCT2020 12:23 | Placebo for LY3819253 700 mg |
| 10241002 | 11837830473 | F7_11837830473_324023w_AF7.fastq.gz   | K786R   | 2.215  | 587.0  | 2007.3714981729600 | 3.41 | NPH | 3.0 | 2 | 700 | 16OCT2020 12:23 | Placebo for LY3819253 700 mg |
| 10161004 | 11806298383 | G1_11806298383_324023w_AG1.fastq.gz   | H49Y    | 3.455  | 3126.0 | 1813.6291469194300 | 3.05 | NPH | 3.0 | 2 | 700 | 19OCT2020 12:00 | LY3819253 700mg IV           |
| 10161004 | 11806298383 | G1_11806298383_324023w_AG1.fastq.gz   | P295S   | 3.553  | 1379.0 | 1813.6291469194300 | 3.05 | NPH | 3.0 | 2 | 700 | 19OCT2020 12:00 | LY3819253 700mg IV           |
| 10161004 | 11806298383 | G1_11806298383_324023w_AG1.fastq.gz   | P491L   | 1.908  | 2568.0 | 1813.6291469194300 | 3.05 | NPH | 3.0 | 2 | 700 | 19OCT2020 12:00 | LY3819253 700mg IV           |
| 10161004 | 11806298383 | G1_11806298383_324023w_AG1.fastq.gz   | P507S   | 1.814  | 2591.0 | 1813.6291469194300 | 3.05 | NPH | 3.0 | 2 | 700 | 19OCT2020 12:00 | LY3819253 700mg IV           |
| 10161004 | 11806298383 | G1_11806298383_324023w_AG1.fastq.gz   | V534D   | 1.861  | 2149.0 | 1813.6291469194300 | 3.05 | NPH | 3.0 | 2 | 700 | 19OCT2020 12:00 | LY3819253 700mg IV           |
| 10161004 | 11806298383 | G1_11806298383_324023w_AG1.fastq.gz   | T630I   | 2.316  | 993.0  | 1813.6291469194300 | 3.05 | NPH | 3.0 | 2 | 700 | 19OCT2020 12:00 | LY3819253 700mg IV           |
| 10161004 | 11806298383 | G1_1180629                            |         |        |        |                    |      |     |     |   |     |                 |                              |

|          |             |                                       |       |        |        |                    |      |     |     |   |     |                 |                              |
|----------|-------------|---------------------------------------|-------|--------|--------|--------------------|------|-----|-----|---|-----|-----------------|------------------------------|
| 10011013 | 11835666691 | G12_11835666691_324023w_AG12.fastq.gz | K786R | 1.306  | 4135.0 | 3393.552757793770  | 3.15 | NAS | 3.0 | 2 | 700 | 19OCT2020 13:46 | Placebo for LY3819253 700 mg |
| 10031025 | 11852441230 | E2_11852441230_324020w_NE2.fastq.gz   | Y489_ | 100.0  | 1.0    | 1936.5590717299600 | 2.18 | NAS | 4.0 | 2 | 700 | 14NOV2020 21:39 | LY3819253 700mg IV           |
| 10031025 | 11852441230 | E2_11852441230_324020w_NE2.fastq.gz   | P491N | 100.0  | 1.0    | 1936.5590717299600 | 2.18 | NAS | 4.0 | 2 | 700 | 14NOV2020 21:39 | LY3819253 700mg IV           |
| 10031025 | 11852441230 | E2_11852441230_324020w_NE2.fastq.gz   | Y505_ | 100.0  | 1.0    | 1936.5590717299600 | 2.18 | NAS | 4.0 | 2 | 700 | 14NOV2020 21:39 | LY3819253 700mg IV           |
| 10031025 | 11852441230 | E2_11852441230_324020w_NE2.fastq.gz   | Q506K | 100.0  | 1.0    | 1936.5590717299600 | 2.18 | NAS | 4.0 | 2 | 700 | 14NOV2020 21:39 | LY3819253 700mg IV           |
| 10031025 | 11852441230 | E2_11852441230_324020w_NE2.fastq.gz   | P507K | 100.0  | 1.0    | 1936.5590717299600 | 2.18 | NAS | 4.0 | 2 | 700 | 14NOV2020 21:39 | LY3819253 700mg IV           |
| 10031025 | 11852441230 | E2_11852441230_324020w_NE2.fastq.gz   | S514Y | 100.0  | 1.0    | 1936.5590717299600 | 2.18 | NAS | 4.0 | 2 | 700 | 14NOV2020 21:39 | LY3819253 700mg IV           |
| 10031025 | 11852441230 | E2_11852441230_324020w_NE2.fastq.gz   | P527T | 100.0  | 1.0    | 1936.5590717299600 | 2.18 | NAS | 4.0 | 2 | 700 | 14NOV2020 21:39 | LY3819253 700mg IV           |
| 10051005 | 11835655685 | 15_11835655685_323555w_BB3.fastq.gz   | E484Q | 73.491 | 1856.0 | 1835.9008567931500 | 3.88 | NAS | 4.0 | 2 | 700 | 01NOV2020 21:00 | LY3819253 700mg IV           |
| 10051005 | 11835655685 | 15_11835655685_323555w_BB3.fastq.gz   | D614G | 99.858 | 1412.0 | 1835.9008567931500 | 3.88 | NAS | 4.0 | 2 | 700 | 01NOV2020 21:00 | LY3819253 700mg IV           |
| 10051004 | 11802170446 | 2_11802170446_323555w_BA2.fastq.gz    | D138H | 99.802 | 1513.0 | 1721.4775413711600 | 5.76 | NAS | 4.0 | 2 | 700 | 24OCT2020 16:15 | LY3819253 700mg IV           |
| 10051004 | 11802170446 | 2_11802170446_323555w_BA2.fastq.gz    | E484K | 97.992 | 1544.0 | 1721.4775413711600 | 5.76 | NAS | 4.0 | 2 | 700 | 24OCT2020 16:15 | LY3819253 700mg IV           |
| 10051004 | 11802170446 | 2_11802170446_323555w_BA2.fastq.gz    | D614G | 100.0  | 1277.0 | 1721.4775413711600 | 5.76 | NAS | 4.0 | 2 | 700 | 24OCT2020 16:15 | LY3819253 700mg IV           |
| 10021004 | 11800003392 | 44_11800003392_323555w_BD8.fastq.gz   | S254F | 99.943 | 1760.0 | 2017.6858190709000 | 4.3  | NAS | 4.0 | 2 | 700 | 23OCT2020 20:00 | LY3819253 700mg IV           |
| 10021004 | 11800003392 | 44_11800003392_323555w_BD8.fastq.gz   | E484Q | 55.946 | 1934.0 | 2017.6858190709000 | 4.3  | NAS | 4.0 | 2 | 700 | 23OCT2020 20:00 | LY3819253 700mg IV           |
| 10021004 | 11800003392 | 44_11800003392_323555w_BD8.fastq.gz   | D614G | 99.927 | 1370.0 | 2017.6858190709000 | 4.3  | NAS | 4.0 | 2 | 700 | 23OCT2020 20:00 | LY3819253 700mg IV           |
| 10021004 | 11800003392 | 44_11800003392_323555w_BD8.fastq.gz   | K814N | 50.0   | 2.0    | 2017.6858190709000 | 4.3  | NAS | 4.0 | 2 | 700 | 23OCT2020 20:00 | LY3819253 700mg IV           |
| 10031020 | 11852428877 | 11_28877_322847w_BA11.fastq.gz        | A27S  | 99.881 | 5063.0 | 1763.2894736842100 | 3.21 | NAS | 4.0 | 2 | 700 | 31OCT2020 10:05 | LY3819253 700mg IV           |
| 10031020 | 11852428877 | 11_28877_322847w_BA11.fastq.gz        | D614G | 99.924 | 1316.0 | 1763.2894736842100 | 3.21 | NAS | 4.0 | 2 | 700 | 31OCT2020 10:05 | LY3819253 700mg IV           |
| 10031020 | 11852428877 | 11_28877_322847w_BA11.fastq.gz        | V772I | 32.075 | 1590.0 | 1763.2894736842100 | 3.21 | NAS | 4.0 | 2 | 700 | 31OCT2020 10:05 | LY3819253 700mg IV           |
| 10171007 | 11818963136 | 7_11818963136_323283w_CD6.fastq.gz    | D614G | 100.0  | 1047.0 | 1274.587591240880  | 3.2  | NPH | 4.0 | 2 | 700 | 16NOV2020 09:50 | LY3819253 700mg IV           |
| 10311014 | 11846150272 | B1_11846150272_323690w_BB1.fastq.gz   | D614G | 99.713 | 1745.0 | 1998.4823386114500 | 6.63 | NAS | 4.0 | 2 | 700 | 21NOV2020 05:15 | Placebo for LY3819253 700 mg |
| 10251008 | 11816848197 | E6_11816848197_323690w_BE6.fastq.gz   | E484K | 99.065 | 2353.0 | 2188.2478632478600 | 6.7  | NAS | 4.0 | 2 | 700 | 30OCT2020 19:28 | LY3819253 700mg IV           |
| 10251008 | 11816848197 | E6_11816848197_323690w_BE6.fastq.gz   | D614G | 99.621 | 1847.0 | 2188.2478632478600 | 6.7  | NAS | 4.0 | 2 | 700 | 30OCT2020 19:28 | LY3819253 700mg IV           |
| 10221006 | 11820974023 | B9_11820974023_323692w_NB9.fastq.gz   | S13I  | 99.867 | 8266.0 | 2859.770451770450  | 4.08 | NAS | 4.0 | 2 | 700 | 31OCT2020 19:00 | LY3819253 700mg IV           |
| 10221006 | 11820974023 | B9_11820974023_323692w_NB9.fastq.gz   | W152C | 99.797 | 2461.0 | 2859.770451770450  | 4.08 | NAS | 4.0 | 2 | 700 | 31OCT2020 19:00 | LY3819253 700mg IV           |
| 10221006 | 11820974023 | B9_11820974023_323692w_NB9.fastq.gz   | L452R | 99.9   | 2994.0 | 2859.770451770450  | 4.08 | NAS | 4.0 | 2 | 700 | 31OCT2020 19:00 | LY3819253 700mg IV           |
| 10221006 | 11820974023 | B9_11820974023_323692w_NB9.fastq.gz   | S494L | 21.859 | 2818.0 | 2859.770451770450  | 4.08 | NAS | 4.0 | 2 | 700 | 31OCT2020 19:00 | LY3819253 700mg IV           |
| 10221006 | 11820974023 | B9_11820974023_323692w_NB9.fastq.gz   | D614G | 99.956 | 2280.0 | 2859.770451770450  | 4.08 | NAS | 4.0 | 2 | 700 | 31OCT2020 19:00 | LY3819253 700mg IV           |
| 10221006 | 11820974023 | B9_11820974023_323692w_NB9.fastq.gz   | K814N | 100.0  | 1.0    | 2859.770451770450  | 4.08 | NAS | 4.0 | 2 | 700 | 31OCT2020 19:00 | LY3819253 700mg IV           |
| 10051009 | 11818952074 | E3_11818952074_323692w_NE3.fastq.gz   | V395F | 35.794 | 2953.0 | 2978.2512254902000 | 3.06 | NAS | 4.0 | 2 | 700 | 17NOV2020 18:00 | LY3819253 700mg IV           |
| 10051009 | 11818952074 | E3_11818952074_323692w_NE3.fastq.gz   | G416E | 39.037 | 2992.0 | 2978.2512254902000 | 3.06 | NAS | 4.0 | 2 | 700 | 17NOV2020 18:00 | LY3819253 700mg IV           |
| 10051009 | 11818952074 | E3_11818952074_323692w_NE3.fastq.gz   | E484K | 42.154 | 3008.0 | 2978.2512254902000 | 3.06 | NAS | 4.0 | 2 | 700 | 17NOV2020 18:00 | LY3819253 700mg IV           |
| 10051009 | 11818952074 | E3_11818952074_323692w_NE3.fastq.gz   | D614G | 98.913 | 2391.0 | 2978.2512254902000 | 3.06 | NAS | 4.0 | 2 | 700 | 17NOV2020 18:00 | LY3819253 700mg IV           |
| 10201008 | 11854529290 | A1_11854529290_323692w_NA1.fastq.gz   | D614G | 99.805 | 2052.0 | 2519.692588092350  | 4.16 | NAS | 4.0 | 2 | 700 | 24OCT2020 18:30 | LY3819253 700mg IV           |
| 10201008 | 11854529290 | A1_11854529290_323692w_NA1.fastq.gz   | P681R | 99.682 | 1573.0 | 2519.692588092350  | 4.16 | NAS | 4.0 | 2 | 700 | 24OCT2020 18:30 | LY3819253 700mg IV           |
| 10201008 | 11854529290 | A1_11854529290_323692w_NA1.fastq.gz   | T791I | 39.548 | 1062.0 | 2519.692588092350  | 4.16 | NAS | 4.0 | 2 | 700 | 24OCT2020 18:30 | LY3819253 700mg IV           |
| 10201008 | 11854529290 | A1_11854529290_323692w_NA1.fastq.gz   | K814N | 60.0   | 5.0    | 2519.692588092350  | 4.16 | NAS | 4.0 | 2 | 700 | 24OCT2020 18:30 | LY3819253 700mg IV           |
| 10201011 | 11854529289 | A11_11854529289_323692w_NA11.fastq.gz | D614G | 99.772 | 2635.0 | 3324.2634146341500 | 6.27 | NAS | 4.0 | 2 | 700 | 31OCT2020 18:00 | Placebo for LY3819253 700 mg |
| 10261032 | 11850418894 | D6_11850418894_323692w_ND6.fastq.gz   | W258L | 87.627 | 2457.0 | 2516.12            | 4.15 | NAS | 4.0 | 2 | 700 | 16NOV2020 19:33 | Placebo for LY3819253 700 mg |
| 10261032 | 11850418894 | D6_11850418894_323692w_ND6.fastq.gz   | D614G | 99.892 | 1854.0 | 2516.12            | 4.15 | NAS | 4.0 | 2 | 700 | 16NOV2020 19:33 | Placebo for LY3819253 700 mg |
| 10051005 | 11835655685 | 15_11835655685_323555w_BB3.fastq.gz   | R78T  | 2.253  | 3152.0 | 1835.9008567931500 | 3.88 | NAS | 4.0 | 2 | 700 | 01NOV2020 21:00 | LY3819253 700mg IV           |
| 10051005 | 11835655685 | 15_11835655685_323555w_BB3.fastq.gz   | L752P | 3.282  | 518.0  | 1835.9008567931500 | 3.88 | NAS | 4.0 | 2 | 700 | 01NOV2020 21:00 | LY3819253 700mg IV           |
| 10051005 | 11835655685 | 15_11835655685_323555w_BB3.fastq.gz   | V781A | 3.194  | 720.0  | 1835.9008567931500 | 3.88 | NAS | 4.0 | 2 | 700 | 01NOV2020 21:00 | LY3819253 700mg IV           |
| 10051004 | 11802170446 | 2_11802170446_323555w_BA2.fastq.gz    | G485V | 1.932  | 1501.0 | 1721.4775413711600 | 5.76 | NAS | 4.0 | 2 | 700 | 24OCT2020 16:15 | LY3819253 700mg IV           |
| 10051004 | 11802170446 | 2_11802170446_323555w_BA2.fastq.gz    | R683S | 1.762  | 1135.0 | 1721.4775413711600 | 5.76 | NAS | 4.0 | 2 | 700 | 24OCT2020 16:15 | LY3819253 700mg IV           |
| 10051004 | 11802170446 | 2_11802170446_323555w_BA2.fastq.gz    | V687I | 4.044  | 1261.0 | 1721.4775413711600 | 5.76 | NAS | 4.0 | 2 | 700 | 24OCT2020 16:15 | LY3819253 700mg IV           |
| 10051004 | 11802170446 | 2_11802170446_323555w_BA2.fastq.gz    | F817V | 10.0   | 10.0   | 1721.4775413711600 | 5.76 | NAS | 4.0 | 2 | 700 | 24OCT2020 16:15 | LY3819253 700mg IV           |
| 10051004 | 11802170446 | 2_11802170446_323555w_BA2.fastq.gz    | G842D | 12.5   | 8.0    | 1721.4775413711600 | 5.76 | NAS | 4.0 | 2 | 700 | 24OCT2020 16:15 | LY3819253 700mg IV           |
| 10021004 | 11800003392 | 44_11800003392_323555w_BD8.fastq.gz   | E484K | 11.634 | 1934.0 | 2017.6858190709000 | 4.3  | NAS | 4.0 | 2 | 700 | 23OCT2020 20:00 | LY3819253 700mg IV           |
| 10031020 | 11852428877 | 11_28877_322847w_BA11.fastq.gz        | T22I  | 1.734  | 5248.0 | 1763.2894736842100 | 3.21 | NAS | 4.0 | 2 | 700 | 31OCT2020 10:05 | LY3819253 700mg IV           |
| 10031020 | 11852428877 | 11_28877_322847w_BA11.fastq.gz        | F59L  | 1.716  | 3089.0 | 1763.2894736842100 | 3.21 | NAS | 4.0 | 2 | 700 | 31OCT2020 10:05 | LY3819253 700mg IV           |
| 10031020 | 11852428877 | 11_28877_322847w_BA11.fastq.gz        | V90A  | 1.159  | 1899.0 | 1763.2894736842100 | 3.21 | NAS | 4.0 | 2 | 700 | 31OCT2020 10:05 | LY3819253 700mg IV           |
| 10031020 | 11852428877 | 11_28877_322847w_BA11.fastq.gz        | G103D | 2.679  | 1680.0 | 1763.2894736842100 | 3.21 | NAS | 4.0 | 2 | 700 | 31OCT2020 10:05 | LY3819253 700mg IV           |
| 10031020 | 11852428877 | 11_28877_322847w_BA11.fastq.gz        | V143F | 9.836  | 1403.0 | 1763.2894736842100 | 3.21 | NAS | 4.0 | 2 | 700 | 31OCT2020 10:05 | LY3819253 700mg IV           |
| 10031020 | 11852428877 | 11_28877_322847w_BA11.fastq.gz        | S172F | 1.861  | 1558.0 | 1763.2894736842100 | 3.21 | NAS | 4.0 | 2 | 700 | 31OCT2020 10:05 | LY3819253 700mg IV           |
| 10031020 | 11852428877 | 11_28877_322847w_BA11.fastq.gz        | V193L | 1.538  | 1625.0 | 1763.2894736842100 | 3.21 | NAS | 4.0 | 2 | 700 | 31OCT2020 10:05 | LY3819253 700mg IV           |
| 10031020 | 11852428877 | 11_28877_322847w_BA11.fastq.gz        | A222P | 1.455  | 1650.0 | 1763.2894736842100 | 3.21 | NAS | 4.0 | 2 | 700 | 31OCT2020 10:05 | LY3819253 700mg IV           |
| 10031020 | 11852428877 | 11_28877_322847w_BA11.fastq.gz        | E281K | 1.553  | 1610.0 | 1763.2894736842100 | 3.21 | NAS | 4.0 | 2 | 700 | 31OCT2020 10:05 | LY3819253 700mg IV           |
| 10031020 | 11852428877 | 11_28877_322847w_BA11.fastq.gz        | T286I | 2.331  | 1716.0 | 1763.2894736842100 | 3.21 | NAS | 4.0 | 2 | 700 | 31OCT2020 10:05 | LY3819253 700mg IV           |
| 10031020 | 11852428877 | 11_28877_322847w_BA11.fastq.gz        | T302M | 2.13   | 1784.0 | 1763.2894736842100 | 3.21 | NAS | 4.0 | 2 | 700 | 31OCT2020 10:05 | LY3819253 700mg IV           |
| 10031020 | 11852428877 | 11_28877_322847w_BA11.fastq.gz        | P322L | 2.144  | 1772.0 | 1763.2894736842100 | 3.21 | NAS | 4.0 | 2 | 700 | 31OCT2020 10:05 | LY3819253 700mg IV           |
| 10031020 | 11852428877 | 11_28877_322847w_BA11.fastq.gz        | G404S | 2.211  | 1719.0 | 1763.2894736842100 | 3.21 | NAS | 4.0 | 2 | 700 | 31OCT2020 10:05 | LY3819253 700mg IV           |
| 10031020 | 11852428877 | 11_28877_322847w_BA11.fastq.gz        | G431C | 2.615  | 1721.0 | 1763.2894736842100 | 3.21 | NAS | 4.0 | 2 | 700 | 31OCT2020 10:05 | LY3819253 700mg IV           |
| 10031020 | 11852428877 | 11_28877_322847w_BA11.fastq.gz        | G446V | 2.464  | 1745.0 | 1763.2894736842100 | 3.21 | NAS | 4.0 |   |     |                 |                              |

|          |             |                                       |         |        |        |                    |      |     |     |   |     |                 |                              |
|----------|-------------|---------------------------------------|---------|--------|--------|--------------------|------|-----|-----|---|-----|-----------------|------------------------------|
| 10171007 | 11818963136 | 7_11818963136_323283w_CD6.fastq.gz    | T604I   | 5.664  | 1077.0 | 1274.587591240880  | 3.2  | NPH | 4.0 | 2 | 700 | 16NOV2020 09:50 | LY3819253 700mg IV           |
| 10171007 | 11818963136 | 7_11818963136_323283w_CD6.fastq.gz    | L611P   | 5.503  | 1054.0 | 1274.587591240880  | 3.2  | NPH | 4.0 | 2 | 700 | 16NOV2020 09:50 | LY3819253 700mg IV           |
| 10171007 | 11818963136 | 7_11818963136_323283w_CD6.fastq.gz    | Q644K   | 5.348  | 935.0  | 1274.587591240880  | 3.2  | NPH | 4.0 | 2 | 700 | 16NOV2020 09:50 | LY3819253 700mg IV           |
| 10171007 | 11818963136 | 7_11818963136_323283w_CD6.fastq.gz    | N764T   | 3.774  | 371.0  | 1274.587591240880  | 3.2  | NPH | 4.0 | 2 | 700 | 16NOV2020 09:50 | LY3819253 700mg IV           |
| 10311014 | 11846150272 | B1_11846150272_323690w_BB1.fastq.gz   | N679H   | 2.362  | 1524.0 | 1998.4823386114500 | 6.63 | NAS | 4.0 | 2 | 700 | 21NOV2020 05:15 | Placebo for LY3819253 700 mg |
| 10311014 | 11846150272 | B1_11846150272_323690w_BB1.fastq.gz   | F782V   | 1.428  | 3572.0 | 1998.4823386114500 | 6.63 | NAS | 4.0 | 2 | 700 | 21NOV2020 05:15 | Placebo for LY3819253 700 mg |
| 10311014 | 11846150272 | B1_11846150272_323690w_BB1.fastq.gz   | A783V   | 1.435  | 3555.0 | 1998.4823386114500 | 6.63 | NAS | 4.0 | 2 | 700 | 21NOV2020 05:15 | Placebo for LY3819253 700 mg |
| 10221006 | 11820974023 | B9_11820974023_323692w_NB9.fastq.gz   | V3G     | 1.113  | 7191.0 | 2859.770451770450  | 4.08 | NAS | 4.0 | 2 | 700 | 31OCT2020 19:00 | LY3819253 700mg IV           |
| 10221006 | 11820974023 | B9_11820974023_323692w_NB9.fastq.gz   | F782V   | 1.065  | 1221.0 | 2859.770451770450  | 4.08 | NAS | 4.0 | 2 | 700 | 31OCT2020 19:00 | LY3819253 700mg IV           |
| 10221006 | 11820974023 | B9_11820974023_323692w_NB9.fastq.gz   | A783V   | 1.315  | 1217.0 | 2859.770451770450  | 4.08 | NAS | 4.0 | 2 | 700 | 31OCT2020 19:00 | LY3819253 700mg IV           |
| 10201008 | 11854529290 | A1_11854529290_323692w_NA1.fastq.gz   | A783V   | 1.018  | 1081.0 | 2519.692588092350  | 4.16 | NAS | 4.0 | 2 | 700 | 24OCT2020 18:30 | LY3819253 700mg IV           |
| 10201008 | 11854529290 | A1_11854529290_323692w_NA1.fastq.gz   | S813N   | 16.667 | 6.0    | 2519.692588092350  | 4.16 | NAS | 4.0 | 2 | 700 | 24OCT2020 18:30 | LY3819253 700mg IV           |
| 10201011 | 11854529289 | A11_11854529289_323692w_NA11.fastq.gz | S172Y   | 2.44   | 3197.0 | 3324.2634146341500 | 6.27 | NAS | 4.0 | 2 | 700 | 31OCT2020 18:00 | Placebo for LY3819253 700 mg |
| 10261032 | 11850418894 | D6_11850418894_323692w_ND6.fastq.gz   | V83A    | 1.093  | 3658.0 | 2516.12            | 4.15 | NAS | 4.0 | 2 | 700 | 16NOV2020 19:33 | Placebo for LY3819253 700 mg |
| 10261032 | 11850418894 | D6_11850418894_323692w_ND6.fastq.gz   | T109I   | 1.315  | 2814.0 | 2516.12            | 4.15 | NAS | 4.0 | 2 | 700 | 16NOV2020 19:33 | Placebo for LY3819253 700 mg |
| 10261032 | 11850418894 | D6_11850418894_323692w_ND6.fastq.gz   | L241del | 1.312  | 2211.0 | 2516.12            | 4.15 | NAS | 4.0 | 2 | 700 | 16NOV2020 19:33 | Placebo for LY3819253 700 mg |
| 10261032 | 11850418894 | D6_11850418894_323692w_ND6.fastq.gz   | L242del | 1.342  | 2161.0 | 2516.12            | 4.15 | NAS | 4.0 | 2 | 700 | 16NOV2020 19:33 | Placebo for LY3819253 700 mg |
| 10261032 | 11850418894 | D6_11850418894_323692w_ND6.fastq.gz   | G667del | 1.772  | 1637.0 | 2516.12            | 4.15 | NAS | 4.0 | 2 | 700 | 16NOV2020 19:33 | Placebo for LY3819253 700 mg |
| 10261032 | 11850418894 | D6_11850418894_323692w_ND6.fastq.gz   | A668del | 1.801  | 1610.0 | 2516.12            | 4.15 | NAS | 4.0 | 2 | 700 | 16NOV2020 19:33 | Placebo for LY3819253 700 mg |
| 10261032 | 11850418894 | D6_11850418894_323692w_ND6.fastq.gz   | G669del | 1.823  | 1591.0 | 2516.12            | 4.15 | NAS | 4.0 | 2 | 700 | 16NOV2020 19:33 | Placebo for LY3819253 700 mg |
| 10261032 | 11850418894 | D6_11850418894_323692w_ND6.fastq.gz   | I670del | 1.388  | 1585.0 | 2516.12            | 4.15 | NAS | 4.0 | 2 | 700 | 16NOV2020 19:33 | Placebo for LY3819253 700 mg |
| 10261032 | 11850418894 | D6_11850418894_323692w_ND6.fastq.gz   | C671del | 1.062  | 1600.0 | 2516.12            | 4.15 | NAS | 4.0 | 2 | 700 | 16NOV2020 19:33 | Placebo for LY3819253 700 mg |
| 10261032 | 11850418894 | D6_11850418894_323692w_ND6.fastq.gz   | A672del | 1.062  | 1600.0 | 2516.12            | 4.15 | NAS | 4.0 | 2 | 700 | 16NOV2020 19:33 | Placebo for LY3819253 700 mg |
| 10261032 | 11850418894 | D6_11850418894_323692w_ND6.fastq.gz   | S673del | 1.061  | 1602.0 | 2516.12            | 4.15 | NAS | 4.0 | 2 | 700 | 16NOV2020 19:33 | Placebo for LY3819253 700 mg |
| 10021004 | 11800002624 | 45_11800002624_323555w_BD9.fastq.gz   | S254F   | 100.0  | 1136.0 | 1386.8349514563100 | 4.9  | NAS | 5.0 | 2 | 700 | 24OCT2020 19:07 | LY3819253 700mg IV           |
| 10021004 | 11800002624 | 45_11800002624_323555w_BD9.fastq.gz   | E484K   | 96.335 | 1255.0 | 1386.8349514563100 | 4.9  | NAS | 5.0 | 2 | 700 | 24OCT2020 19:07 | LY3819253 700mg IV           |
| 10021004 | 11800002624 | 45_11800002624_323555w_BD9.fastq.gz   | D614G   | 100.0  | 965.0  | 1386.8349514563100 | 4.9  | NAS | 5.0 | 2 | 700 | 24OCT2020 19:07 | LY3819253 700mg IV           |
| 10021004 | 11800002624 | 45_11800002624_323555w_BD9.fastq.gz   | S735T   | 26.968 | 775.0  | 1386.8349514563100 | 4.9  | NAS | 5.0 | 2 | 700 | 24OCT2020 19:07 | LY3819253 700mg IV           |
| 10051004 | 11802170439 | 4_11802170439_323555w_BA4.fastq.gz    | D138H   | 99.934 | 1507.0 | 1685.8581818181800 | 6.77 | NAS | 5.0 | 2 | 700 | 25OCT2020 14:40 | LY3819253 700mg IV           |
| 10051004 | 11802170439 | 4_11802170439_323555w_BA4.fastq.gz    | E484K   | 97.759 | 1651.0 | 1685.8581818181800 | 6.77 | NAS | 5.0 | 2 | 700 | 25OCT2020 14:40 | LY3819253 700mg IV           |
| 10051004 | 11802170439 | 4_11802170439_323555w_BA4.fastq.gz    | D614G   | 99.78  | 1365.0 | 1685.8581818181800 | 6.77 | NAS | 5.0 | 2 | 700 | 25OCT2020 14:40 | LY3819253 700mg IV           |
| 10051004 | 11802170439 | 4_11802170439_323555w_BA4.fastq.gz    | K814N   | 20.513 | 39.0   | 1685.8581818181800 | 6.77 | NAS | 5.0 | 2 | 700 | 25OCT2020 14:40 | LY3819253 700mg IV           |
| 10051005 | 11835655686 | 14_11835655686_323555w_BB2.fastq.gz   | E484Q   | 97.633 | 1563.0 | 1609.5731707317100 | 3.99 | NAS | 5.0 | 2 | 700 | 02NOV2020 20:15 | LY3819253 700mg IV           |
| 10051005 | 11835655686 | 14_11835655686_323555w_BB2.fastq.gz   | D614G   | 99.851 | 1338.0 | 1609.5731707317100 | 3.99 | NAS | 5.0 | 2 | 700 | 02NOV2020 20:15 | LY3819253 700mg IV           |
| 10041003 | 11835653126 | 9_53126_322847w_BA9.fastq.gz          | D614G   | 99.886 | 1748.0 | 2232.97542997543   | 3.91 | NAS | 5.0 | 2 | 700 | 01NOV2020 16:40 | LY3819253 700mg IV           |
| 10251008 | 11839935434 | E7_11839935434_323690w_BE7.fastq.gz   | E484K   | 98.325 | 2746.0 | 2587.3454545454500 | 7.0  | NAS | 5.0 | 2 | 700 | 31OCT2020 19:42 | LY3819253 700mg IV           |
| 10251008 | 11839935434 | E7_11839935434_323690w_BE7.fastq.gz   | D614G   | 99.71  | 2414.0 | 2587.3454545454500 | 7.0  | NAS | 5.0 | 2 | 700 | 31OCT2020 19:42 | LY3819253 700mg IV           |
| 10311014 | 11846150531 | B2_11846150531_323690w_BB2.fastq.gz   | D614G   | 99.907 | 1072.0 | 1413.7469437652800 | 6.53 | NAS | 5.0 | 2 | 700 | 21NOV2020 05:30 | Placebo for LY3819253 700 mg |
| 10201011 | 11854528521 | A12_11854528521_323692w_NA12.fastq.gz | D614G   | 99.317 | 2344.0 | 3138.586585365850  | 4.42 | NAS | 5.0 | 2 | 700 | 01NOV2020 18:00 | Placebo for LY3819253 700 mg |
| 10201008 | 11854526474 | B3_11854526474_323692w_NB3.fastq.gz   | D614G   | 99.857 | 2100.0 | 2987.2041312272200 | 3.62 | NAS | 5.0 | 2 | 700 | 25OCT2020 18:30 | LY3819253 700mg IV           |
| 10201008 | 11854526474 | B3_11854526474_323692w_NB3.fastq.gz   | P681R   | 99.787 | 2343.0 | 2987.2041312272200 | 3.62 | NAS | 5.0 | 2 | 700 | 25OCT2020 18:30 | LY3819253 700mg IV           |
| 10261032 | 11850421190 | D4_11850421190_323692w_ND4.fastq.gz   | W258L   | 100.0  | 1695.0 | 2181.0849753694600 | 4.55 | NAS | 5.0 | 2 | 700 | 17NOV2020 19:21 | Placebo for LY3819253 700 mg |
| 10261032 | 11850421190 | D4_11850421190_323692w_ND4.fastq.gz   | D614G   | 99.873 | 1571.0 | 2181.0849753694600 | 4.55 | NAS | 5.0 | 2 | 700 | 17NOV2020 19:21 | Placebo for LY3819253 700 mg |
| 10051009 | 11854603458 | E4_11854603458_323692w_NE4.fastq.gz   | E484K   | 99.778 | 5412.0 | 5333.8845208845200 | 3.85 | NAS | 5.0 | 2 | 700 | 18NOV2020 19:00 | LY3819253 700mg IV           |
| 10051009 | 11854603458 | E4_11854603458_323692w_NE4.fastq.gz   | D614G   | 99.887 | 4426.0 | 5333.8845208845200 | 3.85 | NAS | 5.0 | 2 | 700 | 18NOV2020 19:00 | LY3819253 700mg IV           |
| 10021004 | 11800002624 | 45_11800002624_323555w_BD9.fastq.gz   | G142del | 1.366  | 1098.0 | 1386.8349514563100 | 4.9  | NAS | 5.0 | 2 | 700 | 24OCT2020 19:07 | LY3819253 700mg IV           |
| 10021004 | 11800002624 | 45_11800002624_323555w_BD9.fastq.gz   | V143del | 1.357  | 1105.0 | 1386.8349514563100 | 4.9  | NAS | 5.0 | 2 | 700 | 24OCT2020 19:07 | LY3819253 700mg IV           |
| 10021004 | 11800002624 | 45_11800002624_323555w_BD9.fastq.gz   | E484Q   | 3.665  | 1255.0 | 1386.8349514563100 | 4.9  | NAS | 5.0 | 2 | 700 | 24OCT2020 19:07 | LY3819253 700mg IV           |
| 10021004 | 11800002624 | 45_11800002624_323555w_BD9.fastq.gz   | K814N   | 20.0   | 5.0    | 1386.8349514563100 | 4.9  | NAS | 5.0 | 2 | 700 | 24OCT2020 19:07 | LY3819253 700mg IV           |
| 10051004 | 11802170439 | 4_11802170439_323555w_BA4.fastq.gz    | G485V   | 2.371  | 1603.0 | 1685.8581818181800 | 6.77 | NAS | 5.0 | 2 | 700 | 25OCT2020 14:40 | LY3819253 700mg IV           |
| 10051004 | 11802170439 | 4_11802170439_323555w_BA4.fastq.gz    | T732A   | 10.317 | 1105.0 | 1685.8581818181800 | 6.77 | NAS | 5.0 | 2 | 700 | 25OCT2020 14:40 | LY3819253 700mg IV           |
| 10051004 | 11802170439 | 4_11802170439_323555w_BA4.fastq.gz    | T739del | 1.685  | 1009.0 | 1685.8581818181800 | 6.77 | NAS | 5.0 | 2 | 700 | 25OCT2020 14:40 | LY3819253 700mg IV           |
| 10051004 | 11802170439 | 4_11802170439_323555w_BA4.fastq.gz    | M740del | 1.715  | 991.0  | 1685.8581818181800 | 6.77 | NAS | 5.0 | 2 | 700 | 25OCT2020 14:40 | LY3819253 700mg IV           |
| 10041003 | 11835653126 | 9_53126_322847w_BA9.fastq.gz          | Q784_   | 1.024  | 977.0  | 2232.97542997543   | 3.91 | NAS | 5.0 | 2 | 700 | 01NOV2020 16:40 | LY3819253 700mg IV           |
| 10251008 | 11839935434 | E7_11839935434_323690w_BE7.fastq.gz   | S494P   | 1.571  | 2801.0 | 2587.3454545454500 | 7.0  | NAS | 5.0 | 2 | 700 | 31OCT2020 19:42 | LY3819253 700mg IV           |
| 10251008 | 11839935434 | E7_11839935434_323690w_BE7.fastq.gz   | S735_   | 1.452  | 1860.0 | 2587.3454545454500 | 7.0  | NAS | 5.0 | 2 | 700 | 31OCT2020 19:42 | LY3819253 700mg IV           |
| 10251008 | 11839935434 | E7_11839935434_323690w_BE7.fastq.gz   | V772D   | 3.443  | 1801.0 | 2587.3454545454500 | 7.0  | NAS | 5.0 | 2 | 700 | 31OCT2020 19:42 | LY3819253 700mg IV           |
| 10251008 | 11839935434 | E7_11839935434_323690w_BE7.fastq.gz   | V785L   | 1.386  | 1660.0 | 2587.3454545454500 | 7.0  | NAS | 5.0 | 2 | 700 | 31OCT2020 19:42 | LY3819253 700mg IV           |
| 10201011 | 11854528521 | A12_11854528521_323692w_NA12.fastq.gz | S172Y   | 3.931  | 2722.0 | 3138.586585365850  | 4.42 | NAS | 5.0 | 2 | 700 | 01NOV2020 18:00 | Placebo for LY3819253 700 mg |
| 10201011 | 11854528521 | A12_11854528521_323692w_NA12.fastq.gz | K378_   | 1.211  | 2973.0 | 3138.586585365850  | 4.42 | NAS | 5.0 | 2 | 700 | 01NOV2020 18:00 | Placebo for LY3819253 700 mg |
| 10201008 | 11854526474 | B3_11854526474_323692w_NB3.fastq.gz   | S31T    | 1.669  | 7369.0 | 2987.2041312272200 | 3.62 | NAS | 5.0 | 2 | 700 | 25OCT2020 18:30 | LY3819253 700mg IV           |
| 10201008 | 11854526474 | B3_11854526474_323692w_NB3.fastq.gz   | D80Y    | 4.486  | 3522.0 | 2987.2041312272200 | 3.62 | NAS | 5.0 | 2 | 700 | 25OCT2020 18:30 | LY3819253 700mg IV           |
| 10201008 | 11854526474 | B3_11854526474_323692w_NB3.fastq.gz   | V126F   | 1.454  | 2407.0 | 2987.2041312272200 | 3.62 | NAS | 5.0 | 2 | 700 | 25OCT2020 18:30 | LY3819253 700mg IV           |
| 10201008 | 11854526474 | B3_11854526474_323692w_NB3.fastq.gz   | G142C   | 3.158  | 2343.0 | 2987.2041312272200 | 3.62 | NAS | 5.0 | 2 | 700 | 25OCT2020 18:30 | LY3819253 700mg IV           |
| 10201008 | 11854526474 | B3_11854526474_323692w_NB3.fastq.gz   | S383P   | 2.049  | 2684.0 | 2987.2041312272200 | 3.62 | NAS |     |   |     |                 |                              |

|          |             |                                       |         |        |        |                    |      |     |     |   |     |                 |                              |
|----------|-------------|---------------------------------------|---------|--------|--------|--------------------|------|-----|-----|---|-----|-----------------|------------------------------|
| 10051005 | 11802170436 | 16_11802170436_323555w_BB4.fastq.gz   | K814N   | 100.0  | 1.0    | 1156.2515188335400 | 4.22 | NAS | 6.0 | 2 | 700 | 03NOV2020 20:30 | LY3819253 700mg IV           |
| 10661002 | 11833578885 | 16_11833578885_323230w_CE6.fastq.gz   | S494P   | 99.778 | 2702.0 | 2635.283615819210  | 7.0  | NAS | 6.0 | 2 | 700 | 20NOV2020 22:20 | LY3819253 700mg IV           |
| 10661002 | 11833578885 | 16_11833578885_323230w_CE6.fastq.gz   | N501Y   | 99.851 | 2688.0 | 2635.283615819210  | 7.0  | NAS | 6.0 | 2 | 700 | 20NOV2020 22:20 | LY3819253 700mg IV           |
| 10661002 | 11833578885 | 16_11833578885_323230w_CE6.fastq.gz   | D614G   | 99.913 | 2290.0 | 2635.283615819210  | 7.0  | NAS | 6.0 | 2 | 700 | 20NOV2020 22:20 | LY3819253 700mg IV           |
| 10661002 | 11833578885 | 16_11833578885_323230w_CE6.fastq.gz   | P681H   | 99.835 | 1821.0 | 2635.283615819210  | 7.0  | NAS | 6.0 | 2 | 700 | 20NOV2020 22:20 | LY3819253 700mg IV           |
| 10031013 | 11802119815 | 76_19815_322847w_BG4.fastq.gz         | S13I    | 99.871 | 5425.0 | 1540.0849514563100 | 3.12 | NAS | 6.0 | 2 | 700 | 20OCT2020 20:18 | Placebo for LY3819253 700 mg |
| 10031013 | 11802119815 | 76_19815_322847w_BG4.fastq.gz         | W152C   | 100.0  | 1330.0 | 1540.0849514563100 | 3.12 | NAS | 6.0 | 2 | 700 | 20OCT2020 20:18 | Placebo for LY3819253 700 mg |
| 10031013 | 11802119815 | 76_19815_322847w_BG4.fastq.gz         | L452R   | 99.865 | 1480.0 | 1540.0849514563100 | 3.12 | NAS | 6.0 | 2 | 700 | 20OCT2020 20:18 | Placebo for LY3819253 700 mg |
| 10031013 | 11802119815 | 76_19815_322847w_BG4.fastq.gz         | D614G   | 99.836 | 1222.0 | 1540.0849514563100 | 3.12 | NAS | 6.0 | 2 | 700 | 20OCT2020 20:18 | Placebo for LY3819253 700 mg |
| 10031013 | 11802119815 | 76_19815_322847w_BG4.fastq.gz         | G769V   | 99.785 | 929.0  | 1540.0849514563100 | 3.12 | NAS | 6.0 | 2 | 700 | 20OCT2020 20:18 | Placebo for LY3819253 700 mg |
| 10031013 | 11802119815 | 76_19815_322847w_BG4.fastq.gz         | K814N   | 33.333 | 3.0    | 1540.0849514563100 | 3.12 | NAS | 6.0 | 2 | 700 | 20OCT2020 20:18 | Placebo for LY3819253 700 mg |
| 10261032 | 11821040072 | H11_11821040072_324019w_CH11.fastq.gz | Q314K   | 20.488 | 2255.0 | 2983.40097799511   | 2.73 | NAS | 6.0 | 2 | 700 | 18NOV2020 19:16 | Placebo for LY3819253 700 mg |
| 10261032 | 11821040072 | H11_11821040072_324019w_CH11.fastq.gz | D614G   | 99.736 | 2271.0 | 2983.40097799511   | 2.73 | NAS | 6.0 | 2 | 700 | 18NOV2020 19:16 | Placebo for LY3819253 700 mg |
| 10251008 | 11839934667 | E10_11839934667_323690w_BE10.fastq.gz | E484K   | 41.911 | 1706.0 | 2302.045398773010  | 5.46 | NAS | 6.0 | 2 | 700 | 01NOV2020 20:00 | LY3819253 700mg IV           |
| 10251008 | 11839934667 | E10_11839934667_323690w_BE10.fastq.gz | D614G   | 99.747 | 1584.0 | 2302.045398773010  | 5.46 | NAS | 6.0 | 2 | 700 | 01NOV2020 20:00 | LY3819253 700mg IV           |
| 10221006 | 11820972999 | B8_11820972999_323692w_NB8.fastq.gz   | S13I    | 99.844 | 7675.0 | 2230.3357843137300 | 2.62 | NAS | 6.0 | 2 | 700 | 02NOV2020 19:20 | LY3819253 700mg IV           |
| 10221006 | 11820972999 | B8_11820972999_323692w_NB8.fastq.gz   | W152C   | 99.848 | 1971.0 | 2230.3357843137300 | 2.62 | NAS | 6.0 | 2 | 700 | 02NOV2020 19:20 | LY3819253 700mg IV           |
| 10221006 | 11820972999 | B8_11820972999_323692w_NB8.fastq.gz   | L452R   | 99.824 | 2270.0 | 2230.3357843137300 | 2.62 | NAS | 6.0 | 2 | 700 | 02NOV2020 19:20 | LY3819253 700mg IV           |
| 10221006 | 11820972999 | B8_11820972999_323692w_NB8.fastq.gz   | D614G   | 99.753 | 1620.0 | 2230.3357843137300 | 2.62 | NAS | 6.0 | 2 | 700 | 02NOV2020 19:20 | LY3819253 700mg IV           |
| 10051009 | 11854601672 | E5_11854601672_323692w_NE5.fastq.gz   | E484K   | 99.265 | 4082.0 | 3969.7322738386300 | 4.53 | NAS | 6.0 | 2 | 700 | 20NOV2020 19:00 | LY3819253 700mg IV           |
| 10051009 | 11854601672 | E5_11854601672_323692w_NE5.fastq.gz   | D614G   | 99.907 | 3219.0 | 3969.7322738386300 | 4.53 | NAS | 6.0 | 2 | 700 | 20NOV2020 19:00 | LY3819253 700mg IV           |
| 10201011 | 11854526728 | B1_11854526728_323692w_NB1.fastq.gz   | D614G   | 99.829 | 1752.0 | 2143.233782129740  | 4.5  | NAS | 6.0 | 2 | 700 | 02NOV2020 18:00 | Placebo for LY3819253 700 mg |
| 10201008 | 11854528771 | A2_11854528771_323692w_NA2.fastq.gz   | E484K   | 92.245 | 2192.0 | 2316.40245398773   | 2.59 | NAS | 6.0 | 2 | 700 | 26OCT2020 18:30 | LY3819253 700mg IV           |
| 10201008 | 11854528771 | A2_11854528771_323692w_NA2.fastq.gz   | D614G   | 99.788 | 1891.0 | 2316.40245398773   | 2.59 | NAS | 6.0 | 2 | 700 | 26OCT2020 18:30 | LY3819253 700mg IV           |
| 10201008 | 11854528771 | A2_11854528771_323692w_NA2.fastq.gz   | P681R   | 100.0  | 1486.0 | 2316.40245398773   | 2.59 | NAS | 6.0 | 2 | 700 | 26OCT2020 18:30 | LY3819253 700mg IV           |
| 10021004 | 11800001344 | 46_11800001344_323555w_BD10.fastq.gz  | L141del | 8.203  | 256.0  | 2424.9891041162200 | 4.27 | NAS | 6.0 | 2 | 700 | 25OCT2020 21:05 | LY3819253 700mg IV           |
| 10021004 | 11800001344 | 46_11800001344_323555w_BD10.fastq.gz  | Y144F   | 2.105  | 285.0  | 2424.9891041162200 | 4.27 | NAS | 6.0 | 2 | 700 | 25OCT2020 21:05 | LY3819253 700mg IV           |
| 10021004 | 11800001344 | 46_11800001344_323555w_BD10.fastq.gz  | E484Q   | 9.996  | 2371.0 | 2424.9891041162200 | 4.27 | NAS | 6.0 | 2 | 700 | 25OCT2020 21:05 | LY3819253 700mg IV           |
| 10021004 | 11800001344 | 46_11800001344_323555w_BD10.fastq.gz  | T618I   | 1.758  | 1820.0 | 2424.9891041162200 | 4.27 | NAS | 6.0 | 2 | 700 | 25OCT2020 21:05 | LY3819253 700mg IV           |
| 10051005 | 11802170436 | 16_11802170436_323555w_BB4.fastq.gz   | S60P    | 1.023  | 2737.0 | 1156.2515188335400 | 4.22 | NAS | 6.0 | 2 | 700 | 03NOV2020 20:30 | LY3819253 700mg IV           |
| 10051005 | 11802170436 | 16_11802170436_323555w_BB4.fastq.gz   | D138Y   | 1.921  | 989.0  | 1156.2515188335400 | 4.22 | NAS | 6.0 | 2 | 700 | 03NOV2020 20:30 | LY3819253 700mg IV           |
| 10051005 | 11802170436 | 16_11802170436_323555w_BB4.fastq.gz   | F194L   | 1.483  | 944.0  | 1156.2515188335400 | 4.22 | NAS | 6.0 | 2 | 700 | 03NOV2020 20:30 | LY3819253 700mg IV           |
| 10051005 | 11802170436 | 16_11802170436_323555w_BB4.fastq.gz   | G219V   | 2.335  | 985.0  | 1156.2515188335400 | 4.22 | NAS | 6.0 | 2 | 700 | 03NOV2020 20:30 | LY3819253 700mg IV           |
| 10051005 | 11802170436 | 16_11802170436_323555w_BB4.fastq.gz   | Q409K   | 1.764  | 1134.0 | 1156.2515188335400 | 4.22 | NAS | 6.0 | 2 | 700 | 03NOV2020 20:30 | LY3819253 700mg IV           |
| 10051005 | 11802170436 | 16_11802170436_323555w_BB4.fastq.gz   | G416E   | 1.125  | 1156.0 | 1156.2515188335400 | 4.22 | NAS | 6.0 | 2 | 700 | 03NOV2020 20:30 | LY3819253 700mg IV           |
| 10051005 | 11802170436 | 16_11802170436_323555w_BB4.fastq.gz   | F562L   | 1.909  | 943.0  | 1156.2515188335400 | 4.22 | NAS | 6.0 | 2 | 700 | 03NOV2020 20:30 | LY3819253 700mg IV           |
| 10051005 | 11802170436 | 16_11802170436_323555w_BB4.fastq.gz   | S758R   | 1.261  | 238.0  | 1156.2515188335400 | 4.22 | NAS | 6.0 | 2 | 700 | 03NOV2020 20:30 | LY3819253 700mg IV           |
| 10661002 | 11833578885 | 16_11833578885_323230w_CE6.fastq.gz   | F43S    | 1.38   | 6378.0 | 2635.283615819210  | 7.0  | NAS | 6.0 | 2 | 700 | 20NOV2020 22:20 | LY3819253 700mg IV           |
| 10661002 | 11833578885 | 16_11833578885_323230w_CE6.fastq.gz   | N710Y   | 2.047  | 1759.0 | 2635.283615819210  | 7.0  | NAS | 6.0 | 2 | 700 | 20NOV2020 22:20 | LY3819253 700mg IV           |
| 10031013 | 11802119815 | 76_19815_322847w_BG4.fastq.gz         | L54S    | 3.11   | 3408.0 | 1540.0849514563100 | 3.12 | NAS | 6.0 | 2 | 700 | 20OCT2020 20:18 | Placebo for LY3819253 700 mg |
| 10031013 | 11802119815 | 76_19815_322847w_BG4.fastq.gz         | Q134H   | 2.388  | 1382.0 | 1540.0849514563100 | 3.12 | NAS | 6.0 | 2 | 700 | 20OCT2020 20:18 | Placebo for LY3819253 700 mg |
| 10031013 | 11802119815 | 76_19815_322847w_BG4.fastq.gz         | V143F   | 2.814  | 1315.0 | 1540.0849514563100 | 3.12 | NAS | 6.0 | 2 | 700 | 20OCT2020 20:18 | Placebo for LY3819253 700 mg |
| 10031013 | 11802119815 | 76_19815_322847w_BG4.fastq.gz         | R346S   | 3.07   | 1368.0 | 1540.0849514563100 | 3.12 | NAS | 6.0 | 2 | 700 | 20OCT2020 20:18 | Placebo for LY3819253 700 mg |
| 10261032 | 11821040072 | H11_11821040072_324019w_CH11.fastq.gz | L241del | 6.88   | 1250.0 | 2983.40097799511   | 2.73 | NAS | 6.0 | 2 | 700 | 18NOV2020 19:16 | Placebo for LY3819253 700 mg |
| 10261032 | 11821040072 | H11_11821040072_324019w_CH11.fastq.gz | L242del | 7.19   | 1210.0 | 2983.40097799511   | 2.73 | NAS | 6.0 | 2 | 700 | 18NOV2020 19:16 | Placebo for LY3819253 700 mg |
| 10261032 | 11821040072 | H11_11821040072_324019w_CH11.fastq.gz | R765C   | 13.117 | 831.0  | 2983.40097799511   | 2.73 | NAS | 6.0 | 2 | 700 | 18NOV2020 19:16 | Placebo for LY3819253 700 mg |
| 10261032 | 11821040072 | H11_11821040072_324019w_CH11.fastq.gz | K786R   | 1.283  | 2417.0 | 2983.40097799511   | 2.73 | NAS | 6.0 | 2 | 700 | 18NOV2020 19:16 | Placebo for LY3819253 700 mg |
| 10251008 | 11839934667 | E10_11839934667_323690w_BE10.fastq.gz | S494P   | 1.424  | 1756.0 | 2302.045398773010  | 5.46 | NAS | 6.0 | 2 | 700 | 01NOV2020 20:00 | LY3819253 700mg IV           |
| 10221006 | 11820972999 | B8_11820972999_323692w_NB8.fastq.gz   | E309Q   | 6.03   | 2156.0 | 2230.3357843137300 | 2.62 | NAS | 6.0 | 2 | 700 | 02NOV2020 19:20 | LY3819253 700mg IV           |
| 10221006 | 11820972999 | B8_11820972999_323692w_NB8.fastq.gz   | P322L   | 4.468  | 2126.0 | 2230.3357843137300 | 2.62 | NAS | 6.0 | 2 | 700 | 02NOV2020 19:20 | LY3819253 700mg IV           |
| 10221006 | 11820972999 | B8_11820972999_323692w_NB8.fastq.gz   | S494L   | 18.923 | 1987.0 | 2230.3357843137300 | 2.62 | NAS | 6.0 | 2 | 700 | 02NOV2020 19:20 | LY3819253 700mg IV           |
| 10201011 | 11854526728 | B1_11854526728_323692w_NB1.fastq.gz   | M177I   | 1.399  | 1858.0 | 2143.233782129740  | 4.5  | NAS | 6.0 | 2 | 700 | 02NOV2020 18:00 | Placebo for LY3819253 700 mg |
| 10201011 | 11854526728 | B1_11854526728_323692w_NB1.fastq.gz   | L513F   | 1.172  | 2047.0 | 2143.233782129740  | 4.5  | NAS | 6.0 | 2 | 700 | 02NOV2020 18:00 | Placebo for LY3819253 700 mg |
| 10201011 | 11854526728 | B1_11854526728_323692w_NB1.fastq.gz   | F718S   | 1.277  | 1410.0 | 2143.233782129740  | 4.5  | NAS | 6.0 | 2 | 700 | 02NOV2020 18:00 | Placebo for LY3819253 700 mg |
| 10201011 | 11854526728 | B1_11854526728_323692w_NB1.fastq.gz   | T723I   | 1.314  | 1370.0 | 2143.233782129740  | 4.5  | NAS | 6.0 | 2 | 700 | 02NOV2020 18:00 | Placebo for LY3819253 700 mg |
| 10201008 | 11854528771 | A2_11854528771_323692w_NA2.fastq.gz   | E154G   | 3.248  | 2063.0 | 2316.40245398773   | 2.59 | NAS | 6.0 | 2 | 700 | 26OCT2020 18:30 | LY3819253 700mg IV           |
| 10691001 | 11802103492 | A12_11802103492_NTD_S1_323570w_NA1.f  | S297L   | 99.897 | 2914.0 | 3802.924485125860  | 2.03 | NPH | 7.0 | 2 | 700 | 12NOV2020 14:55 | Placebo for LY3819253 700 mg |
| 10691001 | 11802103492 | A12_11802103492_NTD_S1_323570w_NA1.f  | T333I   | 99.785 | 4177.0 | 3802.924485125860  | 2.03 | NPH | 7.0 | 2 | 700 | 12NOV2020 14:55 | Placebo for LY3819253 700 mg |
| 10421018 | 11856716238 | C6_11856716238_NTD_S1_323570w_NC6.f   | F140del | 33.333 | 3.0    | 3010.508009153320  | 2.25 | NPH | 7.0 | 2 | 700 | 23NOV2020 12:15 | LY3819253 700mg IV           |
| 10421018 | 11856716238 | C6_11856716238_NTD_S1_323570w_NC6.f   | L141del | 100.0  | 1139.0 | 3010.508009153320  | 2.25 | NPH | 7.0 | 2 | 700 | 23NOV2020 12:15 | LY3819253 700mg IV           |
| 10421018 | 11856716238 | C6_11856716238_NTD_S1_323570w_NC6.f   | G142del | 100.0  | 1141.0 | 3010.508009153320  | 2.25 | NPH | 7.0 | 2 | 700 | 23NOV2020 12:15 | LY3819253 700mg IV           |
| 10421018 | 11856716238 | C6_11856716238_NTD_S1_323570w_NC6.f   | V143del | 100.0  | 1141.0 | 3010.508009153320  | 2.25 | NPH | 7.0 | 2 | 700 | 23NOV2020 12:15 | LY3819253 700mg IV           |
| 10421018 | 11856716238 | C6_11856716238_NTD_S1_323570w_NC6.f   | Y144del | 66.667 | 3.0    | 3010.508009153320  | 2.25 | NPH | 7.0 | 2 | 700 | 23NOV2020 12:15 | LY3819253 700mg IV           |
| 10421018 | 11856716238 | C6_11856716238_NTD_S1_323570w_NC6.f   | Y144S   | 33.333 | 3.0    | 3010.508009153320  | 2.25 | NPH | 7.0 | 2 | 700 | 23NOV2020 12:15 | LY3819253 700mg IV           |
| 10111004 | 11837821444 | B12_11837821444_324020w               |         |        |        |                    |      |     |     |   |     |                 |                              |

|          |             |                                       |         |        |        |                    |      |     |     |   |     |                 |                              |
|----------|-------------|---------------------------------------|---------|--------|--------|--------------------|------|-----|-----|---|-----|-----------------|------------------------------|
| 10561002 | 11839941187 | C5_11839941187_324020w_NC5.fastq.gz   | D614G   | 99.878 | 820.0  | 1433.4459134615400 | 3.66 | NPH | 7.0 | 2 | 700 | 30OCT2020 14:08 | LY3819253 700mg IV           |
| 10561002 | 11839941187 | C5_11839941187_324020w_NC5.fastq.gz   | Q677H   | 99.857 | 699.0  | 1433.4459134615400 | 3.66 | NPH | 7.0 | 2 | 700 | 30OCT2020 14:08 | LY3819253 700mg IV           |
| 10421013 | 11852451528 | E12_11852451528_324020w_NE12.fastq.gz | L189F   | 29.036 | 954.0  | 2110.622411693060  | 2.34 | NPH | 7.0 | 2 | 700 | 10NOV2020 11:34 | Placebo for LY3819253 700 mg |
| 10421013 | 11852451528 | E12_11852451528_324020w_NE12.fastq.gz | D614G   | 99.647 | 1415.0 | 2110.622411693060  | 2.34 | NPH | 7.0 | 2 | 700 | 10NOV2020 11:34 | Placebo for LY3819253 700 mg |
| 10261031 | 11848332108 | D3_11848332108_324020w_ND3.fastq.gz   | D614G   | 99.943 | 1769.0 | 2272.9853658536600 | 2.61 | NPH | 7.0 | 2 | 700 | 19NOV2020 12:07 | Placebo for LY3819253 700 mg |
| 10261031 | 11848332108 | D3_11848332108_324020w_ND3.fastq.gz   | L753F   | 45.718 | 759.0  | 2272.9853658536600 | 2.61 | NPH | 7.0 | 2 | 700 | 19NOV2020 12:07 | Placebo for LY3819253 700 mg |
| 10261031 | 11848332108 | D3_11848332108_324020w_ND3.fastq.gz   | K814M   | 50.0   | 2.0    | 2272.9853658536600 | 2.61 | NPH | 7.0 | 2 | 700 | 19NOV2020 12:07 | Placebo for LY3819253 700 mg |
| 10261031 | 11848332108 | D3_11848332108_324020w_ND3.fastq.gz   | K814N   | 50.0   | 2.0    | 2272.9853658536600 | 2.61 | NPH | 7.0 | 2 | 700 | 19NOV2020 12:07 | Placebo for LY3819253 700 mg |
| 10261031 | 11848332108 | D3_11848332108_324020w_ND3.fastq.gz   | S816L   | 100.0  | 1.0    | 2272.9853658536600 | 2.61 | NPH | 7.0 | 2 | 700 | 19NOV2020 12:07 | Placebo for LY3819253 700 mg |
| 10891007 | 11848251776 | D4_11848251776_324020w_ND4.fastq.gz   | D614G   | 99.929 | 1417.0 | 2450.310303030300  | 2.73 | NPH | 7.0 | 2 | 700 | 23NOV2020 08:31 | Placebo for LY3819253 700 mg |
| 10151004 | 11800018945 | F3_11800018945_324020w_NF3.fastq.gz   | D614G   | 100.0  | 14.0   | 1439.9048780487800 | 2.26 | NPH | 7.0 | 2 | 700 | 19NOV2020 09:34 | Placebo for LY3819253 700 mg |
| 10151004 | 11800018945 | F3_11800018945_324020w_NF3.fastq.gz   | K814N   | 100.0  | 1.0    | 1439.9048780487800 | 2.26 | NPH | 7.0 | 2 | 700 | 19NOV2020 09:34 | Placebo for LY3819253 700 mg |
| 10011016 | 11823139853 | 11_39853_322873w_NG9.fastq.gz         | D614G   | 100.0  | 1218.0 | 2022.8755980861200 | 3.06 | NPH | 7.0 | 2 | 700 | 05NOV2020 10:36 | Placebo for LY3819253 700 mg |
| 10951002 | 11844109443 | 33_11844109443_323284w_NC9.fastq.gz   | D614G   | 99.81  | 527.0  | 694.0467404674050  | 4.37 | NPH | 7.0 | 2 | 700 | 16NOV2020 08:50 | LY3819253 700mg IV           |
| 10241005 | 11837827136 | 55_11837827136_323284w_NE7.fastq.gz   | D614G   | 100.0  | 439.0  | 574.9537149817300  | 2.98 | NPH | 7.0 | 2 | 700 | 20NOV2020 08:32 | Placebo for LY3819253 700 mg |
| 10241006 | 11800010247 | 56_11800010247_323284w_NE8.fastq.gz   | D614G   | 100.0  | 467.0  | 580.3766707168890  | 3.12 | NPH | 7.0 | 2 | 700 | 20NOV2020 09:17 | LY3819253 700mg IV           |
| 10051004 | 11835659340 | 89_11835659340_323284w_NH5.fastq.gz   | D138H   | 100.0  | 1084.0 | 1043.3509389671400 | 6.03 | NPH | 7.0 | 2 | 700 | 26OCT2020 09:56 | LY3819253 700mg IV           |
| 10051004 | 11835659340 | 89_11835659340_323284w_NH5.fastq.gz   | E484K   | 97.376 | 1067.0 | 1043.3509389671400 | 6.03 | NPH | 7.0 | 2 | 700 | 26OCT2020 09:56 | LY3819253 700mg IV           |
| 10051004 | 11835659340 | 89_11835659340_323284w_NH5.fastq.gz   | D614G   | 99.889 | 903.0  | 1043.3509389671400 | 6.03 | NPH | 7.0 | 2 | 700 | 26OCT2020 09:56 | LY3819253 700mg IV           |
| 10021004 | 11833557056 | 72_11833557056_323284w_NF12.fastq.gz  | P9L     | 33.208 | 2400.0 | 815.0711743772240  | 4.95 | NPH | 7.0 | 2 | 700 | 26OCT2020 11:30 | LY3819253 700mg IV           |
| 10021004 | 11833557056 | 72_11833557056_323284w_NF12.fastq.gz  | S254F   | 99.577 | 710.0  | 815.0711743772240  | 4.95 | NPH | 7.0 | 2 | 700 | 26OCT2020 11:30 | LY3819253 700mg IV           |
| 10021004 | 11833557056 | 72_11833557056_323284w_NF12.fastq.gz  | E484Q   | 99.063 | 747.0  | 815.0711743772240  | 4.95 | NPH | 7.0 | 2 | 700 | 26OCT2020 11:30 | LY3819253 700mg IV           |
| 10021004 | 11833557056 | 72_11833557056_323284w_NF12.fastq.gz  | D614G   | 99.831 | 593.0  | 815.0711743772240  | 4.95 | NPH | 7.0 | 2 | 700 | 26OCT2020 11:30 | LY3819253 700mg IV           |
| 10141004 | 11806310478 | 93_11806310478_323284w_NH9.fastq.gz   | D614G   | 100.0  | 618.0  | 806.8954489544900  | 2.78 | NPH | 7.0 | 2 | 700 | 29OCT2020 10:05 | LY3819253 700mg IV           |
| 10121005 | 11804194633 | 90_11804194633_323284w_NH6.fastq.gz   | D614G   | 99.793 | 484.0  | 607.8952496954930  | 4.82 | NPH | 7.0 | 2 | 700 | 28OCT2020 13:00 | Placebo for LY3819253 700 mg |
| 10891003 | 11835746763 | 28_11835746763_323284w_NC4.fastq.gz   | D614G   | 100.0  | 788.0  | 940.0575275397800  | 3.66 | NPH | 7.0 | 2 | 700 | 13NOV2020 12:10 | Placebo for LY3819253 700 mg |
| 11061001 | 11821057357 | 13_11821057357_323284w_NB1.fastq.gz   | D614G   | 99.73  | 371.0  | 517.5319662243670  | 3.0  | NPH | 7.0 | 2 | 700 | 11NOV2020 08:05 | LY3819253 700mg IV           |
| 10261029 | 11856718351 | 3_11856718351_323284w_NA3.fastq.gz    | T20I    | 99.779 | 1814.0 | 676.3702801461630  | 3.21 | NPH | 7.0 | 2 | 700 | 05NOV2020 15:31 | LY3819253 700mg IV           |
| 10261029 | 11856718351 | 3_11856718351_323284w_NA3.fastq.gz    | D614G   | 99.464 | 560.0  | 676.3702801461630  | 3.21 | NPH | 7.0 | 2 | 700 | 05NOV2020 15:31 | LY3819253 700mg IV           |
| 10371008 | 11844109707 | 39_11844109707_323284w_ND3.fastq.gz   | D614G   | 100.0  | 825.0  | 1023.2             | 4.28 | NPH | 7.0 | 2 | 700 | 18NOV2020 12:20 | Placebo for LY3819253 700 mg |
| 10371008 | 11844109707 | 39_11844109707_323284w_ND3.fastq.gz   | P681R   | 100.0  | 824.0  | 1023.2             | 4.28 | NPH | 7.0 | 2 | 700 | 18NOV2020 12:20 | Placebo for LY3819253 700 mg |
| 10261028 | 11856718349 | 2_11856718349_323284w_NA2.fastq.gz    | M177I   | 99.836 | 608.0  | 659.5128518971850  | 2.35 | NPH | 7.0 | 2 | 700 | 05NOV2020 09:58 | LY3819253 700mg IV           |
| 10261028 | 11856718349 | 2_11856718349_323284w_NA2.fastq.gz    | D614G   | 99.82  | 555.0  | 659.5128518971850  | 2.35 | NPH | 7.0 | 2 | 700 | 05NOV2020 09:58 | LY3819253 700mg IV           |
| 10161005 | 11852442188 | 67_11852442188_323284w_NF7.fastq.gz   | D614G   | 99.894 | 943.0  | 1289.0721271393600 | 5.3  | NPH | 7.0 | 2 | 700 | 06NOV2020 07:45 | Placebo for LY3819253 700 mg |
| 10051004 | 11835657295 | 1_11835657295_323555w_BA1.fastq.gz    | D138H   | 99.855 | 1380.0 | 1607.133495145630  | 7.77 | NAS | 7.0 | 2 | 700 | 26OCT2020 09:56 | LY3819253 700mg IV           |
| 10051004 | 11835657295 | 1_11835657295_323555w_BA1.fastq.gz    | E484K   | 99.598 | 1494.0 | 1607.133495145630  | 7.77 | NAS | 7.0 | 2 | 700 | 26OCT2020 09:56 | LY3819253 700mg IV           |
| 10051004 | 11835657295 | 1_11835657295_323555w_BA1.fastq.gz    | D614G   | 99.922 | 1275.0 | 1607.133495145630  | 7.77 | NAS | 7.0 | 2 | 700 | 26OCT2020 09:56 | LY3819253 700mg IV           |
| 10051004 | 11835657295 | 1_11835657295_323555w_BA1.fastq.gz    | L821V   | 83.333 | 6.0    | 1607.133495145630  | 7.77 | NAS | 7.0 | 2 | 700 | 26OCT2020 09:56 | LY3819253 700mg IV           |
| 10021004 | 11833555011 | 47_11833555011_323555w_BD11.fastq.gz  | G142del | 25.753 | 1394.0 | 2324.278928136420  | 3.56 | NAS | 7.0 | 2 | 700 | 26OCT2020 11:29 | LY3819253 700mg IV           |
| 10021004 | 11833555011 | 47_11833555011_323555w_BD11.fastq.gz  | V143del | 24.649 | 1424.0 | 2324.278928136420  | 3.56 | NAS | 7.0 | 2 | 700 | 26OCT2020 11:29 | LY3819253 700mg IV           |
| 10021004 | 11833555011 | 47_11833555011_323555w_BD11.fastq.gz  | S254F   | 100.0  | 2017.0 | 2324.278928136420  | 3.56 | NAS | 7.0 | 2 | 700 | 26OCT2020 11:29 | LY3819253 700mg IV           |
| 10021004 | 11833555011 | 47_11833555011_323555w_BD11.fastq.gz  | E484Q   | 55.451 | 2128.0 | 2324.278928136420  | 3.56 | NAS | 7.0 | 2 | 700 | 26OCT2020 11:29 | LY3819253 700mg IV           |
| 10021004 | 11833555011 | 47_11833555011_323555w_BD11.fastq.gz  | E484K   | 44.455 | 2128.0 | 2324.278928136420  | 3.56 | NAS | 7.0 | 2 | 700 | 26OCT2020 11:29 | LY3819253 700mg IV           |
| 10021004 | 11833555011 | 47_11833555011_323555w_BD11.fastq.gz  | D614G   | 99.942 | 1729.0 | 2324.278928136420  | 3.56 | NAS | 7.0 | 2 | 700 | 26OCT2020 11:29 | LY3819253 700mg IV           |
| 10021004 | 11833555011 | 47_11833555011_323555w_BD11.fastq.gz  | T618I   | 25.95  | 1711.0 | 2324.278928136420  | 3.56 | NAS | 7.0 | 2 | 700 | 26OCT2020 11:29 | LY3819253 700mg IV           |
| 10021004 | 11833555011 | 47_11833555011_323555w_BD11.fastq.gz  | K814N   | 50.0   | 2.0    | 2324.278928136420  | 3.56 | NAS | 7.0 | 2 | 700 | 26OCT2020 11:29 | LY3819253 700mg IV           |
| 10051005 | 11802168399 | 19_11802168399_323555w_BB7.fastq.gz   | E484Q   | 80.166 | 1447.0 | 1575.203431372550  | 2.85 | NAS | 7.0 | 2 | 700 | 04NOV2020 20:20 | LY3819253 700mg IV           |
| 10051005 | 11802168399 | 19_11802168399_323555w_BB7.fastq.gz   | D614G   | 100.0  | 1126.0 | 1575.203431372550  | 2.85 | NAS | 7.0 | 2 | 700 | 04NOV2020 20:20 | LY3819253 700mg IV           |
| 10051005 | 11802168399 | 19_11802168399_323555w_BB7.fastq.gz   | K814N   | 100.0  | 2.0    | 1575.203431372550  | 2.85 | NAS | 7.0 | 2 | 700 | 04NOV2020 20:20 | LY3819253 700mg IV           |
| 10051005 | 11835722575 | 18_11835722575_323555w_BB6.fastq.gz   | E484Q   | 100.0  | 1489.0 | 1624.9975490196100 | 3.37 | NAS | 7.0 | 2 | 700 | 05NOV2020 10:15 | LY3819253 700mg IV           |
| 10051005 | 11835722575 | 18_11835722575_323555w_BB6.fastq.gz   | D614G   | 99.917 | 1212.0 | 1624.9975490196100 | 3.37 | NAS | 7.0 | 2 | 700 | 05NOV2020 10:15 | LY3819253 700mg IV           |
| 10171007 | 11816858240 | 126_11816858240_323348w_ND8.fastq.gz  | D614G   | 99.953 | 2118.0 | 3521.080487804880  | 2.25 | NPH | 7.0 | 2 | 700 | 19NOV2020 09:38 | LY3819253 700mg IV           |
| 10891005 | 11835748811 | 116_11835748811_323348w_ND3.fastq.gz  | D614G   | 100.0  | 1168.0 | 2124.372596153850  | 2.33 | NPH | 7.0 | 2 | 700 | 20NOV2020 14:34 | Placebo for LY3819253 700 mg |
| 10891005 | 11835748811 | 116_11835748811_323348w_ND3.fastq.gz  | K814M   | 100.0  | 1.0    | 2124.372596153850  | 2.33 | NPH | 7.0 | 2 | 700 | 20NOV2020 14:34 | Placebo for LY3819253 700 mg |
| 10031028 | 11841962433 | 241_11841962433_323348w_NF12.fastq.gz | D614G   | 99.828 | 3487.0 | 5556.408653846150  | 3.83 | NPH | 7.0 | 2 | 700 | 20NOV2020 11:01 | LY3819253 700mg IV           |
| 10031024 | 11841960128 | B10_11841960128_324017w_AG10.fastq.gz | R21I    | 99.818 | 2750.0 | 1568.3169533169500 | 2.58 | NPH | 7.0 | 2 | 700 | 18NOV2020 11:45 | Placebo for LY3819253 700 mg |
| 10031024 | 11841960128 | B10_11841960128_324017w_AG10.fastq.gz | D614G   | 99.626 | 1070.0 | 1568.3169533169500 | 2.58 | NPH | 7.0 | 2 | 700 | 18NOV2020 11:45 | Placebo for LY3819253 700 mg |
| 10031024 | 11841960128 | B10_11841960128_324017w_AG10.fastq.gz | F718I   | 21.294 | 1113.0 | 1568.3169533169500 | 2.58 | NPH | 7.0 | 2 | 700 | 18NOV2020 11:45 | Placebo for LY3819253 700 mg |
| 10291007 | 11833631808 | B1_11833631808_324017w_AG1.fastq.gz   | D614G   | 99.924 | 2639.0 | 2273.1948529411800 | 2.08 | NPH | 7.0 | 2 | 700 | 13NOV2020 09:33 | LY3819253 700mg IV           |
| 10181010 | 11816796545 | C4_11816796545_324017w_AH4.fastq.gz   | S255F   | 100.0  | 597.0  | 1079.3022974607000 | 3.01 | NPH | 7.0 | 2 | 700 | 19NOV2020 07:56 | LY3819253 700mg IV           |
| 10181010 | 11816796545 | C4_11816796545_324017w_AH4.fastq.gz   | D614G   | 99.833 | 598.0  | 1079.3022974607000 | 3.01 | NPH | 7.0 | 2 | 700 | 19NOV2020 07:56 | LY3819253 700mg IV           |
| 10181010 | 11816796545 | C4_11816796545_324017w_AH4.fastq.gz   | P681H   | 99.786 | 468.0  | 1079.3022974607000 | 3.01 | NPH | 7.0 | 2 | 700 | 19NOV2020 07:56 | LY3819253 700mg IV           |
| 10251006 | 11820979471 | A1_11820979471_324017w_AF1.fastq.gz   | D614G   | 99.943 | 1744.0 | 3468.9791666666700 | 2.69 | NPH | 7.0 | 2 | 700 | 23OCT2020 08:42 | Placebo for LY3819253 700 mg |
| 10411002 | 11835728716 | B8_11835728716_324017w_AG8.fastq.gz   | F32L    | 99.734 | 3010.0 | 1899.0638820638800 | 2.18 | NPH | 7.0 | 2 | 700 | 16NOV2020 14:15 | LY3819253 700mg IV           |
|          |             |                                       |         |        |        |                    |      |     |     |   |     |                 |                              |

|          |             |                                       |         |        |        |                    |      |     |     |   |     |                 |                              |
|----------|-------------|---------------------------------------|---------|--------|--------|--------------------|------|-----|-----|---|-----|-----------------|------------------------------|
| 10951003 | 11844040640 | G2_11844040640_323524w_BG2.fastq.gz   | D614G   | 100.0  | 1061.0 | 1287.2441717791400 | 2.07 | NPH | 7.0 | 2 | 700 | 19NOV2020 08:45 | Placebo for LY3819253 700 mg |
| 10951003 | 11844040640 | G2_11844040640_323524w_BG2.fastq.gz   | K814N   | 100.0  | 1.0    | 1287.2441717791400 | 2.07 | NPH | 7.0 | 2 | 700 | 19NOV2020 08:45 | Placebo for LY3819253 700 mg |
| 10161004 | 11806297093 | G9_11806297093_323524w_BG9.fastq.gz   | T547I   | 100.0  | 949.0  | 1064.7785977859800 | 3.42 | NPH | 7.0 | 2 | 700 | 22OCT2020 11:57 | LY3819253 700mg IV           |
| 10161004 | 11806297093 | G9_11806297093_323524w_BG9.fastq.gz   | D614G   | 100.0  | 838.0  | 1064.7785977859800 | 3.42 | NPH | 7.0 | 2 | 700 | 22OCT2020 11:57 | LY3819253 700mg IV           |
| 10161004 | 11806297093 | G9_11806297093_323524w_BG9.fastq.gz   | A684S   | 41.21  | 529.0  | 1064.7785977859800 | 3.42 | NPH | 7.0 | 2 | 700 | 22OCT2020 11:57 | LY3819253 700mg IV           |
| 10051006 | 11835723334 | B12_11835723334_323524w_BB12.fastq.gz | D614G   | 100.0  | 579.0  | 816.2751842751840  | 2.43 | NPH | 7.0 | 2 | 700 | 05NOV2020 09:49 | LY3819253 700mg IV           |
| 10051006 | 11835723334 | B12_11835723334_323524w_BB12.fastq.gz | A783V   | 52.431 | 1049.0 | 816.2751842751840  | 2.43 | NPH | 7.0 | 2 | 700 | 05NOV2020 09:49 | LY3819253 700mg IV           |
| 10421011 | 11852449483 | F10_11852449483_323524w_BF10.fastq.gz | G601R   | 22.712 | 1158.0 | 1470.3504273504300 | 4.64 | NPH | 7.0 | 2 | 700 | 05NOV2020 13:34 | Placebo for LY3819253 700 mg |
| 10421011 | 11852449483 | F10_11852449483_323524w_BF10.fastq.gz | D614G   | 100.0  | 1137.0 | 1470.3504273504300 | 4.64 | NPH | 7.0 | 2 | 700 | 05NOV2020 13:34 | Placebo for LY3819253 700 mg |
| 10201011 | 11818967109 | B6_11818967109_323524w_BB6.fastq.gz   | D614G   | 100.0  | 152.0  | 879.3844282238440  | 3.8  | NPH | 7.0 | 2 | 700 | 03NOV2020 08:23 | Placebo for LY3819253 700 mg |
| 10201011 | 11818967109 | B6_11818967109_323524w_BB6.fastq.gz   | K814N   | 100.0  | 2.0    | 879.3844282238440  | 3.8  | NPH | 7.0 | 2 | 700 | 03NOV2020 08:23 | Placebo for LY3819253 700 mg |
| 10201007 | 11850403331 | A4_11850403331_323524w_BA4.fastq.gz   | D614G   | 99.894 | 944.0  | 1282.7660606060600 | 4.24 | NPH | 7.0 | 2 | 700 | 22OCT2020 08:42 | LY3819253 700mg IV           |
| 10201007 | 11850403331 | A4_11850403331_323524w_BA4.fastq.gz   | P681R   | 99.862 | 727.0  | 1282.7660606060600 | 4.24 | NPH | 7.0 | 2 | 700 | 22OCT2020 08:42 | LY3819253 700mg IV           |
| 10561003 | 11839942474 | 40_11839942474_323232w_AD4.fastq.gz   | D614G   | 99.925 | 2664.0 | 3110.9951865222600 | 3.45 | NPH | 7.0 | 2 | 700 | 02NOV2020 10:38 | Placebo for LY3819253 700 mg |
| 10561004 | 11839943233 | 42_11839943233_323232w_AD6.fastq.gz   | D614G   | 99.795 | 1462.0 | 1816.032967032970  | 4.14 | NPH | 7.0 | 2 | 700 | 02NOV2020 10:10 | Placebo for LY3819253 700 mg |
| 10021007 | 11833556803 | 78_11833556803_323232w_AG6.fastq.gz   | D614G   | 99.865 | 1483.0 | 1782.5361963190200 | 2.95 | NPH | 7.0 | 2 | 700 | 10NOV2020 11:17 | LY3819253 700mg IV           |
| 10891006 | 11848253577 | 28_11848253577_323232w_AC4.fastq.gz   | A222V   | 99.904 | 2080.0 | 2047.2463235294100 | 3.49 | NPH | 7.0 | 2 | 700 | 23NOV2020 10:33 | LY3819253 700mg IV           |
| 10891006 | 11848253577 | 28_11848253577_323232w_AC4.fastq.gz   | D614G   | 99.942 | 1710.0 | 2047.2463235294100 | 3.49 | NPH | 7.0 | 2 | 700 | 23NOV2020 10:33 | LY3819253 700mg IV           |
| 10011023 | 11821065478 | 38_11821065478_323232w_AD2.fastq.gz   | D614G   | 99.877 | 1631.0 | 1846.4966517857100 | 6.43 | NAS | 7.0 | 2 | 700 | 20NOV2020 13:32 | Placebo for LY3819253 700 mg |
| 10421009 | 11804219206 | 85_11804219206_323232w_AH1.fastq.gz   | D614G   | 99.891 | 2751.0 | 3566.5982905982900 | 4.97 | NPH | 7.0 | 2 | 700 | 27OCT2020 09:43 | Placebo for LY3819253 700 mg |
| 10421007 | 11821067022 | 84_11821067022_323232w_AG12.fastq.gz  | D614G   | 99.736 | 1515.0 | 1811.7155067155100 | 3.61 | NPH | 7.0 | 2 | 700 | 20OCT2020 10:08 | Placebo for LY3819253 700 mg |
| 10371001 | 11833647370 | 90_11833647370_323232w_AH6.fastq.gz   | D614G   | 99.85  | 2669.0 | 3242.0724815724800 | 2.86 | NPH | 7.0 | 2 | 700 | 05NOV2020 12:45 | LY3819253 700mg IV           |
| 10491001 | 11852524815 | 88_11852524815_323232w_AH4.fastq.gz   | D614G   | 99.903 | 3105.0 | 3729.4685646500600 | 5.78 | NPH | 7.0 | 2 | 700 | 04NOV2020 10:26 | Placebo for LY3819253 700 mg |
| 10491001 | 11852524815 | 88_11852524815_323232w_AH4.fastq.gz   | Y674F   | 99.874 | 2385.0 | 3729.4685646500600 | 5.78 | NPH | 7.0 | 2 | 700 | 04NOV2020 10:26 | Placebo for LY3819253 700 mg |
| 10311014 | 11841957060 | 62_11841957060_323232w_AF2.fastq.gz   | D614G   | 100.0  | 2847.0 | 3310.548780487810  | 2.74 | NPH | 7.0 | 2 | 700 | 25NOV2020 07:23 | LY3819253 700 mg             |
| 10311014 | 11841957060 | 62_11841957060_323232w_AF2.fastq.gz   | N679H   | 32.029 | 2198.0 | 3310.548780487810  | 2.74 | NPH | 7.0 | 2 | 700 | 25NOV2020 07:23 | Placebo for LY3819253 700 mg |
| 10291002 | 11833630786 | 87_11833630786_323232w_AH3.fastq.gz   | D614G   | 99.742 | 1553.0 | 2005.612745098040  | 3.81 | NPH | 7.0 | 2 | 700 | 03NOV2020 10:08 | LY3819253 700mg IV           |
| 10051009 | 11854552069 | 33_11854552069_323232w_AC9.fastq.gz   | D614G   | 99.815 | 3778.0 | 4610.054479418890  | 3.28 | NPH | 7.0 | 2 | 700 | 19NOV2020 10:10 | LY3819253 700mg IV           |
| 10421014 | 11852449737 | 3_11852449737_323232w_AA3.fastq.gz    | D614G   | 99.908 | 3277.0 | 3939.2998790810200 | 2.81 | NPH | 7.0 | 2 | 700 | 09NOV2020 12:13 | Placebo for LY3819253 700 mg |
| 10421015 | 11852451531 | 7_11852451531_323232w_AA7.fastq.gz    | D614G   | 99.933 | 2985.0 | 3889.8239608802000 | 3.36 | NPH | 7.0 | 2 | 700 | 10NOV2020 09:05 | Placebo for LY3819253 700 mg |
| 10891004 | 11835747523 | 117_11835747523_Repeat_323332w_NH11   | D614G   | 99.812 | 1062.0 | 1803.2261904761900 | 2.38 | NPH | 7.0 | 2 | 700 | 20NOV2020 08:33 | LY3819253 700mg IV           |
| 10661002 | 11833641860 | 13_11833641860_323230w_CE3.fastq.gz   | D614G   | 99.833 | 1195.0 | 1519.4507389162600 | 3.61 | NPH | 7.0 | 2 | 700 | 19NOV2020 14:19 | LY3819253 700mg IV           |
| 10031018 | 11823083593 | 24_83593_322851w_CB12.fastq.gz        | D614G   | 99.695 | 1312.0 | 1679.6765067650700 | 3.73 | NPH | 7.0 | 2 | 700 | 28OCT2020 10:38 | Placebo for LY3819253 700 mg |
| 10051003 | 11835659590 | 10_59590_322851w_CA10.fastq.gz        | D138H   | 99.789 | 949.0  | 1133.9975609756100 | 3.48 | NPH | 7.0 | 2 | 700 | 26OCT2020 09:56 | LY3819253 700mg IV           |
| 10051003 | 11835659590 | 10_59590_322851w_CA10.fastq.gz        | D614G   | 100.0  | 867.0  | 1133.9975609756100 | 3.48 | NPH | 7.0 | 2 | 700 | 26OCT2020 09:56 | LY3819253 700mg IV           |
| 10021003 | 11833621770 | 5_21770_322851w_CA5.fastq.gz          | D614G   | 99.882 | 1689.0 | 2170.8002436053600 | 3.3  | NPH | 7.0 | 2 | 700 | 21OCT2020 10:15 | Placebo for LY3819253 700 mg |
| 10021005 | 11833554507 | 46_54507_322851w_CD10.fastq.gz        | D614G   | 99.823 | 1129.0 | 1421.4017199017200 | 2.82 | NPH | 7.0 | 2 | 700 | 27OCT2020 12:24 | LY3819253 700mg IV           |
| 10081003 | 11837815107 | 30_15107_322851w_CC6.fastq.gz         | D614G   | 99.833 | 1199.0 | 1481.7650676506800 | 3.52 | NPH | 7.0 | 2 | 700 | 19OCT2020 13:16 | Placebo for LY3819253 700 mg |
| 10031015 | 11823083587 | 22_83587_322851w_CB10.fastq.gz        | D614G   | 100.0  | 750.0  | 1396.9174876847300 | 2.91 | NPH | 7.0 | 2 | 700 | 27OCT2020 14:23 | LY3819253 700mg IV           |
| 10051005 | 11835724620 | 84_24620_322847w_BG12.fastq.gz        | E484Q   | 87.741 | 1974.0 | 2109.1939759036100 | 2.92 | NPH | 7.0 | 2 | 700 | 05NOV2020 10:15 | LY3819253 700mg IV           |
| 10051005 | 11835724620 | 84_24620_322847w_BG12.fastq.gz        | D614G   | 99.941 | 1709.0 | 2109.1939759036100 | 2.92 | NPH | 7.0 | 2 | 700 | 05NOV2020 10:15 | LY3819253 700mg IV           |
| 10171006 | 11833638145 | 6_11833638145_323283w_CD5.fastq.gz    | S477N   | 27.435 | 955.0  | 1035.9154411764700 | 2.25 | NPH | 7.0 | 2 | 700 | 16NOV2020 11:18 | Placebo for LY3819253 700 mg |
| 10171006 | 11833638145 | 6_11833638145_323283w_CD5.fastq.gz    | D614G   | 99.877 | 816.0  | 1035.9154411764700 | 2.25 | NPH | 7.0 | 2 | 700 | 16NOV2020 11:18 | Placebo for LY3819253 700 mg |
| 10121007 | 11804195145 | 3_11804195145_323283w_CD2.fastq.gz    | S477N   | 70.854 | 820.0  | 841.5985312117500  | 3.29 | NPH | 7.0 | 2 | 700 | 09NOV2020 12:49 | Placebo for LY3819253 700 mg |
| 10121007 | 11804195145 | 3_11804195145_323283w_CD2.fastq.gz    | D614G   | 100.0  | 625.0  | 841.5985312117500  | 3.29 | NPH | 7.0 | 2 | 700 | 09NOV2020 12:49 | Placebo for LY3819253 700 mg |
| 10121007 | 11804195145 | 3_11804195145_323283w_CD2.fastq.gz    | T732A   | 25.813 | 461.0  | 841.5985312117500  | 3.29 | NPH | 7.0 | 2 | 700 | 09NOV2020 12:49 | Placebo for LY3819253 700 mg |
| 10081006 | 11837818186 | B2_11837818186_324019w_CB2.fastq.gz   | A520S   | 99.669 | 3023.0 | 2483.6153846153800 | 2.98 | NAS | 7.0 | 2 | 700 | 05NOV2020 07:57 | LY3819253 700mg IV           |
| 10081006 | 11837818186 | B2_11837818186_324019w_CB2.fastq.gz   | D614G   | 99.745 | 1569.0 | 2483.6153846153800 | 2.98 | NAS | 7.0 | 2 | 700 | 05NOV2020 07:57 | LY3819253 700mg IV           |
| 10081006 | 11837818186 | B2_11837818186_324019w_CB2.fastq.gz   | K814M   | 33.333 | 3.0    | 2483.6153846153800 | 2.98 | NAS | 7.0 | 2 | 700 | 05NOV2020 07:57 | LY3819253 700mg IV           |
| 10081006 | 11837818186 | B2_11837818186_324019w_CB2.fastq.gz   | K814N   | 33.333 | 3.0    | 2483.6153846153800 | 2.98 | NAS | 7.0 | 2 | 700 | 05NOV2020 07:57 | LY3819253 700mg IV           |
| 10081006 | 11837818186 | B2_11837818186_324019w_CB2.fastq.gz   | R815K   | 50.0   | 2.0    | 2483.6153846153800 | 2.98 | NAS | 7.0 | 2 | 700 | 05NOV2020 07:57 | LY3819253 700mg IV           |
| 10661001 | 11833643661 | D3_11833643661_324019w_CD3.fastq.gz   | D614G   | 99.882 | 849.0  | 1738.6842751842800 | 3.46 | NPH | 7.0 | 2 | 700 | 16NOV2020 14:15 | Placebo for LY3819253 700 mg |
| 10661001 | 11833643661 | D3_11833643661_324019w_CD3.fastq.gz   | S813I   | 100.0  | 1.0    | 1738.6842751842800 | 3.46 | NPH | 7.0 | 2 | 700 | 16NOV2020 14:15 | Placebo for LY3819253 700 mg |
| 10201008 | 11818965062 | G8_11818965062_324019w_CG8.fastq.gz   | E484K   | 100.0  | 5.0    | 3565.4875239923200 | 4.94 | NPH | 7.0 | 2 | 700 | 29OCT2020 09:53 | LY3819253 700mg IV           |
| 10171003 | 11833639944 | B8_11833639944_324019w_CB8.fastq.gz   | D614G   | 99.833 | 1201.0 | 2366.5525672371600 | 2.89 | NPH | 7.0 | 2 | 700 | 21OCT2020 10:15 | LY3819253 700mg IV           |
| 10171003 | 11833639944 | B8_11833639944_324019w_CB8.fastq.gz   | Q677R   | 99.672 | 916.0  | 2366.5525672371600 | 2.89 | NPH | 7.0 | 2 | 700 | 21OCT2020 10:15 | LY3819253 700mg IV           |
| 10061005 | 11804195140 | B4_11804195140_324019w_CB4.fastq.gz   | D614G   | 99.818 | 1098.0 | 1877.6145454545500 | 2.67 | NPH | 7.0 | 2 | 700 | 04NOV2020 15:44 | LY3819253 700mg IV           |
| 10311014 | 11841956550 | H1_11841956550_324019w_CH1.fastq.gz   | D614G   | 99.912 | 1141.0 | 1901.1800486618000 | 3.4  | NAS | 7.0 | 2 | 700 | 25NOV2020 07:20 | Placebo for LY3819253 700 mg |
| 10311014 | 11841956550 | H1_11841956550_324019w_CH1.fastq.gz   | G667del | 21.133 | 724.0  | 1901.1800486618000 | 3.4  | NAS | 7.0 | 2 | 700 | 25NOV2020 07:20 | Placebo for LY3819253 700 mg |
| 10311014 | 11841956550 | H1_11841956550_324019w_CH1.fastq.gz   | A668del | 22.078 | 693.0  | 1901.1800486618000 | 3.4  | NAS | 7.0 | 2 | 700 | 25NOV2020 07:20 | Placebo for LY3819253 700 mg |
| 10311014 | 11841956550 | H1_11841956550_324019w_CH1.fastq.gz   | G669del | 22.11  | 692.0  | 1901.1800486618000 | 3.4  | NAS | 7.0 | 2 | 700 | 25NOV2020 07:20 | Placebo for LY3819253 700 mg |
| 10311014 | 11841956550 | H1_11841956550_324019w_CH1.fastq.gz   | I670del | 23.112 | 662.0  | 1901.1800486618000 | 3.4  | NAS | 7.0 | 2 | 700 | 25NOV2020 07:20 | Placebo for LY3819253 700 mg |
| 10311014 | 11841956550 | H1_11841956550_324019w_CH1.fastq.gz   | C671del | 21.983 | 696.0  | 1901.1800486618000 | 3.4  | NAS | 7.0 | 2 | 700 | 25NOV2020 07:20 | Placebo for LY3819253 700 mg |
| 10311014 | 11841956550 | H1_11841956550_324019w_CH1.fastq.gz   | A672del | 22.061 | 689.0  | 1901.1800486618000 | 3.4  | NAS | 7.0 | 2 | 700 | 25NOV2020 07:20 | Placebo for LY3819253 700 mg |
| 10311014 | 1184195     |                                       |         |        |        |                    |      |     |     |   |     |                 |                              |

|          |             |                                       |       |        |         |                    |      |     |     |   |     |                 |                              |
|----------|-------------|---------------------------------------|-------|--------|---------|--------------------|------|-----|-----|---|-----|-----------------|------------------------------|
| 10051009 | 11820998223 | E2_11820998223_323692w_NE2.fastq.gz   | D614G | 99.722 | 2158.0  | 2700.1374233128800 | 2.05 | NAS | 7.0 | 2 | 700 | 19NOV2020 10:10 | LY3819253 700mg IV           |
| 10051009 | 11820998223 | E2_11820998223_323692w_NE2.fastq.gz   | K814N | 100.0  | 1.0     | 2700.1374233128800 | 2.05 | NAS | 7.0 | 2 | 700 | 19NOV2020 10:10 | LY3819253 700mg IV           |
| 10201011 | 11818966598 | A8_11818966598_323692w_NA8.fastq.gz   | D614G | 99.732 | 2238.0  | 3105.50488997555   | 2.99 | NAS | 7.0 | 2 | 700 | 03NOV2020 08:22 | Placebo for LY3819253 700 mg |
| 10201011 | 11818966598 | A8_11818966598_323692w_NA8.fastq.gz   | K814N | 100.0  | 1.0     | 3105.50488997555   | 2.99 | NAS | 7.0 | 2 | 700 | 03NOV2020 08:22 | Placebo for LY3819253 700 mg |
| 10121008 | 11804194624 | 27_11804194624_323231w_NC3.fastq.gz   | S477N | 99.863 | 1460.0  | 1426.5054811205800 | 3.59 | NPH | 7.0 | 2 | 700 | 13NOV2020 09:28 | LY3819253 700mg IV           |
| 10121008 | 11804194624 | 27_11804194624_323231w_NC3.fastq.gz   | D614G | 99.823 | 1132.0  | 1426.5054811205800 | 3.59 | NPH | 7.0 | 2 | 700 | 13NOV2020 09:28 | LY3819253 700mg IV           |
| 10311007 | 11818898190 | 6_11818898190_323231w_NA6.fastq.gz    | K41I  | 29.561 | 3579.0  | 1364.4544349939200 | 3.18 | NPH | 7.0 | 2 | 700 | 03NOV2020 12:01 | Placebo for LY3819253 700 mg |
| 10311007 | 11818898190 | 6_11818898190_323231w_NA6.fastq.gz    | F59L  | 25.769 | 2600.0  | 1364.4544349939200 | 3.18 | NPH | 7.0 | 2 | 700 | 03NOV2020 12:01 | Placebo for LY3819253 700 mg |
| 10311007 | 11818898190 | 6_11818898190_323231w_NA6.fastq.gz    | F377L | 28.172 | 1324.0  | 1364.4544349939200 | 3.18 | NPH | 7.0 | 2 | 700 | 03NOV2020 12:01 | Placebo for LY3819253 700 mg |
| 10311007 | 11818898190 | 6_11818898190_323231w_NA6.fastq.gz    | E583_ | 25.425 | 1058.0  | 1364.4544349939200 | 3.18 | NPH | 7.0 | 2 | 700 | 03NOV2020 12:01 | Placebo for LY3819253 700 mg |
| 10311007 | 11818898190 | 6_11818898190_323231w_NA6.fastq.gz    | D614G | 99.618 | 1047.0  | 1364.4544349939200 | 3.18 | NPH | 7.0 | 2 | 700 | 03NOV2020 12:01 | Placebo for LY3819253 700 mg |
| 10311007 | 11818898190 | 6_11818898190_323231w_NA6.fastq.gz    | P681H | 99.876 | 806.0   | 1364.4544349939200 | 3.18 | NPH | 7.0 | 2 | 700 | 03NOV2020 12:01 | Placebo for LY3819253 700 mg |
| 10311007 | 11818898190 | 6_11818898190_323231w_NA6.fastq.gz    | Q779_ | 26.813 | 455.0   | 1364.4544349939200 | 3.18 | NPH | 7.0 | 2 | 700 | 03NOV2020 12:01 | Placebo for LY3819253 700 mg |
| 10011021 | 11854554380 | 34_11854554380_323231w_NC10.fastq.gz  | D614G | 99.834 | 1809.0  | 2264.1365313653100 | 2.68 | NPH | 7.0 | 2 | 700 | 16NOV2020 09:26 | Placebo for LY3819253 700 mg |
| 10031022 | 11816853446 | 30_11816853446_323231w_NC6.fastq.gz   | D614G | 99.681 | 1253.0  | 1865.6658595641600 | 5.52 | NPH | 7.0 | 2 | 700 | 09NOV2020 10:58 | Placebo for LY3819253 700 mg |
| 10031022 | 11816853446 | 30_11816853446_323231w_NC6.fastq.gz   | Q675H | 99.819 | 1107.0  | 1865.6658595641600 | 5.52 | NPH | 7.0 | 2 | 700 | 09NOV2020 10:58 | Placebo for LY3819253 700 mg |
| 10131011 | 11850408453 | 79_11850408453_323231w_NG7.fastq.gz   | T274I | 29.595 | 1061.0  | 1114.1573426573400 | 4.44 | NAS | 7.0 | 2 | 700 | 17NOV2020 09:58 | Placebo for LY3819253 700 mg |
| 10131011 | 11850408453 | 79_11850408453_323231w_NG7.fastq.gz   | D614G | 99.873 | 790.0   | 1114.1573426573400 | 4.44 | NAS | 7.0 | 2 | 700 | 17NOV2020 09:58 | Placebo for LY3819253 700 mg |
| 10131007 | 11850408967 | 58_11850408967_323231w_NE10.fastq.gz  | C15F  | 99.847 | 7177.0  | 3045.848894348890  | 2.25 | NPH | 7.0 | 2 | 700 | 30OCT2020 10:17 | Placebo for LY3819253 700 mg |
| 10131007 | 11850408967 | 58_11850408967_323231w_NE10.fastq.gz  | D614G | 100.0  | 2258.0  | 3045.848894348890  | 2.25 | NPH | 7.0 | 2 | 700 | 30OCT2020 10:17 | Placebo for LY3819253 700 mg |
| 10061007 | 11804262212 | 89_11804262212_323231w_NH5.fastq.gz   | D614G | 99.792 | 1439.0  | 1840.2253694581300 | 5.09 | NPH | 7.0 | 2 | 700 | 18NOV2020 13:23 | Placebo for LY3819253 700 mg |
| 10201019 | 11812673870 | 43_11812673870_323231w_ND7.fastq.gz   | D614G | 99.802 | 1011.0  | 1406.3644171779100 | 3.18 | NPH | 7.0 | 2 | 700 | 12NOV2020 11:02 | LY3819253 700mg IV           |
| 10221007 | 11839868934 | 32_11839868934_323231w_NC8.fastq.gz   | S13I  | 99.873 | 3934.0  | 1114.040243902440  | 2.28 | NPH | 7.0 | 2 | 700 | 03NOV2020 08:38 | Placebo for LY3819253 700 mg |
| 10221007 | 11839868934 | 32_11839868934_323231w_NC8.fastq.gz   | W152C | 99.678 | 933.0   | 1114.040243902440  | 2.28 | NPH | 7.0 | 2 | 700 | 03NOV2020 08:38 | Placebo for LY3819253 700 mg |
| 10221007 | 11839868934 | 32_11839868934_323231w_NC8.fastq.gz   | L452R | 99.909 | 1102.0  | 1114.040243902440  | 2.28 | NPH | 7.0 | 2 | 700 | 03NOV2020 08:38 | Placebo for LY3819253 700 mg |
| 10221007 | 11839868934 | 32_11839868934_323231w_NC8.fastq.gz   | D614G | 99.875 | 803.0   | 1114.040243902440  | 2.28 | NPH | 7.0 | 2 | 700 | 03NOV2020 08:38 | Placebo for LY3819253 700 mg |
| 10221007 | 11839868934 | 32_11839868934_323231w_NC8.fastq.gz   | A771D | 100.0  | 350.0   | 1114.040243902440  | 2.28 | NPH | 7.0 | 2 | 700 | 03NOV2020 08:38 | Placebo for LY3819253 700 mg |
| 10221006 | 11839866636 | 31_11839866636_323231w_NC7.fastq.gz   | S13I  | 99.92  | 10000.0 | 3721.189024390240  | 3.21 | NPH | 7.0 | 2 | 700 | 03NOV2020 08:52 | LY3819253 700mg IV           |
| 10221006 | 11839866636 | 31_11839866636_323231w_NC7.fastq.gz   | W152C | 99.918 | 3642.0  | 3721.189024390240  | 3.21 | NPH | 7.0 | 2 | 700 | 03NOV2020 08:52 | LY3819253 700mg IV           |
| 10221006 | 11839866636 | 31_11839866636_323231w_NC7.fastq.gz   | L452R | 99.892 | 3698.0  | 3721.189024390240  | 3.21 | NPH | 7.0 | 2 | 700 | 03NOV2020 08:52 | LY3819253 700mg IV           |
| 10221006 | 11839866636 | 31_11839866636_323231w_NC7.fastq.gz   | S494L | 29.672 | 3532.0  | 3721.189024390240  | 3.21 | NPH | 7.0 | 2 | 700 | 03NOV2020 08:52 | LY3819253 700mg IV           |
| 10221006 | 11839866636 | 31_11839866636_323231w_NC7.fastq.gz   | D614G | 99.866 | 2991.0  | 3721.189024390240  | 3.21 | NPH | 7.0 | 2 | 700 | 03NOV2020 08:52 | LY3819253 700mg IV           |
| 10061009 | 11804198222 | 87_11804198222_323231w_NH3.fastq.gz   | D614G | 99.853 | 2729.0  | 3595.6908866995100 | 2.49 | NPH | 7.0 | 2 | 700 | 18NOV2020 15:46 | Placebo for LY3819253 700 mg |
| 10331006 | 11816864201 | 37_11816864201_323231w_ND1.fastq.gz   | D614G | 100.0  | 1238.0  | 1528.8815628815600 | 2.09 | NPH | 7.0 | 2 | 700 | 12NOV2020 15:43 | LY3819253 700mg IV           |
| 10331006 | 11816864201 | 37_11816864201_323231w_ND1.fastq.gz   | K814N | 100.0  | 1.0     | 1528.8815628815600 | 2.09 | NPH | 7.0 | 2 | 700 | 12NOV2020 15:43 | LY3819253 700mg IV           |
| 10201013 | 11850403329 | 15_11850403329_323231w_NB3.fastq.gz   | D614G | 99.868 | 760.0   | 1008.0822085889600 | 2.96 | NPH | 7.0 | 2 | 700 | 05NOV2020 11:32 | LY3819253 700mg IV           |
| 10081006 | 11837818185 | 49_11837818185_323231w_NE1.fastq.gz   | A520S | 99.85  | 1335.0  | 1470.0722154222800 | 2.75 | NPH | 7.0 | 2 | 700 | 05NOV2020 07:57 | LY3819253 700mg IV           |
| 10081006 | 11837818185 | 49_11837818185_323231w_NE1.fastq.gz   | D614G | 100.0  | 1114.0  | 1470.0722154222800 | 2.75 | NPH | 7.0 | 2 | 700 | 05NOV2020 07:57 | LY3819253 700mg IV           |
| 10201018 | 11846161924 | 39_11846161924_323231w_ND3.fastq.gz   | L5F   | 99.917 | 3626.0  | 1507.5253012048200 | 4.35 | NPH | 7.0 | 2 | 700 | 13NOV2020 09:52 | LY3819253 700mg IV           |
| 10201018 | 11846161924 | 39_11846161924_323231w_ND3.fastq.gz   | D614G | 99.917 | 1206.0  | 1507.5253012048200 | 4.35 | NPH | 7.0 | 2 | 700 | 13NOV2020 09:52 | LY3819253 700mg IV           |
| 10311008 | 11816842887 | 9_11816842887_323231w_NA9.fastq.gz    | D614G | 99.93  | 2842.0  | 3370.820293398530  | 3.08 | NPH | 7.0 | 2 | 700 | 05NOV2020 12:26 | Placebo for LY3819253 700 mg |
| 10041003 | 11802102276 | 20_11802102276_323231w_NB8.fastq.gz   | D614G | 100.0  | 691.0   | 1065.719557195570  | 2.27 | NPH | 7.0 | 2 | 700 | 04NOV2020 14:22 | LY3819253 700mg IV           |
| 10011022 | 11820983051 | 35_11820983051_323231w_NC11.fastq.gz  | G75R  | 52.01  | 1990.0  | 1412.490171990170  | 2.47 | NPH | 7.0 | 2 | 700 | 16NOV2020 10:25 | Placebo for LY3819253 700 mg |
| 10011022 | 11820983051 | 35_11820983051_323231w_NC11.fastq.gz  | D614G | 99.573 | 936.0   | 1412.490171990170  | 2.47 | NPH | 7.0 | 2 | 700 | 16NOV2020 10:25 | Placebo for LY3819253 700 mg |
| 10011025 | 11816859846 | 85_11816859846_323231w_NH1.fastq.gz   | D614G | 99.836 | 1825.0  | 2433.69864698647   | 2.66 | NPH | 7.0 | 2 | 700 | 23NOV2020 08:39 | Placebo for LY3819253 700 mg |
| 10011025 | 11816859846 | 85_11816859846_323231w_NH1.fastq.gz   | I670M | 49.705 | 1527.0  | 2433.69864698647   | 2.66 | NPH | 7.0 | 2 | 700 | 23NOV2020 08:39 | Placebo for LY3819253 700 mg |
| 10041005 | 11835718983 | 21_11835718983_323231w_NB9.fastq.gz   | D614G | 99.751 | 1207.0  | 1657.344701583440  | 3.41 | NPH | 7.0 | 2 | 700 | 06NOV2020 11:30 | Placebo for LY3819253 700 mg |
| 10441002 | 11854609667 | 14_11854609667_tINTD_S1_S1S2_t_323691 | T20I  | 99.916 | 7175.0  | 3425.4920634920600 | 2.16 | NPH | 7.0 | 2 | 700 | 19NOV2020 10:22 | LY3819253 700mg IV           |
| 10441002 | 11854609667 | 14_11854609667_tINTD_S1_S1S2_t_323691 | D614G | 99.83  | 2356.0  | 3425.4920634920600 | 2.16 | NPH | 7.0 | 2 | 700 | 19NOV2020 10:22 | LY3819253 700mg IV           |
| 10441002 | 11854609667 | 14_11854609667_tINTD_S1_S1S2_t_323691 | A626V | 99.885 | 3493.0  | 3425.4920634920600 | 2.16 | NPH | 7.0 | 2 | 700 | 19NOV2020 10:22 | LY3819253 700mg IV           |
| 10441002 | 11854609667 | 14_11854609667_tINTD_S1_S1S2_t_323691 | A701V | 36.014 | 2574.0  | 3425.4920634920600 | 2.16 | NPH | 7.0 | 2 | 700 | 19NOV2020 10:22 | LY3819253 700mg IV           |
| 10441002 | 11854609667 | 14_11854609667_tINTD_S1_S1S2_t_323691 | K814N | 100.0  | 1.0     | 3425.4920634920600 | 2.16 | NPH | 7.0 | 2 | 700 | 19NOV2020 10:22 | LY3819253 700mg IV           |
| 10131010 | 11810554827 | 1_11810554827_323523w_AE11.fastq.gz   | D111N | 99.945 | 1828.0  | 1944.39608801956   | 2.96 | NAS | 7.0 | 2 | 700 | 16NOV2020 12:32 | Placebo for LY3819253 700 mg |
| 10131010 | 11810554827 | 1_11810554827_323523w_AE11.fastq.gz   | D614G | 99.868 | 1520.0  | 1944.39608801956   | 2.96 | NAS | 7.0 | 2 | 700 | 16NOV2020 12:32 | Placebo for LY3819253 700 mg |
| 10131010 | 11810554827 | 1_11810554827_323523w_AE11.fastq.gz   | T732A | 99.896 | 957.0   | 1944.39608801956   | 2.96 | NAS | 7.0 | 2 | 700 | 16NOV2020 12:32 | Placebo for LY3819253 700 mg |
| 10131010 | 11810554827 | 1_11810554827_323523w_AE11.fastq.gz   | K814M | 50.0   | 2.0     | 1944.39608801956   | 2.96 | NAS | 7.0 | 2 | 700 | 16NOV2020 12:32 | Placebo for LY3819253 700 mg |
| 10131010 | 11810554827 | 1_11810554827_323523w_AE11.fastq.gz   | K814N | 50.0   | 2.0     | 1944.39608801956   | 2.96 | NAS | 7.0 | 2 | 700 | 16NOV2020 12:32 | Placebo for LY3819253 700 mg |
| 10131010 | 11810554827 | 1_11810554827_323523w_AE11.fastq.gz   | R815G | 50.0   | 2.0     | 1944.39608801956   | 2.96 | NAS | 7.0 | 2 | 700 | 16NOV2020 12:32 | Placebo for LY3819253 700 mg |
| 10111004 | 11837821444 | B12_11837821444_324020w_NB12.fastq.gz | P9L   | 1.082  | 4066.0  | 1938.3682310469300 | 3.61 | NPH | 7.0 | 2 | 700 | 24NOV2020 11:02 | Placebo for LY3819253 700 mg |
| 10111004 | 11837821444 | B12_11837821444_324020w_NB12.fastq.gz | S71F  | 1.214  | 412.0   | 1938.3682310469300 | 3.61 | NPH | 7.0 | 2 | 700 | 24NOV2020 11:02 | Placebo for LY3819253 700 mg |
| 10111004 | 11837821444 | B12_11837821444_324020w_NB12.fastq.gz | F79V  | 3.403  | 382.0   | 1938.3682310469300 | 3.61 | NPH | 7.0 | 2 | 700 | 24NOV2020 11:02 | Placebo for LY3819253 700 mg |
| 10111004 | 11837821444 | B12_11837821444_324020w_NB12.fastq.gz | L118F | 4.58   | 262.0   | 1938.3682310469300 | 3.61 | NPH | 7.0 | 2 | 700 | 24NOV2020 11:02 | Placebo for LY3819253 700 mg |
| 10111004 | 11837821444 | B12_11837821444_324020w_NB12.fastq.gz | A243V | 1.837  | 381.0   | 1938.3682310469300 | 3.61 | NPH | 7.0 | 2 | 700 | 24NOV2020 11:02 | Placebo for LY3819253 700 mg |
| 10111004 | 11837821444 | B12_11837821444_324020w_NB12.fastq.gz | W258L | 2.051  | 390.0   | 1938.3682310469300 |      |     |     |   |     |                 |                              |

|          |             |                                       |         |        |        |                    |      |     |     |   |     |                 |                              |
|----------|-------------|---------------------------------------|---------|--------|--------|--------------------|------|-----|-----|---|-----|-----------------|------------------------------|
| 10121011 | 11823097735 | F7_11823097735_324020w_NF7.fastq.gz   | Q784K   | 5.919  | 1284.0 | 3002.4549878345500 | 3.07 | NPH | 7.0 | 2 | 700 | 24NOV2020 09:32 | Placebo for LY3819253 700 mg |
| 10121011 | 11823097735 | F7_11823097735_324020w_NF7.fastq.gz   | K786R   | 2.747  | 1347.0 | 3002.4549878345500 | 3.07 | NPH | 7.0 | 2 | 700 | 24NOV2020 09:32 | Placebo for LY3819253 700 mg |
| 10291009 | 11833629256 | D1_11833629256_324020w_ND1.fastq.gz   | L5F     | 1.497  | 4143.0 | 2253.9428223844300 | 4.11 | NPH | 7.0 | 2 | 700 | 19NOV2020 10:13 | Placebo for LY3819253 700 mg |
| 10291009 | 11833629256 | D1_11833629256_324020w_ND1.fastq.gz   | Q762_   | 1.153  | 607.0  | 2253.9428223844300 | 4.11 | NPH | 7.0 | 2 | 700 | 19NOV2020 10:13 | Placebo for LY3819253 700 mg |
| 10291009 | 11833629256 | D1_11833629256_324020w_ND1.fastq.gz   | R765C   | 1.416  | 565.0  | 2253.9428223844300 | 4.11 | NPH | 7.0 | 2 | 700 | 19NOV2020 10:13 | Placebo for LY3819253 700 mg |
| 10291009 | 11833629256 | D1_11833629256_324020w_ND1.fastq.gz   | K786R   | 1.46   | 959.0  | 2253.9428223844300 | 4.11 | NPH | 7.0 | 2 | 700 | 19NOV2020 10:13 | Placebo for LY3819253 700 mg |
| 10241004 | 11837829696 | H2_11837829696_324020w_NH2.fastq.gz   | S31F    | 10.43  | 1908.0 | 1875.2719614921800 | 3.02 | NPH | 7.0 | 2 | 700 | 27OCT2020 12:22 | Placebo for LY3819253 700 mg |
| 10241004 | 11837829696 | H2_11837829696_324020w_NH2.fastq.gz   | S94F    | 10.443 | 632.0  | 1875.2719614921800 | 3.02 | NPH | 7.0 | 2 | 700 | 27OCT2020 12:22 | Placebo for LY3819253 700 mg |
| 10241004 | 11837829696 | H2_11837829696_324020w_NH2.fastq.gz   | E156G   | 11.635 | 636.0  | 1875.2719614921800 | 3.02 | NPH | 7.0 | 2 | 700 | 27OCT2020 12:22 | Placebo for LY3819253 700 mg |
| 10241004 | 11837829696 | H2_11837829696_324020w_NH2.fastq.gz   | F157L   | 10.285 | 632.0  | 1875.2719614921800 | 3.02 | NPH | 7.0 | 2 | 700 | 27OCT2020 12:22 | Placebo for LY3819253 700 mg |
| 10241004 | 11837829696 | H2_11837829696_324020w_NH2.fastq.gz   | L270F   | 2.698  | 556.0  | 1875.2719614921800 | 3.02 | NPH | 7.0 | 2 | 700 | 27OCT2020 12:22 | Placebo for LY3819253 700 mg |
| 10241004 | 11837829696 | H2_11837829696_324020w_NH2.fastq.gz   | F562del | 1.395  | 1792.0 | 1875.2719614921800 | 3.02 | NPH | 7.0 | 2 | 700 | 27OCT2020 12:22 | Placebo for LY3819253 700 mg |
| 10241004 | 11837829696 | H2_11837829696_324020w_NH2.fastq.gz   | Q563del | 1.402  | 1783.0 | 1875.2719614921800 | 3.02 | NPH | 7.0 | 2 | 700 | 27OCT2020 12:22 | Placebo for LY3819253 700 mg |
| 10241004 | 11837829696 | H2_11837829696_324020w_NH2.fastq.gz   | Q564del | 1.444  | 1731.0 | 1875.2719614921800 | 3.02 | NPH | 7.0 | 2 | 700 | 27OCT2020 12:22 | Placebo for LY3819253 700 mg |
| 10241004 | 11837829696 | H2_11837829696_324020w_NH2.fastq.gz   | T573I   | 3.382  | 2040.0 | 1875.2719614921800 | 3.02 | NPH | 7.0 | 2 | 700 | 27OCT2020 12:22 | Placebo for LY3819253 700 mg |
| 10241004 | 11837829696 | H2_11837829696_324020w_NH2.fastq.gz   | L629F   | 3.79   | 1715.0 | 1875.2719614921800 | 3.02 | NPH | 7.0 | 2 | 700 | 27OCT2020 12:22 | Placebo for LY3819253 700 mg |
| 10241004 | 11837829696 | H2_11837829696_324020w_NH2.fastq.gz   | Q644K   | 7.196  | 1598.0 | 1875.2719614921800 | 3.02 | NPH | 7.0 | 2 | 700 | 27OCT2020 12:22 | Placebo for LY3819253 700 mg |
| 10241004 | 11837829696 | H2_11837829696_324020w_NH2.fastq.gz   | T719I   | 3.033  | 1154.0 | 1875.2719614921800 | 3.02 | NPH | 7.0 | 2 | 700 | 27OCT2020 12:22 | Placebo for LY3819253 700 mg |
| 10241004 | 11837829696 | H2_11837829696_324020w_NH2.fastq.gz   | S735L   | 10.23  | 958.0  | 1875.2719614921800 | 3.02 | NPH | 7.0 | 2 | 700 | 27OCT2020 12:22 | Placebo for LY3819253 700 mg |
| 10241004 | 11837829696 | H2_11837829696_324020w_NH2.fastq.gz   | K786R   | 1.559  | 1026.0 | 1875.2719614921800 | 3.02 | NPH | 7.0 | 2 | 700 | 27OCT2020 12:22 | Placebo for LY3819253 700 mg |
| 10241004 | 11837829696 | H2_11837829696_324020w_NH2.fastq.gz   | F802C   | 10.054 | 925.0  | 1875.2719614921800 | 3.02 | NPH | 7.0 | 2 | 700 | 27OCT2020 12:22 | Placebo for LY3819253 700 mg |
| 10241004 | 11837829696 | H2_11837829696_324020w_NH2.fastq.gz   | P807L   | 3.0    | 900.0  | 1875.2719614921800 | 3.02 | NPH | 7.0 | 2 | 700 | 27OCT2020 12:22 | Placebo for LY3819253 700 mg |
| 10511009 | 11800030471 | H3_11800030471_324020w_NH3.fastq.gz   | S116P   | 9.121  | 307.0  | 1658.737745098040  | 2.48 | NPH | 7.0 | 2 | 700 | 30OCT2020 10:39 | Placebo for LY3819253 700 mg |
| 10511009 | 11800030471 | H3_11800030471_324020w_NH3.fastq.gz   | K786R   | 1.306  | 919.0  | 1658.737745098040  | 2.48 | NPH | 7.0 | 2 | 700 | 30OCT2020 10:39 | Placebo for LY3819253 700 mg |
| 10561002 | 11839941187 | C5_11839941187_324020w_NC5.fastq.gz   | S12F    | 7.722  | 3406.0 | 1433.4459134615400 | 3.66 | NPH | 7.0 | 2 | 700 | 30OCT2020 14:08 | LY3819253 700mg IV           |
| 10561002 | 11839941187 | C5_11839941187_324020w_NC5.fastq.gz   | V42F    | 1.376  | 2688.0 | 1433.4459134615400 | 3.66 | NPH | 7.0 | 2 | 700 | 30OCT2020 14:08 | LY3819253 700mg IV           |
| 10561002 | 11839941187 | C5_11839941187_324020w_NC5.fastq.gz   | S71F    | 2.09   | 1244.0 | 1433.4459134615400 | 3.66 | NPH | 7.0 | 2 | 700 | 30OCT2020 14:08 | LY3819253 700mg IV           |
| 10561002 | 11839941187 | C5_11839941187_324020w_NC5.fastq.gz   | G142C   | 2.733  | 622.0  | 1433.4459134615400 | 3.66 | NPH | 7.0 | 2 | 700 | 30OCT2020 14:08 | LY3819253 700mg IV           |
| 10561002 | 11839941187 | C5_11839941187_324020w_NC5.fastq.gz   | M177I   | 2.294  | 654.0  | 1433.4459134615400 | 3.66 | NPH | 7.0 | 2 | 700 | 30OCT2020 14:08 | LY3819253 700mg IV           |
| 10561002 | 11839941187 | C5_11839941187_324020w_NC5.fastq.gz   | F318L   | 2.202  | 1181.0 | 1433.4459134615400 | 3.66 | NPH | 7.0 | 2 | 700 | 30OCT2020 14:08 | LY3819253 700mg IV           |
| 10561002 | 11839941187 | C5_11839941187_324020w_NC5.fastq.gz   | Y351H   | 2.139  | 1309.0 | 1433.4459134615400 | 3.66 | NPH | 7.0 | 2 | 700 | 30OCT2020 14:08 | LY3819253 700mg IV           |
| 10561002 | 11839941187 | C5_11839941187_324020w_NC5.fastq.gz   | C361F   | 1.914  | 1097.0 | 1433.4459134615400 | 3.66 | NPH | 7.0 | 2 | 700 | 30OCT2020 14:08 | LY3819253 700mg IV           |
| 10561002 | 11839941187 | C5_11839941187_324020w_NC5.fastq.gz   | S399L   | 1.271  | 2360.0 | 1433.4459134615400 | 3.66 | NPH | 7.0 | 2 | 700 | 30OCT2020 14:08 | LY3819253 700mg IV           |
| 10561002 | 11839941187 | C5_11839941187_324020w_NC5.fastq.gz   | A419V   | 1.571  | 7574.0 | 1433.4459134615400 | 3.66 | NPH | 7.0 | 2 | 700 | 30OCT2020 14:08 | LY3819253 700mg IV           |
| 10561002 | 11839941187 | C5_11839941187_324020w_NC5.fastq.gz   | L455F   | 2.418  | 1034.0 | 1433.4459134615400 | 3.66 | NPH | 7.0 | 2 | 700 | 30OCT2020 14:08 | LY3819253 700mg IV           |
| 10561002 | 11839941187 | C5_11839941187_324020w_NC5.fastq.gz   | S459T   | 2.435  | 1273.0 | 1433.4459134615400 | 3.66 | NPH | 7.0 | 2 | 700 | 30OCT2020 14:08 | LY3819253 700mg IV           |
| 10561002 | 11839941187 | C5_11839941187_324020w_NC5.fastq.gz   | P521L   | 2.72   | 1985.0 | 1433.4459134615400 | 3.66 | NPH | 7.0 | 2 | 700 | 30OCT2020 14:08 | LY3819253 700mg IV           |
| 10561002 | 11839941187 | C5_11839941187_324020w_NC5.fastq.gz   | S72I    | 2.951  | 1186.0 | 1433.4459134615400 | 3.66 | NPH | 7.0 | 2 | 700 | 30OCT2020 14:08 | LY3819253 700mg IV           |
| 10561002 | 11839941187 | C5_11839941187_324020w_NC5.fastq.gz   | A672S   | 1.662  | 662.0  | 1433.4459134615400 | 3.66 | NPH | 7.0 | 2 | 700 | 30OCT2020 14:08 | LY3819253 700mg IV           |
| 10561002 | 11839941187 | C5_11839941187_324020w_NC5.fastq.gz   | A688V   | 3.387  | 679.0  | 1433.4459134615400 | 3.66 | NPH | 7.0 | 2 | 700 | 30OCT2020 14:08 | LY3819253 700mg IV           |
| 10561002 | 11839941187 | C5_11839941187_324020w_NC5.fastq.gz   | K786del | 1.444  | 1039.0 | 1433.4459134615400 | 3.66 | NPH | 7.0 | 2 | 700 | 30OCT2020 14:08 | LY3819253 700mg IV           |
| 10561002 | 11839941187 | C5_11839941187_324020w_NC5.fastq.gz   | K786R   | 1.251  | 1039.0 | 1433.4459134615400 | 3.66 | NPH | 7.0 | 2 | 700 | 30OCT2020 14:08 | LY3819253 700mg IV           |
| 10421013 | 11852451528 | E12_11852451528_324020w_NE12.fastq.gz | G667del | 10.835 | 1126.0 | 2110.622411693060  | 2.34 | NPH | 7.0 | 2 | 700 | 10NOV2020 11:34 | Placebo for LY3819253 700 mg |
| 10421013 | 11852451528 | E12_11852451528_324020w_NE12.fastq.gz | A668del | 11.142 | 1095.0 | 2110.622411693060  | 2.34 | NPH | 7.0 | 2 | 700 | 10NOV2020 11:34 | Placebo for LY3819253 700 mg |
| 10421013 | 11852451528 | E12_11852451528_324020w_NE12.fastq.gz | G669del | 11.162 | 1093.0 | 2110.622411693060  | 2.34 | NPH | 7.0 | 2 | 700 | 10NOV2020 11:34 | Placebo for LY3819253 700 mg |
| 10421013 | 11852451528 | E12_11852451528_324020w_NE12.fastq.gz | I670del | 11.142 | 1095.0 | 2110.622411693060  | 2.34 | NPH | 7.0 | 2 | 700 | 10NOV2020 11:34 | Placebo for LY3819253 700 mg |
| 10421013 | 11852451528 | E12_11852451528_324020w_NE12.fastq.gz | C671del | 10.636 | 1147.0 | 2110.622411693060  | 2.34 | NPH | 7.0 | 2 | 700 | 10NOV2020 11:34 | Placebo for LY3819253 700 mg |
| 10421013 | 11852451528 | E12_11852451528_324020w_NE12.fastq.gz | A672del | 10.674 | 1143.0 | 2110.622411693060  | 2.34 | NPH | 7.0 | 2 | 700 | 10NOV2020 11:34 | Placebo for LY3819253 700 mg |
| 10261031 | 11848332108 | D3_11848332108_324020w_ND3.fastq.gz   | T376A   | 1.395  | 1290.0 | 2272.9853658536600 | 2.61 | NPH | 7.0 | 2 | 700 | 19NOV2020 12:07 | Placebo for LY3819253 700 mg |
| 10261031 | 11848332108 | D3_11848332108_324020w_ND3.fastq.gz   | K786R   | 1.362  | 1175.0 | 2272.9853658536600 | 2.61 | NPH | 7.0 | 2 | 700 | 19NOV2020 12:07 | Placebo for LY3819253 700 mg |
| 10891007 | 11848251776 | D4_11848251776_324020w_ND4.fastq.gz   | F201L   | 8.784  | 1184.0 | 2450.310303030300  | 2.73 | NPH | 7.0 | 2 | 700 | 23NOV2020 08:31 | Placebo for LY3819253 700 mg |
| 10891007 | 11848251776 | D4_11848251776_324020w_ND4.fastq.gz   | L441P   | 17.307 | 8176.0 | 2450.310303030300  | 2.73 | NPH | 7.0 | 2 | 700 | 23NOV2020 08:31 | Placebo for LY3819253 700 mg |
| 10891007 | 11848251776 | D4_11848251776_324020w_ND4.fastq.gz   | P665del | 1.691  | 1183.0 | 2450.310303030300  | 2.73 | NPH | 7.0 | 2 | 700 | 23NOV2020 08:31 | Placebo for LY3819253 700 mg |
| 10891007 | 11848251776 | D4_11848251776_324020w_ND4.fastq.gz   | I666del | 1.765  | 1133.0 | 2450.310303030300  | 2.73 | NPH | 7.0 | 2 | 700 | 23NOV2020 08:31 | Placebo for LY3819253 700 mg |
| 10891007 | 11848251776 | D4_11848251776_324020w_ND4.fastq.gz   | G667del | 1.721  | 1162.0 | 2450.310303030300  | 2.73 | NPH | 7.0 | 2 | 700 | 23NOV2020 08:31 | Placebo for LY3819253 700 mg |
| 10891007 | 11848251776 | D4_11848251776_324020w_ND4.fastq.gz   | A668del | 1.765  | 1133.0 | 2450.310303030300  | 2.73 | NPH | 7.0 | 2 | 700 | 23NOV2020 08:31 | Placebo for LY3819253 700 mg |
| 10891007 | 11848251776 | D4_11848251776_324020w_ND4.fastq.gz   | G669del | 2.193  | 912.0  | 2450.310303030300  | 2.73 | NPH | 7.0 | 2 | 700 | 23NOV2020 08:31 | Placebo for LY3819253 700 mg |
| 10891007 | 11848251776 | D4_11848251776_324020w_ND4.fastq.gz   | I670del | 2.347  | 852.0  | 2450.310303030300  | 2.73 | NPH | 7.0 | 2 | 700 | 23NOV2020 08:31 | Placebo for LY3819253 700 mg |
| 10891007 | 11848251776 | D4_11848251776_324020w_ND4.fastq.gz   | C671del | 1.771  | 1129.0 | 2450.310303030300  | 2.73 | NPH | 7.0 | 2 | 700 | 23NOV2020 08:31 | Placebo for LY3819253 700 mg |
| 10891007 | 11848251776 | D4_11848251776_324020w_ND4.fastq.gz   | A672del | 1.757  | 1138.0 | 2450.310303030300  | 2.73 | NPH | 7.0 | 2 | 700 | 23NOV2020 08:31 | Placebo for LY3819253 700 mg |
| 10891007 | 11848251776 | D4_11848251776_324020w_ND4.fastq.gz   | S673del | 1.759  | 1137.0 | 2450.310303030300  | 2.73 | NPH | 7.0 | 2 | 700 | 23NOV2020 08:31 | Placebo for LY3819253 700 mg |
| 10891007 | 11848251776 | D4_11848251776_324020w_ND4.fastq.gz   | K786R   | 1.711  | 1169.0 | 2450.310303030300  | 2.73 | NPH | 7.0 | 2 | 700 | 23NOV2020 08:31 | Placebo for LY3819253 700 mg |
| 10151004 | 11800018945 | F3_11800018945_324020w_NF3.fastq.gz   | R454S   | 5.0    | 20.0   | 1439.9048780487800 | 2.26 | NPH | 7.0 | 2 | 700 | 19NOV2020 09:34 | Placebo for LY3819253 700 mg |
| 10151004 | 11800018945 | F3_11800018945_324020w_NF3.fastq.gz   | L455V   | 5.0    | 20.0   | 1439.9048780487800 | 2.26 | NPH | 7.0 | 2 | 700 | 19NOV2020       |                              |

|          |             |                                      |         |        |        |                    |      |     |     |   |     |                 |                              |
|----------|-------------|--------------------------------------|---------|--------|--------|--------------------|------|-----|-----|---|-----|-----------------|------------------------------|
| 10241005 | 11837827136 | 55_11837827136_323284w_NE7.fastq.gz  | G75V    | 6.658  | 811.0  | 574.9537149817300  | 2.98 | NPH | 7.0 | 2 | 700 | 20NOV2020 08:32 | Placebo for LY3819253 700 mg |
| 10241005 | 11837827136 | 55_11837827136_323284w_NE7.fastq.gz  | C336S   | 6.214  | 515.0  | 574.9537149817300  | 2.98 | NPH | 7.0 | 2 | 700 | 20NOV2020 08:32 | Placebo for LY3819253 700 mg |
| 10241005 | 11837827136 | 55_11837827136_323284w_NE7.fastq.gz  | P589Q   | 5.543  | 451.0  | 574.9537149817300  | 2.98 | NPH | 7.0 | 2 | 700 | 20NOV2020 08:32 | Placebo for LY3819253 700 mg |
| 10241005 | 11837827136 | 55_11837827136_323284w_NE7.fastq.gz  | Q690_   | 4.918  | 366.0  | 574.9537149817300  | 2.98 | NPH | 7.0 | 2 | 700 | 20NOV2020 08:32 | Placebo for LY3819253 700 mg |
| 10241005 | 11837827136 | 55_11837827136_323284w_NE7.fastq.gz  | P728L   | 2.482  | 282.0  | 574.9537149817300  | 2.98 | NPH | 7.0 | 2 | 700 | 20NOV2020 08:32 | Placebo for LY3819253 700 mg |
| 10241005 | 11837827136 | 55_11837827136_323284w_NE7.fastq.gz  | T747N   | 5.263  | 171.0  | 574.9537149817300  | 2.98 | NPH | 7.0 | 2 | 700 | 20NOV2020 08:32 | Placebo for LY3819253 700 mg |
| 10241005 | 11837827136 | 55_11837827136_323284w_NE7.fastq.gz  | Q762K   | 1.042  | 96.0   | 574.9537149817300  | 2.98 | NPH | 7.0 | 2 | 700 | 20NOV2020 08:32 | Placebo for LY3819253 700 mg |
| 10241005 | 11837827136 | 55_11837827136_323284w_NE7.fastq.gz  | N764S   | 1.111  | 90.0   | 574.9537149817300  | 2.98 | NPH | 7.0 | 2 | 700 | 20NOV2020 08:32 | Placebo for LY3819253 700 mg |
| 10241006 | 11800010247 | 56_11800010247_323284w_NE8.fastq.gz  | Q23_    | 6.612  | 1951.0 | 580.3766707168890  | 3.12 | NPH | 7.0 | 2 | 700 | 20NOV2020 09:17 | LY3819253 700mg IV           |
| 10241006 | 11800010247 | 56_11800010247_323284w_NE8.fastq.gz  | S112L   | 8.532  | 586.0  | 580.3766707168890  | 3.12 | NPH | 7.0 | 2 | 700 | 20NOV2020 09:17 | LY3819253 700mg IV           |
| 10241006 | 11800010247 | 56_11800010247_323284w_NE8.fastq.gz  | P230S   | 1.373  | 510.0  | 580.3766707168890  | 3.12 | NPH | 7.0 | 2 | 700 | 20NOV2020 09:17 | LY3819253 700mg IV           |
| 10241006 | 11800010247 | 56_11800010247_323284w_NE8.fastq.gz  | R246I   | 6.681  | 479.0  | 580.3766707168890  | 3.12 | NPH | 7.0 | 2 | 700 | 20NOV2020 09:17 | LY3819253 700mg IV           |
| 10241006 | 11800010247 | 56_11800010247_323284w_NE8.fastq.gz  | F429del | 2.732  | 549.0  | 580.3766707168890  | 3.12 | NPH | 7.0 | 2 | 700 | 20NOV2020 09:17 | LY3819253 700mg IV           |
| 10241006 | 11800010247 | 56_11800010247_323284w_NE8.fastq.gz  | T430del | 2.732  | 549.0  | 580.3766707168890  | 3.12 | NPH | 7.0 | 2 | 700 | 20NOV2020 09:17 | LY3819253 700mg IV           |
| 10241006 | 11800010247 | 56_11800010247_323284w_NE8.fastq.gz  | G431del | 2.747  | 546.0  | 580.3766707168890  | 3.12 | NPH | 7.0 | 2 | 700 | 20NOV2020 09:17 | LY3819253 700mg IV           |
| 10241006 | 11800010247 | 56_11800010247_323284w_NE8.fastq.gz  | C432del | 2.737  | 548.0  | 580.3766707168890  | 3.12 | NPH | 7.0 | 2 | 700 | 20NOV2020 09:17 | LY3819253 700mg IV           |
| 10241006 | 11800010247 | 56_11800010247_323284w_NE8.fastq.gz  | H519Q   | 7.331  | 532.0  | 580.3766707168890  | 3.12 | NPH | 7.0 | 2 | 700 | 20NOV2020 09:17 | LY3819253 700mg IV           |
| 10241006 | 11800010247 | 56_11800010247_323284w_NE8.fastq.gz  | R683W   | 3.17   | 347.0  | 580.3766707168890  | 3.12 | NPH | 7.0 | 2 | 700 | 20NOV2020 09:17 | LY3819253 700mg IV           |
| 10241006 | 11800010247 | 56_11800010247_323284w_NE8.fastq.gz  | E780K   | 1.205  | 166.0  | 580.3766707168890  | 3.12 | NPH | 7.0 | 2 | 700 | 20NOV2020 09:17 | LY3819253 700mg IV           |
| 10051004 | 11835659340 | 89_11835659340_323284w_NH5.fastq.gz  | F43S    | 7.938  | 2759.0 | 1043.3509389671400 | 6.03 | NPH | 7.0 | 2 | 700 | 26OCT2020 09:56 | LY3819253 700mg IV           |
| 10051004 | 11835659340 | 89_11835659340_323284w_NH5.fastq.gz  | G485V   | 2.408  | 1038.0 | 1043.3509389671400 | 6.03 | NPH | 7.0 | 2 | 700 | 26OCT2020 09:56 | LY3819253 700mg IV           |
| 10051004 | 11835659340 | 89_11835659340_323284w_NH5.fastq.gz  | R815G   | 5.556  | 18.0   | 1043.3509389671400 | 6.03 | NPH | 7.0 | 2 | 700 | 26OCT2020 09:56 | LY3819253 700mg IV           |
| 10021004 | 11833557056 | 72_11833557056_323284w_NF12.fastq.gz | R815K   | 1.923  | 52.0   | 815.0711743772240  | 4.95 | NPH | 7.0 | 2 | 700 | 26OCT2020 11:30 | LY3819253 700mg IV           |
| 10141004 | 11806310478 | 93_11806310478_323284w_NH9.fastq.gz  | H245D   | 17.033 | 728.0  | 806.8954489544900  | 2.78 | NPH | 7.0 | 2 | 700 | 29OCT2020 10:05 | LY3819253 700mg IV           |
| 10121005 | 11804194633 | 90_11804194633_323284w_NH6.fastq.gz  | K378R   | 2.37   | 633.0  | 607.8952496954930  | 4.82 | NPH | 7.0 | 2 | 700 | 28OCT2020 13:00 | Placebo for LY3819253 700 mg |
| 10121005 | 11804194633 | 90_11804194633_323284w_NH6.fastq.gz  | Q762K   | 1.149  | 87.0   | 607.8952496954930  | 4.82 | NPH | 7.0 | 2 | 700 | 28OCT2020 13:00 | Placebo for LY3819253 700 mg |
| 10121005 | 11804194633 | 90_11804194633_323284w_NH6.fastq.gz  | Q762H   | 1.149  | 87.0   | 607.8952496954930  | 4.82 | NPH | 7.0 | 2 | 700 | 28OCT2020 13:00 | Placebo for LY3819253 700 mg |
| 10891003 | 11835746763 | 28_11835746763_323284w_NC4.fastq.gz  | T302M   | 5.951  | 857.0  | 940.0575275397800  | 3.66 | NPH | 7.0 | 2 | 700 | 13NOV2020 12:10 | Placebo for LY3819253 700 mg |
| 10891003 | 11835746763 | 28_11835746763_323284w_NC4.fastq.gz  | E309G   | 8.108  | 888.0  | 940.0575275397800  | 3.66 | NPH | 7.0 | 2 | 700 | 13NOV2020 12:10 | Placebo for LY3819253 700 mg |
| 10891003 | 11835746763 | 28_11835746763_323284w_NC4.fastq.gz  | F338L   | 8.267  | 883.0  | 940.0575275397800  | 3.66 | NPH | 7.0 | 2 | 700 | 13NOV2020 12:10 | Placebo for LY3819253 700 mg |
| 10891003 | 11835746763 | 28_11835746763_323284w_NC4.fastq.gz  | T630I   | 10.027 | 728.0  | 940.0575275397800  | 3.66 | NPH | 7.0 | 2 | 700 | 13NOV2020 12:10 | Placebo for LY3819253 700 mg |
| 10891003 | 11835746763 | 28_11835746763_323284w_NC4.fastq.gz  | G798S   | 8.254  | 315.0  | 940.0575275397800  | 3.66 | NPH | 7.0 | 2 | 700 | 13NOV2020 12:10 | Placebo for LY3819253 700 mg |
| 11061001 | 11821057357 | 13_11821057357_323284w_NB1.fastq.gz  | E132V   | 1.709  | 468.0  | 517.5319662243670  | 3.0  | NPH | 7.0 | 2 | 700 | 11NOV2020 08:05 | LY3819253 700mg IV           |
| 11061001 | 11821057357 | 13_11821057357_323284w_NB1.fastq.gz  | N185I   | 1.004  | 498.0  | 517.5319662243670  | 3.0  | NPH | 7.0 | 2 | 700 | 11NOV2020 08:05 | LY3819253 700mg IV           |
| 11061001 | 11821057357 | 13_11821057357_323284w_NB1.fastq.gz  | G219V   | 2.079  | 481.0  | 517.5319662243670  | 3.0  | NPH | 7.0 | 2 | 700 | 11NOV2020 08:05 | LY3819253 700mg IV           |
| 11061001 | 11821057357 | 13_11821057357_323284w_NB1.fastq.gz  | E309G   | 2.281  | 526.0  | 517.5319662243670  | 3.0  | NPH | 7.0 | 2 | 700 | 11NOV2020 08:05 | LY3819253 700mg IV           |
| 11061001 | 11821057357 | 13_11821057357_323284w_NB1.fastq.gz  | T333K   | 2.107  | 522.0  | 517.5319662243670  | 3.0  | NPH | 7.0 | 2 | 700 | 11NOV2020 08:05 | LY3819253 700mg IV           |
| 11061001 | 11821057357 | 13_11821057357_323284w_NB1.fastq.gz  | T393I   | 1.183  | 507.0  | 517.5319662243670  | 3.0  | NPH | 7.0 | 2 | 700 | 11NOV2020 08:05 | LY3819253 700mg IV           |
| 11061001 | 11821057357 | 13_11821057357_323284w_NB1.fastq.gz  | V597L   | 1.754  | 399.0  | 517.5319662243670  | 3.0  | NPH | 7.0 | 2 | 700 | 11NOV2020 08:05 | LY3819253 700mg IV           |
| 11061001 | 11821057357 | 13_11821057357_323284w_NB1.fastq.gz  | A706V   | 2.36   | 339.0  | 517.5319662243670  | 3.0  | NPH | 7.0 | 2 | 700 | 11NOV2020 08:05 | LY3819253 700mg IV           |
| 11061001 | 11821057357 | 13_11821057357_323284w_NB1.fastq.gz  | S708F   | 1.479  | 338.0  | 517.5319662243670  | 3.0  | NPH | 7.0 | 2 | 700 | 11NOV2020 08:05 | LY3819253 700mg IV           |
| 11061001 | 11821057357 | 13_11821057357_323284w_NB1.fastq.gz  | A713S   | 1.235  | 324.0  | 517.5319662243670  | 3.0  | NPH | 7.0 | 2 | 700 | 11NOV2020 08:05 | LY3819253 700mg IV           |
| 11061001 | 11821057357 | 13_11821057357_323284w_NB1.fastq.gz  | Q779_   | 1.676  | 358.0  | 517.5319662243670  | 3.0  | NPH | 7.0 | 2 | 700 | 11NOV2020 08:05 | LY3819253 700mg IV           |
| 10261029 | 11856718351 | 3_11856718351_323284w_NA3.fastq.gz   | S50L    | 3.852  | 1428.0 | 676.3702801461630  | 3.21 | NPH | 7.0 | 2 | 700 | 05NOV2020 15:31 | LY3819253 700mg IV           |
| 10261029 | 11856718351 | 3_11856718351_323284w_NA3.fastq.gz   | T109N   | 3.785  | 687.0  | 676.3702801461630  | 3.21 | NPH | 7.0 | 2 | 700 | 05NOV2020 15:31 | LY3819253 700mg IV           |
| 10261029 | 11856718351 | 3_11856718351_323284w_NA3.fastq.gz   | F140del | 1.764  | 567.0  | 676.3702801461630  | 3.21 | NPH | 7.0 | 2 | 700 | 05NOV2020 15:31 | LY3819253 700mg IV           |
| 10261029 | 11856718351 | 3_11856718351_323284w_NA3.fastq.gz   | L276P   | 3.443  | 639.0  | 676.3702801461630  | 3.21 | NPH | 7.0 | 2 | 700 | 05NOV2020 15:31 | LY3819253 700mg IV           |
| 10261029 | 11856718351 | 3_11856718351_323284w_NA3.fastq.gz   | K310_   | 3.922  | 663.0  | 676.3702801461630  | 3.21 | NPH | 7.0 | 2 | 700 | 05NOV2020 15:31 | LY3819253 700mg IV           |
| 10261029 | 11856718351 | 3_11856718351_323284w_NA3.fastq.gz   | Q414H   | 2.614  | 612.0  | 676.3702801461630  | 3.21 | NPH | 7.0 | 2 | 700 | 05NOV2020 15:31 | LY3819253 700mg IV           |
| 10261029 | 11856718351 | 3_11856718351_323284w_NA3.fastq.gz   | N540I   | 3.872  | 594.0  | 676.3702801461630  | 3.21 | NPH | 7.0 | 2 | 700 | 05NOV2020 15:31 | LY3819253 700mg IV           |
| 10261029 | 11856718351 | 3_11856718351_323284w_NA3.fastq.gz   | F565L   | 2.815  | 604.0  | 676.3702801461630  | 3.21 | NPH | 7.0 | 2 | 700 | 05NOV2020 15:31 | LY3819253 700mg IV           |
| 10261029 | 11856718351 | 3_11856718351_323284w_NA3.fastq.gz   | A623del | 1.818  | 550.0  | 676.3702801461630  | 3.21 | NPH | 7.0 | 2 | 700 | 05NOV2020 15:31 | LY3819253 700mg IV           |
| 10371008 | 11844109707 | 39_11844109707_323284w_ND3.fastq.gz  | Q644_   | 4.233  | 756.0  | 1023.2             | 4.28 | NPH | 7.0 | 2 | 700 | 18NOV2020 12:20 | Placebo for LY3819253 700 mg |
| 10371008 | 11844109707 | 39_11844109707_323284w_ND3.fastq.gz  | L752F   | 1.008  | 496.0  | 1023.2             | 4.28 | NPH | 7.0 | 2 | 700 | 18NOV2020 12:20 | Placebo for LY3819253 700 mg |
| 10261028 | 11856718349 | 2_11856718349_323284w_NA2.fastq.gz   | L5F     | 12.872 | 1779.0 | 659.5128518971850  | 2.35 | NPH | 7.0 | 2 | 700 | 05NOV2020 09:58 | LY3819253 700mg IV           |
| 10261028 | 11856718349 | 2_11856718349_323284w_NA2.fastq.gz   | A372V   | 14.26  | 561.0  | 659.5128518971850  | 2.35 | NPH | 7.0 | 2 | 700 | 05NOV2020 09:58 | LY3819253 700mg IV           |
| 10261028 | 11856718349 | 2_11856718349_323284w_NA2.fastq.gz   | N532K   | 10.94  | 649.0  | 659.5128518971850  | 2.35 | NPH | 7.0 | 2 | 700 | 05NOV2020 09:58 | LY3819253 700mg IV           |
| 10261028 | 11856718349 | 2_11856718349_323284w_NA2.fastq.gz   | P579L   | 13.387 | 620.0  | 659.5128518971850  | 2.35 | NPH | 7.0 | 2 | 700 | 05NOV2020 09:58 | LY3819253 700mg IV           |
| 10261028 | 11856718349 | 2_11856718349_323284w_NA2.fastq.gz   | T676S   | 12.364 | 461.0  | 659.5128518971850  | 2.35 | NPH | 7.0 | 2 | 700 | 05NOV2020 09:58 | LY3819253 700mg IV           |
| 10051004 | 11835657295 | 1_11835657295_323555w_BA1.fastq.gz   | F43T    | 2.079  | 2501.0 | 1607.133495145630  | 7.77 | NAS | 7.0 | 2 | 700 | 26OCT2020 09:56 | LY3819253 700mg IV           |
| 10051004 | 11835657295 | 1_11835657295_323555w_BA1.fastq.gz   | D745G   | 1.256  | 1115.0 | 1607.133495145630  | 7.77 | NAS | 7.0 | 2 | 700 | 26OCT2020 09:56 | LY3819253 700mg IV           |
| 10051004 | 11835657295 | 1_11835657295_323555w_BA1.fastq.gz   | L821P   | 16.667 | 6.0    | 1607.133495145630  | 7.77 | NAS | 7.0 | 2 | 700 | 26OCT2020 09:56 | LY3819253 700mg IV           |
| 10021004 | 11833555011 | 47_11833555011_323555w_BD11.fastq.gz | L141del | 1.054  | 1139.0 | 2324.278928136420  | 3.56 | NAS | 7.0 | 2 | 700 | 26OCT2020 11:29 | LY3819253 700mg IV           |
| 10051005 | 11835722575 | 18_11835722575_323555w_BB6.fastq.gz  | Y38_    | 1.224  | 5230.0 | 1624.9975490196100 | 3.37 | NAS | 7.0 | 2 | 700 | 05NOV2020 10:15 | LY3819253 700mg IV           |
| 10051005 | 11835722575 | 18_11835722575_323555w_BB6.fastq.gz  | S60P    | 1.169  | 3422.0 | 1624.997549019     |      |     |     |   |     |                 |                              |

|          |             |                                       |       |        |         |                    |      |     |     |   |     |                 |                              |
|----------|-------------|---------------------------------------|-------|--------|---------|--------------------|------|-----|-----|---|-----|-----------------|------------------------------|
| 10291007 | 11833631808 | B1_11833631808_324017w_AG1.fastq.gz   | K378T | 1.111  | 270.0   | 2273.1948529411800 | 2.08 | NPH | 7.0 | 2 | 700 | 13NOV2020 09:33 | LY3819253 700mg IV           |
| 10291007 | 11833631808 | B1_11833631808_324017w_AG1.fastq.gz   | V433I | 1.01   | 10000.0 | 2273.1948529411800 | 2.08 | NPH | 7.0 | 2 | 700 | 13NOV2020 09:33 | LY3819253 700mg IV           |
| 10291007 | 11833631808 | B1_11833631808_324017w_AG1.fastq.gz   | Q804_ | 1.332  | 2478.0  | 2273.1948529411800 | 2.08 | NPH | 7.0 | 2 | 700 | 13NOV2020 09:33 | LY3819253 700mg IV           |
| 10181010 | 11816796545 | C4_11816796545_324017w_AH4.fastq.gz   | Q14_  | 2.283  | 2059.0  | 1079.3022974607000 | 3.01 | NPH | 7.0 | 2 | 700 | 19NOV2020 07:56 | LY3819253 700mg IV           |
| 10181010 | 11816796545 | C4_11816796545_324017w_AH4.fastq.gz   | L56S  | 3.281  | 1463.0  | 1079.3022974607000 | 3.01 | NPH | 7.0 | 2 | 700 | 19NOV2020 07:56 | LY3819253 700mg IV           |
| 10181010 | 11816796545 | C4_11816796545_324017w_AH4.fastq.gz   | S71F  | 2.247  | 1157.0  | 1079.3022974607000 | 3.01 | NPH | 7.0 | 2 | 700 | 19NOV2020 07:56 | LY3819253 700mg IV           |
| 10181010 | 11816796545 | C4_11816796545_324017w_AH4.fastq.gz   | S112L | 5.467  | 750.0   | 1079.3022974607000 | 3.01 | NPH | 7.0 | 2 | 700 | 19NOV2020 07:56 | LY3819253 700mg IV           |
| 10181010 | 11816796545 | C4_11816796545_324017w_AH4.fastq.gz   | L216F | 3.704  | 567.0   | 1079.3022974607000 | 3.01 | NPH | 7.0 | 2 | 700 | 19NOV2020 07:56 | LY3819253 700mg IV           |
| 10181010 | 11816796545 | C4_11816796545_324017w_AH4.fastq.gz   | G257V | 5.902  | 593.0   | 1079.3022974607000 | 3.01 | NPH | 7.0 | 2 | 700 | 19NOV2020 07:56 | LY3819253 700mg IV           |
| 10181010 | 11816796545 | C4_11816796545_324017w_AH4.fastq.gz   | A264V | 2.572  | 622.0   | 1079.3022974607000 | 3.01 | NPH | 7.0 | 2 | 700 | 19NOV2020 07:56 | LY3819253 700mg IV           |
| 10181010 | 11816796545 | C4_11816796545_324017w_AH4.fastq.gz   | A372V | 1.429  | 770.0   | 1079.3022974607000 | 3.01 | NPH | 7.0 | 2 | 700 | 19NOV2020 07:56 | LY3819253 700mg IV           |
| 10181010 | 11816796545 | C4_11816796545_324017w_AH4.fastq.gz   | S375F | 3.78   | 635.0   | 1079.3022974607000 | 3.01 | NPH | 7.0 | 2 | 700 | 19NOV2020 07:56 | LY3819253 700mg IV           |
| 10181010 | 11816796545 | C4_11816796545_324017w_AH4.fastq.gz   | V433I | 1.21   | 3059.0  | 1079.3022974607000 | 3.01 | NPH | 7.0 | 2 | 700 | 19NOV2020 07:56 | LY3819253 700mg IV           |
| 10181010 | 11816796545 | C4_11816796545_324017w_AH4.fastq.gz   | N450D | 5.393  | 3245.0  | 1079.3022974607000 | 3.01 | NPH | 7.0 | 2 | 700 | 19NOV2020 07:56 | LY3819253 700mg IV           |
| 10181010 | 11816796545 | C4_11816796545_324017w_AH4.fastq.gz   | R454S | 6.633  | 588.0   | 1079.3022974607000 | 3.01 | NPH | 7.0 | 2 | 700 | 19NOV2020 07:56 | LY3819253 700mg IV           |
| 10181010 | 11816796545 | C4_11816796545_324017w_AH4.fastq.gz   | A688S | 6.25   | 480.0   | 1079.3022974607000 | 3.01 | NPH | 7.0 | 2 | 700 | 19NOV2020 07:56 | LY3819253 700mg IV           |
| 10181010 | 11816796545 | C4_11816796545_324017w_AH4.fastq.gz   | Q804_ | 1.302  | 384.0   | 1079.3022974607000 | 3.01 | NPH | 7.0 | 2 | 700 | 19NOV2020 07:56 | LY3819253 700mg IV           |
| 10251006 | 11820979471 | A1_11820979471_324017w_AF1.fastq.gz   | V433I | 1.413  | 8139.0  | 3468.9791666666700 | 2.69 | NPH | 7.0 | 2 | 700 | 23OCT2020 08:42 | Placebo for LY3819253 700 mg |
| 10251006 | 11820979471 | A1_11820979471_324017w_AF1.fastq.gz   | T553I | 5.136  | 2804.0  | 3468.9791666666700 | 2.69 | NPH | 7.0 | 2 | 700 | 23OCT2020 08:42 | Placebo for LY3819253 700 mg |
| 10251006 | 11820979471 | A1_11820979471_324017w_AF1.fastq.gz   | V622F | 6.471  | 1839.0  | 3468.9791666666700 | 2.69 | NPH | 7.0 | 2 | 700 | 23OCT2020 08:42 | Placebo for LY3819253 700 mg |
| 10251006 | 11820979471 | A1_11820979471_324017w_AF1.fastq.gz   | G639V | 7.658  | 1789.0  | 3468.9791666666700 | 2.69 | NPH | 7.0 | 2 | 700 | 23OCT2020 08:42 | Placebo for LY3819253 700 mg |
| 10411002 | 11835728716 | B8_11835728716_324017w_AG8.fastq.gz   | V433I | 1.354  | 6276.0  | 1899.0638820638800 | 2.18 | NPH | 7.0 | 2 | 700 | 16NOV2020 14:15 | LY3819253 700mg IV           |
| 10411002 | 11835728716 | B8_11835728716_324017w_AG8.fastq.gz   | K786R | 2.023  | 939.0   | 1899.0638820638800 | 2.18 | NPH | 7.0 | 2 | 700 | 16NOV2020 14:15 | LY3819253 700mg IV           |
| 10051002 | 11835721543 | A2_11835721543_324017w_AF2.fastq.gz   | Q14_  | 6.316  | 7869.0  | 3210.427360774820  | 2.02 | NPH | 7.0 | 2 | 700 | 26OCT2020 13:40 | Placebo for LY3819253 700 mg |
| 10051002 | 11835721543 | A2_11835721543_324017w_AF2.fastq.gz   | Q173H | 6.585  | 2354.0  | 3210.427360774820  | 2.02 | NPH | 7.0 | 2 | 700 | 26OCT2020 13:40 | Placebo for LY3819253 700 mg |
| 10051002 | 11835721543 | A2_11835721543_324017w_AF2.fastq.gz   | S255P | 6.651  | 2120.0  | 3210.427360774820  | 2.02 | NPH | 7.0 | 2 | 700 | 26OCT2020 13:40 | Placebo for LY3819253 700 mg |
| 10051002 | 11835721543 | A2_11835721543_324017w_AF2.fastq.gz   | P337L | 18.692 | 4494.0  | 3210.427360774820  | 2.02 | NPH | 7.0 | 2 | 700 | 26OCT2020 13:40 | Placebo for LY3819253 700 mg |
| 10051002 | 11835721543 | A2_11835721543_324017w_AF2.fastq.gz   | P412S | 9.72   | 10000.0 | 3210.427360774820  | 2.02 | NPH | 7.0 | 2 | 700 | 26OCT2020 13:40 | Placebo for LY3819253 700 mg |
| 10051002 | 11835721543 | A2_11835721543_324017w_AF2.fastq.gz   | Q414_ | 5.04   | 10000.0 | 3210.427360774820  | 2.02 | NPH | 7.0 | 2 | 700 | 26OCT2020 13:40 | Placebo for LY3819253 700 mg |
| 10051002 | 11835721543 | A2_11835721543_324017w_AF2.fastq.gz   | V433I | 1.244  | 7798.0  | 3210.427360774820  | 2.02 | NPH | 7.0 | 2 | 700 | 26OCT2020 13:40 | Placebo for LY3819253 700 mg |
| 10051002 | 11835721543 | A2_11835721543_324017w_AF2.fastq.gz   | E465D | 5.778  | 3150.0  | 3210.427360774820  | 2.02 | NPH | 7.0 | 2 | 700 | 26OCT2020 13:40 | Placebo for LY3819253 700 mg |
| 10051002 | 11835721543 | A2_11835721543_324017w_AF2.fastq.gz   | P499S | 5.856  | 4201.0  | 3210.427360774820  | 2.02 | NPH | 7.0 | 2 | 700 | 26OCT2020 13:40 | Placebo for LY3819253 700 mg |
| 10051002 | 11835721543 | A2_11835721543_324017w_AF2.fastq.gz   | P579L | 5.972  | 1959.0  | 3210.427360774820  | 2.02 | NPH | 7.0 | 2 | 700 | 26OCT2020 13:40 | Placebo for LY3819253 700 mg |
| 10051002 | 11835721543 | A2_11835721543_324017w_AF2.fastq.gz   | N710K | 12.082 | 1374.0  | 3210.427360774820  | 2.02 | NPH | 7.0 | 2 | 700 | 26OCT2020 13:40 | Placebo for LY3819253 700 mg |
| 10051002 | 11835721543 | A2_11835721543_324017w_AF2.fastq.gz   | P728T | 11.111 | 1287.0  | 3210.427360774820  | 2.02 | NPH | 7.0 | 2 | 700 | 26OCT2020 13:40 | Placebo for LY3819253 700 mg |
| 10051002 | 11835721543 | A2_11835721543_324017w_AF2.fastq.gz   | S750R | 12.356 | 696.0   | 3210.427360774820  | 2.02 | NPH | 7.0 | 2 | 700 | 26OCT2020 13:40 | Placebo for LY3819253 700 mg |
| 10131009 | 11850406919 | A6_11850406919_324017w_AF6.fastq.gz   | T430I | 5.39   | 10000.0 | 2217.7735618115100 | 2.03 | NPH | 7.0 | 2 | 700 | 11NOV2020 14:09 | LY3819253 700mg IV           |
| 10131009 | 11850406919 | A6_11850406919_324017w_AF6.fastq.gz   | V433I | 1.417  | 6068.0  | 2217.7735618115100 | 2.03 | NPH | 7.0 | 2 | 700 | 11NOV2020 14:09 | LY3819253 700mg IV           |
| 10131009 | 11850406919 | A6_11850406919_324017w_AF6.fastq.gz   | V576A | 10.759 | 1292.0  | 2217.7735618115100 | 2.03 | NPH | 7.0 | 2 | 700 | 11NOV2020 14:09 | LY3819253 700mg IV           |
| 10131009 | 11850406919 | A6_11850406919_324017w_AF6.fastq.gz   | K786R | 1.339  | 672.0   | 2217.7735618115100 | 2.03 | NPH | 7.0 | 2 | 700 | 11NOV2020 14:09 | LY3819253 700mg IV           |
| 10041008 | 11802102030 | B7_11802102030_324017w_AG7.fastq.gz   | V433I | 1.43   | 10000.0 | 3309.28029375765   | 2.54 | NPH | 7.0 | 2 | 700 | 23NOV2020 09:15 | Placebo for LY3819253 700 mg |
| 10081005 | 11837756686 | A5_11837756686_324017w_AF5.fastq.gz   | V433I | 1.29   | 10000.0 | 3866.2864137086900 | 2.28 | NPH | 7.0 | 2 | 700 | 29OCT2020 10:43 | LY3819253 700mg IV           |
| 10081005 | 11837756686 | A5_11837756686_324017w_AF5.fastq.gz   | T604I | 17.107 | 2385.0  | 3866.2864137086900 | 2.28 | NPH | 7.0 | 2 | 700 | 29OCT2020 10:43 | LY3819253 700mg IV           |
| 10061008 | 11804197196 | B3_11804197196_324017w_AG3.fastq.gz   | E154_ | 16.482 | 813.0   | 1894.1190765492100 | 3.02 | NPH | 7.0 | 2 | 700 | 17NOV2020 15:32 | LY3819253 700mg IV           |
| 10061008 | 11804197196 | B3_11804197196_324017w_AG3.fastq.gz   | V433I | 1.057  | 6621.0  | 1894.1190765492100 | 3.02 | NPH | 7.0 | 2 | 700 | 17NOV2020 15:32 | LY3819253 700mg IV           |
| 10061008 | 11804197196 | B3_11804197196_324017w_AG3.fastq.gz   | I434T | 8.056  | 6629.0  | 1894.1190765492100 | 3.02 | NPH | 7.0 | 2 | 700 | 17NOV2020 15:32 | LY3819253 700mg IV           |
| 10061008 | 11804197196 | B3_11804197196_324017w_AG3.fastq.gz   | N439D | 2.499  | 6562.0  | 1894.1190765492100 | 3.02 | NPH | 7.0 | 2 | 700 | 17NOV2020 15:32 | LY3819253 700mg IV           |
| 10061008 | 11804197196 | B3_11804197196_324017w_AG3.fastq.gz   | F515S | 8.331  | 3073.0  | 1894.1190765492100 | 3.02 | NPH | 7.0 | 2 | 700 | 17NOV2020 15:32 | LY3819253 700mg IV           |
| 10061008 | 11804197196 | B3_11804197196_324017w_AG3.fastq.gz   | L611F | 8.583  | 1433.0  | 1894.1190765492100 | 3.02 | NPH | 7.0 | 2 | 700 | 17NOV2020 15:32 | LY3819253 700mg IV           |
| 10061008 | 11804197196 | B3_11804197196_324017w_AG3.fastq.gz   | G744V | 8.625  | 858.0   | 1894.1190765492100 | 3.02 | NPH | 7.0 | 2 | 700 | 17NOV2020 15:32 | LY3819253 700mg IV           |
| 10061008 | 11804197196 | B3_11804197196_324017w_AG3.fastq.gz   | Q779_ | 7.4    | 1054.0  | 1894.1190765492100 | 3.02 | NPH | 7.0 | 2 | 700 | 17NOV2020 15:32 | LY3819253 700mg IV           |
| 10061008 | 11804197196 | B3_11804197196_324017w_AG3.fastq.gz   | K786R | 2.345  | 1322.0  | 1894.1190765492100 | 3.02 | NPH | 7.0 | 2 | 700 | 17NOV2020 15:32 | LY3819253 700mg IV           |
| 10331001 | 11839860291 | A3_11839860291_323524w_BA3.fastq.gz   | T20I  | 3.419  | 3919.0  | 1190.9621026894900 | 3.7  | NPH | 7.0 | 2 | 700 | 21OCT2020 13:18 | LY3819253 700mg IV           |
| 10331001 | 11839860291 | A3_11839860291_323524w_BA3.fastq.gz   | L176F | 19.155 | 1018.0  | 1190.9621026894900 | 3.7  | NPH | 7.0 | 2 | 700 | 21OCT2020 13:18 | LY3819253 700mg IV           |
| 10331001 | 11839860291 | A3_11839860291_323524w_BA3.fastq.gz   | G416E | 16.653 | 1183.0  | 1190.9621026894900 | 3.7  | NPH | 7.0 | 2 | 700 | 21OCT2020 13:18 | LY3819253 700mg IV           |
| 10331001 | 11839860291 | A3_11839860291_323524w_BA3.fastq.gz   | G566D | 16.939 | 1163.0  | 1190.9621026894900 | 3.7  | NPH | 7.0 | 2 | 700 | 21OCT2020 13:18 | LY3819253 700mg IV           |
| 10331001 | 11839860291 | A3_11839860291_323524w_BA3.fastq.gz   | H655Y | 14.807 | 905.0   | 1190.9621026894900 | 3.7  | NPH | 7.0 | 2 | 700 | 21OCT2020 13:18 | LY3819253 700mg IV           |
| 10421011 | 11852449483 | F10_11852449483_323524w_BF10.fastq.gz | L8F   | 12.227 | 3386.0  | 1470.3504273504300 | 4.64 | NPH | 7.0 | 2 | 700 | 05NOV2020 13:34 | Placebo for LY3819253 700 mg |
| 10421011 | 11852449483 | F10_11852449483_323524w_BF10.fastq.gz | S12F  | 9.047  | 3537.0  | 1470.3504273504300 | 4.64 | NPH | 7.0 | 2 | 700 | 05NOV2020 13:34 | Placebo for LY3819253 700 mg |
| 10421011 | 11852449483 | F10_11852449483_323524w_BF10.fastq.gz | E298D | 10.29  | 1312.0  | 1470.3504273504300 | 4.64 | NPH | 7.0 | 2 | 700 | 05NOV2020 13:34 | Placebo for LY3819253 700 mg |
| 10421011 | 11852449483 | F10_11852449483_323524w_BF10.fastq.gz | Y313H | 1.609  | 1305.0  | 1470.3504273504300 | 4.64 | NPH | 7.0 | 2 | 700 | 05NOV2020 13:34 | Placebo for LY3819253 700 mg |
| 10421011 | 11852449483 | F10_11852449483_323524w_BF10.fastq.gz | A653V | 9.047  | 1039.0  | 1470.3504273504300 | 4.64 | NPH | 7.0 | 2 | 700 | 05NOV2020 13:34 | Placebo for LY3819253 700 mg |
| 10421011 | 11852449483 | F10_11852449483_323524w_BF10.fastq.gz | R765C | 9.747  | 513.0   | 1470.3504273504300 | 4.64 | NPH | 7.0 | 2 | 700 | 05NOV2020 13:34 | Placebo for LY3819253 700 mg |
| 10201011 | 11818967109 | B6_11818967109_323524w_BB6.fastq.gz   | I105S | 1.442  | 208.0   | 879.3844282238440  | 3.8  | NPH | 7.0 | 2 | 700 | 03NOV2020 08:23 | Placebo for LY3819253 700 mg |
| 10201011 |             |                                       |       |        |         |                    |      |     |     |   |     |                 |                              |

|          |             |                                      |       |        |        |                    |      |     |     |   |     |                 |                              |
|----------|-------------|--------------------------------------|-------|--------|--------|--------------------|------|-----|-----|---|-----|-----------------|------------------------------|
| 10201007 | 11850403331 | A4_11850403331_323524w_BA4.fastq.gz  | R682W | 1.114  | 718.0  | 1282.7660606060600 | 4.24 | NPH | 7.0 | 2 | 700 | 22OCT2020 08:42 | LY3819253 700mg IV           |
| 10201007 | 11850403331 | A4_11850403331_323524w_BA4.fastq.gz  | S691F | 1.515  | 726.0  | 1282.7660606060600 | 4.24 | NPH | 7.0 | 2 | 700 | 22OCT2020 08:42 | LY3819253 700mg IV           |
| 10201007 | 11850403331 | A4_11850403331_323524w_BA4.fastq.gz  | D745Y | 1.174  | 426.0  | 1282.7660606060600 | 4.24 | NPH | 7.0 | 2 | 700 | 22OCT2020 08:42 | LY3819253 700mg IV           |
| 10201007 | 11850403331 | A4_11850403331_323524w_BA4.fastq.gz  | Q787_ | 1.869  | 428.0  | 1282.7660606060600 | 4.24 | NPH | 7.0 | 2 | 700 | 22OCT2020 08:42 | LY3819253 700mg IV           |
| 10561003 | 11839942474 | 40_11839942474_323232w_AD4.fastq.gz  | P39S  | 3.284  | 8374.0 | 3110.9951865222600 | 3.45 | NPH | 7.0 | 2 | 700 | 02NOV2020 10:38 | Placebo for LY3819253 700 mg |
| 10561003 | 11839942474 | 40_11839942474_323232w_AD4.fastq.gz  | S255L | 1.458  | 2813.0 | 3110.9951865222600 | 3.45 | NPH | 7.0 | 2 | 700 | 02NOV2020 10:38 | Placebo for LY3819253 700 mg |
| 10561003 | 11839942474 | 40_11839942474_323232w_AD4.fastq.gz  | A262V | 1.607  | 2863.0 | 3110.9951865222600 | 3.45 | NPH | 7.0 | 2 | 700 | 02NOV2020 10:38 | Placebo for LY3819253 700 mg |
| 10561003 | 11839942474 | 40_11839942474_323232w_AD4.fastq.gz  | Y279N | 3.025  | 2744.0 | 3110.9951865222600 | 3.45 | NPH | 7.0 | 2 | 700 | 02NOV2020 10:38 | Placebo for LY3819253 700 mg |
| 10561003 | 11839942474 | 40_11839942474_323232w_AD4.fastq.gz  | Q474K | 3.936  | 3125.0 | 3110.9951865222600 | 3.45 | NPH | 7.0 | 2 | 700 | 02NOV2020 10:38 | Placebo for LY3819253 700 mg |
| 10561003 | 11839942474 | 40_11839942474_323232w_AD4.fastq.gz  | P579S | 3.577  | 2963.0 | 3110.9951865222600 | 3.45 | NPH | 7.0 | 2 | 700 | 02NOV2020 10:38 | Placebo for LY3819253 700 mg |
| 10561003 | 11839942474 | 40_11839942474_323232w_AD4.fastq.gz  | T630I | 1.786  | 2519.0 | 3110.9951865222600 | 3.45 | NPH | 7.0 | 2 | 700 | 02NOV2020 10:38 | Placebo for LY3819253 700 mg |
| 10561003 | 11839942474 | 40_11839942474_323232w_AD4.fastq.gz  | G639S | 3.547  | 2453.0 | 3110.9951865222600 | 3.45 | NPH | 7.0 | 2 | 700 | 02NOV2020 10:38 | Placebo for LY3819253 700 mg |
| 10561003 | 11839942474 | 40_11839942474_323232w_AD4.fastq.gz  | R683Q | 3.742  | 2031.0 | 3110.9951865222600 | 3.45 | NPH | 7.0 | 2 | 700 | 02NOV2020 10:38 | Placebo for LY3819253 700 mg |
| 10561003 | 11839942474 | 40_11839942474_323232w_AD4.fastq.gz  | L699P | 2.906  | 1858.0 | 3110.9951865222600 | 3.45 | NPH | 7.0 | 2 | 700 | 02NOV2020 10:38 | Placebo for LY3819253 700 mg |
| 10561003 | 11839942474 | 40_11839942474_323232w_AD4.fastq.gz  | E773G | 1.075  | 930.0  | 3110.9951865222600 | 3.45 | NPH | 7.0 | 2 | 700 | 02NOV2020 10:38 | Placebo for LY3819253 700 mg |
| 10561003 | 11839942474 | 40_11839942474_323232w_AD4.fastq.gz  | Q779K | 3.6    | 861.0  | 3110.9951865222600 | 3.45 | NPH | 7.0 | 2 | 700 | 02NOV2020 10:38 | Placebo for LY3819253 700 mg |
| 10561003 | 11839942474 | 40_11839942474_323232w_AD4.fastq.gz  | K814N | 12.5   | 8.0    | 3110.9951865222600 | 3.45 | NPH | 7.0 | 2 | 700 | 02NOV2020 10:38 | Placebo for LY3819253 700 mg |
| 10561004 | 11839943233 | 42_11839943233_323232w_AD6.fastq.gz  | P809S | 1.02   | 490.0  | 1816.032967032970  | 4.14 | NPH | 7.0 | 2 | 700 | 02NOV2020 10:10 | Placebo for LY3819253 700 mg |
| 10021007 | 11833556803 | 78_11833556803_323232w_AG6.fastq.gz  | P295L | 4.169  | 1775.0 | 1782.5361963190200 | 2.95 | NPH | 7.0 | 2 | 700 | 10NOV2020 11:17 | LY3819253 700mg IV           |
| 10021007 | 11833556803 | 78_11833556803_323232w_AG6.fastq.gz  | T415I | 5.906  | 1744.0 | 1782.5361963190200 | 2.95 | NPH | 7.0 | 2 | 700 | 10NOV2020 11:17 | LY3819253 700mg IV           |
| 10021007 | 11833556803 | 78_11833556803_323232w_AG6.fastq.gz  | A647T | 6.869  | 1354.0 | 1782.5361963190200 | 2.95 | NPH | 7.0 | 2 | 700 | 10NOV2020 11:17 | LY3819253 700mg IV           |
| 10891006 | 11848253577 | 28_11848253577_323232w_AC4.fastq.gz  | T114I | 1.064  | 1880.0 | 2047.2463235294100 | 3.49 | NPH | 7.0 | 2 | 700 | 23NOV2020 10:33 | LY3819253 700mg IV           |
| 10891006 | 11848253577 | 28_11848253577_323232w_AC4.fastq.gz  | C301G | 1.157  | 1901.0 | 2047.2463235294100 | 3.49 | NPH | 7.0 | 2 | 700 | 23NOV2020 10:33 | LY3819253 700mg IV           |
| 10891006 | 11848253577 | 28_11848253577_323232w_AC4.fastq.gz  | Q414K | 1.129  | 1949.0 | 2047.2463235294100 | 3.49 | NPH | 7.0 | 2 | 700 | 23NOV2020 10:33 | LY3819253 700mg IV           |
| 10891006 | 11848253577 | 28_11848253577_323232w_AC4.fastq.gz  | S591F | 1.042  | 1728.0 | 2047.2463235294100 | 3.49 | NPH | 7.0 | 2 | 700 | 23NOV2020 10:33 | LY3819253 700mg IV           |
| 10011023 | 11821065478 | 38_11821065478_323232w_AD2.fastq.gz  | A706V | 1.356  | 1180.0 | 1846.4966517857100 | 6.43 | NAS | 7.0 | 2 | 700 | 20NOV2020 13:32 | Placebo for LY3819253 700 mg |
| 10421009 | 11804219206 | 85_11804219206_323232w_AH1.fastq.gz  | S640F | 1.481  | 2701.0 | 3566.5982905982900 | 4.97 | NPH | 7.0 | 2 | 700 | 27OCT2020 09:43 | Placebo for LY3819253 700 mg |
| 10421007 | 11821067022 | 84_11821067022_323232w_AG12.fastq.gz | S297A | 1.162  | 1635.0 | 1811.7155067155100 | 3.61 | NPH | 7.0 | 2 | 700 | 20OCT2020 10:08 | Placebo for LY3819253 700 mg |
| 10421007 | 11821067022 | 84_11821067022_323232w_AG12.fastq.gz | E298K | 1.418  | 1622.0 | 1811.7155067155100 | 3.61 | NPH | 7.0 | 2 | 700 | 20OCT2020 10:08 | Placebo for LY3819253 700 mg |
| 10421007 | 11821067022 | 84_11821067022_323232w_AG12.fastq.gz | Y365C | 1.039  | 1732.0 | 1811.7155067155100 | 3.61 | NPH | 7.0 | 2 | 700 | 20OCT2020 10:08 | Placebo for LY3819253 700 mg |
| 10421007 | 11821067022 | 84_11821067022_323232w_AG12.fastq.gz | F392S | 1.211  | 1651.0 | 1811.7155067155100 | 3.61 | NPH | 7.0 | 2 | 700 | 20OCT2020 10:08 | Placebo for LY3819253 700 mg |
| 10421007 | 11821067022 | 84_11821067022_323232w_AG12.fastq.gz | L611P | 1.358  | 1546.0 | 1811.7155067155100 | 3.61 | NPH | 7.0 | 2 | 700 | 20OCT2020 10:08 | Placebo for LY3819253 700 mg |
| 10421007 | 11821067022 | 84_11821067022_323232w_AG12.fastq.gz | H625R | 1.377  | 1598.0 | 1811.7155067155100 | 3.61 | NPH | 7.0 | 2 | 700 | 20OCT2020 10:08 | Placebo for LY3819253 700 mg |
| 10421007 | 11821067022 | 84_11821067022_323232w_AG12.fastq.gz | N777S | 1.515  | 1320.0 | 1811.7155067155100 | 3.61 | NPH | 7.0 | 2 | 700 | 20OCT2020 10:08 | Placebo for LY3819253 700 mg |
| 10371001 | 11833647370 | 90_11833647370_323232w_AH6.fastq.gz  | Q134K | 7.587  | 2860.0 | 3242.0724815724800 | 2.86 | NPH | 7.0 | 2 | 700 | 05NOV2020 12:45 | LY3819253 700mg IV           |
| 10371001 | 11833647370 | 90_11833647370_323232w_AH6.fastq.gz  | T240I | 7.413  | 3170.0 | 3242.0724815724800 | 2.86 | NPH | 7.0 | 2 | 700 | 05NOV2020 12:45 | LY3819253 700mg IV           |
| 10491001 | 11852524815 | 88_11852524815_323232w_AH4.fastq.gz  | A27V  | 18.791 | 9840.0 | 3729.4685646500600 | 5.78 | NPH | 7.0 | 2 | 700 | 04NOV2020 10:26 | Placebo for LY3819253 700 mg |
| 10491001 | 11852524815 | 88_11852524815_323232w_AH4.fastq.gz  | R567I | 2.261  | 3715.0 | 3729.4685646500600 | 5.78 | NPH | 7.0 | 2 | 700 | 04NOV2020 10:26 | Placebo for LY3819253 700 mg |
| 10311014 | 11841957060 | 62_11841957060_323232w_AF2.fastq.gz  | V90F  | 3.239  | 3087.0 | 3310.548780487810  | 2.74 | NPH | 7.0 | 2 | 700 | 25NOV2020 07:23 | Placebo for LY3819253 700 mg |
| 10311014 | 11841957060 | 62_11841957060_323232w_AF2.fastq.gz  | N137D | 3.828  | 3004.0 | 3310.548780487810  | 2.74 | NPH | 7.0 | 2 | 700 | 25NOV2020 07:23 | Placebo for LY3819253 700 mg |
| 10311014 | 11841957060 | 62_11841957060_323232w_AF2.fastq.gz  | K147N | 3.194  | 3006.0 | 3310.548780487810  | 2.74 | NPH | 7.0 | 2 | 700 | 25NOV2020 07:23 | Placebo for LY3819253 700 mg |
| 10311014 | 11841957060 | 62_11841957060_323232w_AF2.fastq.gz  | A411V | 3.188  | 3513.0 | 3310.548780487810  | 2.74 | NPH | 7.0 | 2 | 700 | 25NOV2020 07:23 | Placebo for LY3819253 700 mg |
| 10311014 | 11841957060 | 62_11841957060_323232w_AF2.fastq.gz  | P426L | 3.332  | 3541.0 | 3310.548780487810  | 2.74 | NPH | 7.0 | 2 | 700 | 25NOV2020 07:23 | Placebo for LY3819253 700 mg |
| 10311014 | 11841957060 | 62_11841957060_323232w_AF2.fastq.gz  | Q613R | 1.65   | 2848.0 | 3310.548780487810  | 2.74 | NPH | 7.0 | 2 | 700 | 25NOV2020 07:23 | Placebo for LY3819253 700 mg |
| 10311014 | 11841957060 | 62_11841957060_323232w_AF2.fastq.gz  | E654D | 2.857  | 2450.0 | 3310.548780487810  | 2.74 | NPH | 7.0 | 2 | 700 | 25NOV2020 07:23 | Placebo for LY3819253 700 mg |
| 10291002 | 11833630786 | 87_11833630786_323232w_AH3.fastq.gz  | S112L | 1.072  | 1865.0 | 2005.612745098040  | 3.81 | NPH | 7.0 | 2 | 700 | 03NOV2020 10:08 | LY3819253 700mg IV           |
| 10291002 | 11833630786 | 87_11833630786_323232w_AH3.fastq.gz  | L176F | 1.004  | 1892.0 | 2005.612745098040  | 3.81 | NPH | 7.0 | 2 | 700 | 03NOV2020 10:08 | LY3819253 700mg IV           |
| 10291002 | 11833630786 | 87_11833630786_323232w_AH3.fastq.gz  | R765C | 2.439  | 287.0  | 2005.612745098040  | 3.81 | NPH | 7.0 | 2 | 700 | 03NOV2020 10:08 | LY3819253 700mg IV           |
| 10291002 | 11833630786 | 87_11833630786_323232w_AH3.fastq.gz  | S803P | 1.212  | 495.0  | 2005.612745098040  | 3.81 | NPH | 7.0 | 2 | 700 | 03NOV2020 10:08 | LY3819253 700mg IV           |
| 10051009 | 11854552069 | 33_11854552069_323232w_AC9.fastq.gz  | A348V | 1.155  | 5195.0 | 4610.054479418890  | 3.28 | NPH | 7.0 | 2 | 700 | 19NOV2020 10:10 | LY3819253 700mg IV           |
| 10051009 | 11854552069 | 33_11854552069_323232w_AC9.fastq.gz  | A352V | 1.038  | 5393.0 | 4610.054479418890  | 3.28 | NPH | 7.0 | 2 | 700 | 19NOV2020 10:10 | LY3819253 700mg IV           |
| 10051009 | 11854552069 | 33_11854552069_323232w_AC9.fastq.gz  | I358V | 1.207  | 5301.0 | 4610.054479418890  | 3.28 | NPH | 7.0 | 2 | 700 | 19NOV2020 10:10 | LY3819253 700mg IV           |
| 10051009 | 11854552069 | 33_11854552069_323232w_AC9.fastq.gz  | S371P | 1.094  | 5028.0 | 4610.054479418890  | 3.28 | NPH | 7.0 | 2 | 700 | 19NOV2020 10:10 | LY3819253 700mg IV           |
| 10051009 | 11854552069 | 33_11854552069_323232w_AC9.fastq.gz  | P384F | 1.069  | 5144.0 | 4610.054479418890  | 3.28 | NPH | 7.0 | 2 | 700 | 19NOV2020 10:10 | LY3819253 700mg IV           |
| 10051009 | 11854552069 | 33_11854552069_323232w_AC9.fastq.gz  | G496V | 1.035  | 4638.0 | 4610.054479418890  | 3.28 | NPH | 7.0 | 2 | 700 | 19NOV2020 10:10 | LY3819253 700mg IV           |
| 10051009 | 11854552069 | 33_11854552069_323232w_AC9.fastq.gz  | T553I | 1.075  | 4373.0 | 4610.054479418890  | 3.28 | NPH | 7.0 | 2 | 700 | 19NOV2020 10:10 | LY3819253 700mg IV           |
| 10051009 | 11854552069 | 33_11854552069_323232w_AC9.fastq.gz  | Q580H | 1.076  | 4184.0 | 4610.054479418890  | 3.28 | NPH | 7.0 | 2 | 700 | 19NOV2020 10:10 | LY3819253 700mg IV           |
| 10421014 | 11852449737 | 3_11852449737_323232w_AA3.fastq.gz   | K202N | 1.986  | 4128.0 | 3939.2998790810200 | 2.81 | NPH | 7.0 | 2 | 700 | 09NOV2020 12:13 | Placebo for LY3819253 700 mg |
| 10421014 | 11852449737 | 3_11852449737_323232w_AA3.fastq.gz   | G404D | 1.598  | 4129.0 | 3939.2998790810200 | 2.81 | NPH | 7.0 | 2 | 700 | 09NOV2020 12:13 | Placebo for LY3819253 700 mg |
| 10421014 | 11852449737 | 3_11852449737_323232w_AA3.fastq.gz   | P499H | 1.529  | 4054.0 | 3939.2998790810200 | 2.81 | NPH | 7.0 | 2 | 700 | 09NOV2020 12:13 | Placebo for LY3819253 700 mg |
| 10421014 | 11852449737 | 3_11852449737_323232w_AA3.fastq.gz   | P521L | 1.541  | 4087.0 | 3939.2998790810200 | 2.81 | NPH | 7.0 | 2 | 700 | 09NOV2020 12:13 | Placebo for LY3819253 700 mg |
| 10421014 | 11852449737 | 3_11852449737_323232w_AA3.fastq.gz   | L752P | 2.208  | 951.0  | 3939.2998790810200 | 2.81 | NPH | 7.0 | 2 | 700 | 09NOV2020 12:13 | Placebo for LY3819253 700 mg |
| 10421014 | 11852449737 | 3_11852449737_323232w_AA3.fastq.gz   | L763F | 1.064  | 658.0  | 3939.2998790810200 | 2.81 | NPH | 7.0 | 2 | 700 | 09NOV2020 12:13 | Placebo for LY3819253 700 mg |
| 10421014 | 11852449737 | 3_11852449737_323232w_AA3.fastq.gz   | R765C | 1.809  | 608.0  | 3939.2998790810200 | 2.81 | NPH | 7.0 | 2 |     |                 |                              |

|          |             |                                       |         |        |        |                    |      |     |     |   |     |                 |                              |
|----------|-------------|---------------------------------------|---------|--------|--------|--------------------|------|-----|-----|---|-----|-----------------|------------------------------|
| 10051003 | 11835659590 | 10_59590_322851w_CA10.fastq.gz        | P507T   | 2.491  | 1084.0 | 1133.9975609756100 | 3.48 | NPH | 7.0 | 2 | 700 | 26OCT2020 09:56 | LY3819253 700mg IV           |
| 10051003 | 11835659590 | 10_59590_322851w_CA10.fastq.gz        | L517F   | 4.676  | 1048.0 | 1133.9975609756100 | 3.48 | NPH | 7.0 | 2 | 700 | 26OCT2020 09:56 | LY3819253 700mg IV           |
| 10051003 | 11835659590 | 10_59590_322851w_CA10.fastq.gz        | L533F   | 1.69   | 1006.0 | 1133.9975609756100 | 3.48 | NPH | 7.0 | 2 | 700 | 26OCT2020 09:56 | LY3819253 700mg IV           |
| 10051003 | 11835659590 | 10_59590_322851w_CA10.fastq.gz        | S640F   | 4.089  | 807.0  | 1133.9975609756100 | 3.48 | NPH | 7.0 | 2 | 700 | 26OCT2020 09:56 | LY3819253 700mg IV           |
| 10051003 | 11835659590 | 10_59590_322851w_CA10.fastq.gz        | T719S   | 3.917  | 868.0  | 1133.9975609756100 | 3.48 | NPH | 7.0 | 2 | 700 | 26OCT2020 09:56 | LY3819253 700mg IV           |
| 10021003 | 11833621770 | 5_21770_322851w_CA5.fastq.gz          | K537R   | 1.005  | 1990.0 | 2170.8002436053600 | 3.3  | NPH | 7.0 | 2 | 700 | 21OCT2020 10:15 | Placebo for LY3819253 700 mg |
| 10021003 | 11833621770 | 5_21770_322851w_CA5.fastq.gz          | V642G   | 1.208  | 1407.0 | 2170.8002436053600 | 3.3  | NPH | 7.0 | 2 | 700 | 21OCT2020 10:15 | Placebo for LY3819253 700 mg |
| 10021005 | 11833554507 | 46_54507_322851w_CD10.fastq.gz        | K202_   | 16.749 | 1218.0 | 1421.4017199017200 | 2.82 | NPH | 7.0 | 2 | 700 | 27OCT2020 12:24 | LY3819253 700mg IV           |
| 10051005 | 11835724620 | 84_24620_322847w_BG12.fastq.gz        | V11A    | 2.364  | 6345.0 | 2109.1939759036100 | 2.92 | NPH | 7.0 | 2 | 700 | 05NOV2020 10:15 | LY3819253 700mg IV           |
| 10051005 | 11835724620 | 84_24620_322847w_BG12.fastq.gz        | S50L    | 1.108  | 4152.0 | 2109.1939759036100 | 2.92 | NPH | 7.0 | 2 | 700 | 05NOV2020 10:15 | LY3819253 700mg IV           |
| 10051005 | 11835724620 | 84_24620_322847w_BG12.fastq.gz        | F59L    | 2.038  | 3336.0 | 2109.1939759036100 | 2.92 | NPH | 7.0 | 2 | 700 | 05NOV2020 10:15 | LY3819253 700mg IV           |
| 10051005 | 11835724620 | 84_24620_322847w_BG12.fastq.gz        | Y91F    | 2.218  | 2029.0 | 2109.1939759036100 | 2.92 | NPH | 7.0 | 2 | 700 | 05NOV2020 10:15 | LY3819253 700mg IV           |
| 10051005 | 11835724620 | 84_24620_322847w_BG12.fastq.gz        | F140I   | 2.25   | 1867.0 | 2109.1939759036100 | 2.92 | NPH | 7.0 | 2 | 700 | 05NOV2020 10:15 | LY3819253 700mg IV           |
| 10051005 | 11835724620 | 84_24620_322847w_BG12.fastq.gz        | F186L   | 1.165  | 1888.0 | 2109.1939759036100 | 2.92 | NPH | 7.0 | 2 | 700 | 05NOV2020 10:15 | LY3819253 700mg IV           |
| 10051005 | 11835724620 | 84_24620_322847w_BG12.fastq.gz        | C336S   | 2.081  | 1874.0 | 2109.1939759036100 | 2.92 | NPH | 7.0 | 2 | 700 | 05NOV2020 10:15 | LY3819253 700mg IV           |
| 10051005 | 11835724620 | 84_24620_322847w_BG12.fastq.gz        | P507S   | 2.079  | 2068.0 | 2109.1939759036100 | 2.92 | NPH | 7.0 | 2 | 700 | 05NOV2020 10:15 | LY3819253 700mg IV           |
| 10051005 | 11835724620 | 84_24620_322847w_BG12.fastq.gz        | E619_   | 1.193  | 1677.0 | 2109.1939759036100 | 2.92 | NPH | 7.0 | 2 | 700 | 05NOV2020 10:15 | LY3819253 700mg IV           |
| 10051005 | 11835724620 | 84_24620_322847w_BG12.fastq.gz        | T761I   | 2.491  | 843.0  | 2109.1939759036100 | 2.92 | NPH | 7.0 | 2 | 700 | 05NOV2020 10:15 | LY3819253 700mg IV           |
| 10171006 | 11833638145 | 6_11833638145_323283w_CD5.fastq.gz    | F135I   | 15.9   | 956.0  | 1035.9154411764700 | 2.25 | NPH | 7.0 | 2 | 700 | 16NOV2020 11:18 | Placebo for LY3819253 700 mg |
| 10171006 | 11833638145 | 6_11833638145_323283w_CD5.fastq.gz    | Q804K   | 9.061  | 309.0  | 1035.9154411764700 | 2.25 | NPH | 7.0 | 2 | 700 | 16NOV2020 11:18 | Placebo for LY3819253 700 mg |
| 10121007 | 11804195145 | 3_11804195145_323283w_CD2.fastq.gz    | L24S    | 2.011  | 2834.0 | 841.5985312117500  | 3.29 | NPH | 7.0 | 2 | 700 | 09NOV2020 12:49 | Placebo for LY3819253 700 mg |
| 10121007 | 11804195145 | 3_11804195145_323283w_CD2.fastq.gz    | H245Y   | 13.494 | 704.0  | 841.5985312117500  | 3.29 | NPH | 7.0 | 2 | 700 | 09NOV2020 12:49 | Placebo for LY3819253 700 mg |
| 10121007 | 11804195145 | 3_11804195145_323283w_CD2.fastq.gz    | N717K   | 14.39  | 549.0  | 841.5985312117500  | 3.29 | NPH | 7.0 | 2 | 700 | 09NOV2020 12:49 | Placebo for LY3819253 700 mg |
| 10081006 | 11837818186 | B2_11837818186_324019w_CB2.fastq.gz   | K786R   | 2.265  | 927.0  | 2483.6153846153800 | 2.98 | NAS | 7.0 | 2 | 700 | 05NOV2020 07:57 | LY3819253 700mg IV           |
| 10661001 | 11833643661 | D3_11833643661_324019w_CD3.fastq.gz   | K786R   | 2.97   | 606.0  | 1738.6842751842800 | 3.46 | NPH | 7.0 | 2 | 700 | 16NOV2020 14:15 | Placebo for LY3819253 700 mg |
| 10201008 | 11818965062 | G8_11818965062_324019w_CG8.fastq.gz   | G219V   | 2.741  | 2262.0 | 3565.4875239923200 | 4.94 | NPH | 7.0 | 2 | 700 | 29OCT2020 09:53 | LY3819253 700mg IV           |
| 10201008 | 11818965062 | G8_11818965062_324019w_CG8.fastq.gz   | R237K   | 3.442  | 2266.0 | 3565.4875239923200 | 4.94 | NPH | 7.0 | 2 | 700 | 29OCT2020 09:53 | LY3819253 700mg IV           |
| 10201008 | 11818965062 | G8_11818965062_324019w_CG8.fastq.gz   | H245Y   | 2.612  | 2182.0 | 3565.4875239923200 | 4.94 | NPH | 7.0 | 2 | 700 | 29OCT2020 09:53 | LY3819253 700mg IV           |
| 10201008 | 11818965062 | G8_11818965062_324019w_CG8.fastq.gz   | F306S   | 1.666  | 3361.0 | 3565.4875239923200 | 4.94 | NPH | 7.0 | 2 | 700 | 29OCT2020 09:53 | LY3819253 700mg IV           |
| 10201008 | 11818965062 | G8_11818965062_324019w_CG8.fastq.gz   | E309_   | 2.151  | 3533.0 | 3565.4875239923200 | 4.94 | NPH | 7.0 | 2 | 700 | 29OCT2020 09:53 | LY3819253 700mg IV           |
| 10201008 | 11818965062 | G8_11818965062_324019w_CG8.fastq.gz   | V320A   | 2.284  | 4071.0 | 3565.4875239923200 | 4.94 | NPH | 7.0 | 2 | 700 | 29OCT2020 09:53 | LY3819253 700mg IV           |
| 10201008 | 11818965062 | G8_11818965062_324019w_CG8.fastq.gz   | G416R   | 2.707  | 8348.0 | 3565.4875239923200 | 4.94 | NPH | 7.0 | 2 | 700 | 29OCT2020 09:53 | LY3819253 700mg IV           |
| 10171003 | 11833639944 | B8_11833639944_324019w_CB8.fastq.gz   | F456V   | 8.523  | 2241.0 | 2366.5525672371600 | 2.89 | NPH | 7.0 | 2 | 700 | 21OCT2020 10:15 | LY3819253 700mg IV           |
| 10171003 | 11833639944 | B8_11833639944_324019w_CB8.fastq.gz   | S459F   | 6.299  | 2445.0 | 2366.5525672371600 | 2.89 | NPH | 7.0 | 2 | 700 | 21OCT2020 10:15 | LY3819253 700mg IV           |
| 10171003 | 11833639944 | B8_11833639944_324019w_CB8.fastq.gz   | S721G   | 9.807  | 724.0  | 2366.5525672371600 | 2.89 | NPH | 7.0 | 2 | 700 | 21OCT2020 10:15 | LY3819253 700mg IV           |
| 10171003 | 11833639944 | B8_11833639944_324019w_CB8.fastq.gz   | K786R   | 4.355  | 597.0  | 2366.5525672371600 | 2.89 | NPH | 7.0 | 2 | 700 | 21OCT2020 10:15 | LY3819253 700mg IV           |
| 10061005 | 11804195140 | B4_11804195140_324019w_CB4.fastq.gz   | N439I   | 7.449  | 5974.0 | 1877.6145454545500 | 2.67 | NPH | 7.0 | 2 | 700 | 04NOV2020 15:44 | LY3819253 700mg IV           |
| 10061005 | 11804195140 | B4_11804195140_324019w_CB4.fastq.gz   | P463L   | 7.335  | 2236.0 | 1877.6145454545500 | 2.67 | NPH | 7.0 | 2 | 700 | 04NOV2020 15:44 | LY3819253 700mg IV           |
| 10061005 | 11804195140 | B4_11804195140_324019w_CB4.fastq.gz   | F565L   | 5.974  | 1406.0 | 1877.6145454545500 | 2.67 | NPH | 7.0 | 2 | 700 | 04NOV2020 15:44 | LY3819253 700mg IV           |
| 10061005 | 11804195140 | B4_11804195140_324019w_CB4.fastq.gz   | I666del | 2.083  | 816.0  | 1877.6145454545500 | 2.67 | NPH | 7.0 | 2 | 700 | 04NOV2020 15:44 | LY3819253 700mg IV           |
| 10061005 | 11804195140 | B4_11804195140_324019w_CB4.fastq.gz   | G667del | 2.038  | 834.0  | 1877.6145454545500 | 2.67 | NPH | 7.0 | 2 | 700 | 04NOV2020 15:44 | LY3819253 700mg IV           |
| 10061005 | 11804195140 | B4_11804195140_324019w_CB4.fastq.gz   | A668del | 2.021  | 841.0  | 1877.6145454545500 | 2.67 | NPH | 7.0 | 2 | 700 | 04NOV2020 15:44 | LY3819253 700mg IV           |
| 10061005 | 11804195140 | B4_11804195140_324019w_CB4.fastq.gz   | G669del | 2.031  | 837.0  | 1877.6145454545500 | 2.67 | NPH | 7.0 | 2 | 700 | 04NOV2020 15:44 | LY3819253 700mg IV           |
| 10061005 | 11804195140 | B4_11804195140_324019w_CB4.fastq.gz   | I670del | 2.076  | 819.0  | 1877.6145454545500 | 2.67 | NPH | 7.0 | 2 | 700 | 04NOV2020 15:44 | LY3819253 700mg IV           |
| 10061005 | 11804195140 | B4_11804195140_324019w_CB4.fastq.gz   | C671del | 2.046  | 831.0  | 1877.6145454545500 | 2.67 | NPH | 7.0 | 2 | 700 | 04NOV2020 15:44 | LY3819253 700mg IV           |
| 10061005 | 11804195140 | B4_11804195140_324019w_CB4.fastq.gz   | T732I   | 6.122  | 539.0  | 1877.6145454545500 | 2.67 | NPH | 7.0 | 2 | 700 | 04NOV2020 15:44 | LY3819253 700mg IV           |
| 10061005 | 11804195140 | B4_11804195140_324019w_CB4.fastq.gz   | T739I   | 8.907  | 494.0  | 1877.6145454545500 | 2.67 | NPH | 7.0 | 2 | 700 | 04NOV2020 15:44 | LY3819253 700mg IV           |
| 10061005 | 11804195140 | B4_11804195140_324019w_CB4.fastq.gz   | K786R   | 2.534  | 592.0  | 1877.6145454545500 | 2.67 | NPH | 7.0 | 2 | 700 | 04NOV2020 15:44 | LY3819253 700mg IV           |
| 10311014 | 11841956550 | H1_11841956550_324019w_CH1.fastq.gz   | K786R   | 1.66   | 1024.0 | 1901.1800486618000 | 3.4  | NAS | 7.0 | 2 | 700 | 25NOV2020 07:20 | Placebo for LY3819253 700 mg |
| 10011017 | 11852440390 | A12_11852440390_324019w_CA12.fastq.gz | A522T   | 7.264  | 3951.0 | 3731.798534798540  | 2.38 | NPH | 7.0 | 2 | 700 | 10NOV2020 11:10 | LY3819253 700mg IV           |
| 10011017 | 11852440390 | A12_11852440390_324019w_CA12.fastq.gz | T553I   | 7.341  | 2806.0 | 3731.798534798540  | 2.38 | NPH | 7.0 | 2 | 700 | 10NOV2020 11:10 | LY3819253 700mg IV           |
| 10011017 | 11852440390 | A12_11852440390_324019w_CA12.fastq.gz | P631L   | 6.006  | 2098.0 | 3731.798534798540  | 2.38 | NPH | 7.0 | 2 | 700 | 10NOV2020 11:10 | LY3819253 700mg IV           |
| 10011017 | 11852440390 | A12_11852440390_324019w_CA12.fastq.gz | H655Y   | 7.736  | 2107.0 | 3731.798534798540  | 2.38 | NPH | 7.0 | 2 | 700 | 10NOV2020 11:10 | LY3819253 700mg IV           |
| 10011017 | 11852440390 | A12_11852440390_324019w_CA12.fastq.gz | T716I   | 4.228  | 2294.0 | 3731.798534798540  | 2.38 | NPH | 7.0 | 2 | 700 | 10NOV2020 11:10 | LY3819253 700mg IV           |
| 10251008 | 11818906630 | 17_11818906630_323283w_CF3.fastq.gz   | E484Q   | 6.263  | 495.0  | 546.5413711583920  | 7.13 | NPH | 7.0 | 2 | 700 | 02NOV2020 11:19 | LY3819253 700mg IV           |
| 10251008 | 11818906630 | 17_11818906630_323283w_CF3.fastq.gz   | V785L   | 1.288  | 466.0  | 546.5413711583920  | 7.13 | NPH | 7.0 | 2 | 700 | 02NOV2020 11:19 | LY3819253 700mg IV           |
| 10251008 | 11818906630 | 17_11818906630_323283w_CF3.fastq.gz   | E819del | 6.25   | 16.0   | 546.5413711583920  | 7.13 | NPH | 7.0 | 2 | 700 | 02NOV2020 11:19 | LY3819253 700mg IV           |
| 10251008 | 11818906630 | 17_11818906630_323283w_CF3.fastq.gz   | L822del | 6.25   | 16.0   | 546.5413711583920  | 7.13 | NPH | 7.0 | 2 | 700 | 02NOV2020 11:19 | LY3819253 700mg IV           |
| 10251008 | 11818906630 | 17_11818906630_323283w_CF3.fastq.gz   | G838D   | 5.0    | 20.0   | 546.5413711583920  | 7.13 | NPH | 7.0 | 2 | 700 | 02NOV2020 11:19 | LY3819253 700mg IV           |
| 10511010 | 11800096262 | 36_11800096262_323283w_CG10.fastq.gz  | H49Y    | 3.383  | 1330.0 | 615.9415971394520  | 3.33 | NPH | 7.0 | 2 | 700 | 30OCT2020 09:56 | Placebo for LY3819253 700 mg |
| 10511010 | 11800096262 | 36_11800096262_323283w_CG10.fastq.gz  | F59V    | 1.619  | 988.0  | 615.9415971394520  | 3.33 | NPH | 7.0 | 2 | 700 | 30OCT2020 09:56 | Placebo for LY3819253 700 mg |
| 10511010 | 11800096262 | 36_11800096262_323283w_CG10.fastq.gz  | V83A    | 1.842  | 760.0  | 615.9415971394520  | 3.33 | NPH | 7.0 | 2 | 700 | 30OCT2020 09:56 | Placebo for LY3819253 700 mg |
| 10511010 | 11800096262 | 36_11800096262_323283w_CG10.fastq.gz  | T95I    | 4.539  | 661.0  | 615.9415971394520  | 3.33 | NPH | 7.0 | 2 | 700 | 30OCT2020 09:56 | Placebo for LY3819253 700 mg |
| 10511010 | 11800096262 | 36_11800096262_323283w_CG10.fastq.gz  | L118F   | 2.883  | 555.0  | 615.9415971394520  | 3.33 | NPH | 7.0 | 2 | 700 | 30OCT2020 09:56 | Placebo for LY3819253 700 mg |
| 10511010 | 11800096262 | 36_11800096262_323283w_CG10.fastq.gz  | S151I   | 4.067  | 541.0  | 615.9415971394520  | 3.33 | NPH | 7.0 | 2 |     |                 |                              |

|          |             |                                       |         |        |        |                    |      |     |     |   |       |                 |                              |
|----------|-------------|---------------------------------------|---------|--------|--------|--------------------|------|-----|-----|---|-------|-----------------|------------------------------|
| 10511010 | 11800096262 | 36_11800096262_323283w_CG10.fastq.gz  | Q644_   | 3.855  | 441.0  | 615.9415971394520  | 3.33 | NPH | 7.0 | 2 | 700   | 30OCT2020 09:56 | Placebo for LY3819253 700 mg |
| 10511010 | 11800096262 | 36_11800096262_323283w_CG10.fastq.gz  | A694S   | 1.279  | 391.0  | 615.9415971394520  | 3.33 | NPH | 7.0 | 2 | 700   | 30OCT2020 09:56 | Placebo for LY3819253 700 mg |
| 10511010 | 11800096262 | 36_11800096262_323283w_CG10.fastq.gz  | L699F   | 2.122  | 377.0  | 615.9415971394520  | 3.33 | NPH | 7.0 | 2 | 700   | 30OCT2020 09:56 | Placebo for LY3819253 700 mg |
| 10511010 | 11800096262 | 36_11800096262_323283w_CG10.fastq.gz  | L752P   | 2.92   | 274.0  | 615.9415971394520  | 3.33 | NPH | 7.0 | 2 | 700   | 30OCT2020 09:56 | Placebo for LY3819253 700 mg |
| 10511010 | 11800096262 | 36_11800096262_323283w_CG10.fastq.gz  | R765C   | 3.371  | 178.0  | 615.9415971394520  | 3.33 | NPH | 7.0 | 2 | 700   | 30OCT2020 09:56 | Placebo for LY3819253 700 mg |
| 10511010 | 11800096262 | 36_11800096262_323283w_CG10.fastq.gz  | S803L   | 2.17   | 507.0  | 615.9415971394520  | 3.33 | NPH | 7.0 | 2 | 700   | 30OCT2020 09:56 | Placebo for LY3819253 700 mg |
| 10511008 | 11800030478 | 34_11800030478_323283w_CG8.fastq.gz   | F32L    | 1.091  | 1650.0 | 548.3926380368100  | 2.42 | NPH | 7.0 | 2 | 700   | 30OCT2020 15:01 | LY3819253 700mg IV           |
| 10511008 | 11800030478 | 34_11800030478_323283w_CG8.fastq.gz   | D198Y   | 12.891 | 512.0  | 548.3926380368100  | 2.42 | NPH | 7.0 | 2 | 700   | 30OCT2020 15:01 | LY3819253 700mg IV           |
| 10511008 | 11800030478 | 34_11800030478_323283w_CG8.fastq.gz   | Y495H   | 15.126 | 476.0  | 548.3926380368100  | 2.42 | NPH | 7.0 | 2 | 700   | 30OCT2020 15:01 | LY3819253 700mg IV           |
| 10331007 | 11856705156 | A2_11856705156_323690w_BA2.fastq.gz   | C136G   | 10.478 | 1947.0 | 2179.1591737545600 | 2.06 | NPH | 7.0 | 2 | 700   | 16NOV2020 08:38 | LY3819253 700mg IV           |
| 10331007 | 11856705156 | A2_11856705156_323690w_BA2.fastq.gz   | P665del | 3.95   | 1291.0 | 2179.1591737545600 | 2.06 | NPH | 7.0 | 2 | 700   | 16NOV2020 08:38 | LY3819253 700mg IV           |
| 10331007 | 11856705156 | A2_11856705156_323690w_BA2.fastq.gz   | l666del | 4.022  | 1268.0 | 2179.1591737545600 | 2.06 | NPH | 7.0 | 2 | 700   | 16NOV2020 08:38 | LY3819253 700mg IV           |
| 10331007 | 11856705156 | A2_11856705156_323690w_BA2.fastq.gz   | F782V   | 1.068  | 936.0  | 2179.1591737545600 | 2.06 | NPH | 7.0 | 2 | 700   | 16NOV2020 08:38 | LY3819253 700mg IV           |
| 10331007 | 11856705156 | A2_11856705156_323690w_BA2.fastq.gz   | A783V   | 1.307  | 918.0  | 2179.1591737545600 | 2.06 | NPH | 7.0 | 2 | 700   | 16NOV2020 08:38 | LY3819253 700mg IV           |
| 10251008 | 11818904076 | E11_11818904076_323690w_BE11.fastq.gz | S494P   | 9.511  | 1861.0 | 1999.1705237515200 | 6.65 | NAS | 7.0 | 2 | 700   | 02NOV2020 11:18 | LY3819253 700mg IV           |
| 10201008 | 11818966596 | A3_11818966596_323692w_NA3.fastq.gz   | Q493R   | 1.891  | 2908.0 | 2825.307317073170  | 4.97 | NAS | 7.0 | 2 | 700   | 29OCT2020 09:52 | LY3819253 700mg IV           |
| 10201011 | 11818966598 | A8_11818966598_323692w_NA8.fastq.gz   | L141del | 2.18   | 2706.0 | 3105.50488997555   | 2.99 | NAS | 7.0 | 2 | 700   | 03NOV2020 08:22 | Placebo for LY3819253 700 mg |
| 10201011 | 11818966598 | A8_11818966598_323692w_NA8.fastq.gz   | G142del | 2.237  | 2638.0 | 3105.50488997555   | 2.99 | NAS | 7.0 | 2 | 700   | 03NOV2020 08:22 | Placebo for LY3819253 700 mg |
| 10201011 | 11818966598 | A8_11818966598_323692w_NA8.fastq.gz   | A783V   | 1.079  | 834.0  | 3105.50488997555   | 2.99 | NAS | 7.0 | 2 | 700   | 03NOV2020 08:22 | Placebo for LY3819253 700 mg |
| 10121008 | 11804194624 | 27_11804194624_323231w_NC3.fastq.gz   | H207Y   | 1.321  | 1363.0 | 1426.5054811205800 | 3.59 | NPH | 7.0 | 2 | 700   | 13NOV2020 09:28 | LY3819253 700mg IV           |
| 10121008 | 11804194624 | 27_11804194624_323231w_NC3.fastq.gz   | R328S   | 1.361  | 1396.0 | 1426.5054811205800 | 3.59 | NPH | 7.0 | 2 | 700   | 13NOV2020 09:28 | LY3819253 700mg IV           |
| 10121008 | 11804194624 | 27_11804194624_323231w_NC3.fastq.gz   | A352V   | 1.01   | 1485.0 | 1426.5054811205800 | 3.59 | NPH | 7.0 | 2 | 700   | 13NOV2020 09:28 | LY3819253 700mg IV           |
| 10121008 | 11804194624 | 27_11804194624_323231w_NC3.fastq.gz   | V395F   | 1.179  | 1442.0 | 1426.5054811205800 | 3.59 | NPH | 7.0 | 2 | 700   | 13NOV2020 09:28 | LY3819253 700mg IV           |
| 10121008 | 11804194624 | 27_11804194624_323231w_NC3.fastq.gz   | Q409_   | 1.099  | 1456.0 | 1426.5054811205800 | 3.59 | NPH | 7.0 | 2 | 700   | 13NOV2020 09:28 | LY3819253 700mg IV           |
| 10121008 | 11804194624 | 27_11804194624_323231w_NC3.fastq.gz   | S459P   | 1.231  | 1462.0 | 1426.5054811205800 | 3.59 | NPH | 7.0 | 2 | 700   | 13NOV2020 09:28 | LY3819253 700mg IV           |
| 10121008 | 11804194624 | 27_11804194624_323231w_NC3.fastq.gz   | S530F   | 1.128  | 1330.0 | 1426.5054811205800 | 3.59 | NPH | 7.0 | 2 | 700   | 13NOV2020 09:28 | LY3819253 700mg IV           |
| 10121008 | 11804194624 | 27_11804194624_323231w_NC3.fastq.gz   | T719I   | 1.083  | 739.0  | 1426.5054811205800 | 3.59 | NPH | 7.0 | 2 | 700   | 13NOV2020 09:28 | LY3819253 700mg IV           |
| 10011021 | 11854554380 | 34_11854554380_323231w_NC10.fastq.gz  | L629I   | 10.201 | 1794.0 | 2264.1365313653100 | 2.68 | NPH | 7.0 | 2 | 700   | 16NOV2020 09:26 | Placebo for LY3819253 700 mg |
| 10031022 | 11816853446 | 30_11816853446_323231w_NC6.fastq.gz   | P665del | 1.004  | 1096.0 | 1865.6658595641600 | 5.52 | NPH | 7.0 | 2 | 700   | 09NOV2020 10:58 | Placebo for LY3819253 700 mg |
| 10031022 | 11816853446 | 30_11816853446_323231w_NC6.fastq.gz   | G667del | 1.538  | 1105.0 | 1865.6658595641600 | 5.52 | NPH | 7.0 | 2 | 700   | 09NOV2020 10:58 | Placebo for LY3819253 700 mg |
| 10031022 | 11816853446 | 30_11816853446_323231w_NC6.fastq.gz   | A668del | 1.565  | 1086.0 | 1865.6658595641600 | 5.52 | NPH | 7.0 | 2 | 700   | 09NOV2020 10:58 | Placebo for LY3819253 700 mg |
| 10031022 | 11816853446 | 30_11816853446_323231w_NC6.fastq.gz   | G669del | 1.512  | 1058.0 | 1865.6658595641600 | 5.52 | NPH | 7.0 | 2 | 700   | 09NOV2020 10:58 | Placebo for LY3819253 700 mg |
| 10031022 | 11816853446 | 30_11816853446_323231w_NC6.fastq.gz   | l670del | 1.371  | 1021.0 | 1865.6658595641600 | 5.52 | NPH | 7.0 | 2 | 700   | 09NOV2020 10:58 | Placebo for LY3819253 700 mg |
| 10031022 | 11816853446 | 30_11816853446_323231w_NC6.fastq.gz   | C671del | 1.239  | 1049.0 | 1865.6658595641600 | 5.52 | NPH | 7.0 | 2 | 700   | 09NOV2020 10:58 | Placebo for LY3819253 700 mg |
| 10031022 | 11816853446 | 30_11816853446_323231w_NC6.fastq.gz   | A672del | 1.137  | 1055.0 | 1865.6658595641600 | 5.52 | NPH | 7.0 | 2 | 700   | 09NOV2020 10:58 | Placebo for LY3819253 700 mg |
| 10131007 | 11850408967 | 58_11850408967_323231w_NE10.fastq.gz  | G252V   | 1.288  | 2639.0 | 3045.848894348890  | 2.25 | NPH | 7.0 | 2 | 700   | 30OCT2020 10:17 | Placebo for LY3819253 700 mg |
| 10201019 | 11812673870 | 43_11812673870_323231w_ND7.fastq.gz   | H245Y   | 7.327  | 1283.0 | 1406.3644171779100 | 3.18 | NPH | 7.0 | 2 | 700   | 12NOV2020 11:02 | LY3819253 700mg IV           |
| 10201019 | 11812673870 | 43_11812673870_323231w_ND7.fastq.gz   | S254F   | 12.081 | 1283.0 | 1406.3644171779100 | 3.18 | NPH | 7.0 | 2 | 700   | 12NOV2020 11:02 | LY3819253 700mg IV           |
| 10221006 | 11839866636 | 31_11839866636_323231w_NC7.fastq.gz   | F186L   | 1.473  | 3801.0 | 3721.189024390240  | 3.21 | NPH | 7.0 | 2 | 700   | 03NOV2020 08:52 | LY3819253 700mg IV           |
| 10331006 | 11816864201 | 37_11816864201_323231w_ND1.fastq.gz   | M1I     | 15.578 | 3383.0 | 1528.8815628815600 | 2.09 | NPH | 7.0 | 2 | 700   | 12NOV2020 15:43 | LY3819253 700mg IV           |
| 10331006 | 11816864201 | 37_11816864201_323231w_ND1.fastq.gz   | A575V   | 15.94  | 1399.0 | 1528.8815628815600 | 2.09 | NPH | 7.0 | 2 | 700   | 12NOV2020 15:43 | LY3819253 700mg IV           |
| 10331006 | 11816864201 | 37_11816864201_323231w_ND1.fastq.gz   | S704L   | 11.438 | 953.0  | 1528.8815628815600 | 2.09 | NPH | 7.0 | 2 | 700   | 12NOV2020 15:43 | LY3819253 700mg IV           |
| 10331006 | 11816864201 | 37_11816864201_323231w_ND1.fastq.gz   | L752F   | 11.316 | 380.0  | 1528.8815628815600 | 2.09 | NPH | 7.0 | 2 | 700   | 12NOV2020 15:43 | LY3819253 700mg IV           |
| 10201013 | 11850403329 | 15_11850403329_323231w_NB3.fastq.gz   | Q271_   | 10.651 | 967.0  | 1008.0822085889600 | 2.96 | NPH | 7.0 | 2 | 700   | 05NOV2020 11:32 | LY3819253 700mg IV           |
| 10201013 | 11850403329 | 15_11850403329_323231w_NB3.fastq.gz   | R683W   | 1.005  | 597.0  | 1008.0822085889600 | 2.96 | NPH | 7.0 | 2 | 700   | 05NOV2020 11:32 | LY3819253 700mg IV           |
| 10201013 | 11850403329 | 15_11850403329_323231w_NB3.fastq.gz   | A706P   | 14.413 | 562.0  | 1008.0822085889600 | 2.96 | NPH | 7.0 | 2 | 700   | 05NOV2020 11:32 | LY3819253 700mg IV           |
| 10081006 | 11837818185 | 49_11837818185_323231w_NE1.fastq.gz   | P57S    | 5.223  | 3312.0 | 1470.0722154222800 | 2.75 | NPH | 7.0 | 2 | 700   | 05NOV2020 07:57 | LY3819253 700mg IV           |
| 10081006 | 11837818185 | 49_11837818185_323231w_NE1.fastq.gz   | Q271_   | 6.546  | 1329.0 | 1470.0722154222800 | 2.75 | NPH | 7.0 | 2 | 700   | 05NOV2020 07:57 | LY3819253 700mg IV           |
| 10081006 | 11837818185 | 49_11837818185_323231w_NE1.fastq.gz   | N544I   | 5.358  | 1325.0 | 1470.0722154222800 | 2.75 | NPH | 7.0 | 2 | 700   | 05NOV2020 07:57 | LY3819253 700mg IV           |
| 10081006 | 11837818185 | 49_11837818185_323231w_NE1.fastq.gz   | R685C   | 6.342  | 946.0  | 1470.0722154222800 | 2.75 | NPH | 7.0 | 2 | 700   | 05NOV2020 07:57 | LY3819253 700mg IV           |
| 10081006 | 11837818185 | 49_11837818185_323231w_NE1.fastq.gz   | S708F   | 6.222  | 884.0  | 1470.0722154222800 | 2.75 | NPH | 7.0 | 2 | 700   | 05NOV2020 07:57 | LY3819253 700mg IV           |
| 10201018 | 11846161924 | 39_11846161924_323231w_ND3.fastq.gz   | W64L    | 1.023  | 2836.0 | 1507.5253012048200 | 4.35 | NPH | 7.0 | 2 | 700   | 13NOV2020 09:52 | LY3819253 700mg IV           |
| 10201018 | 11846161924 | 39_11846161924_323231w_ND3.fastq.gz   | T108N   | 1.435  | 1672.0 | 1507.5253012048200 | 4.35 | NPH | 7.0 | 2 | 700   | 13NOV2020 09:52 | LY3819253 700mg IV           |
| 10201018 | 11846161924 | 39_11846161924_323231w_ND3.fastq.gz   | Y279N   | 1.225  | 1388.0 | 1507.5253012048200 | 4.35 | NPH | 7.0 | 2 | 700   | 13NOV2020 09:52 | LY3819253 700mg IV           |
| 10201018 | 11846161924 | 39_11846161924_323231w_ND3.fastq.gz   | L296F   | 1.067  | 1500.0 | 1507.5253012048200 | 4.35 | NPH | 7.0 | 2 | 700   | 13NOV2020 09:52 | LY3819253 700mg IV           |
| 10201018 | 11846161924 | 39_11846161924_323231w_ND3.fastq.gz   | S375F   | 1.097  | 1367.0 | 1507.5253012048200 | 4.35 | NPH | 7.0 | 2 | 700   | 13NOV2020 09:52 | LY3819253 700mg IV           |
| 10201018 | 11846161924 | 39_11846161924_323231w_ND3.fastq.gz   | Q414_   | 1.298  | 1541.0 | 1507.5253012048200 | 4.35 | NPH | 7.0 | 2 | 700   | 13NOV2020 09:52 | LY3819253 700mg IV           |
| 10201018 | 11846161924 | 39_11846161924_323231w_ND3.fastq.gz   | R457S   | 2.535  | 1578.0 | 1507.5253012048200 | 4.35 | NPH | 7.0 | 2 | 700   | 13NOV2020 09:52 | LY3819253 700mg IV           |
| 10201018 | 11846161924 | 39_11846161924_323231w_ND3.fastq.gz   | P463S   | 1.102  | 1543.0 | 1507.5253012048200 | 4.35 | NPH | 7.0 | 2 | 700   | 13NOV2020 09:52 | LY3819253 700mg IV           |
| 10201018 | 11846161924 | 39_11846161924_323231w_ND3.fastq.gz   | P507S   | 1.344  | 1563.0 | 1507.5253012048200 | 4.35 | NPH | 7.0 | 2 | 700   | 13NOV2020 09:52 | LY3819253 700mg IV           |
| 10201018 | 11846161924 | 39_11846161924_323231w_ND3.fastq.gz   | H519N   | 1.682  | 1486.0 | 1507.5253012048200 | 4.35 | NPH | 7.0 | 2 | 700   | 13NOV2020 09:52 | LY3819253 700mg IV           |
| 10201018 | 11846161924 | 39_11846161924_323231w_ND3.fastq.gz   | A522P   | 1.648  | 1456.0 | 1507.5253012048200 | 4.35 | NPH | 7.0 | 2 | 700   | 13NOV2020 09:52 | LY3819253 700mg IV           |
| 10201018 | 11846161924 | 39_11846161924_323231w_ND3.fastq.gz   | A522V   | 1.168  | 1456.0 | 1507.5253012048200 | 4.35 | NPH | 7.0 | 2 | 700   | 13NOV2020 09:52 | LY3819253 700mg IV           |
| 10201018 | 11846161924 | 39_11846161924_323231w_ND3.fastq.gz   | P589S   | 1.065  | 1314.0 | 1507.5253012048200 | 4.35 | NPH | 7.0 | 2 | 700</ |                 |                              |

|          |             |                                      |         |        |         |                    |      |     |     |   |     |                 |                              |
|----------|-------------|--------------------------------------|---------|--------|---------|--------------------|------|-----|-----|---|-----|-----------------|------------------------------|
| 10041005 | 11835718983 | 21_11835718983_323231w_NB9.fastq.gz  | L517I   | 1.081  | 1573.0  | 1657.344701583440  | 3.41 | NPH | 7.0 | 2 | 700 | 06NOV2020 11:30 | Placebo for LY3819253 700 mg |
| 10041005 | 11835718983 | 21_11835718983_323231w_NB9.fastq.gz  | L552F   | 1.001  | 1498.0  | 1657.344701583440  | 3.41 | NPH | 7.0 | 2 | 700 | 06NOV2020 11:30 | Placebo for LY3819253 700 mg |
| 10041005 | 11835718983 | 21_11835718983_323231w_NB9.fastq.gz  | Q563S   | 1.091  | 1466.0  | 1657.344701583440  | 3.41 | NPH | 7.0 | 2 | 700 | 06NOV2020 11:30 | Placebo for LY3819253 700 mg |
| 10041005 | 11835718983 | 21_11835718983_323231w_NB9.fastq.gz  | Q675_   | 1.031  | 970.0   | 1657.344701583440  | 3.41 | NPH | 7.0 | 2 | 700 | 06NOV2020 11:30 | Placebo for LY3819253 700 mg |
| 10041005 | 11835718983 | 21_11835718983_323231w_NB9.fastq.gz  | C743R   | 1.807  | 498.0   | 1657.344701583440  | 3.41 | NPH | 7.0 | 2 | 700 | 06NOV2020 11:30 | Placebo for LY3819253 700 mg |
| 10041005 | 11835718983 | 21_11835718983_323231w_NB9.fastq.gz  | S746L   | 1.522  | 460.0   | 1657.344701583440  | 3.41 | NPH | 7.0 | 2 | 700 | 06NOV2020 11:30 | Placebo for LY3819253 700 mg |
| 10441002 | 11854609667 | 14_11854609667_tNTD_S1_S1S2_t_323691 | F400V   | 1.086  | 5433.0  | 3425.4920634920600 | 2.16 | NPH | 7.0 | 2 | 700 | 19NOV2020 10:22 | LY3819253 700mg IV           |
| 10441002 | 11854609667 | 14_11854609667_tNTD_S1_S1S2_t_323691 | V401G   | 1.22   | 5493.0  | 3425.4920634920600 | 2.16 | NPH | 7.0 | 2 | 700 | 19NOV2020 10:22 | LY3819253 700mg IV           |
| 10441002 | 11854609667 | 14_11854609667_tNTD_S1_S1S2_t_323691 | Q474R   | 2.483  | 4188.0  | 3425.4920634920600 | 2.16 | NPH | 7.0 | 2 | 700 | 19NOV2020 10:22 | LY3819253 700mg IV           |
| 10051004 | 11802170694 | 27_11802170694_323555w_BC3.fastq.gz  | D138H   | 99.927 | 1378.0  | 1640.7295980511600 | 6.85 | NAS | 8.0 | 2 | 700 | 27OCT2020 22:30 | LY3819253 700mg IV           |
| 10051004 | 11802170694 | 27_11802170694_323555w_BC3.fastq.gz  | E484K   | 99.929 | 1412.0  | 1640.7295980511600 | 6.85 | NAS | 8.0 | 2 | 700 | 27OCT2020 22:30 | LY3819253 700mg IV           |
| 10051004 | 11802170694 | 27_11802170694_323555w_BC3.fastq.gz  | D614G   | 99.664 | 1192.0  | 1640.7295980511600 | 6.85 | NAS | 8.0 | 2 | 700 | 27OCT2020 22:30 | LY3819253 700mg IV           |
| 10021004 | 11800003650 | 8_11800003650_323555w_BA8.fastq.gz   | L141del | 100.0  | 12.0    | 1320.1807081807100 | 6.55 | NAS | 8.0 | 2 | 700 | 27OCT2020 21:00 | LY3819253 700mg IV           |
| 10021004 | 11800003650 | 8_11800003650_323555w_BA8.fastq.gz   | G142del | 100.0  | 758.0   | 1320.1807081807100 | 6.55 | NAS | 8.0 | 2 | 700 | 27OCT2020 21:00 | LY3819253 700mg IV           |
| 10021004 | 11800003650 | 8_11800003650_323555w_BA8.fastq.gz   | V143del | 100.0  | 746.0   | 1320.1807081807100 | 6.55 | NAS | 8.0 | 2 | 700 | 27OCT2020 21:00 | LY3819253 700mg IV           |
| 10021004 | 11800003650 | 8_11800003650_323555w_BA8.fastq.gz   | S254F   | 100.0  | 1035.0  | 1320.1807081807100 | 6.55 | NAS | 8.0 | 2 | 700 | 27OCT2020 21:00 | LY3819253 700mg IV           |
| 10021004 | 11800003650 | 8_11800003650_323555w_BA8.fastq.gz   | E484K   | 99.632 | 1087.0  | 1320.1807081807100 | 6.55 | NAS | 8.0 | 2 | 700 | 27OCT2020 21:00 | LY3819253 700mg IV           |
| 10021004 | 11800003650 | 8_11800003650_323555w_BA8.fastq.gz   | D614G   | 100.0  | 926.0   | 1320.1807081807100 | 6.55 | NAS | 8.0 | 2 | 700 | 27OCT2020 21:00 | LY3819253 700mg IV           |
| 10011015 | 11839854155 | D1_11839854155_323524w_BD1.fastq.gz  | T63N    | 97.288 | 1733.0  | 967.4276960784310  | 3.51 | NAS | 8.0 | 2 | 700 | 04NOV2020 07:30 | LY3819253 700mg IV           |
| 10011015 | 11839854155 | D1_11839854155_323524w_BD1.fastq.gz  | E484K   | 100.0  | 1013.0  | 967.4276960784310  | 3.51 | NAS | 8.0 | 2 | 700 | 04NOV2020 07:30 | LY3819253 700mg IV           |
| 10011015 | 11839854155 | D1_11839854155_323524w_BD1.fastq.gz  | D614G   | 100.0  | 750.0   | 967.4276960784310  | 3.51 | NAS | 8.0 | 2 | 700 | 04NOV2020 07:30 | LY3819253 700mg IV           |
| 10311014 | 11812597189 | B7_11812597189_323690w_BB7.fastq.gz  | D614G   | 99.628 | 1345.0  | 1656.2843137254900 | 4.63 | NAS | 8.0 | 2 | 700 | 26NOV2020 09:00 | Placebo for LY3819253 700 mg |
| 10221006 | 11820972230 | E6_11820972230_323692w_NE6.fastq.gz  | S13I    | 99.884 | 7729.0  | 2424.867878787880  | 2.9  | NAS | 8.0 | 2 | 700 | 04NOV2020 18:30 | LY3819253 700mg IV           |
| 10221006 | 11820972230 | E6_11820972230_323692w_NE6.fastq.gz  | W152C   | 100.0  | 2125.0  | 2424.867878787880  | 2.9  | NAS | 8.0 | 2 | 700 | 04NOV2020 18:30 | LY3819253 700mg IV           |
| 10221006 | 11820972230 | E6_11820972230_323692w_NE6.fastq.gz  | L452R   | 99.844 | 2557.0  | 2424.867878787880  | 2.9  | NAS | 8.0 | 2 | 700 | 04NOV2020 18:30 | LY3819253 700mg IV           |
| 10221006 | 11820972230 | E6_11820972230_323692w_NE6.fastq.gz  | S494L   | 71.733 | 2395.0  | 2424.867878787880  | 2.9  | NAS | 8.0 | 2 | 700 | 04NOV2020 18:30 | LY3819253 700mg IV           |
| 10221006 | 11820972230 | E6_11820972230_323692w_NE6.fastq.gz  | D614G   | 99.927 | 1377.0  | 2424.867878787880  | 2.9  | NAS | 8.0 | 2 | 700 | 04NOV2020 18:30 | LY3819253 700mg IV           |
| 10221006 | 11820972230 | E6_11820972230_323692w_NE6.fastq.gz  | K814M   | 50.0   | 2.0     | 2424.867878787880  | 2.9  | NAS | 8.0 | 2 | 700 | 04NOV2020 18:30 | LY3819253 700mg IV           |
| 10051009 | 11808475852 | D9_11808475852_323692w_ND9.fastq.gz  | E484K   | 99.959 | 2429.0  | 2504.4280487804900 | 3.42 | NAS | 8.0 | 2 | 700 | 21NOV2020 19:00 | LY3819253 700mg IV           |
| 10051009 | 11808475852 | D9_11808475852_323692w_ND9.fastq.gz  | D614G   | 99.783 | 1845.0  | 2504.4280487804900 | 3.42 | NAS | 8.0 | 2 | 700 | 21NOV2020 19:00 | LY3819253 700mg IV           |
| 10251008 | 11839934913 | C2_11839934913_323692w_NC2.fastq.gz  | E484K   | 97.023 | 2385.0  | 2286.6004872107200 | 6.78 | NAS | 8.0 | 2 | 700 | 03NOV2020 16:48 | LY3819253 700mg IV           |
| 10251008 | 11839934913 | C2_11839934913_323692w_NC2.fastq.gz  | D614G   | 99.495 | 1981.0  | 2286.6004872107200 | 6.78 | NAS | 8.0 | 2 | 700 | 03NOV2020 16:48 | LY3819253 700mg IV           |
| 10051004 | 11802170694 | 27_11802170694_323555w_BC3.fastq.gz  | F43T    | 4.657  | 2942.0  | 1640.7295980511600 | 6.85 | NAS | 8.0 | 2 | 700 | 27OCT2020 22:30 | LY3819253 700mg IV           |
| 10051004 | 11802170694 | 27_11802170694_323555w_BC3.fastq.gz  | Y674F   | 1.021  | 1273.0  | 1640.7295980511600 | 6.85 | NAS | 8.0 | 2 | 700 | 27OCT2020 22:30 | LY3819253 700mg IV           |
| 10051004 | 11802170694 | 27_11802170694_323555w_BC3.fastq.gz  | S735_   | 1.98   | 2071.0  | 1640.7295980511600 | 6.85 | NAS | 8.0 | 2 | 700 | 27OCT2020 22:30 | LY3819253 700mg IV           |
| 10021004 | 11800003650 | 8_11800003650_323555w_BA8.fastq.gz   | S686R   | 1.385  | 1083.0  | 1320.1807081807100 | 6.55 | NAS | 8.0 | 2 | 700 | 27OCT2020 21:00 | LY3819253 700mg IV           |
| 10021004 | 11800003650 | 8_11800003650_323555w_BA8.fastq.gz   | M731V   | 1.055  | 853.0   | 1320.1807081807100 | 6.55 | NAS | 8.0 | 2 | 700 | 27OCT2020 21:00 | LY3819253 700mg IV           |
| 10011015 | 11839854155 | D1_11839854155_323524w_BD1.fastq.gz  | Q564_   | 1.932  | 880.0   | 967.4276960784310  | 3.51 | NAS | 8.0 | 2 | 700 | 04NOV2020 07:30 | LY3819253 700mg IV           |
| 10011015 | 11839854155 | D1_11839854155_323524w_BD1.fastq.gz  | T716P   | 1.793  | 502.0   | 967.4276960784310  | 3.51 | NAS | 8.0 | 2 | 700 | 04NOV2020 07:30 | LY3819253 700mg IV           |
| 10311014 | 11812597189 | B7_11812597189_323690w_BB7.fastq.gz  | E132_   | 1.179  | 1442.0  | 1656.2843137254900 | 4.63 | NAS | 8.0 | 2 | 700 | 26NOV2020 09:00 | Placebo for LY3819253 700 mg |
| 10311014 | 11812597189 | B7_11812597189_323690w_BB7.fastq.gz  | G548D   | 1.079  | 1483.0  | 1656.2843137254900 | 4.63 | NAS | 8.0 | 2 | 700 | 26NOV2020 09:00 | Placebo for LY3819253 700 mg |
| 10311014 | 11812597189 | B7_11812597189_323690w_BB7.fastq.gz  | F782V   | 1.073  | 559.0   | 1656.2843137254900 | 4.63 | NAS | 8.0 | 2 | 700 | 26NOV2020 09:00 | Placebo for LY3819253 700 mg |
| 10221006 | 11820972230 | E6_11820972230_323692w_NE6.fastq.gz  | R214H   | 2.475  | 2303.0  | 2424.867878787880  | 2.9  | NAS | 8.0 | 2 | 700 | 04NOV2020 18:30 | LY3819253 700mg IV           |
| 10221006 | 11820972230 | E6_11820972230_323692w_NE6.fastq.gz  | P491S   | 3.71   | 2453.0  | 2424.867878787880  | 2.9  | NAS | 8.0 | 2 | 700 | 04NOV2020 18:30 | LY3819253 700mg IV           |
| 10221006 | 11820972230 | E6_11820972230_323692w_NE6.fastq.gz  | A783V   | 1.427  | 771.0   | 2424.867878787880  | 2.9  | NAS | 8.0 | 2 | 700 | 04NOV2020 18:30 | LY3819253 700mg IV           |
| 10051009 | 11808475852 | D9_11808475852_323692w_ND9.fastq.gz  | G496V   | 2.785  | 2442.0  | 2504.4280487804900 | 3.42 | NAS | 8.0 | 2 | 700 | 21NOV2020 19:00 | LY3819253 700mg IV           |
| 10051009 | 11808475852 | D9_11808475852_323692w_ND9.fastq.gz  | F592S   | 2.754  | 2070.0  | 2504.4280487804900 | 3.42 | NAS | 8.0 | 2 | 700 | 21NOV2020 19:00 | LY3819253 700mg IV           |
| 10051009 | 11808475852 | D9_11808475852_323692w_ND9.fastq.gz  | Q644_   | 3.029  | 1849.0  | 2504.4280487804900 | 3.42 | NAS | 8.0 | 2 | 700 | 21NOV2020 19:00 | LY3819253 700mg IV           |
| 10051009 | 11808475852 | D9_11808475852_323692w_ND9.fastq.gz  | K795T   | 19.289 | 1322.0  | 2504.4280487804900 | 3.42 | NAS | 8.0 | 2 | 700 | 21NOV2020 19:00 | LY3819253 700mg IV           |
| 10051009 | 11808475852 | D9_11808475852_323692w_ND9.fastq.gz  | D796Y   | 18.959 | 1345.0  | 2504.4280487804900 | 3.42 | NAS | 8.0 | 2 | 700 | 21NOV2020 19:00 | LY3819253 700mg IV           |
| 10251008 | 11839934913 | C2_11839934913_323692w_NC2.fastq.gz  | S494P   | 2.688  | 2344.0  | 2286.6004872107200 | 6.78 | NAS | 8.0 | 2 | 700 | 03NOV2020 16:48 | LY3819253 700mg IV           |
| 10051004 | 11802170438 | 20_11802170438_323555w_BB8.fastq.gz  | D138H   | 99.662 | 887.0   | 1294.0706455542000 | 6.73 | NAS | 9.0 | 2 | 700 | 28OCT2020 10:14 | LY3819253 700mg IV           |
| 10051004 | 11802170438 | 20_11802170438_323555w_BB8.fastq.gz  | E484K   | 99.899 | 987.0   | 1294.0706455542000 | 6.73 | NAS | 9.0 | 2 | 700 | 28OCT2020 10:14 | LY3819253 700mg IV           |
| 10051004 | 11802170438 | 20_11802170438_323555w_BB8.fastq.gz  | D614G   | 99.868 | 756.0   | 1294.0706455542000 | 6.73 | NAS | 9.0 | 2 | 700 | 28OCT2020 10:14 | LY3819253 700mg IV           |
| 10051005 | 11802167367 | 28_11802167367_323555w_BC4.fastq.gz  | E484Q   | 99.829 | 1755.0  | 1802.0             | 3.55 | NAS | 9.0 | 2 | 700 | 06NOV2020 19:08 | LY3819253 700mg IV           |
| 10051005 | 11802167367 | 28_11802167367_323555w_BC4.fastq.gz  | D614G   | 100.0  | 1260.0  | 1802.0             | 3.55 | NAS | 9.0 | 2 | 700 | 06NOV2020 19:08 | LY3819253 700mg IV           |
| 10021004 | 11800001353 | 9_11800001353_323555w_BA9.fastq.gz   | G142del | 77.946 | 1120.0  | 1798.6412121212100 | 5.69 | NAS | 9.0 | 2 | 700 | 28OCT2020 22:00 | LY3819253 700mg IV           |
| 10021004 | 11800001353 | 9_11800001353_323555w_BA9.fastq.gz   | V143del | 78.442 | 1104.0  | 1798.6412121212100 | 5.69 | NAS | 9.0 | 2 | 700 | 28OCT2020 22:00 | LY3819253 700mg IV           |
| 10021004 | 11800001353 | 9_11800001353_323555w_BA9.fastq.gz   | S254F   | 99.828 | 1741.0  | 1798.6412121212100 | 5.69 | NAS | 9.0 | 2 | 700 | 28OCT2020 22:00 | LY3819253 700mg IV           |
| 10021004 | 11800001353 | 9_11800001353_323555w_BA9.fastq.gz   | E484K   | 85.123 | 1741.0  | 1798.6412121212100 | 5.69 | NAS | 9.0 | 2 | 700 | 28OCT2020 22:00 | LY3819253 700mg IV           |
| 10021004 | 11800001353 | 9_11800001353_323555w_BA9.fastq.gz   | D614G   | 99.927 | 1376.0  | 1798.6412121212100 | 5.69 | NAS | 9.0 | 2 | 700 | 28OCT2020 22:00 | LY3819253 700mg IV           |
| 10201021 | 11821064393 | H1_11821064393_323524w_BH1.fastq.gz  | D614G   | 100.0  | 1007.0  | 1229.8327183271800 | 2.35 | NAS | 9.0 | 2 | 700 | 23NOV2020 20:30 | Placebo for LY3819253 700 mg |
| 10411001 | 11802109447 | 61_11802109447_323232w_AF1.fastq.gz  | F32L    | 99.9   | 10000.0 | 3739.805491990850  | 4.38 | NAS | 9.0 | 2 | 700 | 15NOV2020 17:40 | Placebo for LY3819253 700 mg |
| 10411001 | 11802109447 | 61_11802109447_323232w_AF1.fastq.gz  | P251S   | 99.923 | 3913.0  | 3739.805491990850  | 4.38 | NAS | 9.0 | 2 | 700 | 15NOV2020 17:40 | Placebo for LY3819253 700 mg |
| 10411001 | 11802109447 |                                      |         |        |         |                    |      |     |     |   |     |                 |                              |

|          |             |                                       |         |        |         |                    |      |     |      |   |     |                 |                              |
|----------|-------------|---------------------------------------|---------|--------|---------|--------------------|------|-----|------|---|-----|-----------------|------------------------------|
| 10051005 | 11802167367 | 28_11802167367_323555w_BC4.fastq.gz   | Q173_   | 1.977  | 1568.0  | 1802.0             | 3.55 | NAS | 9.0  | 2 | 700 | 06NOV2020 19:08 | LY3819253 700mg IV           |
| 10021004 | 11800001353 | 9_11800001353_323555w_BA9.fastq.gz    | P9L     | 3.983  | 6754.0  | 1798.6412121212100 | 5.69 | NAS | 9.0  | 2 | 700 | 28OCT2020 22:00 | LY3819253 700mg IV           |
| 10021004 | 11800001353 | 9_11800001353_323555w_BA9.fastq.gz    | L141del | 3.136  | 287.0   | 1798.6412121212100 | 5.69 | NAS | 9.0  | 2 | 700 | 28OCT2020 22:00 | LY3819253 700mg IV           |
| 10021004 | 11800001353 | 9_11800001353_323555w_BA9.fastq.gz    | Y144F   | 3.906  | 256.0   | 1798.6412121212100 | 5.69 | NAS | 9.0  | 2 | 700 | 28OCT2020 22:00 | LY3819253 700mg IV           |
| 10021004 | 11800001353 | 9_11800001353_323555w_BA9.fastq.gz    | E484Q   | 14.532 | 1741.0  | 1798.6412121212100 | 5.69 | NAS | 9.0  | 2 | 700 | 28OCT2020 22:00 | LY3819253 700mg IV           |
| 10021004 | 11800001353 | 9_11800001353_323555w_BA9.fastq.gz    | K814T   | 11.111 | 9.0     | 1798.6412121212100 | 5.69 | NAS | 9.0  | 2 | 700 | 28OCT2020 22:00 | LY3819253 700mg IV           |
| 10201021 | 11821064393 | H1_11821064393_323524w_BH1.fastq.gz   | E406G   | 1.135  | 1233.0  | 1229.8327183271800 | 2.35 | NAS | 9.0  | 2 | 700 | 23NOV2020 20:30 | Placebo for LY3819253 700 mg |
| 10411001 | 11802109447 | 61_11802109447_323232w_AF1.fastq.gz   | K854_   | 5.0    | 20.0    | 3739.805491990850  | 4.38 | NAS | 9.0  | 2 | 700 | 15NOV2020 17:40 | Placebo for LY3819253 700 mg |
| 10411001 | 11802109447 | 61_11802109447_323232w_AF1.fastq.gz   | L861F   | 5.0    | 20.0    | 3739.805491990850  | 4.38 | NAS | 9.0  | 2 | 700 | 15NOV2020 17:40 | Placebo for LY3819253 700 mg |
| 10411001 | 11802109447 | 61_11802109447_323232w_AF1.fastq.gz   | L865P   | 5.0    | 20.0    | 3739.805491990850  | 4.38 | NAS | 9.0  | 2 | 700 | 15NOV2020 17:40 | Placebo for LY3819253 700 mg |
| 10411001 | 11802109447 | 61_11802109447_323232w_AF1.fastq.gz   | M869L   | 5.0    | 20.0    | 3739.805491990850  | 4.38 | NAS | 9.0  | 2 | 700 | 15NOV2020 17:40 | Placebo for LY3819253 700 mg |
| 10251008 | 11839933635 | C5_11839933635_323692w_NC5.fastq.gz   | S494P   | 3.323  | 1685.0  | 1652.4271844660200 | 6.35 | NAS | 9.0  | 2 | 700 | 04NOV2020 16:02 | LY3819253 700mg IV           |
| 10251008 | 11839933635 | C5_11839933635_323692w_NC5.fastq.gz   | F782V   | 1.159  | 949.0   | 1652.4271844660200 | 6.35 | NAS | 9.0  | 2 | 700 | 04NOV2020 16:02 | LY3819253 700mg IV           |
| 10251008 | 11839933635 | C5_11839933635_323692w_NC5.fastq.gz   | A783V   | 1.266  | 948.0   | 1652.4271844660200 | 6.35 | NAS | 9.0  | 2 | 700 | 04NOV2020 16:02 | LY3819253 700mg IV           |
| 10251008 | 11839933635 | C5_11839933635_323692w_NC5.fastq.gz   | F817V   | 1.075  | 93.0    | 1652.4271844660200 | 6.35 | NAS | 9.0  | 2 | 700 | 04NOV2020 16:02 | LY3819253 700mg IV           |
| 10021004 | 11800000843 | 10_11800000843_323555w_BA10.fastq.gz  | L141del | 51.22  | 41.0    | 1970.2721749696200 | 5.41 | NAS | 10.0 | 2 | 700 | 29OCT2020 20:41 | LY3819253 700mg IV           |
| 10021004 | 11800000843 | 10_11800000843_323555w_BA10.fastq.gz  | G142del | 98.81  | 1261.0  | 1970.2721749696200 | 5.41 | NAS | 10.0 | 2 | 700 | 29OCT2020 20:41 | LY3819253 700mg IV           |
| 10021004 | 11800000843 | 10_11800000843_323555w_BA10.fastq.gz  | V143del | 98.388 | 1241.0  | 1970.2721749696200 | 5.41 | NAS | 10.0 | 2 | 700 | 29OCT2020 20:41 | LY3819253 700mg IV           |
| 10021004 | 11800000843 | 10_11800000843_323555w_BA10.fastq.gz  | S254F   | 99.942 | 1722.0  | 1970.2721749696200 | 5.41 | NAS | 10.0 | 2 | 700 | 29OCT2020 20:41 | LY3819253 700mg IV           |
| 10021004 | 11800000843 | 10_11800000843_323555w_BA10.fastq.gz  | E484K   | 98.446 | 1866.0  | 1970.2721749696200 | 5.41 | NAS | 10.0 | 2 | 700 | 29OCT2020 20:41 | LY3819253 700mg IV           |
| 10021004 | 11800000843 | 10_11800000843_323555w_BA10.fastq.gz  | D614G   | 99.865 | 1484.0  | 1970.2721749696200 | 5.41 | NAS | 10.0 | 2 | 700 | 29OCT2020 20:41 | LY3819253 700mg IV           |
| 10051004 | 11802169421 | 22_11802169421_323555w_BB10.fastq.gz  | D138H   | 99.745 | 1178.0  | 1511.0716889428900 | 5.72 | NAS | 10.0 | 2 | 700 | 29OCT2020 12:00 | LY3819253 700mg IV           |
| 10051004 | 11802169421 | 22_11802169421_323555w_BB10.fastq.gz  | E484K   | 97.222 | 1188.0  | 1511.0716889428900 | 5.72 | NAS | 10.0 | 2 | 700 | 29OCT2020 12:00 | LY3819253 700mg IV           |
| 10051004 | 11802169421 | 22_11802169421_323555w_BB10.fastq.gz  | D614G   | 99.688 | 960.0   | 1511.0716889428900 | 5.72 | NAS | 10.0 | 2 | 700 | 29OCT2020 12:00 | LY3819253 700mg IV           |
| 10051004 | 11802169421 | 22_11802169421_323555w_BB10.fastq.gz  | K814N   | 71.429 | 7.0     | 1511.0716889428900 | 5.72 | NAS | 10.0 | 2 | 700 | 29OCT2020 12:00 | LY3819253 700mg IV           |
| 10051005 | 11802169677 | 31_11802169677_323555w_BC7.fastq.gz   | E484Q   | 99.658 | 1752.0  | 1794.0872235872200 | 2.57 | NAS | 10.0 | 2 | 700 | 07NOV2020 18:00 | LY3819253 700mg IV           |
| 10051005 | 11802169677 | 31_11802169677_323555w_BC7.fastq.gz   | D614G   | 99.922 | 1284.0  | 1794.0872235872200 | 2.57 | NAS | 10.0 | 2 | 700 | 07NOV2020 18:00 | LY3819253 700mg IV           |
| 10011015 | 11839856450 | 22_56450_322847w_BB10.fastq.gz        | E484K   | 99.733 | 4489.0  | 4585.73309608541   | 5.2  | NAS | 10.0 | 2 | 700 | 06NOV2020 07:15 | LY3819253 700mg IV           |
| 10011015 | 11839856450 | 22_56450_322847w_BB10.fastq.gz        | D614G   | 99.89  | 3627.0  | 4585.73309608541   | 5.2  | NAS | 10.0 | 2 | 700 | 06NOV2020 07:15 | LY3819253 700mg IV           |
| 10251008 | 11816849223 | C10_11816849223_323692w_NC10.fastq.gz | E484K   | 98.943 | 2650.0  | 3062.6036585365900 | 5.52 | NAS | 10.0 | 2 | 700 | 05NOV2020 16:53 | LY3819253 700mg IV           |
| 10251008 | 11816849223 | C10_11816849223_323692w_NC10.fastq.gz | D614G   | 99.731 | 2227.0  | 3062.6036585365900 | 5.52 | NAS | 10.0 | 2 | 700 | 05NOV2020 16:53 | LY3819253 700mg IV           |
| 10201008 | 11821038665 | B4_11821038665_323692w_NB4.fastq.gz   | E484K   | 66.047 | 5107.0  | 4671.038882138520  | 6.61 | NAS | 10.0 | 2 | 700 | 30OCT2020 18:30 | LY3819253 700mg IV           |
| 10201008 | 11821038665 | B4_11821038665_323692w_NB4.fastq.gz   | Q493R   | 33.469 | 4927.0  | 4671.038882138520  | 6.61 | NAS | 10.0 | 2 | 700 | 30OCT2020 18:30 | LY3819253 700mg IV           |
| 10201008 | 11821038665 | B4_11821038665_323692w_NB4.fastq.gz   | D614G   | 99.924 | 3971.0  | 4671.038882138520  | 6.61 | NAS | 10.0 | 2 | 700 | 30OCT2020 18:30 | LY3819253 700mg IV           |
| 10201008 | 11821038665 | B4_11821038665_323692w_NB4.fastq.gz   | P681R   | 99.932 | 2953.0  | 4671.038882138520  | 6.61 | NAS | 10.0 | 2 | 700 | 30OCT2020 18:30 | LY3819253 700mg IV           |
| 10221006 | 11821037708 | E8_11821037708_323692w_NE8.fastq.gz   | S13I    | 99.926 | 8140.0  | 2801.613022113020  | 2.37 | NAS | 10.0 | 2 | 700 | 06NOV2020 17:30 | LY3819253 700mg IV           |
| 10221006 | 11821037708 | E8_11821037708_323692w_NE8.fastq.gz   | W152C   | 99.752 | 2415.0  | 2801.613022113020  | 2.37 | NAS | 10.0 | 2 | 700 | 06NOV2020 17:30 | LY3819253 700mg IV           |
| 10221006 | 11821037708 | E8_11821037708_323692w_NE8.fastq.gz   | L452R   | 99.889 | 2699.0  | 2801.613022113020  | 2.37 | NAS | 10.0 | 2 | 700 | 06NOV2020 17:30 | LY3819253 700mg IV           |
| 10221006 | 11821037708 | E8_11821037708_323692w_NE8.fastq.gz   | D614G   | 99.578 | 2843.0  | 2801.613022113020  | 2.37 | NAS | 10.0 | 2 | 700 | 06NOV2020 17:30 | LY3819253 700mg IV           |
| 10051009 | 11816845185 | D8_11816845185_323692w_ND8.fastq.gz   | E484K   | 99.844 | 2565.0  | 2568.507371007370  | 4.81 | NAS | 10.0 | 2 | 700 | 23NOV2020 20:00 | LY3819253 700mg IV           |
| 10051009 | 11816845185 | D8_11816845185_323692w_ND8.fastq.gz   | D614G   | 99.67  | 1816.0  | 2568.507371007370  | 4.81 | NAS | 10.0 | 2 | 700 | 23NOV2020 20:00 | LY3819253 700mg IV           |
| 10021004 | 11800000843 | 10_11800000843_323555w_BA10.fastq.gz  | Y144C   | 3.571  | 28.0    | 1970.2721749696200 | 5.41 | NAS | 10.0 | 2 | 700 | 29OCT2020 20:41 | LY3819253 700mg IV           |
| 10021004 | 11800000843 | 10_11800000843_323555w_BA10.fastq.gz  | E484Q   | 1.393  | 1866.0  | 1970.2721749696200 | 5.41 | NAS | 10.0 | 2 | 700 | 29OCT2020 20:41 | LY3819253 700mg IV           |
| 10051004 | 11802169421 | 22_11802169421_323555w_BB10.fastq.gz  | G485V   | 2.584  | 1161.0  | 1511.0716889428900 | 5.72 | NAS | 10.0 | 2 | 700 | 29OCT2020 12:00 | LY3819253 700mg IV           |
| 10051004 | 11802169421 | 22_11802169421_323555w_BB10.fastq.gz  | S686R   | 1.055  | 2180.0  | 1511.0716889428900 | 5.72 | NAS | 10.0 | 2 | 700 | 29OCT2020 12:00 | LY3819253 700mg IV           |
| 10051005 | 11802169677 | 31_11802169677_323555w_BC7.fastq.gz   | A766T   | 1.078  | 371.0   | 1794.0872235872200 | 2.57 | NAS | 10.0 | 2 | 700 | 07NOV2020 18:00 | LY3819253 700mg IV           |
| 10011015 | 11839856450 | 22_56450_322847w_BB10.fastq.gz        | T63N    | 2.838  | 5568.0  | 4585.73309608541   | 5.2  | NAS | 10.0 | 2 | 700 | 06NOV2020 07:15 | LY3819253 700mg IV           |
| 10011015 | 11839856450 | 22_56450_322847w_BB10.fastq.gz        | R815S   | 1.25   | 80.0    | 4585.73309608541   | 5.2  | NAS | 10.0 | 2 | 700 | 06NOV2020 07:15 | LY3819253 700mg IV           |
| 10201008 | 11821038665 | B4_11821038665_323692w_NB4.fastq.gz   | F43S    | 1.452  | 8195.0  | 4671.038882138520  | 6.61 | NAS | 10.0 | 2 | 700 | 30OCT2020 18:30 | LY3819253 700mg IV           |
| 10221006 | 11821037708 | E8_11821037708_323692w_NE8.fastq.gz   | V642del | 6.865  | 1617.0  | 2801.613022113020  | 2.37 | NAS | 10.0 | 2 | 700 | 06NOV2020 17:30 | LY3819253 700mg IV           |
| 10051009 | 11816845185 | D8_11816845185_323692w_ND8.fastq.gz   | S686G   | 1.024  | 1856.0  | 2568.507371007370  | 4.81 | NAS | 10.0 | 2 | 700 | 23NOV2020 20:00 | LY3819253 700mg IV           |
| 10051005 | 11802167374 | 29_11802167374_323555w_BC5.fastq.gz   | E484Q   | 100.0  | 1474.0  | 1498.8682266009900 | 2.28 | NAS | 11.0 | 2 | 700 | 08NOV2020 21:00 | LY3819253 700mg IV           |
| 10051005 | 11802167374 | 29_11802167374_323555w_BC5.fastq.gz   | D614G   | 99.736 | 1136.0  | 1498.8682266009900 | 2.28 | NAS | 11.0 | 2 | 700 | 08NOV2020 21:00 | LY3819253 700mg IV           |
| 10021004 | 11800002891 | 11_11800002891_323555w_BA11.fastq.gz  | P9L     | 92.572 | 4739.0  | 1867.236650485440  | 6.82 | NAS | 11.0 | 2 | 700 | 30OCT2020 20:00 | LY3819253 700mg IV           |
| 10021004 | 11800002891 | 11_11800002891_323555w_BA11.fastq.gz  | S254F   | 100.0  | 1719.0  | 1867.236650485440  | 6.82 | NAS | 11.0 | 2 | 700 | 30OCT2020 20:00 | LY3819253 700mg IV           |
| 10021004 | 11800002891 | 11_11800002891_323555w_BA11.fastq.gz  | E484Q   | 99.838 | 1855.0  | 1867.236650485440  | 6.82 | NAS | 11.0 | 2 | 700 | 30OCT2020 20:00 | LY3819253 700mg IV           |
| 10021004 | 11800002891 | 11_11800002891_323555w_BA11.fastq.gz  | D614G   | 99.932 | 1469.0  | 1867.236650485440  | 6.82 | NAS | 11.0 | 2 | 700 | 30OCT2020 20:00 | LY3819253 700mg IV           |
| 10051004 | 11802170437 | 21_11802170437_323555w_BB9.fastq.gz   | F43S    | 65.36  | 10000.0 | 1861.0700245700200 | 4.15 | NAS | 11.0 | 2 | 700 | 30OCT2020 10:27 | LY3819253 700mg IV           |
| 10051004 | 11802170437 | 21_11802170437_323555w_BB9.fastq.gz   | D138H   | 99.938 | 1600.0  | 1861.0700245700200 | 4.15 | NAS | 11.0 | 2 | 700 | 30OCT2020 10:27 | LY3819253 700mg IV           |
| 10051004 | 11802170437 | 21_11802170437_323555w_BB9.fastq.gz   | E484K   | 99.863 | 1459.0  | 1861.0700245700200 | 4.15 | NAS | 11.0 | 2 | 700 | 30OCT2020 10:27 | LY3819253 700mg IV           |
| 10051004 | 11802170437 | 21_11802170437_323555w_BB9.fastq.gz   | D614G   | 99.782 | 1378.0  | 1861.0700245700200 | 4.15 | NAS | 11.0 | 2 | 700 | 30OCT2020 10:27 | LY3819253 700mg IV           |
| 10011015 | 11839854147 | C5_11839854147_323524w_BC5.fastq.gz   | E484K   | 100.0  | 1379.0  | 1458.2466257668700 | 4.27 | NAS | 11.0 | 2 | 700 | 07NOV2020 07:30 | LY3819253 700mg IV           |
| 10011015 | 11839854147 | C5_11839854147_323524w_BC5.fastq.gz   | D614G   | 100.0  | 1220.0  | 1458.2466257668700 | 4.27 | NAS | 11.0 | 2 | 700 | 07NOV2020 07:30 | LY3819253 700mg IV           |
| 10091003 | 11802165576 | B5_11802165576_324019w_CB5.fastq.gz   | S98F    | 99.477 | 1148.0  | 1969.5799755799800 | 3.22 | NAS | 11.0 | 2 | 700 | 10NOV2020 13:56 | Placebo for LY3819253 700 mg |
|          |             |                                       |         |        |         |                    |      |     |      |   |     |                 |                              |

|          |             |                                       |       |        |         |                    |      |     |      |   |     |                 |                              |
|----------|-------------|---------------------------------------|-------|--------|---------|--------------------|------|-----|------|---|-----|-----------------|------------------------------|
| 10011015 | 11839854147 | C5_11839854147_323524w_BC5.fastq.gz   | T63N  | 1.532  | 2284.0  | 1458.2466257668700 | 4.27 | NAS | 11.0 | 2 | 700 | 07NOV2020 07:30 | LY3819253 700mg IV           |
| 10011015 | 11839854147 | C5_11839854147_323524w_BC5.fastq.gz   | S640Y | 1.117  | 1074.0  | 1458.2466257668700 | 4.27 | NAS | 11.0 | 2 | 700 | 07NOV2020 07:30 | LY3819253 700mg IV           |
| 10091003 | 11802165576 | B5_11802165576_324019w_CB5.fastq.gz   | S530T | 3.918  | 2348.0  | 1969.5799755799800 | 3.22 | NAS | 11.0 | 2 | 700 | 10NOV2020 13:56 | Placebo for LY3819253 700 mg |
| 10091003 | 11802165576 | B5_11802165576_324019w_CB5.fastq.gz   | Q563_ | 4.905  | 1631.0  | 1969.5799755799800 | 3.22 | NAS | 11.0 | 2 | 700 | 10NOV2020 13:56 | Placebo for LY3819253 700 mg |
| 10091003 | 11802165576 | B5_11802165576_324019w_CB5.fastq.gz   | Q607_ | 4.087  | 1248.0  | 1969.5799755799800 | 3.22 | NAS | 11.0 | 2 | 700 | 10NOV2020 13:56 | Placebo for LY3819253 700 mg |
| 10091003 | 11802165576 | B5_11802165576_324019w_CB5.fastq.gz   | P621S | 4.216  | 1186.0  | 1969.5799755799800 | 3.22 | NAS | 11.0 | 2 | 700 | 10NOV2020 13:56 | Placebo for LY3819253 700 mg |
| 10091003 | 11802165576 | B5_11802165576_324019w_CB5.fastq.gz   | S735L | 4.327  | 624.0   | 1969.5799755799800 | 3.22 | NAS | 11.0 | 2 | 700 | 10NOV2020 13:56 | Placebo for LY3819253 700 mg |
| 10091003 | 11802165576 | B5_11802165576_324019w_CB5.fastq.gz   | K786R | 2.18   | 734.0   | 1969.5799755799800 | 3.22 | NAS | 11.0 | 2 | 700 | 10NOV2020 13:56 | Placebo for LY3819253 700 mg |
| 10251008 | 11816849231 | C6_11816849231_323692w_NC6.fastq.gz   | S12P  | 1.994  | 7121.0  | 2528.5261875761300 | 5.41 | NAS | 11.0 | 2 | 700 | 06NOV2020 16:44 | LY3819253 700mg IV           |
| 10251008 | 11816849231 | C6_11816849231_323692w_NC6.fastq.gz   | S494P | 12.128 | 2383.0  | 2528.5261875761300 | 5.41 | NAS | 11.0 | 2 | 700 | 06NOV2020 16:44 | LY3819253 700mg IV           |
| 10201008 | 11854528002 | B5_11854528002_323692w_NB5.fastq.gz   | T19I  | 3.344  | 7057.0  | 2440.8448484848500 | 7.74 | NAS | 11.0 | 2 | 700 | 31OCT2020 18:30 | LY3819253 700mg IV           |
| 10201008 | 11854528002 | B5_11854528002_323692w_NB5.fastq.gz   | Q493R | 12.723 | 2413.0  | 2440.8448484848500 | 7.74 | NAS | 11.0 | 2 | 700 | 31OCT2020 18:30 | LY3819253 700mg IV           |
| 10201008 | 11854528002 | B5_11854528002_323692w_NB5.fastq.gz   | T778A | 1.677  | 1431.0  | 2440.8448484848500 | 7.74 | NAS | 11.0 | 2 | 700 | 31OCT2020 18:30 | LY3819253 700mg IV           |
| 10201008 | 11854528002 | B5_11854528002_323692w_NB5.fastq.gz   | A783V | 1.009  | 1585.0  | 2440.8448484848500 | 7.74 | NAS | 11.0 | 2 | 700 | 31OCT2020 18:30 | LY3819253 700mg IV           |
| 10121010 | 11850332616 | F11_11850332616_324020w_NF11.fastq.gz | T19I  | 47.931 | 3407.0  | 2277.5201465201500 | 2.29 | NAS | 12.0 | 2 | 700 | 21NOV2020 23:30 | Placebo for LY3819253 700 mg |
| 10121010 | 11850332616 | F11_11850332616_324020w_NF11.fastq.gz | D614G | 99.747 | 1584.0  | 2277.5201465201500 | 2.29 | NAS | 12.0 | 2 | 700 | 21NOV2020 23:30 | Placebo for LY3819253 700 mg |
| 10121010 | 11850332616 | F11_11850332616_324020w_NF11.fastq.gz | S708F | 20.306 | 2285.0  | 2277.5201465201500 | 2.29 | NAS | 12.0 | 2 | 700 | 21NOV2020 23:30 | Placebo for LY3819253 700 mg |
| 10121010 | 11850332616 | F11_11850332616_324020w_NF11.fastq.gz | K814N | 100.0  | 1.0     | 2277.5201465201500 | 2.29 | NAS | 12.0 | 2 | 700 | 21NOV2020 23:30 | Placebo for LY3819253 700 mg |
| 10021004 | 11800002632 | 12_11800002632_323555w_BA12.fastq.gz  | P9L   | 98.526 | 6376.0  | 2056.9366626065800 | 6.82 | NAS | 12.0 | 2 | 700 | 31OCT2020 21:21 | LY3819253 700mg IV           |
| 10021004 | 11800002632 | 12_11800002632_323555w_BA12.fastq.gz  | S254F | 100.0  | 1554.0  | 2056.9366626065800 | 6.82 | NAS | 12.0 | 2 | 700 | 31OCT2020 21:21 | LY3819253 700mg IV           |
| 10021004 | 11800002632 | 12_11800002632_323555w_BA12.fastq.gz  | E484Q | 99.578 | 1657.0  | 2056.9366626065800 | 6.82 | NAS | 12.0 | 2 | 700 | 31OCT2020 21:21 | LY3819253 700mg IV           |
| 10021004 | 11800002632 | 12_11800002632_323555w_BA12.fastq.gz  | D614G | 100.0  | 1492.0  | 2056.9366626065800 | 6.82 | NAS | 12.0 | 2 | 700 | 31OCT2020 21:21 | LY3819253 700mg IV           |
| 10011015 | 11839856456 | C4_11839856456_323524w_BC4.fastq.gz   | E484K | 99.727 | 1099.0  | 1143.4822954823000 | 3.6  | NAS | 12.0 | 2 | 700 | 08NOV2020 07:00 | LY3819253 700mg IV           |
| 10011015 | 11839856456 | C4_11839856456_323524w_BC4.fastq.gz   | D614G | 99.878 | 821.0   | 1143.4822954823000 | 3.6  | NAS | 12.0 | 2 | 700 | 08NOV2020 07:00 | LY3819253 700mg IV           |
| 10011023 | 11856698631 | G12_11856698631_323524w_BG12.fastq.gz | D614G | 100.0  | 1192.0  | 1525.660516605170  | 2.54 | NAS | 12.0 | 2 | 700 | 25NOV2020 23:30 | Placebo for LY3819253 700 mg |
| 10051005 | 11802169676 | 36_69676_322847w_BC12.fastq.gz        | S71P  | 25.418 | 4005.0  | 2924.832722832720  | 4.16 | NAS | 12.0 | 2 | 700 | 09NOV2020 19:00 | LY3819253 700mg IV           |
| 10051005 | 11802169676 | 36_69676_322847w_BC12.fastq.gz        | E484Q | 99.821 | 2788.0  | 2924.832722832720  | 4.16 | NAS | 12.0 | 2 | 700 | 09NOV2020 19:00 | LY3819253 700mg IV           |
| 10051005 | 11802169676 | 36_69676_322847w_BC12.fastq.gz        | D614G | 99.871 | 2327.0  | 2924.832722832720  | 4.16 | NAS | 12.0 | 2 | 700 | 09NOV2020 19:00 | LY3819253 700mg IV           |
| 10051004 | 11802167375 | 10_67375_322847w_BA10.fastq.gz        | D138H | 99.9   | 2008.0  | 2133.665042630940  | 3.45 | NAS | 12.0 | 2 | 700 | 01NOV2020 07:57 | LY3819253 700mg IV           |
| 10051004 | 11802167375 | 10_67375_322847w_BA10.fastq.gz        | E484K | 99.9   | 1993.0  | 2133.665042630940  | 3.45 | NAS | 12.0 | 2 | 700 | 01NOV2020 07:57 | LY3819253 700mg IV           |
| 10051004 | 11802167375 | 10_67375_322847w_BA10.fastq.gz        | D614G | 99.936 | 1552.0  | 2133.665042630940  | 3.45 | NAS | 12.0 | 2 | 700 | 01NOV2020 07:57 | LY3819253 700mg IV           |
| 10221006 | 11821040774 | E9_11821040774_323692w_NE9.fastq.gz   | S13I  | 99.84  | 10000.0 | 4751.848522167490  | 2.19 | NAS | 12.0 | 2 | 700 | 08NOV2020 20:00 | LY3819253 700mg IV           |
| 10221006 | 11821040774 | E9_11821040774_323692w_NE9.fastq.gz   | W152C | 99.872 | 4691.0  | 4751.848522167490  | 2.19 | NAS | 12.0 | 2 | 700 | 08NOV2020 20:00 | LY3819253 700mg IV           |
| 10221006 | 11821040774 | E9_11821040774_323692w_NE9.fastq.gz   | L452R | 99.846 | 5190.0  | 4751.848522167490  | 2.19 | NAS | 12.0 | 2 | 700 | 08NOV2020 20:00 | LY3819253 700mg IV           |
| 10221006 | 11821040774 | E9_11821040774_323692w_NE9.fastq.gz   | D614G | 99.792 | 3841.0  | 4751.848522167490  | 2.19 | NAS | 12.0 | 2 | 700 | 08NOV2020 20:00 | LY3819253 700mg IV           |
| 10221006 | 11821040774 | E9_11821040774_323692w_NE9.fastq.gz   | D796G | 99.725 | 1090.0  | 4751.848522167490  | 2.19 | NAS | 12.0 | 2 | 700 | 08NOV2020 20:00 | LY3819253 700mg IV           |
| 10201008 | 11854528008 | B6_11854528008_323692w_NB6.fastq.gz   | F43T  | 20.86  | 9075.0  | 4610.773170731710  | 7.51 | NAS | 12.0 | 2 | 700 | 01NOV2020 18:30 | LY3819253 700mg IV           |
| 10201008 | 11854528008 | B6_11854528008_323692w_NB6.fastq.gz   | E484K | 99.241 | 4740.0  | 4610.773170731710  | 7.51 | NAS | 12.0 | 2 | 700 | 01NOV2020 18:30 | LY3819253 700mg IV           |
| 10201008 | 11854528008 | B6_11854528008_323692w_NB6.fastq.gz   | D614G | 99.868 | 3781.0  | 4610.773170731710  | 7.51 | NAS | 12.0 | 2 | 700 | 01NOV2020 18:30 | LY3819253 700mg IV           |
| 10201008 | 11854528008 | B6_11854528008_323692w_NB6.fastq.gz   | P681R | 99.762 | 2942.0  | 4610.773170731710  | 7.51 | NAS | 12.0 | 2 | 700 | 01NOV2020 18:30 | LY3819253 700mg IV           |
| 10251008 | 11816847940 | C7_11816847940_323692w_NC7.fastq.gz   | E484K | 99.704 | 3038.0  | 2878.903658536590  | 4.16 | NAS | 12.0 | 2 | 700 | 07NOV2020 21:29 | LY3819253 700mg IV           |
| 10251008 | 11816847940 | C7_11816847940_323692w_NC7.fastq.gz   | D614G | 99.867 | 2260.0  | 2878.903658536590  | 4.16 | NAS | 12.0 | 2 | 700 | 07NOV2020 21:29 | LY3819253 700mg IV           |
| 10051009 | 11808409294 | D7_11808409294_323692w_ND7.fastq.gz   | E484K | 99.89  | 2730.0  | 2948.291108404390  | 4.61 | NAS | 12.0 | 2 | 700 | 25NOV2020 20:00 | LY3819253 700mg IV           |
| 10051009 | 11808409294 | D7_11808409294_323692w_ND7.fastq.gz   | D614G | 99.676 | 2160.0  | 2948.291108404390  | 4.61 | NAS | 12.0 | 2 | 700 | 25NOV2020 20:00 | LY3819253 700mg IV           |
| 10121010 | 11850332616 | F11_11850332616_324020w_NF11.fastq.gz | L54F  | 1.388  | 1945.0  | 2277.5201465201500 | 2.29 | NAS | 12.0 | 2 | 700 | 21NOV2020 23:30 | Placebo for LY3819253 700 mg |
| 10121010 | 11850332616 | F11_11850332616_324020w_NF11.fastq.gz | T791I | 18.488 | 3943.0  | 2277.5201465201500 | 2.29 | NAS | 12.0 | 2 | 700 | 21NOV2020 23:30 | Placebo for LY3819253 700 mg |
| 10021004 | 11800002632 | 12_11800002632_323555w_BA12.fastq.gz  | S735_ | 16.115 | 2296.0  | 2056.9366626065800 | 6.82 | NAS | 12.0 | 2 | 700 | 31OCT2020 21:21 | LY3819253 700mg IV           |
| 10021004 | 11800002632 | 12_11800002632_323555w_BA12.fastq.gz  | T747A | 1.096  | 1733.0  | 2056.9366626065800 | 6.82 | NAS | 12.0 | 2 | 700 | 31OCT2020 21:21 | LY3819253 700mg IV           |
| 10011015 | 11839856456 | C4_11839856456_323524w_BC4.fastq.gz   | S297L | 1.295  | 1158.0  | 1143.4822954823000 | 3.6  | NAS | 12.0 | 2 | 700 | 08NOV2020 07:00 | LY3819253 700mg IV           |
| 10051004 | 11802167375 | 10_67375_322847w_BA10.fastq.gz        | F59L  | 1.26   | 3333.0  | 2133.665042630940  | 3.45 | NAS | 12.0 | 2 | 700 | 01NOV2020 07:57 | LY3819253 700mg IV           |
| 10051004 | 11802167375 | 10_67375_322847w_BA10.fastq.gz        | R78S  | 1.201  | 2498.0  | 2133.665042630940  | 3.45 | NAS | 12.0 | 2 | 700 | 01NOV2020 07:57 | LY3819253 700mg IV           |
| 10051004 | 11802167375 | 10_67375_322847w_BA10.fastq.gz        | S155I | 2.174  | 2070.0  | 2133.665042630940  | 3.45 | NAS | 12.0 | 2 | 700 | 01NOV2020 07:57 | LY3819253 700mg IV           |
| 10051004 | 11802167375 | 10_67375_322847w_BA10.fastq.gz        | C166G | 1.048  | 2195.0  | 2133.665042630940  | 3.45 | NAS | 12.0 | 2 | 700 | 01NOV2020 07:57 | LY3819253 700mg IV           |
| 10051004 | 11802167375 | 10_67375_322847w_BA10.fastq.gz        | Q218_ | 1.026  | 1949.0  | 2133.665042630940  | 3.45 | NAS | 12.0 | 2 | 700 | 01NOV2020 07:57 | LY3819253 700mg IV           |
| 10051004 | 11802167375 | 10_67375_322847w_BA10.fastq.gz        | A222V | 1.116  | 1972.0  | 2133.665042630940  | 3.45 | NAS | 12.0 | 2 | 700 | 01NOV2020 07:57 | LY3819253 700mg IV           |
| 10051004 | 11802167375 | 10_67375_322847w_BA10.fastq.gz        | K529N | 2.35   | 1915.0  | 2133.665042630940  | 3.45 | NAS | 12.0 | 2 | 700 | 01NOV2020 07:57 | LY3819253 700mg IV           |
| 10051004 | 11802167375 | 10_67375_322847w_BA10.fastq.gz        | K529E | 1.097  | 1915.0  | 2133.665042630940  | 3.45 | NAS | 12.0 | 2 | 700 | 01NOV2020 07:57 | LY3819253 700mg IV           |
| 10051004 | 11802167375 | 10_67375_322847w_BA10.fastq.gz        | G545D | 1.023  | 1857.0  | 2133.665042630940  | 3.45 | NAS | 12.0 | 2 | 700 | 01NOV2020 07:57 | LY3819253 700mg IV           |
| 10251008 | 11816847940 | C7_11816847940_323692w_NC7.fastq.gz   | A783V | 1.183  | 1183.0  | 2878.903658536590  | 4.16 | NAS | 12.0 | 2 | 700 | 07NOV2020 21:29 | LY3819253 700mg IV           |
| 10051009 | 11808409294 | D7_11808409294_323692w_ND7.fastq.gz   | Y505C | 11.198 | 2679.0  | 2948.291108404390  | 4.61 | NAS | 12.0 | 2 | 700 | 25NOV2020 20:00 | LY3819253 700mg IV           |
| 10051009 | 11808409294 | D7_11808409294_323692w_ND7.fastq.gz   | S686G | 1.62   | 2469.0  | 2948.291108404390  | 4.61 | NAS | 12.0 | 2 | 700 | 25NOV2020 20:00 | LY3819253 700mg IV           |
| 10051005 | 11802170695 | 30_11802170695_323555w_BC6.fastq.gz   | E484Q | 99.853 | 1356.0  | 1476.403680981600  | 2.99 | NAS | 13.0 | 2 | 700 | 10NOV2020 21:00 | LY3819253 700mg IV           |
| 10051005 | 11802170695 | 30_11802170695_323555w_BC6.fastq.gz   | D614G | 99.604 | 1010.0  | 1476.403680981600  | 2.99 | NAS | 13.0 | 2 | 700 | 10NOV2020 21:00 | LY3819253 700mg IV           |
| 10051005 | 11802170695 | 30_11802170695_323555w_BC6.fastq.gz   | K814N | 100.0  | 1.0     | 1476.403680981600  | 2.99 | NAS | 13.0 | 2 | 700 | 10NOV2020 21:00 | LY3819253 700mg IV           |
| 10021004 |             |                                       |       |        |         |                    |      |     |      |   |     |                 |                              |

|          |             |                                       |       |        |        |                    |      |     |      |   |     |                 |                              |
|----------|-------------|---------------------------------------|-------|--------|--------|--------------------|------|-----|------|---|-----|-----------------|------------------------------|
| 10051009 | 11814765700 | D10_11814765700_323692w_ND10.fastq.gz | D614G | 99.848 | 2624.0 | 3615.4341463414600 | 3.89 | NAS | 13.0 | 2 | 700 | 27NOV2020 19:00 | LY3819253 700mg IV           |
| 10131010 | 11850347086 | 2_11850347086_323523w_AE12.fastq.gz   | D111N | 99.862 | 2894.0 | 2723.078431372550  | 4.09 | NAS | 13.0 | 2 | 700 | 23NOV2020 18:55 | Placebo for LY3819253 700 mg |
| 10131010 | 11850347086 | 2_11850347086_323523w_AE12.fastq.gz   | G142C | 55.486 | 2406.0 | 2723.078431372550  | 4.09 | NAS | 13.0 | 2 | 700 | 23NOV2020 18:55 | Placebo for LY3819253 700 mg |
| 10131010 | 11850347086 | 2_11850347086_323523w_AE12.fastq.gz   | D614G | 99.901 | 2014.0 | 2723.078431372550  | 4.09 | NAS | 13.0 | 2 | 700 | 23NOV2020 18:55 | Placebo for LY3819253 700 mg |
| 10131010 | 11850347086 | 2_11850347086_323523w_AE12.fastq.gz   | T732A | 99.673 | 1530.0 | 2723.078431372550  | 4.09 | NAS | 13.0 | 2 | 700 | 23NOV2020 18:55 | Placebo for LY3819253 700 mg |
| 10021004 | 11800000584 | 13_11800000584_323555w_BB1.fastq.gz   | D796G | 13.997 | 1729.0 | 1483.0792682926800 | 5.07 | NAS | 13.0 | 2 | 700 | 01NOV2020 20:07 | LY3819253 700mg IV           |
| 10011015 | 11839855168 | D2_11839855168_323524w_BD2.fastq.gz   | T63N  | 2.545  | 2200.0 | 1290.9705521472400 | 3.27 | NAS | 13.0 | 2 | 700 | 09NOV2020 06:40 | LY3819253 700mg IV           |
| 10011015 | 11839855168 | D2_11839855168_323524w_BD2.fastq.gz   | L390F | 2.119  | 1274.0 | 1290.9705521472400 | 3.27 | NAS | 13.0 | 2 | 700 | 09NOV2020 06:40 | LY3819253 700mg IV           |
| 10011015 | 11839855168 | D2_11839855168_323524w_BD2.fastq.gz   | S746L | 4.526  | 464.0  | 1290.9705521472400 | 3.27 | NAS | 13.0 | 2 | 700 | 09NOV2020 06:40 | LY3819253 700mg IV           |
| 10251008 | 11816847950 | C8_11816847950_323692w_NC8.fastq.gz   | T22I  | 4.144  | 7071.0 | 2405.1747572815500 | 5.26 | NAS | 13.0 | 2 | 700 | 08NOV2020 17:29 | LY3819253 700mg IV           |
| 10251008 | 11816847950 | C8_11816847950_323692w_NC8.fastq.gz   | S494P | 2.732  | 2269.0 | 2405.1747572815500 | 5.26 | NAS | 13.0 | 2 | 700 | 08NOV2020 17:29 | LY3819253 700mg IV           |
| 10251008 | 11816847950 | C8_11816847950_323692w_NC8.fastq.gz   | S735T | 11.027 | 1315.0 | 2405.1747572815500 | 5.26 | NAS | 13.0 | 2 | 700 | 08NOV2020 17:29 | LY3819253 700mg IV           |
| 10251008 | 11816847950 | C8_11816847950_323692w_NC8.fastq.gz   | F782V | 1.05   | 3334.0 | 2405.1747572815500 | 5.26 | NAS | 13.0 | 2 | 700 | 08NOV2020 17:29 | LY3819253 700mg IV           |
| 10251008 | 11816847950 | C8_11816847950_323692w_NC8.fastq.gz   | A783V | 1.468  | 3337.0 | 2405.1747572815500 | 5.26 | NAS | 13.0 | 2 | 700 | 08NOV2020 17:29 | LY3819253 700mg IV           |
| 10201008 | 11854528265 | B7_11854528265_323692w_NB7.fastq.gz   | A783V | 1.176  | 1445.0 | 2468.008536585370  | 6.86 | NAS | 13.0 | 2 | 700 | 02NOV2020 18:30 | LY3819253 700mg IV           |
| 10051009 | 11814765700 | D10_11814765700_323692w_ND10.fastq.gz | K814T | 10.0   | 10.0   | 3615.4341463414600 | 3.89 | NAS | 13.0 | 2 | 700 | 27NOV2020 19:00 | LY3819253 700mg IV           |
| 10051009 | 11814765700 | D10_11814765700_323692w_ND10.fastq.gz | R815G | 10.0   | 10.0   | 3615.4341463414600 | 3.89 | NAS | 13.0 | 2 | 700 | 27NOV2020 19:00 | LY3819253 700mg IV           |
| 10131010 | 11850347086 | 2_11850347086_323523w_AE12.fastq.gz   | L110_ | 3.002  | 2998.0 | 2723.078431372550  | 4.09 | NAS | 13.0 | 2 | 700 | 23NOV2020 18:55 | Placebo for LY3819253 700 mg |
| 10131010 | 11850347086 | 2_11850347086_323523w_AE12.fastq.gz   | S297L | 2.039  | 2354.0 | 2723.078431372550  | 4.09 | NAS | 13.0 | 2 | 700 | 23NOV2020 18:55 | Placebo for LY3819253 700 mg |
| 10161007 | 11848329548 | D5_11848329548_324020w_ND5.fastq.gz   | N501T | 99.752 | 3625.0 | 2263.1323529411800 | 2.59 | NPH | 14.0 | 2 | 700 | 24NOV2020 09:21 | LY3819253 700mg IV           |
| 10161007 | 11848329548 | D5_11848329548_324020w_ND5.fastq.gz   | D614G | 99.685 | 1589.0 | 2263.1323529411800 | 2.59 | NPH | 14.0 | 2 | 700 | 24NOV2020 09:21 | LY3819253 700mg IV           |
| 10161007 | 11848329548 | D5_11848329548_324020w_ND5.fastq.gz   | Y789H | 37.545 | 831.0  | 2263.1323529411800 | 2.59 | NPH | 14.0 | 2 | 700 | 24NOV2020 09:21 | LY3819253 700mg IV           |
| 10161007 | 11848329548 | D5_11848329548_324020w_ND5.fastq.gz   | K814M | 100.0  | 1.0    | 2263.1323529411800 | 2.59 | NPH | 14.0 | 2 | 700 | 24NOV2020 09:21 | LY3819253 700mg IV           |
| 10051004 | 11835724366 | G1_11835724366_324020w_NG1.fastq.gz   | D138H | 100.0  | 752.0  | 2299.6053921568600 | 2.21 | NPH | 14.0 | 2 | 700 | 05NOV2020 11:00 | LY3819253 700mg IV           |
| 10051004 | 11835724366 | G1_11835724366_324020w_NG1.fastq.gz   | E484K | 99.77  | 5215.0 | 2299.6053921568600 | 2.21 | NPH | 14.0 | 2 | 700 | 05NOV2020 11:00 | LY3819253 700mg IV           |
| 10051004 | 11835724366 | G1_11835724366_324020w_NG1.fastq.gz   | D614G | 99.845 | 3226.0 | 2299.6053921568600 | 2.21 | NPH | 14.0 | 2 | 700 | 05NOV2020 11:00 | LY3819253 700mg IV           |
| 10051004 | 11835724366 | G1_11835724366_324020w_NG1.fastq.gz   | K814N | 100.0  | 3.0    | 2299.6053921568600 | 2.21 | NPH | 14.0 | 2 | 700 | 05NOV2020 11:00 | LY3819253 700mg IV           |
| 10691001 | 11802170759 | F10_11802170759_324020w_NF10.fastq.gz | D614G | 99.741 | 1159.0 | 1767.1609336609300 | 3.23 | NPH | 14.0 | 2 | 700 | 18NOV2020 15:38 | Placebo for LY3819253 700 mg |
| 10201007 | 11818965060 | H1_11818965060_324020w_NH1.fastq.gz   | D614G | 99.915 | 2349.0 | 2351.842490842490  | 3.01 | NPH | 14.0 | 2 | 700 | 29OCT2020 07:46 | LY3819253 700mg IV           |
| 10201007 | 11818965060 | H1_11818965060_324020w_NH1.fastq.gz   | P681R | 99.894 | 1891.0 | 2351.842490842490  | 3.01 | NPH | 14.0 | 2 | 700 | 29OCT2020 07:46 | LY3819253 700mg IV           |
| 10201007 | 11818965060 | H1_11818965060_324020w_NH1.fastq.gz   | K814M | 50.0   | 2.0    | 2351.842490842490  | 3.01 | NPH | 14.0 | 2 | 700 | 29OCT2020 07:46 | LY3819253 700mg IV           |
| 10201007 | 11818965060 | H1_11818965060_324020w_NH1.fastq.gz   | K814N | 50.0   | 2.0    | 2351.842490842490  | 3.01 | NPH | 14.0 | 2 | 700 | 29OCT2020 07:46 | LY3819253 700mg IV           |
| 10371008 | 11833581832 | C11_11833581832_324020w_NC11.fastq.gz | D614G | 99.802 | 1518.0 | 2292.1489621489600 | 2.33 | NPH | 14.0 | 2 | 700 | 23NOV2020 10:40 | Placebo for LY3819253 700 mg |
| 10371008 | 11833581832 | C11_11833581832_324020w_NC11.fastq.gz | P681R | 67.428 | 1621.0 | 2292.1489621489600 | 2.33 | NPH | 14.0 | 2 | 700 | 23NOV2020 10:40 | Placebo for LY3819253 700 mg |
| 10371008 | 11833581832 | C11_11833581832_324020w_NC11.fastq.gz | P681C | 32.449 | 1621.0 | 2292.1489621489600 | 2.33 | NPH | 14.0 | 2 | 700 | 23NOV2020 10:40 | Placebo for LY3819253 700 mg |
| 10371008 | 11833581832 | C11_11833581832_324020w_NC11.fastq.gz | A688V | 33.647 | 1807.0 | 2292.1489621489600 | 2.33 | NPH | 14.0 | 2 | 700 | 23NOV2020 10:40 | Placebo for LY3819253 700 mg |
| 10371008 | 11833581832 | C11_11833581832_324020w_NC11.fastq.gz | Q690_ | 33.459 | 1853.0 | 2292.1489621489600 | 2.33 | NPH | 14.0 | 2 | 700 | 23NOV2020 10:40 | Placebo for LY3819253 700 mg |
| 10371008 | 11833581832 | C11_11833581832_324020w_NC11.fastq.gz | R765C | 33.075 | 904.0  | 2292.1489621489600 | 2.33 | NPH | 14.0 | 2 | 700 | 23NOV2020 10:40 | Placebo for LY3819253 700 mg |
| 10371008 | 11833581832 | C11_11833581832_324020w_NC11.fastq.gz | K814N | 50.0   | 2.0    | 2292.1489621489600 | 2.33 | NPH | 14.0 | 2 | 700 | 23NOV2020 10:40 | Placebo for LY3819253 700 mg |
| 10171007 | 11816856193 | D7_11816856193_324020w_ND7.fastq.gz   | P57L  | 20.632 | 3737.0 | 3181.5539568345300 | 3.39 | NPH | 14.0 | 2 | 700 | 24NOV2020 08:04 | LY3819253 700mg IV           |
| 10171007 | 11816856193 | D7_11816856193_324020w_ND7.fastq.gz   | D614G | 99.886 | 2633.0 | 3181.5539568345300 | 3.39 | NPH | 14.0 | 2 | 700 | 24NOV2020 08:04 | LY3819253 700mg IV           |
| 10331005 | 11856705158 | A2_11856705158_324020w_NA2.fastq.gz   | C391R | 26.029 | 3765.0 | 2247.074572127140  | 2.64 | NPH | 14.0 | 2 | 700 | 06NOV2020 11:21 | LY3819253 700mg IV           |
| 10331005 | 11856705158 | A2_11856705158_324020w_NA2.fastq.gz   | D614G | 99.941 | 1706.0 | 2247.074572127140  | 2.64 | NPH | 14.0 | 2 | 700 | 06NOV2020 11:21 | LY3819253 700mg IV           |
| 10331005 | 11856705158 | A2_11856705158_324020w_NA2.fastq.gz   | S691F | 50.0   | 1378.0 | 2247.074572127140  | 2.64 | NPH | 14.0 | 2 | 700 | 06NOV2020 11:21 | LY3819253 700mg IV           |
| 10331005 | 11856705158 | A2_11856705158_324020w_NA2.fastq.gz   | K814N | 100.0  | 1.0    | 2247.074572127140  | 2.64 | NPH | 14.0 | 2 | 700 | 06NOV2020 11:21 | LY3819253 700mg IV           |
| 10081005 | 11804200712 | 13_00712_322873w_NG11.fastq.gz        | D614G | 100.0  | 1575.0 | 2749.7303921568600 | 2.39 | NPH | 14.0 | 2 | 700 | 05NOV2020 11:12 | LY3819253 700mg IV           |
| 10051005 | 11835723844 | 33_11835723844_323555w_BC9.fastq.gz   | S71P  | 66.454 | 2817.0 | 1608.9201474201500 | 2.36 | NAS | 14.0 | 2 | 700 | 11NOV2020 09:37 | LY3819253 700mg IV           |
| 10051005 | 11835723844 | 33_11835723844_323555w_BC9.fastq.gz   | E484Q | 100.0  | 1570.0 | 1608.9201474201500 | 2.36 | NAS | 14.0 | 2 | 700 | 11NOV2020 09:37 | LY3819253 700mg IV           |
| 10051005 | 11835723844 | 33_11835723844_323555w_BC9.fastq.gz   | D614G | 99.839 | 1240.0 | 1608.9201474201500 | 2.36 | NAS | 14.0 | 2 | 700 | 11NOV2020 09:37 | LY3819253 700mg IV           |
| 10031014 | 11823081546 | 282_11823081546_323348w_NG8.fastq.gz  | E484K | 100.0  | 1268.0 | 774.5144927536230  | 2.0  | NPH | 14.0 | 2 | 700 | 29OCT2020 14:16 | LY3819253 700mg IV           |
| 10031014 | 11823081546 | 282_11823081546_323348w_NG8.fastq.gz  | T500I | 23.1   | 1342.0 | 774.5144927536230  | 2.0  | NPH | 14.0 | 2 | 700 | 29OCT2020 14:16 | LY3819253 700mg IV           |
| 10031014 | 11823081546 | 282_11823081546_323348w_NG8.fastq.gz  | N536D | 25.113 | 1103.0 | 774.5144927536230  | 2.0  | NPH | 14.0 | 2 | 700 | 29OCT2020 14:16 | LY3819253 700mg IV           |
| 10031014 | 11823081546 | 282_11823081546_323348w_NG8.fastq.gz  | E554_ | 23.25  | 843.0  | 774.5144927536230  | 2.0  | NPH | 14.0 | 2 | 700 | 29OCT2020 14:16 | LY3819253 700mg IV           |
| 10031014 | 11823081546 | 282_11823081546_323348w_NG8.fastq.gz  | D614G | 99.796 | 489.0  | 774.5144927536230  | 2.0  | NPH | 14.0 | 2 | 700 | 29OCT2020 14:16 | LY3819253 700mg IV           |
| 10031014 | 11823081546 | 282_11823081546_323348w_NG8.fastq.gz  | I805T | 39.216 | 153.0  | 774.5144927536230  | 2.0  | NPH | 14.0 | 2 | 700 | 29OCT2020 14:16 | LY3819253 700mg IV           |
| 10491006 | 11852450498 | 99_11852450498_323348w_NC3.fastq.gz   | D614G | 99.93  | 1429.0 | 2577.742718446600  | 2.2  | NPH | 14.0 | 2 | 700 | 24NOV2020 09:33 | LY3819253 700mg IV           |
| 10561003 | 11812589120 | 104_11812589120_323348w_NC6.fastq.gz  | D614G | 99.689 | 644.0  | 1250.0485436893200 | 2.24 | NPH | 14.0 | 2 | 700 | 08NOV2020 09:28 | Placebo for LY3819253 700 mg |
| 10561003 | 11812589120 | 104_11812589120_323348w_NC6.fastq.gz  | Y660H | 36.349 | 619.0  | 1250.0485436893200 | 2.24 | NPH | 14.0 | 2 | 700 | 08NOV2020 09:28 | Placebo for LY3819253 700 mg |
| 10561003 | 11812589120 | 104_11812589120_323348w_NC6.fastq.gz  | N710D | 37.0   | 600.0  | 1250.0485436893200 | 2.24 | NPH | 14.0 | 2 | 700 | 08NOV2020 09:28 | Placebo for LY3819253 700 mg |
| 10491002 | 11852526351 | 127_11852526351_323348w_ND9.fastq.gz  | H519Y | 29.552 | 4284.0 | 2913.1756097561000 | 3.33 | NAS | 14.0 | 2 | 700 | 12NOV2020 11:33 | Placebo for LY3819253 700 mg |
| 10491002 | 11852526351 | 127_11852526351_323348w_ND9.fastq.gz  | D614G | 99.943 | 1755.0 | 2913.1756097561000 | 3.33 | NAS | 14.0 | 2 | 700 | 12NOV2020 11:33 | Placebo for LY3819253 700 mg |
| 10491002 | 11852526351 | 127_11852526351_323348w_ND9.fastq.gz  | A701V | 24.322 | 1328.0 | 2913.1756097561000 | 3.33 | NAS | 14.0 | 2 | 700 | 12NOV2020 11:33 | Placebo for LY3819253 700 mg |
| 10121009 | 11854610824 | 171_11854610824_323348w_NF6.fastq.gz  | D614G | 99.777 | 897.0  | 1606.4043583535100 | 3.14 | NPH | 14.0 | 2 | 700 | 24NOV2020 11:58 | Placebo for LY3819253 700 mg |
| 11061001 | 11821055311 | 95_11821055311_323348w_NC1.fastq.gz   | D614G | 99.797 | 493.0  | 8                  |      |     |      |   |     |                 |                              |

|          |             |                                       |         |        |         |                    |      |     |      |   |     |                 |                              |
|----------|-------------|---------------------------------------|---------|--------|---------|--------------------|------|-----|------|---|-----|-----------------|------------------------------|
| 10021004 | 11833555267 | B11_11833555267_323524w_BB11.fastq.gz | E484K   | 50.707 | 1203.0  | 1382.8021978022000 | 2.38 | NPH | 14.0 | 2 | 700 | 02NOV2020 11:46 | LY3819253 700mg IV           |
| 10021004 | 11833555267 | B11_11833555267_323524w_BB11.fastq.gz | E484Q   | 49.21  | 1203.0  | 1382.8021978022000 | 2.38 | NPH | 14.0 | 2 | 700 | 02NOV2020 11:46 | LY3819253 700mg IV           |
| 10021004 | 11833555267 | B11_11833555267_323524w_BB11.fastq.gz | D614G   | 100.0  | 978.0   | 1382.8021978022000 | 2.38 | NPH | 14.0 | 2 | 700 | 02NOV2020 11:46 | LY3819253 700mg IV           |
| 10421009 | 11852452545 | F6_11852452545_323524w_BF6.fastq.gz   | D614G   | 100.0  | 832.0   | 1056.4748466257700 | 2.69 | NPH | 14.0 | 2 | 700 | 05NOV2020 13:06 | Placebo for LY3819253 700 mg |
| 10421009 | 11852452545 | F6_11852452545_323524w_BF6.fastq.gz   | K814I   | 100.0  | 1.0     | 1056.4748466257700 | 2.69 | NPH | 14.0 | 2 | 700 | 05NOV2020 13:06 | Placebo for LY3819253 700 mg |
| 10421015 | 11814685708 | 8_11814685708_323232w_AA8.fastq.gz    | K417N   | 21.548 | 1137.0  | 1191.7325153374200 | 2.59 | NPH | 14.0 | 2 | 700 | 18NOV2020 09:13 | Placebo for LY3819253 700 mg |
| 10421015 | 11814685708 | 8_11814685708_323232w_AA8.fastq.gz    | D614G   | 99.791 | 958.0   | 1191.7325153374200 | 2.59 | NPH | 14.0 | 2 | 700 | 18NOV2020 09:13 | Placebo for LY3819253 700 mg |
| 10421015 | 11814685708 | 8_11814685708_323232w_AA8.fastq.gz    | T791I   | 25.234 | 428.0   | 1191.7325153374200 | 2.59 | NPH | 14.0 | 2 | 700 | 18NOV2020 09:13 | Placebo for LY3819253 700 mg |
| 10491001 | 11852449739 | 89_11852449739_323232w_AH5.fastq.gz   | D614G   | 99.858 | 2820.0  | 3458.036540803900  | 3.29 | NPH | 14.0 | 2 | 700 | 11NOV2020 09:22 | Placebo for LY3819253 700 mg |
| 10491001 | 11852449739 | 89_11852449739_323232w_AH5.fastq.gz   | Y674F   | 99.725 | 2178.0  | 3458.036540803900  | 3.29 | NPH | 14.0 | 2 | 700 | 11NOV2020 09:22 | Placebo for LY3819253 700 mg |
| 10021004 | 11833555265 | 77_55265_322847w_BG5.fastq.gz         | P9L     | 99.89  | 10000.0 | 1250.2600732600700 | 3.81 | NAS | 14.0 | 2 | 700 | 02NOV2020 11:45 | LY3819253 700mg IV           |
| 10021004 | 11833555265 | 77_55265_322847w_BG5.fastq.gz         | S254F   | 99.874 | 794.0   | 1250.2600732600700 | 3.81 | NAS | 14.0 | 2 | 700 | 02NOV2020 11:45 | LY3819253 700mg IV           |
| 10021004 | 11833555265 | 77_55265_322847w_BG5.fastq.gz         | E484Q   | 99.886 | 876.0   | 1250.2600732600700 | 3.81 | NAS | 14.0 | 2 | 700 | 02NOV2020 11:45 | LY3819253 700mg IV           |
| 10021004 | 11833555265 | 77_55265_322847w_BG5.fastq.gz         | D614G   | 99.854 | 687.0   | 1250.2600732600700 | 3.81 | NAS | 14.0 | 2 | 700 | 02NOV2020 11:45 | LY3819253 700mg IV           |
| 10251006 | 11818954760 | 63_54760_322847w_BF3.fastq.gz         | D614G   | 99.811 | 1587.0  | 1967.9162621359200 | 2.67 | NPH | 14.0 | 2 | 700 | 29OCT2020 08:58 | Placebo for LY3819253 700 mg |
| 10251006 | 11818954760 | 63_54760_322847w_BF3.fastq.gz         | K814I   | 50.0   | 2.0     | 1967.9162621359200 | 2.67 | NPH | 14.0 | 2 | 700 | 29OCT2020 08:58 | Placebo for LY3819253 700 mg |
| 10011018 | 11854553102 | 44_53102_322847w_BD8.fastq.gz         | D614G   | 99.613 | 1292.0  | 1712.0559610705600 | 3.24 | NPH | 14.0 | 2 | 700 | 18NOV2020 10:00 | Placebo for LY3819253 700 mg |
| 10051006 | 11835724623 | 41_24623_322847w_BD5.fastq.gz         | D614G   | 99.832 | 1190.0  | 1499.5236938031600 | 2.65 | NPH | 14.0 | 2 | 700 | 11NOV2020 09:52 | LY3819253 700mg IV           |
| 10011014 | 11823141900 | 73_41900_322847w_BG1.fastq.gz         | D614G   | 99.715 | 1052.0  | 1269.8149466192200 | 4.55 | NPH | 14.0 | 2 | 700 | 04NOV2020 14:15 | LY3819253 700mg IV           |
| 10011015 | 11823141895 | 19_41895_322847w_BB7.fastq.gz         | E484K   | 99.764 | 2118.0  | 2275.534229828850  | 4.27 | NPH | 14.0 | 2 | 700 | 10NOV2020 08:11 | LY3819253 700mg IV           |
| 10011015 | 11823141895 | 19_41895_322847w_BB7.fastq.gz         | D614G   | 99.768 | 1727.0  | 2275.534229828850  | 4.27 | NPH | 14.0 | 2 | 700 | 10NOV2020 08:11 | LY3819253 700mg IV           |
| 10041005 | 11802102286 | 37_02286_322847w_BD1.fastq.gz         | D614G   | 99.792 | 961.0   | 1210.6474201474200 | 2.94 | NPH | 14.0 | 2 | 700 | 12NOV2020 11:20 | Placebo for LY3819253 700 mg |
| 10051009 | 11841962696 | G5_11841962696_324019w_CG5.fastq.gz   | E484K   | 99.816 | 3258.0  | 2032.0737100737100 | 6.62 | NPH | 14.0 | 2 | 700 | 30NOV2020 13:05 | LY3819253 700mg IV           |
| 10051009 | 11841962696 | G5_11841962696_324019w_CG5.fastq.gz   | D614G   | 99.841 | 1257.0  | 2032.0737100737100 | 6.62 | NPH | 14.0 | 2 | 700 | 30NOV2020 13:05 | LY3819253 700mg IV           |
| 10331001 | 11839924226 | 14_11839924226_323283w_CE12.fastq.gz  | D614G   | 100.0  | 420.0   | 522.097205346294   | 3.44 | NPH | 14.0 | 2 | 700 | 28OCT2020 13:11 | LY3819253 700mg IV           |
| 10951002 | 11804226700 | A7_11804226700_323690w_BA7.fastq.gz   | P463L   | 99.951 | 2055.0  | 2024.2253694581300 | 2.09 | NPH | 14.0 | 2 | 700 | 23NOV2020 09:25 | LY3819253 700mg IV           |
| 10951002 | 11804226700 | A7_11804226700_323690w_BA7.fastq.gz   | D614G   | 99.77  | 1740.0  | 2024.2253694581300 | 2.09 | NPH | 14.0 | 2 | 700 | 23NOV2020 09:25 | LY3819253 700mg IV           |
| 10201008 | 11818966599 | B2_11818966599_323692w_NB2.fastq.gz   | E484K   | 99.717 | 2830.0  | 2734.192918192920  | 4.59 | NAS | 14.0 | 2 | 700 | 05NOV2020 09:45 | LY3819253 700mg IV           |
| 10201008 | 11818966599 | B2_11818966599_323692w_NB2.fastq.gz   | D614G   | 99.872 | 2345.0  | 2734.192918192920  | 4.59 | NAS | 14.0 | 2 | 700 | 05NOV2020 09:45 | LY3819253 700mg IV           |
| 10201008 | 11818966599 | B2_11818966599_323692w_NB2.fastq.gz   | P681R   | 99.846 | 1950.0  | 2734.192918192920  | 4.59 | NAS | 14.0 | 2 | 700 | 05NOV2020 09:45 | LY3819253 700mg IV           |
| 10051009 | 11808474059 | D11_11808474059_323692w_ND11.fastq.gz | E484K   | 99.817 | 2732.0  | 3063.952029520300  | 2.74 | NAS | 14.0 | 2 | 700 | 30NOV2020 13:05 | LY3819253 700mg IV           |
| 10051009 | 11808474059 | D11_11808474059_323692w_ND11.fastq.gz | D614G   | 99.783 | 2306.0  | 3063.952029520300  | 2.74 | NAS | 14.0 | 2 | 700 | 30NOV2020 13:05 | LY3819253 700mg IV           |
| 10251008 | 11818906119 | C9_11818906119_323692w_NC9.fastq.gz   | E484K   | 84.262 | 2942.0  | 2937.923264311820  | 3.7  | NAS | 14.0 | 2 | 700 | 09NOV2020 11:05 | LY3819253 700mg IV           |
| 10251008 | 11818906119 | C9_11818906119_323692w_NC9.fastq.gz   | D614G   | 99.504 | 2219.0  | 2937.923264311820  | 3.7  | NAS | 14.0 | 2 | 700 | 09NOV2020 11:05 | LY3819253 700mg IV           |
| 10131011 | 11850408452 | 80_11850408452_323231w_NG8.fastq.gz   | D614G   | 99.928 | 1391.0  | 1813.4501800720300 | 3.02 | NAS | 14.0 | 2 | 700 | 24NOV2020 11:11 | Placebo for LY3819253 700 mg |
| 10131011 | 11850408452 | 80_11850408452_323231w_NG8.fastq.gz   | K814N   | 50.0   | 2.0     | 1813.4501800720300 | 3.02 | NAS | 14.0 | 2 | 700 | 24NOV2020 11:11 | Placebo for LY3819253 700 mg |
| 10201010 | 11818967111 | 11_11818967111_323231w_NA11.fastq.gz  | D614G   | 99.701 | 1003.0  | 1622.0012195122000 | 4.51 | NPH | 14.0 | 2 | 700 | 04NOV2020 10:30 | Placebo for LY3819253 700 mg |
| 10061007 | 11804262988 | 90_11804262988_323231w_NH6.fastq.gz   | P322S   | 99.835 | 3032.0  | 3136.5591133004900 | 2.5  | NPH | 14.0 | 2 | 700 | 23NOV2020 15:52 | Placebo for LY3819253 700 mg |
| 10061007 | 11804262988 | 90_11804262988_323231w_NH6.fastq.gz   | D614G   | 100.0  | 2294.0  | 3136.5591133004900 | 2.5  | NPH | 14.0 | 2 | 700 | 23NOV2020 15:52 | Placebo for LY3819253 700 mg |
| 10061007 | 11804262988 | 90_11804262988_323231w_NH6.fastq.gz   | S637F   | 99.819 | 2210.0  | 3136.5591133004900 | 2.5  | NPH | 14.0 | 2 | 700 | 23NOV2020 15:52 | Placebo for LY3819253 700 mg |
| 10121006 | 11804198208 | 64_11804198208_323231w_NF4.fastq.gz   | G413E   | 57.584 | 1101.0  | 1138.1370869033000 | 2.87 | NPH | 14.0 | 2 | 700 | 14NOV2020 12:40 | LY3819253 700mg IV           |
| 10121006 | 11804198208 | 64_11804198208_323231w_NF4.fastq.gz   | R457W   | 56.64  | 1107.0  | 1138.1370869033000 | 2.87 | NPH | 14.0 | 2 | 700 | 14NOV2020 12:40 | LY3819253 700mg IV           |
| 10121006 | 11804198208 | 64_11804198208_323231w_NF4.fastq.gz   | K558N   | 54.289 | 851.0   | 1138.1370869033000 | 2.87 | NPH | 14.0 | 2 | 700 | 14NOV2020 12:40 | LY3819253 700mg IV           |
| 10121006 | 11804198208 | 64_11804198208_323231w_NF4.fastq.gz   | D614G   | 99.727 | 732.0   | 1138.1370869033000 | 2.87 | NPH | 14.0 | 2 | 700 | 14NOV2020 12:40 | LY3819253 700mg IV           |
| 10121006 | 11804198208 | 64_11804198208_323231w_NF4.fastq.gz   | Q644_   | 44.18  | 713.0   | 1138.1370869033000 | 2.87 | NPH | 14.0 | 2 | 700 | 14NOV2020 12:40 | LY3819253 700mg IV           |
| 10251008 | 11818904581 | 76_11818904581_323231w_NG4.fastq.gz   | E484K   | 99.774 | 1327.0  | 1379.5733496332500 | 4.56 | NPH | 14.0 | 2 | 700 | 09NOV2020 11:04 | LY3819253 700mg IV           |
| 10251008 | 11818904581 | 76_11818904581_323231w_NG4.fastq.gz   | D614G   | 99.886 | 880.0   | 1379.5733496332500 | 4.56 | NPH | 14.0 | 2 | 700 | 09NOV2020 11:04 | LY3819253 700mg IV           |
| 10331007 | 11814691722 | 82_11814691722_323231w_NG10.fastq.gz  | D614G   | 99.871 | 3098.0  | 4194.777641277640  | 2.54 | NPH | 14.0 | 2 | 700 | 23NOV2020 08:38 | LY3819253 700mg IV           |
| 10201008 | 11818965061 | 14_11818965061_323231w_NB2.fastq.gz   | E484K   | 99.439 | 3389.0  | 3026.071090047390  | 6.22 | NPH | 14.0 | 2 | 700 | 05NOV2020 09:46 | LY3819253 700mg IV           |
| 10201008 | 11818965061 | 14_11818965061_323231w_NB2.fastq.gz   | D614G   | 99.884 | 2584.0  | 3026.071090047390  | 6.22 | NPH | 14.0 | 2 | 700 | 05NOV2020 09:46 | LY3819253 700mg IV           |
| 10201008 | 11818965061 | 14_11818965061_323231w_NB2.fastq.gz   | P681R   | 99.902 | 2037.0  | 3026.071090047390  | 6.22 | NPH | 14.0 | 2 | 700 | 05NOV2020 09:46 | LY3819253 700mg IV           |
| 10161007 | 11848329548 | D5_11848329548_324020w_ND5.fastq.gz   | K786R   | 1.876  | 853.0   | 2263.1323529411800 | 2.59 | NPH | 14.0 | 2 | 700 | 24NOV2020 09:21 | LY3819253 700mg IV           |
| 10051004 | 11835724366 | G1_11835724366_324020w_NG1.fastq.gz   | E471K   | 17.36  | 4689.0  | 2299.6053921568600 | 2.21 | NPH | 14.0 | 2 | 700 | 05NOV2020 11:00 | LY3819253 700mg IV           |
| 10691001 | 11802170759 | F10_11802170759_324020w_NF10.fastq.gz | A243S   | 12.857 | 770.0   | 1767.1609336609300 | 3.23 | NPH | 14.0 | 2 | 700 | 18NOV2020 15:38 | Placebo for LY3819253 700 mg |
| 10201007 | 11818965060 | H1_11818965060_324020w_NH1.fastq.gz   | Q23_    | 12.221 | 3355.0  | 2351.842490842490  | 3.01 | NPH | 14.0 | 2 | 700 | 29OCT2020 07:46 | LY3819253 700mg IV           |
| 10201007 | 11818965060 | H1_11818965060_324020w_NH1.fastq.gz   | S151I   | 9.142  | 886.0   | 2351.842490842490  | 3.01 | NPH | 14.0 | 2 | 700 | 29OCT2020 07:46 | LY3819253 700mg IV           |
| 10201007 | 11818965060 | H1_11818965060_324020w_NH1.fastq.gz   | S637F   | 11.434 | 2274.0  | 2351.842490842490  | 3.01 | NPH | 14.0 | 2 | 700 | 29OCT2020 07:46 | LY3819253 700mg IV           |
| 10171007 | 11816856193 | D7_11816856193_324020w_ND7.fastq.gz   | L24S    | 2.725  | 6532.0  | 3181.5539568345300 | 3.39 | NPH | 14.0 | 2 | 700 | 24NOV2020 08:04 | LY3819253 700mg IV           |
| 10171007 | 11816856193 | D7_11816856193_324020w_ND7.fastq.gz   | T307I   | 11.251 | 2222.0  | 3181.5539568345300 | 3.39 | NPH | 14.0 | 2 | 700 | 24NOV2020 08:04 | LY3819253 700mg IV           |
| 10171007 | 11816856193 | D7_11816856193_324020w_ND7.fastq.gz   | E406D   | 5.615  | 5272.0  | 3181.5539568345300 | 3.39 | NPH | 14.0 | 2 | 700 | 24NOV2020 08:04 | LY3819253 700mg IV           |
| 10171007 | 11816856193 | D7_11816856193_324020w_ND7.fastq.gz   | L552I   | 14.739 | 3623.0  | 3181.5539568345300 | 3.39 | NPH | 14.0 | 2 | 700 | 24NOV2020 08:04 | LY3819253 700mg IV           |
| 10171007 | 11816856193 | D7_11816856193_324020w_ND7.fastq.gz   | S637del | 1.561  | 2691.0  | 3181.5539568345300 | 3.39 | NPH | 14.0 | 2 | 700 | 24NOV2020 08:04 | LY3819253 700mg IV           |
| 10171007 | 11816856193 | D7_11816856193_324020w_ND7.fastq.gz   | T638del | 1.524  | 2691.0  | 3181.5539568345300 | 3.39 | NPH | 14.0 | 2 | 700 | 24NOV2020 08:04 | LY3819253 700mg IV           |
| 10171007 | 11816856193 | D7_11816856193_324020w_ND7.fastq.gz   | P665del | 1.032  | 2035.0  | 3181.5539568345300 | 3.39 | NPH | 14.0 | 2 | 700 |                 |                              |

|          |             |                                       |       |        |         |                    |      |     |      |   |     |                 |                              |
|----------|-------------|---------------------------------------|-------|--------|---------|--------------------|------|-----|------|---|-----|-----------------|------------------------------|
| 10081005 | 11804200712 | 13_00712_322873w_NG11.fastq.gz        | G485V | 13.239 | 3550.0  | 2749.7303921568600 | 2.39 | NPH | 14.0 | 2 | 700 | 05NOV2020 11:12 | LY3819253 700mg IV           |
| 10081005 | 11804200712 | 13_00712_322873w_NG11.fastq.gz        | L513F | 14.378 | 3255.0  | 2749.7303921568600 | 2.39 | NPH | 14.0 | 2 | 700 | 05NOV2020 11:12 | LY3819253 700mg IV           |
| 10031014 | 11823081546 | 282_11823081546_323348w_NG8.fastq.gz  | T430P | 1.215  | 2470.0  | 774.5144927536230  | 2.0  | NPH | 14.0 | 2 | 700 | 29OCT2020 14:16 | LY3819253 700mg IV           |
| 10031014 | 11823081546 | 282_11823081546_323348w_NG8.fastq.gz  | C760Y | 1.031  | 97.0    | 774.5144927536230  | 2.0  | NPH | 14.0 | 2 | 700 | 29OCT2020 14:16 | LY3819253 700mg IV           |
| 10491006 | 11852450498 | 99_11852450498_323348w_NC3.fastq.gz   | T430P | 1.334  | 6823.0  | 2577.742718446600  | 2.2  | NPH | 14.0 | 2 | 700 | 24NOV2020 09:33 | LY3819253 700mg IV           |
| 10491006 | 11852450498 | 99_11852450498_323348w_NC3.fastq.gz   | Y789D | 1.45   | 2690.0  | 2577.742718446600  | 2.2  | NPH | 14.0 | 2 | 700 | 24NOV2020 09:33 | LY3819253 700mg IV           |
| 10561003 | 11812589120 | 104_11812589120_323348w_NC6.fastq.gz  | T430P | 1.429  | 4058.0  | 1250.0485436893200 | 2.24 | NPH | 14.0 | 2 | 700 | 08NOV2020 09:28 | Placebo for LY3819253 700 mg |
| 10561003 | 11812589120 | 104_11812589120_323348w_NC6.fastq.gz  | Y789D | 1.014  | 690.0   | 1250.0485436893200 | 2.24 | NPH | 14.0 | 2 | 700 | 08NOV2020 09:28 | Placebo for LY3819253 700 mg |
| 10491002 | 11852526351 | 127_11852526351_323348w_ND9.fastq.gz  | T430P | 1.539  | 9485.0  | 2913.1756097561000 | 3.33 | NAS | 14.0 | 2 | 700 | 12NOV2020 11:33 | Placebo for LY3819253 700 mg |
| 10491002 | 11852526351 | 127_11852526351_323348w_ND9.fastq.gz  | F718L | 18.207 | 1093.0  | 2913.1756097561000 | 3.33 | NAS | 14.0 | 2 | 700 | 12NOV2020 11:33 | Placebo for LY3819253 700 mg |
| 10121009 | 11854610824 | 171_11854610824_323348w_NF6.fastq.gz  | T430P | 1.842  | 5484.0  | 1606.4043583535100 | 3.14 | NPH | 14.0 | 2 | 700 | 24NOV2020 11:58 | Placebo for LY3819253 700 mg |
| 10121009 | 11854610824 | 171_11854610824_323348w_NF6.fastq.gz  | P507L | 14.806 | 2580.0  | 1606.4043583535100 | 3.14 | NPH | 14.0 | 2 | 700 | 24NOV2020 11:58 | Placebo for LY3819253 700 mg |
| 10121009 | 11854610824 | 171_11854610824_323348w_NF6.fastq.gz  | E583G | 15.829 | 1055.0  | 1606.4043583535100 | 3.14 | NPH | 14.0 | 2 | 700 | 24NOV2020 11:58 | Placebo for LY3819253 700 mg |
| 10121009 | 11854610824 | 171_11854610824_323348w_NF6.fastq.gz  | T723I | 18.115 | 541.0   | 1606.4043583535100 | 3.14 | NPH | 14.0 | 2 | 700 | 24NOV2020 11:58 | Placebo for LY3819253 700 mg |
| 11061001 | 11821055311 | 95_11821055311_323348w_NC1.fastq.gz   | T430P | 1.355  | 2509.0  | 877.9756097560980  | 2.23 | NPH | 14.0 | 2 | 700 | 18NOV2020 15:00 | LY3819253 700mg IV           |
| 11061001 | 11821055311 | 95_11821055311_323348w_NC1.fastq.gz   | Y789D | 1.346  | 743.0   | 877.9756097560980  | 2.23 | NPH | 14.0 | 2 | 700 | 18NOV2020 15:00 | LY3819253 700mg IV           |
| 10371001 | 11844040393 | 181_11844040393_323348w_NF8.fastq.gz  | T430P | 1.325  | 5283.0  | 1488.6824644549800 | 2.36 | NPH | 14.0 | 2 | 700 | 12NOV2020 12:05 | LY3819253 700mg IV           |
| 10371001 | 11844040393 | 181_11844040393_323348w_NF8.fastq.gz  | S555F | 10.687 | 1675.0  | 1488.6824644549800 | 2.36 | NPH | 14.0 | 2 | 700 | 12NOV2020 12:05 | LY3819253 700mg IV           |
| 10371001 | 11844040393 | 181_11844040393_323348w_NF8.fastq.gz  | P621S | 11.882 | 850.0   | 1488.6824644549800 | 2.36 | NPH | 14.0 | 2 | 700 | 12NOV2020 12:05 | LY3819253 700mg IV           |
| 10371001 | 11844040393 | 181_11844040393_323348w_NF8.fastq.gz  | P665S | 10.594 | 623.0   | 1488.6824644549800 | 2.36 | NPH | 14.0 | 2 | 700 | 12NOV2020 12:05 | LY3819253 700mg IV           |
| 10371001 | 11844040393 | 181_11844040393_323348w_NF8.fastq.gz  | V729A | 9.091  | 363.0   | 1488.6824644549800 | 2.36 | NPH | 14.0 | 2 | 700 | 12NOV2020 12:05 | LY3819253 700mg IV           |
| 10371001 | 11844040393 | 181_11844040393_323348w_NF8.fastq.gz  | C749_ | 7.391  | 230.0   | 1488.6824644549800 | 2.36 | NPH | 14.0 | 2 | 700 | 12NOV2020 12:05 | LY3819253 700mg IV           |
| 10371001 | 11844040393 | 181_11844040393_323348w_NF8.fastq.gz  | K786R | 1.309  | 382.0   | 1488.6824644549800 | 2.36 | NPH | 14.0 | 2 | 700 | 12NOV2020 12:05 | LY3819253 700mg IV           |
| 10161005 | 11852444230 | 67_11852444230_323348w_NB4.fastq.gz   | T430P | 1.819  | 2639.0  | 765.7907542579080  | 2.18 | NPH | 14.0 | 2 | 700 | 13NOV2020 09:50 | Placebo for LY3819253 700 mg |
| 10161005 | 11852444230 | 67_11852444230_323348w_NB4.fastq.gz   | Y789D | 1.111  | 270.0   | 765.7907542579080  | 2.18 | NPH | 14.0 | 2 | 700 | 13NOV2020 09:50 | Placebo for LY3819253 700 mg |
| 10201013 | 11846228485 | 41_11846228485_323348w_NA9.fastq.gz   | T430P | 1.994  | 2457.0  | 780.5634146341460  | 2.09 | NPH | 14.0 | 2 | 700 | 12NOV2020 11:32 | LY3819253 700mg IV           |
| 10201013 | 11846228485 | 41_11846228485_323348w_NA9.fastq.gz   | T430A | 1.058  | 2457.0  | 780.5634146341460  | 2.09 | NPH | 14.0 | 2 | 700 | 12NOV2020 11:32 | LY3819253 700mg IV           |
| 10561004 | 11812654339 | B4_11812654339_324017w_AG4.fastq.gz   | H146Q | 1.02   | 294.0   | 668.638036809816   | 2.02 | NPH | 14.0 | 2 | 700 | 08NOV2020 09:13 | Placebo for LY3819253 700 mg |
| 10561004 | 11812654339 | B4_11812654339_324017w_AG4.fastq.gz   | V433I | 1.775  | 2253.0  | 668.638036809816   | 2.02 | NPH | 14.0 | 2 | 700 | 08NOV2020 09:13 | Placebo for LY3819253 700 mg |
| 10561004 | 11812654339 | B4_11812654339_324017w_AG4.fastq.gz   | K786R | 1.064  | 282.0   | 668.638036809816   | 2.02 | NPH | 14.0 | 2 | 700 | 08NOV2020 09:13 | Placebo for LY3819253 700 mg |
| 10021004 | 11833555267 | B11_11833555267_323524w_BB11.fastq.gz | Y144F | 1.081  | 555.0   | 1382.8021978022000 | 2.38 | NPH | 14.0 | 2 | 700 | 02NOV2020 11:46 | LY3819253 700mg IV           |
| 10421015 | 11814685708 | 8_11814685708_323232w_AA8.fastq.gz    | S691F | 19.471 | 719.0   | 1191.7325153374200 | 2.59 | NPH | 14.0 | 2 | 700 | 18NOV2020 09:13 | Placebo for LY3819253 700 mg |
| 10491001 | 11852449739 | 89_11852449739_323232w_AH5.fastq.gz   | N17S  | 1.16   | 10000.0 | 3458.036540803900  | 3.29 | NPH | 14.0 | 2 | 700 | 11NOV2020 09:22 | Placebo for LY3819253 700 mg |
| 10491001 | 11852449739 | 89_11852449739_323232w_AH5.fastq.gz   | A27V  | 2.95   | 10000.0 | 3458.036540803900  | 3.29 | NPH | 14.0 | 2 | 700 | 11NOV2020 09:22 | Placebo for LY3819253 700 mg |
| 10491001 | 11852449739 | 89_11852449739_323232w_AH5.fastq.gz   | V36G  | 1.273  | 9508.0  | 3458.036540803900  | 3.29 | NPH | 14.0 | 2 | 700 | 11NOV2020 09:22 | Placebo for LY3819253 700 mg |
| 10491001 | 11852449739 | 89_11852449739_323232w_AH5.fastq.gz   | V130I | 1.008  | 3075.0  | 3458.036540803900  | 3.29 | NPH | 14.0 | 2 | 700 | 11NOV2020 09:22 | Placebo for LY3819253 700 mg |
| 10491001 | 11852449739 | 89_11852449739_323232w_AH5.fastq.gz   | L441I | 1.153  | 3555.0  | 3458.036540803900  | 3.29 | NPH | 14.0 | 2 | 700 | 11NOV2020 09:22 | Placebo for LY3819253 700 mg |
| 10491001 | 11852449739 | 89_11852449739_323232w_AH5.fastq.gz   | G496V | 1.27   | 3544.0  | 3458.036540803900  | 3.29 | NPH | 14.0 | 2 | 700 | 11NOV2020 09:22 | Placebo for LY3819253 700 mg |
| 10491001 | 11852449739 | 89_11852449739_323232w_AH5.fastq.gz   | V524A | 1.173  | 3410.0  | 3458.036540803900  | 3.29 | NPH | 14.0 | 2 | 700 | 11NOV2020 09:22 | Placebo for LY3819253 700 mg |
| 10491001 | 11852449739 | 89_11852449739_323232w_AH5.fastq.gz   | P715T | 1.356  | 1770.0  | 3458.036540803900  | 3.29 | NPH | 14.0 | 2 | 700 | 11NOV2020 09:22 | Placebo for LY3819253 700 mg |
| 10021004 | 11833555265 | 77_55265_322847w_BG5.fastq.gz         | G799D | 1.036  | 579.0   | 1250.2600732600700 | 3.81 | NAS | 14.0 | 2 | 700 | 02NOV2020 11:45 | LY3819253 700mg IV           |
| 10251006 | 11818954760 | 63_54760_322847w_BF3.fastq.gz         | N81D  | 9.14   | 2429.0  | 1967.9162621359200 | 2.67 | NPH | 14.0 | 2 | 700 | 29OCT2020 08:58 | Placebo for LY3819253 700 mg |
| 10251006 | 11818954760 | 63_54760_322847w_BF3.fastq.gz         | P579L | 17.758 | 1650.0  | 1967.9162621359200 | 2.67 | NPH | 14.0 | 2 | 700 | 29OCT2020 08:58 | Placebo for LY3819253 700 mg |
| 10251006 | 11818954760 | 63_54760_322847w_BF3.fastq.gz         | G648V | 18.328 | 1435.0  | 1967.9162621359200 | 2.67 | NPH | 14.0 | 2 | 700 | 29OCT2020 08:58 | Placebo for LY3819253 700 mg |
| 10251006 | 11818954760 | 63_54760_322847w_BF3.fastq.gz         | A713V | 12.285 | 1164.0  | 1967.9162621359200 | 2.67 | NPH | 14.0 | 2 | 700 | 29OCT2020 08:58 | Placebo for LY3819253 700 mg |
| 10011018 | 11854553102 | 44_53102_322847w_BD8.fastq.gz         | L176F | 17.124 | 1495.0  | 1712.0559610705600 | 3.24 | NPH | 14.0 | 2 | 700 | 18NOV2020 10:00 | Placebo for LY3819253 700 mg |
| 10011018 | 11854553102 | 44_53102_322847w_BD8.fastq.gz         | Y380F | 16.296 | 1663.0  | 1712.0559610705600 | 3.24 | NPH | 14.0 | 2 | 700 | 18NOV2020 10:00 | Placebo for LY3819253 700 mg |
| 10011018 | 11854553102 | 44_53102_322847w_BD8.fastq.gz         | A688V | 16.044 | 910.0   | 1712.0559610705600 | 3.24 | NPH | 14.0 | 2 | 700 | 18NOV2020 10:00 | Placebo for LY3819253 700 mg |
| 10051006 | 11835724623 | 41_24623_322847w_BD5.fastq.gz         | S297L | 3.885  | 1467.0  | 1499.5236938031600 | 2.65 | NPH | 14.0 | 2 | 700 | 11NOV2020 09:52 | LY3819253 700mg IV           |
| 10051006 | 11835724623 | 41_24623_322847w_BD5.fastq.gz         | N343Y | 6.644  | 1445.0  | 1499.5236938031600 | 2.65 | NPH | 14.0 | 2 | 700 | 11NOV2020 09:52 | LY3819253 700mg IV           |
| 10051006 | 11835724623 | 41_24623_322847w_BD5.fastq.gz         | A653S | 8.216  | 998.0   | 1499.5236938031600 | 2.65 | NPH | 14.0 | 2 | 700 | 11NOV2020 09:52 | LY3819253 700mg IV           |
| 10051006 | 11835724623 | 41_24623_322847w_BD5.fastq.gz         | A706P | 6.511  | 814.0   | 1499.5236938031600 | 2.65 | NPH | 14.0 | 2 | 700 | 11NOV2020 09:52 | LY3819253 700mg IV           |
| 10011014 | 11823141900 | 73_41900_322847w_BG1.fastq.gz         | V83A  | 1.412  | 1487.0  | 1269.8149466192200 | 4.55 | NPH | 14.0 | 2 | 700 | 04NOV2020 14:15 | LY3819253 700mg IV           |
| 10011014 | 11823141900 | 73_41900_322847w_BG1.fastq.gz         | T109I | 1.564  | 1279.0  | 1269.8149466192200 | 4.55 | NPH | 14.0 | 2 | 700 | 04NOV2020 14:15 | LY3819253 700mg IV           |
| 10011014 | 11823141900 | 73_41900_322847w_BG1.fastq.gz         | T124N | 1.31   | 1145.0  | 1269.8149466192200 | 4.55 | NPH | 14.0 | 2 | 700 | 04NOV2020 14:15 | LY3819253 700mg IV           |
| 10011014 | 11823141900 | 73_41900_322847w_BG1.fastq.gz         | N148K | 1.17   | 1111.0  | 1269.8149466192200 | 4.55 | NPH | 14.0 | 2 | 700 | 04NOV2020 14:15 | LY3819253 700mg IV           |
| 10011014 | 11823141900 | 73_41900_322847w_BG1.fastq.gz         | S221L | 1.659  | 1145.0  | 1269.8149466192200 | 4.55 | NPH | 14.0 | 2 | 700 | 04NOV2020 14:15 | LY3819253 700mg IV           |
| 10011014 | 11823141900 | 73_41900_322847w_BG1.fastq.gz         | G311_ | 2.709  | 1292.0  | 1269.8149466192200 | 4.55 | NPH | 14.0 | 2 | 700 | 04NOV2020 14:15 | LY3819253 700mg IV           |
| 10011014 | 11823141900 | 73_41900_322847w_BG1.fastq.gz         | V320L | 2.542  | 1259.0  | 1269.8149466192200 | 4.55 | NPH | 14.0 | 2 | 700 | 04NOV2020 14:15 | LY3819253 700mg IV           |
| 10011014 | 11823141900 | 73_41900_322847w_BG1.fastq.gz         | Q321_ | 1.83   | 1257.0  | 1269.8149466192200 | 4.55 | NPH | 14.0 | 2 | 700 | 04NOV2020 14:15 | LY3819253 700mg IV           |
| 10011014 | 11823141900 | 73_41900_322847w_BG1.fastq.gz         | P384L | 1.687  | 1245.0  | 1269.8149466192200 | 4.55 | NPH | 14.0 | 2 | 700 | 04NOV2020 14:15 | LY3819253 700mg IV           |
| 10011014 | 11823141900 | 73_41900_322847w_BG1.fastq.gz         | R457M | 1.373  | 1311.0  | 1269.8149466192200 | 4.55 | NPH | 14.0 | 2 | 700 | 04NOV2020 14:15 | LY3819253 700mg IV           |
| 10011014 | 11823141900 | 73_41900_322847w_BG1.fastq.gz         | F497S | 1.02   | 1275.0  | 1269.8149466192200 | 4.55 | NPH | 14.0 | 2 | 700 | 04NOV2020 14:15 | LY3819253 700mg IV           |
| 10011014 | 11823141900 | 73_41900_322847w_BG1.fastq.gz         | L513F | 1.457  | 1235.0  | 1269.8149466192200 | 4.55 | NPH | 14.0 | 2 | 700 | 04NOV2020 14:15 | LY3819253 700mg IV           |
| 10011014 | 11823       |                                       |       |        |         |                    |      |     |      |   |     |                 |                              |

|          |             |                                       |       |        |        |                    |      |     |      |   |     |                 |                              |
|----------|-------------|---------------------------------------|-------|--------|--------|--------------------|------|-----|------|---|-----|-----------------|------------------------------|
| 10051009 | 11841962696 | G5_11841962696_324019w_CG5.fastq.gz   | K786R | 3.101  | 774.0  | 2032.0737100737100 | 6.62 | NPH | 14.0 | 2 | 700 | 30NOV2020 13:05 | LY3819253 700mg IV           |
| 10331001 | 11839924226 | 14_11839924226_323283w_CE12.fastq.gz  | S12F  | 6.31   | 1553.0 | 522.097205346294   | 3.44 | NPH | 14.0 | 2 | 700 | 28OCT2020 13:11 | LY3819253 700mg IV           |
| 10331001 | 11839924226 | 14_11839924226_323283w_CE12.fastq.gz  | T95I  | 5.509  | 599.0  | 522.097205346294   | 3.44 | NPH | 14.0 | 2 | 700 | 28OCT2020 13:11 | LY3819253 700mg IV           |
| 10331001 | 11839924226 | 14_11839924226_323283w_CE12.fastq.gz  | W152C | 2.148  | 419.0  | 522.097205346294   | 3.44 | NPH | 14.0 | 2 | 700 | 28OCT2020 13:11 | LY3819253 700mg IV           |
| 10331001 | 11839924226 | 14_11839924226_323283w_CE12.fastq.gz  | V159G | 4.872  | 431.0  | 522.097205346294   | 3.44 | NPH | 14.0 | 2 | 700 | 28OCT2020 13:11 | LY3819253 700mg IV           |
| 10331001 | 11839924226 | 14_11839924226_323283w_CE12.fastq.gz  | T274A | 5.263  | 475.0  | 522.097205346294   | 3.44 | NPH | 14.0 | 2 | 700 | 28OCT2020 13:11 | LY3819253 700mg IV           |
| 10331001 | 11839924226 | 14_11839924226_323283w_CE12.fastq.gz  | S373L | 5.8    | 500.0  | 522.097205346294   | 3.44 | NPH | 14.0 | 2 | 700 | 28OCT2020 13:11 | LY3819253 700mg IV           |
| 10331001 | 11839924226 | 14_11839924226_323283w_CE12.fastq.gz  | P507L | 5.187  | 482.0  | 522.097205346294   | 3.44 | NPH | 14.0 | 2 | 700 | 28OCT2020 13:11 | LY3819253 700mg IV           |
| 10331001 | 11839924226 | 14_11839924226_323283w_CE12.fastq.gz  | A520V | 3.648  | 466.0  | 522.097205346294   | 3.44 | NPH | 14.0 | 2 | 700 | 28OCT2020 13:11 | LY3819253 700mg IV           |
| 10331001 | 11839924226 | 14_11839924226_323283w_CE12.fastq.gz  | S673I | 4.202  | 357.0  | 522.097205346294   | 3.44 | NPH | 14.0 | 2 | 700 | 28OCT2020 13:11 | LY3819253 700mg IV           |
| 10331001 | 11839924226 | 14_11839924226_323283w_CE12.fastq.gz  | A684V | 6.916  | 347.0  | 522.097205346294   | 3.44 | NPH | 14.0 | 2 | 700 | 28OCT2020 13:11 | LY3819253 700mg IV           |
| 10331001 | 11839924226 | 14_11839924226_323283w_CE12.fastq.gz  | A706V | 3.933  | 356.0  | 522.097205346294   | 3.44 | NPH | 14.0 | 2 | 700 | 28OCT2020 13:11 | LY3819253 700mg IV           |
| 10201008 | 11818966599 | B2_11818966599_323692w_NB2.fastq.gz   | A783V | 1.008  | 1885.0 | 2734.192918192920  | 4.59 | NAS | 14.0 | 2 | 700 | 05NOV2020 09:45 | LY3819253 700mg IV           |
| 10051009 | 11808474059 | D11_11808474059_323692w_ND11.fastq.gz | T547K | 14.141 | 2574.0 | 3063.952029520300  | 2.74 | NAS | 14.0 | 2 | 700 | 30NOV2020 13:05 | LY3819253 700mg IV           |
| 10251008 | 11818906119 | C9_11818906119_323692w_NC9.fastq.gz   | S494P | 15.173 | 2867.0 | 2937.923264311820  | 3.7  | NAS | 14.0 | 2 | 700 | 09NOV2020 11:05 | LY3819253 700mg IV           |
| 10131011 | 11850408452 | 80_11850408452_323231w_NG8.fastq.gz   | V47F  | 1.497  | 4875.0 | 1813.4501800720300 | 3.02 | NAS | 14.0 | 2 | 700 | 24NOV2020 11:11 | Placebo for LY3819253 700 mg |
| 10131011 | 11850408452 | 80_11850408452_323231w_NG8.fastq.gz   | F59L  | 2.089  | 4021.0 | 1813.4501800720300 | 3.02 | NAS | 14.0 | 2 | 700 | 24NOV2020 11:11 | Placebo for LY3819253 700 mg |
| 10131011 | 11850408452 | 80_11850408452_323231w_NG8.fastq.gz   | A67S  | 1.709  | 3570.0 | 1813.4501800720300 | 3.02 | NAS | 14.0 | 2 | 700 | 24NOV2020 11:11 | Placebo for LY3819253 700 mg |
| 10131011 | 11850408452 | 80_11850408452_323231w_NG8.fastq.gz   | E154G | 1.802  | 1609.0 | 1813.4501800720300 | 3.02 | NAS | 14.0 | 2 | 700 | 24NOV2020 11:11 | Placebo for LY3819253 700 mg |
| 10131011 | 11850408452 | 80_11850408452_323231w_NG8.fastq.gz   | G181E | 1.638  | 1587.0 | 1813.4501800720300 | 3.02 | NAS | 14.0 | 2 | 700 | 24NOV2020 11:11 | Placebo for LY3819253 700 mg |
| 10131011 | 11850408452 | 80_11850408452_323231w_NG8.fastq.gz   | G219V | 1.734  | 1615.0 | 1813.4501800720300 | 3.02 | NAS | 14.0 | 2 | 700 | 24NOV2020 11:11 | Placebo for LY3819253 700 mg |
| 10131011 | 11850408452 | 80_11850408452_323231w_NG8.fastq.gz   | S305P | 1.279  | 1720.0 | 1813.4501800720300 | 3.02 | NAS | 14.0 | 2 | 700 | 24NOV2020 11:11 | Placebo for LY3819253 700 mg |
| 10131011 | 11850408452 | 80_11850408452_323231w_NG8.fastq.gz   | I326V | 1.629  | 1780.0 | 1813.4501800720300 | 3.02 | NAS | 14.0 | 2 | 700 | 24NOV2020 11:11 | Placebo for LY3819253 700 mg |
| 10131011 | 11850408452 | 80_11850408452_323231w_NG8.fastq.gz   | S373L | 1.199  | 1751.0 | 1813.4501800720300 | 3.02 | NAS | 14.0 | 2 | 700 | 24NOV2020 11:11 | Placebo for LY3819253 700 mg |
| 10131011 | 11850408452 | 80_11850408452_323231w_NG8.fastq.gz   | G416E | 1.648  | 1760.0 | 1813.4501800720300 | 3.02 | NAS | 14.0 | 2 | 700 | 24NOV2020 11:11 | Placebo for LY3819253 700 mg |
| 10131011 | 11850408452 | 80_11850408452_323231w_NG8.fastq.gz   | G476A | 2.493  | 1725.0 | 1813.4501800720300 | 3.02 | NAS | 14.0 | 2 | 700 | 24NOV2020 11:11 | Placebo for LY3819253 700 mg |
| 10131011 | 11850408452 | 80_11850408452_323231w_NG8.fastq.gz   | F559L | 1.562  | 1600.0 | 1813.4501800720300 | 3.02 | NAS | 14.0 | 2 | 700 | 24NOV2020 11:11 | Placebo for LY3819253 700 mg |
| 10131011 | 11850408452 | 80_11850408452_323231w_NG8.fastq.gz   | P561S | 2.36   | 1610.0 | 1813.4501800720300 | 3.02 | NAS | 14.0 | 2 | 700 | 24NOV2020 11:11 | Placebo for LY3819253 700 mg |
| 10131011 | 11850408452 | 80_11850408452_323231w_NG8.fastq.gz   | Y741H | 2.164  | 647.0  | 1813.4501800720300 | 3.02 | NAS | 14.0 | 2 | 700 | 24NOV2020 11:11 | Placebo for LY3819253 700 mg |
| 10201010 | 11818967111 | 11_11818967111_323231w_NA11.fastq.gz  | K814N | 16.667 | 6.0    | 1622.0012195122000 | 4.51 | NPH | 14.0 | 2 | 700 | 04NOV2020 10:30 | Placebo for LY3819253 700 mg |
| 10201010 | 11818967111 | 11_11818967111_323231w_NA11.fastq.gz  | R815S | 16.667 | 6.0    | 1622.0012195122000 | 4.51 | NPH | 14.0 | 2 | 700 | 04NOV2020 10:30 | Placebo for LY3819253 700 mg |
| 10331007 | 11814691722 | 82_11814691722_323231w_NG10.fastq.gz  | L492F | 16.823 | 3834.0 | 4194.777641277640  | 2.54 | NPH | 14.0 | 2 | 700 | 23NOV2020 08:38 | LY3819253 700mg IV           |
| 10201008 | 11818965061 | 14_11818965061_323231w_NB2.fastq.gz   | S813G | 1.075  | 93.0   | 3026.071090047390  | 6.22 | NPH | 14.0 | 2 | 700 | 05NOV2020 09:46 | LY3819253 700mg IV           |
| 10201008 | 11818965061 | 14_11818965061_323231w_NB2.fastq.gz   | S813R | 1.075  | 93.0   | 3026.071090047390  | 6.22 | NPH | 14.0 | 2 | 700 | 05NOV2020 09:46 | LY3819253 700mg IV           |
| 10201008 | 11818965061 | 14_11818965061_323231w_NB2.fastq.gz   | S816_ | 2.151  | 93.0   | 3026.071090047390  | 6.22 | NPH | 14.0 | 2 | 700 | 05NOV2020 09:46 | LY3819253 700mg IV           |
| 10011015 | 11816796164 | F10_11816796164_S1S2_323570w_NF10.fa  | V401A | 100.0  | 2.0    | 2109.2334905660400 | 2.07 | NPH | 21.0 | 2 | 700 | 18NOV2020 11:03 | LY3819253 700mg IV           |
| 10011015 | 11816796164 | F10_11816796164_S1S2_323570w_NF10.fa  | R403I | 100.0  | 2.0    | 2109.2334905660400 | 2.07 | NPH | 21.0 | 2 | 700 | 18NOV2020 11:03 | LY3819253 700mg IV           |
| 10011015 | 11816796164 | F10_11816796164_S1S2_323570w_NF10.fa  | G404E | 100.0  | 2.0    | 2109.2334905660400 | 2.07 | NPH | 21.0 | 2 | 700 | 18NOV2020 11:03 | LY3819253 700mg IV           |
| 10011015 | 11816796164 | F10_11816796164_S1S2_323570w_NF10.fa  | G484K | 99.933 | 2987.0 | 2109.2334905660400 | 2.07 | NPH | 21.0 | 2 | 700 | 18NOV2020 11:03 | LY3819253 700mg IV           |
| 10011015 | 11816796164 | F10_11816796164_S1S2_323570w_NF10.fa  | D614G | 99.86  | 1428.0 | 2109.2334905660400 | 2.07 | NPH | 21.0 | 2 | 700 | 18NOV2020 11:03 | LY3819253 700mg IV           |
| 10011015 | 11816796164 | F10_11816796164_S1S2_323570w_NF10.fa  | V620F | 99.86  | 1427.0 | 2109.2334905660400 | 2.07 | NPH | 21.0 | 2 | 700 | 18NOV2020 11:03 | LY3819253 700mg IV           |
| 10011015 | 11816796164 | F10_11816796164_S1S2_323570w_NF10.fa  | Y789_ | 100.0  | 1.0    | 2109.2334905660400 | 2.07 | NPH | 21.0 | 2 | 700 | 18NOV2020 11:03 | LY3819253 700mg IV           |
| 10011015 | 11816796164 | F10_11816796164_S1S2_323570w_NF10.fa  | R815S | 100.0  | 1.0    | 2109.2334905660400 | 2.07 | NPH | 21.0 | 2 | 700 | 18NOV2020 11:03 | LY3819253 700mg IV           |
| 10201010 | 11820978383 | A10_11820978383_324020w_NA10.fastq.gz | D614G | 100.0  | 1610.0 | 1402.3182374541000 | 2.05 | NPH | 21.0 | 2 | 700 | 10NOV2020 10:11 | Placebo for LY3819253 700 mg |
| 10121006 | 11856714183 | F5_11856714183_324020w_NF5.fastq.gz   | D614G | 99.718 | 2486.0 | 1750.5603864734300 | 2.44 | NPH | 21.0 | 2 | 700 | 22NOV2020 14:55 | LY3819253 700mg IV           |
| 10421007 | 11854554375 | C9_11854554375_324020w_NC9.fastq.gz   | D614G | 99.88  | 1660.0 | 2566.413414634150  | 2.25 | NPH | 21.0 | 2 | 700 | 02NOV2020 13:08 | Placebo for LY3819253 700 mg |
| 10131007 | 11844109441 | B1_11844109441_324020w_NB1.fastq.gz   | Y145H | 99.563 | 1145.0 | 2063.5631901840500 | 2.77 | NPH | 21.0 | 2 | 700 | 13NOV2020 11:19 | Placebo for LY3819253 700 mg |
| 10131007 | 11844109441 | B1_11844109441_324020w_NB1.fastq.gz   | S373L | 99.94  | 1665.0 | 2063.5631901840500 | 2.77 | NPH | 21.0 | 2 | 700 | 13NOV2020 11:19 | Placebo for LY3819253 700 mg |
| 10131007 | 11844109441 | B1_11844109441_324020w_NB1.fastq.gz   | D614G | 99.719 | 1422.0 | 2063.5631901840500 | 2.77 | NPH | 21.0 | 2 | 700 | 13NOV2020 11:19 | Placebo for LY3819253 700 mg |
| 10131007 | 11844109441 | B1_11844109441_324020w_NB1.fastq.gz   | P631S | 98.977 | 1368.0 | 2063.5631901840500 | 2.77 | NPH | 21.0 | 2 | 700 | 13NOV2020 11:19 | Placebo for LY3819253 700 mg |
| 10131007 | 11844109441 | B1_11844109441_324020w_NB1.fastq.gz   | T732I | 98.753 | 722.0  | 2063.5631901840500 | 2.77 | NPH | 21.0 | 2 | 700 | 13NOV2020 11:19 | Placebo for LY3819253 700 mg |
| 10131007 | 11844109441 | B1_11844109441_324020w_NB1.fastq.gz   | K814N | 100.0  | 1.0    | 2063.5631901840500 | 2.77 | NPH | 21.0 | 2 | 700 | 13NOV2020 11:19 | Placebo for LY3819253 700 mg |
| 10221007 | 11839869447 | E7_11839869447_324020w_NE7.fastq.gz   | D614G | 99.61  | 1796.0 | 2385.470588235290  | 2.7  | NPH | 21.0 | 2 | 700 | 18NOV2020 08:33 | Placebo for LY3819253 700 mg |
| 10221005 | 11839869444 | A8_11839869444_324020w_NA8.fastq.gz   | L54P  | 99.965 | 2853.0 | 1938.8142681426800 | 2.51 | NPH | 21.0 | 2 | 700 | 13NOV2020 08:28 | Placebo for LY3819253 700 mg |
| 10221005 | 11839869444 | A8_11839869444_324020w_NA8.fastq.gz   | V143F | 99.631 | 1084.0 | 1938.8142681426800 | 2.51 | NPH | 21.0 | 2 | 700 | 13NOV2020 08:28 | Placebo for LY3819253 700 mg |
| 10221005 | 11839869444 | A8_11839869444_324020w_NA8.fastq.gz   | D614G | 99.898 | 982.0  | 1938.8142681426800 | 2.51 | NPH | 21.0 | 2 | 700 | 13NOV2020 08:28 | Placebo for LY3819253 700 mg |
| 10221005 | 11839869444 | A8_11839869444_324020w_NA8.fastq.gz   | T732A | 100.0  | 482.0  | 1938.8142681426800 | 2.51 | NPH | 21.0 | 2 | 700 | 13NOV2020 08:28 | Placebo for LY3819253 700 mg |
| 10161005 | 11848331333 | D6_11848331333_324020w_ND6.fastq.gz   | D614G | 99.885 | 1733.0 | 2202.888077858880  | 3.31 | NPH | 21.0 | 2 | 700 | 20NOV2020 10:28 | Placebo for LY3819253 700 mg |
| 10051003 | 11835659596 | 18_59596_322873w_NH4.fastq.gz         | D614G | 100.0  | 423.0  | 752.0754257907540  | 2.51 | NPH | 21.0 | 2 | 700 | 10NOV2020 09:20 | LY3819253 700mg IV           |
| 10331001 | 11839925000 | 22_25000_322873w_NH8.fastq.gz         | D614G | 100.0  | 319.0  | 579.0073349633250  | 2.42 | NPH | 21.0 | 2 | 700 | 06NOV2020 13:29 | LY3819253 700mg IV           |
| 10251008 | 11818906628 | 70_11818906628_323284w_NF10.fastq.gz  | E484K | 99.737 | 1521.0 | 1792.4987775061100 | 2.18 | NPH | 21.0 | 2 | 700 | 16NOV2020 11:10 | LY3819253 700mg IV           |
| 10251008 | 11818906628 | 70_11818906628_323284w_NF10.fastq.gz  | D614G | 100.0  | 1274.0 | 1792.4987775061100 | 2.18 | NPH | 21.0 | 2 | 700 | 16NOV2020 11:10 | LY3819253 700mg IV           |
| 10421009 | 11852449736 | 100_11852449736_323348w_NC4.fastq.gz  | P463L | 40.0   | 1930.0 | 1773.0291262135900 | 1.0  | NPH | 21.0 | 2 | 700 | 12NOV2020 13:15 | Placebo for LY3819253 700 mg |
| 10421009 | 11852449736 | 100_11852449736_323348w_NC4.fastq.gz  | D614G | 100.0  | 1069.0 |                    |      |     |      |   |     |                 |                              |

|          |             |                                       |         |        |        |                    |      |     |      |   |     |                 |                              |
|----------|-------------|---------------------------------------|---------|--------|--------|--------------------|------|-----|------|---|-----|-----------------|------------------------------|
| 10131006 | 11835675721 | 55_11835675721_323348w_NB3.fastq.gz   | T638K   | 24.587 | 3030.0 | 4999.836538461540  | 2.45 | NPH | 21.0 | 2 | 700 | 09NOV2020 10:38 | Placebo for LY3819253 700 mg |
| 10131006 | 11835675721 | 55_11835675721_323348w_NB3.fastq.gz   | T732A   | 24.194 | 3972.0 | 4999.836538461540  | 2.45 | NPH | 21.0 | 2 | 700 | 09NOV2020 10:38 | Placebo for LY3819253 700 mg |
| 10131006 | 11835675721 | 55_11835675721_323348w_NB3.fastq.gz   | Q762R   | 39.634 | 1910.0 | 4999.836538461540  | 2.45 | NPH | 21.0 | 2 | 700 | 09NOV2020 10:38 | Placebo for LY3819253 700 mg |
| 10131006 | 11835675721 | 55_11835675721_323348w_NB3.fastq.gz   | K795N   | 40.9   | 7841.0 | 4999.836538461540  | 2.45 | NPH | 21.0 | 2 | 700 | 09NOV2020 10:38 | Placebo for LY3819253 700 mg |
| 10011017 | 11820980227 | 86R_11820980227_Repeat_323348w_NH8.f  | D614G   | 99.908 | 1084.0 | 1900.7481662591700 | 2.15 | NPH | 21.0 | 2 | 700 | 24NOV2020 10:31 | LY3819253 700mg IV           |
| 10261032 | 11848330316 | 23_11848330316_323232w_AB11.fastq.gz  | D614G   | 99.896 | 961.0  | 1246.138517618470  | 2.76 | NPH | 21.0 | 2 | 700 | 19NOV2020 09:42 | Placebo for LY3819253 700 mg |
| 10491006 | 11852449481 | 49_11852449481_323232w_AE1.fastq.gz   | C15S    | 22.497 | 4294.0 | 1003.7308160779500 | 3.22 | NPH | 21.0 | 2 | 700 | 01DEC2020 09:31 | LY3819253 700mg IV           |
| 10491006 | 11852449481 | 49_11852449481_323232w_AE1.fastq.gz   | A27S    | 82.707 | 3805.0 | 1003.7308160779500 | 3.22 | NPH | 21.0 | 2 | 700 | 01DEC2020 09:31 | LY3819253 700mg IV           |
| 10491006 | 11852449481 | 49_11852449481_323232w_AE1.fastq.gz   | H146N   | 24.185 | 736.0  | 1003.7308160779500 | 3.22 | NPH | 21.0 | 2 | 700 | 01DEC2020 09:31 | LY3819253 700mg IV           |
| 10491006 | 11852449481 | 49_11852449481_323232w_AE1.fastq.gz   | S247N   | 84.501 | 942.0  | 1003.7308160779500 | 3.22 | NPH | 21.0 | 2 | 700 | 01DEC2020 09:31 | LY3819253 700mg IV           |
| 10491006 | 11852449481 | 49_11852449481_323232w_AE1.fastq.gz   | D614G   | 100.0  | 767.0  | 1003.7308160779500 | 3.22 | NPH | 21.0 | 2 | 700 | 01DEC2020 09:31 | LY3819253 700mg IV           |
| 10491006 | 11852449481 | 49_11852449481_323232w_AE1.fastq.gz   | G669V   | 20.826 | 533.0  | 1003.7308160779500 | 3.22 | NPH | 21.0 | 2 | 700 | 01DEC2020 09:31 | LY3819253 700mg IV           |
| 10491006 | 11852449481 | 49_11852449481_323232w_AE1.fastq.gz   | G769E   | 20.233 | 257.0  | 1003.7308160779500 | 3.22 | NPH | 21.0 | 2 | 700 | 01DEC2020 09:31 | LY3819253 700mg IV           |
| 10011015 | 11816793613 | 76_11816793613_323232w_AG4.fastq.gz   | D138del | 100.0  | 309.0  | 656.5918618988900  | 2.25 | NAS | 21.0 | 2 | 700 | 18NOV2020 11:01 | LY3819253 700mg IV           |
| 10011015 | 11816793613 | 76_11816793613_323232w_AG4.fastq.gz   | P139del | 100.0  | 309.0  | 656.5918618988900  | 2.25 | NAS | 21.0 | 2 | 700 | 18NOV2020 11:01 | LY3819253 700mg IV           |
| 10011015 | 11816793613 | 76_11816793613_323232w_AG4.fastq.gz   | F140del | 100.0  | 309.0  | 656.5918618988900  | 2.25 | NAS | 21.0 | 2 | 700 | 18NOV2020 11:01 | LY3819253 700mg IV           |
| 10011015 | 11816793613 | 76_11816793613_323232w_AG4.fastq.gz   | L141del | 100.0  | 309.0  | 656.5918618988900  | 2.25 | NAS | 21.0 | 2 | 700 | 18NOV2020 11:01 | LY3819253 700mg IV           |
| 10011015 | 11816793613 | 76_11816793613_323232w_AG4.fastq.gz   | G142del | 100.0  | 309.0  | 656.5918618988900  | 2.25 | NAS | 21.0 | 2 | 700 | 18NOV2020 11:01 | LY3819253 700mg IV           |
| 10011015 | 11816793613 | 76_11816793613_323232w_AG4.fastq.gz   | V143del | 100.0  | 309.0  | 656.5918618988900  | 2.25 | NAS | 21.0 | 2 | 700 | 18NOV2020 11:01 | LY3819253 700mg IV           |
| 10011015 | 11816793613 | 76_11816793613_323232w_AG4.fastq.gz   | E484K   | 99.69  | 645.0  | 656.5918618988900  | 2.25 | NAS | 21.0 | 2 | 700 | 18NOV2020 11:01 | LY3819253 700mg IV           |
| 10011015 | 11816793613 | 76_11816793613_323232w_AG4.fastq.gz   | D614G   | 100.0  | 460.0  | 656.5918618988900  | 2.25 | NAS | 21.0 | 2 | 700 | 18NOV2020 11:01 | LY3819253 700mg IV           |
| 10201007 | 11818967108 | 65_67108_322847w_BF5.fastq.gz         | P82L    | 21.117 | 2060.0 | 1659.110303030300  | 3.62 | NPH | 21.0 | 2 | 700 | 05NOV2020 07:34 | LY3819253 700mg IV           |
| 10201007 | 11818967108 | 65_67108_322847w_BF5.fastq.gz         | A93V    | 21.727 | 1726.0 | 1659.110303030300  | 3.62 | NPH | 21.0 | 2 | 700 | 05NOV2020 07:34 | LY3819253 700mg IV           |
| 10201007 | 11818967108 | 65_67108_322847w_BF5.fastq.gz         | D614G   | 99.694 | 1309.0 | 1659.110303030300  | 3.62 | NPH | 21.0 | 2 | 700 | 05NOV2020 07:34 | LY3819253 700mg IV           |
| 10201007 | 11818967108 | 65_67108_322847w_BF5.fastq.gz         | A626S   | 20.7   | 1285.0 | 1659.110303030300  | 3.62 | NPH | 21.0 | 2 | 700 | 05NOV2020 07:34 | LY3819253 700mg IV           |
| 10201007 | 11818967108 | 65_67108_322847w_BF5.fastq.gz         | P681R   | 99.807 | 1034.0 | 1659.110303030300  | 3.62 | NPH | 21.0 | 2 | 700 | 05NOV2020 07:34 | LY3819253 700mg IV           |
| 10011015 | 11816796164 | F10_11816796164_S1S2_323570w_NF10.fa  | K814M   | 14.286 | 7.0    | 2109.2334905660400 | 2.07 | NPH | 21.0 | 2 | 700 | 18NOV2020 11:03 | LY3819253 700mg IV           |
| 10011015 | 11816796164 | F10_11816796164_S1S2_323570w_NF10.fa  | K814N   | 14.286 | 7.0    | 2109.2334905660400 | 2.07 | NPH | 21.0 | 2 | 700 | 18NOV2020 11:03 | LY3819253 700mg IV           |
| 10201010 | 11820978383 | A10_11820978383_324020w_NA10.fastq.gz | K300E   | 1.058  | 189.0  | 1402.3182374541000 | 2.05 | NPH | 21.0 | 2 | 700 | 10NOV2020 10:11 | Placebo for LY3819253 700 mg |
| 10201010 | 11820978383 | A10_11820978383_324020w_NA10.fastq.gz | Y313H   | 1.299  | 231.0  | 1402.3182374541000 | 2.05 | NPH | 21.0 | 2 | 700 | 10NOV2020 10:11 | Placebo for LY3819253 700 mg |
| 10201010 | 11820978383 | A10_11820978383_324020w_NA10.fastq.gz | L546F   | 1.143  | 1924.0 | 1402.3182374541000 | 2.05 | NPH | 21.0 | 2 | 700 | 10NOV2020 10:11 | Placebo for LY3819253 700 mg |
| 10121006 | 11856714183 | F5_11856714183_324020w_NF5.fastq.gz   | R21S    | 3.571  | 28.0   | 1750.5603864734300 | 2.44 | NPH | 21.0 | 2 | 700 | 22NOV2020 14:55 | LY3819253 700mg IV           |
| 10121006 | 11856714183 | F5_11856714183_324020w_NF5.fastq.gz   | A27P    | 3.571  | 28.0   | 1750.5603864734300 | 2.44 | NPH | 21.0 | 2 | 700 | 22NOV2020 14:55 | LY3819253 700mg IV           |
| 10121006 | 11856714183 | F5_11856714183_324020w_NF5.fastq.gz   | Y38_    | 3.571  | 28.0   | 1750.5603864734300 | 2.44 | NPH | 21.0 | 2 | 700 | 22NOV2020 14:55 | LY3819253 700mg IV           |
| 10121006 | 11856714183 | F5_11856714183_324020w_NF5.fastq.gz   | S45P    | 3.846  | 26.0   | 1750.5603864734300 | 2.44 | NPH | 21.0 | 2 | 700 | 22NOV2020 14:55 | LY3819253 700mg IV           |
| 10121006 | 11856714183 | F5_11856714183_324020w_NF5.fastq.gz   | E180A   | 20.0   | 5.0    | 1750.5603864734300 | 2.44 | NPH | 21.0 | 2 | 700 | 22NOV2020 14:55 | LY3819253 700mg IV           |
| 10121006 | 11856714183 | F5_11856714183_324020w_NF5.fastq.gz   | N334H   | 16.667 | 6.0    | 1750.5603864734300 | 2.44 | NPH | 21.0 | 2 | 700 | 22NOV2020 14:55 | LY3819253 700mg IV           |
| 10121006 | 11856714183 | F5_11856714183_324020w_NF5.fastq.gz   | V401A   | 19.048 | 21.0   | 1750.5603864734300 | 2.44 | NPH | 21.0 | 2 | 700 | 22NOV2020 14:55 | LY3819253 700mg IV           |
| 10121006 | 11856714183 | F5_11856714183_324020w_NF5.fastq.gz   | I402del | 4.762  | 21.0   | 1750.5603864734300 | 2.44 | NPH | 21.0 | 2 | 700 | 22NOV2020 14:55 | LY3819253 700mg IV           |
| 10121006 | 11856714183 | F5_11856714183_324020w_NF5.fastq.gz   | R403I   | 15.0   | 20.0   | 1750.5603864734300 | 2.44 | NPH | 21.0 | 2 | 700 | 22NOV2020 14:55 | LY3819253 700mg IV           |
| 10121006 | 11856714183 | F5_11856714183_324020w_NF5.fastq.gz   | G404E   | 15.0   | 20.0   | 1750.5603864734300 | 2.44 | NPH | 21.0 | 2 | 700 | 22NOV2020 14:55 | LY3819253 700mg IV           |
| 10121006 | 11856714183 | F5_11856714183_324020w_NF5.fastq.gz   | D405E   | 9.091  | 22.0   | 1750.5603864734300 | 2.44 | NPH | 21.0 | 2 | 700 | 22NOV2020 14:55 | LY3819253 700mg IV           |
| 10121006 | 11856714183 | F5_11856714183_324020w_NF5.fastq.gz   | D405N   | 4.545  | 22.0   | 1750.5603864734300 | 2.44 | NPH | 21.0 | 2 | 700 | 22NOV2020 14:55 | LY3819253 700mg IV           |
| 10121006 | 11856714183 | F5_11856714183_324020w_NF5.fastq.gz   | D405Y   | 4.545  | 22.0   | 1750.5603864734300 | 2.44 | NPH | 21.0 | 2 | 700 | 22NOV2020 14:55 | LY3819253 700mg IV           |
| 10121006 | 11856714183 | F5_11856714183_324020w_NF5.fastq.gz   | P665L   | 15.029 | 2056.0 | 1750.5603864734300 | 2.44 | NPH | 21.0 | 2 | 700 | 22NOV2020 14:55 | LY3819253 700mg IV           |
| 10121006 | 11856714183 | F5_11856714183_324020w_NF5.fastq.gz   | K786R   | 1.448  | 1312.0 | 1750.5603864734300 | 2.44 | NPH | 21.0 | 2 | 700 | 22NOV2020 14:55 | LY3819253 700mg IV           |
| 10421007 | 11854554375 | C9_11854554375_324020w_NC9.fastq.gz   | K786R   | 1.213  | 742.0  | 2566.413414634150  | 2.25 | NPH | 21.0 | 2 | 700 | 02NOV2020 13:08 | Placebo for LY3819253 700 mg |
| 10221007 | 11839869447 | E7_11839869447_324020w_NE7.fastq.gz   | F135S   | 2.634  | 1063.0 | 2385.470588235290  | 2.7  | NPH | 21.0 | 2 | 700 | 18NOV2020 08:33 | Placebo for LY3819253 700 mg |
| 10221007 | 11839869447 | E7_11839869447_324020w_NE7.fastq.gz   | Q218_   | 2.493  | 1083.0 | 2385.470588235290  | 2.7  | NPH | 21.0 | 2 | 700 | 18NOV2020 08:33 | Placebo for LY3819253 700 mg |
| 10221007 | 11839869447 | E7_11839869447_324020w_NE7.fastq.gz   | L452R   | 4.983  | 2609.0 | 2385.470588235290  | 2.7  | NPH | 21.0 | 2 | 700 | 18NOV2020 08:33 | Placebo for LY3819253 700 mg |
| 10161005 | 11848331333 | D6_11848331333_324020w_ND6.fastq.gz   | E298D   | 7.185  | 1183.0 | 2202.888077858880  | 3.31 | NPH | 21.0 | 2 | 700 | 20NOV2020 10:28 | Placebo for LY3819253 700 mg |
| 10161005 | 11848331333 | D6_11848331333_324020w_ND6.fastq.gz   | P330L   | 7.876  | 1714.0 | 2202.888077858880  | 3.31 | NPH | 21.0 | 2 | 700 | 20NOV2020 10:28 | Placebo for LY3819253 700 mg |
| 10161005 | 11848331333 | D6_11848331333_324020w_ND6.fastq.gz   | V483I   | 8.175  | 4697.0 | 2202.888077858880  | 3.31 | NPH | 21.0 | 2 | 700 | 20NOV2020 10:28 | Placebo for LY3819253 700 mg |
| 10161005 | 11848331333 | D6_11848331333_324020w_ND6.fastq.gz   | A623del | 2.647  | 1511.0 | 2202.888077858880  | 3.31 | NPH | 21.0 | 2 | 700 | 20NOV2020 10:28 | Placebo for LY3819253 700 mg |
| 10161005 | 11848331333 | D6_11848331333_324020w_ND6.fastq.gz   | R685C   | 2.548  | 1295.0 | 2202.888077858880  | 3.31 | NPH | 21.0 | 2 | 700 | 20NOV2020 10:28 | Placebo for LY3819253 700 mg |
| 10161005 | 11848331333 | D6_11848331333_324020w_ND6.fastq.gz   | S704L   | 7.717  | 1257.0 | 2202.888077858880  | 3.31 | NPH | 21.0 | 2 | 700 | 20NOV2020 10:28 | Placebo for LY3819253 700 mg |
| 10161005 | 11848331333 | D6_11848331333_324020w_ND6.fastq.gz   | T719I   | 8.541  | 1042.0 | 2202.888077858880  | 3.31 | NPH | 21.0 | 2 | 700 | 20NOV2020 10:28 | Placebo for LY3819253 700 mg |
| 10161005 | 11848331333 | D6_11848331333_324020w_ND6.fastq.gz   | K786R   | 1.449  | 828.0  | 2202.888077858880  | 3.31 | NPH | 21.0 | 2 | 700 | 20NOV2020 10:28 | Placebo for LY3819253 700 mg |
| 10051003 | 11835659596 | 18_59596_322873w_NH4.fastq.gz         | S494L   | 7.882  | 1218.0 | 752.0754257907540  | 2.51 | NPH | 21.0 | 2 | 700 | 10NOV2020 09:20 | LY3819253 700mg IV           |
| 10051003 | 11835659596 | 18_59596_322873w_NH4.fastq.gz         | Q675_   | 9.777  | 358.0  | 752.0754257907540  | 2.51 | NPH | 21.0 | 2 | 700 | 10NOV2020 09:20 | LY3819253 700mg IV           |
| 10051003 | 11835659596 | 18_59596_322873w_NH4.fastq.gz         | K786R   | 1.558  | 321.0  | 752.0754257907540  | 2.51 | NPH | 21.0 | 2 | 700 | 10NOV2020 09:20 | LY3819253 700mg IV           |
| 10331001 | 11839925000 | 22_25000_322873w_NH8.fastq.gz         | K786R   | 1.053  | 190.0  | 579.0073349633250  | 2.42 | NPH | 21.0 | 2 | 700 | 06NOV2020 13:29 | LY3819253 700mg IV           |
| 10421009 | 11852449736 | 100_11852449736_323348w_NC4.fastq.gz  | T430P   | 1.607  | 6409.0 | 1773.0291262135900 | 1.0  | NPH | 21.0 | 2 | 700 | 12NOV2020 13:15 | Placebo for LY3819253 700 mg |
| 10421009 | 11852449736 | 100_11852449736_323348w_NC4.fastq.gz  | S514F   | 1.738  | 1726.0 | 1773.0291262135900 | 1.0  | NPH | 21.0 | 2 | 700 | 12NOV2020 13:15 | Placebo for LY3819253 700 mg |
| 10171    |             |                                       |         |        |        |                    |      |     |      |   |     |                 |                              |

|          |             |                                       |         |        |         |                    |      |     |      |   |     |                 |                              |
|----------|-------------|---------------------------------------|---------|--------|---------|--------------------|------|-----|------|---|-----|-----------------|------------------------------|
| 10201019 | 11810575951 | 147_11810575951_323348w_NE5.fastq.gz  | T588K   | 3.518  | 3354.0  | 3973.761336515510  | 3.17 | NPH | 21.0 | 2 | 700 | 01DEC2020 09:10 | LY3819253 700mg IV           |
| 10201019 | 11810575951 | 147_11810575951_323348w_NE5.fastq.gz  | L611S   | 2.692  | 2786.0  | 3973.761336515510  | 3.17 | NPH | 21.0 | 2 | 700 | 01DEC2020 09:10 | LY3819253 700mg IV           |
| 10201019 | 11810575951 | 147_11810575951_323348w_NE5.fastq.gz  | F718I   | 3.744  | 1736.0  | 3973.761336515510  | 3.17 | NPH | 21.0 | 2 | 700 | 01DEC2020 09:10 | LY3819253 700mg IV           |
| 10201019 | 11810575951 | 147_11810575951_323348w_NE5.fastq.gz  | Y789D   | 1.318  | 1973.0  | 3973.761336515510  | 3.17 | NPH | 21.0 | 2 | 700 | 01DEC2020 09:10 | LY3819253 700mg IV           |
| 10061005 | 11804259916 | 88_11804259916_323348w_NB11.fastq.gz  | T430P   | 1.7    | 2353.0  | 951.2173913043480  | 2.73 | NPH | 21.0 | 2 | 700 | 18NOV2020 11:26 | LY3819253 700mg IV           |
| 10061005 | 11804259916 | 88_11804259916_323348w_NB11.fastq.gz  | S494L   | 10.908 | 1146.0  | 951.2173913043480  | 2.73 | NPH | 21.0 | 2 | 700 | 18NOV2020 11:26 | LY3819253 700mg IV           |
| 10061005 | 11804259916 | 88_11804259916_323348w_NB11.fastq.gz  | A623V   | 19.623 | 530.0   | 951.2173913043480  | 2.73 | NPH | 21.0 | 2 | 700 | 18NOV2020 11:26 | LY3819253 700mg IV           |
| 10061005 | 11804259916 | 88_11804259916_323348w_NB11.fastq.gz  | Y789D   | 1.407  | 1279.0  | 951.2173913043480  | 2.73 | NPH | 21.0 | 2 | 700 | 18NOV2020 11:26 | LY3819253 700mg IV           |
| 11061003 | 11841962432 | 135_11841962432_323348w_ND10.fastq.gz | Y789D   | 1.087  | 3311.0  | 2381.757281553400  | 2.35 | NPH | 21.0 | 2 | 700 | 25NOV2020 09:10 | Placebo for LY3819253 700 mg |
| 10131006 | 11835675721 | 55_11835675721_323348w_NB3.fastq.gz   | T430P   | 1.4    | 10000.0 | 4999.836538461540  | 2.45 | NPH | 21.0 | 2 | 700 | 09NOV2020 10:38 | Placebo for LY3819253 700 mg |
| 10131006 | 11835675721 | 55_11835675721_323348w_NB3.fastq.gz   | Y789D   | 1.265  | 7983.0  | 4999.836538461540  | 2.45 | NPH | 21.0 | 2 | 700 | 09NOV2020 10:38 | Placebo for LY3819253 700 mg |
| 10011017 | 11820980227 | 86R_11820980227_Repeat_323348w_NH8.f  | T430P   | 1.671  | 6165.0  | 1900.7481662591700 | 2.15 | NPH | 21.0 | 2 | 700 | 24NOV2020 10:31 | LY3819253 700mg IV           |
| 10011017 | 11820980227 | 86R_11820980227_Repeat_323348w_NH8.f  | Y707H   | 3.934  | 788.0   | 1900.7481662591700 | 2.15 | NPH | 21.0 | 2 | 700 | 24NOV2020 10:31 | LY3819253 700mg IV           |
| 10261032 | 11848330316 | 23_11848330316_323232w_AB11.fastq.gz  | Q14del  | 2.79   | 3727.0  | 1246.138517618470  | 2.76 | NPH | 21.0 | 2 | 700 | 19NOV2020 09:42 | Placebo for LY3819253 700 mg |
| 10261032 | 11848330316 | 23_11848330316_323232w_AB11.fastq.gz  | C15del  | 2.842  | 3659.0  | 1246.138517618470  | 2.76 | NPH | 21.0 | 2 | 700 | 19NOV2020 09:42 | Placebo for LY3819253 700 mg |
| 10261032 | 11848330316 | 23_11848330316_323232w_AB11.fastq.gz  | V16del  | 2.844  | 3657.0  | 1246.138517618470  | 2.76 | NPH | 21.0 | 2 | 700 | 19NOV2020 09:42 | Placebo for LY3819253 700 mg |
| 10261032 | 11848330316 | 23_11848330316_323232w_AB11.fastq.gz  | F140del | 4.388  | 980.0   | 1246.138517618470  | 2.76 | NPH | 21.0 | 2 | 700 | 19NOV2020 09:42 | Placebo for LY3819253 700 mg |
| 10261032 | 11848330316 | 23_11848330316_323232w_AB11.fastq.gz  | L141del | 4.513  | 975.0   | 1246.138517618470  | 2.76 | NPH | 21.0 | 2 | 700 | 19NOV2020 09:42 | Placebo for LY3819253 700 mg |
| 10261032 | 11848330316 | 23_11848330316_323232w_AB11.fastq.gz  | G142del | 4.589  | 937.0   | 1246.138517618470  | 2.76 | NPH | 21.0 | 2 | 700 | 19NOV2020 09:42 | Placebo for LY3819253 700 mg |
| 10261032 | 11848330316 | 23_11848330316_323232w_AB11.fastq.gz  | V143del | 4.943  | 870.0   | 1246.138517618470  | 2.76 | NPH | 21.0 | 2 | 700 | 19NOV2020 09:42 | Placebo for LY3819253 700 mg |
| 10261032 | 11848330316 | 23_11848330316_323232w_AB11.fastq.gz  | W258L   | 18.993 | 1132.0  | 1246.138517618470  | 2.76 | NPH | 21.0 | 2 | 700 | 19NOV2020 09:42 | Placebo for LY3819253 700 mg |
| 10261032 | 11848330316 | 23_11848330316_323232w_AB11.fastq.gz  | F490S   | 12.182 | 1141.0  | 1246.138517618470  | 2.76 | NPH | 21.0 | 2 | 700 | 19NOV2020 09:42 | Placebo for LY3819253 700 mg |
| 10261032 | 11848330316 | 23_11848330316_323232w_AB11.fastq.gz  | F643I   | 10.446 | 919.0   | 1246.138517618470  | 2.76 | NPH | 21.0 | 2 | 700 | 19NOV2020 09:42 | Placebo for LY3819253 700 mg |
| 10261032 | 11848330316 | 23_11848330316_323232w_AB11.fastq.gz  | L752P   | 10.208 | 480.0   | 1246.138517618470  | 2.76 | NPH | 21.0 | 2 | 700 | 19NOV2020 09:42 | Placebo for LY3819253 700 mg |
| 10491006 | 11852449481 | 49_11852449481_323232w_AE1.fastq.gz   | F32L    | 17.318 | 3482.0  | 1003.7308160779500 | 3.22 | NPH | 21.0 | 2 | 700 | 01DEC2020 09:31 | LY3819253 700mg IV           |
| 10491006 | 11852449481 | 49_11852449481_323232w_AE1.fastq.gz   | P251S   | 14.671 | 927.0   | 1003.7308160779500 | 3.22 | NPH | 21.0 | 2 | 700 | 01DEC2020 09:31 | LY3819253 700mg IV           |
| 10491006 | 11852449481 | 49_11852449481_323232w_AE1.fastq.gz   | Q779K   | 19.807 | 207.0   | 1003.7308160779500 | 3.22 | NPH | 21.0 | 2 | 700 | 01DEC2020 09:31 | LY3819253 700mg IV           |
| 10011015 | 11816793613 | 76_11816793613_323232w_AG4.fastq.gz   | N74D    | 1.98   | 1111.0  | 656.5918618988900  | 2.25 | NAS | 21.0 | 2 | 700 | 18NOV2020 11:01 | LY3819253 700mg IV           |
| 10201007 | 11818967108 | 65_67108_322847w_BF5.fastq.gz         | H49Y    | 16.883 | 4087.0  | 1659.110303030300  | 3.62 | NPH | 21.0 | 2 | 700 | 05NOV2020 07:34 | LY3819253 700mg IV           |
| 10201007 | 11818967108 | 65_67108_322847w_BF5.fastq.gz         | L441F   | 19.153 | 1582.0  | 1659.110303030300  | 3.62 | NPH | 21.0 | 2 | 700 | 05NOV2020 07:34 | LY3819253 700mg IV           |
| 10201007 | 11818887872 | A12_11818887872_324020w_NA12.fastq.gz | V90F    | 98.914 | 1750.0  | 2684.6898656898700 | 2.06 | NPH | 28.0 | 2 | 700 | 12NOV2020 07:33 | LY3819253 700mg IV           |
| 10201007 | 11818887872 | A12_11818887872_324020w_NA12.fastq.gz | D614G   | 99.814 | 1609.0  | 2684.6898656898700 | 2.06 | NPH | 28.0 | 2 | 700 | 12NOV2020 07:33 | LY3819253 700mg IV           |
| 10201007 | 11818887872 | A12_11818887872_324020w_NA12.fastq.gz | P681R   | 99.861 | 1436.0  | 2684.6898656898700 | 2.06 | NPH | 28.0 | 2 | 700 | 12NOV2020 07:33 | LY3819253 700mg IV           |
| 10201007 | 11818887872 | A12_11818887872_324020w_NA12.fastq.gz | S735L   | 32.776 | 1736.0  | 2684.6898656898700 | 2.06 | NPH | 28.0 | 2 | 700 | 12NOV2020 07:33 | LY3819253 700mg IV           |
| 10201007 | 11818887872 | A12_11818887872_324020w_NA12.fastq.gz | S746L   | 33.742 | 1550.0  | 2684.6898656898700 | 2.06 | NPH | 28.0 | 2 | 700 | 12NOV2020 07:33 | LY3819253 700mg IV           |
| 10201007 | 11818887872 | A12_11818887872_324020w_NA12.fastq.gz | P807S   | 27.94  | 2534.0  | 2684.6898656898700 | 2.06 | NPH | 28.0 | 2 | 700 | 12NOV2020 07:33 | LY3819253 700mg IV           |
| 10421015 | 11846160462 | 136_11846160462_323348w_ND11.fastq.gz | D614G   | 99.941 | 1688.0  | 3100.526699029130  | 2.7  | NPH | 28.0 | 2 | 700 | 01DEC2020 09:19 | Placebo for LY3819253 700 mg |
| 10421015 | 11846160462 | 136_11846160462_323348w_ND11.fastq.gz | S673I   | 48.062 | 1987.0  | 3100.526699029130  | 2.7  | NPH | 28.0 | 2 | 700 | 01DEC2020 09:19 | Placebo for LY3819253 700 mg |
| 10421015 | 11846160462 | 136_11846160462_323348w_ND11.fastq.gz | A771V   | 51.326 | 3696.0  | 3100.526699029130  | 2.7  | NPH | 28.0 | 2 | 700 | 01DEC2020 09:19 | Placebo for LY3819253 700 mg |
| 10121007 | 11856689870 | 84_11856689870_323348w_NB9.fastq.gz   | D614G   | 99.835 | 605.0   | 979.7560975609760  | 2.37 | NPH | 28.0 | 2 | 700 | 30NOV2020 11:38 | Placebo for LY3819253 700 mg |
| 10121007 | 11856689870 | 84_11856689870_323348w_NB9.fastq.gz   | T732A   | 100.0  | 289.0   | 979.7560975609760  | 2.37 | NPH | 28.0 | 2 | 700 | 30NOV2020 11:38 | Placebo for LY3819253 700 mg |
| 10421007 | 11852446085 | 109_11852446085_323348w_NC10.fastq.gz | D614G   | 99.776 | 446.0   | 785.7470167064440  | 2.48 | NPH | 28.0 | 2 | 700 | 09NOV2020 13:21 | Placebo for LY3819253 700 mg |
| 10061009 | 11820993422 | 160_11820993422_323348w_NE10.fastq.gz | D614G   | 99.9   | 1000.0  | 1803.7101449275400 | 3.14 | NPH | 28.0 | 2 | 700 | 09DEC2020 09:14 | Placebo for LY3819253 700 mg |
| 10031018 | 11848303814 | 159_11848303814_323348w_NE9.fastq.gz  | D614G   | 99.654 | 867.0   | 1635.7756097561000 | 2.16 | NPH | 28.0 | 2 | 700 | 24NOV2020 11:28 | Placebo for LY3819253 700 mg |
| 10311014 | 11839927437 | C2_11839927437_324017w_AH2.fastq.gz   | D614G   | 99.93  | 1434.0  | 2704.591187270500  | 2.64 | NPH | 28.0 | 2 | 700 | 18DEC2020 08:43 | Placebo for LY3819253 700 mg |
| 10311014 | 11839927437 | C2_11839927437_324017w_AH2.fastq.gz   | C662S   | 24.531 | 1227.0  | 2704.591187270500  | 2.64 | NPH | 28.0 | 2 | 700 | 18DEC2020 08:43 | Placebo for LY3819253 700 mg |
| 10421011 | 11821000199 | F12_11821000199_323524w_BF12.fastq.gz | D614G   | 100.0  | 838.0   | 1099.69804400978   | 5.58 | NPH | 28.0 | 2 | 700 | 29OCT2020 10:16 | Placebo for LY3819253 700 mg |
| 10011014 | 11816795208 | 45_95208_322847w_BD9.fastq.gz         | D614G   | 99.628 | 1611.0  | 2066.326113116730  | 4.04 | NPH | 28.0 | 2 | 700 | 18NOV2020 16:11 | LY3819253 700mg IV           |
| 10201007 | 11818887872 | A12_11818887872_324020w_NA12.fastq.gz | V42I    | 2.135  | 4215.0  | 2684.6898656898700 | 2.06 | NPH | 28.0 | 2 | 700 | 12NOV2020 07:33 | LY3819253 700mg IV           |
| 10201007 | 11818887872 | A12_11818887872_324020w_NA12.fastq.gz | F43I    | 2.231  | 4169.0  | 2684.6898656898700 | 2.06 | NPH | 28.0 | 2 | 700 | 12NOV2020 07:33 | LY3819253 700mg IV           |
| 10421015 | 11846160462 | 136_11846160462_323348w_ND11.fastq.gz | T430P   | 1.19   | 8068.0  | 3100.526699029130  | 2.7  | NPH | 28.0 | 2 | 700 | 01DEC2020 09:19 | Placebo for LY3819253 700 mg |
| 10421015 | 11846160462 | 136_11846160462_323348w_ND11.fastq.gz | Y789D   | 1.357  | 3758.0  | 3100.526699029130  | 2.7  | NPH | 28.0 | 2 | 700 | 01DEC2020 09:19 | Placebo for LY3819253 700 mg |
| 10121007 | 11856689870 | 84_11856689870_323348w_NB9.fastq.gz   | T430P   | 1.912  | 3348.0  | 979.7560975609760  | 2.37 | NPH | 28.0 | 2 | 700 | 30NOV2020 11:38 | Placebo for LY3819253 700 mg |
| 10121007 | 11856689870 | 84_11856689870_323348w_NB9.fastq.gz   | L754W   | 1.015  | 197.0   | 979.7560975609760  | 2.37 | NPH | 28.0 | 2 | 700 | 30NOV2020 11:38 | Placebo for LY3819253 700 mg |
| 10421007 | 11852446085 | 109_11852446085_323348w_NC10.fastq.gz | T430P   | 1.156  | 1816.0  | 785.7470167064440  | 2.48 | NPH | 28.0 | 2 | 700 | 09NOV2020 13:21 | Placebo for LY3819253 700 mg |
| 10421007 | 11852446085 | 109_11852446085_323348w_NC10.fastq.gz | S659P   | 7.0    | 500.0   | 785.7470167064440  | 2.48 | NPH | 28.0 | 2 | 700 | 09NOV2020 13:21 | Placebo for LY3819253 700 mg |
| 10421007 | 11852446085 | 109_11852446085_323348w_NC10.fastq.gz | A766V   | 13.615 | 213.0   | 785.7470167064440  | 2.48 | NPH | 28.0 | 2 | 700 | 09NOV2020 13:21 | Placebo for LY3819253 700 mg |
| 10421007 | 11852446085 | 109_11852446085_323348w_NC10.fastq.gz | Y789D   | 1.607  | 1058.0  | 785.7470167064440  | 2.48 | NPH | 28.0 | 2 | 700 | 09NOV2020 13:21 | Placebo for LY3819253 700 mg |
| 10421007 | 11852446085 | 109_11852446085_323348w_NC10.fastq.gz | P812L   | 1.493  | 67.0    | 785.7470167064440  | 2.48 | NPH | 28.0 | 2 | 700 | 09NOV2020 13:21 | Placebo for LY3819253 700 mg |
| 10061009 | 11820993422 | 160_11820993422_323348w_NE10.fastq.gz | T430P   | 1.272  | 4246.0  | 1803.7101449275400 | 3.14 | NPH | 28.0 | 2 | 700 | 09DEC2020 09:14 | Placebo for LY3819253 700 mg |
| 10061009 | 11820993422 | 160_11820993422_323348w_NE10.fastq.gz | S680F   | 17.062 | 1307.0  | 1803.7101449275400 | 3.14 | NPH | 28.0 | 2 | 700 | 09DEC2020 09:14 | Placebo for LY3819253 700 mg |
| 10061009 | 11820993422 | 160_11820993422_323348w_NE10.fastq.gz | S708F   | 15.643 | 1368.0  | 1803.7101449275400 | 3.14 | NPH | 28.0 | 2 | 700 | 09DEC2020 09:14 | Placebo for LY3819253 700 mg |
| 10061009 | 11820993422 | 160_11820993422_323348w_NE10.fastq.gz | P715S   | 15.861 | 1469.0  | 1803.7101449275400 | 3.14 | NPH | 28.0 | 2 | 700 | 09DEC2020 09:14 | Placebo for LY3819253 700 mg |
| 10061009 | 11820993422 | 160_11820993422_323348w_NE1           |         |        |         |                    |      |     |      |   |     |                 |                              |
