# Supplementary material
Source: PubMed Central journal article supplement (PMC9675946)
Supplement: NIHMS1845806-supplement-1845806_SD_Fig_5.pdf [file NIHMS1845806-supplement-1845806_SD_Fig_5.pdf]

Figure 5a

B2\_7\_NP

| Days_since_symptom_onset | Visit_day | NP_viral_load | E484 | 484K |
|--------------------------|-----------|---------------|------|------|
| 4                        | 0         | 7.7           | 100  |      |
| 5                        | 1         |               |      |      |
| 6                        | 2         |               |      |      |
| 7                        | 3         | 5.44          | 100  |      |
| 8                        | 4         |               |      |      |
| 9                        | 5         |               |      |      |
| 10                       | 6         |               |      |      |
| 11                       | 7         | 4.94          |      | 100  |
| 12                       |           |               |      |      |
| 13                       |           |               |      |      |
| 14                       | 10        |               |      |      |
| 15                       | 11        |               |      |      |
| 16                       | 12        |               |      |      |
| 17                       | 13        |               |      |      |
| 18                       | 14        | 6.22          |      | 100  |
|                          |           |               |      |      |
|                          |           |               |      |      |
|                          |           |               |      |      |
|                          |           |               |      |      |
|                          |           |               |      |      |
|                          |           |               |      |      |
|                          |           |               |      |      |
|                          |           |               |      |      |
|                          |           |               |      |      |
|                          |           |               |      |      |
|                          |           |               |      |      |
|                          |           |               |      |      |
|                          |           |               |      |      |
|                          |           |               |      |      |
|                          |           |               |      |      |
|                          |           |               |      |      |
|                          |           |               |      |      |
|                          |           |               |      |      |
|                          |           |               |      |      |
| 32                       | 28        | 1             |      |      |

B2\_7\_AN

| Days_since_symptom_onset | Visit_day | AN_viral_load | E484 | 484K | Daily_Symptom_score |
|--------------------------|-----------|---------------|------|------|---------------------|
| 4                        | 0         | 7.29          | 100  |      | 9                   |
| 5                        | 1         | 7.01          | 100  |      | 6                   |
| 6                        | 2         | 6.43          | 100  |      | 6                   |
| 7                        | 3         | 5.33          | 100  |      | 5                   |
| 8                        | 4         | 4.16          | 100  |      | 6                   |
| 9                        | 5         | 3.62          | 100  |      | 5                   |
| 10                       | 6         | 2.59          | 8    | 92   | 0                   |
| 11                       | 7         | 4.97          | 2    | 98   | 0                   |
| 12                       |           |               |      |      | 0                   |
| 13                       |           |               |      |      | 1                   |
| 14                       | 10        | 6.61          | 34   | 66   | 6                   |
| 15                       | 11        | 7.74          | 14   | 86   | 8                   |
| 16                       | 12        | 7.51          |      | 100  | 10                  |
| 17                       | 13        | 6.86          |      | 100  | 11                  |
| 18                       | 14        | 4.59          |      | 100  | 9                   |
|                          |           |               |      |      | 9                   |
|                          |           |               |      |      | 5                   |
|                          |           |               |      |      | 8                   |
|                          |           |               |      |      | 5                   |
|                          |           |               |      |      | 16                  |
|                          |           |               |      |      | 16                  |
|                          |           |               |      |      | 9                   |
|                          |           |               |      |      | 15                  |
|                          |           |               |      |      | 15                  |
|                          |           |               |      |      | 13                  |
|                          |           |               |      |      | 6                   |
|                          |           |               |      |      |                     |
|                          |           |               |      |      | 5                   |
| 32                       | 28        | 1             |      |      | 3                   |

Figure 5b VLs

| Days Since Resistance Emergence | -3   | -2   | -1   | 0    | 1    | 2    | 3    | 4    | 5    | 6    | 7    | 8    | 9    | 10   | 11*  | 12*  | 13*  | 14* | 15* | 16* | 17* | 18* | 19* | 20* | 21* | 22* | 23* | 24* | 25* | 26* | 27* |  |  |   |   |   |   |
|---------------------------------|------|------|------|------|------|------|------|------|------|------|------|------|------|------|------|------|------|-----|-----|-----|-----|-----|-----|-----|-----|-----|-----|-----|-----|-----|-----|--|--|---|---|---|---|
|                                 | 1    | 0    | 1    | 3.51 | 0    | 5.2  | 4.27 | 3.6  | 3.27 | 1    |      |      |      |      |      |      | 2.25 |     |     |     |     |     |     | 0   |     |     |     |     |     |     |     |  |  | 0 |   |   |   |
|                                 |      |      | 5.61 | 3.57 | 3.94 | 3.45 | 4.3  | 4.9  | 4.27 | 3.56 | 6.55 | 5.69 | 5.41 | 6.82 | 6.82 | 5.07 | 3.81 |     |     |     |     |     |     | 0   |     |     |     |     |     |     |     |  |  |   |   |   |   |
|                                 | 7.52 | 5.28 | 4.22 | 5.76 | 6.77 |      | 7.77 | 6.85 | 6.73 | 5.72 | 4.15 | 3.45 | 1    | 0    |      |      |      |     |     |     |     | 0   |     |     |     |     |     |     |     |     |     |  |  |   | 0 |   |   |
|                                 | 7.33 | 5.14 | 5.94 | 3.88 | 3.99 | 4.22 | 3.37 |      | 3.55 | 2.57 | 2.28 | 4.16 | 2.99 | 2.36 |      |      |      |     |     |     |     | 0   |     |     |     |     |     |     |     |     |     |  |  |   | 0 |   |   |
|                                 | 6.83 | 4.65 | 2.46 | 3.06 | 3.85 | 4.53 | 2.05 | 3.42 | 5.77 | 4.81 | 5.08 | 4.61 | 3.89 | 2.74 |      |      |      |     |     |     |     | 0   |     |     |     |     |     |     |     |     |     |  |  |   | 0 |   |   |
|                                 | 5.33 | 4.16 | 3.62 | 2.59 | 4.97 |      |      | 6.61 | 7.74 | 7.51 | 6.86 | 4.59 |      |      |      |      |      |     |     |     |     |     |     |     |     |     | 1   |     |     |     |     |  |  |   |   | 0 |   |
|                                 | 5.61 | 7.24 | 4.62 | 6.7  | 7    | 5.46 | 6.65 | 6.78 | 6.35 | 5.52 | 5.41 | 4.16 | 5.26 | 3.7  |      |      |      |     |     |     |     | 0   |     |     |     |     |     |     |     |     |     |  |  |   |   | 0 |   |
|                                 | 4.63 | 1    | 1    | 7    | 1    | 0    | 0    | 0    | 0    | 0    | 0    | 0    | 0    | 0    |      |      |      |     |     |     | 0   |     |     |     |     |     |     |     |     |     |     |  |  |   |   |   |   |
|                                 | 2.08 | 1    | 1    | 0    | 0    | 1    | 0    | 0    | 0    | 0    | 0    | 0    | 0    | 1    |      | 0    | 0    | 0   |     |     |     |     |     |     |     |     |     |     |     |     |     |  |  |   |   |   |   |
|                                 | 5.06 | 5.42 | 4.08 | 3.21 | 4.08 | 0    | 2.62 | 1    | 2.9  | 2.2  | 2.37 | 1    | 2.19 | 0    |      |      | 1    | 0   |     |     |     |     |     |     |     |     |     |     |     |     |     |  |  |   |   |   |   |
|                                 | 2.45 | 1    | 2.12 | 1    | 2.41 | 0    | 0    | 0    | 1    | 0    | 1    | 0    | 1    | 1    |      |      |      |     |     |     |     | 1   |     |     |     |     |     |     |     |     |     |  |  |   | 1 |   |   |
|                                 | 2.75 | 3.82 | 0    | 0    | 1    | 0    | 1    | 1    | 1    | 1    | 0    | 0    | 0    | 0    |      |      |      |     |     |     |     | 0   |     |     |     |     |     |     |     |     |     |  |  |   | 0 |   |   |
|                                 | 3.41 | 3.32 | 2.54 | 2.18 | 1    | 0    | 0    | 1    | 1    | 1    | 0    | 1    | 0    | 0    |      |      |      |     |     |     |     |     |     |     |     |     |     |     |     |     |     |  |  |   |   | 0 |   |
|                                 | 6.16 | 4.24 | 4.68 | 3.98 | 2.34 | 1    | 2.58 |      |      |      |      |      |      |      |      |      |      |     |     |     |     |     |     |     |     |     |     |     |     |     |     |  |  |   |   | 0 |   |
|                                 | 5.64 | 4.97 | 3.51 |      |      |      |      | 0    | 1    | 0    | 0    | 0    | 1    |      |      |      |      |     |     |     |     | 1   |     |     |     |     |     |     |     |     |     |  |  |   |   | 0 |   |
|                                 | 6.86 | 5.22 | 4.08 | 3.59 | 2.21 | 1    | 1    | 1    | 0    | 0    | 0    | 0    | 0    | 0    |      |      |      |     |     |     |     |     |     |     |     |     |     |     |     |     |     |  |  |   |   | 0 |   |
|                                 | 5.45 | 5.33 | 3.2  | 3.21 | 2.31 | 1    | 1    | 1    | 1    | 1    | 1    | 1    | 0    | 0    |      |      |      |     |     |     |     |     |     |     |     |     |     |     |     |     |     |  |  |   |   | 1 |   |
|                                 | 1    | 1    | 1    | 0    | 0    | 0    | 0    | 0    | 0    | 0    | 0    | 0    | 0    | 0    |      |      |      |     |     |     |     |     |     |     |     |     |     |     |     |     |     |  |  |   |   | 0 |   |
|                                 | 3.67 | 3.8  | 2.7  | 2.18 | 1    | 1    | 0    | 0    | 0    | 0    | 0    | 0    | 0    | 0    |      |      |      |     |     |     |     |     |     |     |     |     |     |     |     |     |     |  |  |   |   | 0 |   |
|                                 | 4.49 | 4.04 | 2.97 | 3.62 | 2.45 | 1    | 1    | 0    | 0    | 0    | 1    | 0    | 0    | 0    |      |      |      |     |     |     |     |     |     |     |     |     |     |     |     |     |     |  |  |   |   | 0 |   |
|                                 | 1    | 0    | 0    | 0    | 1    | 0    | 0    | 0    | 0    | 0    | 0    | 0    | 0    | 0    |      |      |      |     |     |     |     |     |     |     |     |     |     |     |     |     |     |  |  |   |   | 0 |   |
|                                 | 5.73 | 3.99 | 5.6  | 1    | 3.91 | 1    | 2.44 | 0    | 1    | 0    | 0    | 0    | 0    | 0    |      |      |      |     |     |     |     |     |     |     |     |     |     |     |     |     |     |  |  |   |   | 0 |   |
|                                 | 2.31 | 1    | 2.45 | 1    | 0    | 1    | 0    | 0    | 0    | 0    | 0    | 0    | 0    | 0    |      |      |      |     |     |     |     |     |     |     |     |     |     |     |     |     |     |  |  |   |   | 0 |   |
|                                 | 2.71 | 2.68 | 0    | 0    | 0    | 0    | 0    | 0    | 0    | 0    | 0    | 0    | 0    | 0    |      |      |      |     |     |     |     |     |     |     |     |     |     |     |     |     |     |  |  |   |   | 0 |   |
|                                 | 2.83 | 0    | 1    | 2.66 | 2.13 |      | 1    | 1    | 0    | 0    | 0    | 0    | 1    | 0    |      |      |      |     |     |     |     |     |     |     |     |     |     |     |     |     |     |  |  |   |   | 0 |   |
|                                 | 2.81 | 0    | 3.66 | 0    | 0    | 0    | 1    | 0    | 0    | 0    | 0    | 0    | 0    | 0    |      |      |      |     |     |     |     |     |     |     |     |     |     |     |     |     |     |  |  |   |   | 0 |   |
|                                 | 0    | 2.42 | 0    | 0    | 0    | 0    | 0    | 0    | 0    | 0    | 0    | 0    | 0    | 0    |      |      |      |     |     |     |     |     |     |     |     |     |     |     |     |     |     |  |  |   |   | 0 |   |
|                                 | 4.15 | 2.18 | 3.56 | 1    | 1    | 0    | 1    | 1    | 0    | 0    | 1    | 0    | 1    | 1    |      |      |      |     |     |     |     |     |     |     |     |     |     |     |     |     |     |  |  |   |   | 0 |   |
|                                 | 3.62 | 2.98 | 1    | 1    | 2.3  | 1    | 1    | 0    | 0    | 0    | 0    | 0    | 0    | 1    |      |      |      |     |     |     |     |     |     |     |     |     |     |     |     |     |     |  |  |   |   | 0 |   |
|                                 | 4.26 | 3.83 | 2.68 | 0    | 2.5  | 2.34 | 1    | 0    | 0    | 0    | 0    | 0    | 1    | 0    | 1    |      |      |     |     |     |     |     |     |     |     |     |     |     |     |     |     |  |  |   |   | 0 |   |
|                                 | 4.9  | 0    | 2.32 | 0    | 1    | 0    | 1    | 1    | 1    | 0    | 0    | 0    | 0    | 0    |      |      |      |     |     |     |     |     |     |     |     |     |     |     |     |     |     |  |  |   |   | 0 |   |
|                                 | 0    | 4.5  | 0    | 0    | 0    | 0    | 0    | 0    | 0    | 0    | 0    | 0    | 0    | 0    |      |      |      |     |     |     |     |     |     |     |     |     |     |     |     |     |     |  |  |   |   | 0 |   |
|                                 | 6.03 | 2.93 | 5.5  | 5.82 | 4.1  | 4.33 | 2.98 | 2.25 | 1    | 1    | 1    | 1    | 0    | 0    |      |      |      |     |     |     |     |     |     |     |     |     |     |     |     |     |     |  |  |   |   | 1 |   |
|                                 | 4.21 | 3.68 | 3.09 | 0    | 3.21 | 0    | 0    |      |      | 0    | 0    | 0    | 0    | 1    |      |      |      |     |     |     |     |     |     |     |     |     |     |     |     |     |     |  |  |   |   | 0 |   |
|                                 | 3.8  | 2.26 | 2.01 |      |      |      |      |      |      |      |      |      |      |      |      |      |      |     |     |     |     |     |     |     |     |     |     |     |     |     |     |  |  |   |   |   | 0 |
|                                 | 2.73 | 4.73 | 3.99 | 2.69 | 2.47 | 2.04 | 1    | 1    | 0    | 1    | 1    | 1    | 0    | 1    |      |      |      |     |     |     |     |     |     |     |     |     |     |     |     |     |     |  |  |   |   | 0 |   |
|                                 | 4.69 | 1    | 1    | 0    | 0    | 0    | 0    | 1    | 0    | 0    | 0    | 0    | 0    | 0    |      |      |      |     |     |     |     |     |     |     |     |     |     |     |     |     |     |  |  |   |   | 0 |   |
|                                 | 3.07 | 0    | 0    | 3.16 | 2.46 | 2.71 | 1    | 2.65 | 0    | 0    | 0    | 0    | 0    | 0    |      |      |      |     |     |     |     |     |     |     |     |     |     |     |     |     |     |  |  |   |   | 0 |   |
|                                 | 0    | 5.41 | 5.21 | 1    | 0    | 0    | 1    | 0    | 0    | 0    | 0    | 0    | 0    | 0    |      |      |      |     |     |     |     |     |     |     |     |     |     |     |     |     |     |  |  |   |   | 0 |   |
|                                 | 4.68 | 2.91 | 2.31 | 0    | 0    | 0    | 0    | 0    | 0    | 0    | 0    | 0    | 0    | 0    |      |      |      |     |     |     |     |     |     |     |     |     |     |     |     |     |     |  |  |   |   | 0 |   |
|                                 | 0    | 3.63 | 1    | 2.75 | 2.12 | 0    | 0    | 1    | 0    | 0    | 0    | 0    | 0    | 0    |      |      |      |     |     |     |     |     |     |     |     |     |     |     |     |     |     |  |  |   |   | 1 |   |
|                                 | 3.94 | 4.2  | 2.98 | 1    | 1    | 1    | 0    | 1    | 1    | 0    | 1    | 1    | 0    | 1    |      |      |      |     |     |     |     |     |     |     |     |     |     |     |     |     |     |  |  |   |   | 0 |   |
|                                 | 1    | 0    | 1    | 0    | 0    | 1    | 0    | 0    | 0    | 0    | 0    | 0    | 0    | 1    |      |      |      |     |     |     |     |     |     |     |     |     |     |     |     |     |     |  |  |   |   | 0 |   |
|                                 | 3.41 | 1    | 3.21 | 2.55 | 2.58 | 3.22 | 1    | 3.04 |      | 0    | 1    | 1    | 0    | 1    |      |      |      |     |     |     |     | 1   |     |     |     |     |     |     |     |     |     |  |  |   |   | 0 |   |
|                                 | 0    | 0    | 0    | 0    | 0    | 0    | 0    | 1    | 0    | 0    | 0    | 0    | 0    | 0    |      |      |      |     |     |     |     |     |     |     |     |     |     |     |     |     |     |  |  |   |   | 0 |   |
|                                 | 4.2  | 3.63 | 4.54 | 0    | 0    | 0    | 0    | 1    | 0    | 0    | 0    | 0    | 0    | 0    |      |      |      |     |     |     |     |     |     |     |     |     |     |     |     |     |     |  |  |   |   | 0 |   |
|                                 | 1    | 4.55 | 0    | 0    | 0    | 0    | 0    | 0    | 0    | 0    | 0    | 0    | 0    | 0    |      |      |      |     |     |     |     |     |     |     |     |     |     |     |     |     |     |  |  |   |   | 0 |   |
|                                 | 4.32 | 2.69 | 1    | 1    | 1    | 0    | 1    | 1    | 1    | 0    | 0    | 0    | 0    | 1    |      |      |      |     |     |     |     |     |     |     |     |     |     |     |     |     |     |  |  |   |   | 0 |   |
|                                 | 1    | 1    | 5.6  | 1    | 1    | 1    | 0    | 0    | 1    | 1    | 0    | 0    | 1    | 0    |      |      |      |     |     |     |     |     |     |     |     |     |     |     |     |     |     |  |  |   |   | 0 |   |
|                                 | 3.63 | 3.38 | 3.02 | 1    | 1    | 0    | 0    | 0    | 0    | 1    | 0    | 0    | 0    | 0    |      |      |      |     |     |     |     |     |     |     |     |     |     |     |     |     |     |  |  |   |   | 0 |   |
|                                 | 2.41 | 3.21 | 1    | 1    | 1    | 0    | 1    | 0    | 1    | 0    | 0    | 1    | 0    | 1    |      |      |      |     |     |     |     |     |     |     |     |     |     |     |     |     |     |  |  |   |   | 0 |   |
|                                 | 4.5  | 0    | 2.9  | 0    | 0    | 0    | 0    | 0    | 0    | 0    | 0    | 0    | 1    | 0    |      |      |      |     |     |     |     |     |     |     |     |     |     |     |     |     |     |  |  |   |   | 0 |   |
|                                 | 1    | 3.44 | 2.8  | 1    | 1    | 3.27 | 2.81 | 4.16 | 3.36 | 0    | 1    | 0    | 1    | 1    |      |      |      |     |     |     |     |     |     |     |     |     |     |     |     |     |     |  |  |   |   | 0 |   |
|                                 | 4.88 | 1    | 1    | 0    | 1    | 1    | 1    | 0    | 1    | 0    | 0    | 0    | 0    | 0    |      |      |      |     |     |     |     |     |     |     |     |     |     |     |     |     |     |  |  |   |   | 0 |   |
|                                 | 1    | 0    | 3.1  | 0    | 0    | 0    | 0    | 0    | 0    | 0    | 0    | 0    | 0    | 0    |      |      |      |     |     |     |     |     |     |     |     |     |     |     |     |     |     |  |  |   |   | 0 |   |
|                                 | 3.47 | 3.13 | 0    | 1    | 1    | 2.06 | 1    | 1    | 0    | 1    | 1    | 1    | 0    | 1    |      |      |      |     |     |     |     |     |     |     |     |     |     |     |     |     |     |  |  |   |   | 0 |   |
|                                 | 4.79 | 3.85 | 0    | 0    | 1    | 1    | 1    | 1    | 0    | 0    | 0    | 0    | 0    | 1    |      |      |      |     |     |     |     |     |     |     |     |     |     |     |     |     |     |  |  |   |   | 0 |   |
|                                 | 2.96 | 3.74 | 3.01 | 0    | 0    | 0    | 0    | 0    | 0    | 0    | 0    | 0    | 0    | 0    |      |      |      |     |     |     |     |     |     |     |     |     |     |     |     |     |     |  |  |   |   | 0 |   |
|                                 | 3.91 | 1    | 0    | 2.11 | 2.06 | 1    | 1    | 1    | 2.35 | 0    | 1    | 1    | 1    |      |      |      |      |     |     |     |     |     |     |     |     |     |     |     |     |     |     |  |  |   |   | 0 |   |
|                                 | 2.48 | 0    | 3.84 | 0    | 0    | 0    | 1    | 0    | 1    | 0    | 0    | 0    | 0    | 1    |      |      |      |     |     |     |     |     |     |     |     |     |     |     |     |     |     |  |  |   |   | 0 |   |
|                                 | 0    | 5.08 | 1    | 2.07 |      |      | 1    | 1    | 1    | 1    | 1    | 1    | 0    | 1    |      |      |      |     |     |     |     |     |     |     |     |     |     |     |     |     |     |  |  |   |   | 1 |   |
|                                 | 1    | 4.11 | 0    |      |      |      |      |      |      |      |      |      |      |      |      |      |      |     |     |     |     |     |     |     |     |     |     |     |     |     |     |  |  |   |   |   | 0 |
|                                 | 4.98 | 2.4  | 0    | 1    | 1    | 0    | 0    | 1    | 1    | 0    |      | 1    | 0    | 1</  |      |      |      |     |     |     |     |     |     |     |     |     |     |     |     |     |     |  |  |   |   |   |   |
